# Supplementary material for: Single nuclei chromatin accessibility and transcriptomic map of breast tissues of women of diverse genetic ancestry
Source: bioRxiv preprint, doi:10.1101/2023.10.04.560911, version 1 (2023-10-06)
Supplement: Table S3 [file 560911_file13.xlsx]

## Sheet: avg_exp_celltype
Table S3: Average RNA expression in indicated genes in each cell type.
RNA.feature	RNA.group	RNA.avgExpr
MIR1302-2HG	Adi-1	0.00157878
FAM138A	Adi-1	0
OR4F5	Adi-1	0
AL627309.1	Adi-1	0.0519857
AL627309.3	Adi-1	0.00764826
AL627309.2	Adi-1	0.00157878
AL627309.5	Adi-1	0.214129
AL627309.4	Adi-1	0.00315508
AP006222.2	Adi-1	0.00236724
AL732372.1	Adi-1	0
OR4F29	Adi-1	0
AC114498.1	Adi-1	0
OR4F16	Adi-1	0
AL669831.2	Adi-1	0.00372058
LINC01409	Adi-1	0.65929
FAM87B	Adi-1	0.00943552
LINC01128	Adi-1	1.02038
LINC00115	Adi-1	0.0352663
FAM41C	Adi-1	0.110872
AL645608.6	Adi-1	0.00236724
AL645608.2	Adi-1	0
AL645608.4	Adi-1	0.000789703
LINC02593	Adi-1	0
SAMD11	Adi-1	0.0107793
NOC2L	Adi-1	0.160502
KLHL17	Adi-1	0.0331911
PLEKHN1	Adi-1	0.00551487
PERM1	Adi-1	0.00529351
AL645608.7	Adi-1	0.00315508
HES4	Adi-1	0.0883003
ISG15	Adi-1	0.0232065
AL645608.1	Adi-1	0.00293319
AGRN	Adi-1	0.0373372
AL645608.5	Adi-1	0
AL645608.8	Adi-1	0
RNF223	Adi-1	0.000789703
C1orf159	Adi-1	0.344116
AL390719.3	Adi-1	0.0148987
LINC01342	Adi-1	0.00157878
AL390719.2	Adi-1	0.0191213
TTLL10-AS1	Adi-1	0.00157878
TTLL10	Adi-1	0.00630023
TNFRSF18	Adi-1	0.000789703
TNFRSF4	Adi-1	0.00394229
SDF4	Adi-1	0.142215
B3GALT6	Adi-1	0.0078691
C1QTNF12	Adi-1	0.012561
AL162741.1	Adi-1	0.00157878
UBE2J2	Adi-1	0.575736
LINC01786	Adi-1	0.0373372
SCNN1D	Adi-1	0.0375516
ACAP3	Adi-1	0.27835
PUSL1	Adi-1	0.00551487
INTS11	Adi-1	0.146822
AL139287.1	Adi-1	0.000789703
CPTP	Adi-1	0.0115606
TAS1R3	Adi-1	0.00157878
DVL1	Adi-1	0.0833514
MXRA8	Adi-1	0.747064
AURKAIP1	Adi-1	0.0953044
CCNL2	Adi-1	1.51825
MRPL20-AS1	Adi-1	0.0162352
MRPL20	Adi-1	0.334602
AL391244.2	Adi-1	0.00943552
ANKRD65	Adi-1	0.0235434
AL391244.1	Adi-1	0.00236724
TMEM88B	Adi-1	0
LINC01770	Adi-1	0.00630023
VWA1	Adi-1	0.0201142
ATAD3C	Adi-1	0.122642
ATAD3B	Adi-1	0.198181
ATAD3A	Adi-1	0.0866486
TMEM240	Adi-1	0.0117806
SSU72	Adi-1	0.295148
AL645728.1	Adi-1	0.0379654
FNDC10	Adi-1	0.00157878
AL691432.4	Adi-1	0
AL691432.2	Adi-1	0.0189029
MIB2	Adi-1	0.105943
MMP23B	Adi-1	0.0157602
CDK11B	Adi-1	0.702226
FO704657.1	Adi-1	0.00472889
SLC35E2B	Adi-1	0.753884
CDK11A	Adi-1	0.283344
SLC35E2A	Adi-1	0.3635
NADK	Adi-1	0.698423
GNB1	Adi-1	3.17871
AL109917.1	Adi-1	0.00394229
CALML6	Adi-1	0.00708497
TMEM52	Adi-1	0.00394229
CFAP74	Adi-1	0.017231
AL391845.2	Adi-1	0
GABRD	Adi-1	0.00157878
AL391845.1	Adi-1	0
PRKCZ	Adi-1	0.0460035
AL590822.2	Adi-1	0.00630023
PRKCZ-AS1	Adi-1	0.000789703
FAAP20	Adi-1	0.179643
AL590822.1	Adi-1	0.108535
SKI	Adi-1	9.30442
AL590822.3	Adi-1	0.0303455
MORN1	Adi-1	0.136449
AL589739.1	Adi-1	0
AL513477.2	Adi-1	0.00394229
RER1	Adi-1	0.470769
PEX10	Adi-1	0.0657183
PLCH2	Adi-1	0.0152385
AL139246.1	Adi-1	0.000789703
AL139246.4	Adi-1	0
PANK4	Adi-1	0.0497332
HES5	Adi-1	0.000789703
AL139246.5	Adi-1	0.000789703
TNFRSF14-AS1	Adi-1	0.00551487
TNFRSF14	Adi-1	0.0986377
AL139246.3	Adi-1	0.00315508
PRXL2B	Adi-1	0.0123412
MMEL1	Adi-1	0.00394229
AL831784.1	Adi-1	0
TTC34	Adi-1	0.0362433
AC242022.2	Adi-1	0.000789703
AC242022.1	Adi-1	0
AL592464.2	Adi-1	0
AL592464.3	Adi-1	0
AL592464.1	Adi-1	0
AL589702.1	Adi-1	0.000789703
ACTRT2	Adi-1	0
PRDM16-DT	Adi-1	0.0212259
PRDM16	Adi-1	0.563536
AL008733.1	Adi-1	0
AL590438.1	Adi-1	0
AL354743.2	Adi-1	0.000789703
AL354743.1	Adi-1	0.000789703
ARHGEF16	Adi-1	0.0465095
AL512413.1	Adi-1	0.00157878
MEGF6	Adi-1	0.0419745
AL513320.1	Adi-1	0.00472889
TPRG1L	Adi-1	0.0304641
WRAP73	Adi-1	0.126645
TP73	Adi-1	0.0123412
AL136528.1	Adi-1	0
AL136528.2	Adi-1	0
CCDC27	Adi-1	0.00764826
SMIM1	Adi-1	0.00315508
LRRC47	Adi-1	0.118422
AL365330.1	Adi-1	0.000789703
CEP104	Adi-1	0.456115
DFFB	Adi-1	0.117829
C1orf174	Adi-1	0.0901868
LINC01134	Adi-1	0.0185644
LINC01346	Adi-1	0.000789703
LINC01345	Adi-1	0
LINC02780	Adi-1	0.00394229
AL805961.1	Adi-1	0.000789703
LINC01777	Adi-1	0.00293319
AL355602.1	Adi-1	0
Z98747.1	Adi-1	0
LINC01646	Adi-1	0.000789703
AJAP1	Adi-1	0.00394229
Z98886.1	Adi-1	0.00236724
BX005132.1	Adi-1	0
LINC02781	Adi-1	0.000789703
LINC02782	Adi-1	0
AL139823.1	Adi-1	0.00157878
Z98259.3	Adi-1	0
Z98259.2	Adi-1	0
Z98259.1	Adi-1	0
AL365255.1	Adi-1	0.00865262
NPHP4	Adi-1	0.12404
KCNAB2	Adi-1	0.0276107
CHD5	Adi-1	0.00921503
RPL22	Adi-1	0.368467
AL031847.1	Adi-1	0.000789703
RNF207	Adi-1	0.102765
ICMT	Adi-1	0.0477236
LINC00337	Adi-1	0.864596
HES3	Adi-1	0
GPR153	Adi-1	0.0937898
ACOT7	Adi-1	0.0817352
AL031848.2	Adi-1	0.0107793
HES2	Adi-1	0.00943552
ESPN	Adi-1	0.0871236
AL031848.1	Adi-1	0
TNFRSF25	Adi-1	1.71191
PLEKHG5	Adi-1	5.5193
NOL9	Adi-1	0.66533
TAS1R1	Adi-1	0.0417611
ZBTB48	Adi-1	0.131896
KLHL21	Adi-1	0.437856
PHF13	Adi-1	0.130733
THAP3	Adi-1	0.182421
DNAJC11	Adi-1	0.944282
LINC01672	Adi-1	0.000789703
AL591163.1	Adi-1	0.00157878
CAMTA1-DT	Adi-1	0.0222167
CAMTA1	Adi-1	6.34911
AL512330.1	Adi-1	0.00157878
CAMTA1-IT1	Adi-1	0
Z97987.1	Adi-1	0
AL365194.1	Adi-1	0
AL359881.3	Adi-1	0.000789703
AL359881.2	Adi-1	0.00157878
AL359881.1	Adi-1	0.000789703
VAMP3	Adi-1	0.196931
Z98884.2	Adi-1	0.00157878
PER3	Adi-1	9.70716
Z98884.1	Adi-1	0.161739
UTS2	Adi-1	0.0156768
TNFRSF9	Adi-1	0.00551487
PARK7	Adi-1	0.298404
AL034417.4	Adi-1	0.0514825
AL034417.3	Adi-1	0.0260725
ERRFI1	Adi-1	7.52879
AL034417.2	Adi-1	0.117808
LINC01714	Adi-1	0.00372058
AL358876.2	Adi-1	0
SLC45A1	Adi-1	0.0452487
RERE	Adi-1	64.3152
RERE-AS1	Adi-1	0.0388582
AL357552.2	Adi-1	0.00315508
ENO1	Adi-1	0.404474
ENO1-AS1	Adi-1	0.0123412
CA6	Adi-1	0.0215267
SLC2A7	Adi-1	0.00394229
SLC2A5	Adi-1	0.466314
GPR157	Adi-1	0.138963
MIR34AHG	Adi-1	0.622417
LNCTAM34A	Adi-1	0.0214437
H6PD	Adi-1	0.593069
SPSB1	Adi-1	3.89214
BX323043.1	Adi-1	0.000789703
LINC02606	Adi-1	0.0187828
AL928921.1	Adi-1	0.000789703
SLC25A33	Adi-1	5.7166
TMEM201	Adi-1	0.0624944
PIK3CD	Adi-1	0.0970616
PIK3CD-AS1	Adi-1	0.000789703
PIK3CD-AS2	Adi-1	0.0107793
CLSTN1	Adi-1	4.33282
CTNNBIP1	Adi-1	0.406145
AL357140.1	Adi-1	0.000789703
AL357140.4	Adi-1	0.868249
LZIC	Adi-1	0.132877
AL357140.2	Adi-1	0.000789703
NMNAT1	Adi-1	0.280167
AL603962.1	Adi-1	0
RBP7	Adi-1	0.0525528
UBE4B	Adi-1	3.43554
KIF1B	Adi-1	7.6603
AL139424.3	Adi-1	0.0291465
AL139424.2	Adi-1	0.0206702
PGD	Adi-1	2.88584
AL139424.1	Adi-1	0
CENPS	Adi-1	0.0371228
CORT	Adi-1	0.00472889
DFFA	Adi-1	0.221856
AL354956.1	Adi-1	0
PEX14	Adi-1	3.68718
AL139423.2	Adi-1	0.0253025
CASZ1	Adi-1	1.64899
AL139423.1	Adi-1	0.00921503
C1orf127	Adi-1	0.00394229
TARDBP	Adi-1	0.778684
MASP2	Adi-1	0.0216615
AL109811.2	Adi-1	0.0847696
SRM	Adi-1	0.072182
EXOSC10	Adi-1	0.506368
AL109811.1	Adi-1	0.084944
EXOSC10-AS1	Adi-1	0
MTOR	Adi-1	1.71673
MTOR-AS1	Adi-1	0.0131212
ANGPTL7	Adi-1	0.00708497
UBIAD1	Adi-1	0.0451318
AL031291.1	Adi-1	0.00394229
DISP3	Adi-1	0.00630023
AL590989.1	Adi-1	0
LINC01647	Adi-1	0.00157878
AL031731.1	Adi-1	0.00999749
FBXO2	Adi-1	0.00529351
FBXO44	Adi-1	0.0678559
FBXO6	Adi-1	0.0405906
MAD2L2	Adi-1	0.0218793
DRAXIN	Adi-1	0.00630023
AGTRAP	Adi-1	0.0278272
C1orf167	Adi-1	0.0078691
AL953897.1	Adi-1	0
MTHFR	Adi-1	0.16905
CLCN6	Adi-1	0.356613
NPPA	Adi-1	0.00607904
NPPB	Adi-1	0
AL021155.5	Adi-1	0.349433
KIAA2013	Adi-1	0.0859381
PLOD1	Adi-1	0.201293
AL096840.2	Adi-1	0.00394229
MFN2	Adi-1	0.26955
MIIP	Adi-1	0.0842481
TNFRSF8	Adi-1	0.0148987
AL357835.1	Adi-1	0.00157878
TNFRSF1B	Adi-1	0.0963902
VPS13D	Adi-1	5.90043
LINC02766	Adi-1	0.00157878
DHRS3	Adi-1	20.6341
AC254633.1	Adi-1	0.0102178
AADACL4	Adi-1	0.00315508
AADACL3	Adi-1	0
C1orf158	Adi-1	0.00157878
PRAMEF12	Adi-1	0
PRAMEF1	Adi-1	0
LINC01784	Adi-1	0
PRAMEF11	Adi-1	0
HNRNPCL1	Adi-1	0
PRAMEF2	Adi-1	0
PRAMEF4	Adi-1	0.000789703
PRAMEF10	Adi-1	0
PRAMEF7	Adi-1	0
PRAMEF6	Adi-1	0
PRAMEF27	Adi-1	0
HNRNPCL3	Adi-1	0
PRAMEF25	Adi-1	0
HNRNPCL2	Adi-1	0
AC245056.1	Adi-1	0
PRAMEF26	Adi-1	0
HNRNPCL4	Adi-1	0
PRAMEF9	Adi-1	0
PRAMEF13	Adi-1	0
PRAMEF18	Adi-1	0
PRAMEF5	Adi-1	0
PRAMEF8	Adi-1	0
PRAMEF33	Adi-1	0
PRAMEF15	Adi-1	0
AC243961.1	Adi-1	0
PRAMEF14	Adi-1	0
PRAMEF19	Adi-1	0
PRAMEF17	Adi-1	0
PRAMEF20	Adi-1	0.000789703
LRRC38	Adi-1	0.00315508
AL354712.1	Adi-1	0
PDPN	Adi-1	0.0195579
AL359771.1	Adi-1	0.000789703
PRDM2	Adi-1	2.51863
KAZN	Adi-1	27.3337
AL357873.1	Adi-1	0.0516272
KAZN-AS1	Adi-1	0.032545
AL031293.1	Adi-1	0.00315508
TMEM51-AS1	Adi-1	0.0133409
TMEM51	Adi-1	0.0419745
C1orf195	Adi-1	0.00551487
FHAD1	Adi-1	0.0308958
AL031283.2	Adi-1	0.000789703
AL031283.3	Adi-1	0
AL031283.1	Adi-1	0
EFHD2	Adi-1	0.0332731
CTRC	Adi-1	0.00236724
CELA2A	Adi-1	0
CELA2B	Adi-1	0.00630023
CASP9	Adi-1	0.169107
DNAJC16	Adi-1	0.504186
AL121992.3	Adi-1	0
AGMAT	Adi-1	0.0300323
AL121992.1	Adi-1	0.012561
DDI2	Adi-1	7.04495
RSC1A1	Adi-1	0
AL121992.2	Adi-1	0
PLEKHM2	Adi-1	0.574647
AL450998.3	Adi-1	0.0164542
SLC25A34	Adi-1	0.0216615
SLC25A34-AS1	Adi-1	0.00157878
TMEM82	Adi-1	0.00394229
FBLIM1	Adi-1	17.3152
UQCRHL	Adi-1	0.00630023
AL450998.2	Adi-1	0.940087
SPEN	Adi-1	3.09004
ZBTB17	Adi-1	0.14141
SRARP	Adi-1	0.0107793
AL355994.3	Adi-1	0
HSPB7	Adi-1	7.36232
CLCNKA	Adi-1	0.00551487
CLCNKB	Adi-1	0.00236724
FAM131C	Adi-1	0
EPHA2	Adi-1	0.019896
AL451042.2	Adi-1	0.000789703
AL451042.1	Adi-1	0.00236724
ARHGEF19-AS1	Adi-1	0.000789703
ARHGEF19	Adi-1	0.0102178
AL109627.1	Adi-1	0.00394229
CPLANE2	Adi-1	0.0144601
FBXO42	Adi-1	4.03983
SZRD1	Adi-1	0.35218
SPATA21	Adi-1	0.0691676
NECAP2	Adi-1	0.114893
LINC01772	Adi-1	0.0302482
AL137802.2	Adi-1	0.00630023
AL137802.1	Adi-1	0.000789703
LINC01783	Adi-1	0.0271411
NBPF1	Adi-1	0.26321
AL137798.1	Adi-1	0.00157878
AL137798.2	Adi-1	0
AL021920.1	Adi-1	0
AL021920.3	Adi-1	0.00157878
CROCC	Adi-1	14.3235
BX284668.1	Adi-1	0
BX284668.2	Adi-1	0.00394229
BX284668.5	Adi-1	0.0262893
BX284668.6	Adi-1	0.0078691
MFAP2	Adi-1	0.0165376
AL049569.2	Adi-1	0
AL049569.1	Adi-1	0.0444934
ATP13A2	Adi-1	0.131062
SDHB	Adi-1	0.827927
PADI2	Adi-1	1.57557
LINC02783	Adi-1	0.00236724
AL590644.1	Adi-1	0
PADI1	Adi-1	0.00394229
PADI3	Adi-1	0.00157878
PADI4	Adi-1	0.00865262
PADI6	Adi-1	0.00551487
RCC2-AS1	Adi-1	0
RCC2	Adi-1	0.361861
ARHGEF10L	Adi-1	1.15429
LINC02810	Adi-1	0.00315508
ACTL8	Adi-1	0.00394229
AL357509.1	Adi-1	0.00236724
LINC01654	Adi-1	0.00157878
IGSF21	Adi-1	0.0141201
IGSF21-AS1	Adi-1	0
AL591896.1	Adi-1	0.000789703
KLHDC7A	Adi-1	0.00472889
PAX7	Adi-1	0.00708497
TAS1R2	Adi-1	0.00236724
ALDH4A1	Adi-1	0.866131
IFFO2	Adi-1	0.417674
AL137127.1	Adi-1	0.00315508
UBR4	Adi-1	1.82549
EMC1-AS1	Adi-1	0.339693
EMC1	Adi-1	0.147801
MRTO4	Adi-1	0.0654304
AKR7A3	Adi-1	0.0141201
AKR7A2	Adi-1	0.107406
SLC66A1	Adi-1	0.0436204
CAPZB	Adi-1	2.109
MICOS10	Adi-1	0.214462
AL031727.2	Adi-1	0.0103017
NBL1	Adi-1	0.153446
HTR6	Adi-1	0.00236724
TMCO4	Adi-1	1.14769
RNF186	Adi-1	0
AL391883.1	Adi-1	0.425625
OTUD3	Adi-1	0.189876
PLA2G2E	Adi-1	0
PLA2G2A	Adi-1	13.3152
PLA2G5	Adi-1	0.00708497
PLA2G2D	Adi-1	0
PLA2G2F	Adi-1	0.000789703
Z98257.1	Adi-1	0
PLA2G2C	Adi-1	0.00157878
UBXN10-AS1	Adi-1	0
UBXN10	Adi-1	0
LINC01757	Adi-1	0
Z98257.2	Adi-1	0
VWA5B1	Adi-1	0.00394229
AL020998.1	Adi-1	0.000789703
LINC01141	Adi-1	0.00157878
AL139254.1	Adi-1	0
AL139254.2	Adi-1	0
AL139254.3	Adi-1	0
CAMK2N1	Adi-1	0.0154576
MUL1	Adi-1	0.0517387
FAM43B	Adi-1	0.000789703
CDA	Adi-1	0.00630023
PINK1	Adi-1	0.0883144
PINK1-AS	Adi-1	0.0396178
DDOST	Adi-1	0.106964
KIF17	Adi-1	0.0139006
SH2D5	Adi-1	0.000789703
AL663074.1	Adi-1	0
HP1BP3	Adi-1	8.34024
EIF4G3	Adi-1	11.8573
AL031005.2	Adi-1	0.000789703
ECE1	Adi-1	16.3153
AL031005.1	Adi-1	0.000789703
AL031728.1	Adi-1	0.00315508
AL592309.2	Adi-1	0
NBPF3	Adi-1	0.483054
ALPL	Adi-1	0.0492574
LINC02596	Adi-1	0.00607904
RAP1GAP	Adi-1	0.0457028
USP48	Adi-1	4.38309
LDLRAD2	Adi-1	0.0787405
HSPG2	Adi-1	10.4114
CELA3B	Adi-1	0.00472889
CELA3A	Adi-1	0.00236724
LINC01635	Adi-1	0.000789703
LINC00339	Adi-1	0.0656389
CDC42	Adi-1	1.09585
CDC42-AS1	Adi-1	0.0443764
CDC42-IT1	Adi-1	0.0331911
WNT4	Adi-1	0.0373662
AL445253.1	Adi-1	0.0109995
ZBTB40	Adi-1	0.8277
ZBTB40-IT1	Adi-1	0.000789703
EPHA8	Adi-1	0.000789703
C1QA	Adi-1	0.0129015
C1QC	Adi-1	0.0180905
C1QB	Adi-1	0.00865262
EPHB2	Adi-1	0.332096
AL512444.1	Adi-1	0
LACTBL1	Adi-1	0.000789703
TEX46	Adi-1	0.00899448
KDM1A	Adi-1	1.07864
AL031428.1	Adi-1	0.775172
LUZP1	Adi-1	1.17065
HTR1D	Adi-1	0
LINC01355	Adi-1	0.228585
AL109936.6	Adi-1	0.0408043
HNRNPR	Adi-1	1.64436
ZNF436	Adi-1	0.125753
ZNF436-AS1	Adi-1	0.252528
AL109936.2	Adi-1	0.00472889
TCEA3	Adi-1	0.321307
ASAP3	Adi-1	0.487993
E2F2	Adi-1	0.00472889
AL021154.1	Adi-1	0
ID3	Adi-1	0.0290127
AL450043.1	Adi-1	0.000789703
MDS2	Adi-1	0.0078691
RPL11	Adi-1	0.989203
ELOA-AS1	Adi-1	0.470923
ELOA	Adi-1	0.20414
PITHD1	Adi-1	0.131882
LYPLA2	Adi-1	0.059168
GALE	Adi-1	0.0489812
HMGCL	Adi-1	0.240435
FUCA1	Adi-1	0.0514825
CNR2	Adi-1	0.0107793
AL590609.3	Adi-1	0
PNRC2	Adi-1	0.216625
SRSF10	Adi-1	0.917203
AL591178.1	Adi-1	0.00236724
MYOM3	Adi-1	0.0115606
AL591178.2	Adi-1	0
IL22RA1	Adi-1	0.00607904
IFNLR1	Adi-1	0.0256388
LINC02800	Adi-1	0
AL138902.1	Adi-1	0.00236724
GRHL3	Adi-1	0.00921503
STPG1	Adi-1	0.132495
NIPAL3	Adi-1	0.172205
RCAN3AS	Adi-1	0.0109995
RCAN3	Adi-1	38.3152
NCMAP-DT	Adi-1	0.00607904
NCMAP	Adi-1	0.198845
SRRM1	Adi-1	1.43941
AL445648.1	Adi-1	0.00394229
CLIC4	Adi-1	35.3156
RUNX3	Adi-1	0.0399493
AL445471.1	Adi-1	0.000789703
AL445471.2	Adi-1	0
LINC02793	Adi-1	0
AL050344.1	Adi-1	0.00236724
AL031432.1	Adi-1	0.00236724
SYF2	Adi-1	0.116697
AL031432.4	Adi-1	0.0478191
AL031432.5	Adi-1	0.00394229
RSRP1	Adi-1	4.66837
AL031432.3	Adi-1	0.00607904
RHD	Adi-1	0.0681781
TMEM50A	Adi-1	0.219521
RHCE	Adi-1	0.0871236
MACO1	Adi-1	1.17096
LDLRAP1	Adi-1	0.109057
AL606491.1	Adi-1	0.0102178
MAN1C1	Adi-1	0.23896
AL031280.1	Adi-1	0.00372058
SELENON	Adi-1	0.0936784
AL020996.1	Adi-1	0.0211061
MTFR1L	Adi-1	0.174525
AL020996.3	Adi-1	0
AUNIP	Adi-1	0.0141201
AL033528.2	Adi-1	0.00630023
PAQR7	Adi-1	0.0107793
STMN1	Adi-1	0.0411807
PAFAH2	Adi-1	0.272051
EXTL1	Adi-1	0.00630023
SLC30A2	Adi-1	0.00551487
AL391650.2	Adi-1	0.176697
TRIM63	Adi-1	0.00236724
PDIK1L	Adi-1	3.35436
FAM110D	Adi-1	0.00315508
C1orf232	Adi-1	0.00236724
AL391650.1	Adi-1	0.000789703
ZNF593	Adi-1	0.0293627
CNKSR1	Adi-1	0.0255195
CATSPER4	Adi-1	0.00236724
CEP85	Adi-1	0.0775982
SH3BGRL3	Adi-1	0.0677903
UBXN11	Adi-1	0.0387405
CD52	Adi-1	0.0385477
CRYBG2	Adi-1	0.00394229
ZNF683	Adi-1	0.0186476
LIN28A	Adi-1	0.00394229
DHDDS	Adi-1	11.3159
AL513365.2	Adi-1	0.0771078
HMGN2	Adi-1	0.745999
RPS6KA1	Adi-1	0.0208881
AL512408.1	Adi-1	0.000789703
ARID1A	Adi-1	3.15892
PIGV	Adi-1	0.0633229
ZDHHC18	Adi-1	0.448071
SFN	Adi-1	0.0078691
GPN2	Adi-1	0.119736
AL034380.1	Adi-1	0.00157878
GPATCH3	Adi-1	0.0438334
NUDC	Adi-1	0.269168
NR0B2	Adi-1	0
KDF1	Adi-1	0.00236724
TRNP1	Adi-1	0.0217445
TENT5B	Adi-1	0.0129015
SLC9A1	Adi-1	0.460447
AL590640.1	Adi-1	0.00315508
WDTC1	Adi-1	0.554884
TMEM222	Adi-1	0.112901
SYTL1	Adi-1	0.0399132
MAP3K6	Adi-1	0.11138
FCN3	Adi-1	0.00686396
CD164L2	Adi-1	0.00472889
GPR3	Adi-1	0.000789703
WASF2	Adi-1	6.69605
FO393419.2	Adi-1	0.0349184
BX293535.1	Adi-1	0.00394229
AHDC1	Adi-1	0.691577
FGR	Adi-1	0.019896
LINC02574	Adi-1	0
IFI6	Adi-1	0.0526403
AL445490.1	Adi-1	0.00472889
AL020997.5	Adi-1	0.00472889
FAM76A	Adi-1	2.08424
STX12	Adi-1	12.3361
AL020997.2	Adi-1	0.00551487
AL020997.3	Adi-1	0.00157878
AL020997.4	Adi-1	0.0167934
PPP1R8	Adi-1	0.226061
THEMIS2	Adi-1	0.0490455
RPA2	Adi-1	0.251706
SMPDL3B	Adi-1	0.00708497
AL512288.1	Adi-1	0.00865262
XKR8	Adi-1	0.0180072
EYA3	Adi-1	1.20403
PTAFR	Adi-1	0.0299135
DNAJC8	Adi-1	0.281442
ATP5IF1	Adi-1	0.140989
AL353622.1	Adi-1	0.01757
AL353622.2	Adi-1	0.00157878
SESN2	Adi-1	0.333853
MED18	Adi-1	0.0391899
PHACTR4	Adi-1	2.2569
RCC1	Adi-1	4.34321
SNHG3	Adi-1	0.106854
TRNAU1AP	Adi-1	0.673581
SNHG12	Adi-1	0.225541
TAF12	Adi-1	0.412303
RAB42	Adi-1	0.00394229
LINC01715	Adi-1	0.0302482
AL360012.1	Adi-1	1.19576
GMEB1	Adi-1	0.274179
YTHDF2	Adi-1	0.611762
OPRD1	Adi-1	0.0157602
AL009181.1	Adi-1	0.00394229
EPB41	Adi-1	13.0104
TMEM200B	Adi-1	0.110075
AL357500.1	Adi-1	0.00865262
SRSF4	Adi-1	4.91826
MECR	Adi-1	17.3152
AL590729.1	Adi-1	0.00157878
PTPRU	Adi-1	0.0942721
LINC01756	Adi-1	0.00236724
AC092265.1	Adi-1	0
AL645944.2	Adi-1	0
LINC01648	Adi-1	0.000789703
AL137076.1	Adi-1	0
AL161638.2	Adi-1	0.000789703
AL161638.1	Adi-1	0
MATN1	Adi-1	0.00394229
MATN1-AS1	Adi-1	0.0369373
AL137857.1	Adi-1	0
LAPTM5	Adi-1	0.04754
AL137027.1	Adi-1	0
LINC01778	Adi-1	0.00551487
AL445235.1	Adi-1	0
SDC3	Adi-1	0.0817352
PUM1	Adi-1	5.18565
NKAIN1	Adi-1	0.0164542
SNRNP40	Adi-1	0.377283
ZCCHC17	Adi-1	0.699548
AL451070.1	Adi-1	0.0414663
FABP3	Adi-1	0.0480974
SERINC2	Adi-1	0.0823202
LINC01226	Adi-1	0.0327604
AC114488.1	Adi-1	0.00630023
TINAGL1	Adi-1	0.432444
HCRTR1	Adi-1	0.0144601
PEF1	Adi-1	0.0569316
AC114488.2	Adi-1	0.00315508
AC114488.3	Adi-1	0.000789703
COL16A1	Adi-1	0.0914265
ADGRB2	Adi-1	0.0170122
AL354919.2	Adi-1	0
SPOCD1	Adi-1	0.0217445
AL354919.1	Adi-1	0.000789703
AL136115.2	Adi-1	0.115945
PTP4A2	Adi-1	1.1532
AL136115.1	Adi-1	0.0437375
AL136115.3	Adi-1	0.00157878
KHDRBS1	Adi-1	1.40721
AL445248.1	Adi-1	0.0908101
TMEM39B	Adi-1	0.189462
KPNA6	Adi-1	1.14821
AL049795.2	Adi-1	0.00315508
TXLNA	Adi-1	0.440194
CCDC28B	Adi-1	0.0472991
AL049795.1	Adi-1	0.00943552
IQCC	Adi-1	0.0117806
DCDC2B	Adi-1	0.0350152
TMEM234	Adi-1	0.103124
EIF3I	Adi-1	0.0940696
FAM167B	Adi-1	0.000789703
LCK	Adi-1	2.41217
HDAC1	Adi-1	0.10775
MARCKSL1	Adi-1	0.0348003
AL109945.1	Adi-1	0.000789703
TSSK3	Adi-1	0.0556484
FAM229A	Adi-1	0.0636258
BSDC1	Adi-1	0.761957
ZBTB8B	Adi-1	0.0195579
ZBTB8A	Adi-1	0.338004
ZBTB8OS	Adi-1	1.01683
RBBP4	Adi-1	0.969656
SYNC	Adi-1	0.250436
AC114489.1	Adi-1	0.00157878
KIAA1522	Adi-1	0.129937
YARS	Adi-1	0.735776
S100PBP	Adi-1	1.18178
FNDC5	Adi-1	0.0102178
HPCA	Adi-1	0.00157878
TMEM54	Adi-1	0.00315508
AL031602.2	Adi-1	0.0454256
RNF19B	Adi-1	3.36331
AL020995.1	Adi-1	0.179507
AK2	Adi-1	0.481743
AZIN2	Adi-1	0.0860451
TRIM62	Adi-1	0.042981
AL662907.3	Adi-1	0.0115606
ZNF362	Adi-1	0.312409
AL513327.3	Adi-1	0.00157878
A3GALT2	Adi-1	0.00315508
AL513327.1	Adi-1	0.132333
PHC2	Adi-1	0.47318
AL513327.2	Adi-1	0.0295638
ZSCAN20	Adi-1	0.0348365
CSMD2	Adi-1	0.127555
HMGB4	Adi-1	0
CSMD2-AS1	Adi-1	0.00157878
C1orf94	Adi-1	0.00157878
AC099565.1	Adi-1	0.00236724
SMIM12	Adi-1	0.253989
GJB5	Adi-1	0
GJB4	Adi-1	0
AL121988.1	Adi-1	0
GJB3	Adi-1	0.00157878
GJA4	Adi-1	0.00708497
AL122010.1	Adi-1	0
DLGAP3	Adi-1	0.00472889
TMEM35B	Adi-1	0.0772005
ZMYM6	Adi-1	1.30554
ZMYM1	Adi-1	0.64882
AL590434.1	Adi-1	0.00529351
SFPQ	Adi-1	3.43257
ZMYM4	Adi-1	5.59212
ZMYM4-AS1	Adi-1	0.147371
KIAA0319L	Adi-1	1.48503
NCDN	Adi-1	0.00943552
AC004865.2	Adi-1	0.00157878
TFAP2E	Adi-1	0.0345034
PSMB2	Adi-1	0.377023
C1orf216	Adi-1	0.0187828
CLSPN	Adi-1	5.32052
AL354864.1	Adi-1	0
AGO4	Adi-1	2.05515
AGO1	Adi-1	0.250981
AL139286.3	Adi-1	0.0142037
AL139286.2	Adi-1	0.00472889
AGO3	Adi-1	13.6911
AL138787.2	Adi-1	0.187336
TEKT2	Adi-1	0.00372058
ADPRHL2	Adi-1	0.105343
COL8A2	Adi-1	0.0156768
TRAPPC3	Adi-1	0.230002
MAP7D1	Adi-1	2.19225
THRAP3	Adi-1	5.61355
SH3D21	Adi-1	0.0996951
EVA1B	Adi-1	0.0201142
AL591845.1	Adi-1	0.0160162
STK40	Adi-1	0.64946
LSM10	Adi-1	0.0398317
OSCP1	Adi-1	0.193877
MRPS15	Adi-1	0.094238
CSF3R	Adi-1	0.0207532
AL596257.1	Adi-1	0
AC117945.2	Adi-1	0
AC117945.1	Adi-1	0.00873668
GRIK3	Adi-1	0.0467864
AL031430.1	Adi-1	0
AL353604.1	Adi-1	0.0123412
LINC01137	Adi-1	0.150523
ZC3H12A	Adi-1	0.0871001
MEAF6	Adi-1	1.00119
SNIP1	Adi-1	0.182034
DNALI1	Adi-1	0.0315644
GNL2	Adi-1	0.31346
AL513220.1	Adi-1	0.00394229
RSPO1	Adi-1	0.0238802
C1orf109	Adi-1	2.42031
CDCA8	Adi-1	0.0129015
EPHA10	Adi-1	0.00630023
MANEAL	Adi-1	0.0113405
AL929472.3	Adi-1	0
YRDC	Adi-1	0.0255195
C1orf122	Adi-1	0.112319
MTF1	Adi-1	0.206414
AL929472.2	Adi-1	0.00157878
INPP5B	Adi-1	1.35017
SF3A3	Adi-1	0.25215
FHL3	Adi-1	0.00865262
UTP11	Adi-1	0.0621421
POU3F1	Adi-1	0.00865262
MIR3659HG	Adi-1	0.00607904
LINC02786	Adi-1	0.00157878
AL390839.1	Adi-1	0.000789703
AL390839.2	Adi-1	0
LINC01343	Adi-1	0
LINC01685	Adi-1	0.00157878
AL354702.2	Adi-1	0.00394229
RRAGC	Adi-1	4.35609
AL139260.1	Adi-1	36.3152
MYCBP	Adi-1	0.159189
GJA9	Adi-1	0.112702
RHBDL2	Adi-1	0.514773
AKIRIN1	Adi-1	0.328126
NDUFS5	Adi-1	0.206321
MACF1	Adi-1	21.5583
AL356055.1	Adi-1	0.00472889
AL442071.2	Adi-1	0.022989
AL442071.1	Adi-1	0.051511
BMP8A	Adi-1	0.0555821
PABPC4	Adi-1	3.56523
PABPC4-AS1	Adi-1	0.424627
HEYL	Adi-1	0.00977712
AL035404.2	Adi-1	0
NT5C1A	Adi-1	0.00236724
HPCAL4	Adi-1	0.000789703
PPIE	Adi-1	0.249324
BMP8B	Adi-1	0.00394229
OXCT2	Adi-1	0.00236724
BMP8B-AS1	Adi-1	0
AL033527.3	Adi-1	0
AL033527.4	Adi-1	0.00394229
LINC02811	Adi-1	0.00472889
TRIT1	Adi-1	0.501236
MYCL	Adi-1	0.000789703
AL033527.2	Adi-1	0.000789703
MFSD2A	Adi-1	0.0078691
CAP1	Adi-1	0.287712
PPT1	Adi-1	0.102738
RLF	Adi-1	4.36001
TMCO2	Adi-1	0.0102178
AL050341.2	Adi-1	0.0368722
ZMPSTE24	Adi-1	0.454038
COL9A2	Adi-1	0.0102178
SMAP2	Adi-1	1.67417
AL031985.4	Adi-1	0.00394229
ZFP69B	Adi-1	0.00708497
AL031985.3	Adi-1	0
ZFP69	Adi-1	0.0418932
AL603839.3	Adi-1	0.161027
EXO5	Adi-1	0.0319956
AL603839.1	Adi-1	0
AL603839.2	Adi-1	0
ZNF684	Adi-1	0.257607
AL356379.2	Adi-1	0.00472889
RIMS3	Adi-1	0.00708497
AL031289.2	Adi-1	0.000789703
AL031289.1	Adi-1	0.0117806
NFYC-AS1	Adi-1	0.0117806
NFYC	Adi-1	2.69612
KCNQ4	Adi-1	0.0849254
CITED4	Adi-1	0.130409
AC119677.1	Adi-1	0.00865262
AL391730.2	Adi-1	0.00708497
CTPS1	Adi-1	0.109243
SLFNL1-AS1	Adi-1	0.0848819
SLFNL1	Adi-1	0.0207532
SCMH1	Adi-1	4.95333
AC093151.8	Adi-1	0.0420105
AC093151.3	Adi-1	0.00315508
FOXO6	Adi-1	0.0109995
AC093151.2	Adi-1	0.00157878
EDN2	Adi-1	0.000789703
HIVEP3	Adi-1	14.0504
AL445933.2	Adi-1	0
AC119676.1	Adi-1	0
AL158216.1	Adi-1	0.00450735
GUCA2B	Adi-1	0
GUCA2A	Adi-1	0.00157878
FOXJ3	Adi-1	9.36
AC096540.1	Adi-1	0.000789703
RIMKLA	Adi-1	0.0123412
ZMYND12	Adi-1	0.0299958
PPCS	Adi-1	0.158207
CCDC30	Adi-1	1.29843
PPIH	Adi-1	0.161319
AC098484.4	Adi-1	0.158406
AC098484.2	Adi-1	0.00951952
YBX1	Adi-1	1.68748
CLDN19	Adi-1	0.00315508
P3H1	Adi-1	0.140289
C1orf50	Adi-1	0.0914265
AC098484.1	Adi-1	0
TMEM269	Adi-1	0.0689455
SVBP	Adi-1	0.0960994
ERMAP	Adi-1	0.527698
AL512353.1	Adi-1	0.0398317
ZNF691	Adi-1	0.0337399
SLC2A1	Adi-1	0.04232
SLC2A1-AS1	Adi-1	0.0514825
AC099795.1	Adi-1	0.00236724
FAM183A	Adi-1	0.00315508
EBNA1BP2	Adi-1	0.133716
CFAP57	Adi-1	0.0414663
TMEM125	Adi-1	0.00394229
C1orf210	Adi-1	0.00157878
TIE1	Adi-1	0.0679702
MPL	Adi-1	0.00472889
AL139289.3	Adi-1	0
AL139289.2	Adi-1	0.0797106
CDC20	Adi-1	0.00865262
ELOVL1	Adi-1	0.110191
MED8	Adi-1	0.090075
AL139289.1	Adi-1	0.00315508
SZT2	Adi-1	1.0026
SZT2-AS1	Adi-1	0.00394229
HYI	Adi-1	0.275148
HYI-AS1	Adi-1	0.0262893
PTPRF	Adi-1	22.3153
KDM4A	Adi-1	7.32159
KDM4A-AS1	Adi-1	0.653878
ST3GAL3	Adi-1	20.3179
AL451062.1	Adi-1	0.186612
ARTN	Adi-1	0.00472889
AL357079.1	Adi-1	0.019896
IPO13	Adi-1	0.0443764
AL357079.2	Adi-1	0.000789703
DPH2	Adi-1	0.0362433
ATP6V0B	Adi-1	0.0992153
B4GALT2	Adi-1	0.0412167
CCDC24	Adi-1	0.0383122
SLC6A9	Adi-1	0.00943552
AL139220.2	Adi-1	0.0177886
KLF17	Adi-1	0.00157878
KLF18	Adi-1	0
DMAP1	Adi-1	0.0879068
ERI3	Adi-1	0.973405
ERI3-IT1	Adi-1	0.000789703
RNF220	Adi-1	0.143166
TMEM53	Adi-1	0.151599
ARMH1	Adi-1	0.300313
KIF2C	Adi-1	0.0170122
AL592166.1	Adi-1	0.0203323
RPS8	Adi-1	0.979117
BEST4	Adi-1	0.00236724
PLK3	Adi-1	0.0355992
TCTEX1D4	Adi-1	0.00236724
BTBD19	Adi-1	0.059731
PTCH2	Adi-1	0.549302
EIF2B3	Adi-1	3.70519
HECTD3	Adi-1	0.271355
UROD	Adi-1	0.250236
ZSWIM5	Adi-1	2.6365
LINC01144	Adi-1	0.00157878
HPDL	Adi-1	0.000789703
MUTYH	Adi-1	0.109322
TOE1	Adi-1	0.0416798
TESK2	Adi-1	6.31997
CCDC163	Adi-1	0.0131212
MMACHC	Adi-1	0.0632876
PRDX1	Adi-1	2.4444
AKR1A1	Adi-1	0.241614
NASP	Adi-1	8.31639
CCDC17	Adi-1	0.00943552
GPBP1L1	Adi-1	2.80252
TMEM69	Adi-1	0.0842826
IPP	Adi-1	0.39449
AL604028.1	Adi-1	0.00764826
MAST2	Adi-1	1.10665
PIK3R3	Adi-1	5.34479
AL358075.1	Adi-1	0.000789703
AL358075.2	Adi-1	0.00372058
TSPAN1	Adi-1	0.00999749
P3R3URF	Adi-1	0.000789703
POMGNT1	Adi-1	0.104722
LURAP1	Adi-1	0.0409217
RAD54L	Adi-1	0.0214437
LRRC41	Adi-1	0.43894
UQCRH	Adi-1	0.520163
NSUN4	Adi-1	0.303638
FAAH	Adi-1	0.189444
LINC01398	Adi-1	0
DMBX1	Adi-1	0
TMEM275	Adi-1	0.00157878
MKNK1-AS1	Adi-1	0.0208881
KNCN	Adi-1	0.000789703
MKNK1	Adi-1	0.880481
MOB3C	Adi-1	0.0432901
ATPAF1	Adi-1	0.413493
TEX38	Adi-1	0.00394229
EFCAB14-AS1	Adi-1	0.0355992
EFCAB14	Adi-1	0.34902
CYP4B1	Adi-1	0.408268
CYP4A11	Adi-1	0.0121213
CYP4X1	Adi-1	0.705105
CYP4Z1	Adi-1	2.47511
CYP4A22-AS1	Adi-1	0.102648
CYP4A22	Adi-1	0.00157878
LINC00853	Adi-1	0
PDZK1IP1	Adi-1	0.0078691
TAL1	Adi-1	0.00450735
AL135960.1	Adi-1	0
STIL	Adi-1	0.0375516
CMPK1	Adi-1	0.753457
LINC01389	Adi-1	0.0492288
FOXE3	Adi-1	0
FOXD2-AS1	Adi-1	0.00157878
FOXD2	Adi-1	0.00157878
LINC01738	Adi-1	0
TRABD2B	Adi-1	0.165425
AL691459.1	Adi-1	0
AC096541.1	Adi-1	0
LINC02794	Adi-1	0.00372058
AL356289.1	Adi-1	0
AL109659.1	Adi-1	0.00551487
SLC5A9	Adi-1	0.00551487
AL109659.2	Adi-1	0.00394229
SPATA6	Adi-1	2.94492
AGBL4	Adi-1	33.3165
AL391844.1	Adi-1	0.000789703
BEND5	Adi-1	0.0139006
AL645507.1	Adi-1	0.00843195
AC099788.1	Adi-1	0.159187
AL590432.1	Adi-1	0.00551487
AGBL4-IT1	Adi-1	0.00236724
ELAVL4	Adi-1	0.022989
AL592182.2	Adi-1	0
AL592182.1	Adi-1	0.000789703
LINC02808	Adi-1	0.00236724
AL592182.3	Adi-1	0
DMRTA2	Adi-1	0.00157878
AL049637.2	Adi-1	0
FAF1	Adi-1	20.3168
AL049637.1	Adi-1	0.0180072
CDKN2C	Adi-1	0.539372
C1orf185	Adi-1	2.56604
LINC01562	Adi-1	0.0216615
RNF11	Adi-1	0.553744
AL162430.2	Adi-1	0.0160162
TTC39A	Adi-1	0.0404583
TTC39A-AS1	Adi-1	0.00236724
EPS15	Adi-1	10.3524
AC104170.2	Adi-1	0.0394328
AC104170.1	Adi-1	0.102751
OSBPL9	Adi-1	7.42782
NRDC	Adi-1	3.56526
AL050343.2	Adi-1	0.0139006
AL050343.3	Adi-1	0.00686396
RAB3B	Adi-1	13.3152
TXNDC12	Adi-1	0.650732
KTI12	Adi-1	0.00551487
AL445685.1	Adi-1	0.0180072
TXNDC12-AS1	Adi-1	0.00157878
BTF3L4	Adi-1	2.35353
ZFYVE9	Adi-1	2.25341
CC2D1B	Adi-1	0.26203
AL513218.1	Adi-1	0.00236724
AL513218.2	Adi-1	0.0109995
ORC1	Adi-1	0.0246147
PRPF38A	Adi-1	0.11943
TUT4	Adi-1	4.62775
AL591167.1	Adi-1	0
GPX7	Adi-1	0.0156768
SHISAL2A	Adi-1	0.00943552
COA7	Adi-1	0.224649
ZYG11B	Adi-1	1.97142
ZYG11A	Adi-1	0.0256022
AC099677.4	Adi-1	0
ECHDC2	Adi-1	10.6386
SCP2	Adi-1	9.95242
PODN	Adi-1	0.0745768
AL445183.1	Adi-1	0.00236724
SLC1A7	Adi-1	0.00921503
AL445183.2	Adi-1	0
CPT2	Adi-1	0.172845
AL606760.2	Adi-1	0.0408857
CZIB	Adi-1	0.0973797
AL606760.3	Adi-1	0.00315508
MAGOH	Adi-1	0.208988
AL606760.1	Adi-1	0.0110834
LRP8	Adi-1	0.0195579
AL355483.3	Adi-1	0
AL355483.1	Adi-1	0.00157878
AL355483.2	Adi-1	0.000789703
LINC01771	Adi-1	0.00315508
AC119428.2	Adi-1	0.000789703
AC119428.1	Adi-1	0
LINC02812	Adi-1	0
DMRTB1	Adi-1	0
GLIS1	Adi-1	1.03978
NDC1	Adi-1	0.185139
YIPF1	Adi-1	0.185807
DIO1	Adi-1	5.40028
HSPB11	Adi-1	0.411514
LRRC42	Adi-1	0.0769802
LDLRAD1	Adi-1	0.00315508
TMEM59	Adi-1	0.811765
TCEANC2	Adi-1	0.145086
CDCP2	Adi-1	0.00315508
AL357673.2	Adi-1	0
CYB5RL	Adi-1	0.0831121
MRPL37	Adi-1	0.0892268
SSBP3	Adi-1	4.46324
SSBP3-AS1	Adi-1	0.00529351
AL161644.1	Adi-1	0
AL035415.1	Adi-1	0.000789703
AC099796.2	Adi-1	0.00372058
LINC02784	Adi-1	0
ACOT11	Adi-1	0.148344
FAM151A	Adi-1	0.00921503
AL590093.1	Adi-1	0.000789703
MROH7	Adi-1	0.0664929
TTC4	Adi-1	0.2484
PARS2	Adi-1	0.00630023
TTC22	Adi-1	0.00999749
AC096536.1	Adi-1	0
LEXM	Adi-1	0.00843195
DHCR24	Adi-1	0.120999
AC096536.3	Adi-1	0.45667
AC096536.2	Adi-1	0
DHCR24-DT	Adi-1	0
AL590440.2	Adi-1	0.00157878
TMEM61	Adi-1	0.00157878
AL590440.1	Adi-1	0.00236724
BSND	Adi-1	0.00394229
PCSK9	Adi-1	0.00551487
USP24	Adi-1	36.3219
MIR4422HG	Adi-1	0.0164542
AL603840.1	Adi-1	8.31569
LINC01755	Adi-1	0
LINC01753	Adi-1	0.00157878
AL353681.1	Adi-1	0
AC119674.1	Adi-1	3.07523
LINC01767	Adi-1	0.000789703
PLPP3	Adi-1	26.4421
PRKAA2	Adi-1	0.615961
FYB2	Adi-1	0.0749407
AL360295.1	Adi-1	0
C8A	Adi-1	0.00236724
C8B	Adi-1	0.00236724
AL161740.1	Adi-1	0
DAB1	Adi-1	4.7168
AL390243.1	Adi-1	0
DAB1-AS1	Adi-1	0.000789703
AL445193.2	Adi-1	0.00236724
OMA1	Adi-1	0.128725
AL035411.3	Adi-1	0.00843195
TACSTD2	Adi-1	0.048805
MYSM1	Adi-1	7.3181
AL136985.3	Adi-1	0.0511402
JUN	Adi-1	19.3182
LINC01135	Adi-1	0.283224
AL136985.2	Adi-1	0
AL136985.1	Adi-1	0.00943552
LINC02777	Adi-1	0.0146794
LINC01358	Adi-1	0.0431941
AL592431.2	Adi-1	0
AL592431.1	Adi-1	0.00394229
AC093425.1	Adi-1	0.0421879
AC093424.1	Adi-1	0.000789703
FGGY	Adi-1	2.70142
AL035416.1	Adi-1	0.00999749
HOOK1	Adi-1	0.444788
CYP2J2	Adi-1	0.00551487
C1orf87	Adi-1	0.00472889
LINC02778	Adi-1	0.00236724
LINC01748	Adi-1	0.0115606
AC099792.1	Adi-1	0.0193396
NFIA	Adi-1	50.3192
NFIA-AS2	Adi-1	0.040672
NFIA-AS1	Adi-1	0.0131212
AC099791.3	Adi-1	0.00843195
AC099791.4	Adi-1	0.00529351
TM2D1	Adi-1	1.11081
AC099791.2	Adi-1	0.0447062
PATJ	Adi-1	9.55659
L1TD1	Adi-1	0.017231
KANK4	Adi-1	12.329
USP1	Adi-1	0.119538
DOCK7	Adi-1	6.62114
ANGPTL3	Adi-1	0.0227715
AC103923.1	Adi-1	0.0185644
ATG4C	Adi-1	0.561624
AC099794.1	Adi-1	0.000789703
LINC01739	Adi-1	0.00607904
AL162400.3	Adi-1	0.000789703
AL162400.1	Adi-1	0
AL162400.2	Adi-1	0
AC096543.1	Adi-1	0.00157878
LINC00466	Adi-1	0.022989
AC096543.2	Adi-1	0
FOXD3-AS1	Adi-1	0.000789703
FOXD3	Adi-1	0
ALG6	Adi-1	0.307493
ITGB3BP	Adi-1	2.5835
BX004807.1	Adi-1	0.0538755
EFCAB7	Adi-1	0.212994
DLEU2L	Adi-1	0.0156768
PGM1	Adi-1	16.3161
ROR1	Adi-1	14.3154
ROR1-AS1	Adi-1	0.0355992
AL445205.1	Adi-1	0.000789703
UBE2U	Adi-1	0.00843195
CACHD1	Adi-1	34.3152
RAVER2	Adi-1	0.289592
JAK1	Adi-1	17.4559
LINC01359	Adi-1	0.115687
AL357078.2	Adi-1	0.0107793
AK4	Adi-1	1.99222
DNAJC6	Adi-1	0.0945221
AL139294.1	Adi-1	0.0162352
LEPROT	Adi-1	0.351403
LEPR	Adi-1	5.95356
AC119800.1	Adi-1	0.000789703
AL513493.1	Adi-1	0.000789703
PDE4B	Adi-1	23.3152
AL590783.1	Adi-1	0.00315508
SGIP1	Adi-1	0.378873
AL139147.1	Adi-1	0.0123412
TCTEX1D1	Adi-1	0.00607904
INSL5	Adi-1	0
WDR78	Adi-1	0.70857
AL592161.1	Adi-1	0
MIER1	Adi-1	1.32714
SLC35D1	Adi-1	0.830532
C1orf141	Adi-1	0.0180072
AL133320.2	Adi-1	0.000789703
IL23R	Adi-1	0.0139006
IL12RB2	Adi-1	0.10414
SERBP1	Adi-1	0.883244
LINC01702	Adi-1	0
GADD45A	Adi-1	0.250494
GNG12	Adi-1	2.29043
GNG12-AS1	Adi-1	2.84173
DIRAS3	Adi-1	0.0240975
WLS	Adi-1	2.82696
RPE65	Adi-1	0.000789703
DEPDC1	Adi-1	0.00157878
AL138789.1	Adi-1	0
DEPDC1-AS1	Adi-1	0.00315508
AL035412.1	Adi-1	0
AL033530.1	Adi-1	0.0307622
AL691520.1	Adi-1	0.00708497
LINC01707	Adi-1	0.0144601
LINC02791	Adi-1	0.00157878
LINC01758	Adi-1	0
AL359894.1	Adi-1	0.00394229
LRRC7	Adi-1	0.0958542
AL117353.1	Adi-1	0
AL158840.1	Adi-1	0
LRRC40	Adi-1	1.23418
SRSF11	Adi-1	11.7757
AL353771.1	Adi-1	0.0170956
ANKRD13C	Adi-1	2.66189
HHLA3	Adi-1	0.0598179
AL158839.1	Adi-1	0
CTH	Adi-1	17.3152
AL354872.2	Adi-1	0.00236724
LINC01788	Adi-1	4.32865
AL513285.1	Adi-1	0.000789703
PTGER3	Adi-1	59.3152
AL031429.1	Adi-1	0.0536955
AL031429.2	Adi-1	0.0260725
ZRANB2-AS1	Adi-1	0.161416
ZRANB2	Adi-1	7.46964
ZRANB2-AS2	Adi-1	8.64396
NEGR1	Adi-1	22.3824
AL354949.1	Adi-1	0.00315508
NEGR1-IT1	Adi-1	0
AL513166.1	Adi-1	0.534303
AL583808.1	Adi-1	0.0255195
LINC02796	Adi-1	0.00236724
LINC02797	Adi-1	0.00472889
LINC01360	Adi-1	0.00157878
LINC02238	Adi-1	0.00551487
AL591463.1	Adi-1	7.32004
LRRIQ3	Adi-1	7.38885
FPGT	Adi-1	1.29202
TNNI3K	Adi-1	0.748633
AC093158.1	Adi-1	0.0525243
AC105271.1	Adi-1	0.00157878
LRRC53	Adi-1	0.0113405
ERICH3	Adi-1	0.0312593
ERICH3-AS1	Adi-1	0.00236724
AC135803.1	Adi-1	0.00551487
CRYZ	Adi-1	0.209315
TYW3	Adi-1	0.215379
AC133865.1	Adi-1	0
AC099786.3	Adi-1	0
AC099786.1	Adi-1	0
LHX8	Adi-1	0.000789703
AC099786.2	Adi-1	0
SLC44A5	Adi-1	0.0673904
ACADM	Adi-1	1.70556
RABGGTB	Adi-1	0.267111
MSH4	Adi-1	0.315062
ASB17	Adi-1	0.00708497
AC092813.1	Adi-1	0.0375006
AC092813.2	Adi-1	0.00293319
ST6GALNAC3	Adi-1	29.3152
AC104458.1	Adi-1	0
LINC02567	Adi-1	0.000789703
ST6GALNAC5	Adi-1	0.0964984
AL035409.1	Adi-1	0.00315508
PIGK	Adi-1	0.745706
AC093433.2	Adi-1	0.00157878
AK5	Adi-1	16.3334
AC095030.1	Adi-1	0.00315508
AC093575.1	Adi-1	0.00315508
AC118549.1	Adi-1	8.06149
USP33	Adi-1	27.3153
MIGA1	Adi-1	1.50426
NEXN-AS1	Adi-1	0.0553076
NEXN	Adi-1	2.83595
FUBP1	Adi-1	1.66437
DNAJB4	Adi-1	0.173005
GIPC2	Adi-1	0.570322
AC103591.3	Adi-1	9.31547
AC103591.4	Adi-1	0.0165745
AC096531.2	Adi-1	0.00472889
PTGFR	Adi-1	0.0386896
IFI44L	Adi-1	0.083091
IFI44	Adi-1	0.184251
ADGRL4	Adi-1	13.3334
AL353651.2	Adi-1	0
AL353651.1	Adi-1	0
LINC02792	Adi-1	0.00472889
AC099671.1	Adi-1	0.00394229
AC098657.2	Adi-1	0
AL606519.1	Adi-1	0
AL136234.1	Adi-1	0.00472889
LINC01781	Adi-1	0.00394229
AC093154.1	Adi-1	0
ADGRL2	Adi-1	9.80404
AL138799.2	Adi-1	0
AL138799.4	Adi-1	0.00236724
AC117944.1	Adi-1	0.00630023
AL157944.1	Adi-1	0.14129
LINC01362	Adi-1	0.0540579
LINC01361	Adi-1	0.00157878
AC116099.1	Adi-1	0.00394229
LINC01712	Adi-1	0.000789703
LINC01725	Adi-1	3.4251
AL035706.1	Adi-1	0.00157878
TTLL7	Adi-1	5.55921
TTLL7-IT1	Adi-1	0.0203323
AC104454.2	Adi-1	0
AL359504.2	Adi-1	0.15822
PRKACB	Adi-1	8.33511
SAMD13	Adi-1	0.0285952
DNASE2B	Adi-1	0
AL844170.1	Adi-1	0.00236724
RPF1	Adi-1	0.182694
GNG5	Adi-1	0.218028
SPATA1	Adi-1	0.300629
CTBS	Adi-1	0.303254
AL359762.1	Adi-1	0.00551487
AL359762.2	Adi-1	0.000789703
LINC01555	Adi-1	0.00157878
SSX2IP	Adi-1	0.0808135
AC104169.1	Adi-1	0
LPAR3	Adi-1	0.0215267
MCOLN2	Adi-1	0.0322932
WDR63	Adi-1	0.0459677
MCOLN3	Adi-1	0.114849
SYDE2	Adi-1	0.325717
C1orf52	Adi-1	1.26321
BCL10	Adi-1	0.0456741
AL078459.1	Adi-1	0.313393
DDAH1	Adi-1	5.32776
AL360219.1	Adi-1	0.000789703
AC092807.3	Adi-1	0.0141201
AC092807.2	Adi-1	0.00315508
CCN1	Adi-1	17.3638
AC092807.1	Adi-1	0
ZNHIT6	Adi-1	0.918786
COL24A1	Adi-1	7.33617
LINC02795	Adi-1	0.084944
ODF2L	Adi-1	57.3152
CLCA2	Adi-1	0.0144601
CLCA1	Adi-1	0.00372058
CLCA4	Adi-1	0.00394229
CLCA4-AS1	Adi-1	0.674851
AL049597.2	Adi-1	0.022989
SH3GLB1	Adi-1	5.79654
AL355981.1	Adi-1	0.00157878
SELENOF	Adi-1	1.08443
HS2ST1	Adi-1	3.73031
AL121989.1	Adi-1	0.0152385
LINC01140	Adi-1	0.174734
LINC02801	Adi-1	0.00630023
LMO4	Adi-1	5.41268
LINC01364	Adi-1	0.0480523
PKN2-AS1	Adi-1	1.41638
AL445438.1	Adi-1	0.00236724
PKN2	Adi-1	11.1992
GTF2B	Adi-1	10.6425
KYAT3	Adi-1	0.684798
RBMXL1	Adi-1	0.0639494
GBP3	Adi-1	0.0523131
GBP1	Adi-1	0.0457551
GBP2	Adi-1	0.819618
AC104459.1	Adi-1	0.0177886
GBP7	Adi-1	0.0121213
GBP4	Adi-1	0.0345034
AC099063.4	Adi-1	0.00472889
GBP5	Adi-1	0.0369373
AC099063.1	Adi-1	0.00157878
GBP6	Adi-1	0.000789703
AL596214.1	Adi-1	0.0707899
LRRC8B	Adi-1	1.74995
LRRC8C-DT	Adi-1	0.294683
AC093423.2	Adi-1	0.00315508
LRRC8C	Adi-1	2.69563
AC099568.1	Adi-1	0.00157878
AC099568.2	Adi-1	0
LRRC8D	Adi-1	2.55955
AL391497.1	Adi-1	0
ZNF326	Adi-1	1.21888
AL161797.1	Adi-1	0
AC098656.1	Adi-1	0.00157878
AL627316.1	Adi-1	0.000789703
LINC02787	Adi-1	0
BARHL2	Adi-1	0
AC092805.1	Adi-1	0.000789703
LINC02609	Adi-1	0.135222
LINC02788	Adi-1	0.00630023
LINC01763	Adi-1	0
AC091614.1	Adi-1	0.00236724
ZNF644	Adi-1	6.00721
HFM1	Adi-1	0.531539
CDC7	Adi-1	0.359515
TGFBR3	Adi-1	93.3152
BRDT	Adi-1	0.0141201
EPHX4	Adi-1	0.00315508
SETSIP	Adi-1	0
BTBD8	Adi-1	1.16744
AC104836.1	Adi-1	0.00315508
C1orf146	Adi-1	0.012561
GLMN	Adi-1	3.39097
RPAP2	Adi-1	3.74888
GFI1	Adi-1	0.00551487
EVI5	Adi-1	8.39184
RPL5	Adi-1	1.02278
DIPK1A	Adi-1	8.40601
AC093577.1	Adi-1	0.0426505
MTF2	Adi-1	1.19206
TMED5	Adi-1	1.84046
CCDC18	Adi-1	17.3154
CCDC18-AS1	Adi-1	6.41976
DR1	Adi-1	0.240396
FNBP1L	Adi-1	17.3334
BCAR3	Adi-1	10.3502
AL109613.1	Adi-1	0.0494407
AL049796.1	Adi-1	0.00315508
DNTTIP2	Adi-1	0.181179
GCLM	Adi-1	7.44597
ABCA4	Adi-1	0.0385116
AC093579.1	Adi-1	0.000789703
ARHGAP29	Adi-1	9.40069
ARHGAP29-AS1	Adi-1	0.0162352
AC097059.1	Adi-1	0
AC118469.2	Adi-1	0
ABCD3	Adi-1	1.63812
F3	Adi-1	6.79413
AC093117.1	Adi-1	0
SLC44A3	Adi-1	0.118319
CNN3	Adi-1	0.934659
AC105942.1	Adi-1	0.189911
ALG14	Adi-1	0.836288
AC095033.1	Adi-1	0.00472889
TLCD4	Adi-1	29.3152
AC092802.3	Adi-1	0.00157878
AC092802.1	Adi-1	18.3177
RWDD3	Adi-1	0.341858
AC092802.2	Adi-1	0.0307622
AC092802.4	Adi-1	0.00236724
LINC01760	Adi-1	0.000789703
LINC01650	Adi-1	0
AL445218.1	Adi-1	0.00157878
LINC01761	Adi-1	0.000789703
LINC02607	Adi-1	21.372
AL683887.1	Adi-1	0.00394229
LINC02790	Adi-1	5.37385
LINC01787	Adi-1	0.0078691
PTBP2	Adi-1	10.4513
DPYD	Adi-1	27.3152
DPYD-AS1	Adi-1	0.505057
DPYD-IT1	Adi-1	0.00236724
DPYD-AS2	Adi-1	0.000789703
MIR137HG	Adi-1	0.00450735
BX005019.1	Adi-1	0
AC104453.1	Adi-1	0
LINC01776	Adi-1	0.00394229
SNX7	Adi-1	0.169212
PLPPR5	Adi-1	0.00843195
AL445433.2	Adi-1	0.0154576
PLPPR4	Adi-1	0.111232
LINC01708	Adi-1	0.0924939
PALMD	Adi-1	20.3697
FRRS1	Adi-1	0.196377
AGL	Adi-1	5.17779
AC118553.1	Adi-1	0.0129015
SLC35A3	Adi-1	2.87526
MFSD14A	Adi-1	0.802206
AC093019.2	Adi-1	0.106716
SASS6	Adi-1	0.250154
TRMT13	Adi-1	0.693248
LRRC39	Adi-1	0.258109
DBT	Adi-1	0.659566
AL445928.2	Adi-1	0.111598
RTCA-AS1	Adi-1	0.177042
RTCA	Adi-1	0.557722
AC104457.2	Adi-1	0
CDC14A	Adi-1	5.32829
AL589990.1	Adi-1	0.0298163
GPR88	Adi-1	0
LINC01349	Adi-1	0.00315508
AC099670.3	Adi-1	0.000789703
VCAM1	Adi-1	0.00708497
EXTL2	Adi-1	1.15951
AC104506.1	Adi-1	0.0177886
SLC30A7	Adi-1	1.95258
DPH5	Adi-1	0.352873
AC093157.2	Adi-1	0.000789703
AC093157.1	Adi-1	0.405801
AL109741.1	Adi-1	0.000789703
S1PR1	Adi-1	0.0102178
LINC01307	Adi-1	0.00315508
LINC01709	Adi-1	0.00394229
OLFM3	Adi-1	0.0117806
AC114485.1	Adi-1	0.0109995
AC099567.1	Adi-1	0.00708497
COL11A1	Adi-1	25.3178
AC095032.2	Adi-1	0.00843195
AC095032.1	Adi-1	2.51225
RNPC3	Adi-1	10.3504
AMY2B	Adi-1	1.50853
AMY2A	Adi-1	0.00315508
AMY1A	Adi-1	0
AMY1B	Adi-1	0
AMY1C	Adi-1	0
AL591888.1	Adi-1	0.00708497
LINC01676	Adi-1	0.0133409
LINC01677	Adi-1	0.0102178
AL355306.2	Adi-1	0.0102178
LINC01661	Adi-1	0.00236724
PRMT6	Adi-1	0.0180905
NTNG1	Adi-1	0.0373372
VAV3	Adi-1	4.26797
VAV3-AS1	Adi-1	0.00686396
LINC02785	Adi-1	0.00315508
SLC25A24	Adi-1	1.5713
AL359258.2	Adi-1	0.00708497
NBPF4	Adi-1	0
AL359258.1	Adi-1	0
AL390038.1	Adi-1	0
NBPF6	Adi-1	0
FAM102B	Adi-1	0.204252
HENMT1	Adi-1	0.0402806
AL160171.1	Adi-1	0.0123412
PRPF38B	Adi-1	1.32943
FNDC7	Adi-1	0.00708497
AL591719.2	Adi-1	0
STXBP3	Adi-1	0.977479
AKNAD1	Adi-1	0.411946
SPATA42	Adi-1	0
GPSM2	Adi-1	0.315228
CLCC1	Adi-1	0.17169
WDR47	Adi-1	0.766512
TAF13	Adi-1	0.168169
AL356488.3	Adi-1	0.0170122
TMEM167B	Adi-1	0.0589582
AL356488.2	Adi-1	0.0832389
C1orf194	Adi-1	0.0134616
KIAA1324	Adi-1	3.40043
SARS	Adi-1	0.350216
CELSR2	Adi-1	0.0250489
PSRC1	Adi-1	0.00315508
MYBPHL	Adi-1	0.0607995
SORT1	Adi-1	14.6437
PSMA5	Adi-1	0.32199
SYPL2	Adi-1	0.0815646
ATXN7L2	Adi-1	0.0211061
CYB561D1	Adi-1	0.0467577
AMIGO1	Adi-1	0.00999749
GPR61	Adi-1	0.00157878
AL355310.3	Adi-1	0
GNAI3	Adi-1	1.3899
AL355310.1	Adi-1	0.00630023
GNAT2	Adi-1	0.00157878
AMPD2	Adi-1	0.0337399
AL355310.2	Adi-1	0.000789703
GSTM4	Adi-1	0.136685
GSTM2	Adi-1	0.257132
GSTM1	Adi-1	0.00551487
AC000032.1	Adi-1	0.0365759
GSTM5	Adi-1	0.0322932
AL158847.1	Adi-1	0.000789703
GSTM3	Adi-1	0.072417
EPS8L3	Adi-1	0.00450735
LINC01768	Adi-1	0.0521823
AL450468.1	Adi-1	0.000789703
AL450468.2	Adi-1	0
CSF1	Adi-1	0.362936
AHCYL1	Adi-1	2.27234
STRIP1	Adi-1	0.242314
AL160006.1	Adi-1	0.0222167
ALX3	Adi-1	0.00157878
LINC01397	Adi-1	0.0262893
UBL4B	Adi-1	0.00157878
SLC6A17	Adi-1	0.00236724
AL355990.1	Adi-1	0
AL355990.2	Adi-1	0
LINC02586	Adi-1	0.000789703
KCNC4	Adi-1	0.0587484
RBM15-AS1	Adi-1	0.0422239
RBM15	Adi-1	0.368388
LAMTOR5-AS1	Adi-1	1.8581
SLC16A4	Adi-1	0.215903
AL355488.1	Adi-1	0.112991
LAMTOR5	Adi-1	0.120075
PROK1	Adi-1	0.00157878
AL358215.1	Adi-1	0
AL358215.2	Adi-1	0
CYMP-AS1	Adi-1	0
KCNA10	Adi-1	0
KCNA2	Adi-1	0.0310144
AL365361.1	Adi-1	0.00742737
KCNA3	Adi-1	0
CD53	Adi-1	0.0646687
AL360270.2	Adi-1	0.00865262
AL360270.1	Adi-1	0.0139006
LRIF1	Adi-1	0.211925
AL360270.3	Adi-1	0.00157878
DRAM2	Adi-1	4.361
CEPT1	Adi-1	14.3171
AL355816.1	Adi-1	0.00865262
AL355816.2	Adi-1	0.0331911
DENND2D	Adi-1	0.132796
CHI3L2	Adi-1	0.0256022
CHIA	Adi-1	0.171762
AL356387.1	Adi-1	0.00236724
PIFO	Adi-1	0.00315508
OVGP1	Adi-1	0.0117806
AL390195.2	Adi-1	0.00394229
AL390195.1	Adi-1	0.0156768
WDR77	Adi-1	0.114818
ATP5PB	Adi-1	0.251745
C1orf162	Adi-1	0.0399132
TMIGD3	Adi-1	0.00999749
ADORA3	Adi-1	0
RAP1A	Adi-1	2.80907
LINC01160	Adi-1	0.00236724
INKA2	Adi-1	0.303981
INKA2-AS1	Adi-1	0.0177886
AL049557.1	Adi-1	0
DDX20	Adi-1	0.0641581
KCND3	Adi-1	0.718904
KCND3-IT1	Adi-1	0.000789703
KCND3-AS1	Adi-1	0
LINC01750	Adi-1	0.00472889
AL445426.1	Adi-1	15.3815
CTTNBP2NL	Adi-1	0.260979
WNT2B	Adi-1	0.109546
AL354760.1	Adi-1	0.00551487
ST7L	Adi-1	1.87042
CAPZA1	Adi-1	2.79616
MOV10	Adi-1	0.128366
AL603832.1	Adi-1	0.00157878
RHOC	Adi-1	0.0602018
PPM1J	Adi-1	0.000789703
AL603832.2	Adi-1	0.00157878
TAFA3	Adi-1	0.000789703
LINC01356	Adi-1	0.00865262
LINC01357	Adi-1	0.0117806
SLC16A1	Adi-1	1.30312
SLC16A1-AS1	Adi-1	3.17715
AL390242.1	Adi-1	2.4157
LRIG2-DT	Adi-1	0.441796
LRIG2	Adi-1	1.32935
MAGI3	Adi-1	23.3152
PHTF1	Adi-1	0.63942
RSBN1	Adi-1	0.676231
AL137856.1	Adi-1	0.0264085
PTPN22	Adi-1	0.140165
AP4B1-AS1	Adi-1	0.0516939
BCL2L15	Adi-1	0.01757
AP4B1	Adi-1	0.134688
DCLRE1B	Adi-1	0.0167934
HIPK1-AS1	Adi-1	0.0162352
HIPK1	Adi-1	10.3167
OLFML3	Adi-1	0.0170122
AL591742.2	Adi-1	0
SYT6	Adi-1	0.00236724
AL121999.1	Adi-1	0.00157878
TRIM33	Adi-1	2.06694
BCAS2	Adi-1	0.122413
DENND2C	Adi-1	0.75439
AMPD1	Adi-1	0.0078691
NRAS	Adi-1	0.208306
CSDE1	Adi-1	2.02275
SIKE1	Adi-1	0.157505
SYCP1	Adi-1	0.61732
TSHB	Adi-1	0.000789703
TSPAN2	Adi-1	0.0593632
LINC01765	Adi-1	0.00157878
AL049825.1	Adi-1	0.00236724
NGF-AS1	Adi-1	3.42978
NGF	Adi-1	0.163786
AL512638.3	Adi-1	0.00315508
VANGL1	Adi-1	0.100396
CASQ2	Adi-1	0.168548
NHLH2	Adi-1	0
LINC01649	Adi-1	0.00450735
SLC22A15	Adi-1	0.058979
AL365318.1	Adi-1	0.00450735
MAB21L3	Adi-1	0.00921503
LINC01779	Adi-1	0
AL355538.1	Adi-1	0
ATP1A1	Adi-1	2.44782
ATP1A1-AS1	Adi-1	0.177514
LINC01762	Adi-1	0.104706
AL136376.1	Adi-1	0
AL390066.1	Adi-1	0.0256022
AL390066.2	Adi-1	0.00394229
CD58	Adi-1	0.682863
IGSF3	Adi-1	0.0319956
C1orf137	Adi-1	0.0251148
CD2	Adi-1	0.103725
AL157904.1	Adi-1	0
PTGFRN	Adi-1	0.0572574
CD101	Adi-1	0.0133409
AL445231.1	Adi-1	0.0131212
TTF2	Adi-1	0.296352
TRIM45	Adi-1	0.0517744
VTCN1	Adi-1	4.34052
LINC01525	Adi-1	0.00315508
AL358072.1	Adi-1	0.0102178
MAN1A2	Adi-1	7.93938
AL157902.1	Adi-1	0.000789703
TENT5C	Adi-1	0.03843
GDAP2	Adi-1	1.18654
WDR3	Adi-1	0.271132
SPAG17	Adi-1	20.6285
AL391557.1	Adi-1	0.00157878
TBX15	Adi-1	13.4639
AL139420.1	Adi-1	0.00157878
AL139420.2	Adi-1	0.000789703
WARS2	Adi-1	0.752839
WARS2-IT1	Adi-1	0.0336067
WARS2-AS1	Adi-1	4.31822
AL359915.1	Adi-1	0.0665371
LINC01780	Adi-1	0.00236724
HAO2	Adi-1	0.000789703
HAO2-IT1	Adi-1	0
HSD3B2	Adi-1	0
HSD3B1	Adi-1	0
LINC00622	Adi-1	0.00157878
ZNF697	Adi-1	0.0866486
PHGDH	Adi-1	0.28529
HMGCS2	Adi-1	0.093444
REG4	Adi-1	0.00157878
ADAM30	Adi-1	0.00630023
NOTCH2	Adi-1	9.33928
AC245008.1	Adi-1	0
SEC22B	Adi-1	0.950365
AC253572.1	Adi-1	0.00157878
NBPF26	Adi-1	0.682049
AC253572.2	Adi-1	2.65992
PPIAL4A	Adi-1	0
LINC00623	Adi-1	0.44643
FCGR1B	Adi-1	0.00315508
AC244453.3	Adi-1	0.0332731
AC244453.2	Adi-1	0
AC244453.1	Adi-1	0.00943552
FAM72B	Adi-1	0.00236724
SRGAP2C	Adi-1	0.189146
SRGAP2-AS1	Adi-1	0.0123412
LINC02798	Adi-1	0.259053
AL592494.1	Adi-1	0
AL592494.2	Adi-1	0
LINC01691	Adi-1	0
LINC02799	Adi-1	0
AC239800.2	Adi-1	0.0195579
LINC02591	Adi-1	0.0531932
HIST2H3PS2	Adi-1	0.0141201
AC246680.1	Adi-1	0.00236724
FAM72C	Adi-1	0.00157878
IGKV1OR1-1	Adi-1	0
LINC02802	Adi-1	0.0711255
PPIAL4E	Adi-1	0
AC246785.3	Adi-1	0.024532
NBPF15	Adi-1	0.395297
PPIAL4F	Adi-1	0
LINC01632	Adi-1	0.00236724
FP700111.1	Adi-1	0.0133409
SRGAP2B	Adi-1	0.507085
FAM72D	Adi-1	0.00157878
PPIAL4D	Adi-1	0
AC245014.3	Adi-1	1.57368
AC245014.1	Adi-1	0.00315508
NBPF20	Adi-1	0.043077
AC239860.4	Adi-1	0.00157878
GPR89A	Adi-1	0.197723
PDZK1	Adi-1	0.0422239
CD160	Adi-1	0.0225172
RNF115	Adi-1	1.8022
POLR3C	Adi-1	0.3019
NUDT17	Adi-1	0.0180072
PIAS3	Adi-1	0.129803
ANKRD35	Adi-1	0.0206702
ITGA10	Adi-1	0.0555536
AC243547.1	Adi-1	0
PEX11B	Adi-1	0.126991
RBM8A	Adi-1	5.32099
LIX1L-AS1	Adi-1	0.205638
LIX1L	Adi-1	0.350459
ANKRD34A	Adi-1	0.00630023
AC243547.2	Adi-1	0.00472889
POLR3GL	Adi-1	0.417935
TXNIP	Adi-1	26.3179
HJV	Adi-1	0.0893711
AC239799.2	Adi-1	0.991801
LINC01719	Adi-1	0.228865
NBPF10	Adi-1	0.29704
NOTCH2NLA	Adi-1	0.312429
AC239799.1	Adi-1	0.00394229
PPIAL4H	Adi-1	0.000789703
AC245407.2	Adi-1	0.168461
NBPF12	Adi-1	1.39713
AC244394.2	Adi-1	0
PRKAB2	Adi-1	0.0816916
AC242426.2	Adi-1	0.202771
FMO5	Adi-1	0.121923
CHD1L	Adi-1	0.0293627
LINC00624	Adi-1	0.137855
BCL9	Adi-1	0.238223
ACP6	Adi-1	0.257037
AC241644.1	Adi-1	0
GJA5	Adi-1	0.01757
AC241644.3	Adi-1	0
AC241644.2	Adi-1	0.00394229
GJA8	Adi-1	0.000789703
GPR89B	Adi-1	0.257754
AC239803.1	Adi-1	0.00394229
LINC02804	Adi-1	0.0078691
NBPF11	Adi-1	1.06688
LINC02805	Adi-1	0.00394229
AC239809.3	Adi-1	0.072803
LINC01731	Adi-1	0.014763
LINC01138	Adi-1	1.29101
LINC02806	Adi-1	0
AC245100.1	Adi-1	0.0170122
AC245100.6	Adi-1	0.00472889
PPIAL4G	Adi-1	0.00551487
NBPF14	Adi-1	1.13977
NOTCH2NLB	Adi-1	0.00157878
NUDT4B	Adi-1	0
PDE4DIP	Adi-1	12.3194
AC239802.1	Adi-1	0.000789703
AC239802.2	Adi-1	0.0123412
AC239804.1	Adi-1	0.0141201
NBPF9	Adi-1	0.406548
AC245297.3	Adi-1	2.63059
AC245297.2	Adi-1	0.0388221
NOTCH2NLC	Adi-1	1.07145
NBPF19	Adi-1	0.425877
PPIAL4C	Adi-1	0
AC242842.1	Adi-1	0.0170122
FCGR1A	Adi-1	0.000789703
HIST2H2BF	Adi-1	0.431032
AC243772.2	Adi-1	0.00394229
HIST2H3D	Adi-1	0.00999749
HIST2H4A	Adi-1	0.00157878
HIST2H3C	Adi-1	0
HIST2H2AA3	Adi-1	0.000789703
HIST2H2AA4	Adi-1	0.0352663
HIST2H3A	Adi-1	0
HIST2H4B	Adi-1	0.0148987
AC239868.1	Adi-1	0.0226519
HIST2H2BE	Adi-1	0.053942
HIST2H2AC	Adi-1	0.124129
HIST2H2AB	Adi-1	0.00708497
BOLA1	Adi-1	0.163921
SV2A	Adi-1	0.0107793
SF3B4	Adi-1	0.0497689
MTMR11	Adi-1	0.0187828
OTUD7B	Adi-1	3.23172
AC244033.2	Adi-1	0.142533
VPS45	Adi-1	2.33228
PLEKHO1	Adi-1	0.0496525
AC242988.2	Adi-1	0.00686396
ANP32E	Adi-1	0.097282
AC242988.1	Adi-1	0.00315508
CA14	Adi-1	0.00315508
APH1A	Adi-1	0.0354811
C1orf54	Adi-1	0.0237608
CIART	Adi-1	0.0335247
MRPS21	Adi-1	0.300627
PRPF3	Adi-1	0.942263
RPRD2	Adi-1	4.83179
TARS2	Adi-1	0.305036
ECM1	Adi-1	0.0472991
FALEC	Adi-1	0.0249662
AL356356.1	Adi-1	0.0645962
ADAMTSL4	Adi-1	0.125435
ADAMTSL4-AS1	Adi-1	18.3152
MCL1	Adi-1	14.3843
ENSA	Adi-1	0.868958
GOLPH3L	Adi-1	1.12115
HORMAD1	Adi-1	0.00999749
CTSS	Adi-1	0.0932863
CTSK	Adi-1	0.108591
ARNT	Adi-1	2.46828
CTXND2	Adi-1	0.00551487
SETDB1	Adi-1	1.14937
CERS2	Adi-1	0.101124
AL590133.2	Adi-1	0.00157878
AL590133.1	Adi-1	0.000789703
ANXA9	Adi-1	0.0167934
MINDY1	Adi-1	0.190351
PRUNE1	Adi-1	0.205875
BNIPL	Adi-1	0.0593632
C1orf56	Adi-1	0.0748764
CDC42SE1	Adi-1	0.155079
MLLT11	Adi-1	0.0078691
GABPB2	Adi-1	2.12958
AL592424.1	Adi-1	0.00157878
SEMA6C	Adi-1	0.0391899
TNFAIP8L2	Adi-1	0.000789703
SCNM1	Adi-1	0.0540579
LYSMD1	Adi-1	0.0396178
TMOD4	Adi-1	0.000789703
VPS72	Adi-1	0.127653
PIP5K1A	Adi-1	2.45493
PSMD4	Adi-1	0.278067
ZNF687-AS1	Adi-1	0.00630023
ZNF687	Adi-1	0.0334064
PI4KB	Adi-1	0.916765
AL391069.3	Adi-1	0.000789703
RFX5	Adi-1	0.0370049
AL391069.1	Adi-1	0.000789703
AL391069.2	Adi-1	0.000789703
SELENBP1	Adi-1	0.588784
PSMB4	Adi-1	0.118224
POGZ	Adi-1	5.02059
CGN	Adi-1	0.0162352
TUFT1	Adi-1	0.0874991
AL365436.2	Adi-1	0.00551487
SNX27	Adi-1	1.00707
AL391335.1	Adi-1	0.00921503
CELF3	Adi-1	0.000789703
AL589765.1	Adi-1	0.00450735
RIIAD1	Adi-1	0.000789703
AL589765.7	Adi-1	0.00394229
MRPL9	Adi-1	0.052771
OAZ3	Adi-1	0.00708497
AL589765.4	Adi-1	0.00157878
AL589765.2	Adi-1	0
AL589765.5	Adi-1	0
TDRKH	Adi-1	0.0509434
TDRKH-AS1	Adi-1	0.0180072
AL589765.6	Adi-1	0.00529351
LINGO4	Adi-1	0.000789703
RORC	Adi-1	0.069023
[truncated: 473,815+ more rows]
