# Supplementary material for: Single nuclei chromatin accessibility and transcriptomic map of breast tissues of women of diverse genetic ancestry
Source: bioRxiv preprint, doi:10.1101/2023.10.04.560911, version 1 (2023-10-06)
Supplement: Table S11 [file 560911_file21.xlsx]

## Sheet: avg_exp_cluster
Table S11: Average levels of specific mRNA in each cell cluster.
RNA.feature	RNA.group	RNA.avgExpr
MIR1302-2HG	cluster 0	0
FAM138A	cluster 0	0
OR4F5	cluster 0	0
AL627309.1	cluster 0	0.0140117
AL627309.3	cluster 0	0.000194489
AL627309.2	cluster 0	0
AL627309.5	cluster 0	0.0359111
AL627309.4	cluster 0	0.000583353
AP006222.2	cluster 0	0
AL732372.1	cluster 0	0
OR4F29	cluster 0	0
AC114498.1	cluster 0	0
OR4F16	cluster 0	0
AL669831.2	cluster 0	0.00155485
LINC01409	cluster 0	0.0907857
FAM87B	cluster 0	0.000583353
LINC01128	cluster 0	0.0692276
LINC00115	cluster 0	0.0063438
FAM41C	cluster 0	0.0147581
AL645608.6	cluster 0	0.00407634
AL645608.2	cluster 0	0.00330118
AL645608.4	cluster 0	0
LINC02593	cluster 0	0.00116637
SAMD11	cluster 0	0.00402177
NOC2L	cluster 0	0.0775019
KLHL17	cluster 0	0.0167024
PLEKHN1	cluster 0	0.0158291
PERM1	cluster 0	0.0021373
AL645608.7	cluster 0	0.00271941
HES4	cluster 0	0.0207523
ISG15	cluster 0	0.00562488
AL645608.1	cluster 0	0.0018885
AGRN	cluster 0	0.0975626
AL645608.5	cluster 0	0.000194489
AL645608.8	cluster 0	0.00038894
RNF223	cluster 0	0.000194489
C1orf159	cluster 0	0.228896
AL390719.3	cluster 0	0.00813614
LINC01342	cluster 0	0.00116637
AL390719.2	cluster 0	0.0124853
TTLL10-AS1	cluster 0	0.00136063
TTLL10	cluster 0	0.00609604
TNFRSF18	cluster 0	0.000777729
TNFRSF4	cluster 0	0.00038894
SDF4	cluster 0	0.0516077
B3GALT6	cluster 0	0.00388261
C1QTNF12	cluster 0	0.00609604
AL162741.1	cluster 0	0.00271941
UBE2J2	cluster 0	0.098935
LINC01786	cluster 0	0.0109717
SCNN1D	cluster 0	0.0137993
ACAP3	cluster 0	0.0537664
PUSL1	cluster 0	0.00363424
INTS11	cluster 0	0.100301
AL139287.1	cluster 0	0.000777729
CPTP	cluster 0	0.00271941
TAS1R3	cluster 0	0.000777729
DVL1	cluster 0	0.0299415
MXRA8	cluster 0	0.214383
AURKAIP1	cluster 0	0.0129776
CCNL2	cluster 0	0.611675
MRPL20-AS1	cluster 0	0.00485091
MRPL20	cluster 0	0.10123
AL391244.2	cluster 0	0.00252541
ANKRD65	cluster 0	0.0725322
AL391244.1	cluster 0	0.00038894
TMEM88B	cluster 0	0.000583353
LINC01770	cluster 0	0.00194319
VWA1	cluster 0	0.0322333
ATAD3C	cluster 0	0.171327
ATAD3B	cluster 0	0.0800569
ATAD3A	cluster 0	0.0371762
TMEM240	cluster 0	0.00388261
SSU72	cluster 0	0.0830665
AL645728.1	cluster 0	0.00543144
FNDC10	cluster 0	0.000972066
AL691432.4	cluster 0	0.000777729
AL691432.2	cluster 0	0.00692346
MIB2	cluster 0	0.0390723
MMP23B	cluster 0	0.00174904
CDK11B	cluster 0	0.137507
FO704657.1	cluster 0	0.0022767
SLC35E2B	cluster 0	0.159911
CDK11A	cluster 0	0.135883
SLC35E2A	cluster 0	0.111669
NADK	cluster 0	0.0817552
GNB1	cluster 0	2.83117
AL109917.1	cluster 0	0.000583353
CALML6	cluster 0	0.00330118
TMEM52	cluster 0	0.000777729
CFAP74	cluster 0	0.0533335
AL391845.2	cluster 0	0.00038894
GABRD	cluster 0	0.000972066
AL391845.1	cluster 0	0.000194489
PRKCZ	cluster 0	0.234327
AL590822.2	cluster 0	0.00474184
PRKCZ-AS1	cluster 0	0.00421548
FAAP20	cluster 0	0.0638902
AL590822.1	cluster 0	0.0142575
SKI	cluster 0	1.22393
AL590822.3	cluster 0	0.0180944
MORN1	cluster 0	0.129464
AL589739.1	cluster 0	0.000194489
AL513477.2	cluster 0	0.00194319
RER1	cluster 0	0.133379
PEX10	cluster 0	0.0248113
PLCH2	cluster 0	0.10488
AL139246.1	cluster 0	0
AL139246.4	cluster 0	0
PANK4	cluster 0	0.0153329
HES5	cluster 0	0.000583353
AL139246.5	cluster 0	0.00111163
TNFRSF14-AS1	cluster 0	0.00659149
TNFRSF14	cluster 0	0.07968
AL139246.3	cluster 0	0.00136063
PRXL2B	cluster 0	0.00485091
MMEL1	cluster 0	0.00349503
AL831784.1	cluster 0	0
TTC34	cluster 0	0.0306795
AC242022.2	cluster 0	0.000194489
AC242022.1	cluster 0	0
AL592464.2	cluster 0	0
AL592464.3	cluster 0	0
AL592464.1	cluster 0	0
AL589702.1	cluster 0	0.00038894
ACTRT2	cluster 0	0
PRDM16-DT	cluster 0	0.000194489
PRDM16	cluster 0	0.00620496
AL008733.1	cluster 0	0
AL590438.1	cluster 0	0
AL354743.2	cluster 0	0.00038894
AL354743.1	cluster 0	0
ARHGEF16	cluster 0	0.00739401
AL512413.1	cluster 0	0.000194489
MEGF6	cluster 0	0.104238
AL513320.1	cluster 0	0.000972066
TPRG1L	cluster 0	0.0124555
WRAP73	cluster 0	0.0486617
TP73	cluster 0	17.9136
AL136528.1	cluster 0	0.00252541
AL136528.2	cluster 0	0
CCDC27	cluster 0	0.0113229
SMIM1	cluster 0	0.0018885
LRRC47	cluster 0	0.0457601
AL365330.1	cluster 0	0.00038894
CEP104	cluster 0	0.284266
DFFB	cluster 0	0.679722
C1orf174	cluster 0	0.0565705
LINC01134	cluster 0	0.00427004
LINC01346	cluster 0	0.000583353
LINC01345	cluster 0	0.000194489
LINC02780	cluster 0	0.00155485
AL805961.1	cluster 0	0.00038894
LINC01777	cluster 0	0.00038894
AL355602.1	cluster 0	0
Z98747.1	cluster 0	0
LINC01646	cluster 0	0.000194489
AJAP1	cluster 0	0.0858713
Z98886.1	cluster 0	0.00116637
BX005132.1	cluster 0	0
LINC02781	cluster 0	0.000194489
LINC02782	cluster 0	0.000194489
AL139823.1	cluster 0	0.000194489
Z98259.3	cluster 0	0.000194489
Z98259.2	cluster 0	0
Z98259.1	cluster 0	0.000583353
AL365255.1	cluster 0	0.00233137
NPHP4	cluster 0	0.21616
KCNAB2	cluster 0	0.041006
CHD5	cluster 0	0.00981676
RPL22	cluster 0	0.201127
AL031847.1	cluster 0	0
RNF207	cluster 0	0.0512235
ICMT	cluster 0	0.0160449
LINC00337	cluster 0	16.9136
HES3	cluster 0	0
GPR153	cluster 0	0.0177661
ACOT7	cluster 0	0.184156
AL031848.2	cluster 0	0.00291337
HES2	cluster 0	0.00363424
ESPN	cluster 0	0.00750279
AL031848.1	cluster 0	0.00038894
TNFRSF25	cluster 0	0.0953246
PLEKHG5	cluster 0	0.0699204
NOL9	cluster 0	0.216891
TAS1R1	cluster 0	0.0616453
ZBTB48	cluster 0	0.0526956
KLHL21	cluster 0	0.198419
PHF13	cluster 0	0.0482172
THAP3	cluster 0	0.033518
DNAJC11	cluster 0	0.250779
LINC01672	cluster 0	0.000777729
AL591163.1	cluster 0	0.00116637
CAMTA1-DT	cluster 0	0.0134696
CAMTA1	cluster 0	17.914
AL512330.1	cluster 0	0.00150014
CAMTA1-IT1	cluster 0	0
Z97987.1	cluster 0	0.000583353
AL365194.1	cluster 0	0
AL359881.3	cluster 0	0.000194489
AL359881.2	cluster 0	0.000194489
AL359881.1	cluster 0	0.00155485
VAMP3	cluster 0	0.061304
Z98884.2	cluster 0	0.000583353
PER3	cluster 0	15.9136
Z98884.1	cluster 0	0.0272178
UTS2	cluster 0	0.00741474
TNFRSF9	cluster 0	0.00116637
PARK7	cluster 0	0.127666
AL034417.4	cluster 0	0.0309725
AL034417.3	cluster 0	0.0275963
ERRFI1	cluster 0	0.917989
AL034417.2	cluster 0	0.0319823
LINC01714	cluster 0	0.00038894
AL358876.2	cluster 0	0
SLC45A1	cluster 0	0.0247872
RERE	cluster 0	28.9138
RERE-AS1	cluster 0	0.00893742
AL357552.2	cluster 0	0.000972066
ENO1	cluster 0	2.36631
ENO1-AS1	cluster 0	0.0018885
CA6	cluster 0	0.275713
SLC2A7	cluster 0	0.00174904
SLC2A5	cluster 0	0.0219574
GPR157	cluster 0	0.110848
MIR34AHG	cluster 0	0.208457
LNCTAM34A	cluster 0	0.0523299
H6PD	cluster 0	0.108934
SPSB1	cluster 0	0.204633
BX323043.1	cluster 0	0
LINC02606	cluster 0	0.00518346
AL928921.1	cluster 0	0
SLC25A33	cluster 0	14.9146
TMEM201	cluster 0	0.0187748
PIK3CD	cluster 0	0.0959934
PIK3CD-AS1	cluster 0	0
PIK3CD-AS2	cluster 0	0.0130614
CLSTN1	cluster 0	0.871424
CTNNBIP1	cluster 0	0.340624
AL357140.1	cluster 0	0.000777729
AL357140.4	cluster 0	0.00653706
LZIC	cluster 0	0.0846056
AL357140.2	cluster 0	0.000194489
NMNAT1	cluster 0	0.0818367
AL603962.1	cluster 0	0
RBP7	cluster 0	0.0545716
UBE4B	cluster 0	3.25496
KIF1B	cluster 0	5.34331
AL139424.3	cluster 0	0.0108707
AL139424.2	cluster 0	0.00485091
PGD	cluster 0	0.144943
AL139424.1	cluster 0	0
CENPS	cluster 0	0.0109717
CORT	cluster 0	0.00266476
DFFA	cluster 0	0.122309
AL354956.1	cluster 0	0.00038894
PEX14	cluster 0	1.43201
AL139423.2	cluster 0	0.00581827
CASZ1	cluster 0	0.382442
AL139423.1	cluster 0	0.0104784
C1orf127	cluster 0	0.00174904
TARDBP	cluster 0	0.293332
MASP2	cluster 0	0.017022
AL109811.2	cluster 0	0.0383475
SRM	cluster 0	0.0966458
EXOSC10	cluster 0	0.44377
AL109811.1	cluster 0	0.158233
EXOSC10-AS1	cluster 0	0.0044637
MTOR	cluster 0	1.24679
MTOR-AS1	cluster 0	0.0126846
ANGPTL7	cluster 0	0.00291337
UBIAD1	cluster 0	0.0389379
AL031291.1	cluster 0	0.00474184
DISP3	cluster 0	0.0107549
AL590989.1	cluster 0	0.000194489
LINC01647	cluster 0	0
AL031731.1	cluster 0	0.0105869
FBXO2	cluster 0	0.0460594
FBXO44	cluster 0	0.0628607
FBXO6	cluster 0	0.0174134
MAD2L2	cluster 0	0.0176584
DRAXIN	cluster 0	0.00822036
AGTRAP	cluster 0	0.024568
C1orf167	cluster 0	0.0067847
AL953897.1	cluster 0	0
MTHFR	cluster 0	0.0801005
CLCN6	cluster 0	0.141506
NPPA	cluster 0	0.00678093
NPPB	cluster 0	0.000194489
AL021155.5	cluster 0	4.92627
KIAA2013	cluster 0	0.043264
PLOD1	cluster 0	0.186189
AL096840.2	cluster 0	0.00136063
MFN2	cluster 0	0.165136
MIIP	cluster 0	0.0348297
TNFRSF8	cluster 0	0.123077
AL357835.1	cluster 0	0
TNFRSF1B	cluster 0	0.0122093
VPS13D	cluster 0	5.67653
LINC02766	cluster 0	0.000194489
DHRS3	cluster 0	1.14887
AC254633.1	cluster 0	0.00038894
AADACL4	cluster 0	0
AADACL3	cluster 0	0
C1orf158	cluster 0	0.000972066
PRAMEF12	cluster 0	0
PRAMEF1	cluster 0	0
LINC01784	cluster 0	0
PRAMEF11	cluster 0	0
HNRNPCL1	cluster 0	0
PRAMEF2	cluster 0	0
PRAMEF4	cluster 0	0
PRAMEF10	cluster 0	0
PRAMEF7	cluster 0	0
PRAMEF6	cluster 0	0
PRAMEF27	cluster 0	0
HNRNPCL3	cluster 0	0
PRAMEF25	cluster 0	0
HNRNPCL2	cluster 0	0
AC245056.1	cluster 0	0
PRAMEF26	cluster 0	0
HNRNPCL4	cluster 0	0
PRAMEF9	cluster 0	0.000194489
PRAMEF13	cluster 0	0
PRAMEF18	cluster 0	0.000194489
PRAMEF5	cluster 0	0
PRAMEF8	cluster 0	0
PRAMEF33	cluster 0	0.000194489
PRAMEF15	cluster 0	0.000194489
AC243961.1	cluster 0	0
PRAMEF14	cluster 0	0.000194489
PRAMEF19	cluster 0	0.000194489
PRAMEF17	cluster 0	0
PRAMEF20	cluster 0	0.000194489
LRRC38	cluster 0	0.00291337
AL354712.1	cluster 0	0
PDPN	cluster 0	0.103797
AL359771.1	cluster 0	0.00038894
PRDM2	cluster 0	3.05696
KAZN	cluster 0	30.9137
AL357873.1	cluster 0	0.0101141
KAZN-AS1	cluster 0	0.0135946
AL031293.1	cluster 0	0.0084883
TMEM51-AS1	cluster 0	0.0438349
TMEM51	cluster 0	0.430105
C1orf195	cluster 0	0.00465732
FHAD1	cluster 0	0.185361
AL031283.2	cluster 0	0.00310729
AL031283.3	cluster 0	0
AL031283.1	cluster 0	0.000194489
EFHD2	cluster 0	0.0142126
CTRC	cluster 0	0.00155485
CELA2A	cluster 0	0.000777729
CELA2B	cluster 0	0.00750279
CASP9	cluster 0	0.0711464
DNAJC16	cluster 0	0.270128
AL121992.3	cluster 0	0.000777729
AGMAT	cluster 0	0.0144584
AL121992.1	cluster 0	0.0130614
DDI2	cluster 0	0.345862
RSC1A1	cluster 0	0
AL121992.2	cluster 0	0
PLEKHM2	cluster 0	0.18192
AL450998.3	cluster 0	0.00662141
SLC25A34	cluster 0	0.0217081
SLC25A34-AS1	cluster 0	0.00208262
TMEM82	cluster 0	0.00700779
FBLIM1	cluster 0	0.210334
UQCRHL	cluster 0	0.00948575
AL450998.2	cluster 0	0.378912
SPEN	cluster 0	5.18801
ZBTB17	cluster 0	0.0547837
SRARP	cluster 0	0.00194319
AL355994.3	cluster 0	0
HSPB7	cluster 0	0.00324656
CLCNKA	cluster 0	0.00155485
CLCNKB	cluster 0	0.00174904
FAM131C	cluster 0	0.000972066
EPHA2	cluster 0	0.0243782
AL451042.2	cluster 0	0.000583353
AL451042.1	cluster 0	0.00266476
ARHGEF19-AS1	cluster 0	0
ARHGEF19	cluster 0	0.0330685
AL109627.1	cluster 0	0.00155485
CPLANE2	cluster 0	0.0067847
FBXO42	cluster 0	1.89938
SZRD1	cluster 0	0.16005
SPATA21	cluster 0	0.0423574
NECAP2	cluster 0	0.0868894
LINC01772	cluster 0	0.0271149
AL137802.2	cluster 0	0.00970823
AL137802.1	cluster 0	0.000194489
LINC01783	cluster 0	0.00330118
NBPF1	cluster 0	0.171685
AL137798.1	cluster 0	0.00038894
AL137798.2	cluster 0	0.00116637
AL021920.1	cluster 0	0
AL021920.3	cluster 0	0.00150014
CROCC	cluster 0	9.97257
BX284668.1	cluster 0	0.00038894
BX284668.2	cluster 0	0.00116637
BX284668.5	cluster 0	0.00827471
BX284668.6	cluster 0	0.00653706
MFAP2	cluster 0	0.00291337
AL049569.2	cluster 0	0.000583353
AL049569.1	cluster 0	0.0188339
ATP13A2	cluster 0	0.0472742
SDHB	cluster 0	0.331605
PADI2	cluster 0	0.207587
LINC02783	cluster 0	0.000777729
AL590644.1	cluster 0	0
PADI1	cluster 0	0.00409714
PADI3	cluster 0	0.00271941
PADI4	cluster 0	0.00692346
PADI6	cluster 0	0.00623489
RCC2-AS1	cluster 0	0
RCC2	cluster 0	0.213584
ARHGEF10L	cluster 0	1.00409
LINC02810	cluster 0	0.0086903
ACTL8	cluster 0	0.00299803
AL357509.1	cluster 0	0.000777729
LINC01654	cluster 0	0.000194489
IGSF21	cluster 0	0.00562488
IGSF21-AS1	cluster 0	0.000194489
AL591896.1	cluster 0	0
KLHDC7A	cluster 0	0.000722973
PAX7	cluster 0	0.00523797
TAS1R2	cluster 0	0.00443913
ALDH4A1	cluster 0	0.0493761
IFFO2	cluster 0	3.86287
AL137127.1	cluster 0	0.00271941
UBR4	cluster 0	1.21023
EMC1-AS1	cluster 0	0.157331
EMC1	cluster 0	0.0837142
MRTO4	cluster 0	0.05389
AKR7A3	cluster 0	0.00692346
AKR7A2	cluster 0	0.0297234
SLC66A1	cluster 0	0.0153329
CAPZB	cluster 0	3.32843
MICOS10	cluster 0	0.177771
AL031727.2	cluster 0	0.000777729
NBL1	cluster 0	0.0571695
HTR6	cluster 0	0.00291337
TMCO4	cluster 0	0.188548
RNF186	cluster 0	0.00038894
AL391883.1	cluster 0	0.00038894
OTUD3	cluster 0	0.126279
PLA2G2E	cluster 0	0
PLA2G2A	cluster 0	0.00136063
PLA2G5	cluster 0	0.00653706
PLA2G2D	cluster 0	0.00038894
PLA2G2F	cluster 0	0.00038894
Z98257.1	cluster 0	0.00038894
PLA2G2C	cluster 0	0.00835892
UBXN10-AS1	cluster 0	0.00155485
UBXN10	cluster 0	0.00736411
LINC01757	cluster 0	0
Z98257.2	cluster 0	0.000194489
VWA5B1	cluster 0	0.000972066
AL020998.1	cluster 0	0.00038894
LINC01141	cluster 0	0.0021373
AL139254.1	cluster 0	0
AL139254.2	cluster 0	0.000583353
AL139254.3	cluster 0	0.00324656
CAMK2N1	cluster 0	0.0842579
MUL1	cluster 0	0.0162659
FAM43B	cluster 0	0
CDA	cluster 0	0.00233137
PINK1	cluster 0	0.037127
PINK1-AS	cluster 0	0.024568
DDOST	cluster 0	0.049099
KIF17	cluster 0	0.0313138
SH2D5	cluster 0	0.00194319
AL663074.1	cluster 0	0.000722973
HP1BP3	cluster 0	2.7353
EIF4G3	cluster 0	17.0244
AL031005.2	cluster 0	0.000583353
ECE1	cluster 0	1.83226
AL031005.1	cluster 0	0.000194489
AL031728.1	cluster 0	0.00501071
AL592309.2	cluster 0	0
NBPF3	cluster 0	0.201646
ALPL	cluster 0	0.419028
LINC02596	cluster 0	0.00570931
RAP1GAP	cluster 0	26.9136
USP48	cluster 0	2.01239
LDLRAD2	cluster 0	0.0160449
HSPG2	cluster 0	0.853947
CELA3B	cluster 0	0.00116637
CELA3A	cluster 0	0.00038894
LINC01635	cluster 0	0.000777729
LINC00339	cluster 0	0.0125096
CDC42	cluster 0	0.557068
CDC42-AS1	cluster 0	0.0118791
CDC42-IT1	cluster 0	0.0131695
WNT4	cluster 0	0.0299504
AL445253.1	cluster 0	0.0162362
ZBTB40	cluster 0	0.192648
ZBTB40-IT1	cluster 0	0.000194489
EPHA8	cluster 0	0.0018885
C1QA	cluster 0	0.00631009
C1QC	cluster 0	0.00174904
C1QB	cluster 0	0.00271941
EPHB2	cluster 0	0.0683575
AL512444.1	cluster 0	0
LACTBL1	cluster 0	0.000194489
TEX46	cluster 0	0.00247075
KDM1A	cluster 0	0.625961
AL031428.1	cluster 0	1.0374
LUZP1	cluster 0	15.9136
HTR1D	cluster 0	0.000722973
LINC01355	cluster 0	0.14637
AL109936.6	cluster 0	0.0269621
HNRNPR	cluster 0	1.2267
ZNF436	cluster 0	0.0286485
ZNF436-AS1	cluster 0	0.0100093
AL109936.2	cluster 0	0.000972066
TCEA3	cluster 0	0.116057
ASAP3	cluster 0	0.108972
E2F2	cluster 0	0.00136063
AL021154.1	cluster 0	0.00038894
ID3	cluster 0	0.00402177
AL450043.1	cluster 0	0.00310729
MDS2	cluster 0	0.00427004
RPL11	cluster 0	0.32293
ELOA-AS1	cluster 0	0.188493
ELOA	cluster 0	0.142531
PITHD1	cluster 0	0.113152
LYPLA2	cluster 0	0.0315125
GALE	cluster 0	0.029758
HMGCL	cluster 0	0.0958565
FUCA1	cluster 0	0.0310054
CNR2	cluster 0	0.0044637
AL590609.3	cluster 0	0.00038894
PNRC2	cluster 0	0.0699131
SRSF10	cluster 0	1.0014
AL591178.1	cluster 0	0.00673028
MYOM3	cluster 0	0.0864269
AL591178.2	cluster 0	0
IL22RA1	cluster 0	0.0429089
IFNLR1	cluster 0	0.467354
LINC02800	cluster 0	0.0021373
AL138902.1	cluster 0	0.00252541
GRHL3	cluster 0	0.00711661
STPG1	cluster 0	0.124131
NIPAL3	cluster 0	0.391561
RCAN3AS	cluster 0	0.0659395
RCAN3	cluster 0	293.914
NCMAP-DT	cluster 0	0.0152789
NCMAP	cluster 0	0.418263
SRRM1	cluster 0	0.801779
AL445648.1	cluster 0	0.00116637
CLIC4	cluster 0	101.914
RUNX3	cluster 0	0.104582
AL445471.1	cluster 0	0.00038894
AL445471.2	cluster 0	0.000194489
LINC02793	cluster 0	0
AL050344.1	cluster 0	0.000972066
AL031432.1	cluster 0	0.00155485
SYF2	cluster 0	0.138863
AL031432.4	cluster 0	0.020595
AL031432.5	cluster 0	0.00116637
RSRP1	cluster 0	4.0549
AL031432.3	cluster 0	0.00351583
RHD	cluster 0	0.0752031
TMEM50A	cluster 0	0.192439
RHCE	cluster 0	0.0173505
MACO1	cluster 0	0.424111
LDLRAP1	cluster 0	0.114685
AL606491.1	cluster 0	0.0395806
MAN1C1	cluster 0	0.323309
AL031280.1	cluster 0	0.00584822
SELENON	cluster 0	0.0423322
AL020996.1	cluster 0	0.00783446
MTFR1L	cluster 0	0.051593
AL020996.3	cluster 0	0
AUNIP	cluster 0	0.0520487
AL033528.2	cluster 0	0.00427004
PAQR7	cluster 0	0.0366376
STMN1	cluster 0	0.135496
PAFAH2	cluster 0	0.0463837
EXTL1	cluster 0	0.00562488
SLC30A2	cluster 0	0.00291337
AL391650.2	cluster 0	0.0382993
TRIM63	cluster 0	0.000777729
PDIK1L	cluster 0	0.0439166
FAM110D	cluster 0	0.000972066
C1orf232	cluster 0	0.000972066
AL391650.1	cluster 0	0.000194489
ZNF593	cluster 0	0.00764145
CNKSR1	cluster 0	0.0876522
CATSPER4	cluster 0	0.00330118
CEP85	cluster 0	0.0594397
SH3BGRL3	cluster 0	0.0169348
UBXN11	cluster 0	0.0402502
CD52	cluster 0	0.00449369
CRYBG2	cluster 0	0.00525874
ZNF683	cluster 0	0.00443913
LIN28A	cluster 0	0.00174904
DHDDS	cluster 0	1.33439
AL513365.2	cluster 0	0.0277412
HMGN2	cluster 0	0.295659
RPS6KA1	cluster 0	0.0704133
AL512408.1	cluster 0	0.00233137
ARID1A	cluster 0	3.22779
PIGV	cluster 0	0.0332806
ZDHHC18	cluster 0	0.0704535
SFN	cluster 0	0.0233216
GPN2	cluster 0	0.06656
AL034380.1	cluster 0	0.000583353
GPATCH3	cluster 0	0.0210055
NUDC	cluster 0	0.162075
NR0B2	cluster 0	0
KDF1	cluster 0	0.0168641
TRNP1	cluster 0	0.125989
TENT5B	cluster 0	0.352931
SLC9A1	cluster 0	12.9146
AL590640.1	cluster 0	0.00324656
WDTC1	cluster 0	0.543753
TMEM222	cluster 0	0.0625236
SYTL1	cluster 0	0.229533
MAP3K6	cluster 0	0.128135
FCN3	cluster 0	0.0277892
CD164L2	cluster 0	0.0385637
GPR3	cluster 0	0.000777729
WASF2	cluster 0	5.99826
FO393419.2	cluster 0	0.0070622
BX293535.1	cluster 0	0.00291337
AHDC1	cluster 0	1.48416
FGR	cluster 0	0.00518346
LINC02574	cluster 0	0
IFI6	cluster 0	0.0249235
AL445490.1	cluster 0	0.00330118
AL020997.5	cluster 0	0.00194319
FAM76A	cluster 0	0.122189
STX12	cluster 0	0.540131
AL020997.2	cluster 0	0.000777729
AL020997.3	cluster 0	0.000583353
AL020997.4	cluster 0	0.00252541
PPP1R8	cluster 0	0.136188
THEMIS2	cluster 0	0.00777092
RPA2	cluster 0	0.117342
SMPDL3B	cluster 0	0.0193231
AL512288.1	cluster 0	0.0341905
XKR8	cluster 0	0.0122634
EYA3	cluster 0	1.30828
PTAFR	cluster 0	0.0259364
DNAJC8	cluster 0	0.181827
ATP5IF1	cluster 0	0.102945
AL353622.1	cluster 0	0.00808179
AL353622.2	cluster 0	0.000777729
SESN2	cluster 0	0.682277
MED18	cluster 0	0.00808179
PHACTR4	cluster 0	5.46865
RCC1	cluster 0	9.0481
SNHG3	cluster 0	0.110069
TRNAU1AP	cluster 0	0.355901
SNHG12	cluster 0	0.233645
TAF12	cluster 0	0.139975
RAB42	cluster 0	0.652128
LINC01715	cluster 0	2.16455
AL360012.1	cluster 0	0.355961
GMEB1	cluster 0	0.212967
YTHDF2	cluster 0	0.450451
OPRD1	cluster 0	0.00576379
AL009181.1	cluster 0	0.00038894
EPB41	cluster 0	3.49468
TMEM200B	cluster 0	0.00918447
AL357500.1	cluster 0	0.00885326
SRSF4	cluster 0	2.08938
MECR	cluster 0	0.187164
AL590729.1	cluster 0	0
PTPRU	cluster 0	0.116209
LINC01756	cluster 0	0.00271941
AC092265.1	cluster 0	0
AL645944.2	cluster 0	0.00038894
LINC01648	cluster 0	0.000194489
AL137076.1	cluster 0	0
AL161638.2	cluster 0	0.000194489
AL161638.1	cluster 0	0.000194489
MATN1	cluster 0	36.9136
MATN1-AS1	cluster 0	0.00846759
AL137857.1	cluster 0	0.000583353
LAPTM5	cluster 0	0.00881964
AL137027.1	cluster 0	0.000972066
LINC01778	cluster 0	0.00310729
AL445235.1	cluster 0	0.000194489
SDC3	cluster 0	0.128965
PUM1	cluster 0	8.77665
NKAIN1	cluster 0	0.0111306
SNRNP40	cluster 0	0.432276
ZCCHC17	cluster 0	0.298306
AL451070.1	cluster 0	0.0373214
FABP3	cluster 0	0.179226
SERINC2	cluster 0	0.326882
LINC01226	cluster 0	5.93495
AC114488.1	cluster 0	0.00402177
TINAGL1	cluster 0	0.211367
HCRTR1	cluster 0	0.00926861
PEF1	cluster 0	0.02522
AC114488.2	cluster 0	0.0102019
AC114488.3	cluster 0	0.00155485
COL16A1	cluster 0	0.5494
ADGRB2	cluster 0	0.00769583
AL354919.2	cluster 0	0.000194489
SPOCD1	cluster 0	0.00557039
AL354919.1	cluster 0	0.00174904
AL136115.2	cluster 0	0.0415099
PTP4A2	cluster 0	0.268421
AL136115.1	cluster 0	0.00512894
AL136115.3	cluster 0	0.00194319
KHDRBS1	cluster 0	3.16161
AL445248.1	cluster 0	0.0804953
TMEM39B	cluster 0	0.115809
KPNA6	cluster 0	42.9136
AL049795.2	cluster 0	0.00038894
TXLNA	cluster 0	0.175789
CCDC28B	cluster 0	0.0487356
AL049795.1	cluster 0	0.00813614
IQCC	cluster 0	0.00595717
DCDC2B	cluster 0	0.0153329
TMEM234	cluster 0	0.0329864
EIF3I	cluster 0	0.0380838
FAM167B	cluster 0	0.00174904
LCK	cluster 0	0.0128694
HDAC1	cluster 0	0.223767
MARCKSL1	cluster 0	0.0637823
AL109945.1	cluster 0	0.000583353
TSSK3	cluster 0	0.0247044
FAM229A	cluster 0	0.0205209
BSDC1	cluster 0	0.200837
ZBTB8B	cluster 0	0.0215563
ZBTB8A	cluster 0	5.91686
ZBTB8OS	cluster 0	0.387561
RBBP4	cluster 0	0.574121
SYNC	cluster 0	0.11639
AC114489.1	cluster 0	0.00116637
KIAA1522	cluster 0	0.168386
YARS	cluster 0	0.26025
S100PBP	cluster 0	0.558129
FNDC5	cluster 0	0.00785517
HPCA	cluster 0	0.0021373
TMEM54	cluster 0	0.00697788
AL031602.2	cluster 0	0.0838673
RNF19B	cluster 0	1.57623
AL020995.1	cluster 0	0.0369888
AK2	cluster 0	0.138705
AZIN2	cluster 0	0.142702
TRIM62	cluster 0	0.0442689
AL662907.3	cluster 0	0.0088288
ZNF362	cluster 0	0.256934
AL513327.3	cluster 0	0.000583353
A3GALT2	cluster 0	0.0326099
AL513327.1	cluster 0	0.108677
PHC2	cluster 0	0.373856
AL513327.2	cluster 0	0.0278148
ZSCAN20	cluster 0	0.0251833
CSMD2	cluster 0	0.134125
HMGB4	cluster 0	0
CSMD2-AS1	cluster 0	0.000777729
C1orf94	cluster 0	0.000972066
AC099565.1	cluster 0	0.00208262
SMIM12	cluster 0	0.159774
GJB5	cluster 0	0.00038894
GJB4	cluster 0	0.000194489
AL121988.1	cluster 0	0
GJB3	cluster 0	0.00038894
GJA4	cluster 0	0.000972066
AL122010.1	cluster 0	0.000194489
DLGAP3	cluster 0	0.00595717
TMEM35B	cluster 0	0.0146204
ZMYM6	cluster 0	0.488404
ZMYM1	cluster 0	0.610212
AL590434.1	cluster 0	0.025901
SFPQ	cluster 0	3.31255
ZMYM4	cluster 0	8.97596
ZMYM4-AS1	cluster 0	0.066655
KIAA0319L	cluster 0	2.92408
NCDN	cluster 0	0.0215804
AC004865.2	cluster 0	0.00581827
TFAP2E	cluster 0	0.0411803
PSMB2	cluster 0	0.152563
C1orf216	cluster 0	0.00604157
CLSPN	cluster 0	0.162409
AL354864.1	cluster 0	0.00155485
AGO4	cluster 0	1.14565
AGO1	cluster 0	0.27138
AL139286.3	cluster 0	0.0107007
AL139286.2	cluster 0	0.000583353
AGO3	cluster 0	5.025
AL138787.2	cluster 0	0.0651505
TEKT2	cluster 0	0.00155485
ADPRHL2	cluster 0	0.0741198
COL8A2	cluster 0	0.0477496
TRAPPC3	cluster 0	0.0698031
MAP7D1	cluster 0	0.0408648
THRAP3	cluster 0	0.986644
SH3D21	cluster 0	0.0525793
EVA1B	cluster 0	0.00363424
AL591845.1	cluster 0	0.00923877
STK40	cluster 0	0.150042
LSM10	cluster 0	0.00639824
OSCP1	cluster 0	0.0873621
MRPS15	cluster 0	0.0157698
CSF3R	cluster 0	0.00388261
AL596257.1	cluster 0	0.000194489
AC117945.2	cluster 0	0
AC117945.1	cluster 0	0.00038894
GRIK3	cluster 0	0.268236
AL031430.1	cluster 0	0
AL353604.1	cluster 0	0.00382802
LINC01137	cluster 0	0.0946028
ZC3H12A	cluster 0	0.023639
MEAF6	cluster 0	0.160318
SNIP1	cluster 0	0.0892528
DNALI1	cluster 0	0.0270082
GNL2	cluster 0	0.130755
AL513220.1	cluster 0	0.00416091
RSPO1	cluster 0	5.91637
C1orf109	cluster 0	0.0449465
CDCA8	cluster 0	0.00941855
EPHA10	cluster 0	0.00906672
MANEAL	cluster 0	0.0165111
AL929472.3	cluster 0	0.00038894
YRDC	cluster 0	0.0137993
C1orf122	cluster 0	0.0238494
MTF1	cluster 0	0.159979
AL929472.2	cluster 0	0.000777729
INPP5B	cluster 0	0.338671
SF3A3	cluster 0	0.448728
FHL3	cluster 0	0.0351893
UTP11	cluster 0	0.0506911
POU3F1	cluster 0	0.0383491
MIR3659HG	cluster 0	0.0463971
LINC02786	cluster 0	0.00038894
AL390839.1	cluster 0	0
AL390839.2	cluster 0	0.000194489
LINC01343	cluster 0	0
LINC01685	cluster 0	0.000777729
AL354702.2	cluster 0	0.00402177
RRAGC	cluster 0	0.0958591
AL139260.1	cluster 0	10.9137
MYCBP	cluster 0	0.0231904
GJA9	cluster 0	0.00764145
RHBDL2	cluster 0	0.0282907
AKIRIN1	cluster 0	0.134269
NDUFS5	cluster 0	0.0663448
MACF1	cluster 0	38.9136
AL356055.1	cluster 0	0.000972066
AL442071.2	cluster 0	0.020297
AL442071.1	cluster 0	0.00937719
BMP8A	cluster 0	0.0225612
PABPC4	cluster 0	0.882294
PABPC4-AS1	cluster 0	0.0111939
HEYL	cluster 0	0.00155485
AL035404.2	cluster 0	0.000194489
NT5C1A	cluster 0	0.000194489
HPCAL4	cluster 0	0.00169434
PPIE	cluster 0	0.107364
BMP8B	cluster 0	0.00363424
OXCT2	cluster 0	0.00038894
BMP8B-AS1	cluster 0	0
AL033527.3	cluster 0	0.000194489
AL033527.4	cluster 0	0.000972066
LINC02811	cluster 0	0.00504446
TRIT1	cluster 0	1.38368
MYCL	cluster 0	0.00460278
AL033527.2	cluster 0	0
MFSD2A	cluster 0	0.0322498
CAP1	cluster 0	0.362816
PPT1	cluster 0	0.085285
RLF	cluster 0	2.8348
TMCO2	cluster 0	0.0124853
AL050341.2	cluster 0	0.00194319
ZMPSTE24	cluster 0	0.185908
COL9A2	cluster 0	0.0825486
SMAP2	cluster 0	0.104984
AL031985.4	cluster 0	0.00421548
ZFP69B	cluster 0	0.00860612
AL031985.3	cluster 0	0.00208262
ZFP69	cluster 0	0.0111848
AL603839.3	cluster 0	0.0754662
EXO5	cluster 0	0.0198488
AL603839.1	cluster 0	0
AL603839.2	cluster 0	0.000777729
ZNF684	cluster 0	0.0307928
AL356379.2	cluster 0	0.00247075
RIMS3	cluster 0	0.0174377
AL031289.2	cluster 0	0.00038894
AL031289.1	cluster 0	0.0187506
NFYC-AS1	cluster 0	0.0105327
NFYC	cluster 0	1.219
KCNQ4	cluster 0	0.0327034
CITED4	cluster 0	0.0326427
AC119677.1	cluster 0	0.00498994
AL391730.2	cluster 0	0.000194489
CTPS1	cluster 0	0.0620036
SLFNL1-AS1	cluster 0	0.0855907
SLFNL1	cluster 0	0.0121758
SCMH1	cluster 0	19.9141
AC093151.8	cluster 0	0.00909657
AC093151.3	cluster 0	0.000583353
FOXO6	cluster 0	0.0133615
AC093151.2	cluster 0	0.00349503
EDN2	cluster 0	0.00429083
HIVEP3	cluster 0	11.2824
AL445933.2	cluster 0	0
AC119676.1	cluster 0	0
AL158216.1	cluster 0	0.000777729
GUCA2B	cluster 0	0
GUCA2A	cluster 0	0
FOXJ3	cluster 0	9.25712
AC096540.1	cluster 0	0.000194489
RIMKLA	cluster 0	0.00532244
ZMYND12	cluster 0	0.0101477
PPCS	cluster 0	0.0462127
CCDC30	cluster 0	2.25181
PPIH	cluster 0	0.0857913
AC098484.4	cluster 0	0.0659902
AC098484.2	cluster 0	0.00330118
YBX1	cluster 0	9.9147
CLDN19	cluster 0	0.00871477
P3H1	cluster 0	0.0567287
C1orf50	cluster 0	0.158623
AC098484.1	cluster 0	0
TMEM269	cluster 0	0.0464346
SVBP	cluster 0	0.0261882
ERMAP	cluster 0	0.0908895
AL512353.1	cluster 0	0.0122932
ZNF691	cluster 0	0.0129776
SLC2A1	cluster 0	2.10922
SLC2A1-AS1	cluster 0	0.0278351
AC099795.1	cluster 0	0.00038894
FAM183A	cluster 0	0.0272508
EBNA1BP2	cluster 0	2.07035
CFAP57	cluster 0	0.0291161
TMEM125	cluster 0	0.00595717
C1orf210	cluster 0	0.00402177
TIE1	cluster 0	0.00730972
MPL	cluster 0	0.0021373
AL139289.3	cluster 0	0.00038894
AL139289.2	cluster 0	0.0127764
CDC20	cluster 0	0.00518346
ELOVL1	cluster 0	0.0197583
MED8	cluster 0	0.0189415
AL139289.1	cluster 0	0.000583353
SZT2	cluster 0	0.358089
SZT2-AS1	cluster 0	0.000972066
HYI	cluster 0	0.037391
HYI-AS1	cluster 0	0.0144827
PTPRF	cluster 0	0.983409
KDM4A	cluster 0	0.413817
KDM4A-AS1	cluster 0	0.192359
ST3GAL3	cluster 0	2.28407
AL451062.1	cluster 0	0.0328475
ARTN	cluster 0	0.0021373
AL357079.1	cluster 0	0.00945215
IPO13	cluster 0	0.0168641
AL357079.2	cluster 0	0.000194489
DPH2	cluster 0	0.0160654
ATP6V0B	cluster 0	0.0390522
B4GALT2	cluster 0	0.0196214
CCDC24	cluster 0	0.044401
SLC6A9	cluster 0	0.0173838
AL139220.2	cluster 0	0.0113023
KLF17	cluster 0	0.000777729
KLF18	cluster 0	0
DMAP1	cluster 0	0.0478864
ERI3	cluster 0	0.495703
ERI3-IT1	cluster 0	0.000777729
RNF220	cluster 0	0.0813924
TMEM53	cluster 0	0.046786
ARMH1	cluster 0	0.136529
KIF2C	cluster 0	0.0133912
AL592166.1	cluster 0	0.0131063
RPS8	cluster 0	0.509117
BEST4	cluster 0	0.00543144
PLK3	cluster 0	0.062007
TCTEX1D4	cluster 0	0.000583353
BTBD19	cluster 0	0.0470886
PTCH2	cluster 0	0.189386
EIF2B3	cluster 0	1.17909
HECTD3	cluster 0	0.0349284
UROD	cluster 0	0.0202176
ZSWIM5	cluster 0	2.89587
LINC01144	cluster 0	0.0022767
HPDL	cluster 0	0
MUTYH	cluster 0	0.0438515
TOE1	cluster 0	0.0179033
TESK2	cluster 0	18.9137
CCDC163	cluster 0	0.137834
MMACHC	cluster 0	0.0443338
PRDX1	cluster 0	0.320329
AKR1A1	cluster 0	0.145238
NASP	cluster 0	7.06259
CCDC17	cluster 0	0.00557039
GPBP1L1	cluster 0	4.09588
TMEM69	cluster 0	0.0418268
IPP	cluster 0	0.178039
AL604028.1	cluster 0	0.00194319
MAST2	cluster 0	2.80206
PIK3R3	cluster 0	2.15292
AL358075.1	cluster 0	0.00274023
AL358075.2	cluster 0	25.9136
TSPAN1	cluster 0	0.0194064
P3R3URF	cluster 0	0.00038894
POMGNT1	cluster 0	0.0878186
LURAP1	cluster 0	15.9136
RAD54L	cluster 0	0.0284391
LRRC41	cluster 0	0.283693
UQCRH	cluster 0	0.0835075
NSUN4	cluster 0	0.116233
FAAH	cluster 0	0.0175417
LINC01398	cluster 0	0.000194489
DMBX1	cluster 0	0.000583353
TMEM275	cluster 0	0.000583353
MKNK1-AS1	cluster 0	0.00388261
KNCN	cluster 0	0.000194489
MKNK1	cluster 0	0.169069
MOB3C	cluster 0	0.00926861
ATPAF1	cluster 0	0.192625
TEX38	cluster 0	0.00136063
EFCAB14-AS1	cluster 0	0.0210592
EFCAB14	cluster 0	0.236332
CYP4B1	cluster 0	0.00368884
CYP4A11	cluster 0	0.000194489
CYP4X1	cluster 0	0.00831612
CYP4Z1	cluster 0	0.652736
CYP4A22-AS1	cluster 0	0.0191195
CYP4A22	cluster 0	0.000583353
LINC00853	cluster 0	0.00305266
PDZK1IP1	cluster 0	0.00609604
TAL1	cluster 0	0.000972066
AL135960.1	cluster 0	0.000194489
STIL	cluster 0	0.0497696
CMPK1	cluster 0	0.268292
LINC01389	cluster 0	0.0179033
FOXE3	cluster 0	0
FOXD2-AS1	cluster 0	0
FOXD2	cluster 0	0
LINC01738	cluster 0	0.00038894
TRABD2B	cluster 0	51.9136
AL691459.1	cluster 0	0
AC096541.1	cluster 0	0.000194489
LINC02794	cluster 0	0.0258716
AL356289.1	cluster 0	0.00038894
AL109659.1	cluster 0	0.0410112
SLC5A9	cluster 0	0.021035
AL109659.2	cluster 0	0.00368884
SPATA6	cluster 0	13.921
AGBL4	cluster 0	16.2982
AL391844.1	cluster 0	0
BEND5	cluster 0	0.0180405
AL645507.1	cluster 0	0.00233137
AC099788.1	cluster 0	0.108699
AL590432.1	cluster 0	0.00241609
AGBL4-IT1	cluster 0	0.000777729
ELAVL4	cluster 0	0.00338581
AL592182.2	cluster 0	0
AL592182.1	cluster 0	0.000194489
LINC02808	cluster 0	0.000583353
AL592182.3	cluster 0	0.000194489
DMRTA2	cluster 0	0.00653706
AL049637.2	cluster 0	0
FAF1	cluster 0	57.9136
AL049637.1	cluster 0	0.0104486
CDKN2C	cluster 0	0.0246268
C1orf185	cluster 0	0.0240123
LINC01562	cluster 0	0.0134362
RNF11	cluster 0	0.422978
AL162430.2	cluster 0	0.00675101
TTC39A	cluster 0	0.0284594
TTC39A-AS1	cluster 0	0.00357964
EPS15	cluster 0	5.21346
AC104170.2	cluster 0	0.00628934
AC104170.1	cluster 0	0.187813
OSBPL9	cluster 0	8.33506
NRDC	cluster 0	2.15888
AL050343.2	cluster 0	0.0119873
AL050343.3	cluster 0	0.0021373
RAB3B	cluster 0	0.19234
TXNDC12	cluster 0	0.139372
KTI12	cluster 0	0.00271941
AL445685.1	cluster 0	0.00730972
TXNDC12-AS1	cluster 0	0.000583353
BTF3L4	cluster 0	0.359912
ZFYVE9	cluster 0	2.47387
CC2D1B	cluster 0	0.100008
AL513218.1	cluster 0	0.00155485
AL513218.2	cluster 0	0.00233137
ORC1	cluster 0	0.0156286
PRPF38A	cluster 0	0.0929111
TUT4	cluster 0	7.94208
AL591167.1	cluster 0	0.00038894
GPX7	cluster 0	0.0122093
SHISAL2A	cluster 0	0.0213622
COA7	cluster 0	10.9137
ZYG11B	cluster 0	1.5575
ZYG11A	cluster 0	0.0206691
AC099677.4	cluster 0	0.00038894
ECHDC2	cluster 0	1.59246
SCP2	cluster 0	1.17223
PODN	cluster 0	0.0328964
AL445183.1	cluster 0	0.000583353
SLC1A7	cluster 0	0.00155485
AL445183.2	cluster 0	0
CPT2	cluster 0	0.0516649
AL606760.2	cluster 0	0.0198416
CZIB	cluster 0	0.0343066
AL606760.3	cluster 0	0.00551589
MAGOH	cluster 0	0.0811475
AL606760.1	cluster 0	0.00233137
LRP8	cluster 0	0.0236444
AL355483.3	cluster 0	0
AL355483.1	cluster 0	0
AL355483.2	cluster 0	0
LINC01771	cluster 0	0.00155485
AC119428.2	cluster 0	0.00038894
AC119428.1	cluster 0	0
LINC02812	cluster 0	0
DMRTB1	cluster 0	0.000194489
GLIS1	cluster 0	0.0485474
NDC1	cluster 0	0.403275
YIPF1	cluster 0	0.0764314
DIO1	cluster 0	0.00964481
HSPB11	cluster 0	0.213215
LRRC42	cluster 0	0.0475782
LDLRAD1	cluster 0	0.00330118
TMEM59	cluster 0	0.391033
TCEANC2	cluster 0	0.0649438
CDCP2	cluster 0	0.000777729
AL357673.2	cluster 0	0.000194489
CYB5RL	cluster 0	0.0431229
MRPL37	cluster 0	0.0654953
SSBP3	cluster 0	12.9172
SSBP3-AS1	cluster 0	0.00305266
AL161644.1	cluster 0	0.00136063
AL035415.1	cluster 0	0.000777729
AC099796.2	cluster 0	0.000777729
LINC02784	cluster 0	0.000194489
ACOT11	cluster 0	0.205063
FAM151A	cluster 0	0.00285873
AL590093.1	cluster 0	0.000972066
MROH7	cluster 0	0.119716
TTC4	cluster 0	0.117986
PARS2	cluster 0	0.00402177
TTC22	cluster 0	0.0238674
AC096536.1	cluster 0	0.00038894
LEXM	cluster 0	0.00537694
DHCR24	cluster 0	0.0279327
AC096536.3	cluster 0	0.0137956
AC096536.2	cluster 0	0.00038894
DHCR24-DT	cluster 0	0.000194489
AL590440.2	cluster 0	0.00274023
TMEM61	cluster 0	0.298958
AL590440.1	cluster 0	0.00764145
BSND	cluster 0	0.00116637
PCSK9	cluster 0	0.00136063
USP24	cluster 0	8.92481
MIR4422HG	cluster 0	0.00783446
AL603840.1	cluster 0	13.9706
LINC01755	cluster 0	0.00305266
LINC01753	cluster 0	0.0135364
AL353681.1	cluster 0	0.00111163
AC119674.1	cluster 0	8.16656
LINC01767	cluster 0	0.00038894
PLPP3	cluster 0	10.9512
PRKAA2	cluster 0	0.446755
FYB2	cluster 0	0.0328253
AL360295.1	cluster 0	0
C8A	cluster 0	0.000777729
C8B	cluster 0	0.000777729
AL161740.1	cluster 0	0.000194489
DAB1	cluster 0	6.29524
AL390243.1	cluster 0	0
DAB1-AS1	cluster 0	0.00136063
AL445193.2	cluster 0	0.00130591
OMA1	cluster 0	0.039299
AL035411.3	cluster 0	0.00907588
TACSTD2	cluster 0	0.0870136
MYSM1	cluster 0	2.26277
AL136985.3	cluster 0	0.159484
JUN	cluster 0	5.06537
LINC01135	cluster 0	0.0676863
AL136985.2	cluster 0	0
AL136985.1	cluster 0	0.00136063
LINC02777	cluster 0	0.00368884
LINC01358	cluster 0	0.0141289
AL592431.2	cluster 0	0
AL592431.1	cluster 0	0.000194489
AC093425.1	cluster 0	0.0150836
AC093424.1	cluster 0	0.000972066
FGGY	cluster 0	3.47177
AL035416.1	cluster 0	0.0233161
HOOK1	cluster 0	0.18906
CYP2J2	cluster 0	0.033306
C1orf87	cluster 0	0.0022767
LINC02778	cluster 0	0.000777729
LINC01748	cluster 0	0.00689895
AC099792.1	cluster 0	0.0227459
NFIA	cluster 0	30.4735
NFIA-AS2	cluster 0	0.0606792
NFIA-AS1	cluster 0	0.00252541
AC099791.3	cluster 0	0.0142405
AC099791.4	cluster 0	0.000194489
TM2D1	cluster 0	0.552802
AC099791.2	cluster 0	0.0108
PATJ	cluster 0	27.2812
L1TD1	cluster 0	0.043638
KANK4	cluster 0	4.97987
USP1	cluster 0	0.137064
DOCK7	cluster 0	11.2596
ANGPTL3	cluster 0	0.00620496
AC103923.1	cluster 0	0.0503727
ATG4C	cluster 0	0.47894
AC099794.1	cluster 0	0.00038894
LINC01739	cluster 0	0.00252541
AL162400.3	cluster 0	0.00038894
AL162400.1	cluster 0	0
AL162400.2	cluster 0	0
AC096543.1	cluster 0	0.000583353
LINC00466	cluster 0	0.0114477
AC096543.2	cluster 0	0
FOXD3-AS1	cluster 0	0.000972066
FOXD3	cluster 0	0.000194489
ALG6	cluster 0	0.172976
ITGB3BP	cluster 0	3.06296
BX004807.1	cluster 0	0.0291052
EFCAB7	cluster 0	0.335206
DLEU2L	cluster 0	0.0242954
PGM1	cluster 0	1.46
ROR1	cluster 0	13.9337
ROR1-AS1	cluster 0	0.146338
AL445205.1	cluster 0	0.000194489
UBE2U	cluster 0	0.0183295
CACHD1	cluster 0	36.9136
RAVER2	cluster 0	1.147
JAK1	cluster 0	17.0246
LINC01359	cluster 0	0.0752887
AL357078.2	cluster 0	0.00943147
AK4	cluster 0	1.97196
DNAJC6	cluster 0	0.872415
AL139294.1	cluster 0	0.0193973
LEPROT	cluster 0	0.113508
LEPR	cluster 0	1.60928
AC119800.1	cluster 0	0.000972066
AL513493.1	cluster 0	0.000194489
PDE4B	cluster 0	73.9136
AL590783.1	cluster 0	0.0111099
SGIP1	cluster 0	16.9136
AL139147.1	cluster 0	0.020297
TCTEX1D1	cluster 0	0.00474184
INSL5	cluster 0	0.00038894
WDR78	cluster 0	3.20947
AL592161.1	cluster 0	0.000194489
MIER1	cluster 0	1.63763
SLC35D1	cluster 0	2.45475
C1orf141	cluster 0	0.00349503
AL133320.2	cluster 0	0.000583353
IL23R	cluster 0	0.00252541
IL12RB2	cluster 0	0.0348189
SERBP1	cluster 0	0.554221
LINC01702	cluster 0	0.000583353
GADD45A	cluster 0	0.152277
GNG12	cluster 0	1.76942
GNG12-AS1	cluster 0	29.9136
DIRAS3	cluster 0	0.0438761
WLS	cluster 0	14.9953
RPE65	cluster 0	0.0251773
DEPDC1	cluster 0	0.00305266
AL138789.1	cluster 0	0
DEPDC1-AS1	cluster 0	0.00252541
AL035412.1	cluster 0	0.000194489
AL033530.1	cluster 0	0.0106411
AL691520.1	cluster 0	0.482959
LINC01707	cluster 0	1.38776
LINC02791	cluster 0	0.0021373
LINC01758	cluster 0	0.000194489
AL359894.1	cluster 0	0.00136063
LRRC7	cluster 0	0.0511101
AL117353.1	cluster 0	0.000194489
AL158840.1	cluster 0	0
LRRC40	cluster 0	0.441663
SRSF11	cluster 0	11.9364
AL353771.1	cluster 0	0.00310729
ANKRD13C	cluster 0	3.00028
HHLA3	cluster 0	0.101739
AL158839.1	cluster 0	0.000583353
CTH	cluster 0	0.113913
AL354872.2	cluster 0	0.000583353
LINC01788	cluster 0	0.00155485
AL513285.1	cluster 0	0
PTGER3	cluster 0	6.27634
AL031429.1	cluster 0	0.000194489
AL031429.2	cluster 0	0.00038894
ZRANB2-AS1	cluster 0	0.053498
ZRANB2	cluster 0	2.77498
ZRANB2-AS2	cluster 0	1.66429
NEGR1	cluster 0	17.227
AL354949.1	cluster 0	0.000583353
NEGR1-IT1	cluster 0	0
AL513166.1	cluster 0	4.48669
AL583808.1	cluster 0	0.0666383
LINC02796	cluster 0	0.00241609
LINC02797	cluster 0	0.00155485
LINC01360	cluster 0	0.00038894
LINC02238	cluster 0	0.00136063
AL591463.1	cluster 0	0.00194319
LRRIQ3	cluster 0	0.0190772
FPGT	cluster 0	0.231182
TNNI3K	cluster 0	0.734172
AC093158.1	cluster 0	0.00791871
AC105271.1	cluster 0	0
LRRC53	cluster 0	0.00363424
ERICH3	cluster 0	0.00474184
ERICH3-AS1	cluster 0	0.000583353
AC135803.1	cluster 0	0.00324656
CRYZ	cluster 0	0.14928
TYW3	cluster 0	0.164933
AC133865.1	cluster 0	0
AC099786.3	cluster 0	0
AC099786.1	cluster 0	0
LHX8	cluster 0	0.000777729
AC099786.2	cluster 0	0
SLC44A5	cluster 0	1.57394
ACADM	cluster 0	0.77339
RABGGTB	cluster 0	0.121937
MSH4	cluster 0	0.128585
ASB17	cluster 0	0.00285873
AC092813.1	cluster 0	0.0101981
AC092813.2	cluster 0	0.000583353
ST6GALNAC3	cluster 0	8.95167
AC104458.1	cluster 0	0.000972066
LINC02567	cluster 0	0.000194489
ST6GALNAC5	cluster 0	10.9157
AL035409.1	cluster 0	0.01256
PIGK	cluster 0	0.735885
AC093433.2	cluster 0	0.00824107
AK5	cluster 0	15.1722
AC095030.1	cluster 0	0.00233137
AC093575.1	cluster 0	0.00324656
AC118549.1	cluster 0	11.1123
USP33	cluster 0	3.25364
MIGA1	cluster 0	1.14437
NEXN-AS1	cluster 0	0.0128396
NEXN	cluster 0	5.96376
FUBP1	cluster 0	1.62661
DNAJB4	cluster 0	0.0599386
GIPC2	cluster 0	0.0715711
AC103591.3	cluster 0	0.134355
AC103591.4	cluster 0	0.00194319
AC096531.2	cluster 0	0.00136063
PTGFR	cluster 0	0.00557039
IFI44L	cluster 0	0.277266
IFI44	cluster 0	0.152982
ADGRL4	cluster 0	1.87006
AL353651.2	cluster 0	0
AL353651.1	cluster 0	0
LINC02792	cluster 0	0.000194489
AC099671.1	cluster 0	0.0021373
AC098657.2	cluster 0	0.000194489
AL606519.1	cluster 0	0
AL136234.1	cluster 0	0.00202794
LINC01781	cluster 0	0.00233137
AC093154.1	cluster 0	0.000194489
ADGRL2	cluster 0	36.9136
AL138799.2	cluster 0	0
AL138799.4	cluster 0	0.00194319
AC117944.1	cluster 0	0.00174904
AL157944.1	cluster 0	0.0305769
LINC01362	cluster 0	0.0767391
LINC01361	cluster 0	0.00460278
AC116099.1	cluster 0	0.0353894
LINC01712	cluster 0	0.00808179
LINC01725	cluster 0	20.9137
AL035706.1	cluster 0	0.00421548
TTLL7	cluster 0	2.19606
TTLL7-IT1	cluster 0	0.00194319
AC104454.2	cluster 0	0.00150014
AL359504.2	cluster 0	0.0139911
PRKACB	cluster 0	7.98561
SAMD13	cluster 0	0.0393211
DNASE2B	cluster 0	0.000777729
AL844170.1	cluster 0	0.00038894
RPF1	cluster 0	0.0775263
GNG5	cluster 0	0.0623565
SPATA1	cluster 0	0.100327
CTBS	cluster 0	0.140954
AL359762.1	cluster 0	0.00959969
AL359762.2	cluster 0	0.000194489
LINC01555	cluster 0	0.00357964
SSX2IP	cluster 0	0.147252
AC104169.1	cluster 0	0.000194489
LPAR3	cluster 0	0.144609
MCOLN2	cluster 0	0.0343283
WDR63	cluster 0	0.05054
MCOLN3	cluster 0	0.0919548
SYDE2	cluster 0	0.146203
C1orf52	cluster 0	0.251258
BCL10	cluster 0	0.0329423
AL078459.1	cluster 0	0.128059
DDAH1	cluster 0	4.43111
AL360219.1	cluster 0	0
AC092807.3	cluster 0	0.01733
AC092807.2	cluster 0	0.00116637
CCN1	cluster 0	1.79277
AC092807.1	cluster 0	0
ZNHIT6	cluster 0	0.957785
COL24A1	cluster 0	0.0600301
LINC02795	cluster 0	0.0100392
ODF2L	cluster 0	1.49393
CLCA2	cluster 0	0.0284822
CLCA1	cluster 0	0.00038894
CLCA4	cluster 0	0.0114702
CLCA4-AS1	cluster 0	0.0443754
AL049597.2	cluster 0	0.00136063
SH3GLB1	cluster 0	0.721664
AL355981.1	cluster 0	0.000777729
SELENOF	cluster 0	0.655044
HS2ST1	cluster 0	9.9672
AL121989.1	cluster 0	0.0108389
LINC01140	cluster 0	0.00811166
LINC02801	cluster 0	0.00155485
LMO4	cluster 0	1.36505
LINC01364	cluster 0	0.0264477
PKN2-AS1	cluster 0	2.92534
AL445438.1	cluster 0	0
PKN2	cluster 0	9.96781
GTF2B	cluster 0	0.854677
KYAT3	cluster 0	1.02176
RBMXL1	cluster 0	0.0652144
GBP3	cluster 0	0.105639
GBP1	cluster 0	0.0844973
GBP2	cluster 0	3.94426
AC104459.1	cluster 0	0.0335763
GBP7	cluster 0	0.0162234
GBP4	cluster 0	0.0133615
AC099063.4	cluster 0	0.00136063
GBP5	cluster 0	0.00130591
AC099063.1	cluster 0	0.00038894
GBP6	cluster 0	0.00382802
AL596214.1	cluster 0	0.0234526
LRRC8B	cluster 0	0.124913
LRRC8C-DT	cluster 0	0.0608533
AC093423.2	cluster 0	0.000777729
LRRC8C	cluster 0	1.5693
AC099568.1	cluster 0	0.000194489
AC099568.2	cluster 0	0
LRRC8D	cluster 0	3.99859
AL391497.1	cluster 0	0.00116637
ZNF326	cluster 0	1.0915
AL161797.1	cluster 0	0.00136063
AC098656.1	cluster 0	0.000972066
AL627316.1	cluster 0	0.00136063
LINC02787	cluster 0	0
BARHL2	cluster 0	0.000194489
AC092805.1	cluster 0	0
LINC02609	cluster 0	0.139777
LINC02788	cluster 0	0.00344042
LINC01763	cluster 0	0.00682197
AC091614.1	cluster 0	0.00252541
ZNF644	cluster 0	6.27387
HFM1	cluster 0	0.223461
CDC7	cluster 0	7.91427
TGFBR3	cluster 0	42.0524
BRDT	cluster 0	0.00407634
EPHX4	cluster 0	0.00421548
SETSIP	cluster 0	0
BTBD8	cluster 0	0.440401
AC104836.1	cluster 0	0.00116637
C1orf146	cluster 0	0.00493541
GLMN	cluster 0	0.32882
RPAP2	cluster 0	1.84671
GFI1	cluster 0	0.00291337
EVI5	cluster 0	7.23146
RPL5	cluster 0	2.12829
DIPK1A	cluster 0	5.03639
AC093577.1	cluster 0	0.000583353
MTF2	cluster 0	1.28451
TMED5	cluster 0	0.239439
CCDC18	cluster 0	9.60699
CCDC18-AS1	cluster 0	6.19855
DR1	cluster 0	0.149303
FNBP1L	cluster 0	15.0863
BCAR3	cluster 0	3.20535
AL109613.1	cluster 0	0.0193769
AL049796.1	cluster 0	0.00116637
DNTTIP2	cluster 0	0.154598
GCLM	cluster 0	5.24495
ABCA4	cluster 0	0.0654247
AC093579.1	cluster 0	0
ARHGAP29	cluster 0	3.87307
ARHGAP29-AS1	cluster 0	0.00557039
AC097059.1	cluster 0	0
AC118469.2	cluster 0	0.000583353
ABCD3	cluster 0	5.9328
F3	cluster 0	0.191289
AC093117.1	cluster 0	0.00038894
SLC44A3	cluster 0	0.167817
CNN3	cluster 0	0.433277
AC105942.1	cluster 0	0.0365246
ALG14	cluster 0	0.59021
AC095033.1	cluster 0	0.00155485
TLCD4	cluster 0	0.0302101
AC092802.3	cluster 0	0
AC092802.1	cluster 0	0.205416
RWDD3	cluster 0	0.127443
AC092802.2	cluster 0	0.0101477
AC092802.4	cluster 0	0.00150014
LINC01760	cluster 0	0.000722973
LINC01650	cluster 0	0
AL445218.1	cluster 0	0.000194489
LINC01761	cluster 0	0.00808179
LINC02607	cluster 0	13.933
AL683887.1	cluster 0	0.000583353
LINC02790	cluster 0	1.25253
LINC01787	cluster 0	0.0021373
PTBP2	cluster 0	7.97701
DPYD	cluster 0	29.1835
DPYD-AS1	cluster 0	0.483827
DPYD-IT1	cluster 0	0.00252541
DPYD-AS2	cluster 0	0.000777729
MIR137HG	cluster 0	0.0018885
BX005019.1	cluster 0	0
AC104453.1	cluster 0	0
LINC01776	cluster 0	0.000972066
SNX7	cluster 0	3.96966
PLPPR5	cluster 0	0.00285873
AL445433.2	cluster 0	0.00628934
PLPPR4	cluster 0	0.0130146
LINC01708	cluster 0	0.0158437
PALMD	cluster 0	4.10978
FRRS1	cluster 0	0.267918
AGL	cluster 0	19.9136
AC118553.1	cluster 0	0.000777729
SLC35A3	cluster 0	1.11337
MFSD14A	cluster 0	0.6027
AC093019.2	cluster 0	0.0527293
SASS6	cluster 0	0.124614
TRMT13	cluster 0	0.557342
LRRC39	cluster 0	0.0724368
DBT	cluster 0	0.268021
AL445928.2	cluster 0	0.0382745
RTCA-AS1	cluster 0	0.0903521
RTCA	cluster 0	0.160053
AC104457.2	cluster 0	0
CDC14A	cluster 0	2.43922
AL589990.1	cluster 0	0.0198621
GPR88	cluster 0	0.00038894
LINC01349	cluster 0	0.00136063
AC099670.3	cluster 0	0.00038894
VCAM1	cluster 0	0.00252541
EXTL2	cluster 0	0.151608
AC104506.1	cluster 0	0.00427004
SLC30A7	cluster 0	0.854937
DPH5	cluster 0	0.10447
AC093157.2	cluster 0	0.00116637
AC093157.1	cluster 0	0.231099
AL109741.1	cluster 0	0.000777729
S1PR1	cluster 0	0.00285873
LINC01307	cluster 0	0.00116637
LINC01709	cluster 0	0.00194319
OLFM3	cluster 0	0.00913751
AC114485.1	cluster 0	1.25627
AC099567.1	cluster 0	0.00194319
COL11A1	cluster 0	8.9722
AC095032.2	cluster 0	0.00038894
AC095032.1	cluster 0	0.1439
RNPC3	cluster 0	1.19214
AMY2B	cluster 0	0.252557
AMY2A	cluster 0	0.00038894
AMY1A	cluster 0	0
AMY1B	cluster 0	0
AMY1C	cluster 0	0
AL591888.1	cluster 0	0.00116637
LINC01676	cluster 0	0.00673028
LINC01677	cluster 0	0.00136063
AL355306.2	cluster 0	0.00427004
LINC01661	cluster 0	0.00155485
PRMT6	cluster 0	0.0155001
NTNG1	cluster 0	0.69768
VAV3	cluster 0	26.9136
VAV3-AS1	cluster 0	0.00992151
LINC02785	cluster 0	0.0272675
SLC25A24	cluster 0	0.859352
AL359258.2	cluster 0	0.00252541
NBPF4	cluster 0	0
AL359258.1	cluster 0	0
AL390038.1	cluster 0	0
NBPF6	cluster 0	0
FAM102B	cluster 0	0.851419
HENMT1	cluster 0	0.0141046
AL160171.1	cluster 0	0.00474184
PRPF38B	cluster 0	0.337728
FNDC7	cluster 0	0.0112481
AL591719.2	cluster 0	0
STXBP3	cluster 0	1.0749
AKNAD1	cluster 0	0.187934
SPATA42	cluster 0	0
GPSM2	cluster 0	0.403891
CLCC1	cluster 0	0.0553041
WDR47	cluster 0	1.75222
TAF13	cluster 0	0.0390485
AL356488.3	cluster 0	0.0254145
TMEM167B	cluster 0	0.0184968
AL356488.2	cluster 0	0.0700418
C1orf194	cluster 0	0.00893742
KIAA1324	cluster 0	9.0445
SARS	cluster 0	0.485013
CELSR2	cluster 0	0.0748018
PSRC1	cluster 0	0.00846759
MYBPHL	cluster 0	0.00700779
SORT1	cluster 0	0.500206
PSMA5	cluster 0	0.149501
SYPL2	cluster 0	0.00233137
ATXN7L2	cluster 0	0.0133524
CYB561D1	cluster 0	0.0227272
AMIGO1	cluster 0	0.00116637
GPR61	cluster 0	0.00116637
AL355310.3	cluster 0	0
GNAI3	cluster 0	11.9146
AL355310.1	cluster 0	0.00368884
GNAT2	cluster 0	0.00038894
AMPD2	cluster 0	0.0263777
AL355310.2	cluster 0	0.000194489
GSTM4	cluster 0	0.0397475
GSTM2	cluster 0	0.127323
GSTM1	cluster 0	0.00407634
AC000032.1	cluster 0	0.0130317
GSTM5	cluster 0	0.00407634
AL158847.1	cluster 0	0
GSTM3	cluster 0	0.0296463
EPS8L3	cluster 0	0.00130591
LINC01768	cluster 0	0.00252541
AL450468.1	cluster 0	0
AL450468.2	cluster 0	0
CSF1	cluster 0	0.0403045
AHCYL1	cluster 0	0.36904
STRIP1	cluster 0	0.125591
AL160006.1	cluster 0	0.0147877
ALX3	cluster 0	0.000972066
LINC01397	cluster 0	0.00155485
UBL4B	cluster 0	0.000722973
SLC6A17	cluster 0	0.00194319
AL355990.1	cluster 0	0
AL355990.2	cluster 0	0
LINC02586	cluster 0	0.0018885
KCNC4	cluster 0	0.259926
RBM15-AS1	cluster 0	0.0183983
RBM15	cluster 0	0.0755342
LAMTOR5-AS1	cluster 0	0.403861
SLC16A4	cluster 0	0.158877
AL355488.1	cluster 0	0.0206282
LAMTOR5	cluster 0	0.0406202
PROK1	cluster 0	0.000194489
AL358215.1	cluster 0	0
AL358215.2	cluster 0	0.000194489
CYMP-AS1	cluster 0	0
KCNA10	cluster 0	0
KCNA2	cluster 0	0.00194319
AL365361.1	cluster 0	0.000583353
KCNA3	cluster 0	0
CD53	cluster 0	0.00523797
AL360270.2	cluster 0	0.00692346
AL360270.1	cluster 0	0.00532244
LRIF1	cluster 0	0.0937736
AL360270.3	cluster 0	0.00038894
DRAM2	cluster 0	0.126388
CEPT1	cluster 0	0.469963
AL355816.1	cluster 0	0.00285873
AL355816.2	cluster 0	0.0111099
DENND2D	cluster 0	0.0350342
CHI3L2	cluster 0	0.0100934
CHIA	cluster 0	0.000194489
AL356387.1	cluster 0	0.000194489
PIFO	cluster 0	0.0132533
OVGP1	cluster 0	0.0152455
AL390195.2	cluster 0	0.00943147
AL390195.1	cluster 0	0.0067847
WDR77	cluster 0	0.0238086
ATP5PB	cluster 0	0.0750139
C1orf162	cluster 0	0.0246419
TMIGD3	cluster 0	0.00271941
ADORA3	cluster 0	0
RAP1A	cluster 0	4.00006
LINC01160	cluster 0	0.00038894
INKA2	cluster 0	0.125915
INKA2-AS1	cluster 0	0.00697788
AL049557.1	cluster 0	0.00479638
DDX20	cluster 0	1.26633
KCND3	cluster 0	1.30989
KCND3-IT1	cluster 0	0
KCND3-AS1	cluster 0	0
LINC01750	cluster 0	0.00136063
AL445426.1	cluster 0	0.698866
CTTNBP2NL	cluster 0	0.42632
WNT2B	cluster 0	0.816241
AL354760.1	cluster 0	0.00116637
ST7L	cluster 0	1.74881
CAPZA1	cluster 0	0.938004
MOV10	cluster 0	0.144121
AL603832.1	cluster 0	0.00628934
RHOC	cluster 0	0.026304
PPM1J	cluster 0	0.00725532
AL603832.2	cluster 0	0.00038894
TAFA3	cluster 0	0.00816601
LINC01356	cluster 0	0.00686904
LINC01357	cluster 0	0.00498994
SLC16A1	cluster 0	1.05019
SLC16A1-AS1	cluster 0	2.37998
AL390242.1	cluster 0	0.0203266
LRIG2-DT	cluster 0	0.0997391
LRIG2	cluster 0	0.545589
MAGI3	cluster 0	18.9137
PHTF1	cluster 0	0.907847
RSBN1	cluster 0	0.457195
AL137856.1	cluster 0	0.0195083
PTPN22	cluster 0	13.9136
AP4B1-AS1	cluster 0	0.0220442
BCL2L15	cluster 0	0.00815685
AP4B1	cluster 0	0.046027
DCLRE1B	cluster 0	0.00465732
HIPK1-AS1	cluster 0	0.00551589
HIPK1	cluster 0	0.249355
OLFML3	cluster 0	0.0125394
AL591742.2	cluster 0	0
SYT6	cluster 0	0.000777729
AL121999.1	cluster 0	0.00136063
TRIM33	cluster 0	2.48542
BCAS2	cluster 0	0.111522
DENND2C	cluster 0	1.7358
AMPD1	cluster 0	0.00951558
NRAS	cluster 0	0.0783434
CSDE1	cluster 0	1.01238
SIKE1	cluster 0	0.0700956
SYCP1	cluster 0	0.0252176
TSHB	cluster 0	0.000583353
TSPAN2	cluster 0	0.146999
LINC01765	cluster 0	0.00252541
AL049825.1	cluster 0	0.00377343
NGF-AS1	cluster 0	0.0159424
NGF	cluster 0	0.731524
AL512638.3	cluster 0	0.000194489
VANGL1	cluster 0	0.0387761
CASQ2	cluster 0	0.00271941
NHLH2	cluster 0	0.00111163
LINC01649	cluster 0	0.000777729
SLC22A15	cluster 0	0.443192
AL365318.1	cluster 0	0.00319194
MAB21L3	cluster 0	0.00460278
LINC01779	cluster 0	0
AL355538.1	cluster 0	0.000194489
ATP1A1	cluster 0	3.00124
ATP1A1-AS1	cluster 0	0.120961
LINC01762	cluster 0	0.0274914
AL136376.1	cluster 0	0
AL390066.1	cluster 0	0.00402177
AL390066.2	cluster 0	0.000583353
CD58	cluster 0	0.244322
IGSF3	cluster 0	0.147899
C1orf137	cluster 0	0.0232597
CD2	cluster 0	0.0147955
AL157904.1	cluster 0	0.000583353
PTGFRN	cluster 0	0.401172
CD101	cluster 0	0.0415788
AL445231.1	cluster 0	0.00609604
TTF2	cluster 0	0.163152
TRIM45	cluster 0	0.0261589
VTCN1	cluster 0	1.3215
LINC01525	cluster 0	0.00285873
AL358072.1	cluster 0	0.00174904
MAN1A2	cluster 0	16.9136
AL157902.1	cluster 0	0.00435459
TENT5C	cluster 0	0.202669
GDAP2	cluster 0	1.59795
WDR3	cluster 0	0.222717
SPAG17	cluster 0	0.0286358
AL391557.1	cluster 0	0
TBX15	cluster 0	0.736919
AL139420.1	cluster 0	0
AL139420.2	cluster 0	0
WARS2	cluster 0	1.5274
WARS2-IT1	cluster 0	0.0129532
WARS2-AS1	cluster 0	1.26198
AL359915.1	cluster 0	0.0179534
LINC01780	cluster 0	0.00266476
HAO2	cluster 0	0.00174904
HAO2-IT1	cluster 0	0
HSD3B2	cluster 0	0.000194489
HSD3B1	cluster 0	0.000194489
LINC00622	cluster 0	0.00136063
ZNF697	cluster 0	0.0564175
PHGDH	cluster 0	0.0912875
HMGCS2	cluster 0	0.00485091
REG4	cluster 0	0.000777729
ADAM30	cluster 0	0.00537694
NOTCH2	cluster 0	2.72262
AC245008.1	cluster 0	0.000194489
SEC22B	cluster 0	0.187153
AC253572.1	cluster 0	0.000194489
NBPF26	cluster 0	0.153172
AC253572.2	cluster 0	0.612742
PPIAL4A	cluster 0	0
LINC00623	cluster 0	0.107168
FCGR1B	cluster 0	0.00155485
AC244453.3	cluster 0	0.0191028
AC244453.2	cluster 0	0.0022767
AC244453.1	cluster 0	0.00620496
FAM72B	cluster 0	0.00116637
SRGAP2C	cluster 0	0.150708
SRGAP2-AS1	cluster 0	0.00565483
LINC02798	cluster 0	0.0517992
AL592494.1	cluster 0	0.000194489
AL592494.2	cluster 0	0
LINC01691	cluster 0	0.000194489
LINC02799	cluster 0	0.000194489
AC239800.2	cluster 0	0.00860612
LINC02591	cluster 0	0.0203303
HIST2H3PS2	cluster 0	0.0283769
AC246680.1	cluster 0	0.00330118
FAM72C	cluster 0	0.00038894
IGKV1OR1-1	cluster 0	0
LINC02802	cluster 0	0.0160988
PPIAL4E	cluster 0	0
AC246785.3	cluster 0	0.00628934
NBPF15	cluster 0	0.177339
PPIAL4F	cluster 0	0
LINC01632	cluster 0	0
FP700111.1	cluster 0	0.00440915
SRGAP2B	cluster 0	0.0620157
FAM72D	cluster 0	0.00038894
PPIAL4D	cluster 0	0
AC245014.3	cluster 0	0.179738
AC245014.1	cluster 0	0.000194489
NBPF20	cluster 0	0.0239985
AC239860.4	cluster 0	0.00038894
GPR89A	cluster 0	0.127034
PDZK1	cluster 0	0.0283619
CD160	cluster 0	0.0105327
RNF115	cluster 0	3.14406
POLR3C	cluster 0	0.153819
NUDT17	cluster 0	0.0170015
PIAS3	cluster 0	0.114046
ANKRD35	cluster 0	0.0218743
ITGA10	cluster 0	0.265367
AC243547.1	cluster 0	0.000777729
PEX11B	cluster 0	0.0565077
RBM8A	cluster 0	0.103073
LIX1L-AS1	cluster 0	1.26219
LIX1L	cluster 0	0.35986
ANKRD34A	cluster 0	0.00564564
AC243547.2	cluster 0	0.00116637
POLR3GL	cluster 0	0.04159
TXNIP	cluster 0	4.97582
HJV	cluster 0	0.822395
AC239799.2	cluster 0	0.116712
LINC01719	cluster 0	0.0179571
NBPF10	cluster 0	0.0668308
NOTCH2NLA	cluster 0	0.0605756
AC239799.1	cluster 0	0.000972066
PPIAL4H	cluster 0	0
AC245407.2	cluster 0	0.18808
NBPF12	cluster 0	0.340767
AC244394.2	cluster 0	0.00038894
PRKAB2	cluster 0	0.0910599
AC242426.2	cluster 0	0.161929
FMO5	cluster 0	0.0465764
CHD1L	cluster 0	0.0105327
LINC00624	cluster 0	0.0633228
BCL9	cluster 0	0.109659
ACP6	cluster 0	0.139739
AC241644.1	cluster 0	0
GJA5	cluster 0	0.00155485
AC241644.3	cluster 0	0
AC241644.2	cluster 0	0.000194489
GJA8	cluster 0	0
GPR89B	cluster 0	0.169635
AC239803.1	cluster 0	0.00116637
LINC02804	cluster 0	0.0067847
NBPF11	cluster 0	0.309576
LINC02805	cluster 0	0.00427004
AC239809.3	cluster 0	0.0970548
LINC01731	cluster 0	0.00939787
LINC01138	cluster 0	1.23553
LINC02806	cluster 0	0.00038894
AC245100.1	cluster 0	0.0209923
AC245100.6	cluster 0	0.00174904
PPIAL4G	cluster 0	0.00597792
NBPF14	cluster 0	0.140876
NOTCH2NLB	cluster 0	0.000194489
NUDT4B	cluster 0	0.00038894
PDE4DIP	cluster 0	0.224689
AC239802.1	cluster 0	0.00038894
AC239802.2	cluster 0	0.00155485
AC239804.1	cluster 0	0.000777729
NBPF9	cluster 0	0.108317
AC245297.3	cluster 0	0.505052
AC245297.2	cluster 0	0.00692346
NOTCH2NLC	cluster 0	0.223145
NBPF19	cluster 0	0.0957918
PPIAL4C	cluster 0	0
AC242842.1	cluster 0	0.00330118
FCGR1A	cluster 0	0.00194319
HIST2H2BF	cluster 0	2.98187
AC243772.2	cluster 0	0.0104991
HIST2H3D	cluster 0	0.00407634
HIST2H4A	cluster 0	0.00697788
HIST2H3C	cluster 0	0
HIST2H2AA3	cluster 0	0.00038894
HIST2H2AA4	cluster 0	0.054033
HIST2H3A	cluster 0	0
HIST2H4B	cluster 0	0.0266828
AC239868.1	cluster 0	0.0101477
HIST2H2BE	cluster 0	0.0921058
HIST2H2AC	cluster 0	0.110156
HIST2H2AB	cluster 0	0.00576379
BOLA1	cluster 0	0.521085
SV2A	cluster 0	0.0415459
SF3B4	cluster 0	0.0220442
MTMR11	cluster 0	0.042705
OTUD7B	cluster 0	0.747249
AC244033.2	cluster 0	0.0717369
VPS45	cluster 0	0.896411
PLEKHO1	cluster 0	0.0629935
AC242988.2	cluster 0	0.00854263
ANP32E	cluster 0	0.0991406
AC242988.1	cluster 0	0.00537694
CA14	cluster 0	0.00330118
APH1A	cluster 0	0.0215268
C1orf54	cluster 0	0.0152212
CIART	cluster 0	0.0126846
MRPS21	cluster 0	0.131301
PRPF3	cluster 0	0.557025
RPRD2	cluster 0	6.92173
TARS2	cluster 0	0.172432
ECM1	cluster 0	0.016565
FALEC	cluster 0	0.0261524
AL356356.1	cluster 0	0.0603303
ADAMTSL4	cluster 0	0.0323775
ADAMTSL4-AS1	cluster 0	14.1929
MCL1	cluster 0	1.93461
ENSA	cluster 0	0.905041
GOLPH3L	cluster 0	0.473397
HORMAD1	cluster 0	0.00440915
CTSS	cluster 0	0.0271225
CTSK	cluster 0	0.0586472
ARNT	cluster 0	0.829583
CTXND2	cluster 0	0.00402177
SETDB1	cluster 0	0.272666
CERS2	cluster 0	0.033768
AL590133.2	cluster 0	0.000972066
AL590133.1	cluster 0	0.000777729
ANXA9	cluster 0	0.00686904
MINDY1	cluster 0	0.0537291
PRUNE1	cluster 0	0.116501
BNIPL	cluster 0	0.0535908
C1orf56	cluster 0	0.0778777
CDC42SE1	cluster 0	0.186789
MLLT11	cluster 0	0.0144044
GABPB2	cluster 0	0.414359
AL592424.1	cluster 0	0.00155485
SEMA6C	cluster 0	0.0410025
TNFAIP8L2	cluster 0	0.00038894
SCNM1	cluster 0	0.0195381
LYSMD1	cluster 0	0.0553599
TMOD4	cluster 0	0.000194489
VPS72	cluster 0	0.0350924
PIP5K1A	cluster 0	1.39854
PSMD4	cluster 0	0.0883004
ZNF687-AS1	cluster 0	0.00987102
ZNF687	cluster 0	0.0178199
PI4KB	cluster 0	0.255858
AL391069.3	cluster 0	0.00038894
RFX5	cluster 0	0.0103944
AL391069.1	cluster 0	0.00038894
AL391069.2	cluster 0	0.000194489
SELENBP1	cluster 0	0.0568863
PSMB4	cluster 0	0.0377419
POGZ	cluster 0	4.13507
CGN	cluster 0	0.0187506
TUFT1	cluster 0	0.0352784
AL365436.2	cluster 0	0.00363424
SNX27	cluster 0	0.740047
AL391335.1	cluster 0	0.00523797
CELF3	cluster 0	0.000194489
AL589765.1	cluster 0	0.0021373
RIIAD1	cluster 0	0.00750279
AL589765.7	cluster 0	0.0022767
MRPL9	cluster 0	0.030923
OAZ3	cluster 0	0.00155485
AL589765.4	cluster 0	0.00038894
AL589765.2	cluster 0	0
AL589765.5	cluster 0	0
TDRKH	cluster 0	0.0222511
TDRKH-AS1	cluster 0	0.000972066
AL589765.6	cluster 0	0.000777729
LINGO4	cluster 0	0.00576379
RORC	cluster 0	0.0561259
[truncated: 730,022+ more rows]
