# Supplementary material for: Single nuclei chromatin accessibility and transcriptomic map of breast tissues of women of diverse genetic ancestry
Source: bioRxiv preprint, doi:10.1101/2023.10.04.560911, version 1 (2023-10-06)
Supplement: Table S15 [file 560911_file25.xlsx]

## Sheet: Sheet 1
Table S15: Gene expression differences between ductal and lobular epithelial cells
Feature	Comparison	Estimate	P	BH	sig_level
A2M	lobule vs duct	-0.116568	0.612017	0.978494	NS or Estimate < 0.5
NAT2	lobule vs duct	0.241737	0.266441	0.936241	NS or Estimate < 0.5
ACADM	lobule vs duct	-0.164999	0.462175	0.960004	NS or Estimate < 0.5
ACADS	lobule vs duct	-0.16208	0.503434	0.962968	NS or Estimate < 0.5
ACAT1	lobule vs duct	-0.0993533	0.675617	0.986275	NS or Estimate < 0.5
PSEN1	lobule vs duct	0.20187	0.427884	0.956009	NS or Estimate < 0.5
ADA	lobule vs duct	0.339056	0.140833	0.881936	NS or Estimate < 0.5
SGCA	lobule vs duct	-0.2394	0.288834	0.941134	NS or Estimate < 0.5
AGL	lobule vs duct	0.259441	0.315698	0.944973	NS or Estimate < 0.5
ABCD1	lobule vs duct	0.282236	0.327506	0.944973	NS or Estimate < 0.5
ALDOB	lobule vs duct	0.0405424	0.91884	0.997475	NS or Estimate < 0.5
AMPD1	lobule vs duct	0.0124414	0.960693	0.997475	NS or Estimate < 0.5
APOC3	lobule vs duct	-0.155551	0.595258	0.975916	NS or Estimate < 0.5
APOE	lobule vs duct	0.0722185	0.782587	0.991441	NS or Estimate < 0.5
ASL	lobule vs duct	0.355459	0.13852	0.875857	NS or Estimate < 0.5
ASS1	lobule vs duct	-0.456375	0.0489702	0.808632	NS or Estimate < 0.5
ATM	lobule vs duct	-0.114249	0.604093	0.978494	NS or Estimate < 0.5
AVPR2	lobule vs duct	0.183103	0.400882	0.953648	NS or Estimate < 0.5
BTK	lobule vs duct	-0.242497	0.279254	0.938041	NS or Estimate < 0.5
SERPING1	lobule vs duct	-0.105658	0.613716	0.978494	NS or Estimate < 0.5
C3	lobule vs duct	-0.00834856	0.971201	0.998973	NS or Estimate < 0.5
CBS	lobule vs duct	-0.388232	0.156915	0.893362	NS or Estimate < 0.5
CD36	lobule vs duct	-0.420321	0.117792	0.868129	NS or Estimate < 0.5
CDK4	lobule vs duct	0.303795	0.200978	0.918958	NS or Estimate < 0.5
CDKN1C	lobule vs duct	-0.116581	0.64987	0.983633	NS or Estimate < 0.5
LYST	lobule vs duct	-0.0893518	0.752602	0.989599	NS or Estimate < 0.5
ERCC8	lobule vs duct	0.0928617	0.696119	0.987106	NS or Estimate < 0.5
CLN3	lobule vs duct	-0.0481609	0.828556	0.994078	NS or Estimate < 0.5
COL1A1	lobule vs duct	-0.162623	0.544857	0.970404	NS or Estimate < 0.5
COL1A2	lobule vs duct	-0.280942	0.257311	0.935075	NS or Estimate < 0.5
COL5A1	lobule vs duct	-0.285915	0.249947	0.935075	NS or Estimate < 0.5
CPOX	lobule vs duct	-0.200964	0.490769	0.960907	NS or Estimate < 0.5
CPT2	lobule vs duct	-0.0133061	0.954573	0.997475	NS or Estimate < 0.5
CST3	lobule vs duct	0.192309	0.380511	0.951498	NS or Estimate < 0.5
CSTB	lobule vs duct	0.25309	0.266692	0.936241	NS or Estimate < 0.5
CYP2D6	lobule vs duct	0.00993914	0.970086	0.998678	NS or Estimate < 0.5
DDB2	lobule vs duct	-0.235466	0.413971	0.955629	NS or Estimate < 0.5
DLD	lobule vs duct	0.334586	0.225309	0.928799	NS or Estimate < 0.5
EMD	lobule vs duct	-0.489062	0.0328621	0.792131	NS or Estimate < 0.5
EPB42	lobule vs duct	0.0646897	0.78413	0.991441	NS or Estimate < 0.5
EPHX1	lobule vs duct	-0.492133	0.0516741	0.808632	NS or Estimate < 0.5
ERCC5	lobule vs duct	-0.0767793	0.707154	0.987325	NS or Estimate < 0.5
EXT1	lobule vs duct	-0.005416	0.983309	0.99925	NS or Estimate < 0.5
F5	lobule vs duct	0.188859	0.47024	0.96068	NS or Estimate < 0.5
FABP2	lobule vs duct	-0.447416	0.16284	0.902837	NS or Estimate < 0.5
FANCA	lobule vs duct	0.0109268	0.967055	0.998582	NS or Estimate < 0.5
FAH	lobule vs duct	-0.247012	0.335712	0.944973	NS or Estimate < 0.5
FECH	lobule vs duct	-0.29979	0.223118	0.926916	NS or Estimate < 0.5
FGFR2	lobule vs duct	-0.0667853	0.793916	0.992165	NS or Estimate < 0.5
FH	lobule vs duct	-0.0572936	0.792884	0.99183	NS or Estimate < 0.5
FUCA1	lobule vs duct	-0.352355	0.122737	0.868129	NS or Estimate < 0.5
FUT1	lobule vs duct	-0.302941	0.285994	0.938041	NS or Estimate < 0.5
FUT6	lobule vs duct	-0.475374	0.104357	0.866349	NS or Estimate < 0.5
GALC	lobule vs duct	-0.314439	0.230179	0.933624	NS or Estimate < 0.5
GALT	lobule vs duct	-0.167206	0.477226	0.96068	NS or Estimate < 0.5
GBE1	lobule vs duct	-0.441612	0.0756791	0.844897	NS or Estimate < 0.5
GCDH	lobule vs duct	-0.397871	0.0846765	0.857147	NS or Estimate < 0.5
GJA1	lobule vs duct	-0.105383	0.703237	0.987325	NS or Estimate < 0.5
GK	lobule vs duct	0.221198	0.505402	0.963341	NS or Estimate < 0.5
GLI3	lobule vs duct	-0.270312	0.262143	0.935075	NS or Estimate < 0.5
GP9	lobule vs duct	-0.0187382	0.941874	0.997475	NS or Estimate < 0.5
GPI	lobule vs duct	0.172692	0.454734	0.959008	NS or Estimate < 0.5
GSN	lobule vs duct	-0.523402	0.0732073	0.840077	NS or Estimate < 0.5
MSH6	lobule vs duct	-0.255042	0.25806	0.935075	NS or Estimate < 0.5
GUSB	lobule vs duct	-0.441011	0.0543195	0.808632	NS or Estimate < 0.5
HADHA	lobule vs duct	0.0332862	0.888877	0.996894	NS or Estimate < 0.5
HADHB	lobule vs duct	0.176017	0.376952	0.949967	NS or Estimate < 0.5
HBG2	lobule vs duct	-0.172037	0.465302	0.96068	NS or Estimate < 0.5
HGD	lobule vs duct	0.412648	0.0744704	0.842887	NS or Estimate < 0.5
HK1	lobule vs duct	0.0453193	0.857255	0.994375	NS or Estimate < 0.5
HK2	lobule vs duct	-0.255869	0.364905	0.949967	NS or Estimate < 0.5
HPRT1	lobule vs duct	0.257879	0.33483	0.944973	NS or Estimate < 0.5
HPS1	lobule vs duct	0.245458	0.38887	0.952375	NS or Estimate < 0.5
HSD11B2	lobule vs duct	-0.555215	0.0101716	0.695308	P < 0.05
HSD3B2	lobule vs duct	-0.113154	0.625362	0.979657	NS or Estimate < 0.5
SGSH	lobule vs duct	-0.436236	0.0243981	0.778435	NS or Estimate < 0.5
IDS	lobule vs duct	0.0162847	0.946294	0.997475	NS or Estimate < 0.5
IDUA	lobule vs duct	-0.15771	0.583891	0.974129	NS or Estimate < 0.5
INSR	lobule vs duct	-0.37715	0.105561	0.866349	NS or Estimate < 0.5
PDX1	lobule vs duct	-0.29925	0.24627	0.935075	NS or Estimate < 0.5
ITGA6	lobule vs duct	-0.0402392	0.887386	0.996498	NS or Estimate < 0.5
JAG1	lobule vs duct	-0.317342	0.186195	0.918008	NS or Estimate < 0.5
JAK3	lobule vs duct	-0.33005	0.210116	0.925409	NS or Estimate < 0.5
KRT12	lobule vs duct	-0.120657	0.620494	0.979657	NS or Estimate < 0.5
KRT18	lobule vs duct	0.028549	0.822364	0.994078	NS or Estimate < 0.5
LAMA3	lobule vs duct	0.234908	0.282932	0.938041	NS or Estimate < 0.5
LAMB3	lobule vs duct	0.164609	0.486267	0.96068	NS or Estimate < 0.5
SGCB	lobule vs duct	-0.0508743	0.844774	0.994078	NS or Estimate < 0.5
LIPA	lobule vs duct	0.300689	0.21408	0.926916	NS or Estimate < 0.5
MLH1	lobule vs duct	-0.0360584	0.912862	0.997475	NS or Estimate < 0.5
MTM1	lobule vs duct	-0.549556	0.056956	0.809858	NS or Estimate < 0.5
MTR	lobule vs duct	-0.124128	0.559779	0.972277	NS or Estimate < 0.5
MMUT	lobule vs duct	0.280346	0.185871	0.918008	NS or Estimate < 0.5
PTCH1	lobule vs duct	-0.11662	0.652914	0.984018	NS or Estimate < 0.5
NCF1	lobule vs duct	-0.299532	0.228904	0.931396	NS or Estimate < 0.5
NDP	lobule vs duct	-0.07649	0.762036	0.990946	NS or Estimate < 0.5
NF1	lobule vs duct	0.0316258	0.901847	0.997475	NS or Estimate < 0.5
PNP	lobule vs duct	-0.00150055	0.994912	0.99925	NS or Estimate < 0.5
NPC1	lobule vs duct	-0.0697606	0.759106	0.990474	NS or Estimate < 0.5
OAT	lobule vs duct	0.272899	0.186173	0.918008	NS or Estimate < 0.5
PAX6	lobule vs duct	-0.305499	0.211607	0.926102	NS or Estimate < 0.5
PCBD1	lobule vs duct	0.158317	0.482149	0.96068	NS or Estimate < 0.5
PDHA1	lobule vs duct	-0.198644	0.384498	0.952375	NS or Estimate < 0.5
PEPD	lobule vs duct	0.508999	0.0112931	0.715241	P < 0.05
PEX12	lobule vs duct	-0.0171376	0.932903	0.997475	NS or Estimate < 0.5
PEX6	lobule vs duct	-0.263111	0.321971	0.944973	NS or Estimate < 0.5
PEX7	lobule vs duct	0.475116	0.0520101	0.808632	NS or Estimate < 0.5
PFKM	lobule vs duct	0.269637	0.278879	0.938041	NS or Estimate < 0.5
PGK1	lobule vs duct	0.222601	0.28114	0.938041	NS or Estimate < 0.5
PHKA2	lobule vs duct	0.285282	0.239406	0.935075	NS or Estimate < 0.5
PHKB	lobule vs duct	-0.257913	0.373772	0.949967	NS or Estimate < 0.5
PHKG2	lobule vs duct	-0.194823	0.311015	0.943913	NS or Estimate < 0.5
SERPINA1	lobule vs duct	-0.039861	0.910422	0.997475	NS or Estimate < 0.5
PKD2	lobule vs duct	0.125525	0.598382	0.977506	NS or Estimate < 0.5
PKP1	lobule vs duct	-0.811952	0.00320511	0.60835	P < 0.05
PLA2G2A	lobule vs duct	0.278845	0.289206	0.941309	NS or Estimate < 0.5
PLOD1	lobule vs duct	-0.292729	0.221725	0.926916	NS or Estimate < 0.5
PMM2	lobule vs duct	0.0909948	0.749041	0.989599	NS or Estimate < 0.5
PMP22	lobule vs duct	0.115076	0.640202	0.981911	NS or Estimate < 0.5
PON2	lobule vs duct	0.0678918	0.783564	0.991441	NS or Estimate < 0.5
POU3F4	lobule vs duct	-0.344842	0.200294	0.918958	NS or Estimate < 0.5
PRNP	lobule vs duct	-0.047044	0.799571	0.992712	NS or Estimate < 0.5
PROC	lobule vs duct	0.37927	0.122787	0.868129	NS or Estimate < 0.5
PROS1	lobule vs duct	-0.301888	0.270617	0.937608	NS or Estimate < 0.5
PTH	lobule vs duct	-0.0248068	0.922384	0.997475	NS or Estimate < 0.5
PTH1R	lobule vs duct	-0.154442	0.601844	0.978389	NS or Estimate < 0.5
PTS	lobule vs duct	0.114239	0.674339	0.986018	NS or Estimate < 0.5
QDPR	lobule vs duct	0.256186	0.216673	0.926916	NS or Estimate < 0.5
RB1	lobule vs duct	0.107809	0.644314	0.982477	NS or Estimate < 0.5
PITX2	lobule vs duct	-0.665916	0.0135805	0.715241	P < 0.05
RS1	lobule vs duct	0.466728	0.0731366	0.840077	NS or Estimate < 0.5
ATXN1	lobule vs duct	-0.0479638	0.863682	0.994392	NS or Estimate < 0.5
SGCD	lobule vs duct	-0.232158	0.324699	0.944973	NS or Estimate < 0.5
SLC2A2	lobule vs duct	0.236522	0.329161	0.944973	NS or Estimate < 0.5
SLC3A1	lobule vs duct	-0.35329	0.270107	0.937608	NS or Estimate < 0.5
SLC5A1	lobule vs duct	-0.56454	0.0315663	0.792131	P < 0.05
SMN1	lobule vs duct	0.285379	0.328196	0.944973	NS or Estimate < 0.5
SNCA	lobule vs duct	-0.125971	0.564174	0.97324	NS or Estimate < 0.5
TCOF1	lobule vs duct	0.347611	0.150657	0.891664	NS or Estimate < 0.5
TIMP3	lobule vs duct	-0.125889	0.612544	0.978494	NS or Estimate < 0.5
TPI1	lobule vs duct	-0.0650403	0.788208	0.99183	NS or Estimate < 0.5
TPM1	lobule vs duct	0.277835	0.103022	0.866349	NS or Estimate < 0.5
TPMT	lobule vs duct	-0.017153	0.947175	0.997475	NS or Estimate < 0.5
TSC1	lobule vs duct	-0.476521	0.0504334	0.808632	NS or Estimate < 0.5
UROS	lobule vs duct	0.124972	0.710193	0.987325	NS or Estimate < 0.5
XDH	lobule vs duct	0.0216803	0.937157	0.997475	NS or Estimate < 0.5
XPA	lobule vs duct	0.129547	0.531681	0.965823	NS or Estimate < 0.5
AIRE	lobule vs duct	-0.332751	0.153118	0.89277	NS or Estimate < 0.5
APOB	lobule vs duct	-0.16911	0.583575	0.974129	NS or Estimate < 0.5
BLMH	lobule vs duct	-0.386504	0.134256	0.87348	NS or Estimate < 0.5
TPP1	lobule vs duct	0.0408964	0.860137	0.994375	NS or Estimate < 0.5
COL5A2	lobule vs duct	-0.226622	0.354615	0.949967	NS or Estimate < 0.5
CTSK	lobule vs duct	-0.124651	0.617786	0.979657	NS or Estimate < 0.5
CYBB	lobule vs duct	0.348978	0.144534	0.88826	NS or Estimate < 0.5
CYB5R3	lobule vs duct	0.108506	0.628612	0.980053	NS or Estimate < 0.5
ERCC2	lobule vs duct	-0.235271	0.365092	0.949967	NS or Estimate < 0.5
G6PD	lobule vs duct	0.272267	0.276133	0.938041	NS or Estimate < 0.5
GM2A	lobule vs duct	-0.000321673	0.998785	0.999856	NS or Estimate < 0.5
HLCS	lobule vs duct	0.197735	0.462495	0.960096	NS or Estimate < 0.5
HSD17B4	lobule vs duct	0.173221	0.436009	0.956132	NS or Estimate < 0.5
IFNGR1	lobule vs duct	0.306751	0.0933239	0.863456	NS or Estimate < 0.5
IL2RA	lobule vs duct	-0.305502	0.209466	0.924922	NS or Estimate < 0.5
KRT17	lobule vs duct	1.24565	8.72277e-05	0.127976	P < 0.05
LTBP2	lobule vs duct	0.213215	0.357386	0.949967	NS or Estimate < 0.5
PAFAH1B1	lobule vs duct	-0.40979	0.147	0.890704	NS or Estimate < 0.5
MVK	lobule vs duct	0.231393	0.401143	0.953648	NS or Estimate < 0.5
NOTCH3	lobule vs duct	0.000237757	0.999281	0.999867	NS or Estimate < 0.5
PAFAH2	lobule vs duct	0.0265131	0.920107	0.997475	NS or Estimate < 0.5
PLEC	lobule vs duct	-0.388123	0.0534619	0.808632	NS or Estimate < 0.5
PSEN2	lobule vs duct	0.718461	0.00430937	0.663046	P < 0.05
SLC10A2	lobule vs duct	0.321413	0.203419	0.918958	NS or Estimate < 0.5
SLC5A5	lobule vs duct	-0.173852	0.453111	0.958153	NS or Estimate < 0.5
AK1	lobule vs duct	-0.15379	0.477354	0.96068	NS or Estimate < 0.5
ALPL	lobule vs duct	-0.324574	0.201973	0.918958	NS or Estimate < 0.5
AMH	lobule vs duct	-0.278179	0.204622	0.918958	NS or Estimate < 0.5
AMPD3	lobule vs duct	-0.148067	0.519581	0.965306	NS or Estimate < 0.5
APP	lobule vs duct	0.0485005	0.794514	0.992165	NS or Estimate < 0.5
APRT	lobule vs duct	0.0962055	0.703726	0.987325	NS or Estimate < 0.5
AQP2	lobule vs duct	0.141975	0.476732	0.96068	NS or Estimate < 0.5
ARSA	lobule vs duct	0.454473	0.0450984	0.808632	NS or Estimate < 0.5
ATRX	lobule vs duct	0.0763364	0.646811	0.982694	NS or Estimate < 0.5
C1QB	lobule vs duct	0.137664	0.504912	0.962968	NS or Estimate < 0.5
COL4A5	lobule vs duct	0.262849	0.21157	0.926102	NS or Estimate < 0.5
F12	lobule vs duct	0.148051	0.544802	0.970404	NS or Estimate < 0.5
FUT2	lobule vs duct	-0.141754	0.536616	0.967699	NS or Estimate < 0.5
HEXA	lobule vs duct	0.334218	0.151147	0.891664	NS or Estimate < 0.5
HEXB	lobule vs duct	0.137676	0.599519	0.978384	NS or Estimate < 0.5
KCNJ11	lobule vs duct	-0.339122	0.331276	0.944973	NS or Estimate < 0.5
KRT14	lobule vs duct	0.89156	0.0094243	0.69134	P < 0.05
LDLR	lobule vs duct	-0.0327569	0.889142	0.996894	NS or Estimate < 0.5
PMS1	lobule vs duct	0.0995525	0.685252	0.986766	NS or Estimate < 0.5
TSC2	lobule vs duct	-0.423924	0.103929	0.866349	NS or Estimate < 0.5
VHL	lobule vs duct	0.0149745	0.952456	0.997475	NS or Estimate < 0.5
VWF	lobule vs duct	0.102746	0.750501	0.989599	NS or Estimate < 0.5
WRN	lobule vs duct	-0.0598392	0.833712	0.994078	NS or Estimate < 0.5
DCX	lobule vs duct	-0.0804958	0.74034	0.989227	NS or Estimate < 0.5
FCGR1A	lobule vs duct	-0.0246828	0.912947	0.997475	NS or Estimate < 0.5
FCGR3A	lobule vs duct	0.365103	0.135061	0.874513	NS or Estimate < 0.5
CR1	lobule vs duct	-0.371338	0.148609	0.891431	NS or Estimate < 0.5
CD55	lobule vs duct	0.623213	0.00601732	0.663046	P < 0.05
SLC11A1	lobule vs duct	0.0968901	0.714578	0.988295	NS or Estimate < 0.5
GPX1	lobule vs duct	0.0668706	0.761904	0.990946	NS or Estimate < 0.5
C7	lobule vs duct	0.145165	0.48354	0.96068	NS or Estimate < 0.5
CD14	lobule vs duct	-0.173078	0.446925	0.957465	NS or Estimate < 0.5
IGFBP2	lobule vs duct	-0.209631	0.409784	0.955629	NS or Estimate < 0.5
ORM2	lobule vs duct	0.100173	0.626791	0.979726	NS or Estimate < 0.5
CD59	lobule vs duct	-0.0344646	0.869955	0.995651	NS or Estimate < 0.5
HPX	lobule vs duct	0.186702	0.471767	0.96068	NS or Estimate < 0.5
CD4	lobule vs duct	-0.302607	0.201833	0.918958	NS or Estimate < 0.5
SLC11A2	lobule vs duct	0.0824153	0.696315	0.987106	NS or Estimate < 0.5
IGF1	lobule vs duct	-0.595801	0.0123454	0.715241	P < 0.05
SERPINA5	lobule vs duct	-0.19283	0.604344	0.978494	NS or Estimate < 0.5
NOS2	lobule vs duct	0.427994	0.194055	0.918958	NS or Estimate < 0.5
IFNAR1	lobule vs duct	0.0595629	0.82152	0.994078	NS or Estimate < 0.5
RFX2	lobule vs duct	-0.0685253	0.70505	0.987325	NS or Estimate < 0.5
SOD2	lobule vs duct	0.436745	0.0448729	0.808632	NS or Estimate < 0.5
GSR	lobule vs duct	-0.247593	0.317287	0.944973	NS or Estimate < 0.5
IL13RA2	lobule vs duct	-0.0889416	0.731488	0.989146	NS or Estimate < 0.5
TGFB1	lobule vs duct	-0.473033	0.0813026	0.852888	NS or Estimate < 0.5
RPL9	lobule vs duct	-0.246941	0.113169	0.866349	NS or Estimate < 0.5
ACY1	lobule vs duct	0.141672	0.489969	0.960907	NS or Estimate < 0.5
ADH5	lobule vs duct	0.203697	0.419507	0.955629	NS or Estimate < 0.5
ADH7	lobule vs duct	-0.245102	0.449998	0.9575	NS or Estimate < 0.5
ADORA2B	lobule vs duct	-0.238736	0.316594	0.944973	NS or Estimate < 0.5
ADRA1D	lobule vs duct	-0.40155	0.0774202	0.846966	NS or Estimate < 0.5
ADRB1	lobule vs duct	0.268105	0.311262	0.943913	NS or Estimate < 0.5
AGTR2	lobule vs duct	0.119688	0.687302	0.986766	NS or Estimate < 0.5
ALDH2	lobule vs duct	-0.185029	0.401442	0.953648	NS or Estimate < 0.5
ALDH1B1	lobule vs duct	-0.216116	0.358115	0.949967	NS or Estimate < 0.5
ALDH1A3	lobule vs duct	0.693648	0.037083	0.795079	P < 0.05
ALDH3B2	lobule vs duct	-0.0617305	0.755539	0.989864	NS or Estimate < 0.5
ALDH9A1	lobule vs duct	-0.133644	0.528441	0.965823	NS or Estimate < 0.5
ALOX12	lobule vs duct	-0.133895	0.602871	0.978426	NS or Estimate < 0.5
ALOX5	lobule vs duct	0.438865	0.0600844	0.809858	NS or Estimate < 0.5
ANXA1	lobule vs duct	0.858764	0.000822127	0.456721	P < 0.05
ATP1A1	lobule vs duct	-0.0570372	0.771512	0.991114	NS or Estimate < 0.5
ATP4A	lobule vs duct	0.0999594	0.648234	0.983132	NS or Estimate < 0.5
AVPR1B	lobule vs duct	0.0572807	0.861335	0.994375	NS or Estimate < 0.5
BCKDHA	lobule vs duct	0.239505	0.29979	0.941452	NS or Estimate < 0.5
BLVRA	lobule vs duct	-0.0237433	0.919734	0.997475	NS or Estimate < 0.5
TSPO	lobule vs duct	0.21013	0.312011	0.9444	NS or Estimate < 0.5
CACNA2D1	lobule vs duct	0.0904523	0.727189	0.989	NS or Estimate < 0.5
CACNB3	lobule vs duct	0.125196	0.628747	0.980053	NS or Estimate < 0.5
CACNB4	lobule vs duct	0.204602	0.484872	0.96068	NS or Estimate < 0.5
CALCB	lobule vs duct	0.0336897	0.907563	0.997475	NS or Estimate < 0.5
CHRM3	lobule vs duct	0.335114	0.242473	0.935075	NS or Estimate < 0.5
CHRNA3	lobule vs duct	-0.257635	0.237877	0.935075	NS or Estimate < 0.5
CHRNB1	lobule vs duct	-0.0194807	0.948456	0.997475	NS or Estimate < 0.5
CHRNB4	lobule vs duct	0.0613555	0.808994	0.993639	NS or Estimate < 0.5
CYP2C8	lobule vs duct	-0.0969656	0.74812	0.989599	NS or Estimate < 0.5
CYP2C18	lobule vs duct	0.308756	0.185849	0.918008	NS or Estimate < 0.5
CYP2E1	lobule vs duct	-0.077117	0.731002	0.989146	NS or Estimate < 0.5
CYP2F1	lobule vs duct	-0.375868	0.22266	0.926916	NS or Estimate < 0.5
CYP27B1	lobule vs duct	-0.673403	0.0124586	0.715241	P < 0.05
DCK	lobule vs duct	0.00362773	0.986164	0.99925	NS or Estimate < 0.5
DDC	lobule vs duct	-0.0672061	0.807268	0.993605	NS or Estimate < 0.5
DIO1	lobule vs duct	0.085323	0.711317	0.987325	NS or Estimate < 0.5
DRD4	lobule vs duct	-0.154541	0.413186	0.955629	NS or Estimate < 0.5
DRD5	lobule vs duct	-0.251345	0.32665	0.944973	NS or Estimate < 0.5
GABRA1	lobule vs duct	0.27528	0.276838	0.938041	NS or Estimate < 0.5
GABRB1	lobule vs duct	-0.0276692	0.915794	0.997475	NS or Estimate < 0.5
GAD1	lobule vs duct	-0.0582181	0.826813	0.994078	NS or Estimate < 0.5
GART	lobule vs duct	0.0160336	0.948184	0.997475	NS or Estimate < 0.5
GAS6	lobule vs duct	-0.496933	0.0814187	0.853235	NS or Estimate < 0.5
GGCX	lobule vs duct	-0.0692681	0.790661	0.99183	NS or Estimate < 0.5
GRIA4	lobule vs duct	0.385603	0.0951341	0.864096	NS or Estimate < 0.5
GRIK3	lobule vs duct	0.493286	0.0593401	0.809858	NS or Estimate < 0.5
GRIN2A	lobule vs duct	-0.0467315	0.862847	0.994392	NS or Estimate < 0.5
GRIN2B	lobule vs duct	-0.536629	0.0225417	0.767776	P < 0.05
GRINA	lobule vs duct	0.062665	0.76319	0.990946	NS or Estimate < 0.5
GRM4	lobule vs duct	-0.0302645	0.889894	0.996894	NS or Estimate < 0.5
GRM6	lobule vs duct	0.359938	0.157636	0.894929	NS or Estimate < 0.5
GSTA2	lobule vs duct	0.548411	0.0319801	0.792131	P < 0.05
GSTM2	lobule vs duct	-0.268912	0.279288	0.938041	NS or Estimate < 0.5
GSTM3	lobule vs duct	0.18076	0.39784	0.953294	NS or Estimate < 0.5
GSTM4	lobule vs duct	-0.691218	0.00738198	0.665798	P < 0.05
GSTT2	lobule vs duct	0.10463	0.662182	0.985424	NS or Estimate < 0.5
GUK1	lobule vs duct	-0.217915	0.410716	0.955629	NS or Estimate < 0.5
HMGCR	lobule vs duct	0.245022	0.350836	0.949841	NS or Estimate < 0.5
HRH1	lobule vs duct	-0.425465	0.12488	0.868129	NS or Estimate < 0.5
HSD3B1	lobule vs duct	-0.491761	0.0587339	0.809858	NS or Estimate < 0.5
HTR1B	lobule vs duct	0.273029	0.297581	0.941452	NS or Estimate < 0.5
HTR2C	lobule vs duct	-0.316511	0.194816	0.918958	NS or Estimate < 0.5
ICAM2	lobule vs duct	-0.573774	0.0242263	0.778435	P < 0.05
IGF1R	lobule vs duct	0.0207747	0.915745	0.997475	NS or Estimate < 0.5
IGF2R	lobule vs duct	-0.226137	0.251166	0.935075	NS or Estimate < 0.5
IL2RB	lobule vs duct	-0.0786356	0.778607	0.991114	NS or Estimate < 0.5
IL7	lobule vs duct	-0.127443	0.579278	0.974129	NS or Estimate < 0.5
IMPDH1	lobule vs duct	-0.133445	0.560445	0.972277	NS or Estimate < 0.5
IMPDH2	lobule vs duct	-0.318442	0.106225	0.866349	NS or Estimate < 0.5
ITGA4	lobule vs duct	0.362978	0.210134	0.925409	NS or Estimate < 0.5
ITGAX	lobule vs duct	0.55004	0.0179395	0.739596	P < 0.05
ITGB6	lobule vs duct	-0.147558	0.498409	0.962968	NS or Estimate < 0.5
KLKB1	lobule vs duct	0.071482	0.79284	0.99183	NS or Estimate < 0.5
CYP4F3	lobule vs duct	-0.10045	0.676948	0.986275	NS or Estimate < 0.5
MAOB	lobule vs duct	-0.135872	0.587027	0.974129	NS or Estimate < 0.5
NQO2	lobule vs duct	-0.319922	0.100897	0.864808	NS or Estimate < 0.5
NPY	lobule vs duct	-0.156719	0.568623	0.973739	NS or Estimate < 0.5
OXT	lobule vs duct	-0.315014	0.21123	0.926102	NS or Estimate < 0.5
OXTR	lobule vs duct	0.491281	0.0570833	0.809858	NS or Estimate < 0.5
P4HA1	lobule vs duct	0.347632	0.213143	0.926639	NS or Estimate < 0.5
P4HB	lobule vs duct	0.00755713	0.967732	0.998582	NS or Estimate < 0.5
PAM	lobule vs duct	0.178714	0.453279	0.958153	NS or Estimate < 0.5
PC	lobule vs duct	0.596004	0.0171809	0.739596	P < 0.05
PDE4C	lobule vs duct	0.1568	0.531228	0.965823	NS or Estimate < 0.5
PDHB	lobule vs duct	0.353987	0.135951	0.874648	NS or Estimate < 0.5
PGR	lobule vs duct	0.132856	0.62753	0.979726	NS or Estimate < 0.5
ABCB1	lobule vs duct	0.212914	0.334251	0.944973	NS or Estimate < 0.5
PLA2G1B	lobule vs duct	0.140171	0.591045	0.974353	NS or Estimate < 0.5
PLA2G5	lobule vs duct	-0.37584	0.129669	0.87139	NS or Estimate < 0.5
PLAT	lobule vs duct	0.294702	0.241293	0.935075	NS or Estimate < 0.5
POLR2A	lobule vs duct	0.0566049	0.773513	0.991114	NS or Estimate < 0.5
POLR2B	lobule vs duct	0.0128658	0.960024	0.997475	NS or Estimate < 0.5
POR	lobule vs duct	0.521865	0.0626527	0.822818	NS or Estimate < 0.5
PPIB	lobule vs duct	0.17047	0.502146	0.962968	NS or Estimate < 0.5
PPIC	lobule vs duct	0.343629	0.152246	0.891664	NS or Estimate < 0.5
PPP3R1	lobule vs duct	-0.471594	0.0499214	0.808632	NS or Estimate < 0.5
PRRG1	lobule vs duct	-0.00117611	0.996316	0.99925	NS or Estimate < 0.5
PTGDR	lobule vs duct	0.170842	0.486569	0.96068	NS or Estimate < 0.5
PTGDS	lobule vs duct	0.144988	0.58488	0.974129	NS or Estimate < 0.5
PTGER2	lobule vs duct	-0.306809	0.251124	0.935075	NS or Estimate < 0.5
PTGER3	lobule vs duct	-0.13031	0.614911	0.978494	NS or Estimate < 0.5
PTGS2	lobule vs duct	-0.175224	0.425434	0.956009	NS or Estimate < 0.5
RARB	lobule vs duct	0.447598	0.0968758	0.864096	NS or Estimate < 0.5
RPL4	lobule vs duct	-0.201444	0.252001	0.935075	NS or Estimate < 0.5
RPL5	lobule vs duct	-0.00374181	0.976259	0.998973	NS or Estimate < 0.5
RPL6	lobule vs duct	-0.222766	0.135556	0.874648	NS or Estimate < 0.5
RPL7	lobule vs duct	-0.24668	0.115912	0.868129	NS or Estimate < 0.5
RPL7A	lobule vs duct	-0.170186	0.314515	0.944973	NS or Estimate < 0.5
RPL12	lobule vs duct	-0.297335	0.060155	0.809858	NS or Estimate < 0.5
RPL23	lobule vs duct	-0.348109	0.0395811	0.798366	NS or Estimate < 0.5
RPL18A	lobule vs duct	-0.18934	0.150114	0.891617	NS or Estimate < 0.5
RPL19	lobule vs duct	-0.156563	0.354702	0.949967	NS or Estimate < 0.5
RPL21	lobule vs duct	-0.143662	0.299054	0.941452	NS or Estimate < 0.5
RPL17	lobule vs duct	-0.268927	0.114038	0.866349	NS or Estimate < 0.5
RPL24	lobule vs duct	-0.127916	0.345044	0.946017	NS or Estimate < 0.5
RPL26	lobule vs duct	0.00409648	0.980157	0.99925	NS or Estimate < 0.5
RPL27	lobule vs duct	0.0868666	0.451119	0.9575	NS or Estimate < 0.5
RPL30	lobule vs duct	-0.256391	0.065339	0.824341	NS or Estimate < 0.5
RPL28	lobule vs duct	-0.187187	0.349709	0.949841	NS or Estimate < 0.5
RPL29	lobule vs duct	-0.117478	0.563046	0.97324	NS or Estimate < 0.5
RPL34	lobule vs duct	-0.130342	0.336811	0.944973	NS or Estimate < 0.5
RPL35A	lobule vs duct	-0.321514	0.0280076	0.792131	NS or Estimate < 0.5
RPL37	lobule vs duct	-0.249705	0.0311434	0.792131	NS or Estimate < 0.5
RPL37A	lobule vs duct	-0.180346	0.171952	0.91575	NS or Estimate < 0.5
RPL39	lobule vs duct	-0.248964	0.0688067	0.837286	NS or Estimate < 0.5
RPL36AL	lobule vs duct	-0.0790371	0.728368	0.989	NS or Estimate < 0.5
SLC2A9	lobule vs duct	-0.100337	0.669368	0.986018	NS or Estimate < 0.5
CLDN20	lobule vs duct	-0.168065	0.45205	0.957623	NS or Estimate < 0.5
CD44	lobule vs duct	-0.0664872	0.74176	0.989227	NS or Estimate < 0.5
TSR3	lobule vs duct	-0.245239	0.330929	0.944973	NS or Estimate < 0.5
NCCRP1	lobule vs duct	0.0301277	0.90527	0.997475	NS or Estimate < 0.5
STX16	lobule vs duct	-0.328471	0.102816	0.866349	NS or Estimate < 0.5
UBE2W	lobule vs duct	-0.0215529	0.928687	0.997475	NS or Estimate < 0.5
NDUFV3	lobule vs duct	-0.206563	0.391412	0.952614	NS or Estimate < 0.5
RORC	lobule vs duct	0.175927	0.372213	0.949967	NS or Estimate < 0.5
TM6SF2	lobule vs duct	-0.657571	0.0135034	0.715241	P < 0.05
GRB10	lobule vs duct	0.495768	0.0841303	0.857052	NS or Estimate < 0.5
GDF6	lobule vs duct	0.25503	0.262445	0.935075	NS or Estimate < 0.5
GGA1	lobule vs duct	0.0493273	0.860291	0.994375	NS or Estimate < 0.5
ALKBH2	lobule vs duct	0.411459	0.0837768	0.857052	NS or Estimate < 0.5
OR2Y1	lobule vs duct	-0.0273898	0.918214	0.997475	NS or Estimate < 0.5
OR2A14	lobule vs duct	0.0375677	0.872132	0.995651	NS or Estimate < 0.5
ETFRF1	lobule vs duct	-0.094033	0.711191	0.987325	NS or Estimate < 0.5
ZNF425	lobule vs duct	-0.0290551	0.911527	0.997475	NS or Estimate < 0.5
SPOPL	lobule vs duct	-0.0018413	0.993522	0.99925	NS or Estimate < 0.5
ZNF470	lobule vs duct	0.136256	0.485189	0.96068	NS or Estimate < 0.5
ARHGEF37	lobule vs duct	0.0331012	0.884017	0.996428	NS or Estimate < 0.5
MED11	lobule vs duct	-0.319039	0.201978	0.918958	NS or Estimate < 0.5
C4orf3	lobule vs duct	0.194282	0.359673	0.949967	NS or Estimate < 0.5
ATP1B1	lobule vs duct	-0.158688	0.235935	0.935075	NS or Estimate < 0.5
TOMM5	lobule vs duct	-0.220613	0.392319	0.952614	NS or Estimate < 0.5
DENND6B	lobule vs duct	-0.384129	0.11202	0.866349	NS or Estimate < 0.5
C8orf82	lobule vs duct	-0.37528	0.09517	0.864096	NS or Estimate < 0.5
OR2T27	lobule vs duct	-0.256093	0.370407	0.949967	NS or Estimate < 0.5
OR2T35	lobule vs duct	-0.190443	0.499135	0.962968	NS or Estimate < 0.5
STX19	lobule vs duct	0.13228	0.592274	0.975471	NS or Estimate < 0.5
PIM3	lobule vs duct	-0.144063	0.60714	0.978494	NS or Estimate < 0.5
TTC3	lobule vs duct	-0.255638	0.122552	0.868129	NS or Estimate < 0.5
OR4C15	lobule vs duct	0.0652119	0.810417	0.993639	NS or Estimate < 0.5
PPARA	lobule vs duct	0.146432	0.554059	0.971684	NS or Estimate < 0.5
AFAP1L2	lobule vs duct	0.284262	0.179744	0.917026	NS or Estimate < 0.5
ATP5F1A	lobule vs duct	-0.300136	0.24188	0.935075	NS or Estimate < 0.5
OR4C13	lobule vs duct	-0.0702692	0.748823	0.989599	NS or Estimate < 0.5
PLEKHA1	lobule vs duct	0.0308083	0.877282	0.995971	NS or Estimate < 0.5
PAMR1	lobule vs duct	0.0212561	0.949641	0.997475	NS or Estimate < 0.5
EXOSC10	lobule vs duct	0.0869272	0.730356	0.989146	NS or Estimate < 0.5
RPLP0	lobule vs duct	-0.267481	0.0480966	0.808632	NS or Estimate < 0.5
GMPR2	lobule vs duct	0.245586	0.358992	0.949967	NS or Estimate < 0.5
HCFC1R1	lobule vs duct	0.10854	0.632239	0.980053	NS or Estimate < 0.5
PFKL	lobule vs duct	0.298945	0.196563	0.918958	NS or Estimate < 0.5
ATP5MC1	lobule vs duct	-0.286609	0.384917	0.952375	NS or Estimate < 0.5
C4B	lobule vs duct	0.550816	0.0159345	0.730568	P < 0.05
ECHDC1	lobule vs duct	-0.0103233	0.96963	0.998678	NS or Estimate < 0.5
ATP5MC2	lobule vs duct	0.0184341	0.907729	0.997475	NS or Estimate < 0.5
DEFB108B	lobule vs duct	-0.466531	0.0398606	0.798735	NS or Estimate < 0.5
ASTL	lobule vs duct	0.0349494	0.890701	0.996894	NS or Estimate < 0.5
AFTPH	lobule vs duct	-0.0336958	0.890491	0.996894	NS or Estimate < 0.5
SUMO4	lobule vs duct	-0.111307	0.61092	0.978494	NS or Estimate < 0.5
LCLAT1	lobule vs duct	0.116011	0.601583	0.978389	NS or Estimate < 0.5
ATP5MC3	lobule vs duct	-0.276089	0.238372	0.935075	NS or Estimate < 0.5
EPSTI1	lobule vs duct	0.187294	0.344978	0.946017	NS or Estimate < 0.5
EXOSC3	lobule vs duct	-0.145555	0.581267	0.974129	NS or Estimate < 0.5
GATA3	lobule vs duct	0.192097	0.352036	0.949841	NS or Estimate < 0.5
SFR1	lobule vs duct	0.0050736	0.986178	0.99925	NS or Estimate < 0.5
ZNF787	lobule vs duct	0.329103	0.121526	0.868129	NS or Estimate < 0.5
ANXA2	lobule vs duct	0.514283	0.0244281	0.778435	P < 0.05
THOC5	lobule vs duct	-0.278132	0.280276	0.938041	NS or Estimate < 0.5
CBY1	lobule vs duct	0.210089	0.405006	0.953648	NS or Estimate < 0.5
OR8G1	lobule vs duct	-0.0130754	0.955433	0.997475	NS or Estimate < 0.5
PTRH1	lobule vs duct	0.410475	0.084848	0.857666	NS or Estimate < 0.5
KCTD11	lobule vs duct	-0.161486	0.516524	0.965306	NS or Estimate < 0.5
ALKAL2	lobule vs duct	0.100552	0.696247	0.987106	NS or Estimate < 0.5
TWISTNB	lobule vs duct	0.0739613	0.763662	0.991114	NS or Estimate < 0.5
RPLP1	lobule vs duct	-0.23087	0.142267	0.884969	NS or Estimate < 0.5
BICD1	lobule vs duct	0.433164	0.0932609	0.863456	NS or Estimate < 0.5
SMAD2	lobule vs duct	0.189287	0.363281	0.949967	NS or Estimate < 0.5
LDLRAD4	lobule vs duct	0.188494	0.437522	0.956332	NS or Estimate < 0.5
HMGXB4	lobule vs duct	0.236039	0.393964	0.952751	NS or Estimate < 0.5
UQCR10	lobule vs duct	0.0394646	0.874761	0.995651	NS or Estimate < 0.5
BRPF1	lobule vs duct	0.432423	0.13931	0.877737	NS or Estimate < 0.5
ARHGEF35	lobule vs duct	-0.0711574	0.808823	0.993639	NS or Estimate < 0.5
ATP5PF	lobule vs duct	-0.270815	0.31066	0.943913	NS or Estimate < 0.5
MTFP1	lobule vs duct	-0.0791753	0.760126	0.990791	NS or Estimate < 0.5
GLE1	lobule vs duct	0.0211067	0.933938	0.997475	NS or Estimate < 0.5
ERLIN2	lobule vs duct	0.0869886	0.71596	0.988295	NS or Estimate < 0.5
RBMS3	lobule vs duct	0.0136604	0.96378	0.997885	NS or Estimate < 0.5
GTF2IRD2B	lobule vs duct	0.404854	0.0984501	0.864096	NS or Estimate < 0.5
SMARCD3	lobule vs duct	0.176348	0.488841	0.96068	NS or Estimate < 0.5
DMAC2L	lobule vs duct	0.315719	0.152138	0.891664	NS or Estimate < 0.5
SP5	lobule vs duct	0.0567568	0.825486	0.994078	NS or Estimate < 0.5
MED15	lobule vs duct	-0.258058	0.282158	0.938041	NS or Estimate < 0.5
MANBAL	lobule vs duct	0.280962	0.319021	0.944973	NS or Estimate < 0.5
TXNDC8	lobule vs duct	-0.122361	0.556565	0.972277	NS or Estimate < 0.5
BMF	lobule vs duct	0.0570974	0.820919	0.994078	NS or Estimate < 0.5
RPLP2	lobule vs duct	-0.225386	0.06369	0.824341	NS or Estimate < 0.5
NOMO3	lobule vs duct	0.0636542	0.821845	0.994078	NS or Estimate < 0.5
GRK6	lobule vs duct	-0.0960606	0.738787	0.989227	NS or Estimate < 0.5
OR10AD1	lobule vs duct	0.35622	0.18164	0.918008	NS or Estimate < 0.5
OR52M1	lobule vs duct	-0.229613	0.520156	0.965306	NS or Estimate < 0.5
ZNF740	lobule vs duct	-0.0153146	0.952551	0.997475	NS or Estimate < 0.5
RTP2	lobule vs duct	0.15572	0.431158	0.956009	NS or Estimate < 0.5
TMEM220	lobule vs duct	-0.125342	0.619648	0.979657	NS or Estimate < 0.5
VHLL	lobule vs duct	-0.070324	0.803336	0.99311	NS or Estimate < 0.5
ZNF705A	lobule vs duct	-0.52144	0.0264706	0.780642	P < 0.05
RNASEK	lobule vs duct	-0.0940332	0.696218	0.987106	NS or Estimate < 0.5
ETV3L	lobule vs duct	0.346231	0.0876727	0.861395	NS or Estimate < 0.5
TRIM67	lobule vs duct	-0.193595	0.481621	0.96068	NS or Estimate < 0.5
SPDYE3	lobule vs duct	-0.38483	0.0552122	0.809858	NS or Estimate < 0.5
METRNL	lobule vs duct	-0.189256	0.500922	0.962968	NS or Estimate < 0.5
LINGO4	lobule vs duct	0.111126	0.688591	0.986766	NS or Estimate < 0.5
OR1B1	lobule vs duct	0.0602967	0.830161	0.994078	NS or Estimate < 0.5
OR1J1	lobule vs duct	0.15983	0.509964	0.964196	NS or Estimate < 0.5
OR1J4	lobule vs duct	-0.411623	0.123326	0.868129	NS or Estimate < 0.5
OR1L8	lobule vs duct	-0.181348	0.434169	0.956132	NS or Estimate < 0.5
OR1N2	lobule vs duct	-0.100075	0.687111	0.986766	NS or Estimate < 0.5
OR10J5	lobule vs duct	0.388484	0.137116	0.874648	NS or Estimate < 0.5
OR10R2	lobule vs duct	0.216566	0.427255	0.956009	NS or Estimate < 0.5
OR10T2	lobule vs duct	0.197493	0.502034	0.962968	NS or Estimate < 0.5
OR13C8	lobule vs duct	-0.435909	0.082483	0.857052	NS or Estimate < 0.5
OR2B11	lobule vs duct	0.0751647	0.773158	0.991114	NS or Estimate < 0.5
OR2M2	lobule vs duct	-0.090107	0.724197	0.989	NS or Estimate < 0.5
OR2T12	lobule vs duct	0.353414	0.128435	0.87139	NS or Estimate < 0.5
OR4C3	lobule vs duct	0.152864	0.554423	0.972157	NS or Estimate < 0.5
OR4C46	lobule vs duct	-0.426425	0.102073	0.866349	NS or Estimate < 0.5
OR4D2	lobule vs duct	-0.0740997	0.79502	0.992165	NS or Estimate < 0.5
OR4D6	lobule vs duct	0.248616	0.270597	0.937608	NS or Estimate < 0.5
OR4D9	lobule vs duct	-0.00500584	0.981459	0.99925	NS or Estimate < 0.5
OR4M2	lobule vs duct	-0.19245	0.426165	0.956009	NS or Estimate < 0.5
NCK2	lobule vs duct	0.191229	0.340603	0.946017	NS or Estimate < 0.5
OR4N5	lobule vs duct	0.00510896	0.985747	0.99925	NS or Estimate < 0.5
OR5A1	lobule vs duct	-0.295664	0.303378	0.941452	NS or Estimate < 0.5
OR5L1	lobule vs duct	0.268603	0.341	0.946017	NS or Estimate < 0.5
OR5T1	lobule vs duct	0.116597	0.660709	0.985406	NS or Estimate < 0.5
OR51A2	lobule vs duct	-0.351687	0.113945	0.866349	NS or Estimate < 0.5
OR51D1	lobule vs duct	-0.161205	0.620231	0.979657	NS or Estimate < 0.5
OR51L1	lobule vs duct	0.00698368	0.976762	0.998973	NS or Estimate < 0.5
OR51S1	lobule vs duct	0.225417	0.350322	0.949841	NS or Estimate < 0.5
RPS3	lobule vs duct	-0.190828	0.15246	0.891664	NS or Estimate < 0.5
SFMBT1	lobule vs duct	0.0851249	0.731668	0.989146	NS or Estimate < 0.5
OR52E2	lobule vs duct	-0.413933	0.0764927	0.845619	NS or Estimate < 0.5
OR52E4	lobule vs duct	-0.0711859	0.784076	0.991441	NS or Estimate < 0.5
OR52E8	lobule vs duct	-0.0211641	0.931515	0.997475	NS or Estimate < 0.5
OR52I2	lobule vs duct	0.197702	0.449983	0.9575	NS or Estimate < 0.5
OR52L1	lobule vs duct	0.525011	0.036901	0.794493	P < 0.05
OR56A4	lobule vs duct	0.0696421	0.778542	0.991114	NS or Estimate < 0.5
OR7A10	lobule vs duct	-0.406945	0.125972	0.871201	NS or Estimate < 0.5
OR8K3	lobule vs duct	-0.363279	0.144606	0.88826	NS or Estimate < 0.5
OR8J1	lobule vs duct	0.205126	0.425855	0.956009	NS or Estimate < 0.5
TMEM198	lobule vs duct	-0.222607	0.244981	0.935075	NS or Estimate < 0.5
OR9Q1	lobule vs duct	-0.181552	0.442412	0.957465	NS or Estimate < 0.5
FRG2	lobule vs duct	-0.108141	0.666878	0.986018	NS or Estimate < 0.5
OR9K2	lobule vs duct	0.320193	0.224974	0.928799	NS or Estimate < 0.5
OR4C12	lobule vs duct	-0.0934626	0.70732	0.987325	NS or Estimate < 0.5
CHD3	lobule vs duct	-0.0438488	0.827552	0.994078	NS or Estimate < 0.5
OR6B1	lobule vs duct	0.341513	0.177565	0.916296	NS or Estimate < 0.5
OR9Q2	lobule vs duct	0.267331	0.276594	0.938041	NS or Estimate < 0.5
OR9G4	lobule vs duct	0.000539658	0.99786	0.999612	NS or Estimate < 0.5
SREBF1	lobule vs duct	-0.372365	0.0833625	0.857052	NS or Estimate < 0.5
HNRNPL	lobule vs duct	0.443443	0.0877672	0.861395	NS or Estimate < 0.5
RGS10	lobule vs duct	0.294457	0.303361	0.941452	NS or Estimate < 0.5
AK4	lobule vs duct	0.353573	0.150174	0.891617	NS or Estimate < 0.5
KDM2B	lobule vs duct	-0.0783752	0.753487	0.989599	NS or Estimate < 0.5
ZNF32	lobule vs duct	-0.18425	0.388489	0.952375	NS or Estimate < 0.5
ACTR2	lobule vs duct	0.509389	0.0392908	0.798366	P < 0.05
NFASC	lobule vs duct	-0.40414	0.137424	0.874653	NS or Estimate < 0.5
SF3A1	lobule vs duct	0.510644	0.049285	0.808632	P < 0.05
MARCHF2	lobule vs duct	0.315992	0.165067	0.90721	NS or Estimate < 0.5
B4GALT2	lobule vs duct	-0.191447	0.431569	0.956009	NS or Estimate < 0.5
OR10G3	lobule vs duct	-0.278725	0.21038	0.925409	NS or Estimate < 0.5
OR5B3	lobule vs duct	-0.0807384	0.73634	0.989227	NS or Estimate < 0.5
OR4B1	lobule vs duct	0.10885	0.664865	0.985989	NS or Estimate < 0.5
NFKBIZ	lobule vs duct	-0.0347219	0.878227	0.995971	NS or Estimate < 0.5
OR2A2	lobule vs duct	0.174535	0.469958	0.96068	NS or Estimate < 0.5
OR4K15	lobule vs duct	0.154018	0.601988	0.978389	NS or Estimate < 0.5
OR5D16	lobule vs duct	-0.117342	0.677179	0.986472	NS or Estimate < 0.5
OR6C75	lobule vs duct	-0.295787	0.343405	0.946017	NS or Estimate < 0.5
OR6C70	lobule vs duct	-0.0146047	0.952513	0.997475	NS or Estimate < 0.5
CPM	lobule vs duct	-0.163745	0.487878	0.96068	NS or Estimate < 0.5
OR4F21	lobule vs duct	-0.230546	0.368138	0.949967	NS or Estimate < 0.5
OR4A47	lobule vs duct	0.0640601	0.76159	0.990946	NS or Estimate < 0.5
OR6C65	lobule vs duct	0.262828	0.347066	0.946964	NS or Estimate < 0.5
SF3B1	lobule vs duct	-0.170138	0.464235	0.96068	NS or Estimate < 0.5
OR5B2	lobule vs duct	0.306618	0.260214	0.935075	NS or Estimate < 0.5
ITGB4	lobule vs duct	0.195877	0.328358	0.944973	NS or Estimate < 0.5
CHEK2	lobule vs duct	-0.267973	0.265748	0.935869	NS or Estimate < 0.5
VPS54	lobule vs duct	0.0967864	0.669308	0.986018	NS or Estimate < 0.5
GBA	lobule vs duct	-0.0119423	0.956854	0.997475	NS or Estimate < 0.5
NUMB	lobule vs duct	0.598075	0.016904	0.739596	P < 0.05
ADAM9	lobule vs duct	0.46516	0.0537351	0.808632	NS or Estimate < 0.5
ZNF780B	lobule vs duct	-0.145002	0.478611	0.96068	NS or Estimate < 0.5
ATP8B2	lobule vs duct	0.369015	0.194505	0.918958	NS or Estimate < 0.5
ERBB2	lobule vs duct	0.229878	0.268512	0.936241	NS or Estimate < 0.5
IP6K2	lobule vs duct	-0.0907172	0.657081	0.984743	NS or Estimate < 0.5
ERBB3	lobule vs duct	-0.0567103	0.841616	0.994078	NS or Estimate < 0.5
KRTAP5-1	lobule vs duct	-0.018755	0.934296	0.997475	NS or Estimate < 0.5
RPS3A	lobule vs duct	-0.254294	0.0759623	0.844897	NS or Estimate < 0.5
YBEY	lobule vs duct	0.702972	0.0035481	0.616818	P < 0.05
LRRC37A2	lobule vs duct	0.102111	0.674801	0.986071	NS or Estimate < 0.5
TCEAL9	lobule vs duct	0.250172	0.297329	0.941452	NS or Estimate < 0.5
ARHGAP17	lobule vs duct	-0.0847225	0.664993	0.985989	NS or Estimate < 0.5
TCEAL1	lobule vs duct	0.639956	0.0182549	0.739596	P < 0.05
SLC25A25	lobule vs duct	0.652373	0.0082433	0.687519	P < 0.05
SPIN2B	lobule vs duct	-0.0413262	0.842367	0.994078	NS or Estimate < 0.5
TCEAL4	lobule vs duct	0.134593	0.626566	0.979657	NS or Estimate < 0.5
TCEAL6	lobule vs duct	-0.204329	0.463097	0.96056	NS or Estimate < 0.5
LRRC18	lobule vs duct	-0.279374	0.288735	0.941134	NS or Estimate < 0.5
ALG3	lobule vs duct	0.151161	0.605846	0.978494	NS or Estimate < 0.5
LRIF1	lobule vs duct	0.386833	0.107871	0.866349	NS or Estimate < 0.5
RPS4X	lobule vs duct	-0.0662708	0.598179	0.977506	NS or Estimate < 0.5
ATN1	lobule vs duct	0.2847	0.278072	0.938041	NS or Estimate < 0.5
SDCBP	lobule vs duct	-0.216237	0.36462	0.949967	NS or Estimate < 0.5
KLHL5	lobule vs duct	-0.103849	0.667266	0.986018	NS or Estimate < 0.5
C8orf48	lobule vs duct	-0.201338	0.39855	0.953519	NS or Estimate < 0.5
NTRK2	lobule vs duct	0.591871	0.00957631	0.692533	P < 0.05
SCP2	lobule vs duct	-0.193227	0.445468	0.957465	NS or Estimate < 0.5
ZNF483	lobule vs duct	-0.0459351	0.844959	0.994078	NS or Estimate < 0.5
IGIP	lobule vs duct	0.228664	0.370867	0.949967	NS or Estimate < 0.5
IGF2BP2	lobule vs duct	-0.00888721	0.961712	0.997515	NS or Estimate < 0.5
SPOP	lobule vs duct	-0.158582	0.509377	0.963763	NS or Estimate < 0.5
BRWD1	lobule vs duct	0.0416794	0.854948	0.994375	NS or Estimate < 0.5
ERV3-1	lobule vs duct	0.0288598	0.911249	0.997475	NS or Estimate < 0.5
SETD4	lobule vs duct	0.0426315	0.867831	0.994854	NS or Estimate < 0.5
GEMIN7	lobule vs duct	0.351539	0.079594	0.850206	NS or Estimate < 0.5
EI24	lobule vs duct	0.0411619	0.870854	0.995651	NS or Estimate < 0.5
RASL10A	lobule vs duct	-0.147817	0.637391	0.981798	NS or Estimate < 0.5
RWDD1	lobule vs duct	0.192387	0.376293	0.949967	NS or Estimate < 0.5
TULP4	lobule vs duct	0.0724756	0.767342	0.991114	NS or Estimate < 0.5
HCST	lobule vs duct	-0.0882073	0.74329	0.989227	NS or Estimate < 0.5
TRPM3	lobule vs duct	0.0313667	0.88413	0.996428	NS or Estimate < 0.5
LMBRD2	lobule vs duct	-0.0135412	0.959895	0.997475	NS or Estimate < 0.5
SS18	lobule vs duct	0.0594391	0.806891	0.993605	NS or Estimate < 0.5
IRGQ	lobule vs duct	-0.0052313	0.981365	0.99925	NS or Estimate < 0.5
TFG	lobule vs duct	0.0182493	0.932912	0.997475	NS or Estimate < 0.5
OPTN	lobule vs duct	-0.342957	0.197208	0.918958	NS or Estimate < 0.5
COA5	lobule vs duct	-0.132669	0.507145	0.963381	NS or Estimate < 0.5
C18orf25	lobule vs duct	-0.327622	0.258588	0.935075	NS or Estimate < 0.5
TRIM72	lobule vs duct	-0.0323717	0.89546	0.997221	NS or Estimate < 0.5
CISD2	lobule vs duct	-0.219871	0.306485	0.941452	NS or Estimate < 0.5
C4orf46	lobule vs duct	-0.299755	0.0449763	0.808632	NS or Estimate < 0.5
EID3	lobule vs duct	0.47102	0.053388	0.808632	NS or Estimate < 0.5
LAMTOR4	lobule vs duct	-0.261023	0.261331	0.935075	NS or Estimate < 0.5
GPX8	lobule vs duct	0.218498	0.293004	0.941452	NS or Estimate < 0.5
ZNF761	lobule vs duct	0.061239	0.775419	0.991114	NS or Estimate < 0.5
STEAP3	lobule vs duct	0.420127	0.0773164	0.846966	NS or Estimate < 0.5
SLC41A3	lobule vs duct	-0.24751	0.333438	0.944973	NS or Estimate < 0.5
KLF6	lobule vs duct	0.189675	0.425246	0.956009	NS or Estimate < 0.5
SEPTIN2	lobule vs duct	-0.0499292	0.805983	0.993139	NS or Estimate < 0.5
TMEM64	lobule vs duct	-0.305426	0.357315	0.949967	NS or Estimate < 0.5
LGMN	lobule vs duct	0.107376	0.657419	0.984743	NS or Estimate < 0.5
SLC7A2	lobule vs duct	-0.449806	0.113234	0.866349	NS or Estimate < 0.5
MXI1	lobule vs duct	-0.0344857	0.892732	0.996984	NS or Estimate < 0.5
KYAT3	lobule vs duct	-0.34265	0.20165	0.918958	NS or Estimate < 0.5
TFIP11	lobule vs duct	0.00342437	0.987741	0.99925	NS or Estimate < 0.5
ADGRL1	lobule vs duct	0.176287	0.505028	0.962986	NS or Estimate < 0.5
RBPMS	lobule vs duct	0.159744	0.438218	0.956332	NS or Estimate < 0.5
CFAP58	lobule vs duct	-0.184274	0.325919	0.944973	NS or Estimate < 0.5
WDR89	lobule vs duct	-0.172467	0.507159	0.963381	NS or Estimate < 0.5
ZNF121	lobule vs duct	0.255852	0.246177	0.935075	NS or Estimate < 0.5
FNIP1	lobule vs duct	-0.284649	0.225518	0.928799	NS or Estimate < 0.5
SULT1C3	lobule vs duct	0.0761006	0.777369	0.991114	NS or Estimate < 0.5
TDP1	lobule vs duct	-0.0648425	0.790846	0.99183	NS or Estimate < 0.5
RAB19	lobule vs duct	-0.178683	0.394602	0.952751	NS or Estimate < 0.5
CCT3	lobule vs duct	-0.355293	0.130347	0.87139	NS or Estimate < 0.5
DSP	lobule vs duct	0.0935763	0.672745	0.986018	NS or Estimate < 0.5
NIPA2	lobule vs duct	0.504115	0.0594229	0.809858	NS or Estimate < 0.5
TCP1	lobule vs duct	-0.0165427	0.947126	0.997475	NS or Estimate < 0.5
PPP2CB	lobule vs duct	0.327303	0.16037	0.895972	NS or Estimate < 0.5
SH3D19	lobule vs duct	0.136103	0.589936	0.974129	NS or Estimate < 0.5
CDKL4	lobule vs duct	0.276637	0.190592	0.918008	NS or Estimate < 0.5
CLSTN1	lobule vs duct	-0.273123	0.226464	0.929662	NS or Estimate < 0.5
CADPS2	lobule vs duct	-0.263797	0.421831	0.956009	NS or Estimate < 0.5
ARMCX6	lobule vs duct	-0.0499156	0.8488	0.994375	NS or Estimate < 0.5
SLX4IP	lobule vs duct	0.342442	0.123331	0.868129	NS or Estimate < 0.5
C20orf202	lobule vs duct	-0.0297223	0.916621	0.997475	NS or Estimate < 0.5
SPANXN5	lobule vs duct	0.0582832	0.818374	0.994078	NS or Estimate < 0.5
BRD9	lobule vs duct	0.281743	0.279621	0.938041	NS or Estimate < 0.5
KIAA0930	lobule vs duct	0.180917	0.498028	0.962968	NS or Estimate < 0.5
TMEM230	lobule vs duct	0.317209	0.166642	0.909844	NS or Estimate < 0.5
DNASE1L1	lobule vs duct	0.222424	0.394282	0.952751	NS or Estimate < 0.5
ANKRD16	lobule vs duct	-0.21434	0.367759	0.949967	NS or Estimate < 0.5
PKD1	lobule vs duct	-0.261752	0.215892	0.926916	NS or Estimate < 0.5
SSBP3	lobule vs duct	-0.0852174	0.727985	0.989	NS or Estimate < 0.5
SYTL3	lobule vs duct	-0.217834	0.349566	0.949841	NS or Estimate < 0.5
FAM168B	lobule vs duct	-0.166432	0.486179	0.96068	NS or Estimate < 0.5
C10orf62	lobule vs duct	-0.121292	0.674691	0.986071	NS or Estimate < 0.5
SSBP4	lobule vs duct	0.114899	0.626603	0.979657	NS or Estimate < 0.5
RPS6	lobule vs duct	-0.273356	0.0482074	0.808632	NS or Estimate < 0.5
LRRC38	lobule vs duct	0.285713	0.332353	0.944973	NS or Estimate < 0.5
ZNF766	lobule vs duct	0.102917	0.695241	0.987106	NS or Estimate < 0.5
TTC7B	lobule vs duct	-0.0952159	0.703921	0.987325	NS or Estimate < 0.5
PIK3R6	lobule vs duct	-0.0500763	0.842092	0.994078	NS or Estimate < 0.5
SAMD15	lobule vs duct	0.140933	0.548966	0.970778	NS or Estimate < 0.5
SPIN3	lobule vs duct	-0.244938	0.31549	0.944973	NS or Estimate < 0.5
IBA57	lobule vs duct	0.171906	0.424812	0.956009	NS or Estimate < 0.5
TDRD6	lobule vs duct	0.0456296	0.859223	0.994375	NS or Estimate < 0.5
TMEM244	lobule vs duct	0.340456	0.22338	0.926916	NS or Estimate < 0.5
ACER2	lobule vs duct	0.016131	0.947915	0.997475	NS or Estimate < 0.5
PRAMEF6	lobule vs duct	-0.0221673	0.929748	0.997475	NS or Estimate < 0.5
MTX3	lobule vs duct	-0.219876	0.34387	0.946017	NS or Estimate < 0.5
ERCC6L2	lobule vs duct	0.20412	0.392614	0.952614	NS or Estimate < 0.5
SLC6A17	lobule vs duct	-0.322657	0.15631	0.893269	NS or Estimate < 0.5
C6orf58	lobule vs duct	-0.377488	0.196664	0.918958	NS or Estimate < 0.5
MUC21	lobule vs duct	0.133136	0.629765	0.980053	NS or Estimate < 0.5
GOLGA7B	lobule vs duct	0.0904206	0.700346	0.987325	NS or Estimate < 0.5
THEMIS	lobule vs duct	-0.156749	0.567242	0.97324	NS or Estimate < 0.5
RAP1A	lobule vs duct	0.102742	0.655705	0.984358	NS or Estimate < 0.5
LIPJ	lobule vs duct	-0.00656294	0.979294	0.99925	NS or Estimate < 0.5
RAP1B	lobule vs duct	-0.0573017	0.760509	0.990791	NS or Estimate < 0.5
LDLRAD1	lobule vs duct	0.0675008	0.75049	0.989599	NS or Estimate < 0.5
C1orf189	lobule vs duct	0.395274	0.0921492	0.86201	NS or Estimate < 0.5
MYBPHL	lobule vs duct	-0.0702777	0.764866	0.991114	NS or Estimate < 0.5
HERPUD1	lobule vs duct	0.162325	0.49702	0.962912	NS or Estimate < 0.5
FYTTD1	lobule vs duct	-0.0591869	0.791733	0.99183	NS or Estimate < 0.5
MAGEA10	lobule vs duct	-0.178061	0.471015	0.96068	NS or Estimate < 0.5
MAGEA4	lobule vs duct	-0.0653695	0.778706	0.991114	NS or Estimate < 0.5
C1GALT1C1	lobule vs duct	0.45646	0.0407096	0.801321	NS or Estimate < 0.5
SLC13A3	lobule vs duct	0.250263	0.279829	0.938041	NS or Estimate < 0.5
ZMAT1	lobule vs duct	0.190458	0.491634	0.960907	NS or Estimate < 0.5
MCCD1	lobule vs duct	-0.0655302	0.816327	0.994078	NS or Estimate < 0.5
OLA1	lobule vs duct	-0.170105	0.478042	0.96068	NS or Estimate < 0.5
PNLIPRP3	lobule vs duct	-0.151179	0.492503	0.960907	NS or Estimate < 0.5
BTBD1	lobule vs duct	0.131331	0.635598	0.981625	NS or Estimate < 0.5
RPS8	lobule vs duct	-0.142706	0.323151	0.944973	NS or Estimate < 0.5
MSL1	lobule vs duct	0.423959	0.110469	0.866349	NS or Estimate < 0.5
PRAMEF8	lobule vs duct	-0.184447	0.383527	0.952375	NS or Estimate < 0.5
ROPN1B	lobule vs duct	0.0804658	0.737826	0.989227	NS or Estimate < 0.5
NTRK3	lobule vs duct	-0.320272	0.201426	0.918958	NS or Estimate < 0.5
DNAJC21	lobule vs duct	-0.34676	0.11788	0.868129	NS or Estimate < 0.5
TRIM61	lobule vs duct	-0.0910591	0.712562	0.987641	NS or Estimate < 0.5
MYLK4	lobule vs duct	-0.596706	0.0154579	0.718044	P < 0.05
FOXP4	lobule vs duct	0.522532	0.0345116	0.792131	P < 0.05
SEC61G	lobule vs duct	-0.16788	0.430231	0.956009	NS or Estimate < 0.5
KRTAP5-7	lobule vs duct	0.396091	0.074383	0.842887	NS or Estimate < 0.5
SLC45A2	lobule vs duct	0.31346	0.396378	0.952751	NS or Estimate < 0.5
GRP	lobule vs duct	-0.377421	0.13405	0.87348	NS or Estimate < 0.5
ITM2C	lobule vs duct	-0.15174	0.545558	0.970531	NS or Estimate < 0.5
DCTD	lobule vs duct	-0.0903301	0.731198	0.989146	NS or Estimate < 0.5
ABI1	lobule vs duct	-0.256332	0.291457	0.941452	NS or Estimate < 0.5
NHLRC3	lobule vs duct	-0.19569	0.461106	0.960004	NS or Estimate < 0.5
ZNF260	lobule vs duct	0.08647	0.733673	0.989227	NS or Estimate < 0.5
NUDT17	lobule vs duct	0.0584364	0.7699	0.991114	NS or Estimate < 0.5
RGMB	lobule vs duct	-0.0912521	0.756861	0.990071	NS or Estimate < 0.5
DDX60L	lobule vs duct	0.0519466	0.863183	0.994392	NS or Estimate < 0.5
SPIN4	lobule vs duct	-0.761422	0.0247538	0.778435	P < 0.05
LRRC73	lobule vs duct	-0.0529572	0.827167	0.994078	NS or Estimate < 0.5
TCEAL5	lobule vs duct	0.0852868	0.750789	0.989599	NS or Estimate < 0.5
KNOP1	lobule vs duct	0.0272351	0.901679	0.997475	NS or Estimate < 0.5
C9orf152	lobule vs duct	-0.177736	0.512397	0.965237	NS or Estimate < 0.5
RPS9	lobule vs duct	-0.221852	0.0538782	0.808632	NS or Estimate < 0.5
CXorf66	lobule vs duct	-0.135149	0.639583	0.981798	NS or Estimate < 0.5
MPST	lobule vs duct	-0.553607	0.0223478	0.767776	P < 0.05
SEH1L	lobule vs duct	-0.111044	0.636319	0.981716	NS or Estimate < 0.5
LURAP1	lobule vs duct	0.038932	0.887182	0.996498	NS or Estimate < 0.5
ZC2HC1B	lobule vs duct	-0.0891121	0.699914	0.987325	NS or Estimate < 0.5
CFAP126	lobule vs duct	-0.141476	0.56227	0.972942	NS or Estimate < 0.5
CCDC184	lobule vs duct	0.211133	0.370238	0.949967	NS or Estimate < 0.5
PRR25	lobule vs duct	-0.0739944	0.732244	0.989146	NS or Estimate < 0.5
PRR23B	lobule vs duct	0.298541	0.17923	0.916641	NS or Estimate < 0.5
ZNF793	lobule vs duct	-0.12707	0.489096	0.960791	NS or Estimate < 0.5
VSIG8	lobule vs duct	-0.0488586	0.825353	0.994078	NS or Estimate < 0.5
PTRHD1	lobule vs duct	0.162659	0.444084	0.957465	NS or Estimate < 0.5
C17orf97	lobule vs duct	-0.286321	0.309777	0.943913	NS or Estimate < 0.5
FIGNL2	lobule vs duct	0.0570423	0.797951	0.992165	NS or Estimate < 0.5
EIF2AK4	lobule vs duct	-0.115802	0.634096	0.981365	NS or Estimate < 0.5
PLIN5	lobule vs duct	0.429641	0.109087	0.866349	NS or Estimate < 0.5
PTCHD4	lobule vs duct	0.00481885	0.98492	0.99925	NS or Estimate < 0.5
RFPL4B	lobule vs duct	-0.366612	0.10912	0.866349	NS or Estimate < 0.5
MAD1L1	lobule vs duct	0.298458	0.260498	0.935075	NS or Estimate < 0.5
STAP2	lobule vs duct	-0.0875242	0.718516	0.988793	NS or Estimate < 0.5
SLTM	lobule vs duct	-0.155974	0.554846	0.972277	NS or Estimate < 0.5
EXOC6	lobule vs duct	-0.0981115	0.693675	0.986847	NS or Estimate < 0.5
RPS10	lobule vs duct	-0.181156	0.465955	0.96068	NS or Estimate < 0.5
ANXA2R	lobule vs duct	-0.241063	0.315427	0.944973	NS or Estimate < 0.5
DCUN1D2	lobule vs duct	0.0630492	0.808679	0.993639	NS or Estimate < 0.5
FLG2	lobule vs duct	-0.521058	0.0377807	0.798366	P < 0.05
AKT1	lobule vs duct	0.216332	0.381594	0.952363	NS or Estimate < 0.5
CUTA	lobule vs duct	-0.275827	0.268121	0.936241	NS or Estimate < 0.5
ODF3B	lobule vs duct	0.0572207	0.822635	0.994078	NS or Estimate < 0.5
DDX19B	lobule vs duct	-0.130938	0.60384	0.978494	NS or Estimate < 0.5
ETFB	lobule vs duct	-0.272326	0.291157	0.941452	NS or Estimate < 0.5
FBXO44	lobule vs duct	0.34722	0.174696	0.916296	NS or Estimate < 0.5
KCNMA1	lobule vs duct	0.165452	0.493147	0.960907	NS or Estimate < 0.5
ME3	lobule vs duct	0.249115	0.290463	0.941452	NS or Estimate < 0.5
TM9SF1	lobule vs duct	0.112736	0.657334	0.984743	NS or Estimate < 0.5
CFH	lobule vs duct	-0.0893727	0.73737	0.989227	NS or Estimate < 0.5
LAT	lobule vs duct	0.0104941	0.969607	0.998678	NS or Estimate < 0.5
CKMT1A	lobule vs duct	-0.0149749	0.955097	0.997475	NS or Estimate < 0.5
LLGL2	lobule vs duct	0.57368	0.0395054	0.798366	P < 0.05
ALG1L	lobule vs duct	-0.119496	0.652603	0.984018	NS or Estimate < 0.5
MPG	lobule vs duct	-0.465695	0.0783395	0.847916	NS or Estimate < 0.5
RTKN	lobule vs duct	0.00509917	0.983214	0.99925	NS or Estimate < 0.5
DNAJC25	lobule vs duct	0.287232	0.237084	0.935075	NS or Estimate < 0.5
RPS12	lobule vs duct	-0.0761546	0.605034	0.978494	NS or Estimate < 0.5
RPS13	lobule vs duct	-0.0972877	0.562194	0.972942	NS or Estimate < 0.5
KHDC3L	lobule vs duct	0.0828695	0.761277	0.990946	NS or Estimate < 0.5
MSMO1	lobule vs duct	0.383889	0.094944	0.864096	NS or Estimate < 0.5
SUGP2	lobule vs duct	-0.0144576	0.932572	0.997475	NS or Estimate < 0.5
TRIM36	lobule vs duct	0.0412111	0.880333	0.996428	NS or Estimate < 0.5
MAEA	lobule vs duct	0.13905	0.551927	0.970887	NS or Estimate < 0.5
S100PBP	lobule vs duct	-0.117533	0.60893	0.978494	NS or Estimate < 0.5
GOPC	lobule vs duct	-0.499294	0.0351895	0.792131	NS or Estimate < 0.5
ALDH18A1	lobule vs duct	-0.13001	0.565954	0.97324	NS or Estimate < 0.5
BTBD11	lobule vs duct	0.0497417	0.839901	0.994078	NS or Estimate < 0.5
ARHGAP8	lobule vs duct	-0.297109	0.201985	0.918958	NS or Estimate < 0.5
RCCD1	lobule vs duct	-0.179383	0.385938	0.952375	NS or Estimate < 0.5
DAPL1	lobule vs duct	0.199762	0.427192	0.956009	NS or Estimate < 0.5
VMAC	lobule vs duct	0.385305	0.135442	0.874648	NS or Estimate < 0.5
ERMAP	lobule vs duct	0.189744	0.498648	0.962968	NS or Estimate < 0.5
C14orf28	lobule vs duct	-0.177827	0.431352	0.956009	NS or Estimate < 0.5
OS9	lobule vs duct	-0.0804238	0.685607	0.986766	NS or Estimate < 0.5
HSP90AA1	lobule vs duct	0.101006	0.679271	0.986766	NS or Estimate < 0.5
KIAA2026	lobule vs duct	0.550433	0.0364743	0.794493	P < 0.05
TMEM30B	lobule vs duct	-0.114151	0.660443	0.985361	NS or Estimate < 0.5
ATP6AP1L	lobule vs duct	0.259137	0.325777	0.944973	NS or Estimate < 0.5
RAB28	lobule vs duct	-0.268429	0.268266	0.936241	NS or Estimate < 0.5
RNF215	lobule vs duct	-0.209833	0.456543	0.959238	NS or Estimate < 0.5
SH3PXD2B	lobule vs duct	-0.246266	0.365694	0.949967	NS or Estimate < 0.5
GNG10	lobule vs duct	0.0234192	0.897895	0.997475	NS or Estimate < 0.5
RPS15	lobule vs duct	-0.216427	0.16729	0.911209	NS or Estimate < 0.5
SORBS3	lobule vs duct	0.12843	0.590066	0.974129	NS or Estimate < 0.5
SH3BP5	lobule vs duct	-0.398352	0.0857132	0.858178	NS or Estimate < 0.5
MUC1	lobule vs duct	0.576944	0.0668687	0.829397	NS or Estimate < 0.5
MTCP1	lobule vs duct	-0.0590858	0.791352	0.99183	NS or Estimate < 0.5
EPM2A	lobule vs duct	-0.0297586	0.902249	0.997475	NS or Estimate < 0.5
DKK3	lobule vs duct	0.425827	0.0912597	0.86201	NS or Estimate < 0.5
SERBP1	lobule vs duct	0.0358253	0.85768	0.994375	NS or Estimate < 0.5
NR3C1	lobule vs duct	0.124761	0.597534	0.977177	NS or Estimate < 0.5
FPGS	lobule vs duct	-0.278488	0.196942	0.918958	NS or Estimate < 0.5
SLC26A10	lobule vs duct	0.159858	0.477547	0.96068	NS or Estimate < 0.5
VPS13C	lobule vs duct	0.0973208	0.632154	0.980053	NS or Estimate < 0.5
ICE2	lobule vs duct	0.433161	0.0677428	0.833196	NS or Estimate < 0.5
CAVIN4	lobule vs duct	0.186073	0.436343	0.956132	NS or Estimate < 0.5
RPS16	lobule vs duct	-0.165297	0.331875	0.944973	NS or Estimate < 0.5
PUM1	lobule vs duct	-0.144505	0.569761	0.97403	NS or Estimate < 0.5
MYADM	lobule vs duct	0.291544	0.218973	0.926916	NS or Estimate < 0.5
RPS17	lobule vs duct	-0.123729	0.283851	0.938041	NS or Estimate < 0.5
RPS19	lobule vs duct	-0.27183	0.0433338	0.808632	NS or Estimate < 0.5
ZNF749	lobule vs duct	-0.00351053	0.987689	0.99925	NS or Estimate < 0.5
GOLGA8A	lobule vs duct	0.0347945	0.866246	0.994603	NS or Estimate < 0.5
IQCB1	lobule vs duct	-0.127712	0.615413	0.978494	NS or Estimate < 0.5
RPS21	lobule vs duct	-0.209577	0.124137	0.868129	NS or Estimate < 0.5
S100A13	lobule vs duct	-0.120746	0.691082	0.986766	NS or Estimate < 0.5
FBLIM1	lobule vs duct	0.474893	0.0469925	0.808632	NS or Estimate < 0.5
ARF1	lobule vs duct	-0.0445677	0.839087	0.994078	NS or Estimate < 0.5
TM2D2	lobule vs duct	-0.0193011	0.941594	0.997475	NS or Estimate < 0.5
RTL5	lobule vs duct	0.350149	0.129893	0.87139	NS or Estimate < 0.5
MSS51	lobule vs duct	-0.0787743	0.768767	0.991114	NS or Estimate < 0.5
LRRC24	lobule vs duct	-0.0970741	0.692087	0.986766	NS or Estimate < 0.5
FBXO48	lobule vs duct	-0.35358	0.226486	0.929662	NS or Estimate < 0.5
ZNF688	lobule vs duct	0.443787	0.0892133	0.86201	NS or Estimate < 0.5
CD276	lobule vs duct	-0.177947	0.418685	0.955629	NS or Estimate < 0.5
SLC6A9	lobule vs duct	0.41491	0.0884379	0.86201	NS or Estimate < 0.5
TGFBR2	lobule vs duct	-0.0805706	0.739524	0.989227	NS or Estimate < 0.5
EXOC1	lobule vs duct	0.126474	0.558658	0.972277	NS or Estimate < 0.5
MINK1	lobule vs duct	0.136581	0.551317	0.970778	NS or Estimate < 0.5
TRIM17	lobule vs duct	-0.453377	0.0463041	0.808632	NS or Estimate < 0.5
YIPF5	lobule vs duct	-0.24253	0.311018	0.943913	NS or Estimate < 0.5
FNBP1L	lobule vs duct	0.0298051	0.882543	0.996428	NS or Estimate < 0.5
SC5D	lobule vs duct	-0.212885	0.53443	0.966555	NS or Estimate < 0.5
RPS14	lobule vs duct	-0.282	0.0589824	0.809858	NS or Estimate < 0.5
AFF3	lobule vs duct	0.318444	0.187621	0.918008	NS or Estimate < 0.5
CD34	lobule vs duct	-0.0325555	0.906241	0.997475	NS or Estimate < 0.5
CHN1	lobule vs duct	-0.0755959	0.767876	0.991114	NS or Estimate < 0.5
U2AF1	lobule vs duct	-0.336182	0.246877	0.935075	NS or Estimate < 0.5
DUT	lobule vs duct	-0.00994084	0.970377	0.998678	NS or Estimate < 0.5
CXorf65	lobule vs duct	0.396182	0.110399	0.866349	NS or Estimate < 0.5
DPPA5	lobule vs duct	-0.059109	0.80453	0.99311	NS or Estimate < 0.5
RAB12	lobule vs duct	-0.112968	0.709994	0.987325	NS or Estimate < 0.5
AARD	lobule vs duct	0.195466	0.472675	0.96068	NS or Estimate < 0.5
VEGFA	lobule vs duct	0.100269	0.661454	0.985424	NS or Estimate < 0.5
SPAG16	lobule vs duct	0.0778101	0.681435	0.986766	NS or Estimate < 0.5
RPS24	lobule vs duct	-0.483769	0.02943	0.792131	NS or Estimate < 0.5
RPS25	lobule vs duct	-0.0211758	0.910014	0.997475	NS or Estimate < 0.5
RPS26	lobule vs duct	-0.244344	0.287032	0.939992	NS or Estimate < 0.5
CCM2	lobule vs duct	-0.0257449	0.916009	0.997475	NS or Estimate < 0.5
TCAIM	lobule vs duct	-0.17772	0.433396	0.956132	NS or Estimate < 0.5
KCTD21	lobule vs duct	-0.109572	0.655885	0.984358	NS or Estimate < 0.5
KIAA1755	lobule vs duct	0.060523	0.793367	0.99195	NS or Estimate < 0.5
RGS7BP	lobule vs duct	0.289238	0.309891	0.943913	NS or Estimate < 0.5
SFMBT2	lobule vs duct	-0.0625383	0.805429	0.993139	NS or Estimate < 0.5
CPTP	lobule vs duct	-0.0214077	0.909092	0.997475	NS or Estimate < 0.5
ZNF16	lobule vs duct	-0.303132	0.252687	0.935075	NS or Estimate < 0.5
METTL17	lobule vs duct	-0.0472382	0.878346	0.995971	NS or Estimate < 0.5
RPS27	lobule vs duct	-0.44729	0.00602325	0.663046	NS or Estimate < 0.5
AP2B1	lobule vs duct	-0.0180859	0.947178	0.997475	NS or Estimate < 0.5
AP1G1	lobule vs duct	-0.236225	0.415848	0.955629	NS or Estimate < 0.5
ARHGAP5	lobule vs duct	0.389761	0.0880328	0.861395	NS or Estimate < 0.5
PLPP4	lobule vs duct	-0.261206	0.264971	0.935075	NS or Estimate < 0.5
SAMD5	lobule vs duct	0.0132451	0.956928	0.997475	NS or Estimate < 0.5
RPS28	lobule vs duct	-0.499546	0.0117291	0.715241	NS or Estimate < 0.5
SPDYE2	lobule vs duct	-0.332634	0.240123	0.935075	NS or Estimate < 0.5
ZNF816	lobule vs duct	-0.12247	0.624505	0.979657	NS or Estimate < 0.5
CYB5RL	lobule vs duct	-0.0925696	0.698097	0.987113	NS or Estimate < 0.5
IFIT3	lobule vs duct	0.124811	0.589932	0.974129	NS or Estimate < 0.5
SRSF7	lobule vs duct	0.225221	0.374624	0.949967	NS or Estimate < 0.5
TP53BP2	lobule vs duct	0.703863	0.00341958	0.60835	P < 0.05
PLAA	lobule vs duct	0.0961501	0.750551	0.989599	NS or Estimate < 0.5
SCMH1	lobule vs duct	-0.212023	0.471519	0.96068	NS or Estimate < 0.5
PLD3	lobule vs duct	-0.205915	0.453827	0.958278	NS or Estimate < 0.5
GASK1B	lobule vs duct	-0.0293768	0.902179	0.997475	NS or Estimate < 0.5
CT55	lobule vs duct	0.207565	0.396786	0.952751	NS or Estimate < 0.5
RNLS	lobule vs duct	-0.284862	0.248774	0.935075	NS or Estimate < 0.5
ERGIC1	lobule vs duct	-0.242799	0.319627	0.944973	NS or Estimate < 0.5
TRMT11	lobule vs duct	-0.250058	0.323387	0.944973	NS or Estimate < 0.5
MCUR1	lobule vs duct	0.120954	0.632466	0.980053	NS or Estimate < 0.5
DHRS12	lobule vs duct	0.128493	0.590984	0.974353	NS or Estimate < 0.5
DNAJB14	lobule vs duct	-0.294909	0.263773	0.935075	NS or Estimate < 0.5
DDX59	lobule vs duct	-0.0662887	0.79768	0.992165	NS or Estimate < 0.5
CFAP206	lobule vs duct	0.374845	0.19949	0.918958	NS or Estimate < 0.5
ALDH3A2	lobule vs duct	-0.0802737	0.766804	0.991114	NS or Estimate < 0.5
CSNK1G3	lobule vs duct	-0.127592	0.587891	0.974129	NS or Estimate < 0.5
RPS29	lobule vs duct	-0.196924	0.0806145	0.850885	NS or Estimate < 0.5
RCE1	lobule vs duct	-0.0536277	0.836843	0.994078	NS or Estimate < 0.5
TMPO	lobule vs duct	0.269197	0.234017	0.935075	NS or Estimate < 0.5
PSRC1	lobule vs duct	-0.245943	0.356317	0.949967	NS or Estimate < 0.5
STK24	lobule vs duct	0.133185	0.541377	0.96924	NS or Estimate < 0.5
SPINT1	lobule vs duct	0.0121369	0.960113	0.997475	NS or Estimate < 0.5
LCMT1	lobule vs duct	0.222131	0.303125	0.941452	NS or Estimate < 0.5
HNRNPH2	lobule vs duct	-0.158166	0.529786	0.965823	NS or Estimate < 0.5
OAS1	lobule vs duct	-0.33519	0.165541	0.90721	NS or Estimate < 0.5
USP16	lobule vs duct	-0.261999	0.250854	0.935075	NS or Estimate < 0.5
RRM1	lobule vs duct	-0.1281	0.600022	0.978389	NS or Estimate < 0.5
FBXO7	lobule vs duct	0.013609	0.952381	0.997475	NS or Estimate < 0.5
EXTL2	lobule vs duct	0.114429	0.704577	0.987325	NS or Estimate < 0.5
GLUL	lobule vs duct	0.281092	0.226451	0.929662	NS or Estimate < 0.5
NGRN	lobule vs duct	0.392525	0.0743854	0.842887	NS or Estimate < 0.5
SRGAP3	lobule vs duct	-0.19815	0.413233	0.955629	NS or Estimate < 0.5
SAR1B	lobule vs duct	-0.328943	0.246782	0.935075	NS or Estimate < 0.5
TMEM98	lobule vs duct	-0.148649	0.559395	0.972277	NS or Estimate < 0.5
CSTF3	lobule vs duct	0.244267	0.323258	0.944973	NS or Estimate < 0.5
CSTF1	lobule vs duct	-0.456784	0.0328763	0.792131	NS or Estimate < 0.5
PPM1B	lobule vs duct	-0.112529	0.676665	0.986275	NS or Estimate < 0.5
DNAAF4	lobule vs duct	0.242362	0.357068	0.949967	NS or Estimate < 0.5
PHF12	lobule vs duct	0.0701701	0.752765	0.989599	NS or Estimate < 0.5
AMZ2	lobule vs duct	-0.0542756	0.814564	0.994008	NS or Estimate < 0.5
RARA	lobule vs duct	0.116692	0.601513	0.978389	NS or Estimate < 0.5
TRPT1	lobule vs duct	0.0757615	0.762296	0.990946	NS or Estimate < 0.5
ZNF404	lobule vs duct	-0.0445608	0.859291	0.994375	NS or Estimate < 0.5
DCLRE1C	lobule vs duct	-0.50203	0.0297734	0.792131	P < 0.05
TRAF5	lobule vs duct	-0.0535325	0.847611	0.994375	NS or Estimate < 0.5
DMAP1	lobule vs duct	0.0611998	0.808999	0.993639	NS or Estimate < 0.5
ERP29	lobule vs duct	-0.213947	0.400718	0.953648	NS or Estimate < 0.5
EXOSC9	lobule vs duct	0.0333989	0.892817	0.996984	NS or Estimate < 0.5
NHP2	lobule vs duct	0.0847681	0.690095	0.986766	NS or Estimate < 0.5
KCNIP1	lobule vs duct	0.0707742	0.744935	0.989227	NS or Estimate < 0.5
ITPRIPL2	lobule vs duct	-0.0396933	0.880799	0.996428	NS or Estimate < 0.5
KCNIP3	lobule vs duct	-0.278375	0.273285	0.938041	NS or Estimate < 0.5
SORBS1	lobule vs duct	-0.0474464	0.834733	0.994078	NS or Estimate < 0.5
C18orf32	lobule vs duct	-0.0337879	0.87113	0.995651	NS or Estimate < 0.5
RGL3	lobule vs duct	0.160377	0.502617	0.962968	NS or Estimate < 0.5
UFD1	lobule vs duct	-0.232025	0.390065	0.952614	NS or Estimate < 0.5
FAM102A	lobule vs duct	0.316366	0.140033	0.879593	NS or Estimate < 0.5
RPL38	lobule vs duct	-0.279195	0.0775152	0.846966	NS or Estimate < 0.5
RYR3	lobule vs duct	0.131751	0.631924	0.980053	NS or Estimate < 0.5
EXOC4	lobule vs duct	0.0233444	0.922866	0.997475	NS or Estimate < 0.5
CYS1	lobule vs duct	-0.152342	0.590974	0.974353	NS or Estimate < 0.5
FAM220A	lobule vs duct	0.19065	0.486761	0.96068	NS or Estimate < 0.5
ARL4A	lobule vs duct	0.27066	0.288803	0.941134	NS or Estimate < 0.5
FOXK1	lobule vs duct	-0.388245	0.151973	0.891664	NS or Estimate < 0.5
ARL5A	lobule vs duct	0.141915	0.527779	0.965823	NS or Estimate < 0.5
ZNF829	lobule vs duct	0.0768771	0.783768	0.991441	NS or Estimate < 0.5
GGPS1	lobule vs duct	0.0743977	0.751509	0.989599	NS or Estimate < 0.5
EIF3B	lobule vs duct	-0.041639	0.864963	0.994603	NS or Estimate < 0.5
CMTM5	lobule vs duct	0.214249	0.417105	0.955629	NS or Estimate < 0.5
TRIM16L	lobule vs duct	0.0282037	0.90589	0.997475	NS or Estimate < 0.5
PDE4B	lobule vs duct	0.208506	0.351269	0.949841	NS or Estimate < 0.5
CDKL5	lobule vs duct	-0.136731	0.678227	0.986766	NS or Estimate < 0.5
AGPAT3	lobule vs duct	-0.183132	0.418313	0.955629	NS or Estimate < 0.5
SIL1	lobule vs duct	0.115089	0.674151	0.986018	NS or Estimate < 0.5
BTF3	lobule vs duct	0.0332905	0.841301	0.994078	NS or Estimate < 0.5
PARL	lobule vs duct	-0.265945	0.327721	0.944973	NS or Estimate < 0.5
EEF1B2	lobule vs duct	-0.06908	0.729546	0.989	NS or Estimate < 0.5
DEFB116	lobule vs duct	0.103513	0.704123	0.987325	NS or Estimate < 0.5
DEFB128	lobule vs duct	-0.296439	0.265121	0.935075	NS or Estimate < 0.5
ZNF284	lobule vs duct	0.0741223	0.766541	0.991114	NS or Estimate < 0.5
SLC38A10	lobule vs duct	0.267504	0.351504	0.949841	NS or Estimate < 0.5
SCNN1A	lobule vs duct	-0.226902	0.429184	0.956009	NS or Estimate < 0.5
MARVELD2	lobule vs duct	0.335649	0.196585	0.918958	NS or Estimate < 0.5
GOLGA6A	lobule vs duct	-0.0490328	0.806619	0.993454	NS or Estimate < 0.5
CDC42SE2	lobule vs duct	-0.0949556	0.717375	0.988328	NS or Estimate < 0.5
CDC42SE1	lobule vs duct	-0.214731	0.406332	0.953648	NS or Estimate < 0.5
PRPS2	lobule vs duct	0.0878037	0.751323	0.989599	NS or Estimate < 0.5
ZNF718	lobule vs duct	0.345793	0.20236	0.918958	NS or Estimate < 0.5
RGS21	lobule vs duct	-0.234475	0.389236	0.952614	NS or Estimate < 0.5
MRGPRE	lobule vs duct	0.0209254	0.931267	0.997475	NS or Estimate < 0.5
BOLA2B	lobule vs duct	0.0966796	0.689851	0.986766	NS or Estimate < 0.5
ALG13	lobule vs duct	-0.427062	0.0738764	0.842076	NS or Estimate < 0.5
ATAD3C	lobule vs duct	0.162112	0.543971	0.970404	NS or Estimate < 0.5
CEACAM16	lobule vs duct	-0.549593	0.0321347	0.792131	P < 0.05
SLC25A29	lobule vs duct	0.259224	0.185467	0.918008	NS or Estimate < 0.5
ZBTB7C	lobule vs duct	0.46851	0.0631475	0.824341	NS or Estimate < 0.5
ATP6V1E1	lobule vs duct	0.181541	0.42993	0.956009	NS or Estimate < 0.5
SPATA6L	lobule vs duct	0.183799	0.376707	0.949967	NS or Estimate < 0.5
SRSF5	lobule vs duct	0.00625671	0.97367	0.998973	NS or Estimate < 0.5
THEMIS2	lobule vs duct	-0.295552	0.264437	0.935075	NS or Estimate < 0.5
AREL1	lobule vs duct	-0.117098	0.459669	0.960004	NS or Estimate < 0.5
ETNK1	lobule vs duct	-0.291079	0.2856	0.938041	NS or Estimate < 0.5
FHL2	lobule vs duct	0.0447679	0.856202	0.994375	NS or Estimate < 0.5
PRSS53	lobule vs duct	-0.509692	0.0830955	0.857052	NS or Estimate < 0.5
GK5	lobule vs duct	0.0619466	0.815879	0.994078	NS or Estimate < 0.5
SEC14L1	lobule vs duct	-0.327954	0.217564	0.926916	NS or Estimate < 0.5
CCNL2	lobule vs duct	0.019824	0.920571	0.997475	NS or Estimate < 0.5
MAP9	lobule vs duct	-0.0273054	0.906193	0.997475	NS or Estimate < 0.5
USP9X	lobule vs duct	0.141912	0.523583	0.965823	NS or Estimate < 0.5
SPAG8	lobule vs duct	0.111977	0.674431	0.986018	NS or Estimate < 0.5
IAH1	lobule vs duct	0.18014	0.479191	0.96068	NS or Estimate < 0.5
ZMYM5	lobule vs duct	-0.0510943	0.830556	0.994078	NS or Estimate < 0.5
SAPCD1	lobule vs duct	0.444497	0.0918254	0.86201	NS or Estimate < 0.5
IL18BP	lobule vs duct	0.0136192	0.953357	0.997475	NS or Estimate < 0.5
TYW5	lobule vs duct	0.121094	0.584091	0.974129	NS or Estimate < 0.5
SNAPC3	lobule vs duct	-0.261628	0.214153	0.926916	NS or Estimate < 0.5
ENTR1	lobule vs duct	0.178969	0.483503	0.96068	NS or Estimate < 0.5
DEDD	lobule vs duct	-0.228172	0.327624	0.944973	NS or Estimate < 0.5
ABHD18	lobule vs duct	-0.0262384	0.924077	0.997475	NS or Estimate < 0.5
CCNI2	lobule vs duct	-0.20821	0.367218	0.949967	NS or Estimate < 0.5
CDC42	lobule vs duct	-0.312184	0.175821	0.916296	NS or Estimate < 0.5
CHIC1	lobule vs duct	-0.331609	0.216779	0.926916	NS or Estimate < 0.5
IZUMO4	lobule vs duct	-0.238275	0.328346	0.944973	NS or Estimate < 0.5
GPX4	lobule vs duct	0.1821	0.258216	0.935075	NS or Estimate < 0.5
STRN4	lobule vs duct	0.221874	0.446599	0.957465	NS or Estimate < 0.5
FKRP	lobule vs duct	0.114678	0.540961	0.96924	NS or Estimate < 0.5
ZNF384	lobule vs duct	-0.526165	0.177231	0.916296	NS or Estimate < 0.5
MESP2	lobule vs duct	0.236422	0.346001	0.946537	NS or Estimate < 0.5
MEOX1	lobule vs duct	-0.034068	0.881234	0.996428	NS or Estimate < 0.5
TCERG1	lobule vs duct	-0.314146	0.179607	0.917026	NS or Estimate < 0.5
SWI5	lobule vs duct	-0.22184	0.418158	0.955629	NS or Estimate < 0.5
FAM3C	lobule vs duct	0.0781978	0.640692	0.98205	NS or Estimate < 0.5
ARL16	lobule vs duct	0.0414591	0.858304	0.994375	NS or Estimate < 0.5
C8orf74	lobule vs duct	-0.0113734	0.957154	0.997475	NS or Estimate < 0.5
MAPK3	lobule vs duct	0.238363	0.300265	0.941452	NS or Estimate < 0.5
FAM133B	lobule vs duct	0.149673	0.531039	0.965823	NS or Estimate < 0.5
MUC17	lobule vs duct	0.103641	0.698142	0.987113	NS or Estimate < 0.5
NRF1	lobule vs duct	-0.141724	0.587591	0.974129	NS or Estimate < 0.5
MYH11	lobule vs duct	0.090248	0.757999	0.990161	NS or Estimate < 0.5
ARAP1	lobule vs duct	-0.330184	0.207081	0.923251	NS or Estimate < 0.5
PALM	lobule vs duct	0.113449	0.697155	0.987106	NS or Estimate < 0.5
ACTR3B	lobule vs duct	-0.10943	0.652779	0.984018	NS or Estimate < 0.5
CHTF8	lobule vs duct	0.239156	0.293376	0.941452	NS or Estimate < 0.5
SERPINB7	lobule vs duct	0.137721	0.614224	0.978494	NS or Estimate < 0.5
PEG10	lobule vs duct	0.688451	0.00650344	0.663046	P < 0.05
HTR4	lobule vs duct	0.347158	0.16684	0.910439	NS or Estimate < 0.5
AKR1E2	lobule vs duct	-0.390913	0.0092949	0.69134	NS or Estimate < 0.5
CLDND1	lobule vs duct	0.166801	0.496218	0.962264	NS or Estimate < 0.5
ZNF765	lobule vs duct	0.00328221	0.988354	0.99925	NS or Estimate < 0.5
TYSND1	lobule vs duct	0.0303131	0.904005	0.997475	NS or Estimate < 0.5
PRDM15	lobule vs duct	-0.012309	0.955289	0.997475	NS or Estimate < 0.5
U2AF1L4	lobule vs duct	0.0996703	0.659138	0.985073	NS or Estimate < 0.5
COA3	lobule vs duct	0.134009	0.565142	0.97324	NS or Estimate < 0.5
YARS2	lobule vs duct	-0.495867	0.0451115	0.808632	NS or Estimate < 0.5
MAPK8IP3	lobule vs duct	0.0568386	0.818832	0.994078	NS or Estimate < 0.5
ZBTB8A	lobule vs duct	0.0282494	0.910923	0.997475	NS or Estimate < 0.5
PHF11	lobule vs duct	-0.147298	0.536593	0.967699	NS or Estimate < 0.5
ASB1	lobule vs duct	0.046916	0.862857	0.994392	NS or Estimate < 0.5
RUFY1	lobule vs duct	0.143112	0.532746	0.965823	NS or Estimate < 0.5
SLC26A6	lobule vs duct	0.0623673	0.804222	0.99311	NS or Estimate < 0.5
SIDT2	lobule vs duct	0.431525	0.0606864	0.811523	NS or Estimate < 0.5
RHBDD2	lobule vs duct	0.355496	0.0979027	0.864096	NS or Estimate < 0.5
ERAP1	lobule vs duct	0.0589986	0.7984	0.992165	NS or Estimate < 0.5
NCALD	lobule vs duct	0.322909	0.176165	0.916296	NS or Estimate < 0.5
CRCP	lobule vs duct	-0.105408	0.687633	0.986766	NS or Estimate < 0.5
ACP1	lobule vs duct	-0.244792	0.264625	0.935075	NS or Estimate < 0.5
ZXDC	lobule vs duct	0.324608	0.138549	0.875857	NS or Estimate < 0.5
TTC23	lobule vs duct	-0.374699	0.162346	0.901347	NS or Estimate < 0.5
GAGE1	lobule vs duct	-0.145378	0.570346	0.97403	NS or Estimate < 0.5
INCENP	lobule vs duct	-0.164028	0.507508	0.963381	NS or Estimate < 0.5
UEVLD	lobule vs duct	-0.345169	0.202743	0.918958	NS or Estimate < 0.5
KIAA0895L	lobule vs duct	0.473141	0.0188728	0.739596	NS or Estimate < 0.5
GDAP1	lobule vs duct	0.120868	0.688724	0.986766	NS or Estimate < 0.5
ABCE1	lobule vs duct	-0.263336	0.25893	0.935075	NS or Estimate < 0.5
RALGDS	lobule vs duct	0.458287	0.0363158	0.794493	NS or Estimate < 0.5
RO60	lobule vs duct	0.233763	0.315355	0.944973	NS or Estimate < 0.5
PREPL	lobule vs duct	-0.0405361	0.834575	0.994078	NS or Estimate < 0.5
PPP4R1	lobule vs duct	0.23671	0.40279	0.953648	NS or Estimate < 0.5
ANKZF1	lobule vs duct	0.147237	0.433259	0.956132	NS or Estimate < 0.5
CYLD	lobule vs duct	0.283364	0.221258	0.926916	NS or Estimate < 0.5
ZNF596	lobule vs duct	0.360799	0.131195	0.87139	NS or Estimate < 0.5
RUFY2	lobule vs duct	-0.275809	0.216283	0.926916	NS or Estimate < 0.5
CAST	lobule vs duct	0.174124	0.49478	0.962034	NS or Estimate < 0.5
TGFB1I1	lobule vs duct	0.210847	0.420682	0.955629	NS or Estimate < 0.5
TMEM80	lobule vs duct	-0.0605693	0.797724	0.992165	NS or Estimate < 0.5
SUMF2	lobule vs duct	-0.147574	0.461106	0.960004	NS or Estimate < 0.5
GSDMB	lobule vs duct	0.0383018	0.888211	0.996714	NS or Estimate < 0.5
ACBD5	lobule vs duct	0.283252	0.220562	0.926916	NS or Estimate < 0.5
DEFA1B	lobule vs duct	-0.215523	0.439521	0.957434	NS or Estimate < 0.5
LGALS7B	lobule vs duct	-0.626176	0.015447	0.718044	P < 0.05
C2orf88	lobule vs duct	-0.326666	0.155809	0.893269	NS or Estimate < 0.5
RIOX2	lobule vs duct	0.195377	0.420618	0.955629	NS or Estimate < 0.5
NCBP2	lobule vs duct	-0.0450173	0.802455	0.99311	NS or Estimate < 0.5
EIF4G2	lobule vs duct	0.0197047	0.927762	0.997475	NS or Estimate < 0.5
CHD2	lobule vs duct	-0.203342	0.398411	0.953519	NS or Estimate < 0.5
SNUPN	lobule vs duct	-0.22429	0.385826	0.952375	NS or Estimate < 0.5
ERBB4	lobule vs duct	-0.270155	0.246039	0.935075	NS or Estimate < 0.5
SNX21	lobule vs duct	0.101505	0.614087	0.978494	NS or Estimate < 0.5
NGDN	lobule vs duct	-0.183268	0.435493	0.956132	NS or Estimate < 0.5
SHPRH	lobule vs duct	0.414271	0.0849936	0.858178	NS or Estimate < 0.5
IQCJ	lobule vs duct	-0.226854	0.339042	0.945414	NS or Estimate < 0.5
GTPBP10	lobule vs duct	0.327627	0.208616	0.923856	NS or Estimate < 0.5
NECTIN2	lobule vs duct	-0.0568266	0.866283	0.994603	NS or Estimate < 0.5
SEC24B	lobule vs duct	-0.173256	0.387966	0.952375	NS or Estimate < 0.5
STAG2	lobule vs duct	0.62616	0.0176849	0.739596	P < 0.05
CSKMT	lobule vs duct	-0.44781	0.0803595	0.850885	NS or Estimate < 0.5
ELMSAN1	lobule vs duct	0.206035	0.366609	0.949967	NS or Estimate < 0.5
TPM3	lobule vs duct	-0.135164	0.515371	0.965306	NS or Estimate < 0.5
SLC6A3	lobule vs duct	-0.0300562	0.899487	0.997475	NS or Estimate < 0.5
NUTM2G	lobule vs duct	0.168421	0.486548	0.96068	NS or Estimate < 0.5
SLC12A2	lobule vs duct	0.505014	0.0554113	0.809858	NS or Estimate < 0.5
SRD5A1	lobule vs duct	-0.238856	0.378217	0.949967	NS or Estimate < 0.5
DPH3	lobule vs duct	-0.112403	0.70017	0.987325	NS or Estimate < 0.5
SST	lobule vs duct	-0.296743	0.187791	0.918008	NS or Estimate < 0.5
PHACTR4	lobule vs duct	0.20464	0.383644	0.952375	NS or Estimate < 0.5
CLCC1	lobule vs duct	-0.117198	0.602501	0.978389	NS or Estimate < 0.5
DBNDD2	lobule vs duct	-0.0132675	0.957037	0.997475	NS or Estimate < 0.5
UBL5	lobule vs duct	-0.10178	0.626444	0.979657	NS or Estimate < 0.5
SMIM15	lobule vs duct	-0.149732	0.48246	0.96068	NS or Estimate < 0.5
SSTR4	lobule vs duct	-0.259151	0.159546	0.895959	NS or Estimate < 0.5
SULT1A2	lobule vs duct	-0.323411	0.217367	0.926916	NS or Estimate < 0.5
TBXAS1	lobule vs duct	0.503573	0.0308501	0.792131	P < 0.05
TKT	lobule vs duct	-0.0385683	0.873411	0.995651	NS or Estimate < 0.5
TNFRSF1A	lobule vs duct	-0.149401	0.518134	0.965306	NS or Estimate < 0.5
TNFRSF1B	lobule vs duct	0.166299	0.507998	0.963381	NS or Estimate < 0.5
TOP2B	lobule vs duct	0.234569	0.260494	0.935075	NS or Estimate < 0.5
TUBB2A	lobule vs duct	0.0933092	0.649551	0.983633	NS or Estimate < 0.5
TUBG1	lobule vs duct	-0.284963	0.245774	0.935075	NS or Estimate < 0.5
MZT1	lobule vs duct	0.0786018	0.742827	0.989227	NS or Estimate < 0.5
UGT2B11	lobule vs duct	-0.204274	0.451252	0.9575	NS or Estimate < 0.5
MOCS1	lobule vs duct	-0.0280814	0.898835	0.997475	NS or Estimate < 0.5
UGT2B15	lobule vs duct	-0.209166	0.328258	0.944973	NS or Estimate < 0.5
LYRM9	lobule vs duct	0.46227	0.0463225	0.808632	NS or Estimate < 0.5
ZNF391	lobule vs duct	0.0111356	0.959674	0.997475	NS or Estimate < 0.5
SLC7A6	lobule vs duct	-0.127011	0.610133	0.978494	NS or Estimate < 0.5
QSER1	lobule vs duct	-0.373545	0.134041	0.87348	NS or Estimate < 0.5
METTL9	lobule vs duct	0.00858622	0.97672	0.998973	NS or Estimate < 0.5
CDC14B	lobule vs duct	-0.396535	0.0698891	0.837528	NS or Estimate < 0.5
FSCN2	lobule vs duct	0.266829	0.236895	0.935075	NS or Estimate < 0.5
MYH14	lobule vs duct	-0.323892	0.171119	0.914275	NS or Estimate < 0.5
HS6ST2	lobule vs duct	-0.0623989	0.815171	0.994078	NS or Estimate < 0.5
ZNF436	lobule vs duct	0.413566	0.0923104	0.86201	NS or Estimate < 0.5
ATG9A	lobule vs duct	-0.419872	0.0539097	0.808632	NS or Estimate < 0.5
SPPL2B	lobule vs duct	-0.227239	0.360181	0.949967	NS or Estimate < 0.5
UBXN11	lobule vs duct	0.013446	0.955877	0.997475	NS or Estimate < 0.5
WIPF1	lobule vs duct	-0.559864	0.0186693	0.739596	P < 0.05
ZNF682	lobule vs duct	-0.204946	0.456186	0.959238	NS or Estimate < 0.5
DPH5	lobule vs duct	0.0782633	0.762562	0.990946	NS or Estimate < 0.5
TMEM231	lobule vs duct	-0.161464	0.476834	0.96068	NS or Estimate < 0.5
ZNF586	lobule vs duct	0.325675	0.274904	0.938041	NS or Estimate < 0.5
BCLAF1	lobule vs duct	0.0312067	0.864199	0.994431	NS or Estimate < 0.5
TSEN34	lobule vs duct	-0.184189	0.304584	0.941452	NS or Estimate < 0.5
SLC38A1	lobule vs duct	0.162602	0.51653	0.965306	NS or Estimate < 0.5
KLK5	lobule vs duct	0.485791	0.0516288	0.808632	NS or Estimate < 0.5
NFKB2	lobule vs duct	-0.0696549	0.785018	0.991516	NS or Estimate < 0.5
FAM222B	lobule vs duct	-0.390585	0.0302959	0.792131	NS or Estimate < 0.5
SLC39A7	lobule vs duct	0.167097	0.504258	0.962968	NS or Estimate < 0.5
UBXN2B	lobule vs duct	0.39502	0.110971	0.866349	NS or Estimate < 0.5
VPS37D	lobule vs duct	-0.0955675	0.73469	0.989227	NS or Estimate < 0.5
APH1A	lobule vs duct	-0.0463132	0.831159	0.994078	NS or Estimate < 0.5
TNFAIP8	lobule vs duct	-0.0693191	0.770061	0.991114	NS or Estimate < 0.5
SMCO1	lobule vs duct	0.268574	0.254076	0.935075	NS or Estimate < 0.5
ALG9	lobule vs duct	0.185909	0.488089	0.96068	NS or Estimate < 0.5
MIER1	lobule vs duct	0.152011	0.496024	0.962264	NS or Estimate < 0.5
RGPD2	lobule vs duct	-0.0431691	0.885735	0.996428	NS or Estimate < 0.5
RTL8C	lobule vs duct	0.0999013	0.606707	0.978494	NS or Estimate < 0.5
RTL8A	lobule vs duct	-0.00107832	0.995932	0.99925	NS or Estimate < 0.5
ASAH2B	lobule vs duct	0.159609	0.492638	0.960907	NS or Estimate < 0.5
KTN1	lobule vs duct	0.286631	0.388672	0.952375	NS or Estimate < 0.5
TRAPPC6B	lobule vs duct	0.127484	0.59497	0.975916	NS or Estimate < 0.5
HNRNPUL2	lobule vs duct	0.390032	0.101386	0.865535	NS or Estimate < 0.5
TMTC4	lobule vs duct	0.37602	0.034863	0.792131	NS or Estimate < 0.5
FNDC3A	lobule vs duct	-0.155269	0.369426	0.949967	NS or Estimate < 0.5
KIAA1191	lobule vs duct	0.222378	0.324873	0.944973	NS or Estimate < 0.5
N4BP2L1	lobule vs duct	0.0734451	0.791625	0.99183	NS or Estimate < 0.5
PGA3	lobule vs duct	-0.141209	0.577041	0.974129	NS or Estimate < 0.5
XIRP2	lobule vs duct	0.114759	0.624141	0.979657	NS or Estimate < 0.5
CLRN2	lobule vs duct	-0.158432	0.540235	0.968951	NS or Estimate < 0.5
OCIAD1	lobule vs duct	-0.171042	0.456853	0.959238	NS or Estimate < 0.5
CASZ1	lobule vs duct	0.368415	0.174713	0.916296	NS or Estimate < 0.5
DBI	lobule vs duct	0.163273	0.455997	0.959238	NS or Estimate < 0.5
BCS1L	lobule vs duct	-0.374399	0.132649	0.871487	NS or Estimate < 0.5
CUL4B	lobule vs duct	0.156322	0.475774	0.96068	NS or Estimate < 0.5
VAV3	lobule vs duct	-0.185592	0.44347	0.957465	NS or Estimate < 0.5
RASA4	lobule vs duct	-0.266741	0.209602	0.924922	NS or Estimate < 0.5
PRKD2	lobule vs duct	0.156545	0.530272	0.965823	NS or Estimate < 0.5
OR7E24	lobule vs duct	-0.0320422	0.906966	0.997475	NS or Estimate < 0.5
LDB3	lobule vs duct	-0.183552	0.458564	0.959795	NS or Estimate < 0.5
CT47A10	lobule vs duct	0.184276	0.468329	0.96068	NS or Estimate < 0.5
ECPAS	lobule vs duct	-0.449635	0.0510719	0.808632	NS or Estimate < 0.5
PLIN4	lobule vs duct	0.234341	0.327331	0.944973	NS or Estimate < 0.5
PPM1N	lobule vs duct	-0.0254888	0.920629	0.997475	NS or Estimate < 0.5
ZNF99	lobule vs duct	0.0727693	0.746468	0.989599	NS or Estimate < 0.5
U2SURP	lobule vs duct	-0.196613	0.441925	0.957465	NS or Estimate < 0.5
DLGAP3	lobule vs duct	-0.0722296	0.753909	0.989599	NS or Estimate < 0.5
UNK	lobule vs duct	0.216435	0.339575	0.94548	NS or Estimate < 0.5
KDM6B	lobule vs duct	0.0640235	0.78853	0.99183	NS or Estimate < 0.5
SLC45A4	lobule vs duct	-0.221912	0.374393	0.949967	NS or Estimate < 0.5
FTO	lobule vs duct	0.0358431	0.852196	0.994375	NS or Estimate < 0.5
LMTK3	lobule vs duct	0.284913	0.253254	0.935075	NS or Estimate < 0.5
IGSF5	lobule vs duct	-0.10277	0.648369	0.983132	NS or Estimate < 0.5
SERPINA11	lobule vs duct	0.0966047	0.671474	0.986018	NS or Estimate < 0.5
GPR108	lobule vs duct	-0.275866	0.277428	0.938041	NS or Estimate < 0.5
INTS1	lobule vs duct	-0.068524	0.77572	0.991114	NS or Estimate < 0.5
MYO5B	lobule vs duct	0.111493	0.631137	0.980053	NS or Estimate < 0.5
FBXO46	lobule vs duct	0.0982298	0.669046	0.986018	NS or Estimate < 0.5
PLEKHM3	lobule vs duct	-0.287976	0.237589	0.935075	NS or Estimate < 0.5
TENM3	lobule vs duct	-0.356309	0.161158	0.897554	NS or Estimate < 0.5
ARHGEF28	lobule vs duct	-0.110937	0.644883	0.982595	NS or Estimate < 0.5
MBOAT1	lobule vs duct	0.179452	0.418691	0.955629	NS or Estimate < 0.5
AJM1	lobule vs duct	-0.0129439	0.955256	0.997475	NS or Estimate < 0.5
PABPN1L	lobule vs duct	-0.182539	0.517984	0.965306	NS or Estimate < 0.5
PRSS54	lobule vs duct	-0.0900164	0.694392	0.986879	NS or Estimate < 0.5
ZNF823	lobule vs duct	-0.0407849	0.860318	0.994375	NS or Estimate < 0.5
TNRC18	lobule vs duct	-0.173189	0.564396	0.97324	NS or Estimate < 0.5
RGP1	lobule vs duct	-0.150135	0.539921	0.968856	NS or Estimate < 0.5
MEGF9	lobule vs duct	-0.0603549	0.784948	0.991516	NS or Estimate < 0.5
CCDC159	lobule vs duct	-0.100628	0.637128	0.981798	NS or Estimate < 0.5
TBX18	lobule vs duct	-0.205666	0.496106	0.962264	NS or Estimate < 0.5
TSPAN11	lobule vs duct	0.111055	0.55016	0.970778	NS or Estimate < 0.5
SETD5	lobule vs duct	-0.121653	0.654045	0.984018	NS or Estimate < 0.5
RASSF10	lobule vs duct	0.110377	0.644954	0.982595	NS or Estimate < 0.5
WIPF3	lobule vs duct	0.0530588	0.778963	0.991114	NS or Estimate < 0.5
C4orf51	lobule vs duct	-0.126327	0.606705	0.978494	NS or Estimate < 0.5
UNC119B	lobule vs duct	-0.414412	0.136171	0.874648	NS or Estimate < 0.5
UNC13C	lobule vs duct	0.6056	0.0296564	0.792131	P < 0.05
AKR1B15	lobule vs duct	0.370896	0.0889372	0.86201	NS or Estimate < 0.5
MGA	lobule vs duct	0.0801018	0.717525	0.988328	NS or Estimate < 0.5
ZNF799	lobule vs duct	-0.0705249	0.781673	0.991441	NS or Estimate < 0.5
TMEM120B	lobule vs duct	0.272067	0.304343	0.941452	NS or Estimate < 0.5
DMRTC1B	lobule vs duct	0.129724	0.575878	0.974129	NS or Estimate < 0.5
PXN	lobule vs duct	0.0130502	0.966143	0.998181	NS or Estimate < 0.5
JMJD6	lobule vs duct	0.332434	0.1817	0.918008	NS or Estimate < 0.5
THOC2	lobule vs duct	-0.403799	0.0887176	0.86201	NS or Estimate < 0.5
SPAG11A	lobule vs duct	-0.133549	0.423516	0.956009	NS or Estimate < 0.5
ELN	lobule vs duct	-0.0134572	0.945684	0.997475	NS or Estimate < 0.5
ACD	lobule vs duct	0.272086	0.224748	0.928799	NS or Estimate < 0.5
NKAPD1	lobule vs duct	-0.395616	0.0897947	0.86201	NS or Estimate < 0.5
GPD2	lobule vs duct	0.242912	0.251066	0.935075	NS or Estimate < 0.5
ZNF133	lobule vs duct	0.566026	0.0249047	0.778435	P < 0.05
FAM86B1	lobule vs duct	-0.0446815	0.826991	0.994078	NS or Estimate < 0.5
RABEP1	lobule vs duct	0.0317285	0.91226	0.997475	NS or Estimate < 0.5
NARF	lobule vs duct	0.00132175	0.995853	0.99925	NS or Estimate < 0.5
RB1CC1	lobule vs duct	-0.127968	0.577185	0.974129	NS or Estimate < 0.5
STRN3	lobule vs duct	-0.20953	0.323184	0.944973	NS or Estimate < 0.5
GP6	lobule vs duct	-0.144736	0.582702	0.974129	NS or Estimate < 0.5
BANK1	lobule vs duct	-0.141067	0.550875	0.970778	NS or Estimate < 0.5
ADGRA1	lobule vs duct	0.0320368	0.900563	0.997475	NS or Estimate < 0.5
WBP1L	lobule vs duct	0.0293808	0.893029	0.996984	NS or Estimate < 0.5
ZNF655	lobule vs duct	-0.63983	0.0077147	0.665798	P < 0.05
TCF4	lobule vs duct	-0.126359	0.66928	0.986018	NS or Estimate < 0.5
PLOD3	lobule vs duct	-0.113241	0.673346	0.986018	NS or Estimate < 0.5
DDTL	lobule vs duct	-0.0334192	0.873754	0.995651	NS or Estimate < 0.5
SERPINA3	lobule vs duct	0.511208	0.0420519	0.80606	P < 0.05
MCC	lobule vs duct	0.216888	0.375302	0.949967	NS or Estimate < 0.5
TMEM213	lobule vs duct	0.132529	0.516552	0.965306	NS or Estimate < 0.5
MYSM1	lobule vs duct	0.212356	0.350795	0.949841	NS or Estimate < 0.5
NDUFAF8	lobule vs duct	-0.146477	0.531833	0.965823	NS or Estimate < 0.5
AAMP	lobule vs duct	0.356697	0.0491095	0.808632	NS or Estimate < 0.5
ABCA3	lobule vs duct	0.187211	0.415463	0.955629	NS or Estimate < 0.5
ABCF1	lobule vs duct	-0.267228	0.218852	0.926916	NS or Estimate < 0.5
ABR	lobule vs duct	0.00163718	0.994311	0.99925	NS or Estimate < 0.5
ACACB	lobule vs duct	-0.303728	0.189549	0.918008	NS or Estimate < 0.5
CCDC102B	lobule vs duct	-0.0736477	0.740429	0.989227	NS or Estimate < 0.5
TRAPPC13	lobule vs duct	0.513375	0.0658101	0.824341	NS or Estimate < 0.5
MCRIP1	lobule vs duct	0.0165123	0.949809	0.997475	NS or Estimate < 0.5
ASIC1	lobule vs duct	0.00709381	0.974531	0.998973	NS or Estimate < 0.5
ACR	lobule vs duct	-0.142019	0.609937	0.978494	NS or Estimate < 0.5
SPRR3	lobule vs duct	0.365156	0.111176	0.866349	NS or Estimate < 0.5
SLC35G2	lobule vs duct	-0.0627257	0.816895	0.994078	NS or Estimate < 0.5
GPR89A	lobule vs duct	-0.367064	0.1772	0.916296	NS or Estimate < 0.5
TMEM184A	lobule vs duct	0.112525	0.641894	0.98205	NS or Estimate < 0.5
ACO2	lobule vs duct	-0.070077	0.772868	0.991114	NS or Estimate < 0.5
GPR18	lobule vs duct	0.0111359	0.96366	0.997861	NS or Estimate < 0.5
HNRNPF	lobule vs duct	0.176008	0.460864	0.960004	NS or Estimate < 0.5
CTNNB1	lobule vs duct	-0.154034	0.401936	0.953648	NS or Estimate < 0.5
HDAC7	lobule vs duct	-0.35401	0.0549422	0.809858	NS or Estimate < 0.5
DLG1	lobule vs duct	-0.511057	0.0510755	0.808632	NS or Estimate < 0.5
SMARCD2	lobule vs duct	-0.153233	0.524655	0.965823	NS or Estimate < 0.5
GRSF1	lobule vs duct	-0.457348	0.0568775	0.809858	NS or Estimate < 0.5
SLC4A4	lobule vs duct	0.0453227	0.82013	0.994078	NS or Estimate < 0.5
ZNF419	lobule vs duct	0.296798	0.200862	0.918958	NS or Estimate < 0.5
CHCHD4	lobule vs duct	-0.226563	0.395494	0.952751	NS or Estimate < 0.5
PTPRJ	lobule vs duct	0.339529	0.155397	0.893269	NS or Estimate < 0.5
RAPGEF3	lobule vs duct	-0.667777	0.0161737	0.735181	P < 0.05
SIGLEC14	lobule vs duct	-0.136783	0.549727	0.970778	NS or Estimate < 0.5
PUS7L	lobule vs duct	0.227033	0.413022	0.955629	NS or Estimate < 0.5
OBSCN	lobule vs duct	-0.181474	0.316882	0.944973	NS or Estimate < 0.5
RBM47	lobule vs duct	0.292429	0.239118	0.935075	NS or Estimate < 0.5
RNF169	lobule vs duct	0.0600204	0.776193	0.991114	NS or Estimate < 0.5
GTF2H2C	lobule vs duct	0.232878	0.334045	0.944973	NS or Estimate < 0.5
BET1L	lobule vs duct	-0.206353	0.43994	0.957434	NS or Estimate < 0.5
CEP78	lobule vs duct	0.00833478	0.974216	0.998973	NS or Estimate < 0.5
C9orf129	lobule vs duct	-0.523273	0.027849	0.792131	P < 0.05
SEPTIN8	lobule vs duct	0.302865	0.210994	0.92603	NS or Estimate < 0.5
TMEM91	lobule vs duct	-0.0145914	0.947239	0.997475	NS or Estimate < 0.5
RAD51AP2	lobule vs duct	-0.212367	0.460524	0.960004	NS or Estimate < 0.5
CCDC43	lobule vs duct	0.211817	0.422944	0.956009	NS or Estimate < 0.5
ZNF506	lobule vs duct	-0.208119	0.390674	0.952614	NS or Estimate < 0.5
ZBTB34	lobule vs duct	0.310424	0.243633	0.935075	NS or Estimate < 0.5
TINF2	lobule vs duct	-0.298096	0.260327	0.935075	NS or Estimate < 0.5
MROH1	lobule vs duct	-0.150387	0.491769	0.960907	NS or Estimate < 0.5
NUTM2A	lobule vs duct	-0.0722281	0.742771	0.989227	NS or Estimate < 0.5
COMMD7	lobule vs duct	-0.206271	0.250849	0.935075	NS or Estimate < 0.5
SGCE	lobule vs duct	0.118592	0.657678	0.984743	NS or Estimate < 0.5
KAT6A	lobule vs duct	0.169012	0.569033	0.973739	NS or Estimate < 0.5
BCAS3	lobule vs duct	0.322093	0.137543	0.874653	NS or Estimate < 0.5
ULK3	lobule vs duct	-0.296627	0.298943	0.941452	NS or Estimate < 0.5
CPPED1	lobule vs duct	-0.110397	0.671253	0.986018	NS or Estimate < 0.5
LRRC58	lobule vs duct	0.116675	0.628656	0.980053	NS or Estimate < 0.5
NXF2	lobule vs duct	0.304381	0.247827	0.935075	NS or Estimate < 0.5
EIF5AL1	lobule vs duct	0.044818	0.835488	0.994078	NS or Estimate < 0.5
ZNF578	lobule vs duct	0.282454	0.155125	0.893269	NS or Estimate < 0.5
RSPH10B2	lobule vs duct	-0.37202	0.101145	0.864914	NS or Estimate < 0.5
FBXL19	lobule vs duct	0.177298	0.367749	0.949967	NS or Estimate < 0.5
ITPR1	lobule vs duct	0.395692	0.0912959	0.86201	NS or Estimate < 0.5
PDS5A	lobule vs duct	0.0674262	0.751284	0.989599	NS or Estimate < 0.5
SENP6	lobule vs duct	-0.227604	0.327832	0.944973	NS or Estimate < 0.5
FAM184A	lobule vs duct	0.288501	0.2422	0.935075	NS or Estimate < 0.5
DROSHA	lobule vs duct	0.34014	0.241434	0.935075	NS or Estimate < 0.5
UBR7	lobule vs duct	-0.0631051	0.804679	0.99311	NS or Estimate < 0.5
REX1BD	lobule vs duct	-0.236224	0.264547	0.935075	NS or Estimate < 0.5
SPATS2L	lobule vs duct	0.311516	0.192936	0.918958	NS or Estimate < 0.5
RAP1GDS1	lobule vs duct	0.0673778	0.775181	0.991114	NS or Estimate < 0.5
VSIG4	lobule vs duct	-0.085887	0.697413	0.987113	NS or Estimate < 0.5
PLEKHB2	lobule vs duct	0.247005	0.316442	0.944973	NS or Estimate < 0.5
CXCL16	lobule vs duct	0.109295	0.649584	0.983633	NS or Estimate < 0.5
TMEM176B	lobule vs duct	0.275018	0.391641	0.952614	NS or Estimate < 0.5
ZNF883	lobule vs duct	-0.155766	0.495308	0.962034	NS or Estimate < 0.5
CCDC160	lobule vs duct	-0.388181	0.138667	0.875857	NS or Estimate < 0.5
IGLON5	lobule vs duct	-0.293347	0.249914	0.935075	NS or Estimate < 0.5
CLDN25	lobule vs duct	-0.0536769	0.865778	0.994603	NS or Estimate < 0.5
CXXC1	lobule vs duct	0.174376	0.422452	0.956009	NS or Estimate < 0.5
NRDC	lobule vs duct	0.0881757	0.728991	0.989	NS or Estimate < 0.5
ACOX3	lobule vs duct	-0.138134	0.61951	0.979657	NS or Estimate < 0.5
ZNF219	lobule vs duct	0.00833444	0.970012	0.998678	NS or Estimate < 0.5
SAMD12	lobule vs duct	-0.0981942	0.691819	0.986766	NS or Estimate < 0.5
FAM13B	lobule vs duct	0.265804	0.248183	0.935075	NS or Estimate < 0.5
ACTN1	lobule vs duct	0.293547	0.162053	0.900584	NS or Estimate < 0.5
DGLUCY	lobule vs duct	-0.0853622	0.722748	0.989	NS or Estimate < 0.5
FOXRED2	lobule vs duct	0.206464	0.384304	0.952375	NS or Estimate < 0.5
TTI2	lobule vs duct	0.160235	0.48341	0.96068	NS or Estimate < 0.5
PCTP	lobule vs duct	0.287463	0.322531	0.944973	NS or Estimate < 0.5
RGS8	lobule vs duct	0.0281383	0.906401	0.997475	NS or Estimate < 0.5
AQP12B	lobule vs duct	0.0543325	0.808877	0.993639	NS or Estimate < 0.5
IFT43	lobule vs duct	-0.232195	0.354369	0.949967	NS or Estimate < 0.5
COL6A6	lobule vs duct	-0.602732	0.0131632	0.715241	P < 0.05
SLC35G6	lobule vs duct	-0.343405	0.21367	0.926916	NS or Estimate < 0.5
ZNF554	lobule vs duct	0.0644886	0.788796	0.99183	NS or Estimate < 0.5
ZNF836	lobule vs duct	-0.261563	0.376574	0.949967	NS or Estimate < 0.5
RRAS2	lobule vs duct	0.0215612	0.933692	0.997475	NS or Estimate < 0.5
GIGYF2	lobule vs duct	0.184757	0.439125	0.957434	NS or Estimate < 0.5
PNMA8A	lobule vs duct	0.00994126	0.968962	0.998649	NS or Estimate < 0.5
AADACL3	lobule vs duct	-0.154544	0.630771	0.980053	NS or Estimate < 0.5
BICDL2	lobule vs duct	-0.0307271	0.880157	0.996428	NS or Estimate < 0.5
CNPY1	lobule vs duct	-0.181108	0.472214	0.96068	NS or Estimate < 0.5
ACVR1	lobule vs duct	-0.0597057	0.798346	0.992165	NS or Estimate < 0.5
FBRS	lobule vs duct	-0.239579	0.0647181	0.824341	NS or Estimate < 0.5
LAMA4	lobule vs duct	-0.205691	0.425257	0.956009	NS or Estimate < 0.5
ASH2L	lobule vs duct	-0.247391	0.251925	0.935075	NS or Estimate < 0.5
CORO1C	lobule vs duct	0.169765	0.435653	0.956132	NS or Estimate < 0.5
ARMC5	lobule vs duct	0.030466	0.901324	0.997475	NS or Estimate < 0.5
ZFYVE16	lobule vs duct	0.144582	0.585161	0.974129	NS or Estimate < 0.5
SWT1	lobule vs duct	0.0301004	0.910423	0.997475	NS or Estimate < 0.5
NUDT19	lobule vs duct	0.092796	0.694096	0.986879	NS or Estimate < 0.5
HMX3	lobule vs duct	0.202666	0.420317	0.955629	NS or Estimate < 0.5
SOWAHD	lobule vs duct	0.19585	0.446993	0.957465	NS or Estimate < 0.5
LRRC30	lobule vs duct	-0.152965	0.65412	0.984018	NS or Estimate < 0.5
TTC24	lobule vs duct	0.00715592	0.983237	0.99925	NS or Estimate < 0.5
ACYP1	lobule vs duct	0.0418717	0.885302	0.996428	NS or Estimate < 0.5
HECTD4	lobule vs duct	-0.162988	0.547135	0.970768	NS or Estimate < 0.5
GSG1L	lobule vs duct	0.616984	0.00765708	0.665798	P < 0.05
ZFP57	lobule vs duct	0.269222	0.331593	0.944973	NS or Estimate < 0.5
SYNPO	lobule vs duct	0.457302	0.0822108	0.856293	NS or Estimate < 0.5
FAM160A1	lobule vs duct	0.0778183	0.772162	0.991114	NS or Estimate < 0.5
ADAM10	lobule vs duct	0.328298	0.181577	0.918008	NS or Estimate < 0.5
PRH2	lobule vs duct	0.29738	0.205354	0.919886	NS or Estimate < 0.5
TMEM87A	lobule vs duct	0.330526	0.208854	0.924139	NS or Estimate < 0.5
SLC35E2B	lobule vs duct	-0.303273	0.26924	0.937322	NS or Estimate < 0.5
MECP2	lobule vs duct	-0.0400427	0.845946	0.99408	NS or Estimate < 0.5
NAA16	lobule vs duct	-0.138139	0.608669	0.978494	NS or Estimate < 0.5
ADAR	lobule vs duct	0.395059	0.0918479	0.86201	NS or Estimate < 0.5
NAV2	lobule vs duct	0.11285	0.628712	0.980053	NS or Estimate < 0.5
NHLH2	lobule vs duct	0.173409	0.406247	0.953648	NS or Estimate < 0.5
ARHGEF25	lobule vs duct	-0.422867	0.0682748	0.835089	NS or Estimate < 0.5
DDX54	lobule vs duct	-0.0706356	0.728516	0.989	NS or Estimate < 0.5
TASOR	lobule vs duct	0.296871	0.118666	0.868129	NS or Estimate < 0.5
TSTD1	lobule vs duct	0.102039	0.646205	0.982694	NS or Estimate < 0.5
TEN1	lobule vs duct	0.253864	0.310905	0.943913	NS or Estimate < 0.5
TBC1D14	lobule vs duct	-0.197649	0.372536	0.949967	NS or Estimate < 0.5
FER1L5	lobule vs duct	0.234349	0.397821	0.953294	NS or Estimate < 0.5
LDB1	lobule vs duct	0.136541	0.470885	0.96068	NS or Estimate < 0.5
ARHGEF7	lobule vs duct	0.244253	0.390541	0.952614	NS or Estimate < 0.5
ZNF276	lobule vs duct	0.0804822	0.760224	0.990791	NS or Estimate < 0.5
LIMA1	lobule vs duct	0.279778	0.216198	0.926916	NS or Estimate < 0.5
RNF180	lobule vs duct	-0.0747221	0.777953	0.991114	NS or Estimate < 0.5
ENTPD6	lobule vs duct	0.263519	0.267177	0.936241	NS or Estimate < 0.5
LSM14A	lobule vs duct	0.0553113	0.80756	0.993608	NS or Estimate < 0.5
C1QC	lobule vs duct	0.143942	0.556658	0.972277	NS or Estimate < 0.5
SLC44A3	lobule vs duct	0.289048	0.201412	0.918958	NS or Estimate < 0.5
TTC22	lobule vs duct	0.00416986	0.989294	0.99925	NS or Estimate < 0.5
CTSC	lobule vs duct	0.0380441	0.882306	0.996428	NS or Estimate < 0.5
AEBP2	lobule vs duct	-0.419489	0.0730554	0.840077	NS or Estimate < 0.5
CLCN7	lobule vs duct	0.0533517	0.810044	0.993639	NS or Estimate < 0.5
TENT2	lobule vs duct	-0.240577	0.322447	0.944973	NS or Estimate < 0.5
DHX36	lobule vs duct	0.0675377	0.782172	0.991441	NS or Estimate < 0.5
SZRD1	lobule vs duct	-0.464075	0.0536695	0.808632	NS or Estimate < 0.5
JMJD7	lobule vs duct	0.154419	0.504849	0.962968	NS or Estimate < 0.5
FANCL	lobule vs duct	-0.233881	0.280547	0.938041	NS or Estimate < 0.5
PRRT4	lobule vs duct	-0.104707	0.6766	0.986275	NS or Estimate < 0.5
TMEM240	lobule vs duct	0.229224	0.332256	0.944973	NS or Estimate < 0.5
ENG	lobule vs duct	-0.350961	0.156158	0.893269	NS or Estimate < 0.5
ADCY8	lobule vs duct	-0.14172	0.552448	0.971514	NS or Estimate < 0.5
KANSL3	lobule vs duct	0.832916	0.00255926	0.591306	P < 0.05
WDR26	lobule vs duct	0.0629735	0.794784	0.992165	NS or Estimate < 0.5
ADCY9	lobule vs duct	0.260021	0.335434	0.944973	NS or Estimate < 0.5
ADCYAP1	lobule vs duct	0.026463	0.914387	0.997475	NS or Estimate < 0.5
ADD1	lobule vs duct	-0.142915	0.553924	0.971684	NS or Estimate < 0.5
ADD3	lobule vs duct	-0.0489074	0.843963	0.994078	NS or Estimate < 0.5
PLIN2	lobule vs duct	0.399464	0.0500301	0.808632	NS or Estimate < 0.5
ABCD3	lobule vs duct	0.307544	0.21099	0.92603	NS or Estimate < 0.5
TENM2	lobule vs duct	-0.10196	0.688058	0.986766	NS or Estimate < 0.5
PRR32	lobule vs duct	0.0580115	0.799782	0.992712	NS or Estimate < 0.5
ZBTB37	lobule vs duct	0.0616439	0.792079	0.99183	NS or Estimate < 0.5
SLC50A1	lobule vs duct	-0.324906	0.134853	0.874513	NS or Estimate < 0.5
NAPEPLD	lobule vs duct	-0.300651	0.198581	0.918958	NS or Estimate < 0.5
GGT6	lobule vs duct	0.214039	0.484331	0.96068	NS or Estimate < 0.5
C1orf194	lobule vs duct	-0.176799	0.484	0.96068	NS or Estimate < 0.5
RPTN	lobule vs duct	-0.0614223	0.811713	0.993639	NS or Estimate < 0.5
ADK	lobule vs duct	0.312265	0.238659	0.935075	NS or Estimate < 0.5
ARIH2OS	lobule vs duct	0.396336	0.119702	0.868129	NS or Estimate < 0.5
CCR2	lobule vs duct	0.202479	0.374488	0.949967	NS or Estimate < 0.5
ZBTB1	lobule vs duct	0.0279444	0.899477	0.997475	NS or Estimate < 0.5
PARK7	lobule vs duct	-0.0492524	0.784766	0.991516	NS or Estimate < 0.5
ADSL	lobule vs duct	0.208261	0.304201	0.941452	NS or Estimate < 0.5
KRTAP2-1	lobule vs duct	0.213179	0.413276	0.955629	NS or Estimate < 0.5
ADM	lobule vs duct	-0.292753	0.24882	0.935075	NS or Estimate < 0.5
PABPC1L	lobule vs duct	-0.163061	0.527512	0.965823	NS or Estimate < 0.5
CASK	lobule vs duct	0.00513429	0.983752	0.99925	NS or Estimate < 0.5
SLC12A3	lobule vs duct	0.204028	0.388857	0.952375	NS or Estimate < 0.5
SLC25A19	lobule vs duct	0.257027	0.27253	0.938041	NS or Estimate < 0.5
THTPA	lobule vs duct	0.0938064	0.693384	0.986839	NS or Estimate < 0.5
PIGG	lobule vs duct	-0.0499283	0.809056	0.993639	NS or Estimate < 0.5
MYO7A	lobule vs duct	0.0698744	0.819267	0.994078	NS or Estimate < 0.5
CENPL	lobule vs duct	-0.192857	0.389557	0.952614	NS or Estimate < 0.5
CFLAR	lobule vs duct	0.492435	0.0667584	0.829032	NS or Estimate < 0.5
PCID2	lobule vs duct	0.0923067	0.686151	0.986766	NS or Estimate < 0.5
HMOX2	lobule vs duct	-0.67919	0.0166512	0.739596	P < 0.05
TET2	lobule vs duct	-0.219559	0.237805	0.935075	NS or Estimate < 0.5
AURKAIP1	lobule vs duct	0.174699	0.450969	0.9575	NS or Estimate < 0.5
GPBP1	lobule vs duct	-0.128284	0.586692	0.974129	NS or Estimate < 0.5
UBAP2L	lobule vs duct	0.0137856	0.968623	0.998649	NS or Estimate < 0.5
MAD2L2	lobule vs duct	-0.119044	0.636618	0.981798	NS or Estimate < 0.5
CDCA7L	lobule vs duct	-0.00916009	0.962668	0.997652	NS or Estimate < 0.5
MYRF	lobule vs duct	-0.377944	0.183057	0.918008	NS or Estimate < 0.5
STXBP2	lobule vs duct	0.337427	0.188392	0.918008	NS or Estimate < 0.5
YPEL5	lobule vs duct	-0.112895	0.66499	0.985989	NS or Estimate < 0.5
CRY2	lobule vs duct	-0.26805	0.244371	0.935075	NS or Estimate < 0.5
ZNF469	lobule vs duct	0.364375	0.122645	0.868129	NS or Estimate < 0.5
ANK2	lobule vs duct	-0.268295	0.358858	0.949967	NS or Estimate < 0.5
ING4	lobule vs duct	-0.174651	0.466339	0.96068	NS or Estimate < 0.5
KCNE1	lobule vs duct	-0.00305331	0.988082	0.99925	NS or Estimate < 0.5
BEX4	lobule vs duct	-0.111347	0.674187	0.986018	NS or Estimate < 0.5
CTSA	lobule vs duct	-0.0874641	0.752476	0.989599	NS or Estimate < 0.5
ETFA	lobule vs duct	-0.483487	0.0454321	0.808632	NS or Estimate < 0.5
CEACAM19	lobule vs duct	0.150149	0.600122	0.978389	NS or Estimate < 0.5
KRTAP20-3	lobule vs duct	0.26405	0.192318	0.918958	NS or Estimate < 0.5
AP4S1	lobule vs duct	0.313376	0.177434	0.916296	NS or Estimate < 0.5
ZEB1	lobule vs duct	0.0343002	0.878251	0.995971	NS or Estimate < 0.5
ATXN7	lobule vs duct	0.125972	0.59346	0.975916	NS or Estimate < 0.5
UBP1	lobule vs duct	0.511361	0.0230666	0.773013	P < 0.05
PAK3	lobule vs duct	-0.286561	0.247514	0.935075	NS or Estimate < 0.5
UGT8	lobule vs duct	0.0983708	0.728752	0.989	NS or Estimate < 0.5
SULF1	lobule vs duct	-0.300912	0.0964365	0.864096	NS or Estimate < 0.5
SPRED2	lobule vs duct	0.076699	0.801096	0.99311	NS or Estimate < 0.5
WDSUB1	lobule vs duct	0.192744	0.437796	0.956332	NS or Estimate < 0.5
VGLL4	lobule vs duct	0.111718	0.629415	0.980053	NS or Estimate < 0.5
SLC39A13	lobule vs duct	-0.102605	0.673775	0.986018	NS or Estimate < 0.5
DIS3	lobule vs duct	-0.073659	0.781905	0.991441	NS or Estimate < 0.5
TPRN	lobule vs duct	-0.101909	0.660424	0.985361	NS or Estimate < 0.5
LYRM1	lobule vs duct	0.522056	0.0343247	0.792131	P < 0.05
LACC1	lobule vs duct	-0.121422	0.631403	0.980053	NS or Estimate < 0.5
TSPAN14	lobule vs duct	0.172128	0.486023	0.96068	NS or Estimate < 0.5
MPV17L	lobule vs duct	-0.0622724	0.779409	0.991176	NS or Estimate < 0.5
AP1AR	lobule vs duct	0.248466	0.267408	0.936241	NS or Estimate < 0.5
MAPKBP1	lobule vs duct	-0.136097	0.380692	0.951498	NS or Estimate < 0.5
USP8	lobule vs duct	-0.173644	0.41965	0.955629	NS or Estimate < 0.5
NUDT22	lobule vs duct	-0.306054	0.19368	0.918958	NS or Estimate < 0.5
ARHGEF3	lobule vs duct	0.369131	0.0961815	0.864096	NS or Estimate < 0.5
REPS1	lobule vs duct	-0.0133555	0.962891	0.997652	NS or Estimate < 0.5
SPIRE1	lobule vs duct	-0.0305961	0.898944	0.997475	NS or Estimate < 0.5
NCS1	lobule vs duct	0.268556	0.433196	0.956132	NS or Estimate < 0.5
TOMM40	lobule vs duct	0.192198	0.4796	0.96068	NS or Estimate < 0.5
ENTPD4	lobule vs duct	-0.565054	0.0141743	0.718044	P < 0.05
NAF1	lobule vs duct	0.0705515	0.820977	0.994078	NS or Estimate < 0.5
SYNPO2	lobule vs duct	0.493617	0.0515799	0.808632	NS or Estimate < 0.5
AEBP1	lobule vs duct	-0.191924	0.490923	0.960907	NS or Estimate < 0.5
NSDHL	lobule vs duct	0.0188054	0.944211	0.997475	NS or Estimate < 0.5
INSYN2B	lobule vs duct	0.0351479	0.893752	0.997049	NS or Estimate < 0.5
SYTL4	lobule vs duct	-0.137837	0.584943	0.974129	NS or Estimate < 0.5
KRBOX4	lobule vs duct	0.210316	0.385894	0.952375	NS or Estimate < 0.5
GASK1A	lobule vs duct	-0.369035	0.130003	0.87139	NS or Estimate < 0.5
CLEC12B	lobule vs duct	0.213344	0.296341	0.941452	NS or Estimate < 0.5
SLC9A3R2	lobule vs duct	0.164584	0.471401	0.96068	NS or Estimate < 0.5
ANKRD33	lobule vs duct	0.390741	0.114477	0.866349	NS or Estimate < 0.5
ATP6V0A1	lobule vs duct	-0.095773	0.62403	0.979657	NS or Estimate < 0.5
ZNF562	lobule vs duct	-0.183338	0.488624	0.96068	NS or Estimate < 0.5
SHC1	lobule vs duct	0.295533	0.16833	0.912497	NS or Estimate < 0.5
DOCK9	lobule vs duct	-0.0992824	0.699123	0.987325	NS or Estimate < 0.5
ATF7	lobule vs duct	0.221696	0.417315	0.955629	NS or Estimate < 0.5
PLD1	lobule vs duct	0.404618	0.0715105	0.839063	NS or Estimate < 0.5
PLXNB1	lobule vs duct	-0.395033	0.095967	0.864096	NS or Estimate < 0.5
ABHD17A	lobule vs duct	-0.245111	0.272669	0.938041	NS or Estimate < 0.5
ERAP2	lobule vs duct	0.229236	0.370098	0.949967	NS or Estimate < 0.5
LTBP3	lobule vs duct	-0.18696	0.44466	0.957465	NS or Estimate < 0.5
YAP1	lobule vs duct	0.144457	0.483984	0.96068	NS or Estimate < 0.5
MYO1B	lobule vs duct	-0.060002	0.77716	0.991114	NS or Estimate < 0.5
DNAJA4	lobule vs duct	0.256917	0.379858	0.951399	NS or Estimate < 0.5
ACAA1	lobule vs duct	-0.0980303	0.705398	0.987325	NS or Estimate < 0.5
SMARCC2	lobule vs duct	0.220211	0.337035	0.944973	NS or Estimate < 0.5
C15orf62	lobule vs duct	0.00320894	0.990484	0.99925	NS or Estimate < 0.5
THAP5	lobule vs duct	0.39817	0.0817644	0.8547	NS or Estimate < 0.5
ERICH4	lobule vs duct	0.144722	0.513206	0.965237	NS or Estimate < 0.5
AP1M1	lobule vs duct	-0.0584205	0.823385	0.994078	NS or Estimate < 0.5
SPAG9	lobule vs duct	0.0105004	0.96216	0.997616	NS or Estimate < 0.5
EIF4E	lobule vs duct	-0.19417	0.380692	0.951498	NS or Estimate < 0.5
GUCY1A1	lobule vs duct	-0.175939	0.444347	0.957465	NS or Estimate < 0.5
HMGB2	lobule vs duct	0.136423	0.576295	0.974129	NS or Estimate < 0.5
RUFY3	lobule vs duct	0.1905	0.401415	0.953648	NS or Estimate < 0.5
AHCYL2	lobule vs duct	0.211766	0.373184	0.949967	NS or Estimate < 0.5
IFT22	lobule vs duct	0.498317	0.0580242	0.809858	NS or Estimate < 0.5
RTCA	lobule vs duct	0.111555	0.657524	0.984743	NS or Estimate < 0.5
PITPNM1	lobule vs duct	0.462761	0.17377	0.916296	NS or Estimate < 0.5
CAB39	lobule vs duct	0.192577	0.370897	0.949967	NS or Estimate < 0.5
CBLC	lobule vs duct	-0.254815	0.443771	0.957465	NS or Estimate < 0.5
PPIP5K1	lobule vs duct	-0.255987	0.318086	0.944973	NS or Estimate < 0.5
CLDN5	lobule vs duct	-0.250681	0.262686	0.935075	NS or Estimate < 0.5
PWWP2A	lobule vs duct	0.236905	0.348126	0.948594	NS or Estimate < 0.5
DMRT2	lobule vs duct	0.36727	0.0387468	0.798366	NS or Estimate < 0.5
SUGT1	lobule vs duct	-0.136495	0.608833	0.978494	NS or Estimate < 0.5
RABL2B	lobule vs duct	0.0244608	0.916945	0.997475	NS or Estimate < 0.5
NEMP1	lobule vs duct	-0.268281	0.285574	0.938041	NS or Estimate < 0.5
SUN1	lobule vs duct	0.137868	0.550917	0.970778	NS or Estimate < 0.5
ZNF385A	lobule vs duct	0.480927	0.0541623	0.808632	NS or Estimate < 0.5
NSMF	lobule vs duct	0.296753	0.254073	0.935075	NS or Estimate < 0.5
CRISP1	lobule vs duct	-0.114982	0.647167	0.982705	NS or Estimate < 0.5
TMEM131L	lobule vs duct	-0.178757	0.546278	0.970768	NS or Estimate < 0.5
SATB1	lobule vs duct	0.0950812	0.694683	0.986879	NS or Estimate < 0.5
PEX5	lobule vs duct	0.222802	0.416586	0.955629	NS or Estimate < 0.5
AP3M2	lobule vs duct	-0.0171128	0.943641	0.997475	NS or Estimate < 0.5
PRR22	lobule vs duct	-0.0711587	0.780409	0.991176	NS or Estimate < 0.5
STRIP2	lobule vs duct	0.336084	0.18833	0.918008	NS or Estimate < 0.5
PSMG3	lobule vs duct	-0.150301	0.409906	0.955629	NS or Estimate < 0.5
RBM20	lobule vs duct	-0.0430739	0.859019	0.994375	NS or Estimate < 0.5
SLC6A6	lobule vs duct	-0.123723	0.647859	0.983132	NS or Estimate < 0.5
TBC1D5	lobule vs duct	-0.188127	0.409803	0.955629	NS or Estimate < 0.5
ZDHHC4	lobule vs duct	-0.0205025	0.930538	0.997475	NS or Estimate < 0.5
C7orf50	lobule vs duct	0.0688104	0.784497	0.991516	NS or Estimate < 0.5
VAV2	lobule vs duct	-0.0161607	0.950097	0.997475	NS or Estimate < 0.5
CDV3	lobule vs duct	0.420341	0.10677	0.866349	NS or Estimate < 0.5
AZI2	lobule vs duct	0.201883	0.387216	0.952375	NS or Estimate < 0.5
IQCG	lobule vs duct	0.352497	0.132811	0.871487	NS or Estimate < 0.5
LSMEM1	lobule vs duct	0.340067	0.201766	0.918958	NS or Estimate < 0.5
GSE1	lobule vs duct	-0.0461932	0.856625	0.994375	NS or Estimate < 0.5
LRRC8B	lobule vs duct	0.461425	0.145616	0.890408	NS or Estimate < 0.5
LRRC8D	lobule vs duct	0.0995263	0.683373	0.986766	NS or Estimate < 0.5
TOMM6	lobule vs duct	-0.0293152	0.883468	0.996428	NS or Estimate < 0.5
AFAP1	lobule vs duct	-0.0149945	0.955903	0.997475	NS or Estimate < 0.5
ZNF213	lobule vs duct	0.465478	0.0836677	0.857052	NS or Estimate < 0.5
HOGA1	lobule vs duct	0.265355	0.279934	0.938041	NS or Estimate < 0.5
DERL1	lobule vs duct	-0.0781925	0.742432	0.989227	NS or Estimate < 0.5
NFIA	lobule vs duct	-0.329984	0.202176	0.918958	NS or Estimate < 0.5
OST4	lobule vs duct	0.0836423	0.724498	0.989	NS or Estimate < 0.5
SARDH	lobule vs duct	-0.0311338	0.861423	0.994375	NS or Estimate < 0.5
DEK	lobule vs duct	0.0520263	0.801318	0.99311	NS or Estimate < 0.5
ARFRP1	lobule vs duct	-0.166435	0.498728	0.962968	NS or Estimate < 0.5
KLC2	lobule vs duct	0.0848195	0.743128	0.989227	NS or Estimate < 0.5
HYLS1	lobule vs duct	-0.130653	0.610906	0.978494	NS or Estimate < 0.5
AHI1	lobule vs duct	-0.520308	0.0249437	0.778435	P < 0.05
PPP1R18	lobule vs duct	0.38888	0.170633	0.913854	NS or Estimate < 0.5
RTL1	lobule vs duct	-0.112631	0.677467	0.986752	NS or Estimate < 0.5
FERMT2	lobule vs duct	-0.0471491	0.819238	0.994078	NS or Estimate < 0.5
ELMOD3	lobule vs duct	0.290999	0.236504	0.935075	NS or Estimate < 0.5
JDP2	lobule vs duct	-0.0766902	0.768796	0.991114	NS or Estimate < 0.5
DNAJA3	lobule vs duct	-0.503742	0.0219922	0.767776	P < 0.05
CCDC36	lobule vs duct	-0.180329	0.480735	0.96068	NS or Estimate < 0.5
FKBP6	lobule vs duct	0.377955	0.11293	0.866349	NS or Estimate < 0.5
TAF12	lobule vs duct	-0.0819503	0.725644	0.989	NS or Estimate < 0.5
NDRG1	lobule vs duct	0.303782	0.15489	0.893269	NS or Estimate < 0.5
PAX7	lobule vs duct	0.00549748	0.979983	0.99925	NS or Estimate < 0.5
HSF2	lobule vs duct	-0.243351	0.308842	0.943913	NS or Estimate < 0.5
SMIM13	lobule vs duct	0.00590053	0.981187	0.99925	NS or Estimate < 0.5
C5orf24	lobule vs duct	0.100388	0.699509	0.987325	NS or Estimate < 0.5
GDAP2	lobule vs duct	0.191279	0.457264	0.959563	NS or Estimate < 0.5
CLHC1	lobule vs duct	0.210408	0.334124	0.944973	NS or Estimate < 0.5
ARHGAP26	lobule vs duct	-0.424632	0.0877566	0.861395	NS or Estimate < 0.5
PIP5K1A	lobule vs duct	-0.114484	0.678425	0.986766	NS or Estimate < 0.5
INPP5K	lobule vs duct	-0.49611	0.0542891	0.808632	NS or Estimate < 0.5
PTPRK	lobule vs duct	0.268164	0.290917	0.941452	NS or Estimate < 0.5
EIF2AK2	lobule vs duct	0.203968	0.318398	0.944973	NS or Estimate < 0.5
PABPC4	lobule vs duct	0.0271398	0.90273	0.997475	NS or Estimate < 0.5
MSRA	lobule vs duct	-0.60083	0.0155215	0.718044	P < 0.05
ATL2	lobule vs duct	-0.00279748	0.99182	0.99925	NS or Estimate < 0.5
SMIM19	lobule vs duct	-0.0770952	0.727093	0.989	NS or Estimate < 0.5
DERL3	lobule vs duct	-0.371775	0.130269	0.87139	NS or Estimate < 0.5
ECD	lobule vs duct	-0.245039	0.231817	0.935075	NS or Estimate < 0.5
RPN2	lobule vs duct	0.0775528	0.653888	0.984018	NS or Estimate < 0.5
LRP5L	lobule vs duct	0.0781934	0.744525	0.989227	NS or Estimate < 0.5
ZBTB43	lobule vs duct	-0.354021	0.149167	0.891431	NS or Estimate < 0.5
FDPS	lobule vs duct	0.230616	0.416949	0.955629	NS or Estimate < 0.5
RNF185	lobule vs duct	-0.0315091	0.894005	0.997173	NS or Estimate < 0.5
POSTN	lobule vs duct	0.0128514	0.947725	0.997475	NS or Estimate < 0.5
MYOT	lobule vs duct	-0.0791391	0.728937	0.989	NS or Estimate < 0.5
GKAP1	lobule vs duct	-0.452212	0.0724775	0.840077	NS or Estimate < 0.5
TRPC4	lobule vs duct	0.141324	0.570748	0.97403	NS or Estimate < 0.5
NDUFB11	lobule vs duct	-0.0199962	0.930152	0.997475	NS or Estimate < 0.5
ABL2	lobule vs duct	-0.0957351	0.72189	0.989	NS or Estimate < 0.5
C2CD4D	lobule vs duct	-0.336645	0.201703	0.918958	NS or Estimate < 0.5
NFATC4	lobule vs duct	-0.111272	0.692452	0.986766	NS or Estimate < 0.5
PUF60	lobule vs duct	-0.0478255	0.82176	0.994078	NS or Estimate < 0.5
TRMT1	lobule vs duct	0.0379013	0.863987	0.994412	NS or Estimate < 0.5
ZNF692	lobule vs duct	0.00245115	0.992094	0.99925	NS or Estimate < 0.5
LIMS2	lobule vs duct	0.0258188	0.922103	0.997475	NS or Estimate < 0.5
ZNF415	lobule vs duct	0.329365	0.383702	0.952375	NS or Estimate < 0.5
LRIG3	lobule vs duct	0.127	0.584726	0.974129	NS or Estimate < 0.5
COLCA2	lobule vs duct	-0.0723166	0.793138	0.991877	NS or Estimate < 0.5
BEAN1	lobule vs duct	-0.184251	0.457904	0.959728	NS or Estimate < 0.5
R3HCC1	lobule vs duct	-0.173183	0.547785	0.970768	NS or Estimate < 0.5
FBXO28	lobule vs duct	0.0514465	0.841432	0.994078	NS or Estimate < 0.5
SLF2	lobule vs duct	-0.200997	0.346451	0.946793	NS or Estimate < 0.5
ALG1L2	lobule vs duct	0.0187175	0.92938	0.997475	NS or Estimate < 0.5
OTUD5	lobule vs duct	-0.0585729	0.805649	0.993139	NS or Estimate < 0.5
HSBP1L1	lobule vs duct	0.284274	0.228735	0.931396	NS or Estimate < 0.5
LAX1	lobule vs duct	0.0173779	0.937937	0.997475	NS or Estimate < 0.5
FZR1	lobule vs duct	0.0168681	0.950443	0.997475	NS or Estimate < 0.5
GRAMD1A	lobule vs duct	0.0607853	0.768122	0.991114	NS or Estimate < 0.5
BORCS7	lobule vs duct	-0.905306	0.00196018	0.564965	P < 0.05
RCOR3	lobule vs duct	-0.0235	0.87601	0.995862	NS or Estimate < 0.5
ATXN7L3B	lobule vs duct	-0.149444	0.506926	0.963381	NS or Estimate < 0.5
IFFO2	lobule vs duct	-0.119989	0.573175	0.974129	NS or Estimate < 0.5
DAZAP2	lobule vs duct	-0.39969	0.108477	0.866349	NS or Estimate < 0.5
AKIRIN1	lobule vs duct	-0.0624787	0.821525	0.994078	NS or Estimate < 0.5
ANP32E	lobule vs duct	0.0478764	0.851461	0.994375	NS or Estimate < 0.5
C19orf38	lobule vs duct	-0.0288824	0.904659	0.997475	NS or Estimate < 0.5
C1orf198	lobule vs duct	0.432958	0.0852242	0.858178	NS or Estimate < 0.5
BTF3L4	lobule vs duct	0.088222	0.695727	0.987106	NS or Estimate < 0.5
ZNF841	lobule vs duct	-0.0911147	0.690623	0.986766	NS or Estimate < 0.5
ZNF844	lobule vs duct	0.0400025	0.877294	0.995971	NS or Estimate < 0.5
SYT2	lobule vs duct	-0.20922	0.398797	0.953519	NS or Estimate < 0.5
BTBD19	lobule vs duct	0.140708	0.587484	0.974129	NS or Estimate < 0.5
ACAD10	lobule vs duct	-0.370225	0.130854	0.87139	NS or Estimate < 0.5
TLK1	lobule vs duct	-0.155629	0.56381	0.97324	NS or Estimate < 0.5
ZAR1L	lobule vs duct	-0.0958655	0.678566	0.986766	NS or Estimate < 0.5
LRRFIP1	lobule vs duct	0.0926098	0.641307	0.98205	NS or Estimate < 0.5
TMEM151B	lobule vs duct	-0.238539	0.41223	0.955629	NS or Estimate < 0.5
ILF3	lobule vs duct	-0.112356	0.502403	0.962968	NS or Estimate < 0.5
ATXN1L	lobule vs duct	0.126417	0.594545	0.975916	NS or Estimate < 0.5
SVOPL	lobule vs duct	-0.246097	0.21825	0.926916	NS or Estimate < 0.5
BCAP31	lobule vs duct	0.102988	0.693781	0.98686	NS or Estimate < 0.5
CNST	lobule vs duct	-0.0543187	0.846656	0.994375	NS or Estimate < 0.5
ALOX15	lobule vs duct	0.164159	0.535341	0.966993	NS or Estimate < 0.5
ATP13A2	lobule vs duct	-0.00886024	0.971722	0.998973	NS or Estimate < 0.5
TP53BP1	lobule vs duct	0.0467153	0.830451	0.994078	NS or Estimate < 0.5
NIPA1	lobule vs duct	0.242531	0.31883	0.944973	NS or Estimate < 0.5
RNASEH2B	lobule vs duct	0.0593076	0.807367	0.993608	NS or Estimate < 0.5
SEMA4D	lobule vs duct	-0.270938	0.276278	0.938041	NS or Estimate < 0.5
EMC8	lobule vs duct	0.236789	0.446121	0.957465	NS or Estimate < 0.5
MGRN1	lobule vs duct	0.130241	0.595182	0.975916	NS or Estimate < 0.5
ARFGAP3	lobule vs duct	0.00601758	0.975838	0.998973	NS or Estimate < 0.5
SPART	lobule vs duct	-0.303598	0.246	0.935075	NS or Estimate < 0.5
TMEM169	lobule vs duct	0.260767	0.315128	0.944973	NS or Estimate < 0.5
DMTF1	lobule vs duct	-0.28048	0.183642	0.918008	NS or Estimate < 0.5
THOC6	lobule vs duct	-0.111004	0.603943	0.978494	NS or Estimate < 0.5
NEDD9	lobule vs duct	0.102723	0.680413	0.986766	NS or Estimate < 0.5
CTIF	lobule vs duct	-0.435633	0.05145	0.808632	NS or Estimate < 0.5
MORF4L2	lobule vs duct	-0.0935419	0.686255	0.986766	NS or Estimate < 0.5
EDC3	lobule vs duct	-0.75436	0.00114183	0.488608	P < 0.05
HES4	lobule vs duct	0.184901	0.663133	0.985424	NS or Estimate < 0.5
BMERB1	lobule vs duct	-0.28208	0.0967834	0.864096	NS or Estimate < 0.5
INTS12	lobule vs duct	0.0746057	0.781912	0.991441	NS or Estimate < 0.5
NREP	lobule vs duct	-0.142182	0.629419	0.980053	NS or Estimate < 0.5
FLYWCH2	lobule vs duct	0.110726	0.628942	0.980053	NS or Estimate < 0.5
SLC35B3	lobule vs duct	0.362438	0.171241	0.914275	NS or Estimate < 0.5
CPSF7	lobule vs duct	0.000516952	0.998206	0.999764	NS or Estimate < 0.5
BBX	lobule vs duct	0.0187624	0.929516	0.997475	NS or Estimate < 0.5
ZNF780A	lobule vs duct	0.119615	0.676276	0.986275	NS or Estimate < 0.5
NFYC	lobule vs duct	-0.245059	0.298936	0.941452	NS or Estimate < 0.5
ITPK1	lobule vs duct	-0.256681	0.327959	0.944973	NS or Estimate < 0.5
EFTUD2	lobule vs duct	-0.232959	0.26119	0.935075	NS or Estimate < 0.5
TGFBRAP1	lobule vs duct	0.192411	0.365971	0.949967	NS or Estimate < 0.5
PIK3R5	lobule vs duct	0.252195	0.322601	0.944973	NS or Estimate < 0.5
TNRC6C	lobule vs duct	0.0931807	0.708844	0.987325	NS or Estimate < 0.5
HNRNPLL	lobule vs duct	-0.0811708	0.734243	0.989227	NS or Estimate < 0.5
PTGES3L	lobule vs duct	0.364879	0.15423	0.89277	NS or Estimate < 0.5
ATG13	lobule vs duct	-0.0127769	0.961771	0.997515	NS or Estimate < 0.5
CHID1	lobule vs duct	0.0243268	0.916458	0.997475	NS or Estimate < 0.5
ARHGAP32	lobule vs duct	0.215026	0.450319	0.9575	NS or Estimate < 0.5
FAM111B	lobule vs duct	-0.0904506	0.787978	0.99183	NS or Estimate < 0.5
ERI2	lobule vs duct	0.311598	0.172166	0.91575	NS or Estimate < 0.5
HSD3B7	lobule vs duct	0.267353	0.249615	0.935075	NS or Estimate < 0.5
C17orf49	lobule vs duct	-0.0359712	0.875961	0.995862	NS or Estimate < 0.5
SLC6A8	lobule vs duct	-0.130175	0.551557	0.970778	NS or Estimate < 0.5
PIEZO1	lobule vs duct	-0.241885	0.469378	0.96068	NS or Estimate < 0.5
API5	lobule vs duct	-0.0953151	0.717209	0.988295	NS or Estimate < 0.5
AMIGO2	lobule vs duct	0.0430071	0.899727	0.997475	NS or Estimate < 0.5
MPC2	lobule vs duct	-0.133447	0.485595	0.96068	NS or Estimate < 0.5
FAM13C	lobule vs duct	0.06974	0.780357	0.991176	NS or Estimate < 0.5
CTDNEP1	lobule vs duct	-0.166033	0.516162	0.965306	NS or Estimate < 0.5
SLC25A39	lobule vs duct	-0.32352	0.0766897	0.846885	NS or Estimate < 0.5
TPCN1	lobule vs duct	-0.00257322	0.991469	0.99925	NS or Estimate < 0.5
MAPRE2	lobule vs duct	0.0459171	0.828396	0.994078	NS or Estimate < 0.5
HRH4	lobule vs duct	-0.014595	0.958605	0.997475	NS or Estimate < 0.5
CCDC68	lobule vs duct	-0.189309	0.504925	0.962968	NS or Estimate < 0.5
LEUTX	lobule vs duct	0.0392598	0.853683	0.994375	NS or Estimate < 0.5
NOX4	lobule vs duct	0.0661911	0.811366	0.993639	NS or Estimate < 0.5
TCTN2	lobule vs duct	-0.136339	0.655059	0.984358	NS or Estimate < 0.5
TCHP	lobule vs duct	-0.222673	0.427812	0.956009	NS or Estimate < 0.5
RPH3A	lobule vs duct	0.522618	0.0545431	0.809477	NS or Estimate < 0.5
BSDC1	lobule vs duct	0.493821	0.0488207	0.808632	NS or Estimate < 0.5
TMEM30A	lobule vs duct	0.0520535	0.613877	0.978494	NS or Estimate < 0.5
CAPN8	lobule vs duct	0.234941	0.42119	0.956009	NS or Estimate < 0.5
TBC1D7	lobule vs duct	0.129417	0.657034	0.984743	NS or Estimate < 0.5
UBTFL1	lobule vs duct	-0.109865	0.597467	0.977177	NS or Estimate < 0.5
NDE1	lobule vs duct	-0.111567	0.624726	0.979657	NS or Estimate < 0.5
BANF1	lobule vs duct	0.14569	0.487341	0.96068	NS or Estimate < 0.5
TLE6	lobule vs duct	0.326293	0.164063	0.905106	NS or Estimate < 0.5
NBPF6	lobule vs duct	0.0721607	0.76281	0.990946	NS or Estimate < 0.5
WRAP53	lobule vs duct	0.0407718	0.885343	0.996428	NS or Estimate < 0.5
AMFR	lobule vs duct	-0.063782	0.770996	0.991114	NS or Estimate < 0.5
TMX2	lobule vs duct	-0.322017	0.153603	0.89277	NS or Estimate < 0.5
NHSL1	lobule vs duct	0.342045	0.113112	0.866349	NS or Estimate < 0.5
COPB1	lobule vs duct	-0.0813931	0.751968	0.989599	NS or Estimate < 0.5
ABCC3	lobule vs duct	0.245908	0.279443	0.938041	NS or Estimate < 0.5
LDHAL6A	lobule vs duct	0.125905	0.608203	0.978494	NS or Estimate < 0.5
DET1	lobule vs duct	0.0918407	0.69632	0.987106	NS or Estimate < 0.5
PHLDB1	lobule vs duct	-0.337911	0.185702	0.918008	NS or Estimate < 0.5
TLE2	lobule vs duct	0.141142	0.577743	0.974129	NS or Estimate < 0.5
DENND4A	lobule vs duct	-0.187235	0.400663	0.953648	NS or Estimate < 0.5
VSTM5	lobule vs duct	-0.262021	0.293329	0.941452	NS or Estimate < 0.5
DOK3	lobule vs duct	-0.0228971	0.913686	0.997475	NS or Estimate < 0.5
IMPA1	lobule vs duct	-0.206907	0.347268	0.947075	NS or Estimate < 0.5
MBIP	lobule vs duct	-0.124364	0.615161	0.978494	NS or Estimate < 0.5
MIEF2	lobule vs duct	-0.14538	0.51973	0.965306	NS or Estimate < 0.5
NKIRAS2	lobule vs duct	-0.266279	0.204205	0.918958	NS or Estimate < 0.5
MYL12B	lobule vs duct	0.222204	0.174915	0.916296	NS or Estimate < 0.5
MTHFD2L	lobule vs duct	0.0308276	0.901749	0.997475	NS or Estimate < 0.5
CCDC169	lobule vs duct	0.0481221	0.835485	0.994078	NS or Estimate < 0.5
ANG	lobule vs duct	0.049786	0.775318	0.991114	NS or Estimate < 0.5
MUC7	lobule vs duct	0.100052	0.705175	0.987325	NS or Estimate < 0.5
BTN3A1	lobule vs duct	-0.585068	0.00757189	0.665798	P < 0.05
SCRN2	lobule vs duct	0.224865	0.422738	0.956009	NS or Estimate < 0.5
PLET1	lobule vs duct	-0.029687	0.921675	0.997475	NS or Estimate < 0.5
PTPRQ	lobule vs duct	-0.150955	0.53862	0.96873	NS or Estimate < 0.5
IQCF5	lobule vs duct	-0.0417791	0.874142	0.995651	NS or Estimate < 0.5
COG6	lobule vs duct	0.374819	0.200491	0.918958	NS or Estimate < 0.5
ZNF619	lobule vs duct	0.127416	0.578916	0.974129	NS or Estimate < 0.5
RRP12	lobule vs duct	0.0969343	0.719096	0.988793	NS or Estimate < 0.5
CAPN14	lobule vs duct	-0.0569833	0.820853	0.994078	NS or Estimate < 0.5
SLC1A5	lobule vs duct	-0.04874	0.836361	0.994078	NS or Estimate < 0.5
CRHR1	lobule vs duct	-0.111879	0.684206	0.986766	NS or Estimate < 0.5
UBE2QL1	lobule vs duct	-0.19572	0.499284	0.962968	NS or Estimate < 0.5
FAM200B	lobule vs duct	0.577084	0.0245271	0.778435	P < 0.05
KIAA1671	lobule vs duct	-0.715213	0.00133183	0.526072	P < 0.05
ANKRD65	lobule vs duct	0.142117	0.585904	0.974129	NS or Estimate < 0.5
SLCO2B1	lobule vs duct	0.258884	0.293894	0.941452	NS or Estimate < 0.5
SP9	lobule vs duct	0.0261031	0.905723	0.997475	NS or Estimate < 0.5
LAMTOR2	lobule vs duct	-0.204359	0.431824	0.956132	NS or Estimate < 0.5
FAM185A	lobule vs duct	-0.231707	0.342127	0.946017	NS or Estimate < 0.5
NGLY1	lobule vs duct	-0.0901763	0.681623	0.986766	NS or Estimate < 0.5
EXOC7	lobule vs duct	-0.286203	0.239212	0.935075	NS or Estimate < 0.5
IQCN	lobule vs duct	-0.100154	0.657571	0.984743	NS or Estimate < 0.5
ETV3	lobule vs duct	-0.052204	0.680577	0.986766	NS or Estimate < 0.5
UBE2Q2	lobule vs duct	-0.100316	0.692304	0.986766	NS or Estimate < 0.5
MDM2	lobule vs duct	0.390952	0.122826	0.868129	NS or Estimate < 0.5
ZNF566	lobule vs duct	0.253978	0.217913	0.926916	NS or Estimate < 0.5
ZNF576	lobule vs duct	-0.114575	0.66916	0.986018	NS or Estimate < 0.5
IPP	lobule vs duct	-0.212044	0.455385	0.959008	NS or Estimate < 0.5
ELF1	lobule vs duct	-0.12253	0.707493	0.987325	NS or Estimate < 0.5
MKLN1	lobule vs duct	0.119286	0.65203	0.984018	NS or Estimate < 0.5
PTPN3	lobule vs duct	-0.0393993	0.876989	0.995971	NS or Estimate < 0.5
TSEN2	lobule vs duct	-0.0954222	0.71751	0.988328	NS or Estimate < 0.5
CCDC110	lobule vs duct	-0.485062	0.0544017	0.808632	NS or Estimate < 0.5
TMEM205	lobule vs duct	-0.288744	0.309934	0.943913	NS or Estimate < 0.5
MSL2	lobule vs duct	-0.0250033	0.911547	0.997475	NS or Estimate < 0.5
TTC28	lobule vs duct	0.463806	0.0912858	0.86201	NS or Estimate < 0.5
NR1D2	lobule vs duct	-0.0427211	0.872673	0.995651	NS or Estimate < 0.5
ZNF880	lobule vs duct	-0.353922	0.102766	0.866349	NS or Estimate < 0.5
SCAF4	lobule vs duct	-0.323815	0.162897	0.902837	NS or Estimate < 0.5
ZNF200	lobule vs duct	-0.0687697	0.76494	0.991114	NS or Estimate < 0.5
SCRN1	lobule vs duct	0.0466149	0.824628	0.994078	NS or Estimate < 0.5
YPEL3	lobule vs duct	-0.355915	0.102437	0.866349	NS or Estimate < 0.5
ZSCAN18	lobule vs duct	-0.090483	0.701989	0.987325	NS or Estimate < 0.5
TRIM45	lobule vs duct	0.0486789	0.839473	0.994078	NS or Estimate < 0.5
APH1B	lobule vs duct	0.336013	0.165695	0.907565	NS or Estimate < 0.5
ZNF529	lobule vs duct	-0.141226	0.560445	0.972277	NS or Estimate < 0.5
CTAGE9	lobule vs duct	-0.26298	0.186008	0.918008	NS or Estimate < 0.5
RFX8	lobule vs duct	-0.217261	0.457867	0.959728	NS or Estimate < 0.5
GLG1	lobule vs duct	-0.0917468	0.585236	0.974129	NS or Estimate < 0.5
SORBS2	lobule vs duct	0.554167	0.0202756	0.753165	P < 0.05
NUPR2	lobule vs duct	-0.222041	0.374053	0.949967	NS or Estimate < 0.5
CT47B1	lobule vs duct	0.13324	0.576911	0.974129	NS or Estimate < 0.5
FKBP5	lobule vs duct	-0.239288	0.294899	0.941452	NS or Estimate < 0.5
BORCS8	lobule vs duct	0.206976	0.421743	0.956009	NS or Estimate < 0.5
SH2B1	lobule vs duct	-0.163057	0.493719	0.960907	NS or Estimate < 0.5
MTFR1	lobule vs duct	0.439017	0.20055	0.918958	NS or Estimate < 0.5
SCAPER	lobule vs duct	-0.145375	0.526662	0.965823	NS or Estimate < 0.5
SLC13A2	lobule vs duct	-0.26234	0.307603	0.943536	NS or Estimate < 0.5
TJAP1	lobule vs duct	0.191172	0.429921	0.956009	NS or Estimate < 0.5
GORAB	lobule vs duct	0.409077	0.118885	0.868129	NS or Estimate < 0.5
GLRA1	lobule vs duct	0.113845	0.663409	0.985424	NS or Estimate < 0.5
HSDL1	lobule vs duct	0.155042	0.54959	0.970778	NS or Estimate < 0.5
CLDN14	lobule vs duct	-0.120904	0.66911	0.986018	NS or Estimate < 0.5
FAN1	lobule vs duct	-0.143865	0.59108	0.974353	NS or Estimate < 0.5
PTGR1	lobule vs duct	-0.0469053	0.836514	0.994078	NS or Estimate < 0.5
FAM25A	lobule vs duct	0.493454	0.0150205	0.718044	NS or Estimate < 0.5
TRIM77	lobule vs duct	-0.13752	0.579663	0.974129	NS or Estimate < 0.5
ZNF407	lobule vs duct	-0.0139951	0.9575	0.997475	NS or Estimate < 0.5
PIP4K2C	lobule vs duct	0.1362	0.580847	0.974129	NS or Estimate < 0.5
GPR85	lobule vs duct	-0.0598128	0.826474	0.994078	NS or Estimate < 0.5
TCF7L2	lobule vs duct	-0.077313	0.758968	0.99042	NS or Estimate < 0.5
SRP54	lobule vs duct	-0.0477797	0.813358	0.993814	NS or Estimate < 0.5
P3H1	lobule vs duct	0.163419	0.509517	0.96385	NS or Estimate < 0.5
MYOCD	lobule vs duct	0.0412626	0.881947	0.996428	NS or Estimate < 0.5
SPSB2	lobule vs duct	0.370975	0.117336	0.868129	NS or Estimate < 0.5
GRAMD2B	lobule vs duct	-0.199437	0.412587	0.955629	NS or Estimate < 0.5
TMEM88B	lobule vs duct	-0.112571	0.623037	0.979657	NS or Estimate < 0.5
KDM4C	lobule vs duct	-0.263764	0.243044	0.935075	NS or Estimate < 0.5
RBM19	lobule vs duct	0.176551	0.440587	0.957434	NS or Estimate < 0.5
ANK3	lobule vs duct	-0.154427	0.487606	0.96068	NS or Estimate < 0.5
ANPEP	lobule vs duct	0.612155	0.015726	0.724241	P < 0.05
ANXA4	lobule vs duct	-0.0602272	0.759282	0.990578	NS or Estimate < 0.5
ANXA5	lobule vs duct	0.0657706	0.742415	0.989227	NS or Estimate < 0.5
SEPTIN12	lobule vs duct	0.157359	0.570338	0.97403	NS or Estimate < 0.5
ANXA6	lobule vs duct	-0.0119324	0.961357	0.997515	NS or Estimate < 0.5
ANXA7	lobule vs duct	-0.152051	0.578598	0.974129	NS or Estimate < 0.5
ZNF716	lobule vs duct	-0.245703	0.345276	0.946017	NS or Estimate < 0.5
MTHFSD	lobule vs duct	-0.14327	0.479687	0.96068	NS or Estimate < 0.5
ZNF727	lobule vs duct	0.0503084	0.821608	0.994078	NS or Estimate < 0.5
BIVM	lobule vs duct	-0.207691	0.447094	0.957465	NS or Estimate < 0.5
SH3YL1	lobule vs duct	0.172587	0.453842	0.958278	NS or Estimate < 0.5
MCTP2	lobule vs duct	0.33009	0.234635	0.935075	NS or Estimate < 0.5
SYNCRIP	lobule vs duct	0.157663	0.501375	0.962968	NS or Estimate < 0.5
BUD13	lobule vs duct	-0.274719	0.28027	0.938041	NS or Estimate < 0.5
CANT1	lobule vs duct	0.174132	0.448004	0.957465	NS or Estimate < 0.5
EVI5L	lobule vs duct	-0.00799199	0.973209	0.998973	NS or Estimate < 0.5
EPS15	lobule vs duct	0.12627	0.630632	0.980053	NS or Estimate < 0.5
CLDN10	lobule vs duct	0.102067	0.719357	0.988793	NS or Estimate < 0.5
C15orf40	lobule vs duct	-0.0326845	0.92093	0.997475	NS or Estimate < 0.5
MGAT4A	lobule vs duct	-0.0199567	0.938315	0.997475	NS or Estimate < 0.5
SLC25A13	lobule vs duct	-0.444064	0.0478608	0.808632	NS or Estimate < 0.5
RNF170	lobule vs duct	-0.184464	0.412519	0.955629	NS or Estimate < 0.5
SPG11	lobule vs duct	-0.112934	0.662289	0.985424	NS or Estimate < 0.5
SETD6	lobule vs duct	0.0770026	0.760825	0.990946	NS or Estimate < 0.5
TRAPPC9	lobule vs duct	-0.0364234	0.863244	0.994392	NS or Estimate < 0.5
POLR3B	lobule vs duct	-0.0732213	0.778393	0.991114	NS or Estimate < 0.5
NPTN	lobule vs duct	-0.656373	0.00910546	0.69134	P < 0.05
CYB561A3	lobule vs duct	0.0359553	0.867422	0.994854	NS or Estimate < 0.5
JMJD4	lobule vs duct	-0.161115	0.493807	0.960907	NS or Estimate < 0.5
PLEKHD1	lobule vs duct	0.240764	0.411415	0.955629	NS or Estimate < 0.5
MAFF	lobule vs duct	-0.160977	0.573218	0.974129	NS or Estimate < 0.5
SAMD4A	lobule vs duct	0.471646	0.109666	0.866349	NS or Estimate < 0.5
DUS3L	lobule vs duct	0.205068	0.436537	0.956132	NS or Estimate < 0.5
KDM4E	lobule vs duct	0.457306	0.0489586	0.808632	NS or Estimate < 0.5
WWC1	lobule vs duct	0.083751	0.775507	0.991114	NS or Estimate < 0.5
FXN	lobule vs duct	0.303919	0.184724	0.918008	NS or Estimate < 0.5
AHCY	lobule vs duct	-0.378976	0.160067	0.895972	NS or Estimate < 0.5
SPATA48	lobule vs duct	0.471618	0.0712922	0.839063	NS or Estimate < 0.5
PDCD6IP	lobule vs duct	0.260028	0.285267	0.938041	NS or Estimate < 0.5
SH3D21	lobule vs duct	0.226913	0.246435	0.935075	NS or Estimate < 0.5
KIAA0040	lobule vs duct	-0.259505	0.297224	0.941452	NS or Estimate < 0.5
PLXNB3	lobule vs duct	0.132569	0.588861	0.974129	NS or Estimate < 0.5
PCYT1B	lobule vs duct	-0.0801378	0.778313	0.991114	NS or Estimate < 0.5
FBXL17	lobule vs duct	0.0746365	0.744719	0.989227	NS or Estimate < 0.5
CCDC120	lobule vs duct	0.0186775	0.93366	0.997475	NS or Estimate < 0.5
RAB2B	lobule vs duct	0.203734	0.302096	0.941452	NS or Estimate < 0.5
FAM172A	lobule vs duct	-0.11266	0.672959	0.986018	NS or Estimate < 0.5
ZNF580	lobule vs duct	-0.376333	0.100792	0.864808	NS or Estimate < 0.5
TWNK	lobule vs duct	0.0630527	0.781448	0.991441	NS or Estimate < 0.5
VSIG10L	lobule vs duct	0.0722745	0.746558	0.989599	NS or Estimate < 0.5
FAM170A	lobule vs duct	0.0899836	0.722721	0.989	NS or Estimate < 0.5
APBB1	lobule vs duct	0.0173374	0.945371	0.997475	NS or Estimate < 0.5
PPP6R3	lobule vs duct	0.0419693	0.867391	0.994854	NS or Estimate < 0.5
PLIN3	lobule vs duct	0.0123397	0.961649	0.997515	NS or Estimate < 0.5
DDHD2	lobule vs duct	-0.229698	0.278797	0.938041	NS or Estimate < 0.5
ODR4	lobule vs duct	-0.236448	0.444463	0.957465	NS or Estimate < 0.5
PRR29	lobule vs duct	-0.235843	0.42471	0.956009	NS or Estimate < 0.5
TRAF3IP2	lobule vs duct	-0.498931	0.0726293	0.840077	NS or Estimate < 0.5
FLNB	lobule vs duct	0.0207597	0.927997	0.997475	NS or Estimate < 0.5
BRD8	lobule vs duct	-0.275842	0.305958	0.941452	NS or Estimate < 0.5
MRGPRG	lobule vs duct	0.382253	0.107737	0.866349	NS or Estimate < 0.5
FAM180B	lobule vs duct	-0.117353	0.655148	0.984358	NS or Estimate < 0.5
MTF2	lobule vs duct	0.0316251	0.893183	0.996984	NS or Estimate < 0.5
ARHGAP40	lobule vs duct	-0.120325	0.535291	0.966993	NS or Estimate < 0.5
SHISAL2B	lobule vs duct	0.390661	0.154379	0.89277	NS or Estimate < 0.5
C5orf63	lobule vs duct	0.434298	0.0575895	0.809858	NS or Estimate < 0.5
CFAP44	lobule vs duct	-0.114549	0.63875	0.981798	NS or Estimate < 0.5
IYD	lobule vs duct	0.603492	0.0143113	0.718044	P < 0.05
ZNF605	lobule vs duct	0.280512	0.251271	0.935075	NS or Estimate < 0.5
ARHGAP4	lobule vs duct	-0.0676504	0.810923	0.993639	NS or Estimate < 0.5
NPAS3	lobule vs duct	0.184543	0.49788	0.962968	NS or Estimate < 0.5
ACIN1	lobule vs duct	-0.300895	0.219269	0.926916	NS or Estimate < 0.5
FXYD6	lobule vs duct	-0.214045	0.471066	0.96068	NS or Estimate < 0.5
TMEM41B	lobule vs duct	-0.106502	0.658361	0.984891	NS or Estimate < 0.5
HERC6	lobule vs duct	0.142391	0.587041	0.974129	NS or Estimate < 0.5
LDHA	lobule vs duct	0.0602656	0.776933	0.991114	NS or Estimate < 0.5
ZNF268	lobule vs duct	0.334282	0.183878	0.918008	NS or Estimate < 0.5
MKS1	lobule vs duct	0.199777	0.474612	0.96068	NS or Estimate < 0.5
DAG1	lobule vs duct	0.351556	0.136806	0.874648	NS or Estimate < 0.5
STARD3	lobule vs duct	-0.00188872	0.993666	0.99925	NS or Estimate < 0.5
HES7	lobule vs duct	0.28435	0.186432	0.918008	NS or Estimate < 0.5
PROM2	lobule vs duct	0.210811	0.37438	0.949967	NS or Estimate < 0.5
BIRC2	lobule vs duct	-0.178796	0.529465	0.965823	NS or Estimate < 0.5
EPB41	lobule vs duct	0.251484	0.298083	0.941452	NS or Estimate < 0.5
NDUFS2	lobule vs duct	-0.221542	0.345255	0.946017	NS or Estimate < 0.5
HAUS4	lobule vs duct	-0.106223	0.674467	0.986018	NS or Estimate < 0.5
ARHGAP25	lobule vs duct	-0.141729	0.608638	0.978494	NS or Estimate < 0.5
RGMA	lobule vs duct	-0.552113	0.0152091	0.718044	P < 0.05
SLC26A11	lobule vs duct	0.366422	0.12416	0.868129	NS or Estimate < 0.5
SHMT2	lobule vs duct	0.158652	0.530507	0.965823	NS or Estimate < 0.5
MTUS1	lobule vs duct	-0.488728	0.0856027	0.858178	NS or Estimate < 0.5
SMOC2	lobule vs duct	0.358848	0.171282	0.914275	NS or Estimate < 0.5
EHHADH	lobule vs duct	0.626261	0.0130794	0.715241	P < 0.05
MPP1	lobule vs duct	-0.490588	0.0656107	0.824341	NS or Estimate < 0.5
FAM122B	lobule vs duct	0.042975	0.856464	0.994375	NS or Estimate < 0.5
AFF1	lobule vs duct	-0.560639	0.03331	0.792131	P < 0.05
FAM104B	lobule vs duct	-0.0551435	0.783176	0.991441	NS or Estimate < 0.5
XIAP	lobule vs duct	0.128164	0.556551	0.972277	NS or Estimate < 0.5
CAAP1	lobule vs duct	0.309329	0.200462	0.918958	NS or Estimate < 0.5
NEU4	lobule vs duct	-0.118295	0.651598	0.984018	NS or Estimate < 0.5
RAB35	lobule vs duct	0.204111	0.509257	0.963763	NS or Estimate < 0.5
DMAC2	lobule vs duct	-0.171534	0.510076	0.964196	NS or Estimate < 0.5
CMSS1	lobule vs duct	-0.146921	0.612779	0.978494	NS or Estimate < 0.5
TNFAIP8L1	lobule vs duct	0.253384	0.250938	0.935075	NS or Estimate < 0.5
TMEM178A	lobule vs duct	-0.414166	0.072086	0.839369	NS or Estimate < 0.5
KCTD7	lobule vs duct	0.279765	0.311369	0.943913	NS or Estimate < 0.5
BIRC5	lobule vs duct	-0.0392036	0.829464	0.994078	NS or Estimate < 0.5
C3orf80	lobule vs duct	-0.438915	0.116764	0.868129	NS or Estimate < 0.5
TBC1D17	lobule vs duct	0.119802	0.612423	0.978494	NS or Estimate < 0.5
WWTR1	lobule vs duct	-0.251221	0.300301	0.941452	NS or Estimate < 0.5
EDN1	lobule vs duct	-0.0559114	0.85624	0.994375	NS or Estimate < 0.5
TESC	lobule vs duct	-0.189372	0.436542	0.956132	NS or Estimate < 0.5
TTC39B	lobule vs duct	-0.035659	0.868996	0.995493	NS or Estimate < 0.5
KRTCAP3	lobule vs duct	-0.169989	0.501631	0.962968	NS or Estimate < 0.5
CUL7	lobule vs duct	-0.0226202	0.927553	0.997475	NS or Estimate < 0.5
BEX2	lobule vs duct	-0.0777594	0.75276	0.989599	NS or Estimate < 0.5
PDZD3	lobule vs duct	-0.23139	0.375957	0.949967	NS or Estimate < 0.5
IFT46	lobule vs duct	-0.364284	0.15712	0.89348	NS or Estimate < 0.5
SAP25	lobule vs duct	-0.404014	0.12927	0.87139	NS or Estimate < 0.5
AQP7	lobule vs duct	-0.273712	0.202126	0.918958	NS or Estimate < 0.5
TJP2	lobule vs duct	-0.228163	0.400877	0.953648	NS or Estimate < 0.5
DZIP1L	lobule vs duct	0.279018	0.242717	0.935075	NS or Estimate < 0.5
HHAT	lobule vs duct	-0.361231	0.12685	0.87139	NS or Estimate < 0.5
LAS1L	lobule vs duct	-0.420608	0.0473648	0.808632	NS or Estimate < 0.5
MFSD5	lobule vs duct	-0.316484	0.1412	0.882606	NS or Estimate < 0.5
ZNF736	lobule vs duct	0.00953467	0.971103	0.998973	NS or Estimate < 0.5
STRBP	lobule vs duct	0.233104	0.345338	0.946017	NS or Estimate < 0.5
PET100	lobule vs duct	0.12146	0.639314	0.981798	NS or Estimate < 0.5
ZMYM3	lobule vs duct	-0.1207	0.570959	0.974094	NS or Estimate < 0.5
UBAP1	lobule vs duct	-0.0169546	0.938889	0.997475	NS or Estimate < 0.5
ZEB2	lobule vs duct	-0.397374	0.202419	0.918958	NS or Estimate < 0.5
C3orf52	lobule vs duct	-0.12539	0.622936	0.979657	NS or Estimate < 0.5
NUDT16	lobule vs duct	0.215381	0.404275	0.953648	NS or Estimate < 0.5
KXD1	lobule vs duct	-0.07236	0.736272	0.989227	NS or Estimate < 0.5
AGA	lobule vs duct	0.14006	0.580392	0.974129	NS or Estimate < 0.5
TBP	lobule vs duct	-0.224281	0.329671	0.944973	NS or Estimate < 0.5
ZNF540	lobule vs duct	0.492739	0.0022212	0.584917	NS or Estimate < 0.5
MASTL	lobule vs duct	0.131586	0.618748	0.979657	NS or Estimate < 0.5
PLS3	lobule vs duct	-0.394061	0.104013	0.866349	NS or Estimate < 0.5
KCNJ13	lobule vs duct	-0.541938	0.0136574	0.715622	P < 0.05
EFHC1	lobule vs duct	-0.173037	0.531448	0.965823	NS or Estimate < 0.5
KLHL7	lobule vs duct	0.120231	0.660947	0.985424	NS or Estimate < 0.5
GOLGA3	lobule vs duct	0.320353	0.145566	0.890408	NS or Estimate < 0.5
TECPR2	lobule vs duct	-0.075625	0.733321	0.989227	NS or Estimate < 0.5
ZFP62	lobule vs duct	0.0819686	0.746048	0.989599	NS or Estimate < 0.5
ZNF177	lobule vs duct	0.0688216	0.790221	0.99183	NS or Estimate < 0.5
ZFYVE28	lobule vs duct	-0.0490419	0.8372	0.994078	NS or Estimate < 0.5
RAB40C	lobule vs duct	0.023171	0.921169	0.997475	NS or Estimate < 0.5
TSFM	lobule vs duct	0.0832095	0.695448	0.987106	NS or Estimate < 0.5
SLC38A6	lobule vs duct	-0.00725181	0.97977	0.99925	NS or Estimate < 0.5
PGM1	lobule vs duct	-0.0896923	0.659803	0.985197	NS or Estimate < 0.5
YTHDF2	lobule vs duct	0.197995	0.436342	0.956132	NS or Estimate < 0.5
KIF21A	lobule vs duct	-0.568054	0.0134193	0.715241	P < 0.05
SP7	lobule vs duct	-0.146097	0.579609	0.974129	NS or Estimate < 0.5
ARHGEF9	lobule vs duct	0.462268	0.0845619	0.857147	NS or Estimate < 0.5
NEBL	lobule vs duct	-0.0838935	0.764082	0.991114	NS or Estimate < 0.5
MAN2B1	lobule vs duct	0.104358	0.620839	0.979657	NS or Estimate < 0.5
MRRF	lobule vs duct	0.0701464	0.775246	0.991114	NS or Estimate < 0.5
TXNRD3	lobule vs duct	0.16465	0.501306	0.962968	NS or Estimate < 0.5
DGCR2	lobule vs duct	-0.270145	0.26029	0.935075	NS or Estimate < 0.5
BRD7	lobule vs duct	-0.247147	0.278833	0.938041	NS or Estimate < 0.5
SPAM1	lobule vs duct	0.105358	0.724264	0.989	NS or Estimate < 0.5
OSBPL10	lobule vs duct	-0.165638	0.447087	0.957465	NS or Estimate < 0.5
SERINC5	lobule vs duct	0.023686	0.927433	0.997475	NS or Estimate < 0.5
POLL	lobule vs duct	-0.0568147	0.817369	0.994078	NS or Estimate < 0.5
LDHB	lobule vs duct	0.164584	0.292631	0.941452	NS or Estimate < 0.5
PRR7	lobule vs duct	-0.0514718	0.832631	0.994078	NS or Estimate < 0.5
DMXL2	lobule vs duct	-0.45006	0.120197	0.868129	NS or Estimate < 0.5
GOLGA7	lobule vs duct	0.441745	0.0746862	0.842887	NS or Estimate < 0.5
RABEPK	lobule vs duct	-0.0109858	0.958547	0.997475	NS or Estimate < 0.5
ARHGDIB	lobule vs duct	0.752046	0.00559055	0.663046	P < 0.05
ARL1	lobule vs duct	-0.147438	0.569879	0.97403	NS or Estimate < 0.5
SLC34A3	lobule vs duct	-0.391608	0.113814	0.866349	NS or Estimate < 0.5
CPEB2	lobule vs duct	0.0913256	0.730426	0.989146	NS or Estimate < 0.5
LGALS3	lobule vs duct	-0.304036	0.13097	0.87139	NS or Estimate < 0.5
MAMLD1	lobule vs duct	0.429608	0.0967748	0.864096	NS or Estimate < 0.5
PPP2R2A	lobule vs duct	-0.146729	0.57411	0.974129	NS or Estimate < 0.5
SUCLG2	lobule vs duct	0.386863	0.0932535	0.863456	NS or Estimate < 0.5
CD33	lobule vs duct	0.585882	0.0296303	0.792131	P < 0.05
RIF1	lobule vs duct	-0.0889889	0.727575	0.989	NS or Estimate < 0.5
KLF11	lobule vs duct	0.270426	0.313057	0.944973	NS or Estimate < 0.5
SRPRA	lobule vs duct	-0.124002	0.586153	0.974129	NS or Estimate < 0.5
SYCP3	lobule vs duct	0.032367	0.908651	0.997475	NS or Estimate < 0.5
PHETA1	lobule vs duct	-0.372565	0.13393	0.87348	NS or Estimate < 0.5
BHMT2	lobule vs duct	0.117401	0.624075	0.979657	NS or Estimate < 0.5
STX3	lobule vs duct	0.0792385	0.724542	0.989	NS or Estimate < 0.5
SYNJ2	lobule vs duct	0.495795	0.064282	0.824341	NS or Estimate < 0.5
ZNF182	lobule vs duct	-0.129085	0.626438	0.979657	NS or Estimate < 0.5
SCAMP5	lobule vs duct	-0.324096	0.14696	0.890704	NS or Estimate < 0.5
IGLL5	lobule vs duct	-0.912195	0.153748	0.89277	NS or Estimate < 0.5
SUFU	lobule vs duct	0.2877	0.27821	0.938041	NS or Estimate < 0.5
ASGR2	lobule vs duct	0.00690066	0.97948	0.99925	NS or Estimate < 0.5
ATP6AP1	lobule vs duct	-0.339362	0.214821	0.926916	NS or Estimate < 0.5
ATR	lobule vs duct	-0.293282	0.196453	0.918958	NS or Estimate < 0.5
GYG2	lobule vs duct	-0.0175939	0.957828	0.997475	NS or Estimate < 0.5
HADH	lobule vs duct	0.121081	0.648507	0.983152	NS or Estimate < 0.5
SLAMF6	lobule vs duct	0.311903	0.237599	0.935075	NS or Estimate < 0.5
PIGT	lobule vs duct	0.365922	0.167425	0.911209	NS or Estimate < 0.5
CTTN	lobule vs duct	0.139985	0.549666	0.970778	NS or Estimate < 0.5
CLTA	lobule vs duct	-0.073651	0.719673	0.988793	NS or Estimate < 0.5
TMLHE	lobule vs duct	-0.0769129	0.706791	0.987325	NS or Estimate < 0.5
PRMT7	lobule vs duct	0.176665	0.434103	0.956132	NS or Estimate < 0.5
KLHDC4	lobule vs duct	0.0835849	0.749121	0.989599	NS or Estimate < 0.5
PHF8	lobule vs duct	-0.139816	0.500041	0.962968	NS or Estimate < 0.5
CARD8	lobule vs duct	-0.198389	0.39651	0.952751	NS or Estimate < 0.5
PACSIN2	lobule vs duct	-0.282721	0.267969	0.936241	NS or Estimate < 0.5
RNF17	lobule vs duct	-0.241053	0.386297	0.952375	NS or Estimate < 0.5
MARF1	lobule vs duct	0.366299	0.0943655	0.863664	NS or Estimate < 0.5
NDUFA2	lobule vs duct	-0.379681	0.08255	0.857052	NS or Estimate < 0.5
CLDN11	lobule vs duct	0.228403	0.38713	0.952375	NS or Estimate < 0.5
TUT7	lobule vs duct	-0.121166	0.603933	0.978494	NS or Estimate < 0.5
ARHGDIA	lobule vs duct	-0.0354306	0.880788	0.996428	NS or Estimate < 0.5
NIT1	lobule vs duct	-0.100717	0.678678	0.986766	NS or Estimate < 0.5
PLCXD2	lobule vs duct	0.218258	0.416389	0.955629	NS or Estimate < 0.5
CES3	lobule vs duct	-0.0910521	0.732276	0.989146	NS or Estimate < 0.5
BACH1	lobule vs duct	-0.580003	0.00650977	0.663046	P < 0.05
BAK1	lobule vs duct	-0.372625	0.180485	0.917162	NS or Estimate < 0.5
BCAT2	lobule vs duct	0.0978537	0.716283	0.988295	NS or Estimate < 0.5
IFT80	lobule vs duct	-0.587132	0.00861597	0.69134	P < 0.05
RPH3AL	lobule vs duct	-0.280079	0.210689	0.925506	NS or Estimate < 0.5
TAF6	lobule vs duct	0.289882	0.22262	0.926916	NS or Estimate < 0.5
ZNF674	lobule vs duct	-0.0528559	0.840902	0.994078	NS or Estimate < 0.5
MTRNR2L1	lobule vs duct	0.258448	0.25501	0.935075	NS or Estimate < 0.5
KRTAP9-1	lobule vs duct	-0.306348	0.173974	0.916296	NS or Estimate < 0.5
CTH	lobule vs duct	0.341759	0.158189	0.895194	NS or Estimate < 0.5
MTRNR2L5	lobule vs duct	0.0628462	0.787726	0.99183	NS or Estimate < 0.5
ALS2CL	lobule vs duct	0.298599	0.224373	0.928799	NS or Estimate < 0.5
RALGPS1	lobule vs duct	-0.16071	0.541065	0.96924	NS or Estimate < 0.5
DHX35	lobule vs duct	-0.0847251	0.716379	0.988295	NS or Estimate < 0.5
PLEKHA5	lobule vs duct	-0.152133	0.541632	0.969257	NS or Estimate < 0.5
HYI	lobule vs duct	0.0550774	0.787233	0.99183	NS or Estimate < 0.5
FAM193B	lobule vs duct	-0.0475144	0.84164	0.994078	NS or Estimate < 0.5
PIWIL1	lobule vs duct	-0.106041	0.638955	0.981798	NS or Estimate < 0.5
[truncated: 8,272 more rows]
