# Supplementary material for: Single nuclei chromatin accessibility and transcriptomic map of breast tissues of women of diverse genetic ancestry
Source: bioRxiv preprint, doi:10.1101/2023.10.04.560911, version 1 (2023-10-06)
Supplement: Table S16 [file 560911_file26.xlsx]

## Sheet: Sheet 1
Table S16: Gene expression differences in ductal and lobular epithelial cells at timepoint 1
Feature	Comparison	Estimate	P	BH	sig_level
A2M	lobule vs duct	-0.332019	0.474074	0.964543	NS or Estimate < 0.5
NAT2	lobule vs duct	-0.0695116	0.824968	0.987647	NS or Estimate < 0.5
ACADM	lobule vs duct	-0.511432	0.166568	0.903491	NS or Estimate < 0.5
ACADS	lobule vs duct	-0.38144	0.234514	0.929074	NS or Estimate < 0.5
ACAT1	lobule vs duct	-0.369103	0.333619	0.948223	NS or Estimate < 0.5
PSEN1	lobule vs duct	-0.227452	0.566996	0.977041	NS or Estimate < 0.5
ADA	lobule vs duct	0.00383839	0.990312	0.99599	NS or Estimate < 0.5
SGCA	lobule vs duct	-0.47769	0.166669	0.903491	NS or Estimate < 0.5
AGL	lobule vs duct	0.13383	0.71399	0.980141	NS or Estimate < 0.5
ABCD1	lobule vs duct	0.662151	0.239317	0.929436	NS or Estimate < 0.5
ALDOB	lobule vs duct	-0.384465	0.637371	0.978398	NS or Estimate < 0.5
AMPD1	lobule vs duct	-0.299555	0.47683	0.964543	NS or Estimate < 0.5
APOC3	lobule vs duct	-0.0883922	0.833287	0.988336	NS or Estimate < 0.5
APOE	lobule vs duct	-0.0432269	0.918673	0.992422	NS or Estimate < 0.5
ASL	lobule vs duct	0.18848	0.553597	0.975314	NS or Estimate < 0.5
ASS1	lobule vs duct	-0.251448	0.41463	0.958249	NS or Estimate < 0.5
ATM	lobule vs duct	-0.252162	0.328224	0.948223	NS or Estimate < 0.5
AVPR2	lobule vs duct	-0.0695116	0.837103	0.988336	NS or Estimate < 0.5
BTK	lobule vs duct	-0.144853	0.631323	0.978398	NS or Estimate < 0.5
SERPING1	lobule vs duct	0.243044	0.549058	0.975314	NS or Estimate < 0.5
C3	lobule vs duct	-0.278862	0.540416	0.972838	NS or Estimate < 0.5
CBS	lobule vs duct	-1.2481	0.0114951	0.740092	P < 0.05
CD36	lobule vs duct	-0.04902	0.905817	0.991584	NS or Estimate < 0.5
CDK4	lobule vs duct	0.0630045	0.859103	0.99056	NS or Estimate < 0.5
CDKN1C	lobule vs duct	-0.159932	0.698321	0.979883	NS or Estimate < 0.5
LYST	lobule vs duct	-0.235273	0.610984	0.978398	NS or Estimate < 0.5
ERCC8	lobule vs duct	0.152711	0.681171	0.979679	NS or Estimate < 0.5
CLN3	lobule vs duct	-0.160465	0.693613	0.979679	NS or Estimate < 0.5
COL1A1	lobule vs duct	0.51527	0.223624	0.929074	NS or Estimate < 0.5
COL1A2	lobule vs duct	0.243131	0.51595	0.969961	NS or Estimate < 0.5
COL5A1	lobule vs duct	-0.0780467	0.84806	0.989309	NS or Estimate < 0.5
CPOX	lobule vs duct	-0.474385	0.371324	0.956368	NS or Estimate < 0.5
CPT2	lobule vs duct	-0.0402856	0.913178	0.991948	NS or Estimate < 0.5
CST3	lobule vs duct	0.0168892	0.963846	0.99599	NS or Estimate < 0.5
CSTB	lobule vs duct	0.423076	0.316485	0.947181	NS or Estimate < 0.5
CYP2D6	lobule vs duct	-0.216393	0.623704	0.978398	NS or Estimate < 0.5
DDB2	lobule vs duct	-0.518472	0.308258	0.947181	NS or Estimate < 0.5
DLD	lobule vs duct	0.559707	0.235916	0.929074	NS or Estimate < 0.5
EMD	lobule vs duct	-0.744713	0.0275672	0.814429	P < 0.05
EPB42	lobule vs duct	0.309937	0.350951	0.953059	NS or Estimate < 0.5
EPHX1	lobule vs duct	-0.140337	0.718815	0.980141	NS or Estimate < 0.5
ERCC5	lobule vs duct	-0.151397	0.665329	0.97862	NS or Estimate < 0.5
EXT1	lobule vs duct	0.55104	0.155764	0.895684	NS or Estimate < 0.5
F5	lobule vs duct	0.428869	0.335257	0.948223	NS or Estimate < 0.5
FABP2	lobule vs duct	-0.841877	0.124496	0.888435	NS or Estimate < 0.5
FANCA	lobule vs duct	0.0227189	0.9491	0.995249	NS or Estimate < 0.5
FAH	lobule vs duct	-0.4789	0.252665	0.93397	NS or Estimate < 0.5
FECH	lobule vs duct	-0.532837	0.0815641	0.879448	NS or Estimate < 0.5
FGFR2	lobule vs duct	0.253476	0.564353	0.977041	NS or Estimate < 0.5
FH	lobule vs duct	-0.0233963	0.94509	0.995249	NS or Estimate < 0.5
FUCA1	lobule vs duct	-0.0233963	0.944126	0.995249	NS or Estimate < 0.5
FUT1	lobule vs duct	0.0708255	0.881605	0.991584	NS or Estimate < 0.5
FUT6	lobule vs duct	-0.725833	0.0443248	0.833728	P < 0.05
GALC	lobule vs duct	-0.79865	0.083759	0.879448	NS or Estimate < 0.5
GALT	lobule vs duct	-0.0506311	0.911149	0.991799	NS or Estimate < 0.5
GBE1	lobule vs duct	-0.53938	0.0879938	0.879448	NS or Estimate < 0.5
GCDH	lobule vs duct	-0.262508	0.436833	0.958249	NS or Estimate < 0.5
GJA1	lobule vs duct	0.126009	0.754632	0.983929	NS or Estimate < 0.5
GK	lobule vs duct	0.320997	0.327802	0.948223	NS or Estimate < 0.5
GLI3	lobule vs duct	-0.593317	0.0965509	0.879448	NS or Estimate < 0.5
GP9	lobule vs duct	-0.291734	0.524574	0.969961	NS or Estimate < 0.5
GPI	lobule vs duct	0.271643	0.36616	0.956368	NS or Estimate < 0.5
GSN	lobule vs duct	-0.773069	0.194125	0.916861	NS or Estimate < 0.5
MSH6	lobule vs duct	0.152711	0.613028	0.978398	NS or Estimate < 0.5
GUSB	lobule vs duct	-0.855824	0.00326513	0.609689	P < 0.05
HADHA	lobule vs duct	-0.134507	0.653779	0.97862	NS or Estimate < 0.5
HADHB	lobule vs duct	-0.216393	0.440327	0.958249	NS or Estimate < 0.5
HBG2	lobule vs duct	-0.41138	0.269262	0.941359	NS or Estimate < 0.5
HGD	lobule vs duct	0.291056	0.388452	0.958249	NS or Estimate < 0.5
HK1	lobule vs duct	0.163056	0.719726	0.980141	NS or Estimate < 0.5
HK2	lobule vs duct	-0.89088	0.042743	0.829775	P < 0.05
HPRT1	lobule vs duct	0.465353	0.239756	0.929436	NS or Estimate < 0.5
HPS1	lobule vs duct	0.106595	0.808643	0.98763	NS or Estimate < 0.5
HSD11B2	lobule vs duct	-0.402845	0.204403	0.92391	NS or Estimate < 0.5
HSD3B2	lobule vs duct	-0.310614	0.472905	0.964543	NS or Estimate < 0.5
SGSH	lobule vs duct	-0.593317	0.0536305	0.847632	NS or Estimate < 0.5
IDS	lobule vs duct	-0.492551	0.21727	0.929074	NS or Estimate < 0.5
IDUA	lobule vs duct	-0.838935	0.0648494	0.850795	NS or Estimate < 0.5
INSR	lobule vs duct	-0.35673	0.373415	0.956886	NS or Estimate < 0.5
PDX1	lobule vs duct	-0.35673	0.485589	0.966712	NS or Estimate < 0.5
ITGA6	lobule vs duct	-0.373619	0.400688	0.958249	NS or Estimate < 0.5
JAG1	lobule vs duct	-0.245619	0.524447	0.969961	NS or Estimate < 0.5
JAK3	lobule vs duct	-0.704428	0.0639922	0.849867	NS or Estimate < 0.5
KRT12	lobule vs duct	-0.33984	0.475176	0.964543	NS or Estimate < 0.5
KRT18	lobule vs duct	0.192004	0.393875	0.958249	NS or Estimate < 0.5
LAMA3	lobule vs duct	0.177004	0.573247	0.977041	NS or Estimate < 0.5
LAMB3	lobule vs duct	0.306099	0.387144	0.958249	NS or Estimate < 0.5
SGCB	lobule vs duct	-0.028329	0.940296	0.994781	NS or Estimate < 0.5
LIPA	lobule vs duct	0.214401	0.449023	0.958249	NS or Estimate < 0.5
MLH1	lobule vs duct	-0.329495	0.500775	0.969783	NS or Estimate < 0.5
MTM1	lobule vs duct	-0.389261	0.304859	0.947181	NS or Estimate < 0.5
MTR	lobule vs duct	-0.281388	0.465707	0.962875	NS or Estimate < 0.5
MMUT	lobule vs duct	0.681031	0.0344883	0.824123	P < 0.05
PTCH1	lobule vs duct	0.165047	0.671215	0.979277	NS or Estimate < 0.5
NCF1	lobule vs duct	-0.725833	0.0487943	0.847619	P < 0.05
NDP	lobule vs duct	0.10912	0.77515	0.984172	NS or Estimate < 0.5
NF1	lobule vs duct	-0.0448013	0.894601	0.991584	NS or Estimate < 0.5
PNP	lobule vs duct	-0.341154	0.293908	0.947181	NS or Estimate < 0.5
NPC1	lobule vs duct	-0.0526224	0.880667	0.991584	NS or Estimate < 0.5
OAT	lobule vs duct	0.257535	0.519629	0.969961	NS or Estimate < 0.5
PAX6	lobule vs duct	-0.549726	0.238665	0.929346	NS or Estimate < 0.5
PCBD1	lobule vs duct	-0.241103	0.538862	0.972654	NS or Estimate < 0.5
PDHA1	lobule vs duct	-0.022119	0.944905	0.995249	NS or Estimate < 0.5
PEPD	lobule vs duct	0.697921	0.0180891	0.775073	P < 0.05
PEX12	lobule vs duct	-0.0526224	0.878733	0.991584	NS or Estimate < 0.5
PEX6	lobule vs duct	-0.469869	0.241603	0.931251	NS or Estimate < 0.5
PEX7	lobule vs duct	0.725155	0.0660247	0.850795	NS or Estimate < 0.5
PFKM	lobule vs duct	0.177421	0.688447	0.979679	NS or Estimate < 0.5
PGK1	lobule vs duct	0.0551835	0.851484	0.990008	NS or Estimate < 0.5
PHKA2	lobule vs duct	0.257278	0.536764	0.971549	NS or Estimate < 0.5
PHKB	lobule vs duct	-0.270329	0.578432	0.977041	NS or Estimate < 0.5
PHKG2	lobule vs duct	-0.652483	0.0232358	0.795693	P < 0.05
SERPINA1	lobule vs duct	-0.137813	0.79967	0.986234	NS or Estimate < 0.5
PKD2	lobule vs duct	-0.206047	0.556514	0.975755	NS or Estimate < 0.5
PKP1	lobule vs duct	-0.845479	0.0487043	0.847619	P < 0.05
PLA2G2A	lobule vs duct	0.583207	0.268828	0.941359	NS or Estimate < 0.5
PLOD1	lobule vs duct	-0.685547	0.0509719	0.847632	NS or Estimate < 0.5
PMM2	lobule vs duct	0.259306	0.588561	0.977041	NS or Estimate < 0.5
PMP22	lobule vs duct	-0.316444	0.442998	0.958249	NS or Estimate < 0.5
PON2	lobule vs duct	0.358044	0.17141	0.907705	NS or Estimate < 0.5
POU3F4	lobule vs duct	-0.582971	0.0108077	0.738525	P < 0.05
PRNP	lobule vs duct	-0.000457345	0.998575	0.998867	NS or Estimate < 0.5
PROC	lobule vs duct	0.439929	0.198665	0.917019	NS or Estimate < 0.5
PROS1	lobule vs duct	0.00835417	0.984262	0.99599	NS or Estimate < 0.5
PTH	lobule vs duct	-0.482206	0.208716	0.927527	NS or Estimate < 0.5
PTH1R	lobule vs duct	-0.0162893	0.973119	0.99599	NS or Estimate < 0.5
PTS	lobule vs duct	0.52633	0.246357	0.931854	NS or Estimate < 0.5
QDPR	lobule vs duct	0.00582971	0.987138	0.99599	NS or Estimate < 0.5
RB1	lobule vs duct	0.0688342	0.862423	0.99056	NS or Estimate < 0.5
PITX2	lobule vs duct	-0.983825	0.0177355	0.775073	P < 0.05
RS1	lobule vs duct	0.311928	0.474477	0.964543	NS or Estimate < 0.5
ATXN1	lobule vs duct	-0.424667	0.417408	0.958249	NS or Estimate < 0.5
SGCD	lobule vs duct	-0.0780467	0.801478	0.986602	NS or Estimate < 0.5
SLC2A2	lobule vs duct	0.0415995	0.90307	0.991584	NS or Estimate < 0.5
SLC3A1	lobule vs duct	-0.00903155	0.977265	0.99599	NS or Estimate < 0.5
SLC5A1	lobule vs duct	-1.1781	0.00616771	0.677763	P < 0.05
SMN1	lobule vs duct	0.461334	0.42069	0.958249	NS or Estimate < 0.5
SNCA	lobule vs duct	-0.790829	0.0122548	0.745351	P < 0.05
TCOF1	lobule vs duct	-0.245619	0.467807	0.964541	NS or Estimate < 0.5
TIMP3	lobule vs duct	-0.361662	0.263356	0.941091	NS or Estimate < 0.5
TPI1	lobule vs duct	-0.679718	0.0855781	0.879448	NS or Estimate < 0.5
TPM1	lobule vs duct	-0.0238524	0.92778	0.994008	NS or Estimate < 0.5
TPMT	lobule vs duct	0.123485	0.782596	0.984172	NS or Estimate < 0.5
TSC1	lobule vs duct	-0.300269	0.423431	0.958249	NS or Estimate < 0.5
UROS	lobule vs duct	-0.270329	0.54161	0.973325	NS or Estimate < 0.5
XDH	lobule vs duct	0.622579	0.153229	0.895684	NS or Estimate < 0.5
XPA	lobule vs duct	0.152711	0.573725	0.977041	NS or Estimate < 0.5
AIRE	lobule vs duct	0.0630045	0.857003	0.99056	NS or Estimate < 0.5
APOB	lobule vs duct	-0.382154	0.455145	0.961954	NS or Estimate < 0.5
BLMH	lobule vs duct	-0.643948	0.170895	0.907705	NS or Estimate < 0.5
TPP1	lobule vs duct	-0.0506311	0.895937	0.991584	NS or Estimate < 0.5
COL5A2	lobule vs duct	-0.363273	0.406378	0.958249	NS or Estimate < 0.5
CTSK	lobule vs duct	-0.0760554	0.872981	0.991267	NS or Estimate < 0.5
CYBB	lobule vs duct	0.198826	0.63169	0.978398	NS or Estimate < 0.5
CYB5R3	lobule vs duct	-0.0591661	0.872122	0.991267	NS or Estimate < 0.5
ERCC2	lobule vs duct	-0.371094	0.357115	0.954548	NS or Estimate < 0.5
G6PD	lobule vs duct	0.623857	0.15998	0.901294	NS or Estimate < 0.5
GM2A	lobule vs duct	0.256001	0.480206	0.965866	NS or Estimate < 0.5
HLCS	lobule vs duct	-0.574436	0.181913	0.915918	NS or Estimate < 0.5
HSD17B4	lobule vs duct	0.14489	0.677697	0.979679	NS or Estimate < 0.5
IFNGR1	lobule vs duct	0.26002	0.429829	0.958249	NS or Estimate < 0.5
IL2RA	lobule vs duct	-0.199503	0.672036	0.97964	NS or Estimate < 0.5
KRT17	lobule vs duct	0.698378	0.198379	0.917019	NS or Estimate < 0.5
LTBP2	lobule vs duct	0.152711	0.714187	0.980141	NS or Estimate < 0.5
PAFAH1B1	lobule vs duct	-0.105281	0.805789	0.98763	NS or Estimate < 0.5
MVK	lobule vs duct	0.662151	0.142748	0.895684	NS or Estimate < 0.5
NOTCH3	lobule vs duct	-0.360035	0.361422	0.954587	NS or Estimate < 0.5
PAFAH2	lobule vs duct	-0.526293	0.164561	0.90165	NS or Estimate < 0.5
PLEC	lobule vs duct	-0.714437	0.0896018	0.879448	NS or Estimate < 0.5
PSEN2	lobule vs duct	0.616036	0.114339	0.885803	NS or Estimate < 0.5
SLC10A2	lobule vs duct	-0.151397	0.664892	0.97862	NS or Estimate < 0.5
SLC5A5	lobule vs duct	-0.629086	0.0579806	0.847632	NS or Estimate < 0.5
AK1	lobule vs duct	-0.0402856	0.90811	0.991584	NS or Estimate < 0.5
ALPL	lobule vs duct	-0.141051	0.696524	0.979679	NS or Estimate < 0.5
AMH	lobule vs duct	-0.614722	0.104061	0.885803	NS or Estimate < 0.5
AMPD3	lobule vs duct	-0.306099	0.430945	0.958249	NS or Estimate < 0.5
APP	lobule vs duct	-0.010882	0.977146	0.99599	NS or Estimate < 0.5
APRT	lobule vs duct	-0.446436	0.339272	0.94863	NS or Estimate < 0.5
AQP2	lobule vs duct	0.0330644	0.938152	0.994781	NS or Estimate < 0.5
ARSA	lobule vs duct	0.200817	0.594328	0.977056	NS or Estimate < 0.5
ATRX	lobule vs duct	-0.231778	0.146975	0.895684	NS or Estimate < 0.5
C1QB	lobule vs duct	-0.305385	0.427118	0.958249	NS or Estimate < 0.5
COL4A5	lobule vs duct	0.0630045	0.866783	0.99056	NS or Estimate < 0.5
F12	lobule vs duct	-0.0695116	0.837295	0.988336	NS or Estimate < 0.5
FUT2	lobule vs duct	0.356052	0.272094	0.941359	NS or Estimate < 0.5
HEXA	lobule vs duct	0.662151	0.0613421	0.849867	NS or Estimate < 0.5
HEXB	lobule vs duct	-0.163733	0.722394	0.980141	NS or Estimate < 0.5
KCNJ11	lobule vs duct	-0.630858	0.347079	0.951599	NS or Estimate < 0.5
KRT14	lobule vs duct	0.331998	0.530951	0.971005	NS or Estimate < 0.5
LDLR	lobule vs duct	0.0415995	0.919542	0.992506	NS or Estimate < 0.5
PMS1	lobule vs duct	-0.530312	0.0979808	0.879448	NS or Estimate < 0.5
TSC2	lobule vs duct	-0.673174	0.0408103	0.828331	P < 0.05
VHL	lobule vs duct	0.0857235	0.81622	0.98763	NS or Estimate < 0.5
VWF	lobule vs duct	0.263822	0.424462	0.958249	NS or Estimate < 0.5
WRN	lobule vs duct	-0.310614	0.541789	0.973342	NS or Estimate < 0.5
DCX	lobule vs duct	-0.750543	0.0244276	0.795693	P < 0.05
FCGR1A	lobule vs duct	-0.418837	0.186398	0.915918	NS or Estimate < 0.5
FCGR3A	lobule vs duct	-0.115627	0.756582	0.983929	NS or Estimate < 0.5
CR1	lobule vs duct	-0.216393	0.593932	0.977044	NS or Estimate < 0.5
CD55	lobule vs duct	0.0103455	0.972637	0.99599	NS or Estimate < 0.5
SLC11A1	lobule vs duct	0.051945	0.877218	0.991584	NS or Estimate < 0.5
GPX1	lobule vs duct	-0.226738	0.600592	0.978398	NS or Estimate < 0.5
C7	lobule vs duct	0.051945	0.885598	0.991584	NS or Estimate < 0.5
CD14	lobule vs duct	-0.28338	0.486161	0.966712	NS or Estimate < 0.5
IGFBP2	lobule vs duct	-0.0687976	0.872846	0.991267	NS or Estimate < 0.5
ORM2	lobule vs duct	0.128549	0.749575	0.983929	NS or Estimate < 0.5
CD59	lobule vs duct	-0.529035	0.18013	0.914522	NS or Estimate < 0.5
HPX	lobule vs duct	0.163056	0.628495	0.978398	NS or Estimate < 0.5
CD4	lobule vs duct	-0.115627	0.641226	0.978398	NS or Estimate < 0.5
SLC11A2	lobule vs duct	-0.357147	0.304731	0.947181	NS or Estimate < 0.5
IGF1	lobule vs duct	-0.480178	0.270151	0.941359	NS or Estimate < 0.5
SERPINA5	lobule vs duct	-0.245619	0.568426	0.977041	NS or Estimate < 0.5
NOS2	lobule vs duct	0.263822	0.603011	0.978398	NS or Estimate < 0.5
IFNAR1	lobule vs duct	0.867484	0.0410857	0.828331	P < 0.05
RFX2	lobule vs duct	-0.131214	0.593311	0.977041	NS or Estimate < 0.5
SOD2	lobule vs duct	0.0559643	0.887327	0.991584	NS or Estimate < 0.5
GSR	lobule vs duct	-0.153388	0.668788	0.97862	NS or Estimate < 0.5
IL13RA2	lobule vs duct	-0.329495	0.485547	0.966712	NS or Estimate < 0.5
TGFB1	lobule vs duct	-0.373619	0.42743	0.958249	NS or Estimate < 0.5
RPL9	lobule vs duct	-0.329432	0.311822	0.947181	NS or Estimate < 0.5
ACY1	lobule vs duct	-0.214401	0.492451	0.968236	NS or Estimate < 0.5
ADH5	lobule vs duct	-0.0263377	0.949209	0.995249	NS or Estimate < 0.5
ADH7	lobule vs duct	-0.346384	0.311079	0.947181	NS or Estimate < 0.5
ADORA2B	lobule vs duct	0.116941	0.730746	0.981102	NS or Estimate < 0.5
ADRA1D	lobule vs duct	-0.373619	0.345759	0.951352	NS or Estimate < 0.5
ADRB1	lobule vs duct	-0.0405983	0.886611	0.991584	NS or Estimate < 0.5
AGTR2	lobule vs duct	-0.216393	0.692608	0.979679	NS or Estimate < 0.5
ALDH2	lobule vs duct	0.00511568	0.985339	0.99599	NS or Estimate < 0.5
ALDH1B1	lobule vs duct	0.106595	0.745625	0.983929	NS or Estimate < 0.5
ALDH1A3	lobule vs duct	0.734968	0.15374	0.895684	NS or Estimate < 0.5
ALDH3B2	lobule vs duct	0.0326093	0.908974	0.991584	NS or Estimate < 0.5
ALDH9A1	lobule vs duct	-0.121457	0.779048	0.984172	NS or Estimate < 0.5
ALOX12	lobule vs duct	0.274881	0.453884	0.960841	NS or Estimate < 0.5
ALOX5	lobule vs duct	0.393813	0.292134	0.947181	NS or Estimate < 0.5
ANXA1	lobule vs duct	0.41116	0.374684	0.956886	NS or Estimate < 0.5
ATP1A1	lobule vs duct	-0.105281	0.787653	0.984172	NS or Estimate < 0.5
ATP4A	lobule vs duct	0.291056	0.404009	0.958249	NS or Estimate < 0.5
AVPR1B	lobule vs duct	0.294659	0.563924	0.977041	NS or Estimate < 0.5
BCKDHA	lobule vs duct	0.0980603	0.773988	0.984172	NS or Estimate < 0.5
BLVRA	lobule vs duct	0.374933	0.294185	0.947181	NS or Estimate < 0.5
TSPO	lobule vs duct	0.152711	0.631947	0.978398	NS or Estimate < 0.5
CACNA2D1	lobule vs duct	0.198826	0.607505	0.978398	NS or Estimate < 0.5
CACNB3	lobule vs duct	0.107937	0.771588	0.984172	NS or Estimate < 0.5
CACNB4	lobule vs duct	0.332619	0.544722	0.975125	NS or Estimate < 0.5
CALCB	lobule vs duct	0.391822	0.436663	0.958249	NS or Estimate < 0.5
CHRM3	lobule vs duct	0.294945	0.594753	0.977056	NS or Estimate < 0.5
CHRNA3	lobule vs duct	-0.245619	0.480354	0.965975	NS or Estimate < 0.5
CHRNB1	lobule vs duct	0.0234628	0.968391	0.99599	NS or Estimate < 0.5
CHRNB4	lobule vs duct	0.0913172	0.830956	0.988336	NS or Estimate < 0.5
CYP2C8	lobule vs duct	0.1696	0.695199	0.979679	NS or Estimate < 0.5
CYP2C18	lobule vs duct	0.662151	0.0616449	0.849867	NS or Estimate < 0.5
CYP2E1	lobule vs duct	-0.291734	0.434324	0.958249	NS or Estimate < 0.5
CYP2F1	lobule vs duct	-0.90194	0.122459	0.888435	NS or Estimate < 0.5
CYP27B1	lobule vs duct	-0.960392	0.0318684	0.824123	P < 0.05
DCK	lobule vs duct	-0.251448	0.494076	0.968564	NS or Estimate < 0.5
DDC	lobule vs duct	-0.178098	0.69025	0.979679	NS or Estimate < 0.5
DIO1	lobule vs duct	0.55104	0.120465	0.888435	NS or Estimate < 0.5
DRD4	lobule vs duct	0.173765	0.488888	0.967128	NS or Estimate < 0.5
DRD5	lobule vs duct	0.244941	0.48433	0.966712	NS or Estimate < 0.5
GABRA1	lobule vs duct	0.328818	0.381537	0.958249	NS or Estimate < 0.5
GABRB1	lobule vs duct	-0.385956	0.269291	0.941359	NS or Estimate < 0.5
GAD1	lobule vs duct	-0.310614	0.3508	0.953059	NS or Estimate < 0.5
GART	lobule vs duct	-0.274845	0.438917	0.958249	NS or Estimate < 0.5
GAS6	lobule vs duct	-0.461791	0.283922	0.947181	NS or Estimate < 0.5
GGCX	lobule vs duct	0.0123735	0.97346	0.99599	NS or Estimate < 0.5
GRIA4	lobule vs duct	0.421048	0.308036	0.947181	NS or Estimate < 0.5
GRIK3	lobule vs duct	0.481528	0.276191	0.945492	NS or Estimate < 0.5
GRIN2A	lobule vs duct	-0.199503	0.582245	0.977041	NS or Estimate < 0.5
GRIN2B	lobule vs duct	-0.324265	0.457202	0.962565	NS or Estimate < 0.5
GRINA	lobule vs duct	-0.134507	0.676266	0.979679	NS or Estimate < 0.5
GRM4	lobule vs duct	0.311928	0.295088	0.947181	NS or Estimate < 0.5
GRM6	lobule vs duct	0.274881	0.506598	0.969783	NS or Estimate < 0.5
GSTA2	lobule vs duct	0.280711	0.500578	0.969783	NS or Estimate < 0.5
GSTM2	lobule vs duct	-0.639432	0.0906752	0.879448	NS or Estimate < 0.5
GSTM3	lobule vs duct	0.16377	0.668203	0.97862	NS or Estimate < 0.5
GSTM4	lobule vs duct	-0.849281	0.0554567	0.847632	NS or Estimate < 0.5
GSTT2	lobule vs duct	-0.151397	0.639014	0.978398	NS or Estimate < 0.5
GUK1	lobule vs duct	-0.614722	0.124689	0.888435	NS or Estimate < 0.5
HMGCR	lobule vs duct	0.431394	0.354319	0.954149	NS or Estimate < 0.5
HRH1	lobule vs duct	-0.335325	0.481548	0.966475	NS or Estimate < 0.5
HSD3B1	lobule vs duct	-0.252162	0.554222	0.975314	NS or Estimate < 0.5
HTR1B	lobule vs duct	0.597155	0.107826	0.885803	NS or Estimate < 0.5
HTR2C	lobule vs duct	-0.245619	0.49844	0.969783	NS or Estimate < 0.5
ICAM2	lobule vs duct	-0.327504	0.397409	0.958249	NS or Estimate < 0.5
IGF1R	lobule vs duct	0.0630045	0.836006	0.988336	NS or Estimate < 0.5
IGF2R	lobule vs duct	-0.105281	0.78444	0.984172	NS or Estimate < 0.5
IL2RB	lobule vs duct	-0.0591661	0.888305	0.991584	NS or Estimate < 0.5
IL7	lobule vs duct	-0.346384	0.351898	0.953091	NS or Estimate < 0.5
IMPDH1	lobule vs duct	-0.449674	0.192513	0.916861	NS or Estimate < 0.5
IMPDH2	lobule vs duct	-0.288495	0.449959	0.958249	NS or Estimate < 0.5
ITGA4	lobule vs duct	-0.0299401	0.938457	0.994781	NS or Estimate < 0.5
ITGAX	lobule vs duct	0.58098	0.0956046	0.879448	NS or Estimate < 0.5
ITGB6	lobule vs duct	-0.233282	0.450776	0.958249	NS or Estimate < 0.5
KLKB1	lobule vs duct	0.500409	0.349934	0.953059	NS or Estimate < 0.5
CYP4F3	lobule vs duct	-0.153388	0.574493	0.977041	NS or Estimate < 0.5
MAOB	lobule vs duct	-0.303792	0.383581	0.958249	NS or Estimate < 0.5
NQO2	lobule vs duct	-0.409389	0.229202	0.929074	NS or Estimate < 0.5
NPY	lobule vs duct	-0.0481066	0.914172	0.991948	NS or Estimate < 0.5
OXT	lobule vs duct	-0.283199	0.488727	0.967095	NS or Estimate < 0.5
OXTR	lobule vs duct	0.236587	0.574418	0.977041	NS or Estimate < 0.5
P4HA1	lobule vs duct	0.254467	0.611809	0.978398	NS or Estimate < 0.5
P4HB	lobule vs duct	-0.10689	0.761177	0.983989	NS or Estimate < 0.5
PAM	lobule vs duct	0.291056	0.503057	0.969783	NS or Estimate < 0.5
PC	lobule vs duct	1.02091	0.0189648	0.775073	P < 0.05
PDE4C	lobule vs duct	-0.375677	0.335158	0.948223	NS or Estimate < 0.5
PDHB	lobule vs duct	0.282702	0.420206	0.958249	NS or Estimate < 0.5
PGR	lobule vs duct	-0.199503	0.673107	0.979679	NS or Estimate < 0.5
ABCB1	lobule vs duct	0.288532	0.488113	0.966712	NS or Estimate < 0.5
PLA2G1B	lobule vs duct	0.074884	0.870072	0.991239	NS or Estimate < 0.5
PLA2G5	lobule vs duct	-0.346384	0.186251	0.915918	NS or Estimate < 0.5
PLAT	lobule vs duct	-0.298278	0.41648	0.958249	NS or Estimate < 0.5
POLR2A	lobule vs duct	-0.235273	0.502584	0.969783	NS or Estimate < 0.5
POLR2B	lobule vs duct	0.374933	0.308775	0.947181	NS or Estimate < 0.5
POR	lobule vs duct	0.464639	0.296406	0.947181	NS or Estimate < 0.5
PPIB	lobule vs duct	0.580266	0.0958487	0.879448	NS or Estimate < 0.5
PPIC	lobule vs duct	0.116941	0.662078	0.97862	NS or Estimate < 0.5
PPP3R1	lobule vs duct	-0.565004	0.197269	0.917019	NS or Estimate < 0.5
PRRG1	lobule vs duct	0.393813	0.334637	0.948223	NS or Estimate < 0.5
PTGDR	lobule vs duct	-0.0233963	0.959408	0.995673	NS or Estimate < 0.5
PTGDS	lobule vs duct	0.0435908	0.919855	0.992684	NS or Estimate < 0.5
PTGER2	lobule vs duct	-0.905245	0.0219654	0.78677	P < 0.05
PTGER3	lobule vs duct	-0.658313	0.0833277	0.879448	NS or Estimate < 0.5
PTGS2	lobule vs duct	-0.549726	0.136625	0.895684	NS or Estimate < 0.5
RARB	lobule vs duct	0.532159	0.198768	0.917019	NS or Estimate < 0.5
RPL4	lobule vs duct	-0.505557	0.200907	0.919071	NS or Estimate < 0.5
RPL5	lobule vs duct	0.0347993	0.890377	0.991584	NS or Estimate < 0.5
RPL6	lobule vs duct	-0.39495	0.255776	0.936148	NS or Estimate < 0.5
RPL7	lobule vs duct	-0.130092	0.652379	0.97862	NS or Estimate < 0.5
RPL7A	lobule vs duct	-0.268984	0.471674	0.964543	NS or Estimate < 0.5
RPL12	lobule vs duct	-0.44481	0.179393	0.914522	NS or Estimate < 0.5
RPL23	lobule vs duct	-0.492335	0.149106	0.895684	NS or Estimate < 0.5
RPL18A	lobule vs duct	-0.325379	0.206437	0.926166	NS or Estimate < 0.5
RPL19	lobule vs duct	-0.409508	0.292287	0.947181	NS or Estimate < 0.5
RPL21	lobule vs duct	-0.307287	0.321823	0.948223	NS or Estimate < 0.5
RPL17	lobule vs duct	-0.235346	0.462317	0.962672	NS or Estimate < 0.5
RPL24	lobule vs duct	-0.0836182	0.664851	0.97862	NS or Estimate < 0.5
RPL26	lobule vs duct	0.142153	0.71061	0.980141	NS or Estimate < 0.5
RPL27	lobule vs duct	0.204305	0.312206	0.947181	NS or Estimate < 0.5
RPL30	lobule vs duct	-0.516397	0.053709	0.847632	NS or Estimate < 0.5
RPL28	lobule vs duct	-0.275107	0.553756	0.975314	NS or Estimate < 0.5
RPL29	lobule vs duct	0.00962934	0.983576	0.99599	NS or Estimate < 0.5
RPL34	lobule vs duct	-0.275901	0.365556	0.956368	NS or Estimate < 0.5
RPL35A	lobule vs duct	-0.449118	0.148622	0.895684	NS or Estimate < 0.5
RPL37	lobule vs duct	-0.229894	0.356569	0.954548	NS or Estimate < 0.5
RPL37A	lobule vs duct	-0.204315	0.479133	0.965222	NS or Estimate < 0.5
RPL39	lobule vs duct	-0.408327	0.161797	0.90165	NS or Estimate < 0.5
RPL36AL	lobule vs duct	-0.267024	0.495411	0.968564	NS or Estimate < 0.5
SLC2A9	lobule vs duct	0.486044	0.198707	0.917019	NS or Estimate < 0.5
CLDN20	lobule vs duct	0.429583	0.11487	0.885803	NS or Estimate < 0.5
CD44	lobule vs duct	-0.424936	0.238807	0.929346	NS or Estimate < 0.5
TSR3	lobule vs duct	0.150719	0.598807	0.978398	NS or Estimate < 0.5
NCCRP1	lobule vs duct	0.211163	0.511293	0.969961	NS or Estimate < 0.5
STX16	lobule vs duct	-0.451666	0.210332	0.929074	NS or Estimate < 0.5
UBE2W	lobule vs duct	0.0227189	0.959718	0.995673	NS or Estimate < 0.5
NDUFV3	lobule vs duct	-0.677193	0.0748132	0.875089	NS or Estimate < 0.5
RORC	lobule vs duct	-0.0695116	0.837363	0.988336	NS or Estimate < 0.5
TM6SF2	lobule vs duct	-0.497067	0.219813	0.929074	NS or Estimate < 0.5
GRB10	lobule vs duct	0.467163	0.282645	0.947181	NS or Estimate < 0.5
GDF6	lobule vs duct	0.16377	0.707167	0.980141	NS or Estimate < 0.5
GGA1	lobule vs duct	0.116941	0.747542	0.983929	NS or Estimate < 0.5
ALKBH2	lobule vs duct	0.894719	0.0248736	0.795693	P < 0.05
OR2Y1	lobule vs duct	0.616036	0.144794	0.895684	NS or Estimate < 0.5
OR2A14	lobule vs duct	-0.402845	0.366696	0.956368	NS or Estimate < 0.5
ETFRF1	lobule vs duct	-0.474385	0.300216	0.947181	NS or Estimate < 0.5
ZNF425	lobule vs duct	-0.392499	0.282443	0.947181	NS or Estimate < 0.5
SPOPL	lobule vs duct	-0.595841	0.115047	0.885803	NS or Estimate < 0.5
ZNF470	lobule vs duct	-0.242691	0.436656	0.958249	NS or Estimate < 0.5
ARHGEF37	lobule vs duct	-0.259983	0.44578	0.958249	NS or Estimate < 0.5
MED11	lobule vs duct	-0.641423	0.150832	0.895684	NS or Estimate < 0.5
C4orf3	lobule vs duct	0.311928	0.376379	0.958035	NS or Estimate < 0.5
ATP1B1	lobule vs duct	-0.199302	0.266097	0.941359	NS or Estimate < 0.5
TOMM5	lobule vs duct	-0.380285	0.253088	0.93397	NS or Estimate < 0.5
DENND6B	lobule vs duct	-0.38144	0.263645	0.941091	NS or Estimate < 0.5
C8orf82	lobule vs duct	-0.264499	0.444468	0.958249	NS or Estimate < 0.5
OR2T27	lobule vs duct	0.55104	0.149358	0.895684	NS or Estimate < 0.5
OR2T35	lobule vs duct	0.13383	0.774853	0.984172	NS or Estimate < 0.5
STX19	lobule vs duct	-0.117618	0.770169	0.984172	NS or Estimate < 0.5
PIM3	lobule vs duct	0.0247103	0.948453	0.995249	NS or Estimate < 0.5
TTC3	lobule vs duct	-0.278864	0.269001	0.941359	NS or Estimate < 0.5
OR4C15	lobule vs duct	0.404159	0.312959	0.947181	NS or Estimate < 0.5
PPARA	lobule vs duct	0.299592	0.432915	0.958249	NS or Estimate < 0.5
AFAP1L2	lobule vs duct	0.0435908	0.889263	0.991584	NS or Estimate < 0.5
ATP5F1A	lobule vs duct	-0.0467927	0.907186	0.991584	NS or Estimate < 0.5
OR4C13	lobule vs duct	0.152711	0.668497	0.97862	NS or Estimate < 0.5
PLEKHA1	lobule vs duct	-0.155912	0.59199	0.977041	NS or Estimate < 0.5
PAMR1	lobule vs duct	-0.585496	0.380796	0.958249	NS or Estimate < 0.5
EXOSC10	lobule vs duct	0.184461	0.654574	0.97862	NS or Estimate < 0.5
RPLP0	lobule vs duct	-0.279374	0.324842	0.948223	NS or Estimate < 0.5
GMPR2	lobule vs duct	0.67904	0.0755585	0.876902	NS or Estimate < 0.5
HCFC1R1	lobule vs duct	0.0168892	0.964274	0.99599	NS or Estimate < 0.5
PFKL	lobule vs duct	-0.0909166	0.808527	0.98763	NS or Estimate < 0.5
ATP5MC1	lobule vs duct	-0.788837	0.0840087	0.879448	NS or Estimate < 0.5
C4B	lobule vs duct	0.419057	0.250574	0.93397	NS or Estimate < 0.5
ECHDC1	lobule vs duct	0.152711	0.751169	0.983929	NS or Estimate < 0.5
ATP5MC2	lobule vs duct	-0.266552	0.350157	0.953059	NS or Estimate < 0.5
DEFB108B	lobule vs duct	-0.511432	0.178166	0.914522	NS or Estimate < 0.5
ASTL	lobule vs duct	-0.216393	0.51433	0.969961	NS or Estimate < 0.5
AFTPH	lobule vs duct	-0.205333	0.564269	0.977041	NS or Estimate < 0.5
SUMO4	lobule vs duct	-0.35673	0.369628	0.956368	NS or Estimate < 0.5
LCLAT1	lobule vs duct	0.421048	0.269198	0.941359	NS or Estimate < 0.5
ATP5MC3	lobule vs duct	-0.344773	0.465817	0.962875	NS or Estimate < 0.5
EPSTI1	lobule vs duct	0.744036	0.0215819	0.78677	P < 0.05
EXOSC3	lobule vs duct	0.081171	0.812784	0.98763	NS or Estimate < 0.5
GATA3	lobule vs duct	-0.0472867	0.906581	0.991584	NS or Estimate < 0.5
SFR1	lobule vs duct	-0.0279121	0.959053	0.995673	NS or Estimate < 0.5
ZNF787	lobule vs duct	0.374933	0.285765	0.947181	NS or Estimate < 0.5
ANXA2	lobule vs duct	0.377808	0.425134	0.958249	NS or Estimate < 0.5
THOC5	lobule vs duct	-0.790829	0.0531201	0.847632	NS or Estimate < 0.5
CBY1	lobule vs duct	-0.144853	0.721841	0.980141	NS or Estimate < 0.5
OR8G1	lobule vs duct	0.123485	0.716313	0.980141	NS or Estimate < 0.5
PTRH1	lobule vs duct	0.486044	0.128095	0.888435	NS or Estimate < 0.5
KCTD11	lobule vs duct	-0.720003	0.0566106	0.847632	NS or Estimate < 0.5
ALKAL2	lobule vs duct	0.217706	0.627256	0.978398	NS or Estimate < 0.5
TWISTNB	lobule vs duct	0.838258	0.0161776	0.775073	P < 0.05
RPLP1	lobule vs duct	-0.467134	0.154059	0.895684	NS or Estimate < 0.5
BICD1	lobule vs duct	-0.0171093	0.967098	0.99599	NS or Estimate < 0.5
SMAD2	lobule vs duct	0.183548	0.607065	0.978398	NS or Estimate < 0.5
LDLRAD4	lobule vs duct	-0.188444	0.665449	0.97862	NS or Estimate < 0.5
HMGXB4	lobule vs duct	-0.105281	0.781444	0.984172	NS or Estimate < 0.5
UQCR10	lobule vs duct	0.149405	0.712253	0.980141	NS or Estimate < 0.5
BRPF1	lobule vs duct	-0.114444	0.820873	0.98763	NS or Estimate < 0.5
ARHGEF35	lobule vs duct	-0.0123368	0.978526	0.99599	NS or Estimate < 0.5
ATP5PF	lobule vs duct	0.23712	0.552354	0.975314	NS or Estimate < 0.5
MTFP1	lobule vs duct	0.217706	0.609276	0.978398	NS or Estimate < 0.5
GLE1	lobule vs duct	0.299592	0.308367	0.947181	NS or Estimate < 0.5
ERLIN2	lobule vs duct	0.13383	0.745423	0.983929	NS or Estimate < 0.5
RBMS3	lobule vs duct	0.51527	0.160337	0.901294	NS or Estimate < 0.5
GTF2IRD2B	lobule vs duct	0.100052	0.764121	0.984139	NS or Estimate < 0.5
SMARCD3	lobule vs duct	0.117655	0.762684	0.983989	NS or Estimate < 0.5
DMAC2L	lobule vs duct	-0.0233963	0.926342	0.994008	NS or Estimate < 0.5
SP5	lobule vs duct	0.0415995	0.895307	0.991584	NS or Estimate < 0.5
MED15	lobule vs duct	-0.354738	0.335492	0.948223	NS or Estimate < 0.5
MANBAL	lobule vs duct	-0.143043	0.763384	0.983989	NS or Estimate < 0.5
TXNDC8	lobule vs duct	-0.159218	0.581772	0.977041	NS or Estimate < 0.5
BMF	lobule vs duct	0.299592	0.363106	0.956264	NS or Estimate < 0.5
RPLP2	lobule vs duct	-0.456267	0.0640221	0.849867	NS or Estimate < 0.5
NOMO3	lobule vs duct	0.299592	0.532759	0.971549	NS or Estimate < 0.5
GRK6	lobule vs duct	-0.428269	0.0968588	0.879448	NS or Estimate < 0.5
OR10AD1	lobule vs duct	0.307413	0.40323	0.958249	NS or Estimate < 0.5
OR52M1	lobule vs duct	-0.537112	0.475601	0.964543	NS or Estimate < 0.5
ZNF740	lobule vs duct	-0.132516	0.74148	0.983929	NS or Estimate < 0.5
RTP2	lobule vs duct	0.0247103	0.941736	0.994921	NS or Estimate < 0.5
TMEM220	lobule vs duct	-0.530312	0.150107	0.895684	NS or Estimate < 0.5
VHLL	lobule vs duct	0.0897061	0.818401	0.98763	NS or Estimate < 0.5
ZNF705A	lobule vs duct	-0.725833	0.0870968	0.879448	NS or Estimate < 0.5
RNASEK	lobule vs duct	0.315767	0.435198	0.958249	NS or Estimate < 0.5
ETV3L	lobule vs duct	0.504925	0.121033	0.888435	NS or Estimate < 0.5
TRIM67	lobule vs duct	-0.0402856	0.910674	0.991695	NS or Estimate < 0.5
SPDYE3	lobule vs duct	-0.618978	0.0852649	0.879448	NS or Estimate < 0.5
METRNL	lobule vs duct	-0.320761	0.374784	0.956886	NS or Estimate < 0.5
LINGO4	lobule vs duct	-0.206047	0.643204	0.978398	NS or Estimate < 0.5
OR1B1	lobule vs duct	0.257278	0.639544	0.978398	NS or Estimate < 0.5
OR1J1	lobule vs duct	0.521814	0.113688	0.885803	NS or Estimate < 0.5
OR1J4	lobule vs duct	-0.310614	0.462621	0.962672	NS or Estimate < 0.5
OR1L8	lobule vs duct	-0.245619	0.45989	0.962565	NS or Estimate < 0.5
OR1N2	lobule vs duct	-0.308623	0.51644	0.969961	NS or Estimate < 0.5
OR10J5	lobule vs duct	0.920143	0.0494137	0.847619	P < 0.05
OR10R2	lobule vs duct	0.0584887	0.873369	0.991267	NS or Estimate < 0.5
OR10T2	lobule vs duct	-0.291734	0.452473	0.959591	NS or Estimate < 0.5
OR13C8	lobule vs duct	0.0247103	0.943746	0.995249	NS or Estimate < 0.5
OR2B11	lobule vs duct	-0.254154	0.485944	0.966712	NS or Estimate < 0.5
OR2M2	lobule vs duct	0.0688342	0.85502	0.99056	NS or Estimate < 0.5
OR2T12	lobule vs duct	0.293048	0.361481	0.954587	NS or Estimate < 0.5
OR4C3	lobule vs duct	0.328818	0.414243	0.958249	NS or Estimate < 0.5
OR4C46	lobule vs duct	-0.394491	0.274573	0.942784	NS or Estimate < 0.5
OR4D2	lobule vs duct	-0.194988	0.658494	0.97862	NS or Estimate < 0.5
OR4D6	lobule vs duct	0.435413	0.293603	0.947181	NS or Estimate < 0.5
OR4D9	lobule vs duct	-0.245619	0.41194	0.958249	NS or Estimate < 0.5
OR4M2	lobule vs duct	0.152711	0.636552	0.978398	NS or Estimate < 0.5
NCK2	lobule vs duct	0.370417	0.356944	0.954548	NS or Estimate < 0.5
OR4N5	lobule vs duct	-0.205333	0.575051	0.977041	NS or Estimate < 0.5
OR5A1	lobule vs duct	-0.438615	0.368077	0.956368	NS or Estimate < 0.5
OR5L1	lobule vs duct	-0.0649958	0.889585	0.991584	NS or Estimate < 0.5
OR5T1	lobule vs duct	-0.281388	0.413608	0.958249	NS or Estimate < 0.5
OR51A2	lobule vs duct	-0.235273	0.489116	0.967128	NS or Estimate < 0.5
OR51D1	lobule vs duct	-0.616155	0.340368	0.949112	NS or Estimate < 0.5
OR51L1	lobule vs duct	-0.170277	0.645879	0.97862	NS or Estimate < 0.5
OR51S1	lobule vs duct	0.374933	0.358892	0.954548	NS or Estimate < 0.5
RPS3	lobule vs duct	-0.310345	0.284163	0.947181	NS or Estimate < 0.5
SFMBT1	lobule vs duct	-0.224214	0.558633	0.976707	NS or Estimate < 0.5
OR52E2	lobule vs duct	-0.983825	0.00181918	0.545349	P < 0.05
OR52E4	lobule vs duct	-0.293725	0.417772	0.958249	NS or Estimate < 0.5
OR52E8	lobule vs duct	0.257278	0.52287	0.969961	NS or Estimate < 0.5
OR52I2	lobule vs duct	0.727147	0.0394315	0.824786	P < 0.05
OR52L1	lobule vs duct	0.580266	0.0722782	0.870337	NS or Estimate < 0.5
OR56A4	lobule vs duct	0.00835417	0.978555	0.99599	NS or Estimate < 0.5
OR7A10	lobule vs duct	-0.310614	0.371171	0.956368	NS or Estimate < 0.5
OR8K3	lobule vs duct	-0.363273	0.27607	0.945492	NS or Estimate < 0.5
OR8J1	lobule vs duct	0.393813	0.309441	0.947181	NS or Estimate < 0.5
TMEM198	lobule vs duct	-0.457495	0.126317	0.888435	NS or Estimate < 0.5
OR9Q1	lobule vs duct	-0.0909166	0.803286	0.987285	NS or Estimate < 0.5
FRG2	lobule vs duct	-0.486721	0.113978	0.885803	NS or Estimate < 0.5
OR9K2	lobule vs duct	-0.53938	0.0945903	0.879448	NS or Estimate < 0.5
OR4C12	lobule vs duct	-0.675202	0.119791	0.888435	NS or Estimate < 0.5
CHD3	lobule vs duct	-0.134507	0.728193	0.981102	NS or Estimate < 0.5
OR6B1	lobule vs duct	0.838258	0.0422114	0.829775	P < 0.05
OR9Q2	lobule vs duct	-0.271043	0.46858	0.964543	NS or Estimate < 0.5
OR9G4	lobule vs duct	-0.0883922	0.806705	0.98763	NS or Estimate < 0.5
SREBF1	lobule vs duct	-0.625067	0.0571288	0.847632	NS or Estimate < 0.5
HNRNPL	lobule vs duct	0.623493	0.245206	0.931251	NS or Estimate < 0.5
RGS10	lobule vs duct	-0.0949359	0.834434	0.988336	NS or Estimate < 0.5
AK4	lobule vs duct	-0.123448	0.711946	0.980141	NS or Estimate < 0.5
KDM2B	lobule vs duct	0.0227189	0.956943	0.99529	NS or Estimate < 0.5
ZNF32	lobule vs duct	-0.378915	0.171276	0.907705	NS or Estimate < 0.5
ACTR2	lobule vs duct	0.215715	0.502294	0.969783	NS or Estimate < 0.5
NFASC	lobule vs duct	-0.918829	0.0996099	0.882045	NS or Estimate < 0.5
SF3A1	lobule vs duct	0.607501	0.17041	0.907705	NS or Estimate < 0.5
MARCHF2	lobule vs duct	-0.134507	0.738038	0.982711	NS or Estimate < 0.5
B4GALT2	lobule vs duct	-0.614722	0.107663	0.885803	NS or Estimate < 0.5
OR10G3	lobule vs duct	-0.245333	0.460732	0.962565	NS or Estimate < 0.5
OR5B3	lobule vs duct	-0.329495	0.338503	0.94863	NS or Estimate < 0.5
OR4B1	lobule vs duct	0.353528	0.294627	0.947181	NS or Estimate < 0.5
NFKBIZ	lobule vs duct	-0.235273	0.644674	0.978398	NS or Estimate < 0.5
OR2A2	lobule vs duct	0.217706	0.565288	0.977041	NS or Estimate < 0.5
OR4K15	lobule vs duct	0.0708255	0.886074	0.991584	NS or Estimate < 0.5
OR5D16	lobule vs duct	-0.421725	0.306255	0.947181	NS or Estimate < 0.5
OR6C75	lobule vs duct	-0.270329	0.568544	0.977041	NS or Estimate < 0.5
OR6C70	lobule vs duct	-0.0233963	0.959142	0.995673	NS or Estimate < 0.5
CPM	lobule vs duct	-0.409389	0.227194	0.929074	NS or Estimate < 0.5
OR4F21	lobule vs duct	-0.241103	0.513851	0.969961	NS or Estimate < 0.5
OR4A47	lobule vs duct	-0.218384	0.60161	0.978398	NS or Estimate < 0.5
OR6C65	lobule vs duct	-0.169563	0.729276	0.981102	NS or Estimate < 0.5
SF3B1	lobule vs duct	-0.4789	0.300732	0.947181	NS or Estimate < 0.5
OR5B2	lobule vs duct	0.775747	0.122714	0.888435	NS or Estimate < 0.5
ITGB4	lobule vs duct	0.0676401	0.86675	0.99056	NS or Estimate < 0.5
CHEK2	lobule vs duct	-0.0299401	0.927349	0.994008	NS or Estimate < 0.5
VPS54	lobule vs duct	3.66441e-05	0.999906	1	NS or Estimate < 0.5
GBA	lobule vs duct	0.217706	0.548007	0.975314	NS or Estimate < 0.5
NUMB	lobule vs duct	0.439929	0.179056	0.914522	NS or Estimate < 0.5
ADAM9	lobule vs duct	0.217706	0.566856	0.977041	NS or Estimate < 0.5
ZNF780B	lobule vs duct	-0.245619	0.486452	0.966712	NS or Estimate < 0.5
ATP8B2	lobule vs duct	0.421048	0.285003	0.947181	NS or Estimate < 0.5
ERBB2	lobule vs duct	0.040389	0.912279	0.991948	NS or Estimate < 0.5
IP6K2	lobule vs duct	-0.0949359	0.770036	0.984172	NS or Estimate < 0.5
ERBB3	lobule vs duct	-0.706952	0.180931	0.915801	NS or Estimate < 0.5
KRTAP5-1	lobule vs duct	-0.235273	0.509424	0.969961	NS or Estimate < 0.5
RPS3A	lobule vs duct	-0.349267	0.258947	0.938385	NS or Estimate < 0.5
YBEY	lobule vs duct	0.429583	0.204568	0.92391	NS or Estimate < 0.5
LRRC37A2	lobule vs duct	-0.0526224	0.89903	0.991584	NS or Estimate < 0.5
TCEAL9	lobule vs duct	0.469155	0.21595	0.929074	NS or Estimate < 0.5
ARHGAP17	lobule vs duct	-0.35673	0.199281	0.917019	NS or Estimate < 0.5
TCEAL1	lobule vs duct	0.616036	0.129145	0.888435	NS or Estimate < 0.5
SLC25A25	lobule vs duct	0.949369	0.0124289	0.745351	P < 0.05
SPIN2B	lobule vs duct	-0.0848682	0.743896	0.983929	NS or Estimate < 0.5
TCEAL4	lobule vs duct	0.350223	0.413643	0.958249	NS or Estimate < 0.5
TCEAL6	lobule vs duct	-0.643948	0.0864366	0.879448	NS or Estimate < 0.5
LRRC18	lobule vs duct	-0.159218	0.679903	0.979679	NS or Estimate < 0.5
ALG3	lobule vs duct	0.767432	0.153649	0.895684	NS or Estimate < 0.5
LRIF1	lobule vs duct	0.561385	0.197138	0.917019	NS or Estimate < 0.5
RPS4X	lobule vs duct	-0.207275	0.465389	0.96284	NS or Estimate < 0.5
ATN1	lobule vs duct	0.450988	0.279875	0.947181	NS or Estimate < 0.5
SDCBP	lobule vs duct	-0.43609	0.312149	0.947181	NS or Estimate < 0.5
KLHL5	lobule vs duct	-0.780483	0.0149094	0.77333	P < 0.05
C8orf48	lobule vs duct	-0.337849	0.338142	0.94863	NS or Estimate < 0.5
NTRK2	lobule vs duct	0.385278	0.296152	0.947181	NS or Estimate < 0.5
SCP2	lobule vs duct	-0.34567	0.326412	0.948223	NS or Estimate < 0.5
ZNF483	lobule vs duct	0.0877148	0.819191	0.98763	NS or Estimate < 0.5
IGIP	lobule vs duct	0.58681	0.162373	0.90165	NS or Estimate < 0.5
IGF2BP2	lobule vs duct	-0.421725	0.218944	0.929074	NS or Estimate < 0.5
SPOP	lobule vs duct	-0.474385	0.191893	0.916861	NS or Estimate < 0.5
BRWD1	lobule vs duct	0.0214417	0.961655	0.995849	NS or Estimate < 0.5
ERV3-1	lobule vs duct	0.0877148	0.820332	0.98763	NS or Estimate < 0.5
SETD4	lobule vs duct	-0.134507	0.755831	0.983929	NS or Estimate < 0.5
GEMIN7	lobule vs duct	0.469155	0.121816	0.888435	NS or Estimate < 0.5
EI24	lobule vs duct	-0.100729	0.81926	0.98763	NS or Estimate < 0.5
RASL10A	lobule vs duct	-0.113816	0.756115	0.983929	NS or Estimate < 0.5
RWDD1	lobule vs duct	-0.159218	0.624062	0.978398	NS or Estimate < 0.5
TULP4	lobule vs duct	0.282702	0.224336	0.929074	NS or Estimate < 0.5
HCST	lobule vs duct	-0.327504	0.462051	0.962672	NS or Estimate < 0.5
TRPM3	lobule vs duct	0.23777	0.50506	0.969783	NS or Estimate < 0.5
LMBRD2	lobule vs duct	-0.698598	0.0658767	0.850795	NS or Estimate < 0.5
SS18	lobule vs duct	0.23496	0.601775	0.978398	NS or Estimate < 0.5
IRGQ	lobule vs duct	-0.0591661	0.87524	0.991429	NS or Estimate < 0.5
TFG	lobule vs duct	0.0227189	0.96181	0.995849	NS or Estimate < 0.5
OPTN	lobule vs duct	-0.38144	0.342142	0.949323	NS or Estimate < 0.5
COA5	lobule vs duct	-0.528321	0.0918785	0.879448	NS or Estimate < 0.5
C18orf25	lobule vs duct	-0.511432	0.32749	0.948223	NS or Estimate < 0.5
TRIM72	lobule vs duct	-0.182614	0.594944	0.977056	NS or Estimate < 0.5
CISD2	lobule vs duct	-0.725833	0.0452996	0.841397	P < 0.05
C4orf46	lobule vs duct	-0.296097	0.223183	0.929074	NS or Estimate < 0.5
EID3	lobule vs duct	0.486044	0.174769	0.911891	NS or Estimate < 0.5
LAMTOR4	lobule vs duct	-0.494448	0.263471	0.941091	NS or Estimate < 0.5
GPX8	lobule vs duct	0.374933	0.316223	0.947181	NS or Estimate < 0.5
ZNF761	lobule vs duct	0.128628	0.744668	0.983929	NS or Estimate < 0.5
STEAP3	lobule vs duct	0.521814	0.173411	0.911428	NS or Estimate < 0.5
SLC41A3	lobule vs duct	-0.0883922	0.817534	0.98763	NS or Estimate < 0.5
KLF6	lobule vs duct	-0.245619	0.46512	0.962672	NS or Estimate < 0.5
SEPTIN2	lobule vs duct	-0.204019	0.536216	0.971549	NS or Estimate < 0.5
TMEM64	lobule vs duct	-0.206047	0.589113	0.977041	NS or Estimate < 0.5
LGMN	lobule vs duct	0.00582971	0.985406	0.99599	NS or Estimate < 0.5
SLC7A2	lobule vs duct	-0.547201	0.213132	0.929074	NS or Estimate < 0.5
MXI1	lobule vs duct	-0.134507	0.733294	0.98111	NS or Estimate < 0.5
KYAT3	lobule vs duct	-0.235273	0.605036	0.978398	NS or Estimate < 0.5
TFIP11	lobule vs duct	0.0688342	0.792712	0.985573	NS or Estimate < 0.5
ADGRL1	lobule vs duct	0.347698	0.456046	0.962317	NS or Estimate < 0.5
RBPMS	lobule vs duct	-0.134507	0.690507	0.979679	NS or Estimate < 0.5
CFAP58	lobule vs duct	-0.44896	0.108225	0.885803	NS or Estimate < 0.5
WDR89	lobule vs duct	0.234596	0.628357	0.978398	NS or Estimate < 0.5
ZNF121	lobule vs duct	0.0136507	0.971252	0.99599	NS or Estimate < 0.5
FNIP1	lobule vs duct	-0.597832	0.112574	0.885803	NS or Estimate < 0.5
SULT1C3	lobule vs duct	-0.00451578	0.990395	0.99599	NS or Estimate < 0.5
TDP1	lobule vs duct	-0.291734	0.458023	0.962565	NS or Estimate < 0.5
RAB19	lobule vs duct	-0.0838764	0.72595	0.980601	NS or Estimate < 0.5
CCT3	lobule vs duct	-0.187166	0.67924	0.979679	NS or Estimate < 0.5
DSP	lobule vs duct	-0.363273	0.34408	0.950542	NS or Estimate < 0.5
NIPA2	lobule vs duct	0.671219	0.195774	0.917019	NS or Estimate < 0.5
TCP1	lobule vs duct	0.256001	0.516371	0.969961	NS or Estimate < 0.5
PPP2CB	lobule vs duct	0.176107	0.618983	0.978398	NS or Estimate < 0.5
SH3D19	lobule vs duct	-0.0402856	0.920948	0.99298	NS or Estimate < 0.5
CDKL4	lobule vs duct	0.293048	0.458687	0.962565	NS or Estimate < 0.5
CLSTN1	lobule vs duct	-0.259983	0.534551	0.971549	NS or Estimate < 0.5
CADPS2	lobule vs duct	-1.03081	0.118244	0.888435	NS or Estimate < 0.5
ARMCX6	lobule vs duct	0.177421	0.602757	0.978398	NS or Estimate < 0.5
SLX4IP	lobule vs duct	0.597155	0.0128899	0.745351	P < 0.05
C20orf202	lobule vs duct	-0.406864	0.414634	0.958249	NS or Estimate < 0.5
SPANXN5	lobule vs duct	0.0350558	0.934373	0.994618	NS or Estimate < 0.5
BRD9	lobule vs duct	-0.0883922	0.818099	0.98763	NS or Estimate < 0.5
KIAA0930	lobule vs duct	0.521814	0.197913	0.917019	NS or Estimate < 0.5
TMEM230	lobule vs duct	0.198826	0.593832	0.977041	NS or Estimate < 0.5
DNASE1L1	lobule vs duct	0.0630045	0.87607	0.991584	NS or Estimate < 0.5
ANKRD16	lobule vs duct	-0.0942219	0.790593	0.984766	NS or Estimate < 0.5
PKD1	lobule vs duct	-0.660837	0.0739442	0.871672	NS or Estimate < 0.5
SSBP3	lobule vs duct	-0.392499	0.36813	0.956368	NS or Estimate < 0.5
SYTL3	lobule vs duct	-0.0299401	0.937453	0.994781	NS or Estimate < 0.5
FAM168B	lobule vs duct	-0.289209	0.339687	0.94863	NS or Estimate < 0.5
C10orf62	lobule vs duct	-0.601138	0.299209	0.947181	NS or Estimate < 0.5
SSBP4	lobule vs duct	0.0827821	0.841193	0.988336	NS or Estimate < 0.5
RPS6	lobule vs duct	-0.348433	0.256085	0.936573	NS or Estimate < 0.5
LRRC38	lobule vs duct	0.0622905	0.902707	0.991584	NS or Estimate < 0.5
ZNF766	lobule vs duct	-0.310614	0.352434	0.953755	NS or Estimate < 0.5
TTC7B	lobule vs duct	0.274881	0.32887	0.948223	NS or Estimate < 0.5
PIK3R6	lobule vs duct	-0.542555	0.140489	0.895684	NS or Estimate < 0.5
SAMD15	lobule vs duct	0.0415995	0.901161	0.991584	NS or Estimate < 0.5
SPIN3	lobule vs duct	-0.274845	0.513986	0.969961	NS or Estimate < 0.5
IBA57	lobule vs duct	-0.0481066	0.893797	0.991584	NS or Estimate < 0.5
TDRD6	lobule vs duct	0.421048	0.299294	0.947181	NS or Estimate < 0.5
TMEM244	lobule vs duct	0.223068	0.686783	0.979679	NS or Estimate < 0.5
ACER2	lobule vs duct	-0.438615	0.276933	0.945512	NS or Estimate < 0.5
PRAMEF6	lobule vs duct	0.0699122	0.903609	0.991584	NS or Estimate < 0.5
MTX3	lobule vs duct	-0.0780467	0.787382	0.984172	NS or Estimate < 0.5
ERCC6L2	lobule vs duct	0.521814	0.193409	0.916861	NS or Estimate < 0.5
SLC6A17	lobule vs duct	-0.239789	0.532682	0.971549	NS or Estimate < 0.5
C6orf58	lobule vs duct	-0.448333	0.436092	0.958249	NS or Estimate < 0.5
MUC21	lobule vs duct	0.697921	0.0972705	0.879448	NS or Estimate < 0.5
GOLGA7B	lobule vs duct	-0.0636819	0.866608	0.99056	NS or Estimate < 0.5
THEMIS	lobule vs duct	-0.37561	0.423077	0.958249	NS or Estimate < 0.5
RAP1A	lobule vs duct	-0.25344	0.461191	0.962672	NS or Estimate < 0.5
LIPJ	lobule vs duct	-0.274845	0.517813	0.969961	NS or Estimate < 0.5
RAP1B	lobule vs duct	-0.117618	0.721315	0.980141	NS or Estimate < 0.5
LDLRAD1	lobule vs duct	0.372942	0.239739	0.929436	NS or Estimate < 0.5
C1orf189	lobule vs duct	-0.0422769	0.912571	0.991948	NS or Estimate < 0.5
MYBPHL	lobule vs duct	-0.655007	0.0246939	0.795693	P < 0.05
HERPUD1	lobule vs duct	-0.146844	0.632252	0.978398	NS or Estimate < 0.5
FYTTD1	lobule vs duct	0.0877148	0.807304	0.98763	NS or Estimate < 0.5
MAGEA10	lobule vs duct	-0.180623	0.64089	0.978398	NS or Estimate < 0.5
MAGEA4	lobule vs duct	-0.331215	0.198929	0.917019	NS or Estimate < 0.5
C1GALT1C1	lobule vs duct	0.344993	0.370538	0.956368	NS or Estimate < 0.5
SLC13A3	lobule vs duct	0.0123735	0.967879	0.99599	NS or Estimate < 0.5
ZMAT1	lobule vs duct	0.809032	0.0152551	0.775073	P < 0.05
MCCD1	lobule vs duct	-0.329495	0.513537	0.969961	NS or Estimate < 0.5
OLA1	lobule vs duct	-0.366178	0.413374	0.958249	NS or Estimate < 0.5
PNLIPRP3	lobule vs duct	-0.228729	0.408361	0.958249	NS or Estimate < 0.5
BTBD1	lobule vs duct	0.13383	0.786859	0.984172	NS or Estimate < 0.5
RPS8	lobule vs duct	-0.0350187	0.913782	0.991948	NS or Estimate < 0.5
MSL1	lobule vs duct	0.0539363	0.902265	0.991584	NS or Estimate < 0.5
PRAMEF8	lobule vs duct	-0.226738	0.526861	0.970361	NS or Estimate < 0.5
ROPN1B	lobule vs duct	0.174116	0.628978	0.978398	NS or Estimate < 0.5
NTRK3	lobule vs duct	-0.264499	0.524374	0.969961	NS or Estimate < 0.5
DNAJC21	lobule vs duct	-0.620551	0.107607	0.885803	NS or Estimate < 0.5
TRIM61	lobule vs duct	-0.0773326	0.842901	0.988336	NS or Estimate < 0.5
MYLK4	lobule vs duct	-0.467841	0.143116	0.895684	NS or Estimate < 0.5
FOXP4	lobule vs duct	0.0415995	0.91357	0.991948	NS or Estimate < 0.5
SEC61G	lobule vs duct	-0.0916306	0.779931	0.984172	NS or Estimate < 0.5
KRTAP5-7	lobule vs duct	0.328818	0.274296	0.942544	NS or Estimate < 0.5
SLC45A2	lobule vs duct	-0.324979	0.416701	0.958249	NS or Estimate < 0.5
GRP	lobule vs duct	-0.679718	0.0480301	0.847619	P < 0.05
ITM2C	lobule vs duct	-0.643948	0.0376551	0.824123	P < 0.05
DCTD	lobule vs duct	-0.245619	0.490962	0.968236	NS or Estimate < 0.5
ABI1	lobule vs duct	-0.409389	0.19341	0.916861	NS or Estimate < 0.5
NHLRC3	lobule vs duct	-0.228729	0.634159	0.978398	NS or Estimate < 0.5
ZNF260	lobule vs duct	0.391822	0.404906	0.958249	NS or Estimate < 0.5
NUDT17	lobule vs duct	-0.310614	0.222496	0.929074	NS or Estimate < 0.5
RGMB	lobule vs duct	-0.501086	0.272271	0.941359	NS or Estimate < 0.5
DDX60L	lobule vs duct	-0.170277	0.70511	0.980141	NS or Estimate < 0.5
SPIN4	lobule vs duct	-0.37561	0.351912	0.953091	NS or Estimate < 0.5
LRRC73	lobule vs duct	-0.271043	0.435654	0.958249	NS or Estimate < 0.5
TCEAL5	lobule vs duct	0.257992	0.576543	0.977041	NS or Estimate < 0.5
KNOP1	lobule vs duct	0.13383	0.758622	0.983929	NS or Estimate < 0.5
C9orf152	lobule vs duct	-0.53938	0.17511	0.911891	NS or Estimate < 0.5
RPS9	lobule vs duct	-0.16052	0.509333	0.969961	NS or Estimate < 0.5
CXorf66	lobule vs duct	-0.903931	0.0411627	0.828331	P < 0.05
MPST	lobule vs duct	-0.950996	0.0136639	0.752292	P < 0.05
SEH1L	lobule vs duct	-0.587487	0.0364885	0.824123	P < 0.05
LURAP1	lobule vs duct	0.246932	0.574216	0.977041	NS or Estimate < 0.5
ZC2HC1B	lobule vs duct	0.198826	0.498572	0.969783	NS or Estimate < 0.5
CFAP126	lobule vs duct	-0.486721	0.251575	0.93397	NS or Estimate < 0.5
CCDC184	lobule vs duct	0.217706	0.638934	0.978398	NS or Estimate < 0.5
PRR25	lobule vs duct	-0.216393	0.439331	0.958249	NS or Estimate < 0.5
PRR23B	lobule vs duct	0.450274	0.219603	0.929074	NS or Estimate < 0.5
ZNF793	lobule vs duct	0.152711	0.617107	0.978398	NS or Estimate < 0.5
VSIG8	lobule vs duct	-0.0987377	0.79712	0.98566	NS or Estimate < 0.5
PTRHD1	lobule vs duct	-0.367075	0.307451	0.947181	NS or Estimate < 0.5
C17orf97	lobule vs duct	-0.43609	0.317874	0.947181	NS or Estimate < 0.5
FIGNL2	lobule vs duct	0.374933	0.217368	0.929074	NS or Estimate < 0.5
EIF2AK4	lobule vs duct	0.282702	0.468211	0.964543	NS or Estimate < 0.5
PLIN5	lobule vs duct	0.608631	0.237348	0.929074	NS or Estimate < 0.5
PTCHD4	lobule vs duct	-0.245619	0.518747	0.969961	NS or Estimate < 0.5
RFPL4B	lobule vs duct	0.0851903	0.818088	0.98763	NS or Estimate < 0.5
MAD1L1	lobule vs duct	0.469155	0.154381	0.895684	NS or Estimate < 0.5
STAP2	lobule vs duct	0.0143648	0.97284	0.99599	NS or Estimate < 0.5
SLTM	lobule vs duct	-0.105281	0.78599	0.984172	NS or Estimate < 0.5
EXOC6	lobule vs duct	-0.352214	0.247714	0.932218	NS or Estimate < 0.5
RPS10	lobule vs duct	-0.215416	0.718421	0.980141	NS or Estimate < 0.5
ANXA2R	lobule vs duct	-0.503611	0.167554	0.903491	NS or Estimate < 0.5
DCUN1D2	lobule vs duct	-0.0695116	0.863437	0.99056	NS or Estimate < 0.5
FLG2	lobule vs duct	-0.727824	0.0382425	0.824123	P < 0.05
AKT1	lobule vs duct	-0.248924	0.592799	0.977041	NS or Estimate < 0.5
CUTA	lobule vs duct	-0.514505	0.240491	0.93096	NS or Estimate < 0.5
ODF3B	lobule vs duct	0.051945	0.889655	0.991584	NS or Estimate < 0.5
DDX19B	lobule vs duct	-0.688384	0.130319	0.889875	NS or Estimate < 0.5
ETFB	lobule vs duct	-0.438615	0.260932	0.941091	NS or Estimate < 0.5
FBXO44	lobule vs duct	0.192282	0.652306	0.97862	NS or Estimate < 0.5
KCNMA1	lobule vs duct	-0.0818484	0.837804	0.988336	NS or Estimate < 0.5
ME3	lobule vs duct	0.198826	0.586275	0.977041	NS or Estimate < 0.5
TM9SF1	lobule vs duct	0.123485	0.521008	0.969961	NS or Estimate < 0.5
CFH	lobule vs duct	0.203342	0.662423	0.97862	NS or Estimate < 0.5
LAT	lobule vs duct	-0.218384	0.627772	0.978398	NS or Estimate < 0.5
CKMT1A	lobule vs duct	-0.0130508	0.976101	0.99599	NS or Estimate < 0.5
LLGL2	lobule vs duct	0.0688342	0.868483	0.991103	NS or Estimate < 0.5
ALG1L	lobule vs duct	-0.438615	0.271224	0.941359	NS or Estimate < 0.5
MPG	lobule vs duct	-1.11559	0.0260014	0.812063	P < 0.05
RTKN	lobule vs duct	-0.239789	0.518868	0.969961	NS or Estimate < 0.5
DNAJC25	lobule vs duct	0.181937	0.684578	0.979679	NS or Estimate < 0.5
RPS12	lobule vs duct	-0.237971	0.447078	0.958249	NS or Estimate < 0.5
RPS13	lobule vs duct	-0.176969	0.621259	0.978398	NS or Estimate < 0.5
KHDC3L	lobule vs duct	0.19431	0.704423	0.980141	NS or Estimate < 0.5
MSMO1	lobule vs duct	0.152711	0.641513	0.978398	NS or Estimate < 0.5
SUGP2	lobule vs duct	-0.211877	0.508812	0.969961	NS or Estimate < 0.5
TRIM36	lobule vs duct	0.0201945	0.971115	0.99599	NS or Estimate < 0.5
MAEA	lobule vs duct	0.393813	0.312618	0.947181	NS or Estimate < 0.5
S100PBP	lobule vs duct	-0.00522981	0.988575	0.99599	NS or Estimate < 0.5
GOPC	lobule vs duct	-0.302793	0.416227	0.958249	NS or Estimate < 0.5
ALDH18A1	lobule vs duct	-0.658313	0.0451475	0.841397	P < 0.05
BTBD11	lobule vs duct	0.0227189	0.960042	0.995673	NS or Estimate < 0.5
ARHGAP8	lobule vs duct	-0.996162	0.00123538	0.526629	P < 0.05
RCCD1	lobule vs duct	-0.245619	0.396882	0.958249	NS or Estimate < 0.5
DAPL1	lobule vs duct	0.116941	0.771788	0.984172	NS or Estimate < 0.5
VMAC	lobule vs duct	0.07335	0.877231	0.991584	NS or Estimate < 0.5
ERMAP	lobule vs duct	0.331342	0.397431	0.958249	NS or Estimate < 0.5
C14orf28	lobule vs duct	-0.245619	0.478637	0.964917	NS or Estimate < 0.5
OS9	lobule vs duct	-0.0818484	0.822093	0.987647	NS or Estimate < 0.5
HSP90AA1	lobule vs duct	-0.0960154	0.865416	0.99056	NS or Estimate < 0.5
KIAA2026	lobule vs duct	0.591325	0.0914998	0.879448	NS or Estimate < 0.5
TMEM30B	lobule vs duct	0.0227189	0.961629	0.995849	NS or Estimate < 0.5
ATP6AP1L	lobule vs duct	0.862968	0.0110812	0.738525	P < 0.05
RAB28	lobule vs duct	-0.354205	0.363672	0.956266	NS or Estimate < 0.5
RNF215	lobule vs duct	0.226775	0.653601	0.97862	NS or Estimate < 0.5
SH3PXD2B	lobule vs duct	0.328818	0.458689	0.962565	NS or Estimate < 0.5
GNG10	lobule vs duct	-0.0208719	0.942107	0.9952	NS or Estimate < 0.5
RPS15	lobule vs duct	-0.425513	0.232775	0.929074	NS or Estimate < 0.5
SORBS3	lobule vs duct	0.128	0.780126	0.984172	NS or Estimate < 0.5
SH3BP5	lobule vs duct	-0.675202	0.0871832	0.879448	NS or Estimate < 0.5
MUC1	lobule vs duct	0.602985	0.265251	0.941359	NS or Estimate < 0.5
MTCP1	lobule vs duct	-0.557547	0.0774631	0.87822	NS or Estimate < 0.5
EPM2A	lobule vs duct	-0.48473	0.186708	0.915918	NS or Estimate < 0.5
DKK3	lobule vs duct	0.267127	0.589633	0.977041	NS or Estimate < 0.5
SERBP1	lobule vs duct	-0.318435	0.396499	0.958249	NS or Estimate < 0.5
NR3C1	lobule vs duct	-0.199503	0.573645	0.977041	NS or Estimate < 0.5
FPGS	lobule vs duct	-0.0798571	0.820913	0.98763	NS or Estimate < 0.5
SLC26A10	lobule vs duct	0.104604	0.781939	0.984172	NS or Estimate < 0.5
VPS13C	lobule vs duct	0.223536	0.549416	0.975314	NS or Estimate < 0.5
ICE2	lobule vs duct	0.00582971	0.98734	0.99599	NS or Estimate < 0.5
CAVIN4	lobule vs duct	-0.0402856	0.919465	0.992506	NS or Estimate < 0.5
RPS16	lobule vs duct	-0.662322	0.0614778	0.849867	NS or Estimate < 0.5
PUM1	lobule vs duct	-0.948055	0.0508848	0.847632	NS or Estimate < 0.5
MYADM	lobule vs duct	0.374933	0.319803	0.947181	NS or Estimate < 0.5
RPS17	lobule vs duct	-0.253853	0.307001	0.947181	NS or Estimate < 0.5
RPS19	lobule vs duct	-0.386782	0.146881	0.895684	NS or Estimate < 0.5
ZNF749	lobule vs duct	0.116941	0.721288	0.980141	NS or Estimate < 0.5
GOLGA8A	lobule vs duct	-0.321674	0.431041	0.958249	NS or Estimate < 0.5
IQCB1	lobule vs duct	-0.262508	0.583816	0.977041	NS or Estimate < 0.5
RPS21	lobule vs duct	-0.196835	0.39088	0.958249	NS or Estimate < 0.5
S100A13	lobule vs duct	-0.606901	0.132853	0.894549	NS or Estimate < 0.5
FBLIM1	lobule vs duct	1.14688	0.00014308	0.42143	P < 0.05
ARF1	lobule vs duct	-0.105567	0.792461	0.985573	NS or Estimate < 0.5
TM2D2	lobule vs duct	0.404159	0.373157	0.956886	NS or Estimate < 0.5
RTL5	lobule vs duct	-0.182614	0.505674	0.969783	NS or Estimate < 0.5
MSS51	lobule vs duct	-0.341868	0.363698	0.956266	NS or Estimate < 0.5
LRRC24	lobule vs duct	-0.183928	0.565003	0.977041	NS or Estimate < 0.5
FBXO48	lobule vs duct	-0.303534	0.596641	0.977368	NS or Estimate < 0.5
ZNF688	lobule vs duct	0.874028	0.0428219	0.829775	P < 0.05
CD276	lobule vs duct	0.299592	0.486528	0.966712	NS or Estimate < 0.5
SLC6A9	lobule vs duct	-0.199503	0.614594	0.978398	NS or Estimate < 0.5
TGFBR2	lobule vs duct	-0.543896	0.152712	0.895684	NS or Estimate < 0.5
EXOC1	lobule vs duct	0.0877148	0.779692	0.984172	NS or Estimate < 0.5
MINK1	lobule vs duct	-0.363273	0.243233	0.931251	NS or Estimate < 0.5
TRIM17	lobule vs duct	-0.734071	0.0737337	0.871672	NS or Estimate < 0.5
YIPF5	lobule vs duct	-0.665353	0.0852011	0.879448	NS or Estimate < 0.5
FNBP1L	lobule vs duct	-0.256745	0.509796	0.969961	NS or Estimate < 0.5
SC5D	lobule vs duct	-0.905245	0.183932	0.915918	NS or Estimate < 0.5
RPS14	lobule vs duct	-0.558385	0.0933574	0.879448	NS or Estimate < 0.5
AFF3	lobule vs duct	0.0773693	0.819167	0.98763	NS or Estimate < 0.5
CD34	lobule vs duct	-0.0670642	0.865892	0.99056	NS or Estimate < 0.5
CHN1	lobule vs duct	-0.245619	0.452701	0.959655	NS or Estimate < 0.5
U2AF1	lobule vs duct	-0.604376	0.115288	0.885803	NS or Estimate < 0.5
DUT	lobule vs duct	0.209885	0.609363	0.978398	NS or Estimate < 0.5
CXorf65	lobule vs duct	0.58681	0.0623132	0.849867	NS or Estimate < 0.5
DPPA5	lobule vs duct	0.0955358	0.815082	0.98763	NS or Estimate < 0.5
RAB12	lobule vs duct	-0.588572	0.387875	0.958249	NS or Estimate < 0.5
AARD	lobule vs duct	0.198826	0.613996	0.978398	NS or Estimate < 0.5
VEGFA	lobule vs duct	-0.262508	0.480709	0.966475	NS or Estimate < 0.5
SPAG16	lobule vs duct	-0.0838764	0.798902	0.985919	NS or Estimate < 0.5
RPS24	lobule vs duct	-0.744359	0.14128	0.895684	NS or Estimate < 0.5
RPS25	lobule vs duct	-0.0481865	0.907487	0.991584	NS or Estimate < 0.5
RPS26	lobule vs duct	-0.13944	0.749423	0.983929	NS or Estimate < 0.5
CCM2	lobule vs duct	-0.327504	0.458398	0.962565	NS or Estimate < 0.5
TCAIM	lobule vs duct	-0.428269	0.182618	0.915918	NS or Estimate < 0.5
KCTD21	lobule vs duct	0.0415995	0.893932	0.991584	NS or Estimate < 0.5
KIAA1755	lobule vs duct	0.0688342	0.807256	0.98763	NS or Estimate < 0.5
RGS7BP	lobule vs duct	-0.396301	0.3975	0.958249	NS or Estimate < 0.5
SFMBT2	lobule vs duct	0.0980603	0.784522	0.984172	NS or Estimate < 0.5
CPTP	lobule vs duct	-0.306477	0.0650672	0.850795	NS or Estimate < 0.5
ZNF16	lobule vs duct	-0.779769	0.0159741	0.775073	P < 0.05
METTL17	lobule vs duct	-0.432285	0.52589	0.970336	NS or Estimate < 0.5
RPS27	lobule vs duct	-0.685745	0.0606279	0.849867	NS or Estimate < 0.5
AP2B1	lobule vs duct	0.263822	0.483126	0.966712	NS or Estimate < 0.5
AP1G1	lobule vs duct	-0.755059	0.202278	0.922212	NS or Estimate < 0.5
ARHGAP5	lobule vs duct	0.116941	0.76699	0.984172	NS or Estimate < 0.5
PLPP4	lobule vs duct	-0.971154	0.0212092	0.78596	P < 0.05
SAMD5	lobule vs duct	0.120179	0.769965	0.984172	NS or Estimate < 0.5
RPS28	lobule vs duct	-0.706562	0.121453	0.888435	NS or Estimate < 0.5
SPDYE2	lobule vs duct	-0.252162	0.5985	0.97829	NS or Estimate < 0.5
ZNF816	lobule vs duct	-0.207324	0.655854	0.97862	NS or Estimate < 0.5
CYB5RL	lobule vs duct	-0.482206	0.080052	0.879448	NS or Estimate < 0.5
IFIT3	lobule vs duct	0.152711	0.667044	0.97862	NS or Estimate < 0.5
SRSF7	lobule vs duct	-0.327504	0.27315	0.941359	NS or Estimate < 0.5
TP53BP2	lobule vs duct	0.651091	0.117404	0.888435	NS or Estimate < 0.5
PLAA	lobule vs duct	-0.346384	0.531017	0.971005	NS or Estimate < 0.5
SCMH1	lobule vs duct	-0.0481066	0.924058	0.99376	NS or Estimate < 0.5
PLD3	lobule vs duct	0.0877148	0.827567	0.988336	NS or Estimate < 0.5
GASK1B	lobule vs duct	-0.385956	0.341933	0.949323	NS or Estimate < 0.5
CT55	lobule vs duct	0.504925	0.135222	0.895684	NS or Estimate < 0.5
RNLS	lobule vs duct	0.00582971	0.98582	0.99599	NS or Estimate < 0.5
ERGIC1	lobule vs duct	-0.262508	0.506774	0.969783	NS or Estimate < 0.5
TRMT11	lobule vs duct	0.331342	0.433152	0.958249	NS or Estimate < 0.5
MCUR1	lobule vs duct	-0.438615	0.278909	0.947181	NS or Estimate < 0.5
DHRS12	lobule vs duct	0.299592	0.501068	0.969783	NS or Estimate < 0.5
DNAJB14	lobule vs duct	-0.950046	0.0188266	0.775073	P < 0.05
DDX59	lobule vs duct	-0.134507	0.753313	0.983929	NS or Estimate < 0.5
CFAP206	lobule vs duct	0.358044	0.399549	0.958249	NS or Estimate < 0.5
ALDH3A2	lobule vs duct	0.119882	0.771659	0.984172	NS or Estimate < 0.5
CSNK1G3	lobule vs duct	-0.0065071	0.986815	0.99599	NS or Estimate < 0.5
RPS29	lobule vs duct	-0.394332	0.0839921	0.879448	NS or Estimate < 0.5
RCE1	lobule vs duct	0.567929	0.132523	0.894373	NS or Estimate < 0.5
TMPO	lobule vs duct	0.263822	0.493516	0.968564	NS or Estimate < 0.5
PSRC1	lobule vs duct	-0.421725	0.372609	0.956435	NS or Estimate < 0.5
STK24	lobule vs duct	0.18848	0.639558	0.978398	NS or Estimate < 0.5
SPINT1	lobule vs duct	-0.181337	0.686412	0.979679	NS or Estimate < 0.5
LCMT1	lobule vs duct	0.510754	0.0374909	0.824123	P < 0.05
HNRNPH2	lobule vs duct	-0.143043	0.73011	0.981102	NS or Estimate < 0.5
OAS1	lobule vs duct	-0.153388	0.613625	0.978398	NS or Estimate < 0.5
USP16	lobule vs duct	-0.530312	0.19079	0.916644	NS or Estimate < 0.5
RRM1	lobule vs duct	0.456818	0.152728	0.895684	NS or Estimate < 0.5
FBXO7	lobule vs duct	-0.522491	0.080548	0.879448	NS or Estimate < 0.5
EXTL2	lobule vs duct	0.328818	0.449543	0.958249	NS or Estimate < 0.5
GLUL	lobule vs duct	0.126723	0.768628	0.984172	NS or Estimate < 0.5
NGRN	lobule vs duct	0.939023	0.00760331	0.700719	P < 0.05
SRGAP3	lobule vs duct	-0.174793	0.642932	0.978398	NS or Estimate < 0.5
SAR1B	lobule vs duct	-0.270329	0.592308	0.977041	NS or Estimate < 0.5
TMEM98	lobule vs duct	-0.513956	0.219537	0.929074	NS or Estimate < 0.5
CSTF3	lobule vs duct	0.533237	0.2924	0.947181	NS or Estimate < 0.5
CSTF1	lobule vs duct	-0.690063	0.00930928	0.72429	P < 0.05
PPM1B	lobule vs duct	-0.511432	0.150473	0.895684	NS or Estimate < 0.5
DNAAF4	lobule vs duct	-0.124162	0.737459	0.982577	NS or Estimate < 0.5
PHF12	lobule vs duct	-0.0123368	0.972086	0.99599	NS or Estimate < 0.5
AMZ2	lobule vs duct	-0.306813	0.459584	0.962565	NS or Estimate < 0.5
RARA	lobule vs duct	-0.262508	0.434842	0.958249	NS or Estimate < 0.5
TRPT1	lobule vs duct	0.263822	0.465495	0.962867	NS or Estimate < 0.5
ZNF404	lobule vs duct	0.104604	0.701185	0.980141	NS or Estimate < 0.5
DCLRE1C	lobule vs duct	-0.38166	0.33724	0.94863	NS or Estimate < 0.5
TRAF5	lobule vs duct	-0.419734	0.282635	0.947181	NS or Estimate < 0.5
DMAP1	lobule vs duct	0.510754	0.186184	0.915918	NS or Estimate < 0.5
ERP29	lobule vs duct	-0.346384	0.451441	0.958508	NS or Estimate < 0.5
EXOSC9	lobule vs duct	-0.0233963	0.958431	0.995673	NS or Estimate < 0.5
NHP2	lobule vs duct	0.143262	0.747392	0.983929	NS or Estimate < 0.5
KCNIP1	lobule vs duct	0.291056	0.298326	0.947181	NS or Estimate < 0.5
ITPRIPL2	lobule vs duct	0.0630045	0.889787	0.991584	NS or Estimate < 0.5
KCNIP3	lobule vs duct	-0.0669872	0.855125	0.99056	NS or Estimate < 0.5
SORBS1	lobule vs duct	-0.698598	0.057453	0.847632	NS or Estimate < 0.5
C18orf32	lobule vs duct	0.486044	0.107313	0.885803	NS or Estimate < 0.5
RGL3	lobule vs duct	0.480214	0.242348	0.931251	NS or Estimate < 0.5
UFD1	lobule vs duct	0.0379971	0.936289	0.994781	NS or Estimate < 0.5
FAM102A	lobule vs duct	0.200817	0.55211	0.975314	NS or Estimate < 0.5
RPL38	lobule vs duct	-0.352164	0.285543	0.947181	NS or Estimate < 0.5
RYR3	lobule vs duct	0.385278	0.389841	0.958249	NS or Estimate < 0.5
EXOC4	lobule vs duct	-0.124162	0.743385	0.983929	NS or Estimate < 0.5
CYS1	lobule vs duct	-0.820108	0.0610904	0.849867	NS or Estimate < 0.5
FAM220A	lobule vs duct	-0.346384	0.450458	0.958249	NS or Estimate < 0.5
ARL4A	lobule vs duct	0.439929	0.372154	0.956368	NS or Estimate < 0.5
FOXK1	lobule vs duct	-0.281388	0.491253	0.968236	NS or Estimate < 0.5
ARL5A	lobule vs duct	0.779806	0.0364777	0.824123	P < 0.05
ZNF829	lobule vs duct	0.309937	0.41828	0.958249	NS or Estimate < 0.5
GGPS1	lobule vs duct	0.232071	0.575399	0.977041	NS or Estimate < 0.5
EIF3B	lobule vs duct	-0.153388	0.702417	0.980141	NS or Estimate < 0.5
CMTM5	lobule vs duct	-0.228729	0.584509	0.977041	NS or Estimate < 0.5
TRIM16L	lobule vs duct	-0.233282	0.506324	0.969783	NS or Estimate < 0.5
PDE4B	lobule vs duct	0.00582971	0.986733	0.99599	NS or Estimate < 0.5
CDKL5	lobule vs duct	-0.365265	0.569309	0.977041	NS or Estimate < 0.5
AGPAT3	lobule vs duct	-0.298278	0.446054	0.958249	NS or Estimate < 0.5
SIL1	lobule vs duct	0.268337	0.489497	0.967128	NS or Estimate < 0.5
BTF3	lobule vs duct	0.157903	0.608576	0.978398	NS or Estimate < 0.5
PARL	lobule vs duct	-0.89088	0.0348354	0.824123	P < 0.05
EEF1B2	lobule vs duct	-0.287252	0.525147	0.969961	NS or Estimate < 0.5
DEFB116	lobule vs duct	-0.115627	0.806381	0.98763	NS or Estimate < 0.5
DEFB128	lobule vs duct	0.00582971	0.988539	0.99599	NS or Estimate < 0.5
ZNF284	lobule vs duct	0.152711	0.709136	0.980141	NS or Estimate < 0.5
SLC38A10	lobule vs duct	0.244941	0.55873	0.976707	NS or Estimate < 0.5
SCNN1A	lobule vs duct	-0.612197	0.129158	0.888435	NS or Estimate < 0.5
MARVELD2	lobule vs duct	0.200817	0.644244	0.978398	NS or Estimate < 0.5
GOLGA6A	lobule vs duct	-0.0715029	0.864217	0.99056	NS or Estimate < 0.5
CDC42SE2	lobule vs duct	-0.0951353	0.759355	0.983929	NS or Estimate < 0.5
CDC42SE1	lobule vs duct	-0.504325	0.192956	0.916861	NS or Estimate < 0.5
PRPS2	lobule vs duct	-0.291734	0.55022	0.975314	NS or Estimate < 0.5
ZNF718	lobule vs duct	0.922134	0.0161551	0.775073	P < 0.05
RGS21	lobule vs duct	-0.551717	0.164248	0.90165	NS or Estimate < 0.5
MRGPRE	lobule vs duct	0.276159	0.470677	0.964543	NS or Estimate < 0.5
BOLA2B	lobule vs duct	0.253476	0.446973	0.958249	NS or Estimate < 0.5
ALG13	lobule vs duct	-0.450952	0.195553	0.917019	NS or Estimate < 0.5
ATAD3C	lobule vs duct	0.421048	0.261816	0.941091	NS or Estimate < 0.5
CEACAM16	lobule vs duct	-0.134507	0.736532	0.98232	NS or Estimate < 0.5
SLC25A29	lobule vs duct	0.167989	0.596497	0.977368	NS or Estimate < 0.5
ZBTB7C	lobule vs duct	0.309937	0.471875	0.964543	NS or Estimate < 0.5
ATP6V1E1	lobule vs duct	0.410703	0.311702	0.947181	NS or Estimate < 0.5
SPATA6L	lobule vs duct	0.106595	0.792596	0.985573	NS or Estimate < 0.5
SRSF5	lobule vs duct	0.127044	0.768579	0.984172	NS or Estimate < 0.5
THEMIS2	lobule vs duct	-0.834419	0.0106294	0.738525	P < 0.05
AREL1	lobule vs duct	-0.134507	0.610564	0.978398	NS or Estimate < 0.5
ETNK1	lobule vs duct	-0.385956	0.392604	0.958249	NS or Estimate < 0.5
FHL2	lobule vs duct	-0.105281	0.747026	0.983929	NS or Estimate < 0.5
PRSS53	lobule vs duct	-0.327504	0.423151	0.958249	NS or Estimate < 0.5
GK5	lobule vs duct	-0.0402856	0.907772	0.991584	NS or Estimate < 0.5
SEC14L1	lobule vs duct	-0.264499	0.520937	0.969961	NS or Estimate < 0.5
CCNL2	lobule vs duct	-0.718793	0.0136427	0.752292	P < 0.05
MAP9	lobule vs duct	0.0663098	0.841356	0.988336	NS or Estimate < 0.5
USP9X	lobule vs duct	-0.0591661	0.871685	0.991267	NS or Estimate < 0.5
SPAG8	lobule vs duct	0.96825	0.0144355	0.760711	P < 0.05
IAH1	lobule vs duct	-0.281388	0.44766	0.958249	NS or Estimate < 0.5
ZMYM5	lobule vs duct	-0.446436	0.206452	0.926166	NS or Estimate < 0.5
SAPCD1	lobule vs duct	0.55104	0.225132	0.929074	NS or Estimate < 0.5
IL18BP	lobule vs duct	-0.134507	0.599646	0.978398	NS or Estimate < 0.5
TYW5	lobule vs duct	0.257278	0.31063	0.947181	NS or Estimate < 0.5
SNAPC3	lobule vs duct	0.111148	0.750723	0.983929	NS or Estimate < 0.5
ENTR1	lobule vs duct	0.163056	0.667731	0.97862	NS or Estimate < 0.5
DEDD	lobule vs duct	-0.170277	0.660249	0.97862	NS or Estimate < 0.5
ABHD18	lobule vs duct	-0.671495	0.144914	0.895684	NS or Estimate < 0.5
CCNI2	lobule vs duct	0.0688342	0.79722	0.98566	NS or Estimate < 0.5
CDC42	lobule vs duct	-0.538263	0.224677	0.929074	NS or Estimate < 0.5
CHIC1	lobule vs duct	0.504925	0.235425	0.929074	NS or Estimate < 0.5
IZUMO4	lobule vs duct	-0.293725	0.461744	0.962672	NS or Estimate < 0.5
GPX4	lobule vs duct	0.135171	0.553441	0.975314	NS or Estimate < 0.5
STRN4	lobule vs duct	0.328818	0.430958	0.958249	NS or Estimate < 0.5
FKRP	lobule vs duct	-0.00451578	0.989313	0.99599	NS or Estimate < 0.5
ZNF384	lobule vs duct	-1.13929	0.195018	0.916861	NS or Estimate < 0.5
MESP2	lobule vs duct	-0.0636819	0.886012	0.991584	NS or Estimate < 0.5
MEOX1	lobule vs duct	-0.115627	0.751297	0.983929	NS or Estimate < 0.5
TCERG1	lobule vs duct	0.253476	0.409373	0.958249	NS or Estimate < 0.5
SWI5	lobule vs duct	-0.178098	0.527456	0.970609	NS or Estimate < 0.5
FAM3C	lobule vs duct	-0.213459	0.442634	0.958249	NS or Estimate < 0.5
ARL16	lobule vs duct	0.282702	0.472458	0.964543	NS or Estimate < 0.5
C8orf74	lobule vs duct	-0.222442	0.608108	0.978398	NS or Estimate < 0.5
MAPK3	lobule vs duct	0.744036	0.0159909	0.775073	P < 0.05
FAM133B	lobule vs duct	0.0143648	0.973154	0.99599	NS or Estimate < 0.5
MUC17	lobule vs duct	0.43086	0.3213	0.948223	NS or Estimate < 0.5
NRF1	lobule vs duct	0.142365	0.730032	0.981102	NS or Estimate < 0.5
MYH11	lobule vs duct	-0.269052	0.603962	0.978398	NS or Estimate < 0.5
ARAP1	lobule vs duct	-0.127964	0.777783	0.984172	NS or Estimate < 0.5
PALM	lobule vs duct	0.0186605	0.973117	0.99599	NS or Estimate < 0.5
ACTR3B	lobule vs duct	-0.40032	0.369449	0.956368	NS or Estimate < 0.5
CHTF8	lobule vs duct	0.486044	0.127525	0.888435	NS or Estimate < 0.5
SERPINB7	lobule vs duct	-0.00451578	0.991037	0.99599	NS or Estimate < 0.5
PEG10	lobule vs duct	0.374933	0.33824	0.94863	NS or Estimate < 0.5
HTR4	lobule vs duct	0.345707	0.215952	0.929074	NS or Estimate < 0.5
AKR1E2	lobule vs duct	-0.58136	0.0355169	0.824123	P < 0.05
CLDND1	lobule vs duct	0.339163	0.470335	0.964543	NS or Estimate < 0.5
ZNF765	lobule vs duct	-0.127964	0.711699	0.980141	NS or Estimate < 0.5
TYSND1	lobule vs duct	0.260219	0.591474	0.977041	NS or Estimate < 0.5
PRDM15	lobule vs duct	-0.0591661	0.842396	0.988336	NS or Estimate < 0.5
U2AF1L4	lobule vs duct	-0.0695116	0.808619	0.98763	NS or Estimate < 0.5
COA3	lobule vs duct	-0.0233963	0.957833	0.995457	NS or Estimate < 0.5
YARS2	lobule vs duct	-0.658313	0.0550554	0.847632	NS or Estimate < 0.5
MAPK8IP3	lobule vs duct	-0.270329	0.54057	0.972838	NS or Estimate < 0.5
ZBTB8A	lobule vs duct	0.328818	0.435627	0.958249	NS or Estimate < 0.5
PHF11	lobule vs duct	-0.421725	0.151005	0.895684	NS or Estimate < 0.5
ASB1	lobule vs duct	1.03325	0.000529591	0.453242	P < 0.05
RUFY1	lobule vs duct	-0.0715029	0.863301	0.99056	NS or Estimate < 0.5
SLC26A6	lobule vs duct	0.170877	0.727756	0.981102	NS or Estimate < 0.5
SIDT2	lobule vs duct	0.181937	0.662807	0.97862	NS or Estimate < 0.5
RHBDD2	lobule vs duct	0.0272347	0.940626	0.994781	NS or Estimate < 0.5
ERAP1	lobule vs duct	-0.252162	0.447576	0.958249	NS or Estimate < 0.5
NCALD	lobule vs duct	0.374933	0.278667	0.947181	NS or Estimate < 0.5
CRCP	lobule vs duct	0.165047	0.668802	0.97862	NS or Estimate < 0.5
ACP1	lobule vs duct	-0.549726	0.173007	0.91018	NS or Estimate < 0.5
ZXDC	lobule vs duct	0.0877148	0.806972	0.98763	NS or Estimate < 0.5
TTC23	lobule vs duct	-0.457495	0.234497	0.929074	NS or Estimate < 0.5
GAGE1	lobule vs duct	-0.216393	0.633071	0.978398	NS or Estimate < 0.5
INCENP	lobule vs duct	-0.643948	0.0744217	0.873499	NS or Estimate < 0.5
UEVLD	lobule vs duct	-0.167039	0.708046	0.980141	NS or Estimate < 0.5
KIAA0895L	lobule vs duct	0.404159	0.186023	0.915918	NS or Estimate < 0.5
GDAP1	lobule vs duct	0.64327	0.146394	0.895684	NS or Estimate < 0.5
ABCE1	lobule vs duct	-0.566615	0.0334737	0.824123	P < 0.05
RALGDS	lobule vs duct	0.51527	0.110791	0.885803	NS or Estimate < 0.5
RO60	lobule vs duct	0.226061	0.394131	0.958249	NS or Estimate < 0.5
PREPL	lobule vs duct	-0.170277	0.531074	0.971005	NS or Estimate < 0.5
PPP4R1	lobule vs duct	0.217706	0.649202	0.97862	NS or Estimate < 0.5
ANKZF1	lobule vs duct	0.328818	0.286672	0.947181	NS or Estimate < 0.5
CYLD	lobule vs duct	0.408217	0.315813	0.947181	NS or Estimate < 0.5
ZNF596	lobule vs duct	-0.0760554	0.845205	0.988336	NS or Estimate < 0.5
RUFY2	lobule vs duct	-0.551717	0.0497202	0.847619	P < 0.05
CAST	lobule vs duct	0.521814	0.178606	0.914522	NS or Estimate < 0.5
TGFB1I1	lobule vs duct	0.765858	0.0853635	0.879448	NS or Estimate < 0.5
TMEM80	lobule vs duct	-0.335325	0.388785	0.958249	NS or Estimate < 0.5
SUMF2	lobule vs duct	-0.33984	0.285803	0.947181	NS or Estimate < 0.5
GSDMB	lobule vs duct	-0.0506311	0.90728	0.991584	NS or Estimate < 0.5
ACBD5	lobule vs duct	0.13383	0.678746	0.979679	NS or Estimate < 0.5
DEFA1B	lobule vs duct	-0.743436	0.115221	0.885803	NS or Estimate < 0.5
LGALS7B	lobule vs duct	-0.836944	0.0200197	0.775073	P < 0.05
C2orf88	lobule vs duct	-0.239789	0.520711	0.969961	NS or Estimate < 0.5
RIOX2	lobule vs duct	0.0181665	0.959525	0.995673	NS or Estimate < 0.5
NCBP2	lobule vs duct	-0.160465	0.567371	0.977041	NS or Estimate < 0.5
EIF4G2	lobule vs duct	-0.353825	0.458176	0.962565	NS or Estimate < 0.5
CHD2	lobule vs duct	0.10329	0.786594	0.984172	NS or Estimate < 0.5
SNUPN	lobule vs duct	-0.209849	0.614507	0.978398	NS or Estimate < 0.5
ERBB4	lobule vs duct	-0.302079	0.338456	0.94863	NS or Estimate < 0.5
SNX21	lobule vs duct	-0.291734	0.330939	0.948223	NS or Estimate < 0.5
NGDN	lobule vs duct	-0.00981236	0.980002	0.99599	NS or Estimate < 0.5
SHPRH	lobule vs duct	0.439929	0.153409	0.895684	NS or Estimate < 0.5
IQCJ	lobule vs duct	-0.0987377	0.808714	0.98763	NS or Estimate < 0.5
GTPBP10	lobule vs duct	0.504925	0.25495	0.936122	NS or Estimate < 0.5
NECTIN2	lobule vs duct	-0.824987	0.272084	0.941359	NS or Estimate < 0.5
SEC24B	lobule vs duct	-0.291734	0.337834	0.94863	NS or Estimate < 0.5
STAG2	lobule vs duct	0.861691	0.0224993	0.795693	P < 0.05
CSKMT	lobule vs duct	-0.37561	0.449624	0.958249	NS or Estimate < 0.5
ELMSAN1	lobule vs duct	0.163056	0.705376	0.980141	NS or Estimate < 0.5
TPM3	lobule vs duct	-0.128947	0.750277	0.983929	NS or Estimate < 0.5
SLC6A3	lobule vs duct	0.456818	0.192625	0.916861	NS or Estimate < 0.5
NUTM2G	lobule vs duct	0.299592	0.482094	0.966475	NS or Estimate < 0.5
SLC12A2	lobule vs duct	0.50906	0.227048	0.929074	NS or Estimate < 0.5
SRD5A1	lobule vs duct	-0.474385	0.278174	0.947181	NS or Estimate < 0.5
DPH3	lobule vs duct	-0.13323	0.783132	0.984172	NS or Estimate < 0.5
SST	lobule vs duct	-0.224214	0.481157	0.966475	NS or Estimate < 0.5
PHACTR4	lobule vs duct	-0.221325	0.586709	0.977041	NS or Estimate < 0.5
CLCC1	lobule vs duct	-0.0883922	0.756681	0.983929	NS or Estimate < 0.5
DBNDD2	lobule vs duct	-0.450952	0.266324	0.941359	NS or Estimate < 0.5
UBL5	lobule vs duct	-0.371094	0.286917	0.947181	NS or Estimate < 0.5
SMIM15	lobule vs duct	0.152711	0.617993	0.978398	NS or Estimate < 0.5
SSTR4	lobule vs duct	-0.508907	0.15518	0.895684	NS or Estimate < 0.5
SULT1A2	lobule vs duct	-0.255964	0.552519	0.975314	NS or Estimate < 0.5
TBXAS1	lobule vs duct	0.622579	0.0666758	0.856626	NS or Estimate < 0.5
TKT	lobule vs duct	0.128	0.77129	0.984172	NS or Estimate < 0.5
TNFRSF1A	lobule vs duct	-0.262508	0.381592	0.958249	NS or Estimate < 0.5
TNFRSF1B	lobule vs duct	0.0415995	0.922885	0.993088	NS or Estimate < 0.5
TOP2B	lobule vs duct	0.0798937	0.832979	0.988336	NS or Estimate < 0.5
TUBB2A	lobule vs duct	0.198826	0.573066	0.977041	NS or Estimate < 0.5
TUBG1	lobule vs duct	0.0247103	0.95334	0.995249	NS or Estimate < 0.5
MZT1	lobule vs duct	0.157226	0.680526	0.979679	NS or Estimate < 0.5
UGT2B11	lobule vs duct	-0.435376	0.26295	0.941091	NS or Estimate < 0.5
MOCS1	lobule vs duct	0.0877148	0.811237	0.98763	NS or Estimate < 0.5
UGT2B15	lobule vs duct	-0.310614	0.263368	0.941091	NS or Estimate < 0.5
LYRM9	lobule vs duct	0.909797	0.0232093	0.795693	P < 0.05
ZNF391	lobule vs duct	-0.373619	0.297318	0.947181	NS or Estimate < 0.5
SLC7A6	lobule vs duct	-0.476376	0.329299	0.948223	NS or Estimate < 0.5
QSER1	lobule vs duct	-0.614722	0.185709	0.915918	NS or Estimate < 0.5
METTL9	lobule vs duct	-1.09539	0.00578277	0.677763	P < 0.05
CDC14B	lobule vs duct	-1.02087	0.00269253	0.575791	P < 0.05
FSCN2	lobule vs duct	0.311928	0.34702	0.951599	NS or Estimate < 0.5
MYH14	lobule vs duct	-0.264499	0.469226	0.964543	NS or Estimate < 0.5
HS6ST2	lobule vs duct	-0.371094	0.431402	0.958249	NS or Estimate < 0.5
ZNF436	lobule vs duct	0.832428	0.0591992	0.849867	NS or Estimate < 0.5
ATG9A	lobule vs duct	-0.511432	0.0462971	0.844531	P < 0.05
SPPL2B	lobule vs duct	-0.0258816	0.954457	0.995249	NS or Estimate < 0.5
UBXN11	lobule vs duct	-0.268558	0.439543	0.958249	NS or Estimate < 0.5
WIPF1	lobule vs duct	-0.890317	0.0487254	0.847619	P < 0.05
ZNF682	lobule vs duct	0.191005	0.605088	0.978398	NS or Estimate < 0.5
DPH5	lobule vs duct	0.0584887	0.88708	0.991584	NS or Estimate < 0.5
TMEM231	lobule vs duct	-0.281388	0.476297	0.964543	NS or Estimate < 0.5
ZNF586	lobule vs duct	-0.463325	0.251139	0.93397	NS or Estimate < 0.5
BCLAF1	lobule vs duct	-0.0110595	0.97164	0.99599	NS or Estimate < 0.5
TSEN34	lobule vs duct	-0.40615	0.261164	0.941091	NS or Estimate < 0.5
SLC38A1	lobule vs duct	0.317758	0.472496	0.964543	NS or Estimate < 0.5
KLK5	lobule vs duct	0.407397	0.107426	0.885803	NS or Estimate < 0.5
NFKB2	lobule vs duct	-0.265813	0.530187	0.971005	NS or Estimate < 0.5
FAM222B	lobule vs duct	-0.453893	0.174275	0.911891	NS or Estimate < 0.5
SLC39A7	lobule vs duct	0.181937	0.507784	0.969961	NS or Estimate < 0.5
UBXN2B	lobule vs duct	0.439929	0.229677	0.929074	NS or Estimate < 0.5
VPS37D	lobule vs duct	-0.651769	0.155718	0.895684	NS or Estimate < 0.5
APH1A	lobule vs duct	-0.486721	0.223019	0.929074	NS or Estimate < 0.5
TNFAIP8	lobule vs duct	-0.197512	0.545455	0.975314	NS or Estimate < 0.5
SMCO1	lobule vs duct	0.228052	0.448574	0.958249	NS or Estimate < 0.5
ALG9	lobule vs duct	-0.327504	0.418022	0.958249	NS or Estimate < 0.5
MIER1	lobule vs duct	-0.391785	0.308402	0.947181	NS or Estimate < 0.5
RGPD2	lobule vs duct	-0.281388	0.59983	0.978398	NS or Estimate < 0.5
RTL8C	lobule vs duct	-0.0636819	0.861854	0.99056	NS or Estimate < 0.5
RTL8A	lobule vs duct	-0.117618	0.705899	0.980141	NS or Estimate < 0.5
ASAH2B	lobule vs duct	-0.293725	0.360862	0.954587	NS or Estimate < 0.5
KTN1	lobule vs duct	0.459896	0.549694	0.975314	NS or Estimate < 0.5
TRAPPC6B	lobule vs duct	0.106595	0.679012	0.979679	NS or Estimate < 0.5
HNRNPUL2	lobule vs duct	-0.117618	0.790289	0.984667	NS or Estimate < 0.5
TMTC4	lobule vs duct	0.549048	0.07051	0.870337	NS or Estimate < 0.5
FNDC3A	lobule vs duct	-0.421725	0.166833	0.903491	NS or Estimate < 0.5
KIAA1191	lobule vs duct	-0.0422769	0.919002	0.992422	NS or Estimate < 0.5
N4BP2L1	lobule vs duct	0.328818	0.514663	0.969961	NS or Estimate < 0.5
PGA3	lobule vs duct	0.862968	0.00468563	0.672937	P < 0.05
XIRP2	lobule vs duct	0.496389	0.122255	0.888435	NS or Estimate < 0.5
CLRN2	lobule vs duct	-0.43609	0.319825	0.947181	NS or Estimate < 0.5
OCIAD1	lobule vs duct	-0.174793	0.643623	0.978398	NS or Estimate < 0.5
CASZ1	lobule vs duct	0.288532	0.536489	0.971549	NS or Estimate < 0.5
DBI	lobule vs duct	0.279006	0.369124	0.956368	NS or Estimate < 0.5
BCS1L	lobule vs duct	-0.769424	0.0288165	0.822071	P < 0.05
CUL4B	lobule vs duct	-0.281388	0.422713	0.958249	NS or Estimate < 0.5
VAV3	lobule vs duct	-0.59986	0.218908	0.929074	NS or Estimate < 0.5
RASA4	lobule vs duct	-0.701123	0.0328044	0.824123	P < 0.05
PRKD2	lobule vs duct	0.051945	0.886297	0.991584	NS or Estimate < 0.5
OR7E24	lobule vs duct	-0.346384	0.406929	0.958249	NS or Estimate < 0.5
LDB3	lobule vs duct	0.0773693	0.855333	0.99056	NS or Estimate < 0.5
CT47A10	lobule vs duct	0.500409	0.244465	0.931251	NS or Estimate < 0.5
ECPAS	lobule vs duct	-0.41721	0.341287	0.949323	NS or Estimate < 0.5
PLIN4	lobule vs duct	-0.172088	0.626512	0.978398	NS or Estimate < 0.5
PPM1N	lobule vs duct	-0.486721	0.204877	0.924467	NS or Estimate < 0.5
ZNF99	lobule vs duct	0.152711	0.66987	0.97874	NS or Estimate < 0.5
U2SURP	lobule vs duct	-0.35673	0.317986	0.947181	NS or Estimate < 0.5
DLGAP3	lobule vs duct	-0.625067	0.0697985	0.870337	NS or Estimate < 0.5
UNK	lobule vs duct	0.171591	0.64834	0.97862	NS or Estimate < 0.5
KDM6B	lobule vs duct	0.081171	0.833776	0.988336	NS or Estimate < 0.5
SLC45A4	lobule vs duct	0.0227189	0.949257	0.995249	NS or Estimate < 0.5
FTO	lobule vs duct	-0.151397	0.630597	0.978398	NS or Estimate < 0.5
LMTK3	lobule vs duct	0.33337	0.427744	0.958249	NS or Estimate < 0.5
IGSF5	lobule vs duct	-0.327504	0.236689	0.929074	NS or Estimate < 0.5
SERPINA11	lobule vs duct	0.0877148	0.807984	0.98763	NS or Estimate < 0.5
GPR108	lobule vs duct	-0.57515	0.157708	0.899077	NS or Estimate < 0.5
INTS1	lobule vs duct	-0.0883922	0.810311	0.98763	NS or Estimate < 0.5
MYO5B	lobule vs duct	0.309937	0.474967	0.964543	NS or Estimate < 0.5
FBXO46	lobule vs duct	-0.329495	0.214453	0.929074	NS or Estimate < 0.5
PLEKHM3	lobule vs duct	-0.621265	0.0931532	0.879448	NS or Estimate < 0.5
TENM3	lobule vs duct	-0.912285	0.00336788	0.617645	P < 0.05
ARHGEF28	lobule vs duct	-0.421725	0.247833	0.932324	NS or Estimate < 0.5
MBOAT1	lobule vs duct	0.374933	0.23681	0.929074	NS or Estimate < 0.5
AJM1	lobule vs duct	-0.0591661	0.852205	0.990398	NS or Estimate < 0.5
PABPN1L	lobule vs duct	-0.241103	0.635339	0.978398	NS or Estimate < 0.5
PRSS54	lobule vs duct	-0.0591661	0.892257	0.991584	NS or Estimate < 0.5
ZNF823	lobule vs duct	-0.134507	0.743757	0.983929	NS or Estimate < 0.5
TNRC18	lobule vs duct	-0.48473	0.277501	0.946107	NS or Estimate < 0.5
RGP1	lobule vs duct	-0.578952	0.148151	0.895684	NS or Estimate < 0.5
MEGF9	lobule vs duct	0.116941	0.757704	0.983929	NS or Estimate < 0.5
CCDC159	lobule vs duct	-0.134507	0.632517	0.978398	NS or Estimate < 0.5
TBX18	lobule vs duct	-0.0188806	0.967901	0.99599	NS or Estimate < 0.5
TSPAN11	lobule vs duct	-0.0275207	0.903232	0.991584	NS or Estimate < 0.5
SETD5	lobule vs duct	-0.191682	0.623502	0.978398	NS or Estimate < 0.5
RASSF10	lobule vs duct	0.0494205	0.885452	0.991584	NS or Estimate < 0.5
WIPF3	lobule vs duct	0.409989	0.187993	0.915918	NS or Estimate < 0.5
C4orf51	lobule vs duct	-0.443197	0.272733	0.941359	NS or Estimate < 0.5
UNC119B	lobule vs duct	-0.844671	0.0518061	0.847632	NS or Estimate < 0.5
UNC13C	lobule vs duct	0.985139	0.0257862	0.810845	P < 0.05
AKR1B15	lobule vs duct	0.125476	0.646757	0.97862	NS or Estimate < 0.5
MGA	lobule vs duct	-0.180623	0.592992	0.977041	NS or Estimate < 0.5
ZNF799	lobule vs duct	-0.977281	0.00629448	0.677763	P < 0.05
TMEM120B	lobule vs duct	0.217706	0.58384	0.977041	NS or Estimate < 0.5
DMRTC1B	lobule vs duct	-0.163733	0.667854	0.97862	NS or Estimate < 0.5
PXN	lobule vs duct	-0.326162	0.494934	0.968564	NS or Estimate < 0.5
JMJD6	lobule vs duct	0.198826	0.550225	0.975314	NS or Estimate < 0.5
THOC2	lobule vs duct	-0.591325	0.132468	0.894373	NS or Estimate < 0.5
SPAG11A	lobule vs duct	-0.0760187	0.761447	0.983989	NS or Estimate < 0.5
ELN	lobule vs duct	-0.241103	0.499431	0.969783	NS or Estimate < 0.5
ACD	lobule vs duct	0.486044	0.14192	0.895684	NS or Estimate < 0.5
NKAPD1	lobule vs duct	-0.367789	0.285249	0.947181	NS or Estimate < 0.5
GPD2	lobule vs duct	0.116941	0.64273	0.978398	NS or Estimate < 0.5
ZNF133	lobule vs duct	0.640746	0.229979	0.929074	NS or Estimate < 0.5
FAM86B1	lobule vs duct	0.1696	0.593772	0.977041	NS or Estimate < 0.5
RABEP1	lobule vs duct	-0.35673	0.328709	0.948223	NS or Estimate < 0.5
NARF	lobule vs duct	-0.213868	0.551979	0.975314	NS or Estimate < 0.5
RB1CC1	lobule vs duct	-0.636193	0.123831	0.888435	NS or Estimate < 0.5
STRN3	lobule vs duct	-0.382154	0.320935	0.948223	NS or Estimate < 0.5
GP6	lobule vs duct	-0.218164	0.583254	0.977041	NS or Estimate < 0.5
BANK1	lobule vs duct	-0.235273	0.548574	0.975314	NS or Estimate < 0.5
ADGRA1	lobule vs duct	0.14489	0.750306	0.983929	NS or Estimate < 0.5
WBP1L	lobule vs duct	-0.113102	0.723093	0.980141	NS or Estimate < 0.5
ZNF655	lobule vs duct	-0.395024	0.199523	0.917019	NS or Estimate < 0.5
TCF4	lobule vs duct	-0.146844	0.762224	0.983989	NS or Estimate < 0.5
PLOD3	lobule vs duct	0.051945	0.918535	0.992422	NS or Estimate < 0.5
DDTL	lobule vs duct	-0.199503	0.609338	0.978398	NS or Estimate < 0.5
SERPINA3	lobule vs duct	0.0688342	0.846605	0.988407	NS or Estimate < 0.5
MCC	lobule vs duct	0.051945	0.864068	0.99056	NS or Estimate < 0.5
TMEM213	lobule vs duct	0.126802	0.657151	0.97862	NS or Estimate < 0.5
MYSM1	lobule vs duct	0.391822	0.294515	0.947181	NS or Estimate < 0.5
NDUFAF8	lobule vs duct	-0.367492	0.429539	0.958249	NS or Estimate < 0.5
AAMP	lobule vs duct	0.215638	0.411009	0.958249	NS or Estimate < 0.5
ABCA3	lobule vs duct	-0.124162	0.77367	0.984172	NS or Estimate < 0.5
ABCF1	lobule vs duct	-0.275262	0.419063	0.958249	NS or Estimate < 0.5
ABR	lobule vs duct	0.0617272	0.880284	0.991584	NS or Estimate < 0.5
ACACB	lobule vs duct	-0.522491	0.0985918	0.879448	NS or Estimate < 0.5
CCDC102B	lobule vs duct	0.504925	0.0446716	0.838716	P < 0.05
TRAPPC13	lobule vs duct	0.446472	0.333477	0.948223	NS or Estimate < 0.5
MCRIP1	lobule vs duct	-0.00290471	0.994077	0.997087	NS or Estimate < 0.5
ASIC1	lobule vs duct	0.244941	0.431144	0.958249	NS or Estimate < 0.5
ACR	lobule vs duct	-0.267804	0.590809	0.977041	NS or Estimate < 0.5
SPRR3	lobule vs duct	0.280711	0.395125	0.958249	NS or Estimate < 0.5
SLC35G2	lobule vs duct	0.179945	0.680643	0.979679	NS or Estimate < 0.5
GPR89A	lobule vs duct	-0.199503	0.643002	0.978398	NS or Estimate < 0.5
TMEM184A	lobule vs duct	0.152711	0.648638	0.97862	NS or Estimate < 0.5
ACO2	lobule vs duct	0.181937	0.619196	0.978398	NS or Estimate < 0.5
GPR18	lobule vs duct	-0.0669872	0.867974	0.990987	NS or Estimate < 0.5
HNRNPF	lobule vs duct	-0.0123368	0.979859	0.99599	NS or Estimate < 0.5
CTNNB1	lobule vs duct	-0.164282	0.654036	0.97862	NS or Estimate < 0.5
HDAC7	lobule vs duct	-0.508543	0.151888	0.895684	NS or Estimate < 0.5
DLG1	lobule vs duct	-0.832428	0.0457652	0.841491	P < 0.05
SMARCD2	lobule vs duct	-0.402845	0.269229	0.941359	NS or Estimate < 0.5
GRSF1	lobule vs duct	-0.532837	0.0569232	0.847632	NS or Estimate < 0.5
SLC4A4	lobule vs duct	-0.0753047	0.844523	0.988336	NS or Estimate < 0.5
ZNF419	lobule vs duct	0.58681	0.155619	0.895684	NS or Estimate < 0.5
CHCHD4	lobule vs duct	0.051945	0.876378	0.991584	NS or Estimate < 0.5
PTPRJ	lobule vs duct	0.14489	0.737319	0.982517	NS or Estimate < 0.5
RAPGEF3	lobule vs duct	-0.690063	0.0268794	0.814429	P < 0.05
SIGLEC14	lobule vs duct	-0.199503	0.501976	0.969783	NS or Estimate < 0.5
PUS7L	lobule vs duct	0.081171	0.818523	0.98763	NS or Estimate < 0.5
OBSCN	lobule vs duct	-0.440644	0.035797	0.824123	NS or Estimate < 0.5
RBM47	lobule vs duct	0.209885	0.586462	0.977041	NS or Estimate < 0.5
RNF169	lobule vs duct	-0.291734	0.40236	0.958249	NS or Estimate < 0.5
GTF2H2C	lobule vs duct	0.0584887	0.890163	0.991584	NS or Estimate < 0.5
BET1L	lobule vs duct	0.0980603	0.766971	0.984172	NS or Estimate < 0.5
CEP78	lobule vs duct	-0.199503	0.573207	0.977041	NS or Estimate < 0.5
C9orf129	lobule vs duct	-0.0695116	0.809679	0.98763	NS or Estimate < 0.5
SEPTIN8	lobule vs duct	0.0161752	0.967375	0.99599	NS or Estimate < 0.5
TMEM91	lobule vs duct	-0.180623	0.543355	0.974447	NS or Estimate < 0.5
RAD51AP2	lobule vs duct	-0.0123368	0.980866	0.99599	NS or Estimate < 0.5
CCDC43	lobule vs duct	0.372408	0.280605	0.947181	NS or Estimate < 0.5
ZNF506	lobule vs duct	-0.786313	0.0561129	0.847632	NS or Estimate < 0.5
ZBTB34	lobule vs duct	0.572445	0.228348	0.929074	NS or Estimate < 0.5
TINF2	lobule vs duct	-0.327504	0.446828	0.958249	NS or Estimate < 0.5
MROH1	lobule vs duct	-0.362559	0.302905	0.947181	NS or Estimate < 0.5
NUTM2A	lobule vs duct	0.0856868	0.82	0.98763	NS or Estimate < 0.5
COMMD7	lobule vs duct	-0.264499	0.304492	0.947181	NS or Estimate < 0.5
SGCE	lobule vs duct	0.0350558	0.934709	0.994618	NS or Estimate < 0.5
KAT6A	lobule vs duct	-0.134507	0.758885	0.983929	NS or Estimate < 0.5
BCAS3	lobule vs duct	0.10329	0.736279	0.98232	NS or Estimate < 0.5
ULK3	lobule vs duct	-0.213868	0.676231	0.979679	NS or Estimate < 0.5
CPPED1	lobule vs duct	0.0877148	0.747772	0.983929	NS or Estimate < 0.5
LRRC58	lobule vs duct	0.0584887	0.886912	0.991584	NS or Estimate < 0.5
NXF2	lobule vs duct	0.446472	0.330603	0.948223	NS or Estimate < 0.5
EIF5AL1	lobule vs duct	0.326826	0.397921	0.958249	NS or Estimate < 0.5
ZNF578	lobule vs duct	0.293048	0.410436	0.958249	NS or Estimate < 0.5
RSPH10B2	lobule vs duct	-0.621265	0.0549162	0.847632	NS or Estimate < 0.5
FBXL19	lobule vs duct	-0.116341	0.700041	0.980141	NS or Estimate < 0.5
ITPR1	lobule vs duct	0.56992	0.0935194	0.879448	NS or Estimate < 0.5
PDS5A	lobule vs duct	-0.00782104	0.985993	0.99599	NS or Estimate < 0.5
SENP6	lobule vs duct	-0.428269	0.355744	0.954548	NS or Estimate < 0.5
FAM184A	lobule vs duct	-0.117618	0.72977	0.981102	NS or Estimate < 0.5
DROSHA	lobule vs duct	0.67904	0.162667	0.90165	NS or Estimate < 0.5
UBR7	lobule vs duct	0.0227189	0.9534	0.995249	NS or Estimate < 0.5
REX1BD	lobule vs duct	-0.532837	0.12084	0.888435	NS or Estimate < 0.5
SPATS2L	lobule vs duct	-0.134507	0.678512	0.979679	NS or Estimate < 0.5
RAP1GDS1	lobule vs duct	0.00383839	0.992353	0.99599	NS or Estimate < 0.5
VSIG4	lobule vs duct	0.0773693	0.816643	0.98763	NS or Estimate < 0.5
PLEKHB2	lobule vs duct	0.318472	0.469485	0.964543	NS or Estimate < 0.5
CXCL16	lobule vs duct	0.044124	0.906429	0.991584	NS or Estimate < 0.5
TMEM176B	lobule vs duct	0.709185	0.23218	0.929074	NS or Estimate < 0.5
ZNF883	lobule vs duct	-0.0591661	0.865554	0.99056	NS or Estimate < 0.5
CCDC160	lobule vs duct	0.106595	0.815317	0.98763	NS or Estimate < 0.5
IGLON5	lobule vs duct	-0.159218	0.717343	0.980141	NS or Estimate < 0.5
CLDN25	lobule vs duct	-0.329275	0.623856	0.978398	NS or Estimate < 0.5
CXXC1	lobule vs duct	-0.134507	0.58884	0.977041	NS or Estimate < 0.5
NRDC	lobule vs duct	0.716801	0.0847228	0.879448	NS or Estimate < 0.5
ACOX3	lobule vs duct	0.274167	0.492029	0.968236	NS or Estimate < 0.5
ZNF219	lobule vs duct	-0.0506311	0.893251	0.991584	NS or Estimate < 0.5
SAMD12	lobule vs duct	-0.474385	0.166747	0.903491	NS or Estimate < 0.5
FAM13B	lobule vs duct	0.790151	0.0809519	0.879448	NS or Estimate < 0.5
ACTN1	lobule vs duct	0.189377	0.513169	0.969961	NS or Estimate < 0.5
DGLUCY	lobule vs duct	-0.140337	0.758222	0.983929	NS or Estimate < 0.5
FOXRED2	lobule vs duct	0.181937	0.622334	0.978398	NS or Estimate < 0.5
TTI2	lobule vs duct	-0.123448	0.728049	0.981102	NS or Estimate < 0.5
PCTP	lobule vs duct	0.256001	0.529992	0.971005	NS or Estimate < 0.5
RGS8	lobule vs duct	0.282702	0.463063	0.962672	NS or Estimate < 0.5
AQP12B	lobule vs duct	-0.0695116	0.777553	0.984172	NS or Estimate < 0.5
IFT43	lobule vs duct	-0.522491	0.0892231	0.879448	NS or Estimate < 0.5
COL6A6	lobule vs duct	-0.438615	0.170679	0.907705	NS or Estimate < 0.5
SLC35G6	lobule vs duct	-0.385956	0.379033	0.958249	NS or Estimate < 0.5
ZNF554	lobule vs duct	0.561385	0.192537	0.916861	NS or Estimate < 0.5
ZNF836	lobule vs duct	0.152711	0.715533	0.980141	NS or Estimate < 0.5
RRAS2	lobule vs duct	0.171591	0.637808	0.978398	NS or Estimate < 0.5
GIGYF2	lobule vs duct	0.358044	0.360797	0.954587	NS or Estimate < 0.5
PNMA8A	lobule vs duct	-0.0987377	0.813006	0.98763	NS or Estimate < 0.5
AADACL3	lobule vs duct	-0.421725	0.356488	0.954548	NS or Estimate < 0.5
BICDL2	lobule vs duct	-0.190929	0.50488	0.969783	NS or Estimate < 0.5
CNPY1	lobule vs duct	0.0415995	0.900334	0.991584	NS or Estimate < 0.5
ACVR1	lobule vs duct	-0.115627	0.691514	0.979679	NS or Estimate < 0.5
FBRS	lobule vs duct	-0.444279	0.0972643	0.879448	NS or Estimate < 0.5
LAMA4	lobule vs duct	-0.316444	0.430873	0.958249	NS or Estimate < 0.5
ASH2L	lobule vs duct	-0.170277	0.677303	0.979679	NS or Estimate < 0.5
CORO1C	lobule vs duct	0.18848	0.585736	0.977041	NS or Estimate < 0.5
ARMC5	lobule vs duct	-0.0233963	0.956322	0.995249	NS or Estimate < 0.5
ZFYVE16	lobule vs duct	0.0123735	0.977422	0.99599	NS or Estimate < 0.5
SWT1	lobule vs duct	0.55104	0.18325	0.915918	NS or Estimate < 0.5
NUDT19	lobule vs duct	0.234596	0.493342	0.968564	NS or Estimate < 0.5
HMX3	lobule vs duct	0.289246	0.523602	0.969961	NS or Estimate < 0.5
SOWAHD	lobule vs duct	-0.205333	0.591727	0.977041	NS or Estimate < 0.5
LRRC30	lobule vs duct	-0.763726	0.228391	0.929074	NS or Estimate < 0.5
TTC24	lobule vs duct	0.116197	0.864729	0.99056	NS or Estimate < 0.5
ACYP1	lobule vs duct	0.271643	0.581912	0.977041	NS or Estimate < 0.5
HECTD4	lobule vs duct	-0.673174	0.126725	0.888435	NS or Estimate < 0.5
GSG1L	lobule vs duct	1.20736	0.000249928	0.42143	P < 0.05
ZFP57	lobule vs duct	0.14489	0.688454	0.979679	NS or Estimate < 0.5
SYNPO	lobule vs duct	0.651805	0.173989	0.911891	NS or Estimate < 0.5
FAM160A1	lobule vs duct	-0.141051	0.715472	0.980141	NS or Estimate < 0.5
ADAM10	lobule vs duct	0.181937	0.578116	0.977041	NS or Estimate < 0.5
PRH2	lobule vs duct	-0.0130508	0.972155	0.99599	NS or Estimate < 0.5
TMEM87A	lobule vs duct	-0.140337	0.678982	0.979679	NS or Estimate < 0.5
SLC35E2B	lobule vs duct	-0.999103	0.00277845	0.575791	P < 0.05
MECP2	lobule vs duct	-0.145567	0.644085	0.978398	NS or Estimate < 0.5
NAA16	lobule vs duct	-0.346384	0.461333	0.962672	NS or Estimate < 0.5
ADAR	lobule vs duct	0.483519	0.261752	0.941091	NS or Estimate < 0.5
NAV2	lobule vs duct	0.425564	0.103407	0.885803	NS or Estimate < 0.5
NHLH2	lobule vs duct	0.124762	0.722369	0.980141	NS or Estimate < 0.5
ARHGEF25	lobule vs duct	-0.0695116	0.845599	0.988336	NS or Estimate < 0.5
DDX54	lobule vs duct	0.0650325	0.824756	0.987647	NS or Estimate < 0.5
TASOR	lobule vs duct	0.486044	0.14922	0.895684	NS or Estimate < 0.5
TSTD1	lobule vs duct	-0.301546	0.420624	0.958249	NS or Estimate < 0.5
TEN1	lobule vs duct	0.538703	0.130465	0.890283	NS or Estimate < 0.5
TBC1D14	lobule vs duct	-0.224214	0.466615	0.963631	NS or Estimate < 0.5
FER1L5	lobule vs duct	-0.402845	0.250803	0.93397	NS or Estimate < 0.5
LDB1	lobule vs duct	0.415218	0.176895	0.914522	NS or Estimate < 0.5
ARHGEF7	lobule vs duct	0.00582971	0.989098	0.99599	NS or Estimate < 0.5
ZNF276	lobule vs duct	-0.151397	0.691958	0.979679	NS or Estimate < 0.5
LIMA1	lobule vs duct	0.0818851	0.837154	0.988336	NS or Estimate < 0.5
RNF180	lobule vs duct	0.0630045	0.861057	0.99056	NS or Estimate < 0.5
ENTPD6	lobule vs duct	0.209171	0.561177	0.97683	NS or Estimate < 0.5
LSM14A	lobule vs duct	-0.176821	0.630048	0.978398	NS or Estimate < 0.5
C1QC	lobule vs duct	0.274167	0.51631	0.969961	NS or Estimate < 0.5
SLC44A3	lobule vs duct	0.00582971	0.987722	0.99599	NS or Estimate < 0.5
TTC22	lobule vs duct	-0.0108991	0.986694	0.99599	NS or Estimate < 0.5
CTSC	lobule vs duct	0.353528	0.362195	0.955618	NS or Estimate < 0.5
AEBP2	lobule vs duct	-0.697884	0.139799	0.895684	NS or Estimate < 0.5
CLCN7	lobule vs duct	-0.274845	0.464284	0.962672	NS or Estimate < 0.5
TENT2	lobule vs duct	0.0330644	0.939383	0.994781	NS or Estimate < 0.5
DHX36	lobule vs duct	-0.38144	0.274017	0.94245	NS or Estimate < 0.5
SZRD1	lobule vs duct	-0.306099	0.401444	0.958249	NS or Estimate < 0.5
JMJD7	lobule vs duct	0.128	0.774484	0.984172	NS or Estimate < 0.5
FANCL	lobule vs duct	-0.264499	0.478708	0.964917	NS or Estimate < 0.5
PRRT4	lobule vs duct	-0.199503	0.572161	0.977041	NS or Estimate < 0.5
TMEM240	lobule vs duct	0.423039	0.249823	0.93397	NS or Estimate < 0.5
ENG	lobule vs duct	-0.0695116	0.857807	0.99056	NS or Estimate < 0.5
ADCY8	lobule vs duct	-0.0422769	0.893908	0.991584	NS or Estimate < 0.5
KANSL3	lobule vs duct	0.954302	0.0316751	0.824123	P < 0.05
WDR26	lobule vs duct	-0.41721	0.276836	0.945496	NS or Estimate < 0.5
ADCY9	lobule vs duct	0.100052	0.789508	0.984609	NS or Estimate < 0.5
ADCYAP1	lobule vs duct	0.391822	0.281568	0.947181	NS or Estimate < 0.5
ADD1	lobule vs duct	-0.0695116	0.870422	0.991248	NS or Estimate < 0.5
ADD3	lobule vs duct	-0.151397	0.709421	0.980141	NS or Estimate < 0.5
PLIN2	lobule vs duct	0.1696	0.626179	0.978398	NS or Estimate < 0.5
ABCD3	lobule vs duct	0.368389	0.408045	0.958249	NS or Estimate < 0.5
TENM2	lobule vs duct	-0.32096	0.353603	0.953824	NS or Estimate < 0.5
PRR32	lobule vs duct	0.293048	0.424941	0.958249	NS or Estimate < 0.5
ZBTB37	lobule vs duct	0.051945	0.899215	0.991584	NS or Estimate < 0.5
SLC50A1	lobule vs duct	-0.367075	0.42568	0.958249	NS or Estimate < 0.5
NAPEPLD	lobule vs duct	0.282702	0.316797	0.947181	NS or Estimate < 0.5
GGT6	lobule vs duct	0.304848	0.613283	0.978398	NS or Estimate < 0.5
C1orf194	lobule vs duct	0.0415995	0.902373	0.991584	NS or Estimate < 0.5
RPTN	lobule vs duct	0.177421	0.6757	0.979679	NS or Estimate < 0.5
ADK	lobule vs duct	0.267623	0.450417	0.958249	NS or Estimate < 0.5
ARIH2OS	lobule vs duct	-0.0695116	0.855752	0.99056	NS or Estimate < 0.5
CCR2	lobule vs duct	0.0708255	0.864572	0.99056	NS or Estimate < 0.5
ZBTB1	lobule vs duct	-0.265213	0.541571	0.973325	NS or Estimate < 0.5
PARK7	lobule vs duct	-0.10329	0.724562	0.980141	NS or Estimate < 0.5
ADSL	lobule vs duct	0.198826	0.575623	0.977041	NS or Estimate < 0.5
KRTAP2-1	lobule vs duct	0.651805	0.0988115	0.879448	NS or Estimate < 0.5
ADM	lobule vs duct	0.263822	0.39306	0.958249	NS or Estimate < 0.5
PABPC1L	lobule vs duct	-0.402845	0.190357	0.916644	NS or Estimate < 0.5
CASK	lobule vs duct	-0.0942219	0.848243	0.989309	NS or Estimate < 0.5
SLC12A3	lobule vs duct	0.521814	0.194659	0.916861	NS or Estimate < 0.5
SLC25A19	lobule vs duct	-0.117618	0.639513	0.978398	NS or Estimate < 0.5
THTPA	lobule vs duct	0.389298	0.194966	0.916861	NS or Estimate < 0.5
PIGG	lobule vs duct	-0.245619	0.567767	0.977041	NS or Estimate < 0.5
MYO7A	lobule vs duct	-0.327504	0.426406	0.958249	NS or Estimate < 0.5
CENPL	lobule vs duct	-0.568606	0.10871	0.885803	NS or Estimate < 0.5
CFLAR	lobule vs duct	0.855861	0.0456926	0.841491	P < 0.05
PCID2	lobule vs duct	-0.187327	0.607265	0.978398	NS or Estimate < 0.5
HMOX2	lobule vs duct	-0.851309	0.0576087	0.847632	NS or Estimate < 0.5
TET2	lobule vs duct	-0.578952	0.0845338	0.879448	NS or Estimate < 0.5
AURKAIP1	lobule vs duct	0.208935	0.629629	0.978398	NS or Estimate < 0.5
GPBP1	lobule vs duct	-0.224214	0.520726	0.969961	NS or Estimate < 0.5
UBAP2L	lobule vs duct	0.197569	0.787514	0.984172	NS or Estimate < 0.5
MAD2L2	lobule vs duct	-0.0233963	0.951987	0.995249	NS or Estimate < 0.5
CDCA7L	lobule vs duct	-0.224214	0.440989	0.958249	NS or Estimate < 0.5
MYRF	lobule vs duct	-0.0537317	0.918352	0.992422	NS or Estimate < 0.5
STXBP2	lobule vs duct	0.771271	0.0240839	0.795693	P < 0.05
YPEL5	lobule vs duct	-0.822083	0.0411751	0.828331	P < 0.05
CRY2	lobule vs duct	-0.291734	0.433681	0.958249	NS or Estimate < 0.5
ZNF469	lobule vs duct	0.142365	0.723418	0.980141	NS or Estimate < 0.5
ANK2	lobule vs duct	-0.725833	0.0973099	0.879448	NS or Estimate < 0.5
ING4	lobule vs duct	-0.873991	0.0170492	0.775073	P < 0.05
KCNE1	lobule vs duct	-0.140337	0.690561	0.979679	NS or Estimate < 0.5
BEX4	lobule vs duct	-0.100766	0.834957	0.988336	NS or Estimate < 0.5
CTSA	lobule vs duct	-0.0760554	0.860981	0.99056	NS or Estimate < 0.5
ETFA	lobule vs duct	-0.603662	0.180221	0.914522	NS or Estimate < 0.5
CEACAM19	lobule vs duct	0.200817	0.651066	0.97862	NS or Estimate < 0.5
KRTAP20-3	lobule vs duct	0.472096	0.175277	0.911891	NS or Estimate < 0.5
AP4S1	lobule vs duct	0.428869	0.242331	0.931251	NS or Estimate < 0.5
ZEB1	lobule vs duct	-0.00451578	0.990483	0.99599	NS or Estimate < 0.5
ATXN7	lobule vs duct	-0.37561	0.353283	0.953824	NS or Estimate < 0.5
UBP1	lobule vs duct	0.73369	0.0640511	0.849867	NS or Estimate < 0.5
PAK3	lobule vs duct	0.0143648	0.966494	0.99599	NS or Estimate < 0.5
UGT8	lobule vs duct	0.55104	0.172327	0.909393	NS or Estimate < 0.5
SULF1	lobule vs duct	-0.271043	0.246474	0.931854	NS or Estimate < 0.5
SPRED2	lobule vs duct	0.651805	0.218887	0.929074	NS or Estimate < 0.5
WDSUB1	lobule vs duct	0.754381	0.09992	0.88229	NS or Estimate < 0.5
VGLL4	lobule vs duct	-0.105281	0.783049	0.984172	NS or Estimate < 0.5
SLC39A13	lobule vs duct	0.216429	0.667572	0.97862	NS or Estimate < 0.5
DIS3	lobule vs duct	-0.205333	0.58856	0.977041	NS or Estimate < 0.5
TPRN	lobule vs duct	0.0415995	0.894887	0.991584	NS or Estimate < 0.5
LYRM1	lobule vs duct	0.328818	0.426514	0.958249	NS or Estimate < 0.5
LACC1	lobule vs duct	-0.245619	0.551632	0.975314	NS or Estimate < 0.5
TSPAN14	lobule vs duct	-0.0695116	0.874418	0.991418	NS or Estimate < 0.5
MPV17L	lobule vs duct	-0.241103	0.548318	0.975314	NS or Estimate < 0.5
AP1AR	lobule vs duct	0.0877148	0.769411	0.984172	NS or Estimate < 0.5
MAPKBP1	lobule vs duct	-0.0542542	0.837614	0.988336	NS or Estimate < 0.5
USP8	lobule vs duct	-0.209849	0.545963	0.975314	NS or Estimate < 0.5
NUDT22	lobule vs duct	-0.593317	0.0834145	0.879448	NS or Estimate < 0.5
ARHGEF3	lobule vs duct	0.198826	0.638942	0.978398	NS or Estimate < 0.5
REPS1	lobule vs duct	0.223536	0.56591	0.977041	NS or Estimate < 0.5
SPIRE1	lobule vs duct	0.504925	0.179753	0.914522	NS or Estimate < 0.5
NCS1	lobule vs duct	-0.226738	0.512333	0.969961	NS or Estimate < 0.5
TOMM40	lobule vs duct	0.569206	0.232691	0.929074	NS or Estimate < 0.5
ENTPD4	lobule vs duct	-0.650491	0.0890759	0.879448	NS or Estimate < 0.5
NAF1	lobule vs duct	-0.38144	0.423446	0.958249	NS or Estimate < 0.5
SYNPO2	lobule vs duct	0.580266	0.146306	0.895684	NS or Estimate < 0.5
AEBP1	lobule vs duct	-0.170277	0.741454	0.983929	NS or Estimate < 0.5
NSDHL	lobule vs duct	0.263822	0.491188	0.968236	NS or Estimate < 0.5
INSYN2B	lobule vs duct	0.198826	0.663671	0.97862	NS or Estimate < 0.5
SYTL4	lobule vs duct	-0.387727	0.432179	0.958249	NS or Estimate < 0.5
KRBOX4	lobule vs duct	0.18848	0.584075	0.977041	NS or Estimate < 0.5
GASK1A	lobule vs duct	-0.196979	0.551787	0.975314	NS or Estimate < 0.5
CLEC12B	lobule vs duct	0.345707	0.31504	0.947181	NS or Estimate < 0.5
SLC9A3R2	lobule vs duct	0.0786466	0.843473	0.988336	NS or Estimate < 0.5
ANKRD33	lobule vs duct	0.421048	0.271933	0.941359	NS or Estimate < 0.5
ATP6V0A1	lobule vs duct	-0.584742	0.0597231	0.849867	NS or Estimate < 0.5
ZNF562	lobule vs duct	-0.245619	0.477998	0.964543	NS or Estimate < 0.5
SHC1	lobule vs duct	0.662151	0.123405	0.888435	NS or Estimate < 0.5
DOCK9	lobule vs duct	0.0877148	0.766712	0.984172	NS or Estimate < 0.5
ATF7	lobule vs duct	-0.423717	0.334824	0.948223	NS or Estimate < 0.5
PLD1	lobule vs duct	0.510754	0.207029	0.926166	NS or Estimate < 0.5
PLXNB1	lobule vs duct	-0.592039	0.16057	0.90165	NS or Estimate < 0.5
ABHD17A	lobule vs duct	-0.16998	0.653893	0.97862	NS or Estimate < 0.5
ERAP2	lobule vs duct	0.626381	0.178204	0.914522	NS or Estimate < 0.5
LTBP3	lobule vs duct	-0.641423	0.110154	0.885803	NS or Estimate < 0.5
YAP1	lobule vs duct	0.239111	0.584809	0.977041	NS or Estimate < 0.5
MYO1B	lobule vs duct	-0.224214	0.499762	0.969783	NS or Estimate < 0.5
DNAJA4	lobule vs duct	0.662151	0.233728	0.929074	NS or Estimate < 0.5
ACAA1	lobule vs duct	-0.782294	0.0535715	0.847632	NS or Estimate < 0.5
SMARCC2	lobule vs duct	0.222222	0.609826	0.978398	NS or Estimate < 0.5
C15orf62	lobule vs duct	-0.0130508	0.975621	0.99599	NS or Estimate < 0.5
THAP5	lobule vs duct	0.670686	0.0725015	0.870337	NS or Estimate < 0.5
ERICH4	lobule vs duct	0.00582971	0.98272	0.99599	NS or Estimate < 0.5
AP1M1	lobule vs duct	-0.342782	0.455426	0.961954	NS or Estimate < 0.5
SPAG9	lobule vs duct	-0.140337	0.735164	0.982229	NS or Estimate < 0.5
EIF4E	lobule vs duct	-0.432071	0.246752	0.931854	NS or Estimate < 0.5
GUCY1A1	lobule vs duct	-0.5205	0.0790499	0.879448	NS or Estimate < 0.5
HMGB2	lobule vs duct	-0.245619	0.461699	0.962672	NS or Estimate < 0.5
RUFY3	lobule vs duct	-0.0616906	0.871432	0.991267	NS or Estimate < 0.5
AHCYL2	lobule vs duct	0.200817	0.556048	0.975755	NS or Estimate < 0.5
IFT22	lobule vs duct	0.52633	0.234535	0.929074	NS or Estimate < 0.5
RTCA	lobule vs duct	0.263822	0.515657	0.969961	NS or Estimate < 0.5
PITPNM1	lobule vs duct	0.730088	0.311676	0.947181	NS or Estimate < 0.5
CAB39	lobule vs duct	0.316481	0.330184	0.948223	NS or Estimate < 0.5
CBLC	lobule vs duct	-0.479123	0.488345	0.966712	NS or Estimate < 0.5
PPIP5K1	lobule vs duct	0.121457	0.777989	0.984172	NS or Estimate < 0.5
CLDN5	lobule vs duct	-0.144853	0.69424	0.979679	NS or Estimate < 0.5
PWWP2A	lobule vs duct	-0.344393	0.355626	0.954548	NS or Estimate < 0.5
DMRT2	lobule vs duct	-0.115627	0.65086	0.97862	NS or Estimate < 0.5
SUGT1	lobule vs duct	-0.332436	0.533168	0.971549	NS or Estimate < 0.5
RABL2B	lobule vs duct	-0.43609	0.237527	0.929074	NS or Estimate < 0.5
NEMP1	lobule vs duct	-0.163733	0.665354	0.97862	NS or Estimate < 0.5
SUN1	lobule vs duct	-0.245619	0.506775	0.969783	NS or Estimate < 0.5
ZNF385A	lobule vs duct	0.532159	0.134584	0.895684	NS or Estimate < 0.5
NSMF	lobule vs duct	0.309937	0.503372	0.969783	NS or Estimate < 0.5
CRISP1	lobule vs duct	-0.438615	0.253155	0.93397	NS or Estimate < 0.5
TMEM131L	lobule vs duct	-0.00700109	0.99039	0.99599	NS or Estimate < 0.5
SATB1	lobule vs duct	-0.346384	0.378301	0.958249	NS or Estimate < 0.5
PEX5	lobule vs duct	-0.141051	0.777577	0.984172	NS or Estimate < 0.5
AP3M2	lobule vs duct	-0.205333	0.501959	0.969783	NS or Estimate < 0.5
PRR22	lobule vs duct	0.181937	0.531812	0.971549	NS or Estimate < 0.5
STRIP2	lobule vs duct	0.421048	0.354524	0.954149	NS or Estimate < 0.5
PSMG3	lobule vs duct	-0.451765	0.141254	0.895684	NS or Estimate < 0.5
RBM20	lobule vs duct	-0.673174	0.0951496	0.879448	NS or Estimate < 0.5
SLC6A6	lobule vs duct	-0.37561	0.350587	0.953059	NS or Estimate < 0.5
TBC1D5	lobule vs duct	-0.467841	0.170773	0.907705	NS or Estimate < 0.5
ZDHHC4	lobule vs duct	-0.306813	0.429536	0.958249	NS or Estimate < 0.5
C7orf50	lobule vs duct	-0.163733	0.691161	0.979679	NS or Estimate < 0.5
VAV2	lobule vs duct	-0.245619	0.509916	0.969961	NS or Estimate < 0.5
CDV3	lobule vs duct	0.566979	0.181139	0.915918	NS or Estimate < 0.5
AZI2	lobule vs duct	0.488035	0.103884	0.885803	NS or Estimate < 0.5
IQCG	lobule vs duct	0.374933	0.329691	0.948223	NS or Estimate < 0.5
LSMEM1	lobule vs duct	0.408178	0.33911	0.94863	NS or Estimate < 0.5
GSE1	lobule vs duct	-0.199503	0.565741	0.977041	NS or Estimate < 0.5
LRRC8B	lobule vs duct	0.450988	0.302305	0.947181	NS or Estimate < 0.5
LRRC8D	lobule vs duct	0.211163	0.578438	0.977041	NS or Estimate < 0.5
TOMM6	lobule vs duct	-0.364551	0.279866	0.947181	NS or Estimate < 0.5
AFAP1	lobule vs duct	-0.0864008	0.834938	0.988336	NS or Estimate < 0.5
ZNF213	lobule vs duct	0.444444	0.366302	0.956368	NS or Estimate < 0.5
HOGA1	lobule vs duct	0.174116	0.702907	0.980141	NS or Estimate < 0.5
DERL1	lobule vs duct	-0.00451578	0.991531	0.99599	NS or Estimate < 0.5
NFIA	lobule vs duct	0.152711	0.660616	0.97862	NS or Estimate < 0.5
OST4	lobule vs duct	0.152413	0.757958	0.983929	NS or Estimate < 0.5
SARDH	lobule vs duct	-0.132895	0.50132	0.969783	NS or Estimate < 0.5
DEK	lobule vs duct	0.116941	0.756565	0.983929	NS or Estimate < 0.5
ARFRP1	lobule vs duct	-0.776881	0.0113823	0.739922	P < 0.05
KLC2	lobule vs duct	-0.00853507	0.982988	0.99599	NS or Estimate < 0.5
HYLS1	lobule vs duct	-0.308623	0.38763	0.958249	NS or Estimate < 0.5
AHI1	lobule vs duct	-0.291734	0.450332	0.958249	NS or Estimate < 0.5
PPP1R18	lobule vs duct	0.18848	0.605518	0.978398	NS or Estimate < 0.5
RTL1	lobule vs duct	-0.122171	0.780586	0.984172	NS or Estimate < 0.5
FERMT2	lobule vs duct	-0.614722	0.0847125	0.879448	NS or Estimate < 0.5
ELMOD3	lobule vs duct	-0.0760554	0.858955	0.99056	NS or Estimate < 0.5
JDP2	lobule vs duct	0.051945	0.883959	0.991584	NS or Estimate < 0.5
DNAJA3	lobule vs duct	-1.02087	0.00835808	0.704963	P < 0.05
CCDC36	lobule vs duct	-0.306099	0.399564	0.958249	NS or Estimate < 0.5
FKBP6	lobule vs duct	0.620551	0.0885988	0.879448	NS or Estimate < 0.5
TAF12	lobule vs duct	0.439929	0.0591867	0.849867	NS or Estimate < 0.5
NDRG1	lobule vs duct	-0.0065071	0.985726	0.99599	NS or Estimate < 0.5
PAX7	lobule vs duct	-0.207324	0.576598	0.977041	NS or Estimate < 0.5
HSF2	lobule vs duct	-0.42425	0.332172	0.948223	NS or Estimate < 0.5
SMIM13	lobule vs duct	-0.425745	0.316809	0.947181	NS or Estimate < 0.5
C5orf24	lobule vs duct	-0.235273	0.442069	0.958249	NS or Estimate < 0.5
GDAP2	lobule vs duct	0.567929	0.139681	0.895684	NS or Estimate < 0.5
CLHC1	lobule vs duct	0.0481432	0.873189	0.991267	NS or Estimate < 0.5
ARHGAP26	lobule vs duct	-0.513956	0.190865	0.916644	NS or Estimate < 0.5
PIP5K1A	lobule vs duct	-0.0317505	0.946421	0.995249	NS or Estimate < 0.5
INPP5K	lobule vs duct	0.031254	0.926214	0.994008	NS or Estimate < 0.5
PTPRK	lobule vs duct	0.14489	0.717631	0.980141	NS or Estimate < 0.5
EIF2AK2	lobule vs duct	-0.0130508	0.963968	0.99599	NS or Estimate < 0.5
PABPC4	lobule vs duct	-0.0987377	0.806662	0.98763	NS or Estimate < 0.5
MSRA	lobule vs duct	-1.27104	0.000696664	0.45898	P < 0.05
ATL2	lobule vs duct	0.601174	0.180137	0.914522	NS or Estimate < 0.5
SMIM19	lobule vs duct	0.1696	0.666445	0.97862	NS or Estimate < 0.5
DERL3	lobule vs duct	-0.855824	0.0184386	0.775073	P < 0.05
ECD	lobule vs duct	0.10912	0.723646	0.980141	NS or Estimate < 0.5
RPN2	lobule vs duct	-0.287218	0.357891	0.954548	NS or Estimate < 0.5
LRP5L	lobule vs duct	-0.140337	0.757832	0.983929	NS or Estimate < 0.5
ZBTB43	lobule vs duct	0.0337785	0.905402	0.991584	NS or Estimate < 0.5
FDPS	lobule vs duct	0.28223	0.626218	0.978398	NS or Estimate < 0.5
RNF185	lobule vs duct	-0.660837	0.0634503	0.849867	NS or Estimate < 0.5
POSTN	lobule vs duct	0.0247103	0.941387	0.994803	NS or Estimate < 0.5
MYOT	lobule vs duct	-0.151397	0.666939	0.97862	NS or Estimate < 0.5
GKAP1	lobule vs duct	-0.392499	0.349377	0.953059	NS or Estimate < 0.5
TRPC4	lobule vs duct	-0.38144	0.364772	0.956368	NS or Estimate < 0.5
NDUFB11	lobule vs duct	-0.105281	0.765869	0.984172	NS or Estimate < 0.5
ABL2	lobule vs duct	-0.0526224	0.909051	0.991584	NS or Estimate < 0.5
C2CD4D	lobule vs duct	-0.392499	0.371616	0.956368	NS or Estimate < 0.5
NFATC4	lobule vs duct	-0.148872	0.693073	0.979679	NS or Estimate < 0.5
PUF60	lobule vs duct	-0.308235	0.188606	0.915918	NS or Estimate < 0.5
TRMT1	lobule vs duct	-0.0233963	0.951703	0.995249	NS or Estimate < 0.5
ZNF692	lobule vs duct	-0.0773326	0.853928	0.99056	NS or Estimate < 0.5
LIMS2	lobule vs duct	-0.503611	0.229523	0.929074	NS or Estimate < 0.5
ZNF415	lobule vs duct	1.03651	0.210168	0.929074	NS or Estimate < 0.5
LRIG3	lobule vs duct	0.152711	0.681682	0.979679	NS or Estimate < 0.5
COLCA2	lobule vs duct	-0.0780467	0.83124	0.988336	NS or Estimate < 0.5
BEAN1	lobule vs duct	-0.807718	0.00551593	0.677763	P < 0.05
R3HCC1	lobule vs duct	-0.0103455	0.981076	0.99599	NS or Estimate < 0.5
FBXO28	lobule vs duct	0.179945	0.637923	0.978398	NS or Estimate < 0.5
SLF2	lobule vs duct	-0.445158	0.19768	0.917019	NS or Estimate < 0.5
ALG1L2	lobule vs duct	-0.0233963	0.946757	0.995249	NS or Estimate < 0.5
OTUD5	lobule vs duct	-0.610206	0.178153	0.914522	NS or Estimate < 0.5
HSBP1L1	lobule vs duct	0.135821	0.680056	0.979679	NS or Estimate < 0.5
LAX1	lobule vs duct	0.393813	0.36821	0.956368	NS or Estimate < 0.5
FZR1	lobule vs duct	-0.0226823	0.955289	0.995249	NS or Estimate < 0.5
GRAMD1A	lobule vs duct	0.0123735	0.974113	0.99599	NS or Estimate < 0.5
BORCS7	lobule vs duct	-1.39652	0.0203011	0.775073	P < 0.05
RCOR3	lobule vs duct	0.181937	0.524804	0.969961	NS or Estimate < 0.5
ATXN7L3B	lobule vs duct	-0.222222	0.461043	0.962672	NS or Estimate < 0.5
IFFO2	lobule vs duct	-0.725833	0.019741	0.775073	P < 0.05
DAZAP2	lobule vs duct	-0.790829	0.1113	0.885803	NS or Estimate < 0.5
AKIRIN1	lobule vs duct	0.0831624	0.785961	0.984172	NS or Estimate < 0.5
ANP32E	lobule vs duct	0.181937	0.669104	0.97862	NS or Estimate < 0.5
C19orf38	lobule vs duct	0.282702	0.517715	0.969961	NS or Estimate < 0.5
C1orf198	lobule vs duct	0.0622905	0.836084	0.988336	NS or Estimate < 0.5
BTF3L4	lobule vs duct	0.0688342	0.815398	0.98763	NS or Estimate < 0.5
ZNF841	lobule vs duct	0.293048	0.351558	0.953059	NS or Estimate < 0.5
ZNF844	lobule vs duct	-0.148872	0.757585	0.983929	NS or Estimate < 0.5
SYT2	lobule vs duct	-0.45298	0.221884	0.929074	NS or Estimate < 0.5
BTBD19	lobule vs duct	0.0773693	0.857191	0.99056	NS or Estimate < 0.5
ACAD10	lobule vs duct	-0.503611	0.173637	0.911891	NS or Estimate < 0.5
TLK1	lobule vs duct	-0.337849	0.435328	0.958249	NS or Estimate < 0.5
ZAR1L	lobule vs duct	-0.0481066	0.873072	0.991267	NS or Estimate < 0.5
LRRFIP1	lobule vs duct	0.0415995	0.882706	0.991584	NS or Estimate < 0.5
TMEM151B	lobule vs duct	-0.378915	0.521203	0.969961	NS or Estimate < 0.5
ILF3	lobule vs duct	0.0877148	0.777353	0.984172	NS or Estimate < 0.5
ATXN1L	lobule vs duct	-0.0526224	0.881683	0.991584	NS or Estimate < 0.5
SVOPL	lobule vs duct	-0.389975	0.276381	0.945496	NS or Estimate < 0.5
BCAP31	lobule vs duct	0.128	0.796998	0.98566	NS or Estimate < 0.5
CNST	lobule vs duct	-0.0233963	0.957276	0.99529	NS or Estimate < 0.5
ALOX15	lobule vs duct	-0.164448	0.702695	0.980141	NS or Estimate < 0.5
ATP13A2	lobule vs duct	0.0708255	0.865191	0.99056	NS or Estimate < 0.5
TP53BP1	lobule vs duct	-0.170277	0.700657	0.980141	NS or Estimate < 0.5
NIPA1	lobule vs duct	0.435413	0.2281	0.929074	NS or Estimate < 0.5
RNASEH2B	lobule vs duct	-0.378135	0.343438	0.950538	NS or Estimate < 0.5
SEMA4D	lobule vs duct	-0.568606	0.149475	0.895684	NS or Estimate < 0.5
EMC8	lobule vs duct	-0.0402856	0.932286	0.994385	NS or Estimate < 0.5
MGRN1	lobule vs duct	0.217706	0.55329	0.975314	NS or Estimate < 0.5
ARFGAP3	lobule vs duct	-0.0267016	0.924344	0.99376	NS or Estimate < 0.5
SPART	lobule vs duct	-0.421725	0.363457	0.956264	NS or Estimate < 0.5
TMEM169	lobule vs duct	0.192996	0.633699	0.978398	NS or Estimate < 0.5
DMTF1	lobule vs duct	-0.00451578	0.98951	0.99599	NS or Estimate < 0.5
THOC6	lobule vs duct	-0.396301	0.30832	0.947181	NS or Estimate < 0.5
NEDD9	lobule vs duct	0.228052	0.545763	0.975314	NS or Estimate < 0.5
CTIF	lobule vs duct	-0.668658	0.0816668	0.879448	NS or Estimate < 0.5
MORF4L2	lobule vs duct	-0.0702256	0.857827	0.99056	NS or Estimate < 0.5
EDC3	lobule vs duct	-0.79463	0.0215579	0.78677	P < 0.05
HES4	lobule vs duct	0.396338	0.416446	0.958249	NS or Estimate < 0.5
BMERB1	lobule vs duct	-0.252656	0.416394	0.958249	NS or Estimate < 0.5
INTS12	lobule vs duct	-0.262508	0.387574	0.958249	NS or Estimate < 0.5
NREP	lobule vs duct	0.217706	0.701108	0.980141	NS or Estimate < 0.5
FLYWCH2	lobule vs duct	-0.0591661	0.894014	0.991584	NS or Estimate < 0.5
SLC35B3	lobule vs duct	-0.256678	0.575522	0.977041	NS or Estimate < 0.5
CPSF7	lobule vs duct	-0.453893	0.244208	0.931251	NS or Estimate < 0.5
BBX	lobule vs duct	0.0708255	0.82622	0.988336	NS or Estimate < 0.5
ZNF780A	lobule vs duct	0.475698	0.38761	0.958249	NS or Estimate < 0.5
NFYC	lobule vs duct	0.00582971	0.988205	0.99599	NS or Estimate < 0.5
ITPK1	lobule vs duct	-0.00199132	0.996371	0.997801	NS or Estimate < 0.5
EFTUD2	lobule vs duct	-0.255964	0.421179	0.958249	NS or Estimate < 0.5
TGFBRAP1	lobule vs duct	0.328818	0.278914	0.947181	NS or Estimate < 0.5
PIK3R5	lobule vs duct	0.651805	0.157707	0.899077	NS or Estimate < 0.5
TNRC6C	lobule vs duct	-0.00451578	0.988481	0.99599	NS or Estimate < 0.5
HNRNPLL	lobule vs duct	-0.0546503	0.904078	0.991584	NS or Estimate < 0.5
PTGES3L	lobule vs duct	0.356052	0.202312	0.922212	NS or Estimate < 0.5
ATG13	lobule vs duct	-0.248143	0.585847	0.977041	NS or Estimate < 0.5
CHID1	lobule vs duct	0.263822	0.529369	0.971005	NS or Estimate < 0.5
ARHGAP32	lobule vs duct	-0.134507	0.760296	0.983989	NS or Estimate < 0.5
FAM111B	lobule vs duct	-0.554659	0.433531	0.958249	NS or Estimate < 0.5
ERI2	lobule vs duct	0.106595	0.719422	0.980141	NS or Estimate < 0.5
HSD3B7	lobule vs duct	0.217706	0.530217	0.971005	NS or Estimate < 0.5
C17orf49	lobule vs duct	-0.0422769	0.909097	0.991584	NS or Estimate < 0.5
SLC6A8	lobule vs duct	-0.440606	0.255868	0.936148	NS or Estimate < 0.5
PIEZO1	lobule vs duct	0.163056	0.401891	0.958249	NS or Estimate < 0.5
API5	lobule vs duct	-0.335325	0.364523	0.956368	NS or Estimate < 0.5
AMIGO2	lobule vs duct	0.404159	0.487472	0.966712	NS or Estimate < 0.5
MPC2	lobule vs duct	-0.421725	0.217071	0.929074	NS or Estimate < 0.5
FAM13C	lobule vs duct	0.521814	0.110523	0.885803	NS or Estimate < 0.5
CTDNEP1	lobule vs duct	-0.81753	0.0973842	0.879448	NS or Estimate < 0.5
SLC25A39	lobule vs duct	-0.438615	0.122413	0.888435	NS or Estimate < 0.5
TPCN1	lobule vs duct	0.0773693	0.826536	0.988336	NS or Estimate < 0.5
MAPRE2	lobule vs duct	0.051945	0.839305	0.988336	NS or Estimate < 0.5
HRH4	lobule vs duct	-0.209849	0.662933	0.97862	NS or Estimate < 0.5
CCDC68	lobule vs duct	-0.416496	0.395229	0.958249	NS or Estimate < 0.5
LEUTX	lobule vs duct	-0.404836	0.157052	0.898798	NS or Estimate < 0.5
NOX4	lobule vs duct	0.152711	0.760809	0.983989	NS or Estimate < 0.5
TCTN2	lobule vs duct	-0.645057	0.225306	0.929074	NS or Estimate < 0.5
TCHP	lobule vs duct	-0.704428	0.0881796	0.879448	NS or Estimate < 0.5
RPH3A	lobule vs duct	0.350223	0.333398	0.948223	NS or Estimate < 0.5
BSDC1	lobule vs duct	0.339877	0.444282	0.958249	NS or Estimate < 0.5
TMEM30A	lobule vs duct	-0.267169	0.0591994	0.849867	NS or Estimate < 0.5
CAPN8	lobule vs duct	-0.37561	0.36636	0.956368	NS or Estimate < 0.5
TBC1D7	lobule vs duct	-0.0883922	0.846874	0.988566	NS or Estimate < 0.5
UBTFL1	lobule vs duct	-0.335325	0.178369	0.914522	NS or Estimate < 0.5
NDE1	lobule vs duct	-0.226738	0.516286	0.969961	NS or Estimate < 0.5
BANF1	lobule vs duct	0.0148979	0.964091	0.99599	NS or Estimate < 0.5
TLE6	lobule vs duct	0.0512508	0.890163	0.991584	NS or Estimate < 0.5
NBPF6	lobule vs duct	0.299592	0.479231	0.965229	NS or Estimate < 0.5
WRAP53	lobule vs duct	-0.0155753	0.970069	0.99599	NS or Estimate < 0.5
AMFR	lobule vs duct	0.202628	0.585096	0.977041	NS or Estimate < 0.5
TMX2	lobule vs duct	-0.291734	0.310915	0.947181	NS or Estimate < 0.5
NHSL1	lobule vs duct	0.802488	0.0392725	0.824786	P < 0.05
COPB1	lobule vs duct	0.228052	0.534241	0.971549	NS or Estimate < 0.5
ABCC3	lobule vs duct	0.0630045	0.872412	0.991267	NS or Estimate < 0.5
LDHAL6A	lobule vs duct	-0.300269	0.407786	0.958249	NS or Estimate < 0.5
DET1	lobule vs duct	0.263822	0.319434	0.947181	NS or Estimate < 0.5
PHLDB1	lobule vs duct	0.160532	0.605609	0.978398	NS or Estimate < 0.5
TLE2	lobule vs duct	-0.124162	0.749706	0.983929	NS or Estimate < 0.5
DENND4A	lobule vs duct	-0.205333	0.472481	0.964543	NS or Estimate < 0.5
VSTM5	lobule vs duct	-0.421725	0.272239	0.941359	NS or Estimate < 0.5
DOK3	lobule vs duct	-0.111491	0.743154	0.983929	NS or Estimate < 0.5
IMPA1	lobule vs duct	-0.625067	0.11761	0.888435	NS or Estimate < 0.5
MBIP	lobule vs duct	0.00582971	0.987702	0.99599	NS or Estimate < 0.5
MIEF2	lobule vs duct	-0.0669872	0.835761	0.988336	NS or Estimate < 0.5
NKIRAS2	lobule vs duct	-0.329495	0.316313	0.947181	NS or Estimate < 0.5
MYL12B	lobule vs duct	0.176994	0.603566	0.978398	NS or Estimate < 0.5
MTHFD2L	lobule vs duct	-0.170277	0.624289	0.978398	NS or Estimate < 0.5
CCDC169	lobule vs duct	0.282702	0.405466	0.958249	NS or Estimate < 0.5
ANG	lobule vs duct	-0.199503	0.524736	0.969961	NS or Estimate < 0.5
MUC7	lobule vs duct	-0.218384	0.5332	0.971549	NS or Estimate < 0.5
BTN3A1	lobule vs duct	-0.991646	0.00717683	0.700719	P < 0.05
SCRN2	lobule vs duct	0.367112	0.357288	0.954548	NS or Estimate < 0.5
PLET1	lobule vs duct	-0.402845	0.441029	0.958249	NS or Estimate < 0.5
PTPRQ	lobule vs duct	0.00582971	0.986711	0.99599	NS or Estimate < 0.5
IQCF5	lobule vs duct	0.0584887	0.893552	0.991584	NS or Estimate < 0.5
COG6	lobule vs duct	0.288532	0.524488	0.969961	NS or Estimate < 0.5
ZNF619	lobule vs duct	0.0539363	0.890478	0.991584	NS or Estimate < 0.5
RRP12	lobule vs duct	-0.165761	0.745977	0.983929	NS or Estimate < 0.5
CAPN14	lobule vs duct	-0.0949359	0.813386	0.98763	NS or Estimate < 0.5
SLC1A5	lobule vs duct	-0.37561	0.235405	0.929074	NS or Estimate < 0.5
CRHR1	lobule vs duct	-0.742062	0.108659	0.885803	NS or Estimate < 0.5
UBE2QL1	lobule vs duct	-0.482206	0.289916	0.947181	NS or Estimate < 0.5
FAM200B	lobule vs duct	0.309937	0.431891	0.958249	NS or Estimate < 0.5
KIAA1671	lobule vs duct	-0.503611	0.0773559	0.87822	NS or Estimate < 0.5
ANKRD65	lobule vs duct	-0.0591661	0.882101	0.991584	NS or Estimate < 0.5
SLCO2B1	lobule vs duct	0.374933	0.312886	0.947181	NS or Estimate < 0.5
SP9	lobule vs duct	-0.500085	0.152368	0.895684	NS or Estimate < 0.5
LAMTOR2	lobule vs duct	-0.245619	0.573909	0.977041	NS or Estimate < 0.5
FAM185A	lobule vs duct	-0.633602	0.0839451	0.879448	NS or Estimate < 0.5
NGLY1	lobule vs duct	-0.597832	0.00893688	0.71641	P < 0.05
EXOC7	lobule vs duct	-0.618027	0.179468	0.914522	NS or Estimate < 0.5
IQCN	lobule vs duct	-0.310614	0.36668	0.956368	NS or Estimate < 0.5
ETV3	lobule vs duct	-0.423704	0.05439	0.847632	NS or Estimate < 0.5
UBE2Q2	lobule vs duct	-0.142328	0.711233	0.980141	NS or Estimate < 0.5
MDM2	lobule vs duct	0.115664	0.704274	0.980141	NS or Estimate < 0.5
ZNF566	lobule vs duct	-0.142328	0.690009	0.979679	NS or Estimate < 0.5
ZNF576	lobule vs duct	-0.578952	0.139594	0.895684	NS or Estimate < 0.5
IPP	lobule vs duct	-0.281388	0.532308	0.971549	NS or Estimate < 0.5
ELF1	lobule vs duct	-0.64888	0.313309	0.947181	NS or Estimate < 0.5
MKLN1	lobule vs duct	0.171174	0.683445	0.979679	NS or Estimate < 0.5
PTPN3	lobule vs duct	-0.310614	0.408747	0.958249	NS or Estimate < 0.5
TSEN2	lobule vs duct	-0.790829	0.0562587	0.847632	NS or Estimate < 0.5
CCDC110	lobule vs duct	-1.00854	0.00800795	0.700719	P < 0.05
TMEM205	lobule vs duct	0.282702	0.530875	0.971005	NS or Estimate < 0.5
MSL2	lobule vs duct	-0.264499	0.374939	0.956915	NS or Estimate < 0.5
TTC28	lobule vs duct	0.493865	0.154335	0.895684	NS or Estimate < 0.5
NR1D2	lobule vs duct	0.52633	0.120676	0.888435	NS or Estimate < 0.5
ZNF880	lobule vs duct	-0.568606	0.0782106	0.879448	NS or Estimate < 0.5
SCAF4	lobule vs duct	-0.974757	0.000585033	0.45898	P < 0.05
ZNF200	lobule vs duct	0.0980603	0.747226	0.983929	NS or Estimate < 0.5
SCRN1	lobule vs duct	-0.421725	0.231042	0.929074	NS or Estimate < 0.5
YPEL3	lobule vs duct	-0.501086	0.220695	0.929074	NS or Estimate < 0.5
ZSCAN18	lobule vs duct	-0.369066	0.250187	0.93397	NS or Estimate < 0.5
TRIM45	lobule vs duct	0.051945	0.904615	0.991584	NS or Estimate < 0.5
APH1B	lobule vs duct	0.475698	0.265096	0.941359	NS or Estimate < 0.5
ZNF529	lobule vs duct	-0.122171	0.788326	0.984301	NS or Estimate < 0.5
CTAGE9	lobule vs duct	-0.129992	0.685809	0.979679	NS or Estimate < 0.5
RFX8	lobule vs duct	-0.224214	0.593182	0.977041	NS or Estimate < 0.5
GLG1	lobule vs duct	-0.35673	0.188537	0.915918	NS or Estimate < 0.5
SORBS2	lobule vs duct	0.293048	0.396304	0.958249	NS or Estimate < 0.5
NUPR2	lobule vs duct	-0.206047	0.678136	0.979679	NS or Estimate < 0.5
CT47B1	lobule vs duct	-0.167973	0.499941	0.969783	NS or Estimate < 0.5
FKBP5	lobule vs duct	-0.457495	0.243925	0.931251	NS or Estimate < 0.5
BORCS8	lobule vs duct	0.152711	0.706532	0.980141	NS or Estimate < 0.5
SH2B1	lobule vs duct	-0.327504	0.390544	0.958249	NS or Estimate < 0.5
MTFR1	lobule vs duct	0.477822	0.462603	0.962672	NS or Estimate < 0.5
SCAPER	lobule vs duct	-0.161742	0.578074	0.977041	NS or Estimate < 0.5
SLC13A2	lobule vs duct	-0.285904	0.483178	0.966712	NS or Estimate < 0.5
TJAP1	lobule vs duct	0.797972	0.0373579	0.824123	P < 0.05
GORAB	lobule vs duct	-0.0337418	0.940893	0.994781	NS or Estimate < 0.5
GLRA1	lobule vs duct	-0.231967	0.579807	0.977041	NS or Estimate < 0.5
HSDL1	lobule vs duct	0.382754	0.464603	0.962672	NS or Estimate < 0.5
CLDN14	lobule vs duct	-0.0481066	0.920514	0.992772	NS or Estimate < 0.5
FAN1	lobule vs duct	0.123485	0.776371	0.984172	NS or Estimate < 0.5
PTGR1	lobule vs duct	-0.382154	0.345074	0.951352	NS or Estimate < 0.5
FAM25A	lobule vs duct	0.198826	0.556656	0.975755	NS or Estimate < 0.5
TRIM77	lobule vs duct	-0.188444	0.638586	0.978398	NS or Estimate < 0.5
ZNF407	lobule vs duct	0.234596	0.557576	0.975755	NS or Estimate < 0.5
PIP4K2C	lobule vs duct	-0.161742	0.672563	0.979679	NS or Estimate < 0.5
GPR85	lobule vs duct	-0.134507	0.636745	0.978398	NS or Estimate < 0.5
TCF7L2	lobule vs duct	-0.027615	0.945019	0.995249	NS or Estimate < 0.5
SRP54	lobule vs duct	-0.0760554	0.837862	0.988336	NS or Estimate < 0.5
P3H1	lobule vs duct	-0.124162	0.735373	0.982229	NS or Estimate < 0.5
MYOCD	lobule vs duct	-0.503611	0.316407	0.947181	NS or Estimate < 0.5
SPSB2	lobule vs duct	0.792143	0.0389358	0.824123	P < 0.05
GRAMD2B	lobule vs duct	0.350223	0.363511	0.956264	NS or Estimate < 0.5
TMEM88B	lobule vs duct	-0.00199132	0.995407	0.997801	NS or Estimate < 0.5
KDM4C	lobule vs duct	-0.93771	0.00911883	0.71641	P < 0.05
RBM19	lobule vs duct	-0.00782104	0.980242	0.99599	NS or Estimate < 0.5
ANK3	lobule vs duct	-0.367075	0.381235	0.958249	NS or Estimate < 0.5
ANPEP	lobule vs duct	0.385278	0.332543	0.948223	NS or Estimate < 0.5
ANXA4	lobule vs duct	-0.0233963	0.933734	0.994385	NS or Estimate < 0.5
ANXA5	lobule vs duct	0.100052	0.776365	0.984172	NS or Estimate < 0.5
SEPTIN12	lobule vs duct	-0.48473	0.164434	0.90165	NS or Estimate < 0.5
ANXA6	lobule vs duct	-0.199503	0.667964	0.97862	NS or Estimate < 0.5
ANXA7	lobule vs duct	-0.170277	0.725729	0.9805	NS or Estimate < 0.5
ZNF716	lobule vs duct	-0.352928	0.318581	0.947181	NS or Estimate < 0.5
MTHFSD	lobule vs duct	-0.0695116	0.797676	0.98566	NS or Estimate < 0.5
ZNF727	lobule vs duct	0.13383	0.691753	0.979679	NS or Estimate < 0.5
BIVM	lobule vs duct	-0.421725	0.302902	0.947181	NS or Estimate < 0.5
SH3YL1	lobule vs duct	-0.209849	0.609122	0.978398	NS or Estimate < 0.5
MCTP2	lobule vs duct	0.0877148	0.802465	0.986748	NS or Estimate < 0.5
SYNCRIP	lobule vs duct	0.356052	0.410376	0.958249	NS or Estimate < 0.5
BUD13	lobule vs duct	-0.820055	0.0170686	0.775073	P < 0.05
CANT1	lobule vs duct	0.116941	0.749855	0.983929	NS or Estimate < 0.5
EVI5L	lobule vs duct	-0.20696	0.638189	0.978398	NS or Estimate < 0.5
EPS15	lobule vs duct	-0.4789	0.285463	0.947181	NS or Estimate < 0.5
CLDN10	lobule vs duct	-0.317158	0.449846	0.958249	NS or Estimate < 0.5
C15orf40	lobule vs duct	0.129314	0.858741	0.99056	NS or Estimate < 0.5
MGAT4A	lobule vs duct	0.123485	0.662836	0.97862	NS or Estimate < 0.5
SLC25A13	lobule vs duct	-0.115627	0.738958	0.982942	NS or Estimate < 0.5
RNF170	lobule vs duct	-0.37561	0.243121	0.931251	NS or Estimate < 0.5
SPG11	lobule vs duct	0.358044	0.214129	0.929074	NS or Estimate < 0.5
SETD6	lobule vs duct	-0.428269	0.222313	0.929074	NS or Estimate < 0.5
TRAPPC9	lobule vs duct	0.0415995	0.926109	0.994008	NS or Estimate < 0.5
POLR3B	lobule vs duct	0.198826	0.63157	0.978398	NS or Estimate < 0.5
NPTN	lobule vs duct	-0.289209	0.383318	0.958249	NS or Estimate < 0.5
CYB561A3	lobule vs duct	0.309937	0.382742	0.958249	NS or Estimate < 0.5
JMJD4	lobule vs duct	-0.79282	0.0226827	0.795693	P < 0.05
PLEKHD1	lobule vs duct	-0.576427	0.21366	0.929074	NS or Estimate < 0.5
MAFF	lobule vs duct	-0.0299401	0.951455	0.995249	NS or Estimate < 0.5
SAMD4A	lobule vs duct	0.181937	0.642882	0.978398	NS or Estimate < 0.5
DUS3L	lobule vs duct	0.0415995	0.923624	0.993571	NS or Estimate < 0.5
KDM4E	lobule vs duct	0.303574	0.415574	0.958249	NS or Estimate < 0.5
WWC1	lobule vs duct	0.051945	0.902565	0.991584	NS or Estimate < 0.5
FXN	lobule vs duct	0.157226	0.653237	0.97862	NS or Estimate < 0.5
AHCY	lobule vs duct	-0.238214	0.600657	0.978398	NS or Estimate < 0.5
SPATA48	lobule vs duct	0.595164	0.152135	0.895684	NS or Estimate < 0.5
PDCD6IP	lobule vs duct	-0.0591661	0.881416	0.991584	NS or Estimate < 0.5
SH3D21	lobule vs duct	0.470766	0.138812	0.895684	NS or Estimate < 0.5
KIAA0040	lobule vs duct	0.0227189	0.94077	0.994781	NS or Estimate < 0.5
PLXNB3	lobule vs duct	0.222222	0.585675	0.977041	NS or Estimate < 0.5
PCYT1B	lobule vs duct	0.257278	0.493518	0.968564	NS or Estimate < 0.5
FBXL17	lobule vs duct	-0.216393	0.610525	0.978398	NS or Estimate < 0.5
CCDC120	lobule vs duct	0.339163	0.289278	0.947181	NS or Estimate < 0.5
RAB2B	lobule vs duct	0.13383	0.644613	0.978398	NS or Estimate < 0.5
FAM172A	lobule vs duct	-0.0967463	0.800197	0.986234	NS or Estimate < 0.5
ZNF580	lobule vs duct	-0.343679	0.407537	0.958249	NS or Estimate < 0.5
TWNK	lobule vs duct	-0.463325	0.182452	0.915918	NS or Estimate < 0.5
VSIG10L	lobule vs duct	0.0604801	0.861464	0.99056	NS or Estimate < 0.5
FAM170A	lobule vs duct	0.051945	0.842534	0.988336	NS or Estimate < 0.5
APBB1	lobule vs duct	0.0818851	0.827503	0.988336	NS or Estimate < 0.5
PPP6R3	lobule vs duct	0.0194137	0.963073	0.99599	NS or Estimate < 0.5
PLIN3	lobule vs duct	-0.298278	0.407037	0.958249	NS or Estimate < 0.5
DDHD2	lobule vs duct	-0.216393	0.589425	0.977041	NS or Estimate < 0.5
ODR4	lobule vs duct	0.0461153	0.930918	0.994385	NS or Estimate < 0.5
PRR29	lobule vs duct	0.131306	0.796381	0.98566	NS or Estimate < 0.5
TRAF3IP2	lobule vs duct	-0.92082	0.0199883	0.775073	P < 0.05
FLNB	lobule vs duct	0.051945	0.889351	0.991584	NS or Estimate < 0.5
BRD8	lobule vs duct	-0.170277	0.671513	0.979469	NS or Estimate < 0.5
MRGPRG	lobule vs duct	0.211163	0.495334	0.968564	NS or Estimate < 0.5
FAM180B	lobule vs duct	0.0141839	0.97085	0.99599	NS or Estimate < 0.5
MTF2	lobule vs duct	0.051945	0.902132	0.991584	NS or Estimate < 0.5
ARHGAP40	lobule vs duct	-0.300269	0.34991	0.953059	NS or Estimate < 0.5
SHISAL2B	lobule vs duct	0.532159	0.194977	0.916861	NS or Estimate < 0.5
C5orf63	lobule vs duct	-0.392499	0.253272	0.93397	NS or Estimate < 0.5
CFAP44	lobule vs duct	0.0474292	0.90032	0.991584	NS or Estimate < 0.5
IYD	lobule vs duct	0.744036	0.0572392	0.847632	NS or Estimate < 0.5
ZNF605	lobule vs duct	-0.180623	0.605448	0.978398	NS or Estimate < 0.5
ARHGAP4	lobule vs duct	0.217706	0.630486	0.978398	NS or Estimate < 0.5
NPAS3	lobule vs duct	0.263822	0.504886	0.969783	NS or Estimate < 0.5
ACIN1	lobule vs duct	-0.372008	0.306197	0.947181	NS or Estimate < 0.5
FXYD6	lobule vs duct	-0.721774	0.164228	0.90165	NS or Estimate < 0.5
TMEM41B	lobule vs duct	-0.018576	0.959159	0.995673	NS or Estimate < 0.5
HERC6	lobule vs duct	-0.0344559	0.932791	0.994385	NS or Estimate < 0.5
LDHA	lobule vs duct	-0.17944	0.694236	0.979679	NS or Estimate < 0.5
ZNF268	lobule vs duct	0.732976	0.0399328	0.826835	P < 0.05
MKS1	lobule vs duct	-0.641956	0.0999986	0.88229	NS or Estimate < 0.5
DAG1	lobule vs duct	0.263822	0.429075	0.958249	NS or Estimate < 0.5
STARD3	lobule vs duct	0.052659	0.901311	0.991584	NS or Estimate < 0.5
HES7	lobule vs duct	0.402168	0.245314	0.931251	NS or Estimate < 0.5
PROM2	lobule vs duct	0.217706	0.568094	0.977041	NS or Estimate < 0.5
BIRC2	lobule vs duct	-0.445158	0.28968	0.947181	NS or Estimate < 0.5
EPB41	lobule vs duct	-0.234559	0.454438	0.961293	NS or Estimate < 0.5
NDUFS2	lobule vs duct	-0.690063	0.0193366	0.775073	P < 0.05
HAUS4	lobule vs duct	-0.434813	0.296656	0.947181	NS or Estimate < 0.5
ARHGAP25	lobule vs duct	0.300869	0.476318	0.964543	NS or Estimate < 0.5
RGMA	lobule vs duct	-0.371094	0.322212	0.948223	NS or Estimate < 0.5
SLC26A11	lobule vs duct	0.790151	0.0736912	0.871672	NS or Estimate < 0.5
SHMT2	lobule vs duct	0.571731	0.144205	0.895684	NS or Estimate < 0.5
MTUS1	lobule vs duct	-0.801174	0.0846404	0.879448	NS or Estimate < 0.5
SMOC2	lobule vs duct	0.418524	0.261731	0.941091	NS or Estimate < 0.5
EHHADH	lobule vs duct	0.421048	0.155546	0.895684	NS or Estimate < 0.5
MPP1	lobule vs duct	-0.163733	0.715692	0.980141	NS or Estimate < 0.5
FAM122B	lobule vs duct	0.64327	0.0963113	0.879448	NS or Estimate < 0.5
AFF1	lobule vs duct	-0.410666	0.279501	0.947181	NS or Estimate < 0.5
FAM104B	lobule vs duct	-0.374896	0.299941	0.947181	NS or Estimate < 0.5
XIAP	lobule vs duct	-0.132516	0.717053	0.980141	NS or Estimate < 0.5
CAAP1	lobule vs duct	-0.346384	0.190497	0.916644	NS or Estimate < 0.5
NEU4	lobule vs duct	0.336639	0.403806	0.958249	NS or Estimate < 0.5
RAB35	lobule vs duct	-0.335325	0.477312	0.964543	NS or Estimate < 0.5
DMAC2	lobule vs duct	-0.315167	0.4426	0.958249	NS or Estimate < 0.5
CMSS1	lobule vs duct	-0.43609	0.403314	0.958249	NS or Estimate < 0.5
TNFAIP8L1	lobule vs duct	-0.0864008	0.817484	0.98763	NS or Estimate < 0.5
TMEM178A	lobule vs duct	-0.0299401	0.92019	0.992684	NS or Estimate < 0.5
KCTD7	lobule vs duct	-0.0591661	0.881396	0.991584	NS or Estimate < 0.5
BIRC5	lobule vs duct	-0.314013	0.338719	0.94863	NS or Estimate < 0.5
C3orf80	lobule vs duct	-0.532837	0.168049	0.903491	NS or Estimate < 0.5
TBC1D17	lobule vs duct	0.263822	0.381181	0.958249	NS or Estimate < 0.5
WWTR1	lobule vs duct	-0.836944	0.01551	0.775073	P < 0.05
EDN1	lobule vs duct	0.0630045	0.901586	0.991584	NS or Estimate < 0.5
TESC	lobule vs duct	-0.40032	0.353028	0.953824	NS or Estimate < 0.5
TTC39B	lobule vs duct	0.396338	0.294836	0.947181	NS or Estimate < 0.5
KRTCAP3	lobule vs duct	-0.218384	0.598838	0.978398	NS or Estimate < 0.5
CUL7	lobule vs duct	-0.293725	0.295231	0.947181	NS or Estimate < 0.5
BEX2	lobule vs duct	-0.105281	0.803924	0.987478	NS or Estimate < 0.5
PDZD3	lobule vs duct	-0.419734	0.351472	0.953059	NS or Estimate < 0.5
IFT46	lobule vs duct	-0.614722	0.134562	0.895684	NS or Estimate < 0.5
SAP25	lobule vs duct	-1.07467	0.0492875	0.847619	P < 0.05
AQP7	lobule vs duct	-0.256381	0.493313	0.968564	NS or Estimate < 0.5
TJP2	lobule vs duct	-0.252162	0.593761	0.977041	NS or Estimate < 0.5
DZIP1L	lobule vs duct	0.207361	0.482047	0.966475	NS or Estimate < 0.5
HHAT	lobule vs duct	-0.385956	0.393242	0.958249	NS or Estimate < 0.5
LAS1L	lobule vs duct	-0.614722	0.0362427	0.824123	P < 0.05
MFSD5	lobule vs duct	-0.274845	0.373885	0.956886	NS or Estimate < 0.5
ZNF736	lobule vs duct	-0.346384	0.3858	0.958249	NS or Estimate < 0.5
STRBP	lobule vs duct	0.236223	0.441997	0.958249	NS or Estimate < 0.5
PET100	lobule vs duct	0.511468	0.155264	0.895684	NS or Estimate < 0.5
ZMYM3	lobule vs duct	-0.450952	0.148375	0.895684	NS or Estimate < 0.5
UBAP1	lobule vs duct	0.274167	0.467712	0.964539	NS or Estimate < 0.5
ZEB2	lobule vs duct	-1.33921	0.00623668	0.677763	P < 0.05
C3orf52	lobule vs duct	0.0584887	0.89102	0.991584	NS or Estimate < 0.5
NUDT16	lobule vs duct	-0.299555	0.428559	0.958249	NS or Estimate < 0.5
KXD1	lobule vs duct	-0.144853	0.665377	0.97862	NS or Estimate < 0.5
AGA	lobule vs duct	0.475698	0.167618	0.903491	NS or Estimate < 0.5
TBP	lobule vs duct	-0.0130508	0.96993	0.99599	NS or Estimate < 0.5
ZNF540	lobule vs duct	0.464639	0.0987294	0.879448	NS or Estimate < 0.5
MASTL	lobule vs duct	-0.392499	0.343927	0.950542	NS or Estimate < 0.5
PLS3	lobule vs duct	-0.715619	0.0510551	0.847632	NS or Estimate < 0.5
KCNJ13	lobule vs duct	-0.755059	0.0121429	0.745351	P < 0.05
EFHC1	lobule vs duct	-0.725833	0.120931	0.888435	NS or Estimate < 0.5
KLHL7	lobule vs duct	-0.532837	0.13949	0.895684	NS or Estimate < 0.5
GOLGA3	lobule vs duct	-0.226738	0.481053	0.966475	NS or Estimate < 0.5
TECPR2	lobule vs duct	-0.33984	0.294125	0.947181	NS or Estimate < 0.5
ZFP62	lobule vs duct	-0.346384	0.224674	0.929074	NS or Estimate < 0.5
ZNF177	lobule vs duct	0.439929	0.180092	0.914522	NS or Estimate < 0.5
ZFYVE28	lobule vs duct	-0.0838764	0.839364	0.988336	NS or Estimate < 0.5
RAB40C	lobule vs duct	-0.0123368	0.97136	0.99599	NS or Estimate < 0.5
TSFM	lobule vs duct	0.287818	0.41703	0.958249	NS or Estimate < 0.5
SLC38A6	lobule vs duct	0.1696	0.747522	0.983929	NS or Estimate < 0.5
PGM1	lobule vs duct	-0.153388	0.660303	0.97862	NS or Estimate < 0.5
YTHDF2	lobule vs duct	0.215715	0.623978	0.978398	NS or Estimate < 0.5
KIF21A	lobule vs duct	-0.639432	0.0883338	0.879448	NS or Estimate < 0.5
SP7	lobule vs duct	-0.419734	0.278566	0.947181	NS or Estimate < 0.5
ARHGEF9	lobule vs duct	0.461334	0.26015	0.940091	NS or Estimate < 0.5
NEBL	lobule vs duct	0.257278	0.476475	0.964543	NS or Estimate < 0.5
MAN2B1	lobule vs duct	-0.166675	0.639947	0.978398	NS or Estimate < 0.5
MRRF	lobule vs duct	-0.291734	0.48947	0.967128	NS or Estimate < 0.5
TXNRD3	lobule vs duct	-0.0591661	0.88174	0.991584	NS or Estimate < 0.5
DGCR2	lobule vs duct	-0.281388	0.500971	0.969783	NS or Estimate < 0.5
BRD7	lobule vs duct	-0.262508	0.480142	0.965866	NS or Estimate < 0.5
SPAM1	lobule vs duct	-0.205333	0.609869	0.978398	NS or Estimate < 0.5
OSBPL10	lobule vs duct	-0.467841	0.0618846	0.849867	NS or Estimate < 0.5
SERINC5	lobule vs duct	-0.170277	0.65372	0.97862	NS or Estimate < 0.5
POLL	lobule vs duct	0.421048	0.216369	0.929074	NS or Estimate < 0.5
LDHB	lobule vs duct	0.309937	0.285253	0.947181	NS or Estimate < 0.5
PRR7	lobule vs duct	-0.336039	0.412491	0.958249	NS or Estimate < 0.5
DMXL2	lobule vs duct	-0.845479	0.0869023	0.879448	NS or Estimate < 0.5
GOLGA7	lobule vs duct	-0.122134	0.724194	0.980141	NS or Estimate < 0.5
RABEPK	lobule vs duct	-0.310614	0.243692	0.931251	NS or Estimate < 0.5
ARHGDIB	lobule vs duct	0.586096	0.115816	0.885803	NS or Estimate < 0.5
ARL1	lobule vs duct	0.152711	0.741825	0.983929	NS or Estimate < 0.5
SLC34A3	lobule vs duct	0.217706	0.564239	0.977041	NS or Estimate < 0.5
CPEB2	lobule vs duct	0.13383	0.744441	0.983929	NS or Estimate < 0.5
LGALS3	lobule vs duct	-0.219698	0.556087	0.975755	NS or Estimate < 0.5
MAMLD1	lobule vs duct	0.163056	0.665642	0.97862	NS or Estimate < 0.5
PPP2R2A	lobule vs duct	-0.262508	0.442579	0.958249	NS or Estimate < 0.5
SUCLG2	lobule vs duct	0.486044	0.031675	0.824123	NS or Estimate < 0.5
CD33	lobule vs duct	-0.128678	0.752697	0.983929	NS or Estimate < 0.5
RIF1	lobule vs duct	0.174116	0.62753	0.978398	NS or Estimate < 0.5
KLF11	lobule vs duct	0.697921	0.0647609	0.850795	NS or Estimate < 0.5
SRPRA	lobule vs duct	-0.327504	0.337172	0.94863	NS or Estimate < 0.5
SYCP3	lobule vs duct	-0.337849	0.486214	0.966712	NS or Estimate < 0.5
PHETA1	lobule vs duct	-0.457495	0.211652	0.929074	NS or Estimate < 0.5
BHMT2	lobule vs duct	0.594631	0.150003	0.895684	NS or Estimate < 0.5
STX3	lobule vs duct	-0.161742	0.69832	0.979883	NS or Estimate < 0.5
SYNJ2	lobule vs duct	0.672496	0.101584	0.884312	NS or Estimate < 0.5
ZNF182	lobule vs duct	-0.329495	0.502425	0.969783	NS or Estimate < 0.5
SCAMP5	lobule vs duct	-0.446436	0.203478	0.923835	NS or Estimate < 0.5
IGLL5	lobule vs duct	-1.01709	0.216088	0.929074	NS or Estimate < 0.5
SUFU	lobule vs duct	0.838258	0.0415256	0.829704	P < 0.05
ASGR2	lobule vs duct	0.538703	0.228958	0.929074	NS or Estimate < 0.5
ATP6AP1	lobule vs duct	-0.00853507	0.984342	0.99599	NS or Estimate < 0.5
ATR	lobule vs duct	-0.332019	0.409893	0.958249	NS or Estimate < 0.5
GYG2	lobule vs duct	-0.00881361	0.988887	0.99599	NS or Estimate < 0.5
HADH	lobule vs duct	-0.0695116	0.882587	0.991584	NS or Estimate < 0.5
SLAMF6	lobule vs duct	0.66016	0.165325	0.901693	NS or Estimate < 0.5
PIGT	lobule vs duct	0.697921	0.115829	0.885803	NS or Estimate < 0.5
CTTN	lobule vs duct	0.00383839	0.992482	0.99599	NS or Estimate < 0.5
CLTA	lobule vs duct	-0.31392	0.464438	0.962672	NS or Estimate < 0.5
TMLHE	lobule vs duct	0.116941	0.691028	0.979679	NS or Estimate < 0.5
PRMT7	lobule vs duct	-0.346384	0.295361	0.947181	NS or Estimate < 0.5
KLHDC4	lobule vs duct	-0.313556	0.387618	0.958249	NS or Estimate < 0.5
PHF8	lobule vs duct	-0.134507	0.676056	0.979679	NS or Estimate < 0.5
CARD8	lobule vs duct	-0.467841	0.190457	0.916644	NS or Estimate < 0.5
PACSIN2	lobule vs duct	-0.564548	0.198738	0.917019	NS or Estimate < 0.5
RNF17	lobule vs duct	-0.744713	0.0141887	0.758946	P < 0.05
MARF1	lobule vs duct	0.620551	0.0887744	0.879448	NS or Estimate < 0.5
NDUFA2	lobule vs duct	-0.392499	0.184079	0.915918	NS or Estimate < 0.5
CLDN11	lobule vs duct	0.331342	0.427026	0.958249	NS or Estimate < 0.5
TUT7	lobule vs duct	-0.639432	0.120749	0.888435	NS or Estimate < 0.5
ARHGDIA	lobule vs duct	-0.0448013	0.9128	0.991948	NS or Estimate < 0.5
NIT1	lobule vs duct	-0.364551	0.38085	0.958249	NS or Estimate < 0.5
PLCXD2	lobule vs duct	0.187766	0.685727	0.979679	NS or Estimate < 0.5
CES3	lobule vs duct	-0.690063	0.0724331	0.870337	NS or Estimate < 0.5
BACH1	lobule vs duct	-0.402845	0.304931	0.947181	NS or Estimate < 0.5
BAK1	lobule vs duct	-0.700408	0.0639799	0.849867	NS or Estimate < 0.5
BCAT2	lobule vs duct	-0.0422769	0.903159	0.991584	NS or Estimate < 0.5
IFT80	lobule vs duct	-1.0234	0.00074378	0.45898	P < 0.05
RPH3AL	lobule vs duct	-0.446436	0.192166	0.916861	NS or Estimate < 0.5
TAF6	lobule vs duct	0.081171	0.829165	0.988336	NS or Estimate < 0.5
ZNF674	lobule vs duct	-0.0233963	0.953354	0.995249	NS or Estimate < 0.5
MTRNR2L1	lobule vs duct	0.0688342	0.839911	0.988336	NS or Estimate < 0.5
KRTAP9-1	lobule vs duct	-0.650491	0.073751	0.871672	NS or Estimate < 0.5
CTH	lobule vs duct	0.421048	0.199973	0.917302	NS or Estimate < 0.5
MTRNR2L5	lobule vs duct	0.163056	0.618137	0.978398	NS or Estimate < 0.5
ALS2CL	lobule vs duct	0.538703	0.175605	0.91238	NS or Estimate < 0.5
RALGPS1	lobule vs duct	-0.373619	0.326714	0.948223	NS or Estimate < 0.5
DHX35	lobule vs duct	0.181937	0.636555	0.978398	NS or Estimate < 0.5
PLEKHA5	lobule vs duct	-0.787887	0.050766	0.847632	NS or Estimate < 0.5
HYI	lobule vs duct	0.523805	0.129122	0.888435	NS or Estimate < 0.5
FAM193B	lobule vs duct	0.608215	0.0956141	0.879448	NS or Estimate < 0.5
PIWIL1	lobule vs duct	0.446472	0.184411	0.915918	NS or Estimate < 0.5
[truncated: 8,272 more rows]
