# Supplementary material for: Single nuclei chromatin accessibility and transcriptomic map of breast tissues of women of diverse genetic ancestry
Source: bioRxiv preprint, doi:10.1101/2023.10.04.560911, version 1 (2023-10-06)
Supplement: Table S17 [file 560911_file27.xlsx]

## Sheet: Sheet 1
Table S17: Gene expression differences in ductal and lobular epithelial cells at timepoint 2
Feature	Comparison	Estimate	P	BH	sig_level
A2M	lobule vs duct	0.00331641	0.988698	0.999774	NS or Estimate < 0.5
NAT2	lobule vs duct	0.452455	0.135664	0.859959	NS or Estimate < 0.5
ACADM	lobule vs duct	0.0749119	0.794534	0.987015	NS or Estimate < 0.5
ACADS	lobule vs duct	-0.0157837	0.964512	0.997946	NS or Estimate < 0.5
ACAT1	lobule vs duct	0.0989404	0.752432	0.986115	NS or Estimate < 0.5
PSEN1	lobule vs duct	0.46141	0.159854	0.86699	NS or Estimate < 0.5
ADA	lobule vs duct	0.601636	0.0529694	0.778973	NS or Estimate < 0.5
SGCA	lobule vs duct	-0.111254	0.694832	0.980654	NS or Estimate < 0.5
AGL	lobule vs duct	0.348515	0.3415	0.922551	NS or Estimate < 0.5
ABCD1	lobule vs duct	0.0516085	0.869389	0.992144	NS or Estimate < 0.5
ALDOB	lobule vs duct	0.394938	0.279266	0.910511	NS or Estimate < 0.5
AMPD1	lobule vs duct	0.240413	0.445763	0.947586	NS or Estimate < 0.5
APOC3	lobule vs duct	-0.20192	0.628721	0.976256	NS or Estimate < 0.5
APOE	lobule vs duct	0.163519	0.637714	0.976256	NS or Estimate < 0.5
ASL	lobule vs duct	0.4986	0.140407	0.863579	NS or Estimate < 0.5
ASS1	lobule vs duct	-0.607271	0.0655713	0.797887	NS or Estimate < 0.5
ATM	lobule vs duct	-0.0407867	0.90162	0.994961	NS or Estimate < 0.5
AVPR2	lobule vs duct	0.35131	0.23202	0.897568	NS or Estimate < 0.5
BTK	lobule vs duct	-0.280878	0.376495	0.931006	NS or Estimate < 0.5
SERPING1	lobule vs duct	-0.383516	0.0793069	0.815643	NS or Estimate < 0.5
C3	lobule vs duct	0.171466	0.475886	0.951304	NS or Estimate < 0.5
CBS	lobule vs duct	0.239059	0.415361	0.94146	NS or Estimate < 0.5
CD36	lobule vs duct	-0.674877	0.0473414	0.77139	P < 0.05
CDK4	lobule vs duct	0.48972	0.125163	0.858492	NS or Estimate < 0.5
CDKN1C	lobule vs duct	-0.0946805	0.783735	0.986712	NS or Estimate < 0.5
LYST	lobule vs duct	0.0256269	0.945046	0.996715	NS or Estimate < 0.5
ERCC8	lobule vs duct	0.0430267	0.890423	0.99418	NS or Estimate < 0.5
CLN3	lobule vs duct	0.0445198	0.866507	0.992144	NS or Estimate < 0.5
COL1A1	lobule vs duct	-0.593485	0.0855862	0.829417	NS or Estimate < 0.5
COL1A2	lobule vs duct	-0.688053	0.0256437	0.726191	P < 0.05
COL5A1	lobule vs duct	-0.412684	0.204577	0.883452	NS or Estimate < 0.5
CPOX	lobule vs duct	0.0384443	0.910269	0.994961	NS or Estimate < 0.5
CPT2	lobule vs duct	0.0705922	0.822894	0.987966	NS or Estimate < 0.5
CST3	lobule vs duct	0.294152	0.262715	0.905922	NS or Estimate < 0.5
CSTB	lobule vs duct	0.107686	0.679021	0.977911	NS or Estimate < 0.5
CYP2D6	lobule vs duct	0.129151	0.684027	0.978588	NS or Estimate < 0.5
DDB2	lobule vs duct	0.00132169	0.99686	0.99991	NS or Estimate < 0.5
DLD	lobule vs duct	0.174679	0.620834	0.976256	NS or Estimate < 0.5
EMD	lobule vs duct	-0.268284	0.385128	0.932406	NS or Estimate < 0.5
EPB42	lobule vs duct	-0.103924	0.755122	0.986115	NS or Estimate < 0.5
EPHX1	lobule vs duct	-0.762684	0.023641	0.7219	P < 0.05
ERCC5	lobule vs duct	-0.0476437	0.852511	0.991095	NS or Estimate < 0.5
EXT1	lobule vs duct	-0.389503	0.26239	0.905491	NS or Estimate < 0.5
F5	lobule vs duct	0.0468132	0.887939	0.99418	NS or Estimate < 0.5
FABP2	lobule vs duct	-0.135629	0.729838	0.984474	NS or Estimate < 0.5
FANCA	lobule vs duct	0.17433	0.631452	0.976256	NS or Estimate < 0.5
FAH	lobule vs duct	-0.115038	0.730051	0.984474	NS or Estimate < 0.5
FECH	lobule vs duct	-0.151763	0.675762	0.977911	NS or Estimate < 0.5
FGFR2	lobule vs duct	-0.30867	0.292589	0.913334	NS or Estimate < 0.5
FH	lobule vs duct	-0.0974897	0.741018	0.985997	NS or Estimate < 0.5
FUCA1	lobule vs duct	-0.558824	0.0750001	0.814374	NS or Estimate < 0.5
FUT1	lobule vs duct	-0.523572	0.1382	0.863244	NS or Estimate < 0.5
FUT6	lobule vs duct	-0.251279	0.559583	0.963227	NS or Estimate < 0.5
GALC	lobule vs duct	0.0108675	0.973025	0.99918	NS or Estimate < 0.5
GALT	lobule vs duct	-0.333555	0.188533	0.873883	NS or Estimate < 0.5
GBE1	lobule vs duct	-0.331994	0.349247	0.92551	NS or Estimate < 0.5
GCDH	lobule vs duct	-0.424799	0.171142	0.86699	NS or Estimate < 0.5
GJA1	lobule vs duct	-0.231999	0.542634	0.962957	NS or Estimate < 0.5
GK	lobule vs duct	0.14137	0.782795	0.986712	NS or Estimate < 0.5
GLI3	lobule vs duct	-0.0770892	0.813212	0.987966	NS or Estimate < 0.5
GP9	lobule vs duct	0.192672	0.53321	0.96181	NS or Estimate < 0.5
GPI	lobule vs duct	0.100289	0.767007	0.986115	NS or Estimate < 0.5
GSN	lobule vs duct	-0.36061	0.209491	0.889616	NS or Estimate < 0.5
MSH6	lobule vs duct	-0.553018	0.0784883	0.815643	NS or Estimate < 0.5
GUSB	lobule vs duct	-0.1633	0.619039	0.976256	NS or Estimate < 0.5
HADHA	lobule vs duct	0.144674	0.683116	0.978588	NS or Estimate < 0.5
HADHB	lobule vs duct	0.437631	0.10613	0.854338	NS or Estimate < 0.5
HBG2	lobule vs duct	0.0196494	0.949716	0.997273	NS or Estimate < 0.5
HGD	lobule vs duct	0.48657	0.13553	0.859959	NS or Estimate < 0.5
HK1	lobule vs duct	-0.0323086	0.914063	0.994961	NS or Estimate < 0.5
HK2	lobule vs duct	0.208885	0.555641	0.963227	NS or Estimate < 0.5
HPRT1	lobule vs duct	0.13642	0.707321	0.982545	NS or Estimate < 0.5
HPS1	lobule vs duct	0.381848	0.305042	0.915952	NS or Estimate < 0.5
HSD11B2	lobule vs duct	-0.664345	0.0285966	0.741635	P < 0.05
HSD3B2	lobule vs duct	-0.00374164	0.988154	0.999774	NS or Estimate < 0.5
SGSH	lobule vs duct	-0.362451	0.157908	0.86699	NS or Estimate < 0.5
IDS	lobule vs duct	0.331672	0.260713	0.904569	NS or Estimate < 0.5
IDUA	lobule vs duct	0.342355	0.348536	0.92551	NS or Estimate < 0.5
INSR	lobule vs duct	-0.473164	0.0840223	0.824864	NS or Estimate < 0.5
PDX1	lobule vs duct	-0.213732	0.415687	0.941783	NS or Estimate < 0.5
ITGA6	lobule vs duct	0.210575	0.570391	0.965855	NS or Estimate < 0.5
JAG1	lobule vs duct	-0.36576	0.251861	0.90203	NS or Estimate < 0.5
JAK3	lobule vs duct	-0.0726926	0.840755	0.988571	NS or Estimate < 0.5
KRT12	lobule vs duct	0.0785972	0.76861	0.986115	NS or Estimate < 0.5
KRT18	lobule vs duct	-0.0987367	0.512041	0.958145	NS or Estimate < 0.5
LAMA3	lobule vs duct	0.230811	0.44157	0.947091	NS or Estimate < 0.5
LAMB3	lobule vs duct	0.0470778	0.885356	0.993474	NS or Estimate < 0.5
SGCB	lobule vs duct	-0.037751	0.917033	0.994961	NS or Estimate < 0.5
LIPA	lobule vs duct	0.384682	0.269559	0.90767	NS or Estimate < 0.5
MLH1	lobule vs duct	0.165912	0.710052	0.982545	NS or Estimate < 0.5
MTM1	lobule vs duct	-0.62371	0.108639	0.854338	NS or Estimate < 0.5
MTR	lobule vs duct	-0.00172777	0.994588	0.99991	NS or Estimate < 0.5
MMUT	lobule vs duct	-0.010814	0.96922	0.998679	NS or Estimate < 0.5
PTCH1	lobule vs duct	-0.283646	0.418937	0.943641	NS or Estimate < 0.5
NCF1	lobule vs duct	0.0230975	0.94379	0.996715	NS or Estimate < 0.5
NDP	lobule vs duct	-0.191218	0.583909	0.969923	NS or Estimate < 0.5
NF1	lobule vs duct	0.0479566	0.889884	0.99418	NS or Estimate < 0.5
PNP	lobule vs duct	0.24443	0.423827	0.943641	NS or Estimate < 0.5
NPC1	lobule vs duct	-0.0764244	0.804884	0.987966	NS or Estimate < 0.5
OAT	lobule vs duct	0.246138	0.24141	0.901174	NS or Estimate < 0.5
PAX6	lobule vs duct	-0.150627	0.583252	0.969923	NS or Estimate < 0.5
PCBD1	lobule vs duct	0.401592	0.124915	0.858492	NS or Estimate < 0.5
PDHA1	lobule vs duct	-0.339293	0.292336	0.913334	NS or Estimate < 0.5
PEPD	lobule vs duct	0.369225	0.18787	0.873665	NS or Estimate < 0.5
PEX12	lobule vs duct	0.0177205	0.946087	0.996715	NS or Estimate < 0.5
PEX6	lobule vs duct	-0.102059	0.778528	0.986115	NS or Estimate < 0.5
PEX7	lobule vs duct	0.310105	0.341024	0.922551	NS or Estimate < 0.5
PFKM	lobule vs duct	0.378808	0.183394	0.87104	NS or Estimate < 0.5
PGK1	lobule vs duct	0.317763	0.272461	0.907759	NS or Estimate < 0.5
PHKA2	lobule vs duct	0.28456	0.345844	0.924712	NS or Estimate < 0.5
PHKB	lobule vs duct	-0.228121	0.541066	0.96181	NS or Estimate < 0.5
PHKG2	lobule vs duct	0.121328	0.636051	0.976256	NS or Estimate < 0.5
SERPINA1	lobule vs duct	0.0492392	0.916753	0.994961	NS or Estimate < 0.5
PKD2	lobule vs duct	0.357487	0.280847	0.910698	NS or Estimate < 0.5
PKP1	lobule vs duct	-0.826107	0.0219275	0.715791	P < 0.05
PLA2G2A	lobule vs duct	0.0947112	0.718848	0.983677	NS or Estimate < 0.5
PLOD1	lobule vs duct	-0.00438477	0.98926	0.999774	NS or Estimate < 0.5
PMM2	lobule vs duct	0.00767415	0.982856	0.999774	NS or Estimate < 0.5
PMP22	lobule vs duct	0.38156	0.185957	0.873665	NS or Estimate < 0.5
PON2	lobule vs duct	-0.131214	0.72906	0.984474	NS or Estimate < 0.5
POU3F4	lobule vs duct	-0.120895	0.775181	0.986115	NS or Estimate < 0.5
PRNP	lobule vs duct	-0.0852748	0.731892	0.984474	NS or Estimate < 0.5
PROC	lobule vs duct	0.365087	0.294713	0.913334	NS or Estimate < 0.5
PROS1	lobule vs duct	-0.505088	0.176373	0.86699	NS or Estimate < 0.5
PTH	lobule vs duct	0.313864	0.351291	0.926354	NS or Estimate < 0.5
PTH1R	lobule vs duct	-0.198135	0.594763	0.973137	NS or Estimate < 0.5
PTS	lobule vs duct	-0.110162	0.7417	0.985997	NS or Estimate < 0.5
QDPR	lobule vs duct	0.436572	0.0931404	0.836048	NS or Estimate < 0.5
RB1	lobule vs duct	0.143706	0.630934	0.976256	NS or Estimate < 0.5
PITX2	lobule vs duct	-0.437723	0.231183	0.897568	NS or Estimate < 0.5
RS1	lobule vs duct	0.599998	0.0649178	0.796953	NS or Estimate < 0.5
ATXN1	lobule vs duct	0.187899	0.557837	0.963227	NS or Estimate < 0.5
SGCD	lobule vs duct	-0.341507	0.316785	0.916726	NS or Estimate < 0.5
SLC2A2	lobule vs duct	0.392982	0.243406	0.901999	NS or Estimate < 0.5
SLC3A1	lobule vs duct	-0.577637	0.250577	0.90203	NS or Estimate < 0.5
SLC5A1	lobule vs duct	-0.134264	0.684219	0.978588	NS or Estimate < 0.5
SMN1	lobule vs duct	0.184138	0.541475	0.961946	NS or Estimate < 0.5
SNCA	lobule vs duct	0.29732	0.295907	0.91336	NS or Estimate < 0.5
TCOF1	lobule vs duct	0.756803	0.0239736	0.722021	P < 0.05
TIMP3	lobule vs duct	0.0177133	0.960427	0.997611	NS or Estimate < 0.5
TPI1	lobule vs duct	0.306607	0.280131	0.910698	NS or Estimate < 0.5
TPM1	lobule vs duct	0.472784	0.032509	0.746354	NS or Estimate < 0.5
TPMT	lobule vs duct	-0.14637	0.646001	0.976256	NS or Estimate < 0.5
TSC1	lobule vs duct	-0.563933	0.0806291	0.819863	NS or Estimate < 0.5
UROS	lobule vs duct	0.443023	0.355882	0.9268	NS or Estimate < 0.5
XDH	lobule vs duct	-0.557067	0.094886	0.838659	NS or Estimate < 0.5
XPA	lobule vs duct	0.0676349	0.817961	0.987966	NS or Estimate < 0.5
AIRE	lobule vs duct	-0.598623	0.0549877	0.778973	NS or Estimate < 0.5
APOB	lobule vs duct	0.0452162	0.907028	0.994961	NS or Estimate < 0.5
BLMH	lobule vs duct	-0.182109	0.545584	0.963227	NS or Estimate < 0.5
TPP1	lobule vs duct	0.128931	0.662226	0.976256	NS or Estimate < 0.5
COL5A2	lobule vs duct	-0.0970663	0.7368	0.985211	NS or Estimate < 0.5
CTSK	lobule vs duct	-0.0996303	0.713395	0.982545	NS or Estimate < 0.5
CYBB	lobule vs duct	0.417122	0.148328	0.86699	NS or Estimate < 0.5
CYB5R3	lobule vs duct	0.208357	0.47521	0.951304	NS or Estimate < 0.5
ERCC2	lobule vs duct	-0.101538	0.763025	0.986115	NS or Estimate < 0.5
G6PD	lobule vs duct	0.0474104	0.873569	0.992144	NS or Estimate < 0.5
GM2A	lobule vs duct	-0.160547	0.531859	0.96181	NS or Estimate < 0.5
HLCS	lobule vs duct	0.732969	0.0313157	0.743721	P < 0.05
HSD17B4	lobule vs duct	0.176304	0.555118	0.963227	NS or Estimate < 0.5
IFNGR1	lobule vs duct	0.345609	0.089449	0.835544	NS or Estimate < 0.5
IL2RA	lobule vs duct	-0.351378	0.172233	0.86699	NS or Estimate < 0.5
KRT17	lobule vs duct	1.63378	1.84289e-05	0.189265	P < 0.05
LTBP2	lobule vs duct	0.247324	0.378225	0.931084	NS or Estimate < 0.5
PAFAH1B1	lobule vs duct	-0.661092	0.072253	0.810971	NS or Estimate < 0.5
MVK	lobule vs duct	-0.0642219	0.857936	0.991877	NS or Estimate < 0.5
NOTCH3	lobule vs duct	0.262904	0.465629	0.950909	NS or Estimate < 0.5
PAFAH2	lobule vs duct	0.417146	0.251652	0.90203	NS or Estimate < 0.5
PLEC	lobule vs duct	-0.165412	0.320614	0.916726	NS or Estimate < 0.5
PSEN2	lobule vs duct	0.793964	0.0183822	0.68569	P < 0.05
SLC10A2	lobule vs duct	0.6573	0.0528154	0.778973	NS or Estimate < 0.5
SLC5A5	lobule vs duct	0.183505	0.554528	0.963227	NS or Estimate < 0.5
AK1	lobule vs duct	-0.262557	0.334219	0.920695	NS or Estimate < 0.5
ALPL	lobule vs duct	-0.45682	0.19434	0.876417	NS or Estimate < 0.5
AMH	lobule vs duct	-0.0549666	0.841608	0.988571	NS or Estimate < 0.5
AMPD3	lobule vs duct	-0.0317471	0.913744	0.994961	NS or Estimate < 0.5
APP	lobule vs duct	0.0792556	0.665537	0.976256	NS or Estimate < 0.5
APRT	lobule vs duct	0.470245	0.109735	0.854338	NS or Estimate < 0.5
AQP2	lobule vs duct	0.253813	0.146412	0.86699	NS or Estimate < 0.5
ARSA	lobule vs duct	0.627447	0.0312274	0.743721	P < 0.05
ATRX	lobule vs duct	0.311211	0.232313	0.897568	NS or Estimate < 0.5
C1QB	lobule vs duct	0.425764	0.0706894	0.805808	NS or Estimate < 0.5
COL4A5	lobule vs duct	0.425411	0.0932923	0.836048	NS or Estimate < 0.5
F12	lobule vs duct	0.269777	0.433249	0.943904	NS or Estimate < 0.5
FUT2	lobule vs duct	-0.483331	0.127537	0.858492	NS or Estimate < 0.5
HEXA	lobule vs duct	0.108702	0.727424	0.984474	NS or Estimate < 0.5
HEXB	lobule vs duct	0.306425	0.321988	0.916726	NS or Estimate < 0.5
KCNJ11	lobule vs duct	-0.108725	0.779487	0.986201	NS or Estimate < 0.5
KRT14	lobule vs duct	1.28762	0.00430478	0.544945	P < 0.05
LDLR	lobule vs duct	-0.0359023	0.898238	0.994961	NS or Estimate < 0.5
PMS1	lobule vs duct	0.599995	0.076354	0.814374	NS or Estimate < 0.5
TSC2	lobule vs duct	-0.246215	0.523729	0.961095	NS or Estimate < 0.5
VHL	lobule vs duct	9.39489e-05	0.999781	0.99991	NS or Estimate < 0.5
VWF	lobule vs duct	0.0116639	0.981497	0.999774	NS or Estimate < 0.5
WRN	lobule vs duct	0.140503	0.663394	0.976256	NS or Estimate < 0.5
DCX	lobule vs duct	0.347661	0.270231	0.907759	NS or Estimate < 0.5
FCGR1A	lobule vs duct	0.242163	0.445629	0.947586	NS or Estimate < 0.5
FCGR3A	lobule vs duct	0.707817	0.0288166	0.741711	P < 0.05
CR1	lobule vs duct	-0.468255	0.178333	0.869022	NS or Estimate < 0.5
CD55	lobule vs duct	1.04807	0.000759331	0.391759	P < 0.05
SLC11A1	lobule vs duct	0.177256	0.630566	0.976256	NS or Estimate < 0.5
GPX1	lobule vs duct	0.248254	0.277537	0.910243	NS or Estimate < 0.5
C7	lobule vs duct	0.213891	0.415309	0.94146	NS or Estimate < 0.5
CD14	lobule vs duct	-0.111489	0.687387	0.978588	NS or Estimate < 0.5
IGFBP2	lobule vs duct	-0.257778	0.424338	0.943641	NS or Estimate < 0.5
ORM2	lobule vs duct	0.0477722	0.830266	0.987966	NS or Estimate < 0.5
CD59	lobule vs duct	0.319991	0.147691	0.86699	NS or Estimate < 0.5
HPX	lobule vs duct	0.243504	0.496351	0.954392	NS or Estimate < 0.5
CD4	lobule vs duct	-0.429603	0.245178	0.90203	NS or Estimate < 0.5
SLC11A2	lobule vs duct	0.375856	0.154713	0.86699	NS or Estimate < 0.5
IGF1	lobule vs duct	-0.736889	0.00939937	0.621525	P < 0.05
SERPINA5	lobule vs duct	-0.154017	0.784043	0.986712	NS or Estimate < 0.5
NOS2	lobule vs duct	0.579733	0.191647	0.876139	NS or Estimate < 0.5
IFNAR1	lobule vs duct	-0.500892	0.128607	0.858492	NS or Estimate < 0.5
RFX2	lobule vs duct	-0.00777896	0.976282	0.999465	NS or Estimate < 0.5
SOD2	lobule vs duct	0.676028	0.0044114	0.544945	P < 0.05
GSR	lobule vs duct	-0.278734	0.401902	0.939436	NS or Estimate < 0.5
IL13RA2	lobule vs duct	0.08938	0.76929	0.986115	NS or Estimate < 0.5
TGFB1	lobule vs duct	-0.545106	0.110827	0.854338	NS or Estimate < 0.5
RPL9	lobule vs duct	-0.198749	0.176056	0.86699	NS or Estimate < 0.5
ACY1	lobule vs duct	0.381332	0.155428	0.86699	NS or Estimate < 0.5
ADH5	lobule vs duct	0.368856	0.253119	0.902126	NS or Estimate < 0.5
ADH7	lobule vs duct	-0.165722	0.742974	0.986115	NS or Estimate < 0.5
ADORA2B	lobule vs duct	-0.464457	0.161035	0.86699	NS or Estimate < 0.5
ADRA1D	lobule vs duct	-0.404848	0.154729	0.86699	NS or Estimate < 0.5
ADRB1	lobule vs duct	0.516403	0.207408	0.888834	NS or Estimate < 0.5
AGTR2	lobule vs duct	0.385427	0.254581	0.902502	NS or Estimate < 0.5
ALDH2	lobule vs duct	-0.317754	0.328315	0.918996	NS or Estimate < 0.5
ALDH1B1	lobule vs duct	-0.430398	0.199382	0.876417	NS or Estimate < 0.5
ALDH1A3	lobule vs duct	0.550696	0.206721	0.887554	NS or Estimate < 0.5
ALDH3B2	lobule vs duct	-0.120493	0.666342	0.976256	NS or Estimate < 0.5
ALDH9A1	lobule vs duct	-0.168889	0.411489	0.941085	NS or Estimate < 0.5
ALOX12	lobule vs duct	-0.405238	0.257493	0.902927	NS or Estimate < 0.5
ALOX5	lobule vs duct	0.456757	0.143514	0.866148	NS or Estimate < 0.5
ANXA1	lobule vs duct	1.17569	5.33343e-05	0.273872	P < 0.05
ATP1A1	lobule vs duct	-0.0139036	0.94505	0.996715	NS or Estimate < 0.5
ATP4A	lobule vs duct	-0.0154417	0.956757	0.997611	NS or Estimate < 0.5
AVPR1B	lobule vs duct	-0.042929	0.917486	0.994961	NS or Estimate < 0.5
BCKDHA	lobule vs duct	0.313992	0.309279	0.916726	NS or Estimate < 0.5
BLVRA	lobule vs duct	-0.343287	0.281566	0.911092	NS or Estimate < 0.5
TSPO	lobule vs duct	0.277659	0.326196	0.91821	NS or Estimate < 0.5
CACNA2D1	lobule vs duct	-0.00444538	0.99007	0.99991	NS or Estimate < 0.5
CACNB3	lobule vs duct	0.127699	0.713483	0.982545	NS or Estimate < 0.5
CACNB4	lobule vs duct	0.112894	0.726559	0.984474	NS or Estimate < 0.5
CALCB	lobule vs duct	-0.217406	0.533237	0.96181	NS or Estimate < 0.5
CHRM3	lobule vs duct	0.412254	0.16145	0.86699	NS or Estimate < 0.5
CHRNA3	lobule vs duct	-0.259891	0.377531	0.931084	NS or Estimate < 0.5
CHRNB1	lobule vs duct	-0.022002	0.946913	0.99673	NS or Estimate < 0.5
CHRNB4	lobule vs duct	0.0127496	0.967746	0.998138	NS or Estimate < 0.5
CYP2C8	lobule vs duct	-0.223396	0.571845	0.966692	NS or Estimate < 0.5
CYP2C18	lobule vs duct	0.0706895	0.822848	0.987966	NS or Estimate < 0.5
CYP2E1	lobule vs duct	0.0590065	0.838822	0.988542	NS or Estimate < 0.5
CYP2F1	lobule vs duct	0.0427887	0.890107	0.99418	NS or Estimate < 0.5
CYP27B1	lobule vs duct	-0.44341	0.184631	0.872599	NS or Estimate < 0.5
DCK	lobule vs duct	0.133553	0.565069	0.964317	NS or Estimate < 0.5
DDC	lobule vs duct	0.114752	0.736327	0.985211	NS or Estimate < 0.5
DIO1	lobule vs duct	-0.213393	0.456523	0.949883	NS or Estimate < 0.5
DRD4	lobule vs duct	-0.380849	0.158647	0.86699	NS or Estimate < 0.5
DRD5	lobule vs duct	-0.577638	0.112553	0.854338	NS or Estimate < 0.5
GABRA1	lobule vs duct	0.243694	0.46049	0.949883	NS or Estimate < 0.5
GABRB1	lobule vs duct	0.246755	0.501444	0.954999	NS or Estimate < 0.5
GAD1	lobule vs duct	0.153758	0.684226	0.978588	NS or Estimate < 0.5
GART	lobule vs duct	0.200192	0.56393	0.964317	NS or Estimate < 0.5
GAS6	lobule vs duct	-0.463231	0.234464	0.898455	NS or Estimate < 0.5
GGCX	lobule vs duct	-0.178277	0.622454	0.976256	NS or Estimate < 0.5
GRIA4	lobule vs duct	0.274146	0.298665	0.914337	NS or Estimate < 0.5
GRIK3	lobule vs duct	0.533611	0.100403	0.847757	NS or Estimate < 0.5
GRIN2A	lobule vs duct	0.103351	0.786658	0.986712	NS or Estimate < 0.5
GRIN2B	lobule vs duct	-0.657637	0.00836849	0.615746	P < 0.05
GRINA	lobule vs duct	0.201766	0.429626	0.943641	NS or Estimate < 0.5
GRM4	lobule vs duct	-0.274493	0.372463	0.928448	NS or Estimate < 0.5
GRM6	lobule vs duct	0.439702	0.184429	0.872045	NS or Estimate < 0.5
GSTA2	lobule vs duct	0.773669	0.0183726	0.68569	P < 0.05
GSTM2	lobule vs duct	-0.0219518	0.94805	0.997078	NS or Estimate < 0.5
GSTM3	lobule vs duct	0.158584	0.536692	0.96181	NS or Estimate < 0.5
GSTM4	lobule vs duct	-0.571549	0.0735898	0.814374	NS or Estimate < 0.5
GSTT2	lobule vs duct	0.303471	0.355379	0.926761	NS or Estimate < 0.5
GUK1	lobule vs duct	0.0215955	0.950571	0.997516	NS or Estimate < 0.5
HMGCR	lobule vs duct	0.127625	0.696458	0.98069	NS or Estimate < 0.5
HRH1	lobule vs duct	-0.376734	0.256921	0.902927	NS or Estimate < 0.5
HSD3B1	lobule vs duct	-0.631273	0.051692	0.778973	NS or Estimate < 0.5
HTR1B	lobule vs duct	0.0763981	0.835972	0.987966	NS or Estimate < 0.5
HTR2C	lobule vs duct	-0.332675	0.291366	0.913334	NS or Estimate < 0.5
ICAM2	lobule vs duct	-0.766865	0.0254697	0.725036	P < 0.05
IGF1R	lobule vs duct	-0.0241831	0.921347	0.994961	NS or Estimate < 0.5
IGF2R	lobule vs duct	-0.336444	0.0955815	0.838659	NS or Estimate < 0.5
IL2RB	lobule vs duct	-0.0712627	0.853174	0.991095	NS or Estimate < 0.5
IL7	lobule vs duct	0.0525467	0.859718	0.992144	NS or Estimate < 0.5
IMPDH1	lobule vs duct	0.0532084	0.859749	0.992144	NS or Estimate < 0.5
IMPDH2	lobule vs duct	-0.350659	0.100366	0.847757	NS or Estimate < 0.5
ITGA4	lobule vs duct	0.654563	0.113356	0.854338	NS or Estimate < 0.5
ITGAX	lobule vs duct	0.568217	0.0556322	0.778973	NS or Estimate < 0.5
ITGB6	lobule vs duct	-0.0895419	0.769201	0.986115	NS or Estimate < 0.5
KLKB1	lobule vs duct	-0.181289	0.510433	0.957537	NS or Estimate < 0.5
CYP4F3	lobule vs duct	-0.0537327	0.882237	0.993234	NS or Estimate < 0.5
MAOB	lobule vs duct	-0.0557951	0.873329	0.992144	NS or Estimate < 0.5
NQO2	lobule vs duct	-0.251353	0.284063	0.913334	NS or Estimate < 0.5
NPY	lobule vs duct	-0.196227	0.58827	0.970372	NS or Estimate < 0.5
OXT	lobule vs duct	-0.314897	0.341728	0.922551	NS or Estimate < 0.5
OXTR	lobule vs duct	0.631173	0.0584282	0.787561	NS or Estimate < 0.5
P4HA1	lobule vs duct	0.427229	0.210273	0.890247	NS or Estimate < 0.5
P4HB	lobule vs duct	0.0399166	0.845474	0.989097	NS or Estimate < 0.5
PAM	lobule vs duct	0.0694337	0.805748	0.987966	NS or Estimate < 0.5
PC	lobule vs duct	0.336821	0.260555	0.904569	NS or Estimate < 0.5
PDE4C	lobule vs duct	0.571997	0.0775465	0.815643	NS or Estimate < 0.5
PDHB	lobule vs duct	0.398212	0.229314	0.897505	NS or Estimate < 0.5
PGR	lobule vs duct	0.438382	0.191789	0.876139	NS or Estimate < 0.5
ABCB1	lobule vs duct	0.236071	0.342969	0.922551	NS or Estimate < 0.5
PLA2G1B	lobule vs duct	0.199444	0.518243	0.961095	NS or Estimate < 0.5
PLA2G5	lobule vs duct	-0.383044	0.319599	0.916726	NS or Estimate < 0.5
PLAT	lobule vs duct	0.710604	0.0340371	0.746354	P < 0.05
POLR2A	lobule vs duct	0.237993	0.304054	0.915952	NS or Estimate < 0.5
POLR2B	lobule vs duct	-0.226644	0.5263	0.961095	NS or Estimate < 0.5
POR	lobule vs duct	0.545098	0.140032	0.863244	NS or Estimate < 0.5
PPIB	lobule vs duct	-0.0987641	0.785583	0.986712	NS or Estimate < 0.5
PPIC	lobule vs duct	0.485699	0.178168	0.869022	NS or Estimate < 0.5
PPP3R1	lobule vs duct	-0.465218	0.0773887	0.815643	NS or Estimate < 0.5
PRRG1	lobule vs duct	-0.276638	0.38953	0.934909	NS or Estimate < 0.5
PTGDR	lobule vs duct	0.327124	0.245595	0.90203	NS or Estimate < 0.5
PTGDS	lobule vs duct	0.247806	0.465487	0.950909	NS or Estimate < 0.5
PTGER2	lobule vs duct	0.141792	0.690898	0.979165	NS or Estimate < 0.5
PTGER3	lobule vs duct	0.237949	0.497817	0.954731	NS or Estimate < 0.5
PTGS2	lobule vs duct	0.110013	0.673754	0.977911	NS or Estimate < 0.5
RARB	lobule vs duct	0.385725	0.275486	0.907941	NS or Estimate < 0.5
RPL4	lobule vs duct	0.014941	0.900084	0.994961	NS or Estimate < 0.5
RPL5	lobule vs duct	-0.0419135	0.744466	0.986115	NS or Estimate < 0.5
RPL6	lobule vs duct	-0.102595	0.226248	0.897302	NS or Estimate < 0.5
RPL7	lobule vs duct	-0.343573	0.0548367	0.778973	NS or Estimate < 0.5
RPL7A	lobule vs duct	-0.111354	0.407133	0.940111	NS or Estimate < 0.5
RPL12	lobule vs duct	-0.197813	0.175262	0.86699	NS or Estimate < 0.5
RPL23	lobule vs duct	-0.250107	0.148262	0.86699	NS or Estimate < 0.5
RPL18A	lobule vs duct	-0.0960199	0.489037	0.953765	NS or Estimate < 0.5
RPL19	lobule vs duct	0.0203348	0.84256	0.988571	NS or Estimate < 0.5
RPL21	lobule vs duct	-0.0341749	0.731515	0.984474	NS or Estimate < 0.5
RPL17	lobule vs duct	-0.304431	0.114574	0.854338	NS or Estimate < 0.5
RPL24	lobule vs duct	-0.125381	0.507653	0.956561	NS or Estimate < 0.5
RPL26	lobule vs duct	-0.111058	0.253873	0.902502	NS or Estimate < 0.5
RPL27	lobule vs duct	0.00251756	0.985694	0.999774	NS or Estimate < 0.5
RPL30	lobule vs duct	-0.070313	0.625051	0.976256	NS or Estimate < 0.5
RPL28	lobule vs duct	-0.140275	0.265513	0.906983	NS or Estimate < 0.5
RPL29	lobule vs duct	-0.228882	0.081684	0.82067	NS or Estimate < 0.5
RPL34	lobule vs duct	-0.0278519	0.77351	0.986115	NS or Estimate < 0.5
RPL35A	lobule vs duct	-0.231909	0.0786565	0.815643	NS or Estimate < 0.5
RPL37	lobule vs duct	-0.269138	0.00758252	0.608835	NS or Estimate < 0.5
RPL37A	lobule vs duct	-0.171679	0.116093	0.854338	NS or Estimate < 0.5
RPL39	lobule vs duct	-0.138791	0.24288	0.901983	NS or Estimate < 0.5
RPL36AL	lobule vs duct	0.0179787	0.949183	0.997273	NS or Estimate < 0.5
SLC2A9	lobule vs duct	-0.487492	0.105843	0.854338	NS or Estimate < 0.5
CLDN20	lobule vs duct	-0.559935	0.0588696	0.789595	NS or Estimate < 0.5
CD44	lobule vs duct	0.20229	0.39126	0.935336	NS or Estimate < 0.5
TSR3	lobule vs duct	-0.479296	0.196421	0.876417	NS or Estimate < 0.5
NCCRP1	lobule vs duct	-0.0768285	0.83493	0.987966	NS or Estimate < 0.5
STX16	lobule vs duct	-0.242257	0.323711	0.917495	NS or Estimate < 0.5
UBE2W	lobule vs duct	-0.0608196	0.831591	0.987966	NS or Estimate < 0.5
NDUFV3	lobule vs duct	0.103259	0.740232	0.985505	NS or Estimate < 0.5
RORC	lobule vs duct	0.316163	0.180669	0.870539	NS or Estimate < 0.5
TM6SF2	lobule vs duct	-0.755813	0.0397546	0.761804	P < 0.05
GRB10	lobule vs duct	0.556447	0.14688	0.86699	NS or Estimate < 0.5
GDF6	lobule vs duct	0.323153	0.191343	0.876139	NS or Estimate < 0.5
GGA1	lobule vs duct	0.0271524	0.946942	0.99673	NS or Estimate < 0.5
ALKBH2	lobule vs duct	0.0473366	0.865537	0.992144	NS or Estimate < 0.5
OR2Y1	lobule vs duct	-0.478022	0.161984	0.86699	NS or Estimate < 0.5
OR2A14	lobule vs duct	0.345334	0.156938	0.86699	NS or Estimate < 0.5
ETFRF1	lobule vs duct	0.132692	0.649863	0.976256	NS or Estimate < 0.5
ZNF425	lobule vs duct	0.258114	0.462487	0.949883	NS or Estimate < 0.5
SPOPL	lobule vs duct	0.389933	0.167731	0.86699	NS or Estimate < 0.5
ZNF470	lobule vs duct	0.454436	0.0588929	0.789595	NS or Estimate < 0.5
ARHGEF37	lobule vs duct	0.262854	0.379977	0.931646	NS or Estimate < 0.5
MED11	lobule vs duct	-0.100434	0.74383	0.986115	NS or Estimate < 0.5
C4orf3	lobule vs duct	0.0778962	0.773627	0.986115	NS or Estimate < 0.5
ATP1B1	lobule vs duct	-0.118985	0.541471	0.961946	NS or Estimate < 0.5
TOMM5	lobule vs duct	-0.0607095	0.871025	0.992144	NS or Estimate < 0.5
DENND6B	lobule vs duct	-0.366478	0.278848	0.910289	NS or Estimate < 0.5
C8orf82	lobule vs duct	-0.466697	0.125718	0.858492	NS or Estimate < 0.5
OR2T27	lobule vs duct	-0.809286	0.0424221	0.77139	P < 0.05
OR2T35	lobule vs duct	-0.4373	0.217029	0.893342	NS or Estimate < 0.5
STX19	lobule vs duct	0.312516	0.337041	0.921005	NS or Estimate < 0.5
PIM3	lobule vs duct	-0.287143	0.47709	0.951304	NS or Estimate < 0.5
TTC3	lobule vs duct	-0.250956	0.266871	0.906983	NS or Estimate < 0.5
OR4C15	lobule vs duct	-0.133564	0.708599	0.982545	NS or Estimate < 0.5
PPARA	lobule vs duct	0.0716768	0.826481	0.987966	NS or Estimate < 0.5
AFAP1L2	lobule vs duct	0.473713	0.101239	0.847757	NS or Estimate < 0.5
ATP5F1A	lobule vs duct	-0.51168	0.122719	0.857185	NS or Estimate < 0.5
OR4C13	lobule vs duct	-0.258178	0.36753	0.928448	NS or Estimate < 0.5
PLEKHA1	lobule vs duct	0.201295	0.46399	0.950185	NS or Estimate < 0.5
PAMR1	lobule vs duct	0.471671	0.156389	0.86699	NS or Estimate < 0.5
EXOSC10	lobule vs duct	0.0491783	0.881534	0.993234	NS or Estimate < 0.5
RPLP0	lobule vs duct	-0.25771	0.0428203	0.77139	NS or Estimate < 0.5
GMPR2	lobule vs duct	-0.0413037	0.911021	0.994961	NS or Estimate < 0.5
HCFC1R1	lobule vs duct	0.151865	0.582742	0.969923	NS or Estimate < 0.5
PFKL	lobule vs duct	0.544102	0.0637266	0.796953	NS or Estimate < 0.5
ATP5MC1	lobule vs duct	0.100419	0.825658	0.987966	NS or Estimate < 0.5
C4B	lobule vs duct	0.622281	0.0388522	0.75973	P < 0.05
ECHDC1	lobule vs duct	-0.156364	0.629351	0.976256	NS or Estimate < 0.5
ATP5MC2	lobule vs duct	0.237448	0.197177	0.876417	NS or Estimate < 0.5
DEFB108B	lobule vs duct	-0.479849	0.0921769	0.836048	NS or Estimate < 0.5
ASTL	lobule vs duct	0.235311	0.525275	0.961095	NS or Estimate < 0.5
AFTPH	lobule vs duct	0.0446057	0.892892	0.994806	NS or Estimate < 0.5
SUMO4	lobule vs duct	0.032491	0.891409	0.994543	NS or Estimate < 0.5
LCLAT1	lobule vs duct	-0.12361	0.653696	0.976256	NS or Estimate < 0.5
ATP5MC3	lobule vs duct	-0.311514	0.153275	0.86699	NS or Estimate < 0.5
EPSTI1	lobule vs duct	-0.184433	0.45942	0.949883	NS or Estimate < 0.5
EXOSC3	lobule vs duct	-0.317654	0.404089	0.939436	NS or Estimate < 0.5
GATA3	lobule vs duct	0.338617	0.117579	0.854338	NS or Estimate < 0.5
SFR1	lobule vs duct	0.0181315	0.95757	0.997611	NS or Estimate < 0.5
ZNF787	lobule vs duct	0.296611	0.283637	0.912865	NS or Estimate < 0.5
ANXA2	lobule vs duct	0.609873	0.00450846	0.544945	P < 0.05
THOC5	lobule vs duct	0.0445041	0.889537	0.99418	NS or Estimate < 0.5
CBY1	lobule vs duct	0.471629	0.144414	0.866148	NS or Estimate < 0.5
OR8G1	lobule vs duct	-0.132741	0.67864	0.977911	NS or Estimate < 0.5
PTRH1	lobule vs duct	0.350285	0.304456	0.915952	NS or Estimate < 0.5
KCTD11	lobule vs duct	0.219563	0.509149	0.957212	NS or Estimate < 0.5
ALKAL2	lobule vs duct	0.128822	0.673967	0.977911	NS or Estimate < 0.5
TWISTNB	lobule vs duct	-0.439709	0.185391	0.873665	NS or Estimate < 0.5
RPLP1	lobule vs duct	-0.0596164	0.677095	0.977911	NS or Estimate < 0.5
BICD1	lobule vs duct	0.785411	0.0172427	0.675888	P < 0.05
SMAD2	lobule vs duct	0.180888	0.48029	0.952771	NS or Estimate < 0.5
LDLRAD4	lobule vs duct	0.394085	0.130436	0.858492	NS or Estimate < 0.5
HMGXB4	lobule vs duct	0.454419	0.231448	0.897568	NS or Estimate < 0.5
UQCR10	lobule vs duct	0.00204969	0.994769	0.99991	NS or Estimate < 0.5
BRPF1	lobule vs duct	0.862355	0.0137364	0.648354	P < 0.05
ARHGEF35	lobule vs duct	-0.167814	0.64879	0.976256	NS or Estimate < 0.5
ATP5PF	lobule vs duct	-0.646988	0.0667515	0.799939	NS or Estimate < 0.5
MTFP1	lobule vs duct	-0.255639	0.444256	0.947109	NS or Estimate < 0.5
GLE1	lobule vs duct	-0.1347	0.720723	0.984474	NS or Estimate < 0.5
ERLIN2	lobule vs duct	0.0832602	0.778572	0.986115	NS or Estimate < 0.5
RBMS3	lobule vs duct	-0.341061	0.438048	0.944861	NS or Estimate < 0.5
GTF2IRD2B	lobule vs duct	0.592221	0.0883061	0.835544	NS or Estimate < 0.5
SMARCD3	lobule vs duct	0.151888	0.649511	0.976256	NS or Estimate < 0.5
DMAC2L	lobule vs duct	0.524723	0.110702	0.854338	NS or Estimate < 0.5
SP5	lobule vs duct	0.0827554	0.828778	0.987966	NS or Estimate < 0.5
MED15	lobule vs duct	-0.313851	0.311851	0.916726	NS or Estimate < 0.5
MANBAL	lobule vs duct	0.579203	0.102861	0.851584	NS or Estimate < 0.5
TXNDC8	lobule vs duct	-0.0705518	0.808098	0.987966	NS or Estimate < 0.5
BMF	lobule vs duct	-0.082012	0.822036	0.987966	NS or Estimate < 0.5
RPLP2	lobule vs duct	-0.0387765	0.736413	0.985211	NS or Estimate < 0.5
NOMO3	lobule vs duct	-0.117089	0.745204	0.986115	NS or Estimate < 0.5
GRK6	lobule vs duct	0.139151	0.758132	0.986115	NS or Estimate < 0.5
OR10AD1	lobule vs duct	0.387475	0.306593	0.916726	NS or Estimate < 0.5
OR52M1	lobule vs duct	0.072091	0.790566	0.986981	NS or Estimate < 0.5
ZNF740	lobule vs duct	0.0584108	0.865781	0.992144	NS or Estimate < 0.5
RTP2	lobule vs duct	0.221882	0.337552	0.921005	NS or Estimate < 0.5
TMEM220	lobule vs duct	0.270488	0.412191	0.941085	NS or Estimate < 0.5
VHLL	lobule vs duct	-0.160609	0.684805	0.978588	NS or Estimate < 0.5
ZNF705A	lobule vs duct	-0.399802	0.156979	0.86699	NS or Estimate < 0.5
RNASEK	lobule vs duct	-0.390959	0.189446	0.874687	NS or Estimate < 0.5
ETV3L	lobule vs duct	0.271076	0.291452	0.913334	NS or Estimate < 0.5
TRIM67	lobule vs duct	-0.282304	0.482046	0.953121	NS or Estimate < 0.5
SPDYE3	lobule vs duct	-0.233405	0.332613	0.920296	NS or Estimate < 0.5
METRNL	lobule vs duct	-0.0235607	0.953515	0.997609	NS or Estimate < 0.5
LINGO4	lobule vs duct	0.369341	0.295379	0.913334	NS or Estimate < 0.5
OR1B1	lobule vs duct	-0.0708304	0.811423	0.987966	NS or Estimate < 0.5
OR1J1	lobule vs duct	-0.061177	0.858618	0.992144	NS or Estimate < 0.5
OR1J4	lobule vs duct	-0.422686	0.189501	0.874687	NS or Estimate < 0.5
OR1L8	lobule vs duct	-0.154316	0.637642	0.976256	NS or Estimate < 0.5
OR1N2	lobule vs duct	0.0824722	0.766367	0.986115	NS or Estimate < 0.5
OR10J5	lobule vs duct	0.0536268	0.85578	0.99113	NS or Estimate < 0.5
OR10R2	lobule vs duct	0.339605	0.390793	0.935336	NS or Estimate < 0.5
OR10T2	lobule vs duct	0.556895	0.187198	0.873665	NS or Estimate < 0.5
OR13C8	lobule vs duct	-0.72705	0.0379813	0.75973	P < 0.05
OR2B11	lobule vs duct	0.288554	0.429816	0.943641	NS or Estimate < 0.5
OR2M2	lobule vs duct	-0.19339	0.582751	0.969923	NS or Estimate < 0.5
OR2T12	lobule vs duct	0.387155	0.24905	0.90203	NS or Estimate < 0.5
OR4C3	lobule vs duct	0.0565998	0.870708	0.992144	NS or Estimate < 0.5
OR4C46	lobule vs duct	-0.453038	0.223415	0.897302	NS or Estimate < 0.5
OR4D2	lobule vs duct	0.0601047	0.867904	0.992144	NS or Estimate < 0.5
OR4D6	lobule vs duct	0.13366	0.611159	0.975348	NS or Estimate < 0.5
OR4D9	lobule vs duct	0.155753	0.610024	0.975348	NS or Estimate < 0.5
OR4M2	lobule vs duct	-0.342067	0.317531	0.916726	NS or Estimate < 0.5
NCK2	lobule vs duct	0.0348721	0.863906	0.992144	NS or Estimate < 0.5
OR4N5	lobule vs duct	0.16373	0.697674	0.98081	NS or Estimate < 0.5
OR5A1	lobule vs duct	-0.18947	0.598392	0.97334	NS or Estimate < 0.5
OR5L1	lobule vs duct	0.441824	0.195613	0.876417	NS or Estimate < 0.5
OR5T1	lobule vs duct	0.447811	0.23004	0.897568	NS or Estimate < 0.5
OR51A2	lobule vs duct	-0.418686	0.170354	0.86699	NS or Estimate < 0.5
OR51D1	lobule vs duct	0.186359	0.573164	0.966953	NS or Estimate < 0.5
OR51L1	lobule vs duct	0.155337	0.625391	0.976256	NS or Estimate < 0.5
OR51S1	lobule vs duct	0.113563	0.710915	0.982545	NS or Estimate < 0.5
RPS3	lobule vs duct	-0.109622	0.322571	0.916726	NS or Estimate < 0.5
SFMBT1	lobule vs duct	0.254082	0.412654	0.941085	NS or Estimate < 0.5
OR52E2	lobule vs duct	0.0170491	0.957201	0.997611	NS or Estimate < 0.5
OR52E4	lobule vs duct	0.125763	0.71664	0.982964	NS or Estimate < 0.5
OR52E8	lobule vs duct	-0.173527	0.573204	0.966953	NS or Estimate < 0.5
OR52I2	lobule vs duct	-0.193773	0.597518	0.97334	NS or Estimate < 0.5
OR52L1	lobule vs duct	0.508699	0.159608	0.86699	NS or Estimate < 0.5
OR56A4	lobule vs duct	0.117474	0.738133	0.985211	NS or Estimate < 0.5
OR7A10	lobule vs duct	-0.472928	0.224271	0.897302	NS or Estimate < 0.5
OR8K3	lobule vs duct	-0.332791	0.355268	0.926761	NS or Estimate < 0.5
OR8J1	lobule vs duct	0.0848991	0.803387	0.987966	NS or Estimate < 0.5
TMEM198	lobule vs duct	-0.0788073	0.758433	0.986115	NS or Estimate < 0.5
OR9Q1	lobule vs duct	-0.231097	0.474714	0.951304	NS or Estimate < 0.5
FRG2	lobule vs duct	0.133975	0.714964	0.982545	NS or Estimate < 0.5
OR9K2	lobule vs duct	0.921433	0.0126721	0.626509	P < 0.05
OR4C12	lobule vs duct	0.34149	0.226271	0.897302	NS or Estimate < 0.5
CHD3	lobule vs duct	-0.0127077	0.954007	0.997609	NS or Estimate < 0.5
OR6B1	lobule vs duct	0.0280245	0.926082	0.994961	NS or Estimate < 0.5
OR9Q2	lobule vs duct	0.644102	0.0411219	0.762314	P < 0.05
OR9G4	lobule vs duct	0.0967242	0.682875	0.978588	NS or Estimate < 0.5
SREBF1	lobule vs duct	-0.176683	0.53233	0.96181	NS or Estimate < 0.5
HNRNPL	lobule vs duct	0.271299	0.273371	0.907759	NS or Estimate < 0.5
RGS10	lobule vs duct	0.586794	0.121216	0.856768	NS or Estimate < 0.5
AK4	lobule vs duct	0.742525	0.0312342	0.743721	P < 0.05
KDM2B	lobule vs duct	-0.131951	0.679075	0.977911	NS or Estimate < 0.5
ZNF32	lobule vs duct	-0.0170587	0.956231	0.997611	NS or Estimate < 0.5
ACTR2	lobule vs duct	0.730261	0.0418388	0.76815	P < 0.05
NFASC	lobule vs duct	0.0188651	0.940387	0.996677	NS or Estimate < 0.5
SF3A1	lobule vs duct	0.440046	0.169566	0.86699	NS or Estimate < 0.5
MARCHF2	lobule vs duct	0.612802	0.0210165	0.706556	P < 0.05
B4GALT2	lobule vs duct	0.0804463	0.803639	0.987966	NS or Estimate < 0.5
OR10G3	lobule vs duct	-0.275933	0.365855	0.928448	NS or Estimate < 0.5
OR5B3	lobule vs duct	0.0888538	0.788251	0.986712	NS or Estimate < 0.5
OR4B1	lobule vs duct	-0.00242995	0.994477	0.99991	NS or Estimate < 0.5
NFKBIZ	lobule vs duct	0.0837719	0.616203	0.976256	NS or Estimate < 0.5
OR2A2	lobule vs duct	0.122892	0.696252	0.98069	NS or Estimate < 0.5
OR4K15	lobule vs duct	0.202756	0.599501	0.973641	NS or Estimate < 0.5
OR5D16	lobule vs duct	0.105774	0.787482	0.986712	NS or Estimate < 0.5
OR6C75	lobule vs duct	-0.248398	0.547563	0.963227	NS or Estimate < 0.5
OR6C70	lobule vs duct	-0.0138051	0.96085	0.997611	NS or Estimate < 0.5
CPM	lobule vs duct	0.0163838	0.960437	0.997611	NS or Estimate < 0.5
OR4F21	lobule vs duct	-0.257795	0.463951	0.950185	NS or Estimate < 0.5
OR4A47	lobule vs duct	0.268243	0.222791	0.897302	NS or Estimate < 0.5
OR6C65	lobule vs duct	0.619722	0.0569629	0.778973	NS or Estimate < 0.5
SF3B1	lobule vs duct	0.0211888	0.923025	0.994961	NS or Estimate < 0.5
OR5B2	lobule vs duct	0.0691919	0.820547	0.987966	NS or Estimate < 0.5
ITGB4	lobule vs duct	0.268619	0.172856	0.86699	NS or Estimate < 0.5
CHEK2	lobule vs duct	-0.419469	0.227492	0.897302	NS or Estimate < 0.5
VPS54	lobule vs duct	0.205487	0.507648	0.956561	NS or Estimate < 0.5
GBA	lobule vs duct	-0.208921	0.452442	0.949445	NS or Estimate < 0.5
NUMB	lobule vs duct	0.698778	0.0569473	0.778973	NS or Estimate < 0.5
ADAM9	lobule vs duct	0.631931	0.0477501	0.77139	P < 0.05
ZNF780B	lobule vs duct	-0.0786251	0.757216	0.986115	NS or Estimate < 0.5
ATP8B2	lobule vs duct	0.36986	0.358916	0.927367	NS or Estimate < 0.5
ERBB2	lobule vs duct	0.374691	0.133413	0.858492	NS or Estimate < 0.5
IP6K2	lobule vs duct	-0.113772	0.675078	0.977911	NS or Estimate < 0.5
ERBB3	lobule vs duct	0.352471	0.262201	0.905491	NS or Estimate < 0.5
KRTAP5-1	lobule vs duct	0.09583	0.74592	0.986115	NS or Estimate < 0.5
RPS3A	lobule vs duct	-0.192713	0.114577	0.854338	NS or Estimate < 0.5
YBEY	lobule vs duct	0.905075	0.00471095	0.544945	P < 0.05
LRRC37A2	lobule vs duct	0.18284	0.548175	0.963227	NS or Estimate < 0.5
TCEAL9	lobule vs duct	0.0523436	0.86602	0.992144	NS or Estimate < 0.5
ARHGAP17	lobule vs duct	0.0568539	0.827912	0.987966	NS or Estimate < 0.5
TCEAL1	lobule vs duct	0.600644	0.0948306	0.838659	NS or Estimate < 0.5
SLC25A25	lobule vs duct	0.437977	0.185149	0.87363	NS or Estimate < 0.5
SPIN2B	lobule vs duct	0.0894998	0.765949	0.986115	NS or Estimate < 0.5
TCEAL4	lobule vs duct	0.00667287	0.984827	0.999774	NS or Estimate < 0.5
TCEAL6	lobule vs duct	0.13596	0.725025	0.984474	NS or Estimate < 0.5
LRRC18	lobule vs duct	-0.264213	0.441648	0.947091	NS or Estimate < 0.5
ALG3	lobule vs duct	-0.260842	0.443148	0.947109	NS or Estimate < 0.5
LRIF1	lobule vs duct	0.286195	0.321302	0.916726	NS or Estimate < 0.5
RPS4X	lobule vs duct	0.0314475	0.720099	0.984261	NS or Estimate < 0.5
ATN1	lobule vs duct	0.15008	0.6591	0.976256	NS or Estimate < 0.5
SDCBP	lobule vs duct	-0.0844336	0.765239	0.986115	NS or Estimate < 0.5
KLHL5	lobule vs duct	0.366928	0.274597	0.907759	NS or Estimate < 0.5
C8orf48	lobule vs duct	-0.0861088	0.787756	0.986712	NS or Estimate < 0.5
NTRK2	lobule vs duct	0.72377	0.0156459	0.674985	P < 0.05
SCP2	lobule vs duct	-0.111022	0.757321	0.986115	NS or Estimate < 0.5
ZNF483	lobule vs duct	-0.123423	0.690623	0.979165	NS or Estimate < 0.5
IGIP	lobule vs duct	0.0309012	0.924548	0.994961	NS or Estimate < 0.5
IGF2BP2	lobule vs duct	0.264804	0.196042	0.876417	NS or Estimate < 0.5
SPOP	lobule vs duct	0.0333318	0.918506	0.994961	NS or Estimate < 0.5
BRWD1	lobule vs duct	0.032903	0.895335	0.994961	NS or Estimate < 0.5
ERV3-1	lobule vs duct	-0.00998402	0.977869	0.999465	NS or Estimate < 0.5
SETD4	lobule vs duct	0.174808	0.596865	0.973137	NS or Estimate < 0.5
GEMIN7	lobule vs duct	0.241142	0.378059	0.931084	NS or Estimate < 0.5
EI24	lobule vs duct	0.114524	0.715143	0.982545	NS or Estimate < 0.5
RASL10A	lobule vs duct	-0.195208	0.680832	0.977974	NS or Estimate < 0.5
RWDD1	lobule vs duct	0.387963	0.180803	0.870539	NS or Estimate < 0.5
TULP4	lobule vs duct	-0.0528609	0.883656	0.993234	NS or Estimate < 0.5
HCST	lobule vs duct	0.0361331	0.914763	0.994961	NS or Estimate < 0.5
TRPM3	lobule vs duct	-0.103024	0.706799	0.982545	NS or Estimate < 0.5
LMBRD2	lobule vs duct	0.436057	0.228508	0.897302	NS or Estimate < 0.5
SS18	lobule vs duct	-0.097862	0.731469	0.984474	NS or Estimate < 0.5
IRGQ	lobule vs duct	0.0700016	0.803187	0.987966	NS or Estimate < 0.5
TFG	lobule vs duct	-0.00984682	0.957437	0.997611	NS or Estimate < 0.5
OPTN	lobule vs duct	-0.350252	0.328721	0.919178	NS or Estimate < 0.5
COA5	lobule vs duct	0.138829	0.60139	0.974047	NS or Estimate < 0.5
C18orf25	lobule vs duct	-0.1302	0.708838	0.982545	NS or Estimate < 0.5
TRIM72	lobule vs duct	0.0930522	0.788196	0.986712	NS or Estimate < 0.5
CISD2	lobule vs duct	0.114099	0.658218	0.976256	NS or Estimate < 0.5
C4orf46	lobule vs duct	-0.306347	0.117857	0.854338	NS or Estimate < 0.5
EID3	lobule vs duct	0.433961	0.199213	0.876417	NS or Estimate < 0.5
LAMTOR4	lobule vs duct	-0.125394	0.610334	0.975348	NS or Estimate < 0.5
GPX8	lobule vs duct	0.161457	0.518694	0.961095	NS or Estimate < 0.5
ZNF761	lobule vs duct	-0.0203776	0.929231	0.994961	NS or Estimate < 0.5
STEAP3	lobule vs duct	0.382431	0.218191	0.894895	NS or Estimate < 0.5
SLC41A3	lobule vs duct	-0.336553	0.340463	0.922551	NS or Estimate < 0.5
KLF6	lobule vs duct	0.458991	0.161203	0.86699	NS or Estimate < 0.5
SEPTIN2	lobule vs duct	0.0335363	0.896522	0.994961	NS or Estimate < 0.5
TMEM64	lobule vs duct	-0.357283	0.47687	0.951304	NS or Estimate < 0.5
LGMN	lobule vs duct	0.175107	0.62342	0.976256	NS or Estimate < 0.5
SLC7A2	lobule vs duct	-0.412412	0.280828	0.910698	NS or Estimate < 0.5
MXI1	lobule vs duct	0.0377019	0.914591	0.994961	NS or Estimate < 0.5
KYAT3	lobule vs duct	-0.361285	0.267862	0.906983	NS or Estimate < 0.5
TFIP11	lobule vs duct	-0.000773691	0.99814	0.99991	NS or Estimate < 0.5
ADGRL1	lobule vs duct	0.0691441	0.834592	0.987966	NS or Estimate < 0.5
RBPMS	lobule vs duct	0.364734	0.169552	0.86699	NS or Estimate < 0.5
CFAP58	lobule vs duct	-0.0243796	0.92371	0.994961	NS or Estimate < 0.5
WDR89	lobule vs duct	-0.436711	0.148765	0.86699	NS or Estimate < 0.5
ZNF121	lobule vs duct	0.430884	0.116703	0.854338	NS or Estimate < 0.5
FNIP1	lobule vs duct	-0.0775158	0.801732	0.987966	NS or Estimate < 0.5
SULT1C3	lobule vs duct	0.125637	0.746147	0.986115	NS or Estimate < 0.5
TDP1	lobule vs duct	0.0902218	0.77455	0.986115	NS or Estimate < 0.5
RAB19	lobule vs duct	-0.179377	0.560347	0.963227	NS or Estimate < 0.5
CCT3	lobule vs duct	-0.504527	0.0326761	0.746354	P < 0.05
DSP	lobule vs duct	0.392526	0.131269	0.858492	NS or Estimate < 0.5
NIPA2	lobule vs duct	0.422145	0.149204	0.86699	NS or Estimate < 0.5
TCP1	lobule vs duct	-0.245115	0.450474	0.948803	NS or Estimate < 0.5
PPP2CB	lobule vs duct	0.406569	0.198124	0.876417	NS or Estimate < 0.5
SH3D19	lobule vs duct	0.233984	0.474185	0.951304	NS or Estimate < 0.5
CDKL4	lobule vs duct	0.241483	0.319849	0.916726	NS or Estimate < 0.5
CLSTN1	lobule vs duct	-0.312285	0.225967	0.897302	NS or Estimate < 0.5
CADPS2	lobule vs duct	0.301474	0.32994	0.919178	NS or Estimate < 0.5
ARMCX6	lobule vs duct	-0.226136	0.551999	0.963227	NS or Estimate < 0.5
SLX4IP	lobule vs duct	0.179274	0.597968	0.97334	NS or Estimate < 0.5
C20orf202	lobule vs duct	0.23339	0.461171	0.949883	NS or Estimate < 0.5
SPANXN5	lobule vs duct	0.12168	0.707305	0.982545	NS or Estimate < 0.5
BRD9	lobule vs duct	0.53341	0.141298	0.863579	NS or Estimate < 0.5
KIAA0930	lobule vs duct	-0.0222176	0.949353	0.997273	NS or Estimate < 0.5
TMEM230	lobule vs duct	0.386408	0.203921	0.882914	NS or Estimate < 0.5
DNASE1L1	lobule vs duct	0.378397	0.252596	0.902126	NS or Estimate < 0.5
ANKRD16	lobule vs duct	-0.258344	0.41266	0.941085	NS or Estimate < 0.5
PKD1	lobule vs duct	-0.0050897	0.983906	0.999774	NS or Estimate < 0.5
SSBP3	lobule vs duct	0.121338	0.661266	0.976256	NS or Estimate < 0.5
SYTL3	lobule vs duct	-0.309549	0.304047	0.915952	NS or Estimate < 0.5
FAM168B	lobule vs duct	-0.0493683	0.888293	0.99418	NS or Estimate < 0.5
C10orf62	lobule vs duct	0.246097	0.415063	0.94146	NS or Estimate < 0.5
SSBP4	lobule vs duct	0.149594	0.614554	0.976256	NS or Estimate < 0.5
RPS6	lobule vs duct	-0.225081	0.0387529	0.75973	NS or Estimate < 0.5
LRRC38	lobule vs duct	0.471333	0.197532	0.876417	NS or Estimate < 0.5
ZNF766	lobule vs duct	0.376133	0.321557	0.916726	NS or Estimate < 0.5
TTC7B	lobule vs duct	-0.320441	0.381866	0.931646	NS or Estimate < 0.5
PIK3R6	lobule vs duct	0.350403	0.288847	0.913334	NS or Estimate < 0.5
SAMD15	lobule vs duct	0.229688	0.48828	0.953765	NS or Estimate < 0.5
SPIN3	lobule vs duct	-0.19426	0.517537	0.961095	NS or Estimate < 0.5
IBA57	lobule vs duct	0.290741	0.276402	0.909533	NS or Estimate < 0.5
TDRD6	lobule vs duct	-0.191517	0.576037	0.968669	NS or Estimate < 0.5
TMEM244	lobule vs duct	0.403708	0.180623	0.870539	NS or Estimate < 0.5
ACER2	lobule vs duct	0.341956	0.279951	0.910634	NS or Estimate < 0.5
PRAMEF6	lobule vs duct	-0.12796	0.477176	0.951304	NS or Estimate < 0.5
MTX3	lobule vs duct	-0.290675	0.391096	0.935336	NS or Estimate < 0.5
ERCC6L2	lobule vs duct	-0.040832	0.890093	0.99418	NS or Estimate < 0.5
SLC6A17	lobule vs duct	-0.409701	0.154648	0.86699	NS or Estimate < 0.5
C6orf58	lobule vs duct	-0.294221	0.34355	0.922551	NS or Estimate < 0.5
MUC21	lobule vs duct	-0.237918	0.509006	0.957212	NS or Estimate < 0.5
GOLGA7B	lobule vs duct	0.209035	0.502797	0.954999	NS or Estimate < 0.5
THEMIS	lobule vs duct	0.0342998	0.916845	0.994961	NS or Estimate < 0.5
RAP1A	lobule vs duct	0.340027	0.28038	0.910698	NS or Estimate < 0.5
LIPJ	lobule vs duct	0.201809	0.515064	0.959637	NS or Estimate < 0.5
RAP1B	lobule vs duct	-0.03648	0.869399	0.992144	NS or Estimate < 0.5
LDLRAD1	lobule vs duct	-0.117214	0.683816	0.978588	NS or Estimate < 0.5
C1orf189	lobule vs duct	0.667759	0.0206055	0.705173	P < 0.05
MYBPHL	lobule vs duct	0.312995	0.354043	0.926354	NS or Estimate < 0.5
HERPUD1	lobule vs duct	0.333447	0.309407	0.916726	NS or Estimate < 0.5
FYTTD1	lobule vs duct	-0.174607	0.555657	0.963227	NS or Estimate < 0.5
MAGEA10	lobule vs duct	-0.169985	0.613668	0.976256	NS or Estimate < 0.5
MAGEA4	lobule vs duct	0.145183	0.684639	0.978588	NS or Estimate < 0.5
C1GALT1C1	lobule vs duct	0.569543	0.0368748	0.75973	P < 0.05
SLC13A3	lobule vs duct	0.419627	0.206386	0.887228	NS or Estimate < 0.5
ZMAT1	lobule vs duct	-0.207316	0.60766	0.975028	NS or Estimate < 0.5
MCCD1	lobule vs duct	0.116574	0.737913	0.985211	NS or Estimate < 0.5
OLA1	lobule vs duct	-0.0653775	0.800249	0.987966	NS or Estimate < 0.5
PNLIPRP3	lobule vs duct	-0.03409	0.913829	0.994961	NS or Estimate < 0.5
BTBD1	lobule vs duct	0.118288	0.730644	0.984474	NS or Estimate < 0.5
RPS8	lobule vs duct	-0.230423	0.0306323	0.743721	NS or Estimate < 0.5
MSL1	lobule vs duct	0.693014	0.0426421	0.77139	P < 0.05
PRAMEF8	lobule vs duct	-0.155561	0.571682	0.966607	NS or Estimate < 0.5
ROPN1B	lobule vs duct	0.0392513	0.905284	0.994961	NS or Estimate < 0.5
NTRK3	lobule vs duct	-0.33644	0.293683	0.913334	NS or Estimate < 0.5
DNAJC21	lobule vs duct	-0.166714	0.538066	0.96181	NS or Estimate < 0.5
TRIM61	lobule vs duct	-0.100736	0.75846	0.986115	NS or Estimate < 0.5
MYLK4	lobule vs duct	-0.677899	0.0537374	0.778973	NS or Estimate < 0.5
FOXP4	lobule vs duct	0.850168	0.00922126	0.621525	P < 0.05
SEC61G	lobule vs duct	-0.222309	0.427833	0.943641	NS or Estimate < 0.5
KRTAP5-7	lobule vs duct	0.445359	0.16881	0.86699	NS or Estimate < 0.5
SLC45A2	lobule vs duct	0.826535	0.135512	0.859959	NS or Estimate < 0.5
GRP	lobule vs duct	-0.162639	0.653424	0.976256	NS or Estimate < 0.5
ITM2C	lobule vs duct	0.151822	0.668928	0.976256	NS or Estimate < 0.5
DCTD	lobule vs duct	0.0409475	0.913054	0.994961	NS or Estimate < 0.5
ABI1	lobule vs duct	-0.0824675	0.807783	0.987966	NS or Estimate < 0.5
NHLRC3	lobule vs duct	-0.198344	0.526271	0.961095	NS or Estimate < 0.5
ZNF260	lobule vs duct	-0.135474	0.650197	0.976256	NS or Estimate < 0.5
NUDT17	lobule vs duct	0.337455	0.243509	0.901999	NS or Estimate < 0.5
RGMB	lobule vs duct	0.25317	0.493935	0.954392	NS or Estimate < 0.5
DDX60L	lobule vs duct	0.253021	0.521249	0.961095	NS or Estimate < 0.5
SPIN4	lobule vs duct	-1.01568	0.0453942	0.77139	P < 0.05
LRRC73	lobule vs duct	0.126228	0.703562	0.982405	NS or Estimate < 0.5
TCEAL5	lobule vs duct	-0.00511273	0.987858	0.999774	NS or Estimate < 0.5
KNOP1	lobule vs duct	-0.0349411	0.886179	0.993644	NS or Estimate < 0.5
C9orf152	lobule vs duct	0.0785349	0.835134	0.987966	NS or Estimate < 0.5
RPS9	lobule vs duct	-0.273878	0.0085603	0.615746	NS or Estimate < 0.5
CXorf66	lobule vs duct	0.360535	0.325916	0.91821	NS or Estimate < 0.5
MPST	lobule vs duct	-0.236605	0.425487	0.943641	NS or Estimate < 0.5
SEH1L	lobule vs duct	0.267572	0.444827	0.947401	NS or Estimate < 0.5
LURAP1	lobule vs duct	-0.0715178	0.842043	0.988571	NS or Estimate < 0.5
ZC2HC1B	lobule vs duct	-0.258851	0.427155	0.943641	NS or Estimate < 0.5
CFAP126	lobule vs duct	0.137196	0.631029	0.976256	NS or Estimate < 0.5
CCDC184	lobule vs duct	0.188572	0.40262	0.939436	NS or Estimate < 0.5
PRR25	lobule vs duct	0.0479656	0.880071	0.993234	NS or Estimate < 0.5
PRR23B	lobule vs duct	0.217855	0.449964	0.948314	NS or Estimate < 0.5
ZNF793	lobule vs duct	-0.33498	0.148588	0.86699	NS or Estimate < 0.5
VSIG8	lobule vs duct	-0.0382107	0.889414	0.99418	NS or Estimate < 0.5
PTRHD1	lobule vs duct	0.497116	0.0440338	0.77139	NS or Estimate < 0.5
C17orf97	lobule vs duct	-0.159309	0.67204	0.977509	NS or Estimate < 0.5
FIGNL2	lobule vs duct	-0.152442	0.632111	0.976256	NS or Estimate < 0.5
EIF2AK4	lobule vs duct	-0.348347	0.259157	0.904302	NS or Estimate < 0.5
PLIN5	lobule vs duct	0.317757	0.302349	0.915639	NS or Estimate < 0.5
PTCHD4	lobule vs duct	0.221509	0.522365	0.961095	NS or Estimate < 0.5
RFPL4B	lobule vs duct	-0.638053	0.0239276	0.722021	P < 0.05
MAD1L1	lobule vs duct	0.179762	0.619498	0.976256	NS or Estimate < 0.5
STAP2	lobule vs duct	-0.132109	0.656026	0.976256	NS or Estimate < 0.5
SLTM	lobule vs duct	-0.220511	0.518436	0.961095	NS or Estimate < 0.5
EXOC6	lobule vs duct	0.111536	0.749777	0.986115	NS or Estimate < 0.5
RPS10	lobule vs duct	-0.183221	0.115409	0.854338	NS or Estimate < 0.5
ANXA2R	lobule vs duct	-0.0674283	0.83462	0.987966	NS or Estimate < 0.5
DCUN1D2	lobule vs duct	0.195098	0.577142	0.96942	NS or Estimate < 0.5
FLG2	lobule vs duct	-0.358569	0.309514	0.916726	NS or Estimate < 0.5
AKT1	lobule vs duct	0.527204	0.0618557	0.796953	NS or Estimate < 0.5
CUTA	lobule vs duct	-0.144041	0.633158	0.976256	NS or Estimate < 0.5
ODF3B	lobule vs duct	0.0270666	0.93705	0.996635	NS or Estimate < 0.5
DDX19B	lobule vs duct	0.258239	0.384283	0.931747	NS or Estimate < 0.5
ETFB	lobule vs duct	-0.102987	0.772306	0.986115	NS or Estimate < 0.5
FBXO44	lobule vs duct	0.472126	0.144161	0.866148	NS or Estimate < 0.5
KCNMA1	lobule vs duct	0.310872	0.318442	0.916726	NS or Estimate < 0.5
ME3	lobule vs duct	0.285427	0.37775	0.931084	NS or Estimate < 0.5
TM9SF1	lobule vs duct	0.10317	0.795509	0.987069	NS or Estimate < 0.5
CFH	lobule vs duct	-0.297128	0.351154	0.926354	NS or Estimate < 0.5
LAT	lobule vs duct	0.131786	0.698646	0.980874	NS or Estimate < 0.5
CKMT1A	lobule vs duct	0.00845596	0.980526	0.999774	NS or Estimate < 0.5
LLGL2	lobule vs duct	0.915378	0.0165847	0.674985	P < 0.05
ALG1L	lobule vs duct	0.0686696	0.844497	0.988755	NS or Estimate < 0.5
MPG	lobule vs duct	0.0407098	0.874273	0.992144	NS or Estimate < 0.5
RTKN	lobule vs duct	0.210135	0.511855	0.958145	NS or Estimate < 0.5
DNAJC25	lobule vs duct	0.356142	0.224458	0.897302	NS or Estimate < 0.5
RPS12	lobule vs duct	0.0338357	0.794117	0.986989	NS or Estimate < 0.5
RPS13	lobule vs duct	-0.0513388	0.730909	0.984474	NS or Estimate < 0.5
KHDC3L	lobule vs duct	0.00977887	0.975858	0.999465	NS or Estimate < 0.5
MSMO1	lobule vs duct	0.547155	0.0895458	0.835544	NS or Estimate < 0.5
SUGP2	lobule vs duct	0.0811293	0.677935	0.977911	NS or Estimate < 0.5
TRIM36	lobule vs duct	0.0184093	0.942758	0.996715	NS or Estimate < 0.5
MAEA	lobule vs duct	-0.0266017	0.930283	0.994961	NS or Estimate < 0.5
S100PBP	lobule vs duct	-0.193023	0.534393	0.96181	NS or Estimate < 0.5
GOPC	lobule vs duct	-0.642041	0.045224	0.77139	P < 0.05
ALDH18A1	lobule vs duct	0.216304	0.484988	0.953765	NS or Estimate < 0.5
BTBD11	lobule vs duct	0.0995127	0.708518	0.982545	NS or Estimate < 0.5
ARHGAP8	lobule vs duct	0.22351	0.484154	0.953453	NS or Estimate < 0.5
RCCD1	lobule vs duct	-0.148977	0.613859	0.976256	NS or Estimate < 0.5
DAPL1	lobule vs duct	0.295	0.352086	0.926354	NS or Estimate < 0.5
VMAC	lobule vs duct	0.627509	0.0337151	0.746354	P < 0.05
ERMAP	lobule vs duct	0.105002	0.794396	0.986989	NS or Estimate < 0.5
C14orf28	lobule vs duct	-0.12485	0.66968	0.976256	NS or Estimate < 0.5
OS9	lobule vs duct	-0.11163	0.611949	0.975838	NS or Estimate < 0.5
HSP90AA1	lobule vs duct	0.21288	0.162469	0.86699	NS or Estimate < 0.5
KIAA2026	lobule vs duct	0.530308	0.169395	0.86699	NS or Estimate < 0.5
TMEM30B	lobule vs duct	-0.198798	0.522869	0.961095	NS or Estimate < 0.5
ATP6AP1L	lobule vs duct	-0.1313	0.727725	0.984474	NS or Estimate < 0.5
RAB28	lobule vs duct	-0.205142	0.51585	0.96009	NS or Estimate < 0.5
RNF215	lobule vs duct	-0.490743	0.129433	0.858492	NS or Estimate < 0.5
SH3PXD2B	lobule vs duct	-0.613187	0.076649	0.815403	NS or Estimate < 0.5
GNG10	lobule vs duct	-0.00337106	0.988578	0.999774	NS or Estimate < 0.5
RPS15	lobule vs duct	-0.077062	0.46607	0.950909	NS or Estimate < 0.5
SORBS3	lobule vs duct	0.0940206	0.717726	0.983029	NS or Estimate < 0.5
SH3BP5	lobule vs duct	-0.209014	0.476184	0.951304	NS or Estimate < 0.5
MUC1	lobule vs duct	0.5107	0.17695	0.867434	NS or Estimate < 0.5
MTCP1	lobule vs duct	0.330376	0.278105	0.910243	NS or Estimate < 0.5
EPM2A	lobule vs duct	0.295102	0.364265	0.928448	NS or Estimate < 0.5
DKK3	lobule vs duct	0.518995	0.0554115	0.778973	NS or Estimate < 0.5
SERBP1	lobule vs duct	0.266396	0.199351	0.876417	NS or Estimate < 0.5
NR3C1	lobule vs duct	0.343112	0.29323	0.913334	NS or Estimate < 0.5
FPGS	lobule vs duct	-0.398979	0.15845	0.86699	NS or Estimate < 0.5
SLC26A10	lobule vs duct	0.216696	0.438725	0.945288	NS or Estimate < 0.5
VPS13C	lobule vs duct	0.00414184	0.9865	0.999774	NS or Estimate < 0.5
ICE2	lobule vs duct	0.683101	0.0226108	0.715791	P < 0.05
CAVIN4	lobule vs duct	0.37527	0.20972	0.889616	NS or Estimate < 0.5
RPS16	lobule vs duct	0.210182	0.12297	0.857185	NS or Estimate < 0.5
PUM1	lobule vs duct	0.393484	0.142676	0.866148	NS or Estimate < 0.5
MYADM	lobule vs duct	0.195293	0.514388	0.95963	NS or Estimate < 0.5
RPS17	lobule vs duct	-0.0313558	0.748298	0.986115	NS or Estimate < 0.5
RPS19	lobule vs duct	-0.182183	0.19218	0.876139	NS or Estimate < 0.5
ZNF749	lobule vs duct	-0.108374	0.726836	0.984474	NS or Estimate < 0.5
GOLGA8A	lobule vs duct	0.279329	0.1825	0.870539	NS or Estimate < 0.5
IQCB1	lobule vs duct	-0.0576161	0.84462	0.988755	NS or Estimate < 0.5
RPS21	lobule vs duct	-0.215413	0.215417	0.89205	NS or Estimate < 0.5
S100A13	lobule vs duct	0.187103	0.66201	0.976256	NS or Estimate < 0.5
FBLIM1	lobule vs duct	-0.0108554	0.97377	0.999465	NS or Estimate < 0.5
ARF1	lobule vs duct	-0.0358049	0.880374	0.993234	NS or Estimate < 0.5
TM2D2	lobule vs duct	-0.289366	0.361626	0.928448	NS or Estimate < 0.5
RTL5	lobule vs duct	0.687219	0.040555	0.761804	P < 0.05
MSS51	lobule vs duct	0.140513	0.710042	0.982545	NS or Estimate < 0.5
LRRC24	lobule vs duct	-0.0185332	0.958287	0.997611	NS or Estimate < 0.5
FBXO48	lobule vs duct	-0.36396	0.255607	0.902597	NS or Estimate < 0.5
ZNF688	lobule vs duct	0.194268	0.542906	0.962957	NS or Estimate < 0.5
CD276	lobule vs duct	-0.519744	0.0124517	0.626509	P < 0.05
SLC6A9	lobule vs duct	0.817305	0.00815041	0.615746	P < 0.05
TGFBR2	lobule vs duct	0.200976	0.512952	0.958393	NS or Estimate < 0.5
EXOC1	lobule vs duct	0.141644	0.642663	0.976256	NS or Estimate < 0.5
MINK1	lobule vs duct	0.44429	0.147612	0.86699	NS or Estimate < 0.5
TRIM17	lobule vs duct	-0.263561	0.3186	0.916726	NS or Estimate < 0.5
YIPF5	lobule vs duct	0.0206552	0.946119	0.996715	NS or Estimate < 0.5
FNBP1L	lobule vs duct	0.21594	0.278413	0.910243	NS or Estimate < 0.5
SC5D	lobule vs duct	0.337184	0.30934	0.916726	NS or Estimate < 0.5
RPS14	lobule vs duct	-0.0857513	0.406267	0.940111	NS or Estimate < 0.5
AFF3	lobule vs duct	0.465347	0.165543	0.86699	NS or Estimate < 0.5
CD34	lobule vs duct	0.0298735	0.936974	0.996635	NS or Estimate < 0.5
CHN1	lobule vs duct	0.00971544	0.979338	0.999682	NS or Estimate < 0.5
U2AF1	lobule vs duct	-0.168051	0.67889	0.977911	NS or Estimate < 0.5
DUT	lobule vs duct	-0.191542	0.592498	0.972786	NS or Estimate < 0.5
CXorf65	lobule vs duct	0.280035	0.446154	0.947586	NS or Estimate < 0.5
DPPA5	lobule vs duct	-0.133815	0.651053	0.976256	NS or Estimate < 0.5
RAB12	lobule vs duct	0.191184	0.40125	0.939436	NS or Estimate < 0.5
AARD	lobule vs duct	0.221061	0.562202	0.963909	NS or Estimate < 0.5
VEGFA	lobule vs duct	0.340635	0.250941	0.90203	NS or Estimate < 0.5
SPAG16	lobule vs duct	0.178283	0.448393	0.94784	NS or Estimate < 0.5
RPS24	lobule vs duct	-0.308791	0.0392538	0.75973	NS or Estimate < 0.5
RPS25	lobule vs duct	-0.0177224	0.907567	0.994961	NS or Estimate < 0.5
RPS26	lobule vs duct	-0.353694	0.168798	0.86699	NS or Estimate < 0.5
CCM2	lobule vs duct	0.225918	0.415923	0.941883	NS or Estimate < 0.5
TCAIM	lobule vs duct	0.0147091	0.963079	0.997692	NS or Estimate < 0.5
KCTD21	lobule vs duct	-0.245922	0.484272	0.953504	NS or Estimate < 0.5
KIAA1755	lobule vs duct	0.0625526	0.850958	0.991095	NS or Estimate < 0.5
RGS7BP	lobule vs duct	0.820122	0.0136042	0.648354	P < 0.05
SFMBT2	lobule vs duct	-0.144663	0.684413	0.978588	NS or Estimate < 0.5
CPTP	lobule vs duct	0.230794	0.423832	0.943641	NS or Estimate < 0.5
ZNF16	lobule vs duct	0.0162537	0.966976	0.998138	NS or Estimate < 0.5
METTL17	lobule vs duct	0.197686	0.434817	0.944694	NS or Estimate < 0.5
RPS27	lobule vs duct	-0.282653	0.0137645	0.648354	NS or Estimate < 0.5
AP2B1	lobule vs duct	-0.286338	0.423152	0.943641	NS or Estimate < 0.5
AP1G1	lobule vs duct	0.133763	0.6444	0.976256	NS or Estimate < 0.5
ARHGAP5	lobule vs duct	0.574001	0.0330127	0.746354	P < 0.05
PLPP4	lobule vs duct	0.230736	0.368451	0.928448	NS or Estimate < 0.5
SAMD5	lobule vs duct	-0.0468425	0.883206	0.993234	NS or Estimate < 0.5
RPS28	lobule vs duct	-0.357281	0.00417551	0.544945	NS or Estimate < 0.5
SPDYE2	lobule vs duct	-0.428157	0.228849	0.897302	NS or Estimate < 0.5
ZNF816	lobule vs duct	-0.0869964	0.764038	0.986115	NS or Estimate < 0.5
CYB5RL	lobule vs duct	0.188885	0.59544	0.973137	NS or Estimate < 0.5
IFIT3	lobule vs duct	0.14062	0.656071	0.976256	NS or Estimate < 0.5
SRSF7	lobule vs duct	0.570847	0.121837	0.857185	NS or Estimate < 0.5
TP53BP2	lobule vs duct	0.770461	0.00911867	0.621525	P < 0.05
PLAA	lobule vs duct	0.3764	0.280952	0.910698	NS or Estimate < 0.5
SCMH1	lobule vs duct	-0.312018	0.398987	0.939013	NS or Estimate < 0.5
PLD3	lobule vs duct	-0.450611	0.213513	0.892037	NS or Estimate < 0.5
GASK1B	lobule vs duct	0.194846	0.501877	0.954999	NS or Estimate < 0.5
CT55	lobule vs duct	0.0280181	0.935462	0.996171	NS or Estimate < 0.5
RNLS	lobule vs duct	-0.452213	0.197039	0.876417	NS or Estimate < 0.5
ERGIC1	lobule vs duct	-0.229533	0.476383	0.951304	NS or Estimate < 0.5
TRMT11	lobule vs duct	-0.648689	0.0385717	0.75973	P < 0.05
MCUR1	lobule vs duct	0.537391	0.0886269	0.835544	NS or Estimate < 0.5
DHRS12	lobule vs duct	0.00129961	0.996266	0.99991	NS or Estimate < 0.5
DNAJB14	lobule vs duct	0.254459	0.43699	0.944861	NS or Estimate < 0.5
DDX59	lobule vs duct	-0.0132795	0.967424	0.998138	NS or Estimate < 0.5
CFAP206	lobule vs duct	0.433716	0.268655	0.906999	NS or Estimate < 0.5
ALDH3A2	lobule vs duct	-0.185661	0.610038	0.975348	NS or Estimate < 0.5
CSNK1G3	lobule vs duct	-0.246472	0.399984	0.939013	NS or Estimate < 0.5
RPS29	lobule vs duct	-0.0504283	0.640923	0.976256	NS or Estimate < 0.5
RCE1	lobule vs duct	-0.460515	0.195361	0.876417	NS or Estimate < 0.5
TMPO	lobule vs duct	0.247433	0.368176	0.928448	NS or Estimate < 0.5
PSRC1	lobule vs duct	-0.104486	0.748549	0.986115	NS or Estimate < 0.5
STK24	lobule vs duct	0.0721424	0.778446	0.986115	NS or Estimate < 0.5
SPINT1	lobule vs duct	0.125007	0.656197	0.976256	NS or Estimate < 0.5
LCMT1	lobule vs duct	0.0139518	0.965111	0.997946	NS or Estimate < 0.5
HNRNPH2	lobule vs duct	-0.196637	0.539667	0.96181	NS or Estimate < 0.5
OAS1	lobule vs duct	-0.480417	0.178047	0.869022	NS or Estimate < 0.5
USP16	lobule vs duct	-0.0586267	0.831546	0.987966	NS or Estimate < 0.5
RRM1	lobule vs duct	-0.535243	0.12363	0.857685	NS or Estimate < 0.5
FBXO7	lobule vs duct	0.356972	0.267875	0.906983	NS or Estimate < 0.5
EXTL2	lobule vs duct	-0.0189155	0.964217	0.997946	NS or Estimate < 0.5
GLUL	lobule vs duct	0.319192	0.192115	0.876139	NS or Estimate < 0.5
NGRN	lobule vs duct	0.0473935	0.863912	0.992144	NS or Estimate < 0.5
SRGAP3	lobule vs duct	-0.202098	0.540296	0.96181	NS or Estimate < 0.5
SAR1B	lobule vs duct	-0.338666	0.315536	0.916726	NS or Estimate < 0.5
TMEM98	lobule vs duct	0.0786053	0.811122	0.987966	NS or Estimate < 0.5
CSTF3	lobule vs duct	0.0671532	0.779825	0.986201	NS or Estimate < 0.5
CSTF1	lobule vs duct	-0.318344	0.308283	0.916726	NS or Estimate < 0.5
PPM1B	lobule vs duct	0.16365	0.668573	0.976256	NS or Estimate < 0.5
DNAAF4	lobule vs duct	0.482463	0.166136	0.86699	NS or Estimate < 0.5
PHF12	lobule vs duct	0.128801	0.669868	0.976256	NS or Estimate < 0.5
AMZ2	lobule vs duct	0.106193	0.693394	0.979931	NS or Estimate < 0.5
RARA	lobule vs duct	0.407698	0.168514	0.86699	NS or Estimate < 0.5
TRPT1	lobule vs duct	-0.0348712	0.921157	0.994961	NS or Estimate < 0.5
ZNF404	lobule vs duct	-0.111101	0.768429	0.986115	NS or Estimate < 0.5
DCLRE1C	lobule vs duct	-0.566242	0.0480506	0.77139	P < 0.05
TRAF5	lobule vs duct	0.164035	0.672905	0.977911	NS or Estimate < 0.5
DMAP1	lobule vs duct	-0.246636	0.47285	0.951304	NS or Estimate < 0.5
ERP29	lobule vs duct	-0.169864	0.559708	0.963227	NS or Estimate < 0.5
EXOSC9	lobule vs duct	0.106569	0.71179	0.982545	NS or Estimate < 0.5
NHP2	lobule vs duct	0.00794728	0.966902	0.998138	NS or Estimate < 0.5
KCNIP1	lobule vs duct	-0.0752152	0.814176	0.987966	NS or Estimate < 0.5
ITPRIPL2	lobule vs duct	-0.185933	0.563295	0.964317	NS or Estimate < 0.5
KCNIP3	lobule vs duct	-0.366564	0.266226	0.906983	NS or Estimate < 0.5
SORBS1	lobule vs duct	0.390457	0.167484	0.86699	NS or Estimate < 0.5
C18orf32	lobule vs duct	-0.362067	0.190835	0.876139	NS or Estimate < 0.5
RGL3	lobule vs duct	-0.0750768	0.802468	0.987966	NS or Estimate < 0.5
UFD1	lobule vs duct	-0.413002	0.221423	0.897302	NS or Estimate < 0.5
FAM102A	lobule vs duct	0.3771	0.182299	0.870539	NS or Estimate < 0.5
RPL38	lobule vs duct	-0.234154	0.11451	0.854338	NS or Estimate < 0.5
RYR3	lobule vs duct	0.00217871	0.994972	0.99991	NS or Estimate < 0.5
EXOC4	lobule vs duct	0.146503	0.637464	0.976256	NS or Estimate < 0.5
CYS1	lobule vs duct	0.311872	0.404069	0.939436	NS or Estimate < 0.5
FAM220A	lobule vs duct	0.515769	0.117348	0.854338	NS or Estimate < 0.5
ARL4A	lobule vs duct	0.0919465	0.707313	0.982545	NS or Estimate < 0.5
FOXK1	lobule vs duct	-0.471731	0.209677	0.889616	NS or Estimate < 0.5
ARL5A	lobule vs duct	-0.308042	0.258918	0.904302	NS or Estimate < 0.5
ZNF829	lobule vs duct	-0.076472	0.847098	0.989692	NS or Estimate < 0.5
GGPS1	lobule vs duct	-0.0103936	0.971364	0.998986	NS or Estimate < 0.5
EIF3B	lobule vs duct	-0.0221261	0.941792	0.996677	NS or Estimate < 0.5
CMTM5	lobule vs duct	0.554459	0.110856	0.854338	NS or Estimate < 0.5
TRIM16L	lobule vs duct	0.244858	0.457664	0.949883	NS or Estimate < 0.5
PDE4B	lobule vs duct	0.361458	0.21469	0.892037	NS or Estimate < 0.5
CDKL5	lobule vs duct	0.027095	0.941942	0.996677	NS or Estimate < 0.5
AGPAT3	lobule vs duct	-0.0681502	0.800082	0.987966	NS or Estimate < 0.5
SIL1	lobule vs duct	0.0635803	0.86252	0.992144	NS or Estimate < 0.5
BTF3	lobule vs duct	-0.0761398	0.687988	0.978588	NS or Estimate < 0.5
PARL	lobule vs duct	0.113315	0.737298	0.985211	NS or Estimate < 0.5
EEF1B2	lobule vs duct	0.0713951	0.61358	0.976256	NS or Estimate < 0.5
DEFB116	lobule vs duct	0.286092	0.38923	0.934624	NS or Estimate < 0.5
DEFB128	lobule vs duct	-0.469768	0.185426	0.873665	NS or Estimate < 0.5
ZNF284	lobule vs duct	0.0477777	0.882321	0.993234	NS or Estimate < 0.5
SLC38A10	lobule vs duct	0.269281	0.502126	0.954999	NS or Estimate < 0.5
SCNN1A	lobule vs duct	0.00695913	0.986199	0.999774	NS or Estimate < 0.5
MARVELD2	lobule vs duct	0.439353	0.193992	0.876417	NS or Estimate < 0.5
GOLGA6A	lobule vs duct	-0.0540145	0.774732	0.986115	NS or Estimate < 0.5
CDC42SE2	lobule vs duct	-0.0850528	0.827826	0.987966	NS or Estimate < 0.5
CDC42SE1	lobule vs duct	-0.038045	0.9122	0.994961	NS or Estimate < 0.5
PRPS2	lobule vs duct	0.346227	0.274456	0.907759	NS or Estimate < 0.5
ZNF718	lobule vs duct	-0.0898639	0.804001	0.987966	NS or Estimate < 0.5
RGS21	lobule vs duct	0.0274387	0.938431	0.996635	NS or Estimate < 0.5
MRGPRE	lobule vs duct	-0.138455	0.667913	0.976256	NS or Estimate < 0.5
BOLA2B	lobule vs duct	-0.0463285	0.893367	0.994961	NS or Estimate < 0.5
ALG13	lobule vs duct	-0.407859	0.22769	0.897302	NS or Estimate < 0.5
ATAD3C	lobule vs duct	0.00732706	0.984416	0.999774	NS or Estimate < 0.5
CEACAM16	lobule vs duct	-0.817546	0.0163717	0.674985	P < 0.05
SLC25A29	lobule vs duct	0.314755	0.216658	0.893342	NS or Estimate < 0.5
ZBTB7C	lobule vs duct	0.602724	0.0561736	0.778973	NS or Estimate < 0.5
ATP6V1E1	lobule vs duct	0.0353902	0.901649	0.994961	NS or Estimate < 0.5
SPATA6L	lobule vs duct	0.21387	0.33781	0.921005	NS or Estimate < 0.5
SRSF5	lobule vs duct	-0.103503	0.43537	0.944861	NS or Estimate < 0.5
THEMIS2	lobule vs duct	0.102279	0.783594	0.986712	NS or Estimate < 0.5
AREL1	lobule vs duct	-0.0988251	0.629561	0.976256	NS or Estimate < 0.5
ETNK1	lobule vs duct	-0.209848	0.555273	0.963227	NS or Estimate < 0.5
FHL2	lobule vs duct	0.141387	0.696442	0.98069	NS or Estimate < 0.5
PRSS53	lobule vs duct	-0.642963	0.125089	0.858492	NS or Estimate < 0.5
GK5	lobule vs duct	0.17197	0.646325	0.976256	NS or Estimate < 0.5
SEC14L1	lobule vs duct	-0.369176	0.310856	0.916726	NS or Estimate < 0.5
CCNL2	lobule vs duct	0.51334	0.0347381	0.751537	P < 0.05
MAP9	lobule vs duct	-0.0578582	0.854002	0.991095	NS or Estimate < 0.5
USP9X	lobule vs duct	0.254102	0.339065	0.921704	NS or Estimate < 0.5
SPAG8	lobule vs duct	-0.441309	0.183636	0.87108	NS or Estimate < 0.5
IAH1	lobule vs duct	0.494148	0.158486	0.86699	NS or Estimate < 0.5
ZMYM5	lobule vs duct	0.230356	0.479196	0.951904	NS or Estimate < 0.5
SAPCD1	lobule vs duct	0.398516	0.227685	0.897302	NS or Estimate < 0.5
IL18BP	lobule vs duct	0.0740986	0.835887	0.987966	NS or Estimate < 0.5
TYW5	lobule vs duct	0.00493535	0.987852	0.999774	NS or Estimate < 0.5
SNAPC3	lobule vs duct	-0.501497	0.0625211	0.796953	NS or Estimate < 0.5
ENTR1	lobule vs duct	0.152768	0.652136	0.976256	NS or Estimate < 0.5
DEDD	lobule vs duct	-0.282881	0.302058	0.915639	NS or Estimate < 0.5
ABHD18	lobule vs duct	0.462349	0.161855	0.86699	NS or Estimate < 0.5
CCNI2	lobule vs duct	-0.380986	0.261204	0.905486	NS or Estimate < 0.5
CDC42	lobule vs duct	-0.154487	0.535417	0.96181	NS or Estimate < 0.5
CHIC1	lobule vs duct	-0.893824	0.00724379	0.608835	P < 0.05
IZUMO4	lobule vs duct	-0.234695	0.441812	0.947091	NS or Estimate < 0.5
GPX4	lobule vs duct	0.232692	0.298408	0.914337	NS or Estimate < 0.5
STRN4	lobule vs duct	0.124196	0.761953	0.986115	NS or Estimate < 0.5
FKRP	lobule vs duct	0.21631	0.339169	0.921742	NS or Estimate < 0.5
ZNF384	lobule vs duct	-0.09073	0.775157	0.986115	NS or Estimate < 0.5
MESP2	lobule vs duct	0.456888	0.136903	0.859959	NS or Estimate < 0.5
MEOX1	lobule vs duct	0.0503358	0.867839	0.992144	NS or Estimate < 0.5
TCERG1	lobule vs duct	-0.652133	0.0388981	0.75973	P < 0.05
SWI5	lobule vs duct	-0.216478	0.604357	0.974958	NS or Estimate < 0.5
FAM3C	lobule vs duct	0.308637	0.139741	0.863244	NS or Estimate < 0.5
ARL16	lobule vs duct	-0.116073	0.688565	0.978627	NS or Estimate < 0.5
C8orf74	lobule vs duct	0.0881152	0.646511	0.976256	NS or Estimate < 0.5
MAPK3	lobule vs duct	-0.0987174	0.753965	0.986115	NS or Estimate < 0.5
FAM133B	lobule vs duct	0.249285	0.393195	0.936265	NS or Estimate < 0.5
MUC17	lobule vs duct	-0.157977	0.649068	0.976256	NS or Estimate < 0.5
NRF1	lobule vs duct	-0.309066	0.371438	0.928448	NS or Estimate < 0.5
MYH11	lobule vs duct	0.324205	0.360454	0.928448	NS or Estimate < 0.5
ARAP1	lobule vs duct	-0.413759	0.173743	0.86699	NS or Estimate < 0.5
PALM	lobule vs duct	0.199388	0.551616	0.963227	NS or Estimate < 0.5
ACTR3B	lobule vs duct	0.154223	0.565242	0.964372	NS or Estimate < 0.5
CHTF8	lobule vs duct	0.0396936	0.901235	0.994961	NS or Estimate < 0.5
SERPINB7	lobule vs duct	0.28292	0.429614	0.943641	NS or Estimate < 0.5
PEG10	lobule vs duct	0.890229	0.00889621	0.617325	P < 0.05
HTR4	lobule vs duct	0.356047	0.335919	0.921005	NS or Estimate < 0.5
AKR1E2	lobule vs duct	-0.244697	0.13943	0.863244	NS or Estimate < 0.5
CLDND1	lobule vs duct	-0.00903919	0.972835	0.99918	NS or Estimate < 0.5
ZNF765	lobule vs duct	0.070069	0.818872	0.987966	NS or Estimate < 0.5
TYSND1	lobule vs duct	-0.122074	0.648129	0.976256	NS or Estimate < 0.5
PRDM15	lobule vs duct	-0.0165271	0.956275	0.997611	NS or Estimate < 0.5
U2AF1L4	lobule vs duct	0.235042	0.477896	0.951304	NS or Estimate < 0.5
COA3	lobule vs duct	0.212238	0.413885	0.941085	NS or Estimate < 0.5
YARS2	lobule vs duct	-0.407218	0.232482	0.897568	NS or Estimate < 0.5
MAPK8IP3	lobule vs duct	0.278984	0.340583	0.922551	NS or Estimate < 0.5
ZBTB8A	lobule vs duct	-0.160763	0.596863	0.973137	NS or Estimate < 0.5
PHF11	lobule vs duct	0.0281314	0.932407	0.995822	NS or Estimate < 0.5
ASB1	lobule vs duct	-0.600896	0.117735	0.854338	NS or Estimate < 0.5
RUFY1	lobule vs duct	0.261196	0.31198	0.916726	NS or Estimate < 0.5
SLC26A6	lobule vs duct	-0.0116515	0.966491	0.998109	NS or Estimate < 0.5
SIDT2	lobule vs duct	0.621513	0.0178344	0.68447	P < 0.05
RHBDD2	lobule vs duct	0.577104	0.0311036	0.743721	P < 0.05
ERAP1	lobule vs duct	0.381214	0.21698	0.893342	NS or Estimate < 0.5
NCALD	lobule vs duct	0.275883	0.403595	0.939436	NS or Estimate < 0.5
CRCP	lobule vs duct	-0.27608	0.4436	0.947109	NS or Estimate < 0.5
ACP1	lobule vs duct	-0.0181229	0.943292	0.996715	NS or Estimate < 0.5
ZXDC	lobule vs duct	0.502954	0.0785653	0.815643	NS or Estimate < 0.5
TTC23	lobule vs duct	-0.324458	0.381557	0.931646	NS or Estimate < 0.5
GAGE1	lobule vs duct	-0.163662	0.582293	0.969923	NS or Estimate < 0.5
INCENP	lobule vs duct	0.154984	0.650763	0.976256	NS or Estimate < 0.5
UEVLD	lobule vs duct	-0.450085	0.192888	0.876262	NS or Estimate < 0.5
KIAA0895L	lobule vs duct	0.492847	0.0650213	0.796953	NS or Estimate < 0.5
GDAP1	lobule vs duct	-0.215294	0.599922	0.973641	NS or Estimate < 0.5
ABCE1	lobule vs duct	-0.072313	0.837677	0.988542	NS or Estimate < 0.5
RALGDS	lobule vs duct	0.443228	0.146964	0.86699	NS or Estimate < 0.5
RO60	lobule vs duct	0.247935	0.478464	0.951527	NS or Estimate < 0.5
PREPL	lobule vs duct	0.0599051	0.816735	0.987966	NS or Estimate < 0.5
PPP4R1	lobule vs duct	0.268662	0.461932	0.949883	NS or Estimate < 0.5
ANKZF1	lobule vs duct	0.0264455	0.914655	0.994961	NS or Estimate < 0.5
CYLD	lobule vs duct	0.19126	0.499443	0.954999	NS or Estimate < 0.5
ZNF596	lobule vs duct	0.718322	0.0111902	0.626509	P < 0.05
RUFY2	lobule vs duct	-0.085554	0.795173	0.987069	NS or Estimate < 0.5
CAST	lobule vs duct	-0.0485234	0.889232	0.99418	NS or Estimate < 0.5
TGFB1I1	lobule vs duct	-0.15815	0.629707	0.976256	NS or Estimate < 0.5
TMEM80	lobule vs duct	0.12907	0.666987	0.976256	NS or Estimate < 0.5
SUMF2	lobule vs duct	-0.0374267	0.884294	0.993295	NS or Estimate < 0.5
GSDMB	lobule vs duct	0.129298	0.706211	0.982545	NS or Estimate < 0.5
ACBD5	lobule vs duct	0.367928	0.259227	0.904302	NS or Estimate < 0.5
DEFA1B	lobule vs duct	0.118954	0.732677	0.984474	NS or Estimate < 0.5
LGALS7B	lobule vs duct	-0.449724	0.21252	0.891575	NS or Estimate < 0.5
C2orf88	lobule vs duct	-0.382935	0.208006	0.889106	NS or Estimate < 0.5
RIOX2	lobule vs duct	0.348584	0.292416	0.913334	NS or Estimate < 0.5
NCBP2	lobule vs duct	0.0781908	0.733335	0.984474	NS or Estimate < 0.5
EIF4G2	lobule vs duct	0.246351	0.16168	0.86699	NS or Estimate < 0.5
CHD2	lobule vs duct	-0.404781	0.187633	0.873665	NS or Estimate < 0.5
SNUPN	lobule vs duct	-0.201635	0.546608	0.963227	NS or Estimate < 0.5
ERBB4	lobule vs duct	-0.215475	0.496333	0.954392	NS or Estimate < 0.5
SNX21	lobule vs duct	0.40474	0.127121	0.858492	NS or Estimate < 0.5
NGDN	lobule vs duct	-0.282594	0.35187	0.926354	NS or Estimate < 0.5
SHPRH	lobule vs duct	0.390503	0.274085	0.907759	NS or Estimate < 0.5
IQCJ	lobule vs duct	-0.306546	0.312669	0.916726	NS or Estimate < 0.5
GTPBP10	lobule vs duct	0.236548	0.469646	0.950909	NS or Estimate < 0.5
NECTIN2	lobule vs duct	0.437657	0.10195	0.850547	NS or Estimate < 0.5
SEC24B	lobule vs duct	-0.148104	0.573538	0.96731	NS or Estimate < 0.5
STAG2	lobule vs duct	0.361942	0.313948	0.916726	NS or Estimate < 0.5
CSKMT	lobule vs duct	-0.452774	0.109669	0.854338	NS or Estimate < 0.5
ELMSAN1	lobule vs duct	0.207522	0.428171	0.943641	NS or Estimate < 0.5
TPM3	lobule vs duct	-0.16073	0.418105	0.942895	NS or Estimate < 0.5
SLC6A3	lobule vs duct	-0.355386	0.260506	0.904569	NS or Estimate < 0.5
NUTM2G	lobule vs duct	0.0383788	0.890144	0.99418	NS or Estimate < 0.5
SLC12A2	lobule vs duct	0.472216	0.175938	0.86699	NS or Estimate < 0.5
SRD5A1	lobule vs duct	-0.0484696	0.889831	0.99418	NS or Estimate < 0.5
DPH3	lobule vs duct	-0.0577727	0.876797	0.992144	NS or Estimate < 0.5
SST	lobule vs duct	-0.368857	0.25027	0.90203	NS or Estimate < 0.5
PHACTR4	lobule vs duct	0.485552	0.0914102	0.835902	NS or Estimate < 0.5
CLCC1	lobule vs duct	-0.173987	0.599207	0.973641	NS or Estimate < 0.5
DBNDD2	lobule vs duct	0.294529	0.352946	0.926354	NS or Estimate < 0.5
UBL5	lobule vs duct	0.039633	0.872316	0.992144	NS or Estimate < 0.5
SMIM15	lobule vs duct	-0.371793	0.212202	0.891264	NS or Estimate < 0.5
SSTR4	lobule vs duct	-0.109888	0.581993	0.969923	NS or Estimate < 0.5
SULT1A2	lobule vs duct	-0.349417	0.291941	0.913334	NS or Estimate < 0.5
TBXAS1	lobule vs duct	0.479758	0.130602	0.858492	NS or Estimate < 0.5
TKT	lobule vs duct	-0.187285	0.517807	0.961095	NS or Estimate < 0.5
TNFRSF1A	lobule vs duct	-0.079917	0.815003	0.987966	NS or Estimate < 0.5
TNFRSF1B	lobule vs duct	0.267918	0.400162	0.939136	NS or Estimate < 0.5
TOP2B	lobule vs duct	0.325072	0.182485	0.870539	NS or Estimate < 0.5
TUBB2A	lobule vs duct	0.0136876	0.958385	0.997611	NS or Estimate < 0.5
TUBG1	lobule vs duct	-0.523326	0.0813823	0.82067	NS or Estimate < 0.5
MZT1	lobule vs duct	-0.00846543	0.978621	0.999546	NS or Estimate < 0.5
UGT2B11	lobule vs duct	-0.0563681	0.87827	0.992465	NS or Estimate < 0.5
MOCS1	lobule vs duct	-0.0989987	0.727501	0.984474	NS or Estimate < 0.5
UGT2B15	lobule vs duct	-0.163327	0.598558	0.97334	NS or Estimate < 0.5
LYRM9	lobule vs duct	0.148965	0.590022	0.971545	NS or Estimate < 0.5
ZNF391	lobule vs duct	0.273488	0.302947	0.915639	NS or Estimate < 0.5
SLC7A6	lobule vs duct	0.151075	0.547194	0.963227	NS or Estimate < 0.5
QSER1	lobule vs duct	-0.250856	0.336423	0.921005	NS or Estimate < 0.5
METTL9	lobule vs duct	0.795359	0.0332737	0.746354	P < 0.05
CDC14B	lobule vs duct	0.0142099	0.959785	0.997611	NS or Estimate < 0.5
FSCN2	lobule vs duct	0.223751	0.478715	0.951527	NS or Estimate < 0.5
MYH14	lobule vs duct	-0.340317	0.288431	0.913334	NS or Estimate < 0.5
HS6ST2	lobule vs duct	0.171662	0.595738	0.973137	NS or Estimate < 0.5
ZNF436	lobule vs duct	0.103141	0.718887	0.983677	NS or Estimate < 0.5
ATG9A	lobule vs duct	-0.344812	0.28542	0.913334	NS or Estimate < 0.5
SPPL2B	lobule vs duct	-0.408533	0.135376	0.859959	NS or Estimate < 0.5
UBXN11	lobule vs duct	0.210494	0.540467	0.96181	NS or Estimate < 0.5
WIPF1	lobule vs duct	-0.34709	0.195299	0.876417	NS or Estimate < 0.5
ZNF682	lobule vs duct	-0.462356	0.2258	0.897302	NS or Estimate < 0.5
DPH5	lobule vs duct	0.110608	0.749658	0.986115	NS or Estimate < 0.5
TMEM231	lobule vs duct	-0.116317	0.666734	0.976256	NS or Estimate < 0.5
ZNF586	lobule vs duct	0.861202	0.0393188	0.75973	P < 0.05
BCLAF1	lobule vs duct	0.127794	0.578857	0.969893	NS or Estimate < 0.5
TSEN34	lobule vs duct	-0.0489122	0.785687	0.986712	NS or Estimate < 0.5
SLC38A1	lobule vs duct	-0.000296833	0.999184	0.99991	NS or Estimate < 0.5
KLK5	lobule vs duct	0.552443	0.156191	0.86699	NS or Estimate < 0.5
NFKB2	lobule vs duct	0.104055	0.750665	0.986115	NS or Estimate < 0.5
FAM222B	lobule vs duct	-0.375735	0.0732545	0.814374	NS or Estimate < 0.5
SLC39A7	lobule vs duct	0.140249	0.708242	0.982545	NS or Estimate < 0.5
UBXN2B	lobule vs duct	0.341937	0.317235	0.916726	NS or Estimate < 0.5
VPS37D	lobule vs duct	0.349965	0.301382	0.915639	NS or Estimate < 0.5
APH1A	lobule vs duct	0.225433	0.348382	0.92551	NS or Estimate < 0.5
TNFAIP8	lobule vs duct	0.0173389	0.959438	0.997611	NS or Estimate < 0.5
SMCO1	lobule vs duct	0.340765	0.302645	0.915639	NS or Estimate < 0.5
ALG9	lobule vs duct	0.538696	0.135994	0.859959	NS or Estimate < 0.5
MIER1	lobule vs duct	0.52656	0.0519961	0.778973	NS or Estimate < 0.5
RGPD2	lobule vs duct	0.0266437	0.939945	0.996677	NS or Estimate < 0.5
RTL8C	lobule vs duct	0.191563	0.325699	0.91821	NS or Estimate < 0.5
RTL8A	lobule vs duct	0.161288	0.577021	0.969411	NS or Estimate < 0.5
ASAH2B	lobule vs duct	0.449708	0.168681	0.86699	NS or Estimate < 0.5
KTN1	lobule vs duct	0.0326134	0.854236	0.991095	NS or Estimate < 0.5
TRAPPC6B	lobule vs duct	0.163724	0.655648	0.976256	NS or Estimate < 0.5
HNRNPUL2	lobule vs duct	0.706553	0.00738043	0.608835	P < 0.05
TMTC4	lobule vs duct	0.267954	0.213467	0.892037	NS or Estimate < 0.5
FNDC3A	lobule vs duct	-0.00149972	0.993823	0.99991	NS or Estimate < 0.5
KIAA1191	lobule vs duct	0.379962	0.145818	0.86699	NS or Estimate < 0.5
N4BP2L1	lobule vs duct	-0.0686585	0.834138	0.987966	NS or Estimate < 0.5
PGA3	lobule vs duct	-0.851451	0.0110712	0.626509	P < 0.05
XIRP2	lobule vs duct	-0.144892	0.65443	0.976256	NS or Estimate < 0.5
CLRN2	lobule vs duct	0.065255	0.836359	0.987966	NS or Estimate < 0.5
OCIAD1	lobule vs duct	-0.183575	0.512372	0.958145	NS or Estimate < 0.5
CASZ1	lobule vs duct	0.374769	0.261859	0.905486	NS or Estimate < 0.5
DBI	lobule vs duct	0.112937	0.710416	0.982545	NS or Estimate < 0.5
BCS1L	lobule vs duct	-0.00142068	0.996566	0.99991	NS or Estimate < 0.5
CUL4B	lobule vs duct	0.448224	0.111528	0.854338	NS or Estimate < 0.5
VAV3	lobule vs duct	0.0302859	0.893097	0.994914	NS or Estimate < 0.5
RASA4	lobule vs duct	0.0345486	0.901187	0.994961	NS or Estimate < 0.5
PRKD2	lobule vs duct	0.238286	0.49517	0.954392	NS or Estimate < 0.5
OR7E24	lobule vs duct	0.159207	0.667355	0.976256	NS or Estimate < 0.5
LDB3	lobule vs duct	-0.412687	0.180407	0.870539	NS or Estimate < 0.5
CT47A10	lobule vs duct	-0.133808	0.65776	0.976256	NS or Estimate < 0.5
ECPAS	lobule vs duct	-0.484315	0.0507193	0.778973	NS or Estimate < 0.5
PLIN4	lobule vs duct	0.555061	0.0884656	0.835544	NS or Estimate < 0.5
PPM1N	lobule vs duct	0.315678	0.358278	0.927315	NS or Estimate < 0.5
ZNF99	lobule vs duct	0.0251663	0.933351	0.996171	NS or Estimate < 0.5
U2SURP	lobule vs duct	-0.159225	0.634977	0.976256	NS or Estimate < 0.5
DLGAP3	lobule vs duct	0.292379	0.324561	0.917742	NS or Estimate < 0.5
UNK	lobule vs duct	0.22565	0.439899	0.946171	NS or Estimate < 0.5
KDM6B	lobule vs duct	0.0581338	0.855468	0.99113	NS or Estimate < 0.5
SLC45A4	lobule vs duct	-0.484796	0.156765	0.86699	NS or Estimate < 0.5
FTO	lobule vs duct	0.134451	0.578204	0.969816	NS or Estimate < 0.5
LMTK3	lobule vs duct	0.298784	0.304755	0.915952	NS or Estimate < 0.5
IGSF5	lobule vs duct	0.0459981	0.891705	0.994548	NS or Estimate < 0.5
SERPINA11	lobule vs duct	0.127089	0.671411	0.977377	NS or Estimate < 0.5
GPR108	lobule vs duct	-0.0567233	0.859992	0.992144	NS or Estimate < 0.5
INTS1	lobule vs duct	-0.0614975	0.850423	0.991095	NS or Estimate < 0.5
MYO5B	lobule vs duct	-0.0691259	0.794361	0.986989	NS or Estimate < 0.5
FBXO46	lobule vs duct	0.419588	0.21317	0.892037	NS or Estimate < 0.5
PLEKHM3	lobule vs duct	-0.0699116	0.824791	0.987966	NS or Estimate < 0.5
TENM3	lobule vs duct	0.0162166	0.964553	0.997946	NS or Estimate < 0.5
ARHGEF28	lobule vs duct	0.0806473	0.805837	0.987966	NS or Estimate < 0.5
MBOAT1	lobule vs duct	0.0721038	0.814621	0.987966	NS or Estimate < 0.5
AJM1	lobule vs duct	0.0546325	0.864767	0.992144	NS or Estimate < 0.5
PABPN1L	lobule vs duct	-0.101314	0.764609	0.986115	NS or Estimate < 0.5
PRSS54	lobule vs duct	-0.0797168	0.746164	0.986115	NS or Estimate < 0.5
ZNF823	lobule vs duct	0.059647	0.824726	0.987966	NS or Estimate < 0.5
TNRC18	lobule vs duct	0.0686593	0.866607	0.992144	NS or Estimate < 0.5
RGP1	lobule vs duct	0.19165	0.532916	0.96181	NS or Estimate < 0.5
MEGF9	lobule vs duct	-0.180673	0.524087	0.961095	NS or Estimate < 0.5
CCDC159	lobule vs duct	-0.0687665	0.825553	0.987966	NS or Estimate < 0.5
TBX18	lobule vs duct	-0.310665	0.448909	0.94784	NS or Estimate < 0.5
TSPAN11	lobule vs duct	0.218544	0.432708	0.943904	NS or Estimate < 0.5
SETD5	lobule vs duct	-0.10769	0.773978	0.986115	NS or Estimate < 0.5
RASSF10	lobule vs duct	0.15771	0.642932	0.976256	NS or Estimate < 0.5
WIPF3	lobule vs duct	-0.214047	0.352516	0.926354	NS or Estimate < 0.5
C4orf51	lobule vs duct	0.145244	0.626197	0.976256	NS or Estimate < 0.5
UNC119B	lobule vs duct	-0.110445	0.758029	0.986115	NS or Estimate < 0.5
UNC13C	lobule vs duct	0.367507	0.290589	0.913334	NS or Estimate < 0.5
AKR1B15	lobule vs duct	0.555178	0.0789955	0.815643	NS or Estimate < 0.5
MGA	lobule vs duct	0.276477	0.354074	0.926354	NS or Estimate < 0.5
ZNF799	lobule vs duct	0.582327	0.0752989	0.814374	NS or Estimate < 0.5
TMEM120B	lobule vs duct	0.32104	0.368412	0.928448	NS or Estimate < 0.5
DMRTC1B	lobule vs duct	0.328177	0.276709	0.909958	NS or Estimate < 0.5
PXN	lobule vs duct	0.216388	0.591931	0.972449	NS or Estimate < 0.5
JMJD6	lobule vs duct	0.411186	0.257797	0.90361	NS or Estimate < 0.5
THOC2	lobule vs duct	-0.230301	0.409745	0.941085	NS or Estimate < 0.5
SPAG11A	lobule vs duct	-0.170709	0.457132	0.949883	NS or Estimate < 0.5
ELN	lobule vs duct	0.147995	0.518975	0.961095	NS or Estimate < 0.5
ACD	lobule vs duct	0.130271	0.661018	0.976256	NS or Estimate < 0.5
NKAPD1	lobule vs duct	-0.412084	0.190289	0.876139	NS or Estimate < 0.5
GPD2	lobule vs duct	0.348291	0.279418	0.910511	NS or Estimate < 0.5
ZNF133	lobule vs duct	0.5255	0.0238702	0.722021	P < 0.05
FAM86B1	lobule vs duct	-0.192393	0.471667	0.950909	NS or Estimate < 0.5
RABEP1	lobule vs duct	0.32014	0.443959	0.947109	NS or Estimate < 0.5
NARF	lobule vs duct	0.15118	0.677233	0.977911	NS or Estimate < 0.5
RB1CC1	lobule vs duct	0.189694	0.468115	0.950909	NS or Estimate < 0.5
STRN3	lobule vs duct	-0.10322	0.688537	0.978627	NS or Estimate < 0.5
GP6	lobule vs duct	-0.0783063	0.825914	0.987966	NS or Estimate < 0.5
BANK1	lobule vs duct	-0.0974607	0.746912	0.986115	NS or Estimate < 0.5
ADGRA1	lobule vs duct	-0.0151336	0.959825	0.997611	NS or Estimate < 0.5
WBP1L	lobule vs duct	0.118438	0.692414	0.979316	NS or Estimate < 0.5
ZNF655	lobule vs duct	-0.719756	0.0317611	0.744719	P < 0.05
TCF4	lobule vs duct	-0.076302	0.843303	0.988571	NS or Estimate < 0.5
PLOD3	lobule vs duct	-0.205242	0.508434	0.957212	NS or Estimate < 0.5
DDTL	lobule vs duct	0.0841779	0.732802	0.984474	NS or Estimate < 0.5
SERPINA3	lobule vs duct	0.811576	0.020623	0.705173	P < 0.05
MCC	lobule vs duct	0.316743	0.369185	0.928448	NS or Estimate < 0.5
TMEM213	lobule vs duct	0.126368	0.642649	0.976256	NS or Estimate < 0.5
MYSM1	lobule vs duct	0.0573697	0.834257	0.987966	NS or Estimate < 0.5
NDUFAF8	lobule vs duct	-0.0042625	0.986436	0.999774	NS or Estimate < 0.5
AAMP	lobule vs duct	0.452742	0.0636782	0.796953	NS or Estimate < 0.5
ABCA3	lobule vs duct	0.386581	0.148323	0.86699	NS or Estimate < 0.5
ABCF1	lobule vs duct	-0.278451	0.333204	0.920296	NS or Estimate < 0.5
ABR	lobule vs duct	-0.00745416	0.978156	0.999465	NS or Estimate < 0.5
ACACB	lobule vs duct	-0.146654	0.649558	0.976256	NS or Estimate < 0.5
CCDC102B	lobule vs duct	-0.466328	0.136581	0.859959	NS or Estimate < 0.5
TRAPPC13	lobule vs duct	0.586829	0.103177	0.851584	NS or Estimate < 0.5
MCRIP1	lobule vs duct	0.0129975	0.971552	0.998986	NS or Estimate < 0.5
ASIC1	lobule vs duct	-0.163825	0.597826	0.97334	NS or Estimate < 0.5
ACR	lobule vs duct	-0.0124785	0.969312	0.998679	NS or Estimate < 0.5
SPRR3	lobule vs duct	0.437842	0.173273	0.86699	NS or Estimate < 0.5
SLC35G2	lobule vs duct	-0.17758	0.614094	0.976256	NS or Estimate < 0.5
GPR89A	lobule vs duct	-0.495822	0.175452	0.86699	NS or Estimate < 0.5
TMEM184A	lobule vs duct	0.0634651	0.853586	0.991095	NS or Estimate < 0.5
ACO2	lobule vs duct	-0.242667	0.468218	0.950909	NS or Estimate < 0.5
GPR18	lobule vs duct	0.130772	0.669882	0.976256	NS or Estimate < 0.5
HNRNPF	lobule vs duct	0.278074	0.241488	0.901174	NS or Estimate < 0.5
CTNNB1	lobule vs duct	-0.161522	0.396274	0.938543	NS or Estimate < 0.5
HDAC7	lobule vs duct	-0.258364	0.197988	0.876417	NS or Estimate < 0.5
DLG1	lobule vs duct	-0.3206	0.313278	0.916726	NS or Estimate < 0.5
SMARCD2	lobule vs duct	-0.0016078	0.996109	0.99991	NS or Estimate < 0.5
GRSF1	lobule vs duct	-0.425262	0.241523	0.901174	NS or Estimate < 0.5
SLC4A4	lobule vs duct	0.134186	0.517518	0.961095	NS or Estimate < 0.5
ZNF419	lobule vs duct	0.0998772	0.718473	0.983566	NS or Estimate < 0.5
CHCHD4	lobule vs duct	-0.436278	0.264025	0.906983	NS or Estimate < 0.5
PTPRJ	lobule vs duct	0.493087	0.0840747	0.824864	NS or Estimate < 0.5
RAPGEF3	lobule vs duct	-0.679289	0.104991	0.854338	NS or Estimate < 0.5
SIGLEC14	lobule vs duct	0.00578003	0.986137	0.999774	NS or Estimate < 0.5
PUS7L	lobule vs duct	0.347462	0.392605	0.93585	NS or Estimate < 0.5
OBSCN	lobule vs duct	0.0161628	0.952788	0.997516	NS or Estimate < 0.5
RBM47	lobule vs duct	0.37565	0.248423	0.90203	NS or Estimate < 0.5
RNF169	lobule vs duct	0.314573	0.240225	0.900405	NS or Estimate < 0.5
GTF2H2C	lobule vs duct	0.345089	0.246497	0.90203	NS or Estimate < 0.5
BET1L	lobule vs duct	-0.454276	0.231785	0.897568	NS or Estimate < 0.5
CEP78	lobule vs duct	0.171434	0.64395	0.976256	NS or Estimate < 0.5
C9orf129	lobule vs duct	-0.799519	0.0185284	0.686957	P < 0.05
SEPTIN8	lobule vs duct	0.47524	0.123287	0.857685	NS or Estimate < 0.5
TMEM91	lobule vs duct	0.0814384	0.797011	0.98749	NS or Estimate < 0.5
RAD51AP2	lobule vs duct	-0.212152	0.521619	0.961095	NS or Estimate < 0.5
CCDC43	lobule vs duct	0.12307	0.738366	0.985211	NS or Estimate < 0.5
ZNF506	lobule vs duct	0.200598	0.488739	0.953765	NS or Estimate < 0.5
ZBTB34	lobule vs duct	0.137259	0.670228	0.976485	NS or Estimate < 0.5
TINF2	lobule vs duct	-0.272755	0.43387	0.943904	NS or Estimate < 0.5
MROH1	lobule vs duct	0.0123262	0.965671	0.998072	NS or Estimate < 0.5
NUTM2A	lobule vs duct	-0.225435	0.40227	0.939436	NS or Estimate < 0.5
COMMD7	lobule vs duct	-0.165296	0.515512	0.959809	NS or Estimate < 0.5
SGCE	lobule vs duct	0.103613	0.763622	0.986115	NS or Estimate < 0.5
KAT6A	lobule vs duct	0.35471	0.389116	0.934624	NS or Estimate < 0.5
BCAS3	lobule vs duct	0.468312	0.130086	0.858492	NS or Estimate < 0.5
ULK3	lobule vs duct	-0.308679	0.34756	0.92551	NS or Estimate < 0.5
CPPED1	lobule vs duct	-0.25844	0.518843	0.961095	NS or Estimate < 0.5
LRRC58	lobule vs duct	0.195587	0.499957	0.954999	NS or Estimate < 0.5
NXF2	lobule vs duct	0.163935	0.598211	0.97334	NS or Estimate < 0.5
EIF5AL1	lobule vs duct	-0.133892	0.601894	0.974047	NS or Estimate < 0.5
ZNF578	lobule vs duct	0.25789	0.249615	0.90203	NS or Estimate < 0.5
RSPH10B2	lobule vs duct	-0.164977	0.586461	0.969923	NS or Estimate < 0.5
FBXL19	lobule vs duct	0.367021	0.161116	0.86699	NS or Estimate < 0.5
ITPR1	lobule vs duct	0.235189	0.442793	0.947109	NS or Estimate < 0.5
PDS5A	lobule vs duct	0.0916451	0.643974	0.976256	NS or Estimate < 0.5
SENP6	lobule vs duct	-0.123072	0.616525	0.976256	NS or Estimate < 0.5
FAM184A	lobule vs duct	0.588383	0.087311	0.834268	NS or Estimate < 0.5
DROSHA	lobule vs duct	0.0849364	0.817514	0.987966	NS or Estimate < 0.5
UBR7	lobule vs duct	-0.140423	0.687585	0.978588	NS or Estimate < 0.5
REX1BD	lobule vs duct	-0.00485806	0.985905	0.999774	NS or Estimate < 0.5
SPATS2L	lobule vs duct	0.656217	0.0451423	0.77139	P < 0.05
RAP1GDS1	lobule vs duct	0.11923	0.695673	0.98069	NS or Estimate < 0.5
VSIG4	lobule vs duct	-0.133074	0.655142	0.976256	NS or Estimate < 0.5
PLEKHB2	lobule vs duct	0.198565	0.510935	0.957537	NS or Estimate < 0.5
CXCL16	lobule vs duct	0.122386	0.700288	0.981302	NS or Estimate < 0.5
TMEM176B	lobule vs duct	0.00788003	0.983223	0.999774	NS or Estimate < 0.5
ZNF883	lobule vs duct	-0.223508	0.469112	0.950909	NS or Estimate < 0.5
CCDC160	lobule vs duct	-0.721692	0.0261268	0.72667	P < 0.05
IGLON5	lobule vs duct	-0.334809	0.228473	0.897302	NS or Estimate < 0.5
CLDN25	lobule vs duct	0.184022	0.539673	0.96181	NS or Estimate < 0.5
CXXC1	lobule vs duct	0.349817	0.255995	0.902597	NS or Estimate < 0.5
NRDC	lobule vs duct	-0.345445	0.285403	0.913334	NS or Estimate < 0.5
ACOX3	lobule vs duct	-0.408271	0.290023	0.913334	NS or Estimate < 0.5
ZNF219	lobule vs duct	0.0585749	0.836331	0.987966	NS or Estimate < 0.5
SAMD12	lobule vs duct	0.178962	0.606499	0.974958	NS or Estimate < 0.5
FAM13B	lobule vs duct	-0.131495	0.569705	0.965162	NS or Estimate < 0.5
ACTN1	lobule vs duct	0.437195	0.136278	0.859959	NS or Estimate < 0.5
DGLUCY	lobule vs duct	0.000983238	0.997095	0.99991	NS or Estimate < 0.5
FOXRED2	lobule vs duct	0.240109	0.450361	0.948803	NS or Estimate < 0.5
TTI2	lobule vs duct	0.421129	0.162281	0.86699	NS or Estimate < 0.5
PCTP	lobule vs duct	0.298233	0.457152	0.949883	NS or Estimate < 0.5
RGS8	lobule vs duct	-0.128426	0.670489	0.976727	NS or Estimate < 0.5
AQP12B	lobule vs duct	0.117662	0.729917	0.984474	NS or Estimate < 0.5
IFT43	lobule vs duct	-0.0429561	0.905592	0.994961	NS or Estimate < 0.5
COL6A6	lobule vs duct	-0.735955	0.0351853	0.752819	P < 0.05
SLC35G6	lobule vs duct	-0.337519	0.354775	0.9265	NS or Estimate < 0.5
ZNF554	lobule vs duct	-0.241133	0.384912	0.932102	NS or Estimate < 0.5
ZNF836	lobule vs duct	-0.51841	0.21126	0.890656	NS or Estimate < 0.5
RRAS2	lobule vs duct	-0.130837	0.720322	0.984261	NS or Estimate < 0.5
GIGYF2	lobule vs duct	0.0806786	0.793408	0.986989	NS or Estimate < 0.5
PNMA8A	lobule vs duct	0.0799199	0.809592	0.987966	NS or Estimate < 0.5
AADACL3	lobule vs duct	0.0324591	0.942777	0.996715	NS or Estimate < 0.5
BICDL2	lobule vs duct	0.194693	0.506206	0.956178	NS or Estimate < 0.5
CNPY1	lobule vs duct	-0.331336	0.364533	0.928448	NS or Estimate < 0.5
ACVR1	lobule vs duct	-0.0324696	0.922119	0.994961	NS or Estimate < 0.5
FBRS	lobule vs duct	-0.0796108	0.503631	0.954999	NS or Estimate < 0.5
LAMA4	lobule vs duct	-0.179797	0.606075	0.974958	NS or Estimate < 0.5
ASH2L	lobule vs duct	-0.314841	0.198692	0.876417	NS or Estimate < 0.5
CORO1C	lobule vs duct	0.133152	0.643279	0.976256	NS or Estimate < 0.5
ARMC5	lobule vs duct	0.064446	0.834192	0.987966	NS or Estimate < 0.5
ZFYVE16	lobule vs duct	0.250179	0.470559	0.950909	NS or Estimate < 0.5
SWT1	lobule vs duct	-0.300155	0.391818	0.93559	NS or Estimate < 0.5
NUDT19	lobule vs duct	-0.0117565	0.97071	0.998986	NS or Estimate < 0.5
HMX3	lobule vs duct	0.191073	0.530963	0.96181	NS or Estimate < 0.5
SOWAHD	lobule vs duct	0.493465	0.155847	0.86699	NS or Estimate < 0.5
LRRC30	lobule vs duct	0.305337	0.396974	0.938771	NS or Estimate < 0.5
TTC24	lobule vs duct	0.0231877	0.94075	0.996677	NS or Estimate < 0.5
ACYP1	lobule vs duct	-0.0879748	0.809889	0.987966	NS or Estimate < 0.5
HECTD4	lobule vs duct	0.230643	0.498456	0.954999	NS or Estimate < 0.5
GSG1L	lobule vs duct	0.233579	0.454761	0.949883	NS or Estimate < 0.5
ZFP57	lobule vs duct	0.457664	0.256278	0.902597	NS or Estimate < 0.5
SYNPO	lobule vs duct	0.321986	0.314191	0.916726	NS or Estimate < 0.5
FAM160A1	lobule vs duct	0.2173	0.568049	0.964993	NS or Estimate < 0.5
ADAM10	lobule vs duct	0.398115	0.248586	0.90203	NS or Estimate < 0.5
PRH2	lobule vs duct	0.497907	0.111613	0.854338	NS or Estimate < 0.5
TMEM87A	lobule vs duct	0.701272	0.0641512	0.796953	NS or Estimate < 0.5
SLC35E2B	lobule vs duct	0.125129	0.743569	0.986115	NS or Estimate < 0.5
MECP2	lobule vs duct	0.0318813	0.910465	0.994961	NS or Estimate < 0.5
NAA16	lobule vs duct	-0.0177013	0.95811	0.997611	NS or Estimate < 0.5
ADAR	lobule vs duct	0.31425	0.248934	0.90203	NS or Estimate < 0.5
NAV2	lobule vs duct	-0.0758958	0.829127	0.987966	NS or Estimate < 0.5
NHLH2	lobule vs duct	0.213637	0.423187	0.943641	NS or Estimate < 0.5
ARHGEF25	lobule vs duct	-0.639228	0.0381506	0.75973	P < 0.05
DDX54	lobule vs duct	-0.219935	0.424937	0.943641	NS or Estimate < 0.5
TASOR	lobule vs duct	0.181288	0.437	0.944861	NS or Estimate < 0.5
TSTD1	lobule vs duct	0.319744	0.225086	0.897302	NS or Estimate < 0.5
TEN1	lobule vs duct	0.0632468	0.855047	0.99113	NS or Estimate < 0.5
TBC1D14	lobule vs duct	-0.20088	0.523451	0.961095	NS or Estimate < 0.5
FER1L5	lobule vs duct	0.691933	0.0790628	0.815643	NS or Estimate < 0.5
LDB1	lobule vs duct	-0.0772268	0.742636	0.985997	NS or Estimate < 0.5
ARHGEF7	lobule vs duct	0.356142	0.335694	0.921005	NS or Estimate < 0.5
ZNF276	lobule vs duct	0.196402	0.579555	0.969893	NS or Estimate < 0.5
LIMA1	lobule vs duct	0.418811	0.113907	0.854338	NS or Estimate < 0.5
RNF180	lobule vs duct	-0.174359	0.645686	0.976256	NS or Estimate < 0.5
ENTPD6	lobule vs duct	0.273817	0.363542	0.928448	NS or Estimate < 0.5
LSM14A	lobule vs duct	0.219946	0.456701	0.949883	NS or Estimate < 0.5
C1QC	lobule vs duct	0.00511777	0.986575	0.999774	NS or Estimate < 0.5
SLC44A3	lobule vs duct	0.513422	0.0642699	0.796953	NS or Estimate < 0.5
TTC22	lobule vs duct	0.05065	0.866265	0.992144	NS or Estimate < 0.5
CTSC	lobule vs duct	-0.220266	0.518071	0.961095	NS or Estimate < 0.5
AEBP2	lobule vs duct	-0.2471	0.305674	0.916041	NS or Estimate < 0.5
CLCN7	lobule vs duct	0.26476	0.349297	0.92551	NS or Estimate < 0.5
TENT2	lobule vs duct	-0.426274	0.154694	0.86699	NS or Estimate < 0.5
DHX36	lobule vs duct	0.362392	0.27865	0.910243	NS or Estimate < 0.5
SZRD1	lobule vs duct	-0.584877	0.0760279	0.814374	NS or Estimate < 0.5
JMJD7	lobule vs duct	0.150045	0.561547	0.963909	NS or Estimate < 0.5
FANCL	lobule vs duct	-0.197523	0.471106	0.950909	NS or Estimate < 0.5
PRRT4	lobule vs duct	-0.0164528	0.963038	0.997692	NS or Estimate < 0.5
TMEM240	lobule vs duct	0.117263	0.713212	0.982545	NS or Estimate < 0.5
ENG	lobule vs duct	-0.512293	0.110841	0.854338	NS or Estimate < 0.5
ADCY8	lobule vs duct	-0.230976	0.496228	0.954392	NS or Estimate < 0.5
KANSL3	lobule vs duct	0.75739	0.0409135	0.761804	P < 0.05
WDR26	lobule vs duct	0.365478	0.245259	0.90203	NS or Estimate < 0.5
ADCY9	lobule vs duct	0.353284	0.351482	0.926354	NS or Estimate < 0.5
ADCYAP1	lobule vs duct	-0.229771	0.486907	0.953765	NS or Estimate < 0.5
ADD1	lobule vs duct	-0.217762	0.458584	0.949883	NS or Estimate < 0.5
ADD3	lobule vs duct	0.0249378	0.939063	0.996677	NS or Estimate < 0.5
PLIN2	lobule vs duct	0.540454	0.0349279	0.752819	P < 0.05
ABCD3	lobule vs duct	0.271889	0.348331	0.92551	NS or Estimate < 0.5
TENM2	lobule vs duct	0.0859736	0.809167	0.987966	NS or Estimate < 0.5
PRR32	lobule vs duct	-0.0867353	0.766978	0.986115	NS or Estimate < 0.5
ZBTB37	lobule vs duct	0.0587556	0.839528	0.988542	NS or Estimate < 0.5
SLC50A1	lobule vs duct	-0.32738	0.102277	0.851584	NS or Estimate < 0.5
NAPEPLD	lobule vs duct	-0.683346	0.0386832	0.75973	P < 0.05
GGT6	lobule vs duct	0.194972	0.534516	0.96181	NS or Estimate < 0.5
C1orf194	lobule vs duct	-0.33188	0.366781	0.928448	NS or Estimate < 0.5
RPTN	lobule vs duct	-0.195266	0.539181	0.96181	NS or Estimate < 0.5
ADK	lobule vs duct	0.308916	0.411193	0.941085	NS or Estimate < 0.5
ARIH2OS	lobule vs duct	0.711128	0.0393105	0.75973	P < 0.05
CCR2	lobule vs duct	0.314367	0.243116	0.901983	NS or Estimate < 0.5
ZBTB1	lobule vs duct	0.227273	0.313937	0.916726	NS or Estimate < 0.5
PARK7	lobule vs duct	-0.02888	0.897321	0.994961	NS or Estimate < 0.5
ADSL	lobule vs duct	0.18662	0.432307	0.943904	NS or Estimate < 0.5
KRTAP2-1	lobule vs duct	-0.0679486	0.847637	0.989692	NS or Estimate < 0.5
ADM	lobule vs duct	-0.654946	0.0719687	0.808663	NS or Estimate < 0.5
PABPC1L	lobule vs duct	-0.00849567	0.982289	0.999774	NS or Estimate < 0.5
CASK	lobule vs duct	0.0396517	0.882399	0.993234	NS or Estimate < 0.5
SLC12A3	lobule vs duct	0.0283165	0.919613	0.994961	NS or Estimate < 0.5
SLC25A19	lobule vs duct	0.538446	0.133982	0.859959	NS or Estimate < 0.5
THTPA	lobule vs duct	-0.0941941	0.78814	0.986712	NS or Estimate < 0.5
PIGG	lobule vs duct	0.0512321	0.789081	0.986712	NS or Estimate < 0.5
MYO7A	lobule vs duct	0.372201	0.369563	0.928448	NS or Estimate < 0.5
CENPL	lobule vs duct	0.0941437	0.746703	0.986115	NS or Estimate < 0.5
CFLAR	lobule vs duct	0.225878	0.521396	0.961095	NS or Estimate < 0.5
PCID2	lobule vs duct	0.281039	0.351429	0.926354	NS or Estimate < 0.5
HMOX2	lobule vs duct	-0.557383	0.146361	0.86699	NS or Estimate < 0.5
TET2	lobule vs duct	0.00578172	0.978077	0.999465	NS or Estimate < 0.5
AURKAIP1	lobule vs duct	0.136515	0.611231	0.975348	NS or Estimate < 0.5
GPBP1	lobule vs duct	-0.100732	0.75423	0.986115	NS or Estimate < 0.5
UBAP2L	lobule vs duct	-0.119997	0.716329	0.982964	NS or Estimate < 0.5
MAD2L2	lobule vs duct	-0.184231	0.595309	0.973137	NS or Estimate < 0.5
CDCA7L	lobule vs duct	0.111391	0.677847	0.977911	NS or Estimate < 0.5
MYRF	lobule vs duct	-0.571301	0.0841322	0.824864	NS or Estimate < 0.5
STXBP2	lobule vs duct	0.0394228	0.909795	0.994961	NS or Estimate < 0.5
YPEL5	lobule vs duct	0.334038	0.312199	0.916726	NS or Estimate < 0.5
CRY2	lobule vs duct	-0.286845	0.33895	0.921704	NS or Estimate < 0.5
ZNF469	lobule vs duct	0.513488	0.0834583	0.824284	NS or Estimate < 0.5
ANK2	lobule vs duct	0.0873897	0.817328	0.987966	NS or Estimate < 0.5
ING4	lobule vs duct	0.309253	0.299806	0.914954	NS or Estimate < 0.5
KCNE1	lobule vs duct	0.0718047	0.776275	0.986115	NS or Estimate < 0.5
BEX4	lobule vs duct	-0.124369	0.700055	0.981302	NS or Estimate < 0.5
CTSA	lobule vs duct	-0.018456	0.959638	0.997611	NS or Estimate < 0.5
ETFA	lobule vs duct	-0.400246	0.164793	0.86699	NS or Estimate < 0.5
CEACAM19	lobule vs duct	0.119168	0.757	0.986115	NS or Estimate < 0.5
KRTAP20-3	lobule vs duct	0.156246	0.527128	0.961095	NS or Estimate < 0.5
AP4S1	lobule vs duct	0.245618	0.431031	0.943904	NS or Estimate < 0.5
ZEB1	lobule vs duct	0.0298448	0.917132	0.994961	NS or Estimate < 0.5
ATXN7	lobule vs duct	0.453184	0.09521	0.838659	NS or Estimate < 0.5
UBP1	lobule vs duct	0.400272	0.141138	0.863579	NS or Estimate < 0.5
PAK3	lobule vs duct	-0.4826	0.175413	0.86699	NS or Estimate < 0.5
UGT8	lobule vs duct	-0.186114	0.636404	0.976256	NS or Estimate < 0.5
SULF1	lobule vs duct	-0.314345	0.221228	0.897302	NS or Estimate < 0.5
SPRED2	lobule vs duct	-0.348199	0.331047	0.919454	NS or Estimate < 0.5
WDSUB1	lobule vs duct	-0.17552	0.539264	0.96181	NS or Estimate < 0.5
VGLL4	lobule vs duct	0.238839	0.424771	0.943641	NS or Estimate < 0.5
SLC39A13	lobule vs duct	-0.2862	0.21911	0.895093	NS or Estimate < 0.5
DIS3	lobule vs duct	-0.0061778	0.986589	0.999774	NS or Estimate < 0.5
TPRN	lobule vs duct	-0.172536	0.593313	0.97305	NS or Estimate < 0.5
LYRM1	lobule vs duct	0.650745	0.0347595	0.751537	P < 0.05
LACC1	lobule vs duct	0.0136403	0.965794	0.998072	NS or Estimate < 0.5
TSPAN14	lobule vs duct	0.331202	0.263325	0.906283	NS or Estimate < 0.5
MPV17L	lobule vs duct	0.0528799	0.840686	0.988571	NS or Estimate < 0.5
AP1AR	lobule vs duct	0.370436	0.255161	0.902597	NS or Estimate < 0.5
MAPKBP1	lobule vs duct	-0.192654	0.323928	0.917495	NS or Estimate < 0.5
USP8	lobule vs duct	-0.171266	0.543485	0.963065	NS or Estimate < 0.5
NUDT22	lobule vs duct	-0.0937555	0.775487	0.986115	NS or Estimate < 0.5
ARHGEF3	lobule vs duct	0.47586	0.0599847	0.796953	NS or Estimate < 0.5
REPS1	lobule vs duct	-0.189202	0.648111	0.976256	NS or Estimate < 0.5
SPIRE1	lobule vs duct	-0.37857	0.217934	0.894762	NS or Estimate < 0.5
NCS1	lobule vs duct	0.598777	0.25012	0.90203	NS or Estimate < 0.5
TOMM40	lobule vs duct	-0.0952276	0.767142	0.986115	NS or Estimate < 0.5
ENTPD4	lobule vs duct	-0.522083	0.0833018	0.824284	NS or Estimate < 0.5
NAF1	lobule vs duct	0.338017	0.396131	0.93847	NS or Estimate < 0.5
SYNPO2	lobule vs duct	0.419563	0.214696	0.892037	NS or Estimate < 0.5
AEBP1	lobule vs duct	-0.176423	0.587003	0.970101	NS or Estimate < 0.5
NSDHL	lobule vs duct	-0.138231	0.717334	0.983029	NS or Estimate < 0.5
INSYN2B	lobule vs duct	-0.0715953	0.830439	0.987966	NS or Estimate < 0.5
SYTL4	lobule vs duct	0.0586847	0.828437	0.987966	NS or Estimate < 0.5
KRBOX4	lobule vs duct	0.243932	0.478888	0.951659	NS or Estimate < 0.5
GASK1A	lobule vs duct	-0.476495	0.168554	0.86699	NS or Estimate < 0.5
CLEC12B	lobule vs duct	0.108594	0.671995	0.977509	NS or Estimate < 0.5
SLC9A3R2	lobule vs duct	0.220038	0.433035	0.943904	NS or Estimate < 0.5
ANKRD33	lobule vs duct	0.37207	0.264654	0.906983	NS or Estimate < 0.5
ATP6V0A1	lobule vs duct	0.224406	0.362342	0.928448	NS or Estimate < 0.5
ZNF562	lobule vs duct	-0.163111	0.669363	0.976256	NS or Estimate < 0.5
SHC1	lobule vs duct	0.00330892	0.986728	0.999774	NS or Estimate < 0.5
DOCK9	lobule vs duct	-0.217634	0.572979	0.966953	NS or Estimate < 0.5
ATF7	lobule vs duct	0.674042	0.0530929	0.778973	NS or Estimate < 0.5
PLD1	lobule vs duct	0.402127	0.112063	0.854338	NS or Estimate < 0.5
PLXNB1	lobule vs duct	-0.281287	0.325998	0.91821	NS or Estimate < 0.5
ABHD17A	lobule vs duct	-0.349838	0.193822	0.876417	NS or Estimate < 0.5
ERAP2	lobule vs duct	-0.00484704	0.986817	0.999774	NS or Estimate < 0.5
LTBP3	lobule vs duct	0.0699916	0.815594	0.987966	NS or Estimate < 0.5
YAP1	lobule vs duct	0.0146714	0.937023	0.996635	NS or Estimate < 0.5
MYO1B	lobule vs duct	0.059258	0.836237	0.987966	NS or Estimate < 0.5
DNAJA4	lobule vs duct	0.015299	0.962694	0.997692	NS or Estimate < 0.5
ACAA1	lobule vs duct	0.383656	0.221975	0.897302	NS or Estimate < 0.5
SMARCC2	lobule vs duct	0.187022	0.419204	0.943641	NS or Estimate < 0.5
C15orf62	lobule vs duct	-0.00336396	0.992063	0.99991	NS or Estimate < 0.5
THAP5	lobule vs duct	0.199631	0.503201	0.954999	NS or Estimate < 0.5
ERICH4	lobule vs duct	0.24372	0.464737	0.950909	NS or Estimate < 0.5
AP1M1	lobule vs duct	0.165508	0.606004	0.974958	NS or Estimate < 0.5
SPAG9	lobule vs duct	0.0845181	0.735408	0.985211	NS or Estimate < 0.5
EIF4E	lobule vs duct	-0.0535054	0.841843	0.988571	NS or Estimate < 0.5
GUCY1A1	lobule vs duct	0.0798605	0.808843	0.987966	NS or Estimate < 0.5
HMGB2	lobule vs duct	0.3837	0.271629	0.907759	NS or Estimate < 0.5
RUFY3	lobule vs duct	0.336505	0.239718	0.899501	NS or Estimate < 0.5
AHCYL2	lobule vs duct	0.212737	0.526598	0.961095	NS or Estimate < 0.5
IFT22	lobule vs duct	0.482223	0.141591	0.863579	NS or Estimate < 0.5
RTCA	lobule vs duct	-0.00357155	0.990807	0.99991	NS or Estimate < 0.5
PITPNM1	lobule vs duct	0.31603	0.318591	0.916726	NS or Estimate < 0.5
CAB39	lobule vs duct	0.0449379	0.876731	0.992144	NS or Estimate < 0.5
CBLC	lobule vs duct	-0.117406	0.730087	0.984474	NS or Estimate < 0.5
PPIP5K1	lobule vs duct	-0.523138	0.109247	0.854338	NS or Estimate < 0.5
CLDN5	lobule vs duct	-0.306866	0.287896	0.913334	NS or Estimate < 0.5
PWWP2A	lobule vs duct	0.65555	0.0441178	0.77139	P < 0.05
DMRT2	lobule vs duct	0.687769	0.0036235	0.529621	P < 0.05
SUGT1	lobule vs duct	-0.0242695	0.928654	0.994961	NS or Estimate < 0.5
RABL2B	lobule vs duct	0.320894	0.297511	0.914267	NS or Estimate < 0.5
NEMP1	lobule vs duct	-0.319597	0.354695	0.9265	NS or Estimate < 0.5
SUN1	lobule vs duct	0.382174	0.208492	0.889616	NS or Estimate < 0.5
ZNF385A	lobule vs duct	0.469302	0.175192	0.86699	NS or Estimate < 0.5
NSMF	lobule vs duct	0.322529	0.28961	0.913334	NS or Estimate < 0.5
CRISP1	lobule vs duct	0.0927552	0.786877	0.986712	NS or Estimate < 0.5
TMEM131L	lobule vs duct	-0.319484	0.320174	0.916726	NS or Estimate < 0.5
SATB1	lobule vs duct	0.420274	0.17655	0.86699	NS or Estimate < 0.5
PEX5	lobule vs duct	0.47659	0.148842	0.86699	NS or Estimate < 0.5
AP3M2	lobule vs duct	0.0974961	0.785863	0.986712	NS or Estimate < 0.5
PRR22	lobule vs duct	-0.224668	0.56449	0.964317	NS or Estimate < 0.5
STRIP2	lobule vs duct	0.316733	0.290603	0.913334	NS or Estimate < 0.5
PSMG3	lobule vs duct	0.0865317	0.701402	0.9815	NS or Estimate < 0.5
RBM20	lobule vs duct	0.428866	0.154216	0.86699	NS or Estimate < 0.5
SLC6A6	lobule vs duct	0.0686481	0.855856	0.99113	NS or Estimate < 0.5
TBC1D5	lobule vs duct	-0.0106462	0.972587	0.99918	NS or Estimate < 0.5
ZDHHC4	lobule vs duct	0.181903	0.553178	0.963227	NS or Estimate < 0.5
C7orf50	lobule vs duct	0.242365	0.455642	0.949883	NS or Estimate < 0.5
VAV2	lobule vs duct	0.134101	0.698186	0.98081	NS or Estimate < 0.5
CDV3	lobule vs duct	0.298456	0.377196	0.931084	NS or Estimate < 0.5
AZI2	lobule vs duct	0.0169344	0.960273	0.997611	NS or Estimate < 0.5
IQCG	lobule vs duct	0.351608	0.232096	0.897568	NS or Estimate < 0.5
LSMEM1	lobule vs duct	0.330324	0.337459	0.921005	NS or Estimate < 0.5
GSE1	lobule vs duct	0.0257345	0.943194	0.996715	NS or Estimate < 0.5
LRRC8B	lobule vs duct	0.473855	0.302425	0.915639	NS or Estimate < 0.5
LRRC8D	lobule vs duct	0.0604562	0.849136	0.990623	NS or Estimate < 0.5
TOMM6	lobule vs duct	0.195371	0.417001	0.942361	NS or Estimate < 0.5
AFAP1	lobule vs duct	0.0528252	0.886206	0.993644	NS or Estimate < 0.5
ZNF213	lobule vs duct	0.469809	0.144892	0.866148	NS or Estimate < 0.5
HOGA1	lobule vs duct	0.400332	0.158275	0.86699	NS or Estimate < 0.5
DERL1	lobule vs duct	-0.112161	0.700666	0.9815	NS or Estimate < 0.5
NFIA	lobule vs duct	-0.675424	0.0658341	0.798248	NS or Estimate < 0.5
OST4	lobule vs duct	-0.0224282	0.904447	0.994961	NS or Estimate < 0.5
SARDH	lobule vs duct	0.0543668	0.843798	0.988571	NS or Estimate < 0.5
DEK	lobule vs duct	-0.02866	0.899152	0.994961	NS or Estimate < 0.5
ARFRP1	lobule vs duct	0.238381	0.492656	0.954392	NS or Estimate < 0.5
KLC2	lobule vs duct	0.145657	0.679145	0.977911	NS or Estimate < 0.5
HYLS1	lobule vs duct	-0.00893639	0.980728	0.999774	NS or Estimate < 0.5
AHI1	lobule vs duct	-0.679987	0.0246059	0.725036	P < 0.05
PPP1R18	lobule vs duct	0.527854	0.195673	0.876417	NS or Estimate < 0.5
RTL1	lobule vs duct	-0.0716253	0.839394	0.988542	NS or Estimate < 0.5
FERMT2	lobule vs duct	0.308537	0.193873	0.876417	NS or Estimate < 0.5
ELMOD3	lobule vs duct	0.590752	0.0458632	0.77139	P < 0.05
JDP2	lobule vs duct	-0.121792	0.741076	0.985997	NS or Estimate < 0.5
DNAJA3	lobule vs duct	-0.155445	0.555986	0.963227	NS or Estimate < 0.5
CCDC36	lobule vs duct	-0.10373	0.767652	0.986115	NS or Estimate < 0.5
FKBP6	lobule vs duct	0.174125	0.579919	0.969893	NS or Estimate < 0.5
TAF12	lobule vs duct	-0.527481	0.144599	0.866148	NS or Estimate < 0.5
NDRG1	lobule vs duct	0.551608	0.0356462	0.756511	P < 0.05
PAX7	lobule vs duct	0.179958	0.520377	0.961095	NS or Estimate < 0.5
HSF2	lobule vs duct	-0.155313	0.557433	0.963227	NS or Estimate < 0.5
SMIM13	lobule vs duct	0.314342	0.296241	0.91336	NS or Estimate < 0.5
C5orf24	lobule vs duct	0.355268	0.36213	0.928448	NS or Estimate < 0.5
GDAP2	lobule vs duct	-0.0320623	0.925969	0.994961	NS or Estimate < 0.5
CLHC1	lobule vs duct	0.346478	0.26164	0.905486	NS or Estimate < 0.5
ARHGAP26	lobule vs duct	-0.383721	0.247979	0.90203	NS or Estimate < 0.5
PIP5K1A	lobule vs duct	-0.12835	0.701501	0.9815	NS or Estimate < 0.5
INPP5K	lobule vs duct	-0.807753	0.0230273	0.715791	P < 0.05
PTPRK	lobule vs duct	0.3249	0.312803	0.916726	NS or Estimate < 0.5
EIF2AK2	lobule vs duct	0.323356	0.244084	0.90203	NS or Estimate < 0.5
PABPC4	lobule vs duct	0.128695	0.629165	0.976256	NS or Estimate < 0.5
MSRA	lobule vs duct	-0.124728	0.694787	0.980654	NS or Estimate < 0.5
ATL2	lobule vs duct	-0.470406	0.14124	0.863579	NS or Estimate < 0.5
SMIM19	lobule vs duct	-0.278375	0.273085	0.907759	NS or Estimate < 0.5
DERL3	lobule vs duct	-0.0359862	0.911219	0.994961	NS or Estimate < 0.5
ECD	lobule vs duct	-0.442477	0.0988047	0.847757	NS or Estimate < 0.5
RPN2	lobule vs duct	0.315386	0.103953	0.851584	NS or Estimate < 0.5
LRP5L	lobule vs duct	0.273811	0.295217	0.913334	NS or Estimate < 0.5
ZBTB43	lobule vs duct	-0.614712	0.0921745	0.836048	NS or Estimate < 0.5
FDPS	lobule vs duct	0.189574	0.514362	0.95963	NS or Estimate < 0.5
RNF185	lobule vs duct	0.367676	0.226943	0.897302	NS or Estimate < 0.5
POSTN	lobule vs duct	0.0206188	0.933625	0.996171	NS or Estimate < 0.5
MYOT	lobule vs duct	-0.0145206	0.962076	0.997692	NS or Estimate < 0.5
GKAP1	lobule vs duct	-0.503194	0.126914	0.858492	NS or Estimate < 0.5
TRPC4	lobule vs duct	0.517648	0.0868341	0.833769	NS or Estimate < 0.5
NDUFB11	lobule vs duct	0.0158609	0.957918	0.997611	NS or Estimate < 0.5
ABL2	lobule vs duct	-0.0985932	0.770679	0.986115	NS or Estimate < 0.5
C2CD4D	lobule vs duct	-0.280049	0.407311	0.940111	NS or Estimate < 0.5
NFATC4	lobule vs duct	-0.0968132	0.810721	0.987966	NS or Estimate < 0.5
PUF60	lobule vs duct	0.159211	0.625316	0.976256	NS or Estimate < 0.5
TRMT1	lobule vs duct	0.101822	0.701851	0.981617	NS or Estimate < 0.5
ZNF692	lobule vs duct	0.0872106	0.771025	0.986115	NS or Estimate < 0.5
LIMS2	lobule vs duct	0.447545	0.167835	0.86699	NS or Estimate < 0.5
ZNF415	lobule vs duct	-0.115741	0.720981	0.984474	NS or Estimate < 0.5
LRIG3	lobule vs duct	0.0732336	0.802317	0.987966	NS or Estimate < 0.5
COLCA2	lobule vs duct	-0.0374916	0.924463	0.994961	NS or Estimate < 0.5
BEAN1	lobule vs duct	0.236277	0.509787	0.957537	NS or Estimate < 0.5
R3HCC1	lobule vs duct	-0.218631	0.567163	0.964993	NS or Estimate < 0.5
FBXO28	lobule vs duct	-0.0430587	0.899528	0.994961	NS or Estimate < 0.5
SLF2	lobule vs duct	-0.0268792	0.923611	0.994961	NS or Estimate < 0.5
ALG1L2	lobule vs duct	0.0329735	0.904968	0.994961	NS or Estimate < 0.5
OTUD5	lobule vs duct	0.312456	0.217977	0.894762	NS or Estimate < 0.5
HSBP1L1	lobule vs duct	0.401315	0.236104	0.898455	NS or Estimate < 0.5
LAX1	lobule vs duct	-0.222078	0.358212	0.927315	NS or Estimate < 0.5
FZR1	lobule vs duct	0.0579631	0.877863	0.992465	NS or Estimate < 0.5
GRAMD1A	lobule vs duct	0.0825753	0.737529	0.985211	NS or Estimate < 0.5
BORCS7	lobule vs duct	-0.511028	0.0542193	0.778973	NS or Estimate < 0.5
RCOR3	lobule vs duct	-0.194371	0.227741	0.897302	NS or Estimate < 0.5
ATXN7L3B	lobule vs duct	-0.107702	0.741678	0.985997	NS or Estimate < 0.5
IFFO2	lobule vs duct	0.283716	0.320933	0.916726	NS or Estimate < 0.5
DAZAP2	lobule vs duct	-0.119325	0.632947	0.976256	NS or Estimate < 0.5
AKIRIN1	lobule vs duct	-0.190785	0.648868	0.976256	NS or Estimate < 0.5
ANP32E	lobule vs duct	-0.0643235	0.841884	0.988571	NS or Estimate < 0.5
C19orf38	lobule vs duct	-0.21743	0.444376	0.947109	NS or Estimate < 0.5
C1orf198	lobule vs duct	0.718719	0.0508154	0.778973	NS or Estimate < 0.5
BTF3L4	lobule vs duct	0.079885	0.809146	0.987966	NS or Estimate < 0.5
ZNF841	lobule vs duct	-0.385638	0.227177	0.897302	NS or Estimate < 0.5
ZNF844	lobule vs duct	0.205641	0.488991	0.953765	NS or Estimate < 0.5
SYT2	lobule vs duct	-0.0736348	0.824907	0.987966	NS or Estimate < 0.5
BTBD19	lobule vs duct	0.184552	0.589461	0.971122	NS or Estimate < 0.5
ACAD10	lobule vs duct	-0.264916	0.431507	0.943904	NS or Estimate < 0.5
TLK1	lobule vs duct	-0.0350239	0.914662	0.994961	NS or Estimate < 0.5
ZAR1L	lobule vs duct	-0.0943712	0.781127	0.986291	NS or Estimate < 0.5
LRRFIP1	lobule vs duct	0.1479	0.593415	0.97305	NS or Estimate < 0.5
TMEM151B	lobule vs duct	-0.106849	0.711793	0.982545	NS or Estimate < 0.5
ILF3	lobule vs duct	-0.2697	0.150866	0.86699	NS or Estimate < 0.5
ATXN1L	lobule vs duct	0.184839	0.557382	0.963227	NS or Estimate < 0.5
SVOPL	lobule vs duct	-0.18148	0.442587	0.947091	NS or Estimate < 0.5
BCAP31	lobule vs duct	0.0287057	0.915347	0.994961	NS or Estimate < 0.5
CNST	lobule vs duct	-0.0985932	0.788338	0.986712	NS or Estimate < 0.5
ALOX15	lobule vs duct	0.395657	0.256807	0.902927	NS or Estimate < 0.5
ATP13A2	lobule vs duct	-0.0406053	0.899614	0.994961	NS or Estimate < 0.5
TP53BP1	lobule vs duct	0.167735	0.407726	0.940111	NS or Estimate < 0.5
NIPA1	lobule vs duct	0.112546	0.736456	0.985211	NS or Estimate < 0.5
RNASEH2B	lobule vs duct	0.347262	0.270963	0.907759	NS or Estimate < 0.5
SEMA4D	lobule vs duct	-0.0316977	0.919294	0.994961	NS or Estimate < 0.5
EMC8	lobule vs duct	0.462964	0.247315	0.90203	NS or Estimate < 0.5
MGRN1	lobule vs duct	0.0699004	0.838251	0.988542	NS or Estimate < 0.5
ARFGAP3	lobule vs duct	0.00603872	0.981613	0.999774	NS or Estimate < 0.5
SPART	lobule vs duct	-0.191928	0.540593	0.96181	NS or Estimate < 0.5
TMEM169	lobule vs duct	0.338381	0.324874	0.918121	NS or Estimate < 0.5
DMTF1	lobule vs duct	-0.476185	0.0835954	0.824284	NS or Estimate < 0.5
THOC6	lobule vs duct	0.101177	0.688861	0.978642	NS or Estimate < 0.5
NEDD9	lobule vs duct	0.0578621	0.859836	0.992144	NS or Estimate < 0.5
CTIF	lobule vs duct	-0.232066	0.400743	0.939436	NS or Estimate < 0.5
MORF4L2	lobule vs duct	-0.0768638	0.786474	0.986712	NS or Estimate < 0.5
EDC3	lobule vs duct	-0.704431	0.0245084	0.725036	P < 0.05
HES4	lobule vs duct	-0.159098	0.79813	0.987966	NS or Estimate < 0.5
BMERB1	lobule vs duct	-0.312884	0.115734	0.854338	NS or Estimate < 0.5
INTS12	lobule vs duct	0.328752	0.423481	0.943641	NS or Estimate < 0.5
NREP	lobule vs duct	-0.423963	0.175802	0.86699	NS or Estimate < 0.5
FLYWCH2	lobule vs duct	0.189239	0.429529	0.943641	NS or Estimate < 0.5
SLC35B3	lobule vs duct	0.800963	0.0120393	0.626509	P < 0.05
CPSF7	lobule vs duct	0.310009	0.260636	0.904569	NS or Estimate < 0.5
BBX	lobule vs duct	-0.0145151	0.958604	0.997611	NS or Estimate < 0.5
ZNF780A	lobule vs duct	-0.0735788	0.810381	0.987966	NS or Estimate < 0.5
NFYC	lobule vs duct	-0.422755	0.157147	0.86699	NS or Estimate < 0.5
ITPK1	lobule vs duct	-0.395153	0.228799	0.897302	NS or Estimate < 0.5
EFTUD2	lobule vs duct	-0.218438	0.445533	0.947586	NS or Estimate < 0.5
TGFBRAP1	lobule vs duct	0.117331	0.695684	0.98069	NS or Estimate < 0.5
PIK3R5	lobule vs duct	-0.00710298	0.981449	0.999774	NS or Estimate < 0.5
TNRC6C	lobule vs duct	0.171429	0.640151	0.976256	NS or Estimate < 0.5
HNRNPLL	lobule vs duct	-0.111962	0.671821	0.977509	NS or Estimate < 0.5
PTGES3L	lobule vs duct	0.413961	0.288971	0.913334	NS or Estimate < 0.5
ATG13	lobule vs duct	0.180796	0.582523	0.969923	NS or Estimate < 0.5
CHID1	lobule vs duct	-0.128024	0.649975	0.976256	NS or Estimate < 0.5
ARHGAP32	lobule vs duct	0.462851	0.223389	0.897302	NS or Estimate < 0.5
FAM111B	lobule vs duct	0.343388	0.174731	0.86699	NS or Estimate < 0.5
ERI2	lobule vs duct	0.398191	0.214365	0.892037	NS or Estimate < 0.5
HSD3B7	lobule vs duct	0.280826	0.376433	0.931006	NS or Estimate < 0.5
C17orf49	lobule vs duct	-0.03601	0.906423	0.994961	NS or Estimate < 0.5
SLC6A8	lobule vs duct	0.0936332	0.713379	0.982545	NS or Estimate < 0.5
PIEZO1	lobule vs duct	-0.521678	0.345515	0.92451	NS or Estimate < 0.5
API5	lobule vs duct	0.0446471	0.904435	0.994961	NS or Estimate < 0.5
AMIGO2	lobule vs duct	-0.226782	0.591374	0.972213	NS or Estimate < 0.5
MPC2	lobule vs duct	0.0338773	0.876866	0.992144	NS or Estimate < 0.5
FAM13C	lobule vs duct	-0.239157	0.502998	0.954999	NS or Estimate < 0.5
CTDNEP1	lobule vs duct	0.26218	0.301056	0.915639	NS or Estimate < 0.5
SLC25A39	lobule vs duct	-0.270597	0.246473	0.90203	NS or Estimate < 0.5
TPCN1	lobule vs duct	-0.0848975	0.796825	0.987379	NS or Estimate < 0.5
MAPRE2	lobule vs duct	0.0950299	0.761755	0.986115	NS or Estimate < 0.5
HRH4	lobule vs duct	0.168845	0.608	0.975028	NS or Estimate < 0.5
CCDC68	lobule vs duct	0.00662691	0.984476	0.999774	NS or Estimate < 0.5
LEUTX	lobule vs duct	0.348642	0.237528	0.898455	NS or Estimate < 0.5
NOX4	lobule vs duct	0.0481906	0.878953	0.992725	NS or Estimate < 0.5
TCTN2	lobule vs duct	0.266753	0.448367	0.94784	NS or Estimate < 0.5
TCHP	lobule vs duct	0.140703	0.705359	0.982545	NS or Estimate < 0.5
RPH3A	lobule vs duct	0.665765	0.082104	0.82067	NS or Estimate < 0.5
BSDC1	lobule vs duct	0.550254	0.0697718	0.805808	NS or Estimate < 0.5
TMEM30A	lobule vs duct	0.295071	0.03133	0.743721	NS or Estimate < 0.5
CAPN8	lobule vs duct	0.697391	0.0668107	0.799939	NS or Estimate < 0.5
TBC1D7	lobule vs duct	0.334585	0.368264	0.928448	NS or Estimate < 0.5
UBTFL1	lobule vs duct	-0.00437506	0.988639	0.999774	NS or Estimate < 0.5
NDE1	lobule vs duct	-0.0400305	0.898345	0.994961	NS or Estimate < 0.5
BANF1	lobule vs duct	0.216201	0.438807	0.945288	NS or Estimate < 0.5
TLE6	lobule vs duct	0.550416	0.0631225	0.796953	NS or Estimate < 0.5
NBPF6	lobule vs duct	-0.0916411	0.757161	0.986115	NS or Estimate < 0.5
WRAP53	lobule vs duct	0.0990928	0.802413	0.987966	NS or Estimate < 0.5
AMFR	lobule vs duct	-0.256876	0.354598	0.9265	NS or Estimate < 0.5
TMX2	lobule vs duct	-0.292837	0.366388	0.928448	NS or Estimate < 0.5
NHSL1	lobule vs duct	0.0167224	0.947258	0.996943	NS or Estimate < 0.5
COPB1	lobule vs duct	-0.350114	0.292572	0.913334	NS or Estimate < 0.5
ABCC3	lobule vs duct	0.394485	0.167961	0.86699	NS or Estimate < 0.5
LDHAL6A	lobule vs duct	0.457835	0.17126	0.86699	NS or Estimate < 0.5
DET1	lobule vs duct	-0.0113009	0.974731	0.999465	NS or Estimate < 0.5
PHLDB1	lobule vs duct	-0.636908	0.0787906	0.815643	NS or Estimate < 0.5
TLE2	lobule vs duct	0.316305	0.362881	0.928448	NS or Estimate < 0.5
DENND4A	lobule vs duct	-0.168127	0.608831	0.975028	NS or Estimate < 0.5
VSTM5	lobule vs duct	-0.141519	0.668168	0.976256	NS or Estimate < 0.5
DOK3	lobule vs duct	0.0633357	0.814115	0.987966	NS or Estimate < 0.5
IMPA1	lobule vs duct	0.0576124	0.82014	0.987966	NS or Estimate < 0.5
MBIP	lobule vs duct	-0.223781	0.508083	0.956915	NS or Estimate < 0.5
MIEF2	lobule vs duct	-0.192341	0.543261	0.962957	NS or Estimate < 0.5
NKIRAS2	lobule vs duct	-0.207885	0.455018	0.949883	NS or Estimate < 0.5
MYL12B	lobule vs duct	0.235139	0.127717	0.858492	NS or Estimate < 0.5
MTHFD2L	lobule vs duct	0.205763	0.561859	0.963909	NS or Estimate < 0.5
CCDC169	lobule vs duct	-0.0928842	0.772834	0.986115	NS or Estimate < 0.5
ANG	lobule vs duct	0.196578	0.332851	0.920296	NS or Estimate < 0.5
MUC7	lobule vs duct	0.30852	0.42373	0.943641	NS or Estimate < 0.5
BTN3A1	lobule vs duct	-0.360752	0.172741	0.86699	NS or Estimate < 0.5
SCRN2	lobule vs duct	0.176225	0.635372	0.976256	NS or Estimate < 0.5
PLET1	lobule vs duct	0.269751	0.448277	0.94784	NS or Estimate < 0.5
PTPRQ	lobule vs duct	-0.235231	0.491372	0.954392	NS or Estimate < 0.5
IQCF5	lobule vs duct	-0.0793449	0.815889	0.987966	NS or Estimate < 0.5
COG6	lobule vs duct	0.470948	0.22481	0.897302	NS or Estimate < 0.5
ZNF619	lobule vs duct	0.187774	0.518438	0.961095	NS or Estimate < 0.5
RRP12	lobule vs duct	0.256915	0.400348	0.939359	NS or Estimate < 0.5
CAPN14	lobule vs duct	-0.0177177	0.958117	0.997611	NS or Estimate < 0.5
SLC1A5	lobule vs duct	0.135008	0.679927	0.977948	NS or Estimate < 0.5
CRHR1	lobule vs duct	0.368194	0.272632	0.907759	NS or Estimate < 0.5
UBE2QL1	lobule vs duct	0.0532145	0.882191	0.993234	NS or Estimate < 0.5
FAM200B	lobule vs duct	0.740662	0.028391	0.740832	P < 0.05
KIAA1671	lobule vs duct	-0.870821	0.0074478	0.608835	P < 0.05
ANKRD65	lobule vs duct	0.285513	0.40913	0.941045	NS or Estimate < 0.5
SLCO2B1	lobule vs duct	0.154479	0.641384	0.976256	NS or Estimate < 0.5
SP9	lobule vs duct	0.43689	0.0970658	0.846954	NS or Estimate < 0.5
LAMTOR2	lobule vs duct	-0.219622	0.50309	0.954999	NS or Estimate < 0.5
FAM185A	lobule vs duct	0.0134345	0.967233	0.998138	NS or Estimate < 0.5
NGLY1	lobule vs duct	0.241859	0.435926	0.944861	NS or Estimate < 0.5
EXOC7	lobule vs duct	-0.089583	0.72289	0.984474	NS or Estimate < 0.5
IQCN	lobule vs duct	0.0570846	0.853145	0.991095	NS or Estimate < 0.5
ETV3	lobule vs duct	0.214765	0.142743	0.866148	NS or Estimate < 0.5
UBE2Q2	lobule vs duct	-0.0699372	0.84198	0.988571	NS or Estimate < 0.5
MDM2	lobule vs duct	0.558142	0.121903	0.857185	NS or Estimate < 0.5
ZNF566	lobule vs duct	0.528311	0.0343471	0.748927	P < 0.05
ZNF576	lobule vs duct	0.225626	0.534525	0.96181	NS or Estimate < 0.5
IPP	lobule vs duct	-0.149652	0.695434	0.980654	NS or Estimate < 0.5
ELF1	lobule vs duct	0.20948	0.550002	0.963227	NS or Estimate < 0.5
MKLN1	lobule vs duct	0.0699518	0.841272	0.988571	NS or Estimate < 0.5
PTPN3	lobule vs duct	0.124557	0.721211	0.984474	NS or Estimate < 0.5
TSEN2	lobule vs duct	0.400227	0.230838	0.897568	NS or Estimate < 0.5
CCDC110	lobule vs duct	-0.0714154	0.825966	0.987966	NS or Estimate < 0.5
TMEM205	lobule vs duct	-0.796486	0.0208737	0.705173	P < 0.05
MSL2	lobule vs duct	0.0916264	0.760551	0.986115	NS or Estimate < 0.5
TTC28	lobule vs duct	0.460088	0.251022	0.90203	NS or Estimate < 0.5
NR1D2	lobule vs duct	-0.375053	0.318038	0.916726	NS or Estimate < 0.5
ZNF880	lobule vs duct	-0.20869	0.475739	0.951304	NS or Estimate < 0.5
SCAF4	lobule vs duct	0.094858	0.768198	0.986115	NS or Estimate < 0.5
ZNF200	lobule vs duct	-0.159085	0.630716	0.976256	NS or Estimate < 0.5
SCRN1	lobule vs duct	0.346298	0.17387	0.86699	NS or Estimate < 0.5
YPEL3	lobule vs duct	-0.289242	0.233312	0.898455	NS or Estimate < 0.5
ZSCAN18	lobule vs duct	0.163193	0.62759	0.976256	NS or Estimate < 0.5
TRIM45	lobule vs duct	0.051509	0.860285	0.992144	NS or Estimate < 0.5
APH1B	lobule vs duct	0.258056	0.382071	0.931646	NS or Estimate < 0.5
ZNF529	lobule vs duct	-0.201076	0.464835	0.950909	NS or Estimate < 0.5
CTAGE9	lobule vs duct	-0.340967	0.188696	0.873883	NS or Estimate < 0.5
RFX8	lobule vs duct	-0.144279	0.696752	0.98069	NS or Estimate < 0.5
GLG1	lobule vs duct	0.0846702	0.680957	0.977974	NS or Estimate < 0.5
SORBS2	lobule vs duct	0.700426	0.0258555	0.72667	P < 0.05
NUPR2	lobule vs duct	-0.267636	0.300729	0.915639	NS or Estimate < 0.5
CT47B1	lobule vs duct	0.353956	0.338449	0.921005	NS or Estimate < 0.5
FKBP5	lobule vs duct	-0.0819948	0.770235	0.986115	NS or Estimate < 0.5
BORCS8	lobule vs duct	0.277324	0.421307	0.943641	NS or Estimate < 0.5
SH2B1	lobule vs duct	-0.000704074	0.998193	0.99991	NS or Estimate < 0.5
MTFR1	lobule vs duct	0.378403	0.332854	0.920296	NS or Estimate < 0.5
SCAPER	lobule vs duct	-0.128081	0.703073	0.982081	NS or Estimate < 0.5
SLC13A2	lobule vs duct	-0.206098	0.530271	0.96181	NS or Estimate < 0.5
TJAP1	lobule vs duct	-0.209128	0.486025	0.953765	NS or Estimate < 0.5
GORAB	lobule vs duct	0.800359	0.0111925	0.626509	P < 0.05
GLRA1	lobule vs duct	0.410353	0.205899	0.886619	NS or Estimate < 0.5
HSDL1	lobule vs duct	-0.0138999	0.959377	0.997611	NS or Estimate < 0.5
CLDN14	lobule vs duct	-0.120073	0.733698	0.984474	NS or Estimate < 0.5
FAN1	lobule vs duct	-0.311357	0.378838	0.931432	NS or Estimate < 0.5
PTGR1	lobule vs duct	0.149039	0.572679	0.966953	NS or Estimate < 0.5
FAM25A	lobule vs duct	0.700737	0.00659676	0.608835	P < 0.05
TRIM77	lobule vs duct	-0.0690552	0.830524	0.987966	NS or Estimate < 0.5
ZNF407	lobule vs duct	-0.170622	0.636081	0.976256	NS or Estimate < 0.5
PIP4K2C	lobule vs duct	0.331497	0.322784	0.916726	NS or Estimate < 0.5
GPR85	lobule vs duct	0.0212785	0.959192	0.997611	NS or Estimate < 0.5
TCF7L2	lobule vs duct	-0.140952	0.664331	0.976256	NS or Estimate < 0.5
SRP54	lobule vs duct	-0.0127373	0.957554	0.997611	NS or Estimate < 0.5
P3H1	lobule vs duct	0.375763	0.27137	0.907759	NS or Estimate < 0.5
MYOCD	lobule vs duct	0.450826	0.154804	0.86699	NS or Estimate < 0.5
SPSB2	lobule vs duct	0.0883086	0.764865	0.986115	NS or Estimate < 0.5
GRAMD2B	lobule vs duct	-0.625541	0.0300625	0.743721	P < 0.05
TMEM88B	lobule vs duct	-0.151448	0.628987	0.976256	NS or Estimate < 0.5
KDM4C	lobule vs duct	0.209901	0.45212	0.949351	NS or Estimate < 0.5
RBM19	lobule vs duct	0.270292	0.400983	0.939436	NS or Estimate < 0.5
ANK3	lobule vs duct	-0.00549525	0.981826	0.999774	NS or Estimate < 0.5
ANPEP	lobule vs duct	0.778913	0.0218158	0.715791	P < 0.05
ANXA4	lobule vs duct	-0.0710873	0.792743	0.986989	NS or Estimate < 0.5
ANXA5	lobule vs duct	-0.0302299	0.900664	0.994961	NS or Estimate < 0.5
SEPTIN12	lobule vs duct	0.638643	0.0912421	0.835902	NS or Estimate < 0.5
ANXA6	lobule vs duct	0.0950086	0.733677	0.984474	NS or Estimate < 0.5
ANXA7	lobule vs duct	-0.155144	0.648565	0.976256	NS or Estimate < 0.5
ZNF716	lobule vs duct	-0.145283	0.689437	0.979054	NS or Estimate < 0.5
MTHFSD	lobule vs duct	-0.237991	0.417439	0.942481	NS or Estimate < 0.5
ZNF727	lobule vs duct	-0.00815633	0.978191	0.999465	NS or Estimate < 0.5
BIVM	lobule vs duct	-0.0336799	0.924433	0.994961	NS or Estimate < 0.5
SH3YL1	lobule vs duct	0.475548	0.0650654	0.796953	NS or Estimate < 0.5
MCTP2	lobule vs duct	0.483571	0.213989	0.892037	NS or Estimate < 0.5
SYNCRIP	lobule vs duct	-0.00573992	0.980514	0.999774	NS or Estimate < 0.5
BUD13	lobule vs duct	0.165858	0.633764	0.976256	NS or Estimate < 0.5
CANT1	lobule vs duct	0.177066	0.557648	0.963227	NS or Estimate < 0.5
EVI5L	lobule vs duct	0.16622	0.525997	0.961095	NS or Estimate < 0.5
EPS15	lobule vs duct	0.505631	0.109572	0.854338	NS or Estimate < 0.5
CLDN10	lobule vs duct	0.441123	0.262345	0.905491	NS or Estimate < 0.5
C15orf40	lobule vs duct	-0.112887	0.687917	0.978588	NS or Estimate < 0.5
MGAT4A	lobule vs duct	-0.152017	0.701107	0.9815	NS or Estimate < 0.5
SLC25A13	lobule vs duct	-0.651092	0.0306726	0.743721	P < 0.05
RNF170	lobule vs duct	0.018642	0.95106	0.997516	NS or Estimate < 0.5
SPG11	lobule vs duct	-0.44802	0.250779	0.90203	NS or Estimate < 0.5
SETD6	lobule vs duct	0.399865	0.258754	0.904302	NS or Estimate < 0.5
TRAPPC9	lobule vs duct	-0.123019	0.528658	0.961799	NS or Estimate < 0.5
POLR3B	lobule vs duct	-0.250512	0.47289	0.951304	NS or Estimate < 0.5
NPTN	lobule vs duct	-0.963071	0.00690679	0.608835	P < 0.05
CYB561A3	lobule vs duct	-0.138356	0.615378	0.976256	NS or Estimate < 0.5
JMJD4	lobule vs duct	0.23812	0.446102	0.947586	NS or Estimate < 0.5
PLEKHD1	lobule vs duct	0.839828	0.0168235	0.674985	P < 0.05
MAFF	lobule vs duct	-0.258208	0.469422	0.950909	NS or Estimate < 0.5
SAMD4A	lobule vs duct	0.672658	0.114389	0.854338	NS or Estimate < 0.5
DUS3L	lobule vs duct	0.301432	0.383625	0.931747	NS or Estimate < 0.5
KDM4E	lobule vs duct	0.595446	0.0413808	0.764353	P < 0.05
WWC1	lobule vs duct	0.0636919	0.869977	0.992144	NS or Estimate < 0.5
FXN	lobule vs duct	0.394325	0.211201	0.890656	NS or Estimate < 0.5
AHCY	lobule vs duct	-0.438773	0.182307	0.870539	NS or Estimate < 0.5
SPATA48	lobule vs duct	0.38938	0.214298	0.892037	NS or Estimate < 0.5
PDCD6IP	lobule vs duct	0.448735	0.139996	0.863244	NS or Estimate < 0.5
SH3D21	lobule vs duct	0.0751722	0.766156	0.986115	NS or Estimate < 0.5
KIAA0040	lobule vs duct	-0.457866	0.216717	0.893342	NS or Estimate < 0.5
PLXNB3	lobule vs duct	0.128308	0.676721	0.977911	NS or Estimate < 0.5
PCYT1B	lobule vs duct	-0.277865	0.492067	0.954392	NS or Estimate < 0.5
FBXL17	lobule vs duct	0.2691	0.322539	0.916726	NS or Estimate < 0.5
CCDC120	lobule vs duct	-0.195535	0.531168	0.96181	NS or Estimate < 0.5
RAB2B	lobule vs duct	0.237039	0.386163	0.933152	NS or Estimate < 0.5
FAM172A	lobule vs duct	-0.0882171	0.810177	0.987966	NS or Estimate < 0.5
ZNF580	lobule vs duct	-0.434307	0.117069	0.854338	NS or Estimate < 0.5
TWNK	lobule vs duct	0.415123	0.164222	0.86699	NS or Estimate < 0.5
VSIG10L	lobule vs duct	0.112407	0.703839	0.982447	NS or Estimate < 0.5
FAM170A	lobule vs duct	0.185044	0.63368	0.976256	NS or Estimate < 0.5
APBB1	lobule vs duct	-0.0354876	0.920008	0.994961	NS or Estimate < 0.5
PPP6R3	lobule vs duct	0.029332	0.926493	0.994961	NS or Estimate < 0.5
PLIN3	lobule vs duct	0.226766	0.535812	0.96181	NS or Estimate < 0.5
DDHD2	lobule vs duct	-0.244857	0.315612	0.916726	NS or Estimate < 0.5
ODR4	lobule vs duct	-0.402425	0.288646	0.913334	NS or Estimate < 0.5
PRR29	lobule vs duct	-0.43701	0.210212	0.890247	NS or Estimate < 0.5
TRAF3IP2	lobule vs duct	-0.241843	0.532373	0.96181	NS or Estimate < 0.5
FLNB	lobule vs duct	-0.0330348	0.90736	0.994961	NS or Estimate < 0.5
BRD8	lobule vs duct	-0.364216	0.330601	0.919296	NS or Estimate < 0.5
MRGPRG	lobule vs duct	0.52069	0.129123	0.858492	NS or Estimate < 0.5
FAM180B	lobule vs duct	-0.174289	0.622494	0.976256	NS or Estimate < 0.5
MTF2	lobule vs duct	0.0485059	0.858017	0.991877	NS or Estimate < 0.5
ARHGAP40	lobule vs duct	-0.0210745	0.930719	0.994961	NS or Estimate < 0.5
SHISAL2B	lobule vs duct	0.360974	0.315794	0.916726	NS or Estimate < 0.5
C5orf63	lobule vs duct	1.07053	8.29345e-05	0.283912	P < 0.05
CFAP44	lobule vs duct	-0.209524	0.527451	0.961095	NS or Estimate < 0.5
IYD	lobule vs duct	0.538602	0.0823372	0.820974	NS or Estimate < 0.5
ZNF605	lobule vs duct	0.665845	0.0483358	0.77139	P < 0.05
ARHGAP4	lobule vs duct	-0.196332	0.590903	0.971973	NS or Estimate < 0.5
NPAS3	lobule vs duct	0.151197	0.679817	0.977948	NS or Estimate < 0.5
ACIN1	lobule vs duct	-0.258122	0.446359	0.947615	NS or Estimate < 0.5
FXYD6	lobule vs duct	0.160264	0.652863	0.976256	NS or Estimate < 0.5
TMEM41B	lobule vs duct	-0.179801	0.585373	0.969923	NS or Estimate < 0.5
HERC6	lobule vs duct	0.310888	0.353431	0.926354	NS or Estimate < 0.5
LDHA	lobule vs duct	0.208055	0.170387	0.86699	NS or Estimate < 0.5
ZNF268	lobule vs duct	0.0865329	0.803565	0.987966	NS or Estimate < 0.5
MKS1	lobule vs duct	0.772725	0.0426012	0.77139	P < 0.05
DAG1	lobule vs duct	0.369168	0.246021	0.90203	NS or Estimate < 0.5
STARD3	lobule vs duct	-0.0299262	0.918806	0.994961	NS or Estimate < 0.5
HES7	lobule vs duct	0.170087	0.53681	0.96181	NS or Estimate < 0.5
PROM2	lobule vs duct	0.233867	0.455969	0.949883	NS or Estimate < 0.5
BIRC2	lobule vs duct	0.0480896	0.899615	0.994961	NS or Estimate < 0.5
EPB41	lobule vs duct	0.610431	0.0714351	0.806305	NS or Estimate < 0.5
NDUFS2	lobule vs duct	0.0886373	0.796139	0.987107	NS or Estimate < 0.5
HAUS4	lobule vs duct	0.12368	0.707984	0.982545	NS or Estimate < 0.5
ARHGAP25	lobule vs duct	-0.416379	0.256562	0.902908	NS or Estimate < 0.5
RGMA	lobule vs duct	-0.73913	0.0121206	0.626509	P < 0.05
SLC26A11	lobule vs duct	0.0937467	0.736892	0.985211	NS or Estimate < 0.5
SHMT2	lobule vs duct	-0.0852398	0.794898	0.987015	NS or Estimate < 0.5
MTUS1	lobule vs duct	-0.30539	0.408649	0.94078	NS or Estimate < 0.5
SMOC2	lobule vs duct	0.345823	0.35024	0.926289	NS or Estimate < 0.5
EHHADH	lobule vs duct	0.797647	0.0321928	0.746354	P < 0.05
MPP1	lobule vs duct	-0.69306	0.0332253	0.746354	P < 0.05
FAM122B	lobule vs duct	-0.329642	0.247278	0.90203	NS or Estimate < 0.5
AFF1	lobule vs duct	-0.688682	0.0619543	0.796953	NS or Estimate < 0.5
FAM104B	lobule vs duct	0.130305	0.562105	0.963909	NS or Estimate < 0.5
XIAP	lobule vs duct	0.297661	0.29057	0.913334	NS or Estimate < 0.5
CAAP1	lobule vs duct	0.748242	0.0360356	0.756511	P < 0.05
NEU4	lobule vs duct	-0.409348	0.244502	0.90203	NS or Estimate < 0.5
RAB35	lobule vs duct	0.618498	0.114276	0.854338	NS or Estimate < 0.5
DMAC2	lobule vs duct	-0.0177971	0.957155	0.997611	NS or Estimate < 0.5
CMSS1	lobule vs duct	0.0902489	0.787663	0.986712	NS or Estimate < 0.5
TNFAIP8L1	lobule vs duct	0.564109	0.0257672	0.72667	P < 0.05
TMEM178A	lobule vs duct	-0.662595	0.0445455	0.77139	P < 0.05
KCTD7	lobule vs duct	0.499514	0.183526	0.87104	NS or Estimate < 0.5
BIRC5	lobule vs duct	0.123597	0.547064	0.963227	NS or Estimate < 0.5
C3orf80	lobule vs duct	-0.375133	0.354374	0.9265	NS or Estimate < 0.5
TBC1D17	lobule vs duct	-0.000257584	0.999405	0.99991	NS or Estimate < 0.5
WWTR1	lobule vs duct	0.17117	0.591541	0.972332	NS or Estimate < 0.5
EDN1	lobule vs duct	-0.107299	0.788205	0.986712	NS or Estimate < 0.5
TESC	lobule vs duct	-0.0351009	0.906546	0.994961	NS or Estimate < 0.5
TTC39B	lobule vs duct	-0.336713	0.191877	0.876139	NS or Estimate < 0.5
KRTCAP3	lobule vs duct	-0.0868845	0.789297	0.986712	NS or Estimate < 0.5
CUL7	lobule vs duct	0.181671	0.620099	0.976256	NS or Estimate < 0.5
BEX2	lobule vs duct	-0.0976544	0.743681	0.986115	NS or Estimate < 0.5
PDZD3	lobule vs duct	-0.0965448	0.771788	0.986115	NS or Estimate < 0.5
IFT46	lobule vs duct	-0.255154	0.446403	0.947615	NS or Estimate < 0.5
SAP25	lobule vs duct	0.0146372	0.951299	0.997516	NS or Estimate < 0.5
AQP7	lobule vs duct	-0.305881	0.243053	0.901983	NS or Estimate < 0.5
TJP2	lobule vs duct	-0.242641	0.474044	0.951304	NS or Estimate < 0.5
DZIP1L	lobule vs duct	0.338127	0.317008	0.916726	NS or Estimate < 0.5
HHAT	lobule vs duct	-0.344936	0.204483	0.883452	NS or Estimate < 0.5
LAS1L	lobule vs duct	-0.259111	0.387282	0.934316	NS or Estimate < 0.5
MFSD5	lobule vs duct	-0.336194	0.263318	0.906283	NS or Estimate < 0.5
ZNF736	lobule vs duct	0.233525	0.509177	0.957212	NS or Estimate < 0.5
STRBP	lobule vs duct	0.327996	0.354241	0.92642	NS or Estimate < 0.5
PET100	lobule vs duct	-0.216661	0.542008	0.962549	NS or Estimate < 0.5
ZMYM3	lobule vs duct	0.0783622	0.786228	0.986712	NS or Estimate < 0.5
UBAP1	lobule vs duct	-0.19359	0.481763	0.953121	NS or Estimate < 0.5
ZEB2	lobule vs duct	0.2997	0.399524	0.939013	NS or Estimate < 0.5
C3orf52	lobule vs duct	-0.171279	0.600058	0.973708	NS or Estimate < 0.5
NUDT16	lobule vs duct	0.57451	0.105201	0.854338	NS or Estimate < 0.5
KXD1	lobule vs duct	-0.0400194	0.888316	0.99418	NS or Estimate < 0.5
AGA	lobule vs duct	-0.0944948	0.795518	0.987069	NS or Estimate < 0.5
TBP	lobule vs duct	-0.381213	0.22121	0.897302	NS or Estimate < 0.5
ZNF540	lobule vs duct	0.500042	0.0119825	0.626509	P < 0.05
MASTL	lobule vs duct	0.515796	0.129821	0.858492	NS or Estimate < 0.5
PLS3	lobule vs duct	-0.16715	0.614443	0.976256	NS or Estimate < 0.5
KCNJ13	lobule vs duct	-0.363361	0.235016	0.898455	NS or Estimate < 0.5
EFHC1	lobule vs duct	0.202078	0.562672	0.964317	NS or Estimate < 0.5
KLHL7	lobule vs duct	0.555899	0.150609	0.86699	NS or Estimate < 0.5
GOLGA3	lobule vs duct	0.700923	0.0163799	0.674985	P < 0.05
TECPR2	lobule vs duct	0.138663	0.646145	0.976256	NS or Estimate < 0.5
ZFP62	lobule vs duct	0.334319	0.365835	0.928448	NS or Estimate < 0.5
ZNF177	lobule vs duct	-0.205418	0.582413	0.969923	NS or Estimate < 0.5
ZFYVE28	lobule vs duct	0.00616833	0.98292	0.999774	NS or Estimate < 0.5
RAB40C	lobule vs duct	0.0395118	0.904653	0.994961	NS or Estimate < 0.5
TSFM	lobule vs duct	-0.0409778	0.881435	0.993234	NS or Estimate < 0.5
SLC38A6	lobule vs duct	-0.10853	0.746743	0.986115	NS or Estimate < 0.5
PGM1	lobule vs duct	-0.0629302	0.797598	0.987966	NS or Estimate < 0.5
YTHDF2	lobule vs duct	0.146051	0.628438	0.976256	NS or Estimate < 0.5
KIF21A	lobule vs duct	-0.465512	0.10829	0.854338	NS or Estimate < 0.5
SP7	lobule vs duct	0.0570334	0.870731	0.992144	NS or Estimate < 0.5
ARHGEF9	lobule vs duct	0.436482	0.228484	0.897302	NS or Estimate < 0.5
NEBL	lobule vs duct	-0.356747	0.379258	0.931591	NS or Estimate < 0.5
MAN2B1	lobule vs duct	0.317457	0.227049	0.897302	NS or Estimate < 0.5
MRRF	lobule vs duct	0.271722	0.343002	0.922551	NS or Estimate < 0.5
TXNRD3	lobule vs duct	0.347139	0.264459	0.906983	NS or Estimate < 0.5
DGCR2	lobule vs duct	-0.272128	0.370832	0.928448	NS or Estimate < 0.5
BRD7	lobule vs duct	-0.28541	0.337901	0.921005	NS or Estimate < 0.5
SPAM1	lobule vs duct	0.329743	0.442411	0.947091	NS or Estimate < 0.5
OSBPL10	lobule vs duct	0.0399423	0.903797	0.994961	NS or Estimate < 0.5
SERINC5	lobule vs duct	0.130616	0.714153	0.982545	NS or Estimate < 0.5
POLL	lobule vs duct	-0.364382	0.291605	0.913334	NS or Estimate < 0.5
LDHB	lobule vs duct	0.0409023	0.805681	0.987966	NS or Estimate < 0.5
PRR7	lobule vs duct	0.108814	0.721836	0.984474	NS or Estimate < 0.5
DMXL2	lobule vs duct	-0.21274	0.547631	0.963227	NS or Estimate < 0.5
GOLGA7	lobule vs duct	0.803321	0.0189641	0.690645	P < 0.05
RABEPK	lobule vs duct	0.187704	0.540385	0.96181	NS or Estimate < 0.5
ARHGDIB	lobule vs duct	0.90858	0.014555	0.672625	P < 0.05
ARL1	lobule vs duct	-0.378206	0.221512	0.897302	NS or Estimate < 0.5
SLC34A3	lobule vs duct	-0.882962	0.00548321	0.568814	P < 0.05
CPEB2	lobule vs duct	0.033487	0.924711	0.994961	NS or Estimate < 0.5
LGALS3	lobule vs duct	-0.378126	0.102563	0.851584	NS or Estimate < 0.5
MAMLD1	lobule vs duct	0.626352	0.0760073	0.814374	NS or Estimate < 0.5
PPP2R2A	lobule vs duct	-0.112003	0.756497	0.986115	NS or Estimate < 0.5
SUCLG2	lobule vs duct	0.300738	0.404954	0.939436	NS or Estimate < 0.5
CD33	lobule vs duct	1.13774	0.000587852	0.391759	P < 0.05
RIF1	lobule vs duct	-0.288642	0.422447	0.943641	NS or Estimate < 0.5
KLF11	lobule vs duct	-0.035535	0.924509	0.994961	NS or Estimate < 0.5
SRPRA	lobule vs duct	-0.0454888	0.883949	0.993234	NS or Estimate < 0.5
SYCP3	lobule vs duct	0.234969	0.485984	0.953765	NS or Estimate < 0.5
PHETA1	lobule vs duct	-0.305379	0.359616	0.928422	NS or Estimate < 0.5
BHMT2	lobule vs duct	-0.203754	0.489013	0.953765	NS or Estimate < 0.5
STX3	lobule vs duct	0.229622	0.35608	0.9268	NS or Estimate < 0.5
SYNJ2	lobule vs duct	0.373771	0.308083	0.916726	NS or Estimate < 0.5
ZNF182	lobule vs duct	0.0280524	0.92794	0.994961	NS or Estimate < 0.5
SCAMP5	lobule vs duct	-0.276138	0.353096	0.926354	NS or Estimate < 0.5
IGLL5	lobule vs duct	-1.02255	0.272041	0.907759	NS or Estimate < 0.5
SUFU	lobule vs duct	-0.0457363	0.893959	0.994961	NS or Estimate < 0.5
ASGR2	lobule vs duct	-0.332109	0.32634	0.91821	NS or Estimate < 0.5
ATP6AP1	lobule vs duct	-0.566491	0.10952	0.854338	NS or Estimate < 0.5
ATR	lobule vs duct	-0.273346	0.323817	0.917495	NS or Estimate < 0.5
GYG2	lobule vs duct	0.0155891	0.966665	0.998109	NS or Estimate < 0.5
HADH	lobule vs duct	0.265288	0.405151	0.939476	NS or Estimate < 0.5
SLAMF6	lobule vs duct	0.119527	0.686421	0.978588	NS or Estimate < 0.5
PIGT	lobule vs duct	0.115982	0.728534	0.984474	NS or Estimate < 0.5
CTTN	lobule vs duct	0.209494	0.439227	0.945405	NS or Estimate < 0.5
CLTA	lobule vs duct	0.0748925	0.683451	0.978588	NS or Estimate < 0.5
TMLHE	lobule vs duct	-0.259399	0.357108	0.927095	NS or Estimate < 0.5
PRMT7	lobule vs duct	0.50844	0.0933797	0.836102	NS or Estimate < 0.5
KLHDC4	lobule vs duct	0.369311	0.313311	0.916726	NS or Estimate < 0.5
PHF8	lobule vs duct	-0.172883	0.529293	0.96181	NS or Estimate < 0.5
CARD8	lobule vs duct	-0.0260215	0.934763	0.996171	NS or Estimate < 0.5
PACSIN2	lobule vs duct	-0.110986	0.724593	0.984474	NS or Estimate < 0.5
RNF17	lobule vs duct	0.183101	0.647666	0.976256	NS or Estimate < 0.5
MARF1	lobule vs duct	0.161114	0.568064	0.964993	NS or Estimate < 0.5
NDUFA2	lobule vs duct	-0.408722	0.17542	0.86699	NS or Estimate < 0.5
CLDN11	lobule vs duct	0.135494	0.700251	0.981302	NS or Estimate < 0.5
TUT7	lobule vs duct	0.228222	0.419877	0.943641	NS or Estimate < 0.5
ARHGDIA	lobule vs duct	0.0337379	0.906457	0.994961	NS or Estimate < 0.5
NIT1	lobule vs duct	0.0806107	0.795309	0.987069	NS or Estimate < 0.5
PLCXD2	lobule vs duct	0.276003	0.392945	0.936004	NS or Estimate < 0.5
CES3	lobule vs duct	0.324195	0.362355	0.928448	NS or Estimate < 0.5
BACH1	lobule vs duct	-0.711485	0.0051141	0.544945	P < 0.05
BAK1	lobule vs duct	-0.169352	0.656943	0.976256	NS or Estimate < 0.5
BCAT2	lobule vs duct	0.213298	0.586675	0.969923	NS or Estimate < 0.5
IFT80	lobule vs duct	-0.282749	0.369228	0.928448	NS or Estimate < 0.5
RPH3AL	lobule vs duct	-0.156969	0.609225	0.975229	NS or Estimate < 0.5
TAF6	lobule vs duct	0.43868	0.170934	0.86699	NS or Estimate < 0.5
ZNF674	lobule vs duct	-0.0426419	0.904458	0.994961	NS or Estimate < 0.5
MTRNR2L1	lobule vs duct	0.373504	0.209257	0.889616	NS or Estimate < 0.5
KRTAP9-1	lobule vs duct	-0.107413	0.715697	0.982848	NS or Estimate < 0.5
CTH	lobule vs duct	0.279247	0.427696	0.943641	NS or Estimate < 0.5
MTRNR2L5	lobule vs duct	-0.028567	0.929534	0.994961	NS or Estimate < 0.5
ALS2CL	lobule vs duct	0.194381	0.533722	0.96181	NS or Estimate < 0.5
RALGPS1	lobule vs duct	0.0346782	0.922647	0.994961	NS or Estimate < 0.5
DHX35	lobule vs duct	-0.239158	0.405155	0.939476	NS or Estimate < 0.5
PLEKHA5	lobule vs duct	0.339939	0.249671	0.90203	NS or Estimate < 0.5
HYI	lobule vs duct	-0.262942	0.303133	0.915639	NS or Estimate < 0.5
FAM193B	lobule vs duct	-0.520308	0.0753583	0.814374	NS or Estimate < 0.5
PIWIL1	lobule vs duct	-0.46372	0.125595	0.858492	NS or Estimate < 0.5
[truncated: 8,272 more rows]
