# Supplementary material for: Single nuclei chromatin accessibility and transcriptomic map of breast tissues of women of diverse genetic ancestry
Source: bioRxiv preprint, doi:10.1101/2023.10.04.560911, version 1 (2023-10-06)
Supplement: Table S18 [file 560911_file28.xlsx]

## Sheet: Sheet 1
Table S18: Gene expression differences in ductal epithelial cells between timepoints 1 and 2
Feature	Estimate	SE	tval	P	-log10_pval	Comparison	BH	sig_level
A2M	0.302297	0.415004	0.72842	0.506711	0.29524	1 vs 2	0.820455	NS or Estimate < 0.5
NAT2	1.44662	0.441867	3.27387	0.0306771	1.51319	1 vs 2	0.296992	P < 0.05
ACADM	1.6416	0.570297	2.87851	0.0450807	1.34601	1 vs 2	0.32852	P < 0.05
ACADS	-0.169382	0.492475	-0.343941	0.74821	0.125976	1 vs 2	0.921926	NS or Estimate < 0.5
ACAT1	1.55393	0.357201	4.35028	0.0121544	1.91527	1 vs 2	0.201007	P < 0.05
PSEN1	0.251629	0.876759	0.286999	0.788366	0.103272	1 vs 2	0.93959	NS or Estimate < 0.5
ADA	0.113283	0.694597	0.163092	0.878354	0.0563304	1 vs 2	0.962053	NS or Estimate < 0.5
SGCA	0.209786	0.461492	0.454581	0.672987	0.171993	1 vs 2	0.899871	NS or Estimate < 0.5
AGL	-0.189014	0.552519	-0.342094	0.749498	0.125229	1 vs 2	0.921926	NS or Estimate < 0.5
ABCD1	-0.0817042	0.942809	-0.0866604	0.935106	0.0291391	1 vs 2	0.977161	NS or Estimate < 0.5
ALDOB	-0.36437	0.636159	-0.572765	0.597462	0.22369	1 vs 2	0.868133	NS or Estimate < 0.5
AMPD1	-0.327359	0.68796	-0.475841	0.659011	0.181107	1 vs 2	0.890876	NS or Estimate < 0.5
APOC3	-0.276692	0.441867	-0.626188	0.565151	0.247836	1 vs 2	0.84674	NS or Estimate < 0.5
APOE	-1.50272	0.527543	-2.84852	0.0464653	1.33287	1 vs 2	0.330914	P < 0.05
ASL	-0.22005	0.631573	-0.348416	0.745093	0.12779	1 vs 2	0.921607	NS or Estimate < 0.5
ASS1	-0.471679	0.646118	-0.73002	0.505832	0.295993	1 vs 2	0.820455	NS or Estimate < 0.5
ATM	1.6416	0.360903	4.54861	0.0104286	1.98177	1 vs 2	0.18605	P < 0.05
AVPR2	-0.0817042	0.333333	-0.245112	0.818431	0.087018	1 vs 2	0.949535	NS or Estimate < 0.5
BTK	-0.327359	0.527543	-0.620536	0.568512	0.24526	1 vs 2	0.84927	NS or Estimate < 0.5
SERPING1	1.55393	0.566457	2.74324	0.0517328	1.28623	1 vs 2	0.340277	NS or Estimate < 0.5
C3	1.77238	0.125785	14.0905	0.000147231	3.832	1 vs 2	0.0232624	FDR < 0.05
CBS	1.03915	0.605108	1.7173	0.161058	0.793017	1 vs 2	0.557677	NS or Estimate < 0.5
CD36	-0.943358	0.659283	-1.43089	0.225707	0.646456	1 vs 2	0.636465	NS or Estimate < 0.5
CDK4	1.49728	0.413512	3.6209	0.0223394	1.65093	1 vs 2	0.257203	P < 0.05
CDKN1C	0.553926	0.373795	1.4819	0.212497	0.672647	1 vs 2	0.620148	NS or Estimate < 0.5
LYST	-0.553383	0.850628	-0.650559	0.550809	0.258999	1 vs 2	0.841121	NS or Estimate < 0.5
ERCC8	-0.0817042	0.471405	-0.173321	0.870817	0.0600733	1 vs 2	0.959864	NS or Estimate < 0.5
CLN3	-0.651869	0.76755	-0.849285	0.443564	0.353044	1 vs 2	0.784281	NS or Estimate < 0.5
COL1A1	-1.47168	0.782596	-1.88051	0.133203	0.875487	1 vs 2	0.510815	NS or Estimate < 0.5
COL1A2	0.275092	0.536268	0.512976	0.634999	0.197227	1 vs 2	0.884268	NS or Estimate < 0.5
COL5A1	-0.748371	0.333333	-2.24511	0.0881211	1.05492	1 vs 2	0.421296	NS or Estimate < 0.5
CPOX	-0.22005	0.624687	-0.352256	0.742422	0.129349	1 vs 2	0.920156	NS or Estimate < 0.5
CPT2	0.358939	0.39799	0.901878	0.418118	0.378701	1 vs 2	0.770426	NS or Estimate < 0.5
CST3	1.02561	0.640555	1.60112	0.184605	0.733756	1 vs 2	0.588781	NS or Estimate < 0.5
CSTB	2.23714	0.503077	4.44691	0.0112736	1.94794	1 vs 2	0.193289	P < 0.05
CYP2D6	0.503258	0.674899	0.745679	0.497296	0.303385	1 vs 2	0.818204	NS or Estimate < 0.5
DDB2	-0.489168	0.668643	-0.731584	0.504975	0.29673	1 vs 2	0.820455	NS or Estimate < 0.5
DLD	-0.969359	1.06605	-0.909296	0.414628	0.382342	1 vs 2	0.770426	NS or Estimate < 0.5
EMD	1.35894	0.527739	2.57502	0.0616508	1.21006	1 vs 2	0.363285	NS or Estimate < 0.5
EPB42	0.163951	0.539109	0.304115	0.776204	0.110024	1 vs 2	0.93554	NS or Estimate < 0.5
EPHX1	-0.415037	0.410208	-1.01177	0.368876	0.433119	1 vs 2	0.741711	NS or Estimate < 0.5
ERCC5	-0.202561	0.395677	-0.511935	0.635665	0.196772	1 vs 2	0.884268	NS or Estimate < 0.5
EXT1	-1.47168	0.570297	-2.58055	0.0612918	1.2126	1 vs 2	0.363285	NS or Estimate < 0.5
F5	-0.169382	0.492475	-0.343941	0.74821	0.125976	1 vs 2	0.921926	NS or Estimate < 0.5
FABP2	-0.276692	0.823075	-0.336168	0.753639	0.122837	1 vs 2	0.923722	NS or Estimate < 0.5
FANCA	0.308271	0.441867	0.697655	0.523819	0.280819	1 vs 2	0.825319	NS or Estimate < 0.5
FAH	-0.489168	0.987626	-0.495297	0.646365	0.189522	1 vs 2	0.884268	NS or Estimate < 0.5
FECH	0.887259	0.601618	1.47479	0.214291	0.668997	1 vs 2	0.622917	NS or Estimate < 0.5
FGFR2	0.251629	0.877927	0.286617	0.788638	0.103122	1 vs 2	0.93959	NS or Estimate < 0.5
FH	-0.0817042	0.702318	-0.116335	0.912994	0.0395322	1 vs 2	0.969142	NS or Estimate < 0.5
FUCA1	-0.943358	0.602709	-1.5652	0.19259	0.715366	1 vs 2	0.595037	NS or Estimate < 0.5
FUT1	-0.748371	0.666667	-1.12256	0.32445	0.488852	1 vs 2	0.704759	NS or Estimate < 0.5
FUT6	1.02561	0.675248	1.51886	0.203418	0.691611	1 vs 2	0.611169	NS or Estimate < 0.5
GALC	0.446617	0.823075	0.54262	0.61621	0.210271	1 vs 2	0.875396	NS or Estimate < 0.5
GALT	-0.169382	0.873878	-0.193828	0.855756	0.0676503	1 vs 2	0.956739	NS or Estimate < 0.5
GBE1	-0.415037	0.57735	-0.718866	0.511979	0.290748	1 vs 2	0.820455	NS or Estimate < 0.5
GCDH	-0.22005	0.546134	-0.402923	0.707611	0.150205	1 vs 2	0.918096	NS or Estimate < 0.5
GJA1	-0.748371	0.971539	-0.770294	0.484097	0.315068	1 vs 2	0.811834	NS or Estimate < 0.5
GK	0.113283	0.834621	0.13573	0.898591	0.0464379	1 vs 2	0.965833	NS or Estimate < 0.5
GLI3	-0.748371	0.666667	-1.12256	0.32445	0.488852	1 vs 2	0.704759	NS or Estimate < 0.5
GP9	-0.717334	0.592958	-1.20976	0.292978	0.533166	1 vs 2	0.688188	NS or Estimate < 0.5
GPI	-0.0817042	0.932625	-0.0876067	0.9344	0.0294673	1 vs 2	0.976921	NS or Estimate < 0.5
GSN	2.14557	0.741295	2.89435	0.0443685	1.35293	1 vs 2	0.328501	P < 0.05
MSH6	-0.415037	0.275754	-1.5051	0.20675	0.684554	1 vs 2	0.613818	NS or Estimate < 0.5
GUSB	-0.307728	0.552519	-0.556955	0.607249	0.216633	1 vs 2	0.872444	NS or Estimate < 0.5
HADHA	0.543119	0.452495	1.20028	0.296255	0.528334	1 vs 2	0.69133	NS or Estimate < 0.5
HADHB	1.79958	0.444936	4.04459	0.015545	1.80841	1 vs 2	0.22341	P < 0.05
HBG2	0.584963	0.57735	1.01318	0.368278	0.433825	1 vs 2	0.741711	NS or Estimate < 0.5
HGD	-0.415037	0.745356	-0.556831	0.607326	0.216578	1 vs 2	0.872444	NS or Estimate < 0.5
HK1	0.220593	0.592958	0.372021	0.728748	0.137423	1 vs 2	0.918424	NS or Estimate < 0.5
HK2	-0.22005	0.948512	-0.231995	0.827928	0.0820077	1 vs 2	0.95132	NS or Estimate < 0.5
HPRT1	0.887259	0.380108	2.33423	0.0798811	1.09756	1 vs 2	0.413914	NS or Estimate < 0.5
HPS1	-0.169382	0.816263	-0.20751	0.845748	0.0727588	1 vs 2	0.955342	NS or Estimate < 0.5
HSD11B2	0.113283	0.386175	0.293347	0.783847	0.105769	1 vs 2	0.937326	NS or Estimate < 0.5
HSD3B2	0.723308	0.624687	1.15787	0.311343	0.506761	1 vs 2	0.704576	NS or Estimate < 0.5
SGSH	0.0566417	0.646118	0.0876646	0.934357	0.0294873	1 vs 2	0.976921	NS or Estimate < 0.5
IDS	-0.0250625	0.419959	-0.0596784	0.955274	0.0198719	1 vs 2	0.987011	NS or Estimate < 0.5
IDUA	0.446617	0.814506	0.548328	0.612632	0.2128	1 vs 2	0.874824	NS or Estimate < 0.5
INSR	0.729282	0.434258	1.67937	0.168378	0.773714	1 vs 2	0.572306	NS or Estimate < 0.5
PDX1	0.0566417	0.386175	0.146674	0.890485	0.0503733	1 vs 2	0.963485	NS or Estimate < 0.5
ITGA6	0.389975	0.609388	0.639946	0.557023	0.254127	1 vs 2	0.843751	NS or Estimate < 0.5
JAG1	-0.327359	0.700127	-0.467571	0.664428	0.177552	1 vs 2	0.895613	NS or Estimate < 0.5
JAK3	0.187414	0.299384	0.625999	0.565263	0.24775	1 vs 2	0.84674	NS or Estimate < 0.5
KRT12	-0.307728	0.552519	-0.556955	0.607249	0.216633	1 vs 2	0.872444	NS or Estimate < 0.5
KRT18	0.536901	0.323854	1.65785	0.172688	0.762739	1 vs 2	0.575862	NS or Estimate < 0.5
LAMA3	1.22059	0.197375	6.18413	0.00347443	2.45912	1 vs 2	0.113638	P < 0.05
LAMB3	0.830618	0.475018	1.7486	0.15527	0.808913	1 vs 2	0.546477	NS or Estimate < 0.5
SGCB	-0.553383	0.823075	-0.672337	0.538209	0.269049	1 vs 2	0.832315	NS or Estimate < 0.5
LIPA	0.446617	0.919491	0.485722	0.652571	0.185372	1 vs 2	0.8872	NS or Estimate < 0.5
MLH1	-1.52235	0.672427	-2.26396	0.0863019	1.06398	1 vs 2	0.421296	NS or Estimate < 0.5
MTM1	-0.415037	0.471405	-0.880427	0.428348	0.368203	1 vs 2	0.770426	NS or Estimate < 0.5
MTR	1.6416	0.0566417	28.9823	8.43689e-06	5.07382	1 vs 2	0.00393849	FDR < 0.05
MMUT	0.446617	0.563155	0.793062	0.472128	0.32594	1 vs 2	0.80105	NS or Estimate < 0.5
PTCH1	-2.13835	0.462739	-4.62107	0.00987319	2.00554	1 vs 2	0.182042	P < 0.05
NCF1	-1.0817	0.49523	-2.18425	0.0942961	1.02551	1 vs 2	0.430218	NS or Estimate < 0.5
NDP	-0.22005	0.892702	-0.246499	0.817429	0.0875497	1 vs 2	0.949535	NS or Estimate < 0.5
NF1	0.510832	0.332332	1.53711	0.19908	0.700972	1 vs 2	0.604089	NS or Estimate < 0.5
PNP	0.887259	0.601618	1.47479	0.214291	0.668997	1 vs 2	0.622917	NS or Estimate < 0.5
NPC1	0.00597397	0.638978	0.00934925	0.992988	0.00305592	1 vs 2	0.995259	NS or Estimate < 0.5
OAT	0.578478	0.671306	0.86172	0.437436	0.359085	1 vs 2	0.778591	NS or Estimate < 0.5
PAX6	1.04907	0.659465	1.59079	0.186867	0.728468	1 vs 2	0.588781	NS or Estimate < 0.5
PCBD1	1.17387	0.552544	2.12448	0.100833	0.996399	1 vs 2	0.441372	NS or Estimate < 0.5
PDHA1	0.358939	0.649036	0.553033	0.609692	0.214889	1 vs 2	0.872932	NS or Estimate < 0.5
PEPD	-0.994026	0.97842	-1.01595	0.367107	0.435207	1 vs 2	0.741711	NS or Estimate < 0.5
PEX12	-0.610025	0.631573	-0.965882	0.3888	0.410274	1 vs 2	0.75087	NS or Estimate < 0.5
PEX6	-0.748371	0.546134	-1.37031	0.242463	0.615354	1 vs 2	0.64548	NS or Estimate < 0.5
PEX7	0.446617	0.684421	0.652546	0.549651	0.259913	1 vs 2	0.841121	NS or Estimate < 0.5
PFKM	-0.155835	0.618132	-0.252106	0.813383	0.0897049	1 vs 2	0.949535	NS or Estimate < 0.5
PGK1	0.399891	0.63322	0.631519	0.561992	0.25027	1 vs 2	0.845912	NS or Estimate < 0.5
PHKA2	0.520747	0.428411	1.21553	0.290996	0.536112	1 vs 2	0.687127	NS or Estimate < 0.5
PHKB	0.113283	0.995944	0.113745	0.914921	0.0386166	1 vs 2	0.970385	NS or Estimate < 0.5
PHKG2	0.446617	0.138346	3.22826	0.0320283	1.49447	1 vs 2	0.298214	NS or Estimate < 0.5
SERPINA1	0.220593	1.11083	0.198584	0.852273	0.0694211	1 vs 2	0.955342	NS or Estimate < 0.5
PKD2	-0.0817042	0.660763	-0.123651	0.907556	0.0421266	1 vs 2	0.968035	NS or Estimate < 0.5
PKP1	1.16993	0.471405	2.48179	0.0680807	1.16698	1 vs 2	0.383503	NS or Estimate < 0.5
PLA2G2A	-0.479253	0.688519	-0.696062	0.524716	0.280076	1 vs 2	0.826001	NS or Estimate < 0.5
PLOD1	0.0283454	0.825419	0.0343406	0.974251	0.0113292	1 vs 2	0.989644	NS or Estimate < 0.5
PMM2	-0.85568	0.440643	-1.94189	0.124107	0.906202	1 vs 2	0.492878	NS or Estimate < 0.5
PMP22	1.46625	0.313635	4.67502	0.00948279	2.02306	1 vs 2	0.178041	P < 0.05
PON2	0.584963	0.654411	0.893876	0.42191	0.37478	1 vs 2	0.770426	NS or Estimate < 0.5
POU3F4	-1.55338	0.386175	-4.02248	0.0158318	1.80047	1 vs 2	0.22341	P < 0.05
PRNP	1.29243	0.388096	3.33018	0.0291008	1.53609	1 vs 2	0.29387	P < 0.05
PROC	-1.0817	0.471405	-2.29464	0.0834296	1.07868	1 vs 2	0.418974	NS or Estimate < 0.5
PROS1	-0.200419	0.672427	-0.298053	0.780503	0.107625	1 vs 2	0.937078	NS or Estimate < 0.5
PTH	0.0566417	0.646118	0.0876646	0.934357	0.0294873	1 vs 2	0.976921	NS or Estimate < 0.5
PTH1R	-1.35082	1.0879	-1.24167	0.282191	0.549457	1 vs 2	0.679596	NS or Estimate < 0.5
PTS	-1.27669	0.462739	-2.75899	0.0509023	1.29326	1 vs 2	0.338038	NS or Estimate < 0.5
QDPR	-0.327359	0.610347	-0.53635	0.620156	0.207499	1 vs 2	0.875396	NS or Estimate < 0.5
RB1	-0.112741	0.779487	-0.144634	0.891994	0.0496379	1 vs 2	0.963485	NS or Estimate < 0.5
PITX2	-0.415037	0.654411	-0.634215	0.560399	0.251503	1 vs 2	0.844009	NS or Estimate < 0.5
RS1	0.77995	0.194988	4	0.0161301	1.79236	1 vs 2	0.22341	P < 0.05
ATXN1	1.11328	0.694597	1.60278	0.184246	0.734603	1 vs 2	0.588781	NS or Estimate < 0.5
SGCD	-0.0250625	0.570297	-0.0439464	0.967053	0.0145495	1 vs 2	0.989644	NS or Estimate < 0.5
SLC2A2	-0.553383	0.624687	-0.885857	0.425739	0.370856	1 vs 2	0.770426	NS or Estimate < 0.5
SLC3A1	-2.21248	0.411195	-5.3806	0.00576631	2.2391	1 vs 2	0.146222	P < 0.05
SLC5A1	0.113283	0.602709	0.187957	0.86006	0.0654711	1 vs 2	0.957042	NS or Estimate < 0.5
SMN1	-1.71733	0.757647	-2.26667	0.0860437	1.06528	1 vs 2	0.421296	NS or Estimate < 0.5
SNCA	0.584963	0.745356	0.78481	0.47644	0.321992	1 vs 2	0.806102	NS or Estimate < 0.5
TCOF1	0.477653	0.799131	0.597716	0.582223	0.23491	1 vs 2	0.85702	NS or Estimate < 0.5
TIMP3	1.62806	0.405337	4.01655	0.0159098	1.79833	1 vs 2	0.22341	P < 0.05
TPI1	0.553926	0.886396	0.624919	0.565904	0.247257	1 vs 2	0.847083	NS or Estimate < 0.5
TPM1	0.457932	0.56855	0.805439	0.465719	0.331876	1 vs 2	0.799767	NS or Estimate < 0.5
TPMT	-0.22005	0.441867	-0.498	0.644619	0.190697	1 vs 2	0.884268	NS or Estimate < 0.5
TSC1	0.113283	0.528321	0.214421	0.840706	0.0753559	1 vs 2	0.955342	NS or Estimate < 0.5
UROS	-0.169382	0.87207	-0.19423	0.855461	0.0677997	1 vs 2	0.956727	NS or Estimate < 0.5
XDH	-1.18901	0.800667	-1.48503	0.211713	0.674253	1 vs 2	0.620148	NS or Estimate < 0.5
XPA	1.16993	0.410208	2.85203	0.0463008	1.33441	1 vs 2	0.330914	P < 0.05
AIRE	-0.748371	0.333333	-2.24511	0.0881211	1.05492	1 vs 2	0.421296	NS or Estimate < 0.5
APOB	-1.61002	0.723487	-2.22537	0.0900733	1.0454	1 vs 2	0.422978	NS or Estimate < 0.5
BLMH	-0.307728	0.552519	-0.556955	0.607249	0.216633	1 vs 2	0.872444	NS or Estimate < 0.5
TPP1	-0.145919	0.733424	-0.198956	0.852001	0.06956	1 vs 2	0.955342	NS or Estimate < 0.5
COL5A2	-0.502716	0.610347	-0.823656	0.45641	0.340645	1 vs 2	0.794649	NS or Estimate < 0.5
CTSK	0.446617	0.739906	0.603613	0.578659	0.237577	1 vs 2	0.855977	NS or Estimate < 0.5
CYBB	-0.415037	0.301664	-1.37583	0.240887	0.618187	1 vs 2	0.64548	NS or Estimate < 0.5
CYB5R3	2.23894	0.322449	6.94354	0.00225965	2.64596	1 vs 2	0.0924565	P < 0.05
ERCC2	-0.886717	0.782596	-1.13305	0.320505	0.494165	1 vs 2	0.704759	NS or Estimate < 0.5
G6PD	-1.35082	1.09487	-1.23377	0.284826	0.54542	1 vs 2	0.683609	NS or Estimate < 0.5
GM2A	0.867628	0.402001	2.15828	0.0970765	1.01289	1 vs 2	0.434969	NS or Estimate < 0.5
HLCS	0.692272	0.886279	0.781099	0.478388	0.320219	1 vs 2	0.807005	NS or Estimate < 0.5
HSD17B4	0.748914	0.492685	1.52007	0.203128	0.692231	1 vs 2	0.611169	NS or Estimate < 0.5
IFNGR1	0.630797	0.455833	1.38383	0.238617	0.622298	1 vs 2	0.64548	NS or Estimate < 0.5
IL2RA	0.163951	0.309274	0.530115	0.624094	0.20475	1 vs 2	0.875593	NS or Estimate < 0.5
KRT17	2.71573	0.403512	6.73025	0.00253901	2.59533	1 vs 2	0.0980289	P < 0.05
LTBP2	0.446617	0.471993	0.946236	0.397608	0.400545	1 vs 2	0.75524	NS or Estimate < 0.5
PAFAH1B1	-0.448216	1.06964	-0.419034	0.696715	0.156945	1 vs 2	0.912225	NS or Estimate < 0.5
MVK	0.446617	0.386175	1.15651	0.311838	0.50607	1 vs 2	0.704576	NS or Estimate < 0.5
NOTCH3	0.187414	0.619962	0.302299	0.777491	0.109305	1 vs 2	0.93554	NS or Estimate < 0.5
PAFAH2	0.446617	0.471993	0.946236	0.397608	0.400545	1 vs 2	0.75524	NS or Estimate < 0.5
PLEC	1.18741	0.477469	2.48689	0.0677093	1.16935	1 vs 2	0.382667	NS or Estimate < 0.5
PSEN2	0.692272	0.480002	1.44223	0.2227	0.65228	1 vs 2	0.636273	NS or Estimate < 0.5
SLC10A2	0.113283	0.502143	0.2256	0.83257	0.079579	1 vs 2	0.95235	NS or Estimate < 0.5
SLC5A5	-0.610025	0.995944	-0.612509	0.57331	0.24161	1 vs 2	0.853442	NS or Estimate < 0.5
AK1	-0.327359	0.42135	-0.77693	0.480585	0.31823	1 vs 2	0.808718	NS or Estimate < 0.5
ALPL	0.294724	1.04974	0.280758	0.792819	0.100826	1 vs 2	0.941523	NS or Estimate < 0.5
AMH	0.308271	0.593694	0.519242	0.630999	0.199971	1 vs 2	0.882042	NS or Estimate < 0.5
AMPD3	-0.415037	0.275754	-1.5051	0.20675	0.684554	1 vs 2	0.613818	NS or Estimate < 0.5
APP	1.6596	0.397693	4.17307	0.0139964	1.85398	1 vs 2	0.217224	P < 0.05
APRT	1.02561	0.569757	1.80007	0.146226	0.834976	1 vs 2	0.535427	NS or Estimate < 0.5
AQP2	-2.0817	0.502143	-4.14564	0.0143108	1.84434	1 vs 2	0.218059	P < 0.05
ARSA	-0.513523	0.827075	-0.62089	0.568302	0.245421	1 vs 2	0.84927	NS or Estimate < 0.5
ATRX	-5.00626	0.557512	-8.97964	0.000851209	3.06996	1 vs 2	0.057952	P < 0.05
C1QB	0.50994	0.554983	0.918839	0.410173	0.387033	1 vs 2	0.76847	NS or Estimate < 0.5
COL4A5	-0.276692	0.386175	-0.716493	0.513294	0.289634	1 vs 2	0.820455	NS or Estimate < 0.5
F12	0.113283	0.290061	0.39055	0.716037	0.145064	1 vs 2	0.918424	NS or Estimate < 0.5
FUT2	-0.886717	0.290061	-3.057	0.037769	1.42286	1 vs 2	0.314928	P < 0.05
HEXA	-0.0817042	0.349508	-0.233769	0.826641	0.0826831	1 vs 2	0.951003	NS or Estimate < 0.5
HEXB	1.05664	0.386175	2.73617	0.0521105	1.28307	1 vs 2	0.341093	NS or Estimate < 0.5
KCNJ11	-0.610025	0.702318	-0.868589	0.434081	0.362429	1 vs 2	0.775712	NS or Estimate < 0.5
KRT14	2.98929	1.01912	2.93321	0.0426771	1.36981	1 vs 2	0.32804	P < 0.05
LDLR	-1.16938	0.608713	-1.92107	0.127115	0.895805	1 vs 2	0.500477	NS or Estimate < 0.5
PMS1	0.553926	0.761817	0.727112	0.50743	0.294624	1 vs 2	0.820455	NS or Estimate < 0.5
TSC2	0.339307	0.75201	0.4512	0.675225	0.170552	1 vs 2	0.900358	NS or Estimate < 0.5
VHL	-0.85568	0.876895	-0.975806	0.384414	0.415201	1 vs 2	0.749702	NS or Estimate < 0.5
VWF	-0.276692	0.654411	-0.42281	0.694174	0.158532	1 vs 2	0.910029	NS or Estimate < 0.5
WRN	0.446617	0.441867	1.01075	0.369311	0.432608	1 vs 2	0.741711	NS or Estimate < 0.5
DCX	0.251629	0.502143	0.501111	0.642614	0.19205	1 vs 2	0.884268	NS or Estimate < 0.5
FCGR1A	-0.276692	0.389615	-0.710167	0.516811	0.286668	1 vs 2	0.82154	NS or Estimate < 0.5
FCGR3A	-0.00757336	0.94287	-0.00803224	0.993976	0.00262415	1 vs 2	0.995259	NS or Estimate < 0.5
CR1	-0.553383	0.624687	-0.885857	0.425739	0.370856	1 vs 2	0.770426	NS or Estimate < 0.5
CD55	0.178749	0.397294	0.449917	0.676075	0.170005	1 vs 2	0.90044	NS or Estimate < 0.5
SLC11A1	0.251629	0.510393	0.49301	0.647844	0.188529	1 vs 2	0.884268	NS or Estimate < 0.5
GPX1	1.06656	0.755291	1.41211	0.230772	0.636818	1 vs 2	0.640203	NS or Estimate < 0.5
C7	0.723308	0.441867	1.63694	0.176985	0.752063	1 vs 2	0.579788	NS or Estimate < 0.5
CD14	1.55393	0.809885	1.9187	0.127462	0.894619	1 vs 2	0.500477	NS or Estimate < 0.5
IGFBP2	-2.0703	0.942809	-2.19588	0.093079	1.03115	1 vs 2	0.425421	NS or Estimate < 0.5
ORM2	0.527925	0.432216	1.22144	0.288985	0.539125	1 vs 2	0.686149	NS or Estimate < 0.5
CD59	0.958634	0.355397	2.69736	0.0542425	1.26566	1 vs 2	0.347112	NS or Estimate < 0.5
HPX	-0.748371	0.881917	-0.848573	0.443917	0.352698	1 vs 2	0.784281	NS or Estimate < 0.5
CD4	0.0566417	0.694597	0.0815461	0.938925	0.0273691	1 vs 2	0.978464	NS or Estimate < 0.5
SLC11A2	-0.516656	0.743329	-0.695057	0.525283	0.279607	1 vs 2	0.826495	NS or Estimate < 0.5
IGF1	1.08225	0.0876781	12.3434	0.000247539	3.60636	1 vs 2	0.0338963	FDR < 0.05
SERPINA5	-1.85568	0.440643	-4.2113	0.013572	1.86736	1 vs 2	0.213876	P < 0.05
NOS2	-1.0817	0.883441	-1.22442	0.287974	0.540647	1 vs 2	0.684772	NS or Estimate < 0.5
IFNAR1	0.553926	0.490396	1.12955	0.321815	0.492394	1 vs 2	0.704759	NS or Estimate < 0.5
RFX2	-3.22779	0.673568	-4.79209	0.00869829	2.06057	1 vs 2	0.17048	P < 0.05
SOD2	-0.323849	0.675456	-0.479453	0.656652	0.182664	1 vs 2	0.890861	NS or Estimate < 0.5
GSR	-0.276692	0.386175	-0.716493	0.513294	0.289634	1 vs 2	0.820455	NS or Estimate < 0.5
IL13RA2	1.16993	1.43329e-16	8162504193114882	1.35163e-63	62.8691	1 vs 2	6.94062e-60	FDR < 0.001
TGFB1	-0.748371	0.942809	-0.793767	0.471761	0.326278	1 vs 2	0.80105	NS or Estimate < 0.5
RPL9	1.92514	0.256484	7.5059	0.00168586	2.77318	1 vs 2	0.0809054	P < 0.05
ACY1	-0.0310365	0.413512	-0.0750558	0.943774	0.0251319	1 vs 2	0.981035	NS or Estimate < 0.5
ADH5	0.477653	0.771332	0.619258	0.569275	0.244678	1 vs 2	0.850022	NS or Estimate < 0.5
ADH7	-1.61002	0.609388	-2.64204	0.0574579	1.24065	1 vs 2	0.356447	NS or Estimate < 0.5
ADORA2B	-0.415037	0.275754	-1.5051	0.20675	0.684554	1 vs 2	0.613818	NS or Estimate < 0.5
ADRA1D	-0.522347	0.552519	-0.945392	0.39799	0.400128	1 vs 2	0.75524	NS or Estimate < 0.5
ADRB1	-3.45813	0.150099	-23.039	2.10311e-05	4.67714	1 vs 2	0.00841304	FDR < 0.05
AGTR2	0.918296	0.666667	1.37744	0.240426	0.619018	1 vs 2	0.64548	NS or Estimate < 0.5
ALDH2	0.0391525	0.421859	0.0928095	0.930518	0.0312755	1 vs 2	0.976237	NS or Estimate < 0.5
ALDH1B1	-0.0817042	0.349508	-0.233769	0.826641	0.0826831	1 vs 2	0.951003	NS or Estimate < 0.5
ALDH1A3	0.553926	0.523902	1.05731	0.349996	0.455936	1 vs 2	0.731028	NS or Estimate < 0.5
ALDH3B2	-5.12008	0.623639	-8.21	0.0011995	2.921	1 vs 2	0.0665884	P < 0.05
ALDH9A1	0.956788	0.306767	3.11894	0.0355631	1.449	1 vs 2	0.307694	P < 0.05
ALOX12	-1.80501	0.441867	-4.08497	0.015037	1.82284	1 vs 2	0.221299	P < 0.05
ALOX5	0.220593	0.470972	0.468378	0.663898	0.177898	1 vs 2	0.895134	NS or Estimate < 0.5
ANXA1	2.10059	0.494181	4.25066	0.0131512	1.88104	1 vs 2	0.211399	P < 0.05
ATP1A1	1.44662	0.806521	1.79365	0.147323	0.831729	1 vs 2	0.536909	NS or Estimate < 0.5
ATP4A	-0.358396	0.570297	-0.628438	0.563816	0.248863	1 vs 2	0.84674	NS or Estimate < 0.5
AVPR1B	-0.748371	0.78138	-0.957756	0.392423	0.406246	1 vs 2	0.754009	NS or Estimate < 0.5
BCKDHA	0.0256052	0.750513	0.0341169	0.974418	0.0112545	1 vs 2	0.989644	NS or Estimate < 0.5
BLVRA	-1.21248	0.411195	-2.94867	0.042025	1.37649	1 vs 2	0.326671	P < 0.05
TSPO	-0.276692	0.654411	-0.42281	0.694174	0.158532	1 vs 2	0.910029	NS or Estimate < 0.5
CACNA2D1	0.308271	0.739906	0.416635	0.698332	0.155938	1 vs 2	0.912741	NS or Estimate < 0.5
CACNB3	0.723308	0.823075	0.878788	0.429138	0.367403	1 vs 2	0.771172	NS or Estimate < 0.5
CACNB4	-1.22005	0.546134	-2.23398	0.0892163	1.04956	1 vs 2	0.422381	NS or Estimate < 0.5
CALCB	-0.415037	0.942809	-0.440214	0.682525	0.165882	1 vs 2	0.902248	NS or Estimate < 0.5
CHRM3	0.389975	0.609388	0.639946	0.557023	0.254127	1 vs 2	0.843751	NS or Estimate < 0.5
CHRNA3	-0.415037	0.602709	-0.68862	0.528922	0.276608	1 vs 2	0.826495	NS or Estimate < 0.5
CHRNB1	-0.974395	0.776428	-1.25497	0.277809	0.556253	1 vs 2	0.676545	NS or Estimate < 0.5
CHRNB4	0.220593	0.659106	0.334685	0.754677	0.122239	1 vs 2	0.924554	NS or Estimate < 0.5
CYP2C8	-1.18901	0.898237	-1.32372	0.25618	0.591455	1 vs 2	0.656392	NS or Estimate < 0.5
CYP2C18	-0.748371	0.471405	-1.58753	0.187584	0.726804	1 vs 2	0.588781	NS or Estimate < 0.5
CYP2E1	-0.307728	0.519141	-0.592764	0.585227	0.232676	1 vs 2	0.858734	NS or Estimate < 0.5
CYP2F1	-1.41504	0.471405	-3.00175	0.0398732	1.39932	1 vs 2	0.320672	P < 0.05
CYP27B1	-0.660693	0.87207	-0.757614	0.490863	0.30904	1 vs 2	0.815068	NS or Estimate < 0.5
DCK	0.77995	0.654301	1.19203	0.299133	0.524135	1 vs 2	0.69285	NS or Estimate < 0.5
DDC	-0.85568	0.842704	-1.0154	0.367341	0.434931	1 vs 2	0.741711	NS or Estimate < 0.5
DIO1	-1.27669	0.462739	-2.75899	0.0509023	1.29326	1 vs 2	0.338038	NS or Estimate < 0.5
DRD4	-1.53984	0.689362	-2.23371	0.0892424	1.04943	1 vs 2	0.422381	NS or Estimate < 0.5
DRD5	-0.327359	0.610347	-0.53635	0.620156	0.207499	1 vs 2	0.875396	NS or Estimate < 0.5
GABRA1	0.251629	0.502143	0.501111	0.642614	0.19205	1 vs 2	0.884268	NS or Estimate < 0.5
GABRB1	0.113283	0.502143	0.2256	0.83257	0.079579	1 vs 2	0.95235	NS or Estimate < 0.5
GAD1	0.308271	0.739906	0.416635	0.698332	0.155938	1 vs 2	0.912741	NS or Estimate < 0.5
GART	1.02561	0.78138	1.31256	0.259577	0.585733	1 vs 2	0.662325	NS or Estimate < 0.5
GAS6	-0.276692	0.739906	-0.373955	0.727415	0.138217	1 vs 2	0.918424	NS or Estimate < 0.5
GGCX	0.446617	0.938506	0.47588	0.658985	0.181125	1 vs 2	0.890876	NS or Estimate < 0.5
GRIA4	-0.415037	0.562843	-0.737395	0.501799	0.299471	1 vs 2	0.820455	NS or Estimate < 0.5
GRIK3	-1.18901	0.675248	-1.76085	0.153064	0.815127	1 vs 2	0.542994	NS or Estimate < 0.5
GRIN2A	-0.943358	0.646118	-1.46004	0.218059	0.661425	1 vs 2	0.62783	NS or Estimate < 0.5
GRIN2B	-2.05067	0.692531	-2.96112	0.0415083	1.38187	1 vs 2	0.325522	P < 0.05
GRINA	1.27126	0.309274	4.11046	0.0147266	1.8319	1 vs 2	0.219164	P < 0.05
GRM4	-0.169382	0.335778	-0.504447	0.640467	0.193503	1 vs 2	0.884268	NS or Estimate < 0.5
GRM6	0.77995	0.482828	1.61538	0.181532	0.741047	1 vs 2	0.583698	NS or Estimate < 0.5
GSTA2	0.113283	0.602709	0.187957	0.86006	0.0654711	1 vs 2	0.957042	NS or Estimate < 0.5
GSTM2	0.0566417	0.239081	0.236914	0.824362	0.0838821	1 vs 2	0.951003	NS or Estimate < 0.5
GSTM3	-0.717334	0.387386	-1.85173	0.137713	0.861024	1 vs 2	0.519969	NS or Estimate < 0.5
GSTM4	0.251629	0.803943	0.312994	0.769926	0.113551	1 vs 2	0.933005	NS or Estimate < 0.5
GSTT2	-0.327359	0.771332	-0.424408	0.6931	0.159204	1 vs 2	0.910029	NS or Estimate < 0.5
GUK1	1.82304	0.398425	4.57563	0.0102172	1.99067	1 vs 2	0.185717	P < 0.05
HMGCR	-0.836049	0.654969	-1.27647	0.270862	0.567251	1 vs 2	0.669978	NS or Estimate < 0.5
HRH1	-0.22005	1.02806	-0.214045	0.840981	0.075214	1 vs 2	0.955342	NS or Estimate < 0.5
HSD3B1	-1.52235	0.823518	-1.84859	0.138215	0.859444	1 vs 2	0.521098	NS or Estimate < 0.5
HTR1B	-1.0817	0.546134	-1.98066	0.118712	0.925504	1 vs 2	0.483252	NS or Estimate < 0.5
HTR2C	-0.276692	0.828134	-0.334115	0.755076	0.122009	1 vs 2	0.924712	NS or Estimate < 0.5
ICAM2	0.0566417	0.386175	0.146674	0.890485	0.0503733	1 vs 2	0.963485	NS or Estimate < 0.5
IGF1R	0.446617	0.444244	1.00534	0.371615	0.429907	1 vs 2	0.741711	NS or Estimate < 0.5
IGF2R	1.41558	0.87207	1.62324	0.17986	0.745066	1 vs 2	0.581153	NS or Estimate < 0.5
IL2RB	-0.748371	0.942809	-0.793767	0.471761	0.326278	1 vs 2	0.80105	NS or Estimate < 0.5
IL7	-2.13835	0.386175	-5.53724	0.00519985	2.28401	1 vs 2	0.139432	P < 0.05
IMPDH1	0.607334	0.376147	1.61462	0.181694	0.74066	1 vs 2	0.584036	NS or Estimate < 0.5
IMPDH2	2.58138	0.560867	4.60248	0.0100122	1.99947	1 vs 2	0.183616	P < 0.05
ITGA4	-0.169382	0.686511	-0.246729	0.817263	0.0876381	1 vs 2	0.949535	NS or Estimate < 0.5
ITGAX	-1.66069	0.509537	-3.25922	0.0311037	1.50719	1 vs 2	0.296992	P < 0.05
ITGB6	0.358939	0.723991	0.495777	0.646055	0.189731	1 vs 2	0.884268	NS or Estimate < 0.5
KLKB1	-1.71733	0.685021	-2.50698	0.0662707	1.17868	1 vs 2	0.379164	NS or Estimate < 0.5
CYP4F3	-0.415037	0.57735	-0.718866	0.511979	0.290748	1 vs 2	0.820455	NS or Estimate < 0.5
MAOB	0.251629	0.624894	0.402675	0.70778	0.150102	1 vs 2	0.918096	NS or Estimate < 0.5
NQO2	-0.00757336	0.59781	-0.0126685	0.990499	0.00414598	1 vs 2	0.995259	NS or Estimate < 0.5
NPY	0.251629	0.471405	0.533786	0.621773	0.206368	1 vs 2	0.875396	NS or Estimate < 0.5
OXT	-0.138346	0.823075	-0.168084	0.874673	0.0581541	1 vs 2	0.962035	NS or Estimate < 0.5
OXTR	-0.169382	0.676912	-0.250228	0.814738	0.0889822	1 vs 2	0.949535	NS or Estimate < 0.5
P4HA1	-0.0128872	1.16927	-0.0110216	0.991734	0.00360478	1 vs 2	0.995259	NS or Estimate < 0.5
P4HB	1.65152	0.558924	2.95482	0.0417687	1.37915	1 vs 2	0.326671	P < 0.05
PAM	-0.610025	0.441867	-1.38056	0.239542	0.620619	1 vs 2	0.64548	NS or Estimate < 0.5
PC	-0.522347	0.674252	-0.774706	0.48176	0.31717	1 vs 2	0.809369	NS or Estimate < 0.5
PDE4C	-2.82464	0.668086	-4.22796	0.0133919	1.87316	1 vs 2	0.213232	P < 0.05
PDHB	0.251629	0.321364	0.783003	0.477388	0.321129	1 vs 2	0.806173	NS or Estimate < 0.5
PGR	-0.415037	0.275754	-1.5051	0.20675	0.684554	1 vs 2	0.613818	NS or Estimate < 0.5
ABCB1	0.113283	0.570297	0.198639	0.852233	0.0694419	1 vs 2	0.955342	NS or Estimate < 0.5
PLA2G1B	-0.85568	0.519141	-1.64826	0.174644	0.757846	1 vs 2	0.575862	NS or Estimate < 0.5
PLA2G5	0.358939	0.39799	0.901878	0.418118	0.378701	1 vs 2	0.770426	NS or Estimate < 0.5
PLAT	0.974938	0.389975	2.5	0.0667665	1.17544	1 vs 2	0.379885	NS or Estimate < 0.5
POLR2A	0.251629	0.806521	0.311993	0.770632	0.113153	1 vs 2	0.933005	NS or Estimate < 0.5
POLR2B	-0.0817042	0.765167	-0.10678	0.920105	0.0361626	1 vs 2	0.971944	NS or Estimate < 0.5
POR	0.251629	0.958548	0.262511	0.805893	0.0937225	1 vs 2	0.949535	NS or Estimate < 0.5
PPIB	-0.748371	0.779301	-0.96031	0.391281	0.407512	1 vs 2	0.753366	NS or Estimate < 0.5
PPIC	0.251629	0.666667	0.377444	0.725016	0.139652	1 vs 2	0.918424	NS or Estimate < 0.5
PPP3R1	1.34056	0.473788	2.82945	0.0473717	1.32448	1 vs 2	0.330914	P < 0.05
PRRG1	-1.27669	0.441867	-2.88931	0.0445937	1.35073	1 vs 2	0.328501	P < 0.05
PTGDR	-0.0250625	0.570297	-0.0439464	0.967053	0.0145495	1 vs 2	0.989644	NS or Estimate < 0.5
PTGDS	-1	0.471405	-2.12132	0.101192	0.994856	1 vs 2	0.441372	NS or Estimate < 0.5
PTGER2	0.446617	0.624687	0.714945	0.514153	0.288908	1 vs 2	0.820455	NS or Estimate < 0.5
PTGER3	-0.415037	0.654411	-0.634215	0.560399	0.251503	1 vs 2	0.844009	NS or Estimate < 0.5
PTGS2	-0.522347	0.552519	-0.945392	0.39799	0.400128	1 vs 2	0.75524	NS or Estimate < 0.5
RARB	0.584963	0.968346	0.604084	0.578375	0.23779	1 vs 2	0.855977	NS or Estimate < 0.5
RPL4	3.03525	0.386189	7.85949	0.00141611	2.8489	1 vs 2	0.0730828	P < 0.05
RPL5	1.50386	0.256192	5.87005	0.00420635	2.37609	1 vs 2	0.122725	P < 0.05
RPL6	3.2452	0.250574	12.9511	0.000205051	3.68814	1 vs 2	0.030084	FDR < 0.05
RPL7	1.39037	0.139641	9.95671	0.000571522	3.24297	1 vs 2	0.0524015	P < 0.05
RPL7A	1.56906	0.198103	7.92043	0.00137517	2.86164	1 vs 2	0.0722417	P < 0.05
RPL12	1.38883	0.267032	5.20098	0.00651177	2.1863	1 vs 2	0.152389	P < 0.05
RPL23	0.843109	0.645876	1.30537	0.261787	0.582052	1 vs 2	0.664825	NS or Estimate < 0.5
RPL18A	1.49144	0.379688	3.92806	0.017131	1.76622	1 vs 2	0.231341	P < 0.05
RPL19	2.47654	0.279382	8.86434	0.000894517	3.04841	1 vs 2	0.0600437	P < 0.05
RPL21	1.52846	0.10457	14.6166	0.000127447	3.89467	1 vs 2	0.0221845	FDR < 0.05
RPL17	2.68901	0.304474	8.83166	0.000907286	3.04226	1 vs 2	0.0603277	P < 0.05
RPL24	1.32861	0.27139	4.89559	0.00806952	2.09315	1 vs 2	0.164958	P < 0.05
RPL26	1.52004	0.307957	4.93589	0.00783975	2.1057	1 vs 2	0.162734	P < 0.05
RPL27	0.0296683	0.14327	0.20708	0.846062	0.0725979	1 vs 2	0.955342	NS or Estimate < 0.5
RPL30	1.81886	0.230152	7.90283	0.00138684	2.85797	1 vs 2	0.0722989	P < 0.05
RPL28	1.20402	0.0498621	24.147	1.74481e-05	4.75825	1 vs 2	0.00779097	FDR < 0.05
RPL29	2.2	0.315708	6.96848	0.00222952	2.65179	1 vs 2	0.0915885	P < 0.05
RPL34	2.13893	0.155478	13.7571	0.000161768	3.79111	1 vs 2	0.0251721	FDR < 0.05
RPL35A	0.508797	0.341454	1.49009	0.21045	0.676851	1 vs 2	0.617874	NS or Estimate < 0.5
RPL37	1.10095	0.241871	4.55182	0.0104032	1.98283	1 vs 2	0.18605	P < 0.05
RPL37A	1.50888	0.253775	5.94576	0.00401383	2.39644	1 vs 2	0.120558	P < 0.05
RPL39	1.98196	0.409804	4.83637	0.00842222	2.07457	1 vs 2	0.167714	P < 0.05
RPL36AL	0.372486	0.43505	0.856191	0.440152	0.356397	1 vs 2	0.780584	NS or Estimate < 0.5
SLC2A9	-1.05067	0.817339	-1.28547	0.268004	0.571859	1 vs 2	0.669978	NS or Estimate < 0.5
CLDN20	-0.0817042	0.593769	-0.137603	0.897203	0.0471092	1 vs 2	0.964846	NS or Estimate < 0.5
CD44	0.628057	0.746999	0.840773	0.447798	0.348918	1 vs 2	0.788823	NS or Estimate < 0.5
TSR3	-0.331191	0.308331	-1.07414	0.343237	0.464406	1 vs 2	0.726429	NS or Estimate < 0.5
NCCRP1	0.187414	0.619962	0.302299	0.777491	0.109305	1 vs 2	0.93554	NS or Estimate < 0.5
STX16	-0.22005	0.570297	-0.385852	0.71925	0.14312	1 vs 2	0.918424	NS or Estimate < 0.5
UBE2W	0.389975	1.06566	0.365947	0.732937	0.134933	1 vs 2	0.920156	NS or Estimate < 0.5
NDUFV3	1.83659	0.602924	3.04614	0.038172	1.41825	1 vs 2	0.315139	P < 0.05
RORC	0.77995	0.928393	0.840108	0.44813	0.348596	1 vs 2	0.788875	NS or Estimate < 0.5
TM6SF2	-1.18901	0.552519	-2.15199	0.0977634	1.00982	1 vs 2	0.434969	NS or Estimate < 0.5
GRB10	-1.0817	0.510393	-2.11935	0.101416	0.993894	1 vs 2	0.441372	NS or Estimate < 0.5
GDF6	-0.36437	0.85515	-0.426089	0.691971	0.159912	1 vs 2	0.910029	NS or Estimate < 0.5
GGA1	-1.27669	0.624687	-2.04373	0.110474	0.956739	1 vs 2	0.463848	NS or Estimate < 0.5
ALKBH2	-0.307728	0.587238	-0.524026	0.627955	0.202071	1 vs 2	0.878546	NS or Estimate < 0.5
OR2Y1	-1.71733	0.592958	-2.89622	0.0442857	1.35374	1 vs 2	0.328501	P < 0.05
OR2A14	1.43307	0.736789	1.94502	0.123662	0.907764	1 vs 2	0.492878	NS or Estimate < 0.5
ETFRF1	1.04907	0.642544	1.63268	0.177873	0.749889	1 vs 2	0.581153	NS or Estimate < 0.5
ZNF425	-1.18901	0.675248	-1.76085	0.153064	0.815127	1 vs 2	0.542994	NS or Estimate < 0.5
SPOPL	0.77995	0.609388	1.27989	0.269773	0.569002	1 vs 2	0.669978	NS or Estimate < 0.5
ZNF470	-0.0991933	0.352156	-0.281675	0.792165	0.101184	1 vs 2	0.941286	NS or Estimate < 0.5
ARHGEF37	-0.994026	0.654969	-1.51767	0.203703	0.691002	1 vs 2	0.611169	NS or Estimate < 0.5
MED11	0.251629	0.666667	0.377444	0.725016	0.139652	1 vs 2	0.918424	NS or Estimate < 0.5
C4orf3	0.992427	0.580597	1.70932	0.16257	0.78896	1 vs 2	0.561397	NS or Estimate < 0.5
ATP1B1	-0.226367	0.345417	-0.655345	0.548023	0.261202	1 vs 2	0.839402	NS or Estimate < 0.5
TOMM5	-1.56084	0.696544	-2.24083	0.08854	1.05286	1 vs 2	0.421349	NS or Estimate < 0.5
DENND6B	-0.22005	0.948512	-0.231995	0.827928	0.0820077	1 vs 2	0.95132	NS or Estimate < 0.5
C8orf82	-0.0250625	0.441867	-0.0567195	0.957489	0.0188663	1 vs 2	0.987386	NS or Estimate < 0.5
OR2T27	-1.384	0.75751	-1.82704	0.141714	0.848588	1 vs 2	0.526937	NS or Estimate < 0.5
OR2T35	-0.307728	0.985872	-0.312138	0.77053	0.113211	1 vs 2	0.933005	NS or Estimate < 0.5
STX19	-0.586562	0.851704	-0.688692	0.528881	0.276642	1 vs 2	0.826495	NS or Estimate < 0.5
PIM3	0.479795	0.669066	0.717112	0.51295	0.289925	1 vs 2	0.820455	NS or Estimate < 0.5
TTC3	1.46625	0.277387	5.28592	0.00614542	2.21145	1 vs 2	0.149857	P < 0.05
OR4C15	-1.384	0.687791	-2.01224	0.114506	0.941172	1 vs 2	0.474183	NS or Estimate < 0.5
PPARA	-1.47168	0.449281	-3.27563	0.0306263	1.5139	1 vs 2	0.296992	P < 0.05
AFAP1L2	-1.13835	0.138346	-8.22826	0.00118938	2.92468	1 vs 2	0.0663855	P < 0.05
ATP5F1A	0.497284	1.07557	0.462346	0.667863	0.175312	1 vs 2	0.898828	NS or Estimate < 0.5
OR4C13	-0.415037	0.410208	-1.01177	0.368876	0.433119	1 vs 2	0.741711	NS or Estimate < 0.5
PLEKHA1	-0.489168	0.3286	-1.48865	0.21081	0.67611	1 vs 2	0.618576	NS or Estimate < 0.5
PAMR1	-0.132372	0.721952	-0.183353	0.86344	0.0637678	1 vs 2	0.959138	NS or Estimate < 0.5
EXOSC10	-1.55338	0.441867	-3.5155	0.0245496	1.60996	1 vs 2	0.270431	P < 0.05
RPLP0	0.210907	0.133738	1.57702	0.189925	0.721419	1 vs 2	0.591535	NS or Estimate < 0.5
GMPR2	-0.799039	0.413512	-1.93232	0.12548	0.901427	1 vs 2	0.49636	NS or Estimate < 0.5
HCFC1R1	1.58496	0.471405	3.36221	0.0282468	1.54903	1 vs 2	0.289157	P < 0.05
PFKL	1.00812	0.694929	1.45067	0.220487	0.656617	1 vs 2	0.633576	NS or Estimate < 0.5
ATP5MC1	-1.80501	0.710137	-2.54178	0.06386	1.19477	1 vs 2	0.370951	NS or Estimate < 0.5
C4B	-1.25323	0.656992	-1.90753	0.129114	0.889028	1 vs 2	0.504181	NS or Estimate < 0.5
ECHDC1	0.723308	1.01291	0.714092	0.514627	0.288508	1 vs 2	0.820455	NS or Estimate < 0.5
ATP5MC2	-1.31705	0.143934	-9.15036	0.000791747	3.10141	1 vs 2	0.0550675	P < 0.05
DEFB108B	0.308271	0.739906	0.416635	0.698332	0.155938	1 vs 2	0.912741	NS or Estimate < 0.5
ASTL	-0.415037	0.777407	-0.533874	0.621717	0.206407	1 vs 2	0.875396	NS or Estimate < 0.5
AFTPH	1.46625	0.519141	2.82437	0.0476162	1.32225	1 vs 2	0.330914	P < 0.05
SUMO4	1.46625	0.535547	2.73785	0.0520204	1.28383	1 vs 2	0.341093	NS or Estimate < 0.5
LCLAT1	-1.27669	0.462739	-2.75899	0.0509023	1.29326	1 vs 2	0.338038	NS or Estimate < 0.5
ATP5MC3	-0.145919	0.859704	-0.169732	0.873459	0.0587573	1 vs 2	0.961152	NS or Estimate < 0.5
EPSTI1	-0.85568	0.698852	-1.22441	0.287978	0.540641	1 vs 2	0.684772	NS or Estimate < 0.5
EXOSC3	0.0490683	0.730037	0.0672134	0.949637	0.0224422	1 vs 2	0.983837	NS or Estimate < 0.5
GATA3	0.715735	0.657072	1.08928	0.33726	0.472036	1 vs 2	0.718601	NS or Estimate < 0.5
SFR1	-1.1248	1.19804	-0.938869	0.400954	0.396905	1 vs 2	0.75821	NS or Estimate < 0.5
ZNF787	-0.169382	0.661452	-0.256076	0.810522	0.0912351	1 vs 2	0.949535	NS or Estimate < 0.5
ANXA2	1.1186	0.554593	2.01697	0.113891	0.943512	1 vs 2	0.472207	NS or Estimate < 0.5
THOC5	1.01343	0.942448	1.07532	0.34277	0.464997	1 vs 2	0.726274	NS or Estimate < 0.5
CBY1	-0.651869	0.834842	-0.780829	0.47853	0.320091	1 vs 2	0.807005	NS or Estimate < 0.5
OR8G1	-0.132372	0.433453	-0.305389	0.775302	0.110529	1 vs 2	0.93554	NS or Estimate < 0.5
PTRH1	-0.748371	0.666667	-1.12256	0.32445	0.488852	1 vs 2	0.704759	NS or Estimate < 0.5
KCTD11	0.315844	0.585596	0.539355	0.618263	0.208827	1 vs 2	0.875396	NS or Estimate < 0.5
ALKAL2	-0.340907	0.873302	-0.390365	0.716164	0.144988	1 vs 2	0.918424	NS or Estimate < 0.5
TWISTNB	0.0566417	0.694597	0.0815461	0.938925	0.0273691	1 vs 2	0.978464	NS or Estimate < 0.5
RPLP1	0.445598	0.288946	1.54215	0.197899	0.703556	1 vs 2	0.60381	NS or Estimate < 0.5
BICD1	-0.45353	0.63672	-0.712291	0.515628	0.287663	1 vs 2	0.821008	NS or Estimate < 0.5
SMAD2	1.32388	0.792702	1.67008	0.170225	0.768977	1 vs 2	0.575826	NS or Estimate < 0.5
LDLRAD4	1.01343	0.741888	1.36601	0.243696	0.613152	1 vs 2	0.645645	NS or Estimate < 0.5
HMGXB4	1.08225	0.710486	1.52325	0.202366	0.693863	1 vs 2	0.610491	NS or Estimate < 0.5
UQCR10	-1.27669	0.386175	-3.30599	0.0297659	1.52628	1 vs 2	0.296217	P < 0.05
BRPF1	-0.748371	0.563155	-1.32889	0.25462	0.594107	1 vs 2	0.653574	NS or Estimate < 0.5
ARHGEF35	1.00597	0.443189	2.26985	0.0857415	1.06681	1 vs 2	0.421296	NS or Estimate < 0.5
ATP5PF	0.650428	0.84897	0.766138	0.486306	0.31309	1 vs 2	0.81426	NS or Estimate < 0.5
MTFP1	-0.415037	0.944235	-0.439549	0.682967	0.1656	1 vs 2	0.902248	NS or Estimate < 0.5
GLE1	0.0566417	0.282309	0.200637	0.850771	0.0701874	1 vs 2	0.955342	NS or Estimate < 0.5
ERLIN2	-0.0582411	0.694391	-0.0838735	0.937187	0.0281738	1 vs 2	0.977843	NS or Estimate < 0.5
RBMS3	-0.22005	0.546134	-0.402923	0.707611	0.150205	1 vs 2	0.918096	NS or Estimate < 0.5
GTF2IRD2B	0.282666	0.592958	0.476704	0.658447	0.181479	1 vs 2	0.890876	NS or Estimate < 0.5
SMARCD3	-0.502716	0.68796	-0.730734	0.505441	0.29633	1 vs 2	0.820455	NS or Estimate < 0.5
DMAC2L	-0.358396	0.570297	-0.628438	0.563816	0.248863	1 vs 2	0.84674	NS or Estimate < 0.5
SP5	-0.748371	0.919491	-0.813897	0.461379	0.335943	1 vs 2	0.797703	NS or Estimate < 0.5
MED15	0.738106	0.513769	1.43665	0.224173	0.649416	1 vs 2	0.636284	NS or Estimate < 0.5
MANBAL	0.766403	1.03056	0.743679	0.49838	0.302439	1 vs 2	0.819594	NS or Estimate < 0.5
TXNDC8	-0.610025	0.609388	-1.00105	0.373452	0.427765	1 vs 2	0.741711	NS or Estimate < 0.5
BMF	0.146462	0.530028	0.276329	0.795986	0.0990948	1 vs 2	0.942914	NS or Estimate < 0.5
RPLP2	0.407056	0.325075	1.25219	0.278721	0.554831	1 vs 2	0.676545	NS or Estimate < 0.5
NOMO3	-0.465705	0.901757	-0.516442	0.632784	0.198744	1 vs 2	0.882975	NS or Estimate < 0.5
GRK6	0.692272	0.587238	1.17886	0.303788	0.51743	1 vs 2	0.698395	NS or Estimate < 0.5
OR10AD1	0.177498	0.59781	0.296914	0.781312	0.107176	1 vs 2	0.937326	NS or Estimate < 0.5
OR52M1	-1.0817	1.05537	-1.02495	0.363321	0.43971	1 vs 2	0.741711	NS or Estimate < 0.5
ZNF740	-0.415037	0.654411	-0.634215	0.560399	0.251503	1 vs 2	0.844009	NS or Estimate < 0.5
RTP2	0.497284	0.503075	0.98849	0.378871	0.421509	1 vs 2	0.745403	NS or Estimate < 0.5
TMEM220	0.113283	0.68087	0.16638	0.875929	0.057531	1 vs 2	0.962053	NS or Estimate < 0.5
VHLL	-1.27669	0.624687	-2.04373	0.110474	0.956739	1 vs 2	0.463848	NS or Estimate < 0.5
ZNF705A	-0.448216	0.71675	-0.625345	0.565651	0.247452	1 vs 2	0.846951	NS or Estimate < 0.5
RNASEK	-0.358396	0.386175	-0.928066	0.405905	0.391576	1 vs 2	0.762933	NS or Estimate < 0.5
ETV3L	0.308271	0.694597	0.443813	0.680129	0.167409	1 vs 2	0.902248	NS or Estimate < 0.5
TRIM67	-1.61002	0.68087	-2.36466	0.0772694	1.11199	1 vs 2	0.405184	NS or Estimate < 0.5
SPDYE3	0.030919	0.213781	0.14463	0.891998	0.0496361	1 vs 2	0.963485	NS or Estimate < 0.5
METRNL	-2.23485	0.726609	-3.07572	0.0370857	1.43079	1 vs 2	0.312701	P < 0.05
LINGO4	-0.145919	0.89855	-0.162394	0.878869	0.0560758	1 vs 2	0.962053	NS or Estimate < 0.5
OR1B1	-2.0817	1.20297	-1.73047	0.158595	0.79971	1 vs 2	0.552875	NS or Estimate < 0.5
OR1J1	-1.41504	0.57735	-2.45092	0.0703758	1.15258	1 vs 2	0.387215	NS or Estimate < 0.5
OR1J4	0.0256052	0.519141	0.0493223	0.963027	0.0163615	1 vs 2	0.989029	NS or Estimate < 0.5
OR1L8	-0.415037	0.57735	-0.718866	0.511979	0.290748	1 vs 2	0.820455	NS or Estimate < 0.5
OR1N2	-0.943358	0.747158	-1.26259	0.275327	0.560152	1 vs 2	0.675168	NS or Estimate < 0.5
OR10J5	-1.18901	0.743902	-1.59835	0.185209	0.732337	1 vs 2	0.588781	NS or Estimate < 0.5
OR10R2	0.358939	0.750513	0.478258	0.657432	0.182149	1 vs 2	0.890876	NS or Estimate < 0.5
OR10T2	-0.276692	0.903215	-0.306341	0.774628	0.110907	1 vs 2	0.93554	NS or Estimate < 0.5
OR13C8	-0.610025	0.609388	-1.00105	0.373452	0.427765	1 vs 2	0.741711	NS or Estimate < 0.5
OR2B11	0.251629	0.745356	0.337596	0.75264	0.123412	1 vs 2	0.923722	NS or Estimate < 0.5
OR2M2	0.187414	0.77647	0.241367	0.821139	0.0855834	1 vs 2	0.951003	NS or Estimate < 0.5
OR2T12	-0.22005	0.923883	-0.23818	0.823446	0.0843651	1 vs 2	0.951003	NS or Estimate < 0.5
OR4C3	-0.202561	0.976729	-0.207387	0.845838	0.0727129	1 vs 2	0.955342	NS or Estimate < 0.5
OR4C46	-0.307728	0.519141	-0.592764	0.585227	0.232676	1 vs 2	0.858734	NS or Estimate < 0.5
OR4D2	-1.0817	0.881917	-1.22654	0.287258	0.541727	1 vs 2	0.684772	NS or Estimate < 0.5
OR4D6	-0.22005	0.441867	-0.498	0.644619	0.190697	1 vs 2	0.884268	NS or Estimate < 0.5
OR4D9	0.503258	0.471405	1.06757	0.345861	0.461098	1 vs 2	0.726429	NS or Estimate < 0.5
OR4M2	-0.0817042	0.333333	-0.245112	0.818431	0.087018	1 vs 2	0.949535	NS or Estimate < 0.5
NCK2	0.534295	0.517263	1.03293	0.359997	0.443702	1 vs 2	0.741711	NS or Estimate < 0.5
OR4N5	-0.415037	0.747158	-0.555488	0.608162	0.21598	1 vs 2	0.872444	NS or Estimate < 0.5
OR5A1	-1.27669	0.462739	-2.75899	0.0509023	1.29326	1 vs 2	0.338038	NS or Estimate < 0.5
OR5L1	0.830618	0.501999	1.65462	0.173344	0.76109	1 vs 2	0.575862	NS or Estimate < 0.5
OR5T1	-0.886717	0.823075	-1.07732	0.341974	0.466007	1 vs 2	0.724957	NS or Estimate < 0.5
OR51A2	-0.415037	8.62956e-17	-4809486694493455	1.12139e-62	61.9502	1 vs 2	7.19792e-60	NS or Estimate < 0.5
OR51D1	0.358939	0.350181	1.02501	0.363297	0.439738	1 vs 2	0.741711	NS or Estimate < 0.5
OR51L1	1.11328	0.290061	3.8381	0.0184895	1.73307	1 vs 2	0.239153	P < 0.05
OR51S1	0.251629	0.333333	0.754888	0.492327	0.307747	1 vs 2	0.815068	NS or Estimate < 0.5
RPS3	1.25126	0.250057	5.00392	0.00746972	2.1267	1 vs 2	0.158286	P < 0.05
SFMBT1	0.584963	0.602709	0.970555	0.386729	0.412593	1 vs 2	0.75087	NS or Estimate < 0.5
OR52E2	-0.943358	0.646118	-1.46004	0.218059	0.661425	1 vs 2	0.62783	NS or Estimate < 0.5
OR52E4	0.251629	0.666667	0.377444	0.725016	0.139652	1 vs 2	0.918424	NS or Estimate < 0.5
OR52E8	-0.553383	1.02806	-0.538281	0.618939	0.208352	1 vs 2	0.875396	NS or Estimate < 0.5
OR52I2	-0.415037	0.654411	-0.634215	0.560399	0.251503	1 vs 2	0.844009	NS or Estimate < 0.5
OR52L1	-0.805012	0.570297	-1.41157	0.230921	0.636537	1 vs 2	0.640203	NS or Estimate < 0.5
OR56A4	-0.943358	0.386175	-2.44283	0.0709919	1.14879	1 vs 2	0.387215	NS or Estimate < 0.5
OR7A10	-0.610025	0.441867	-1.38056	0.239542	0.620619	1 vs 2	0.64548	NS or Estimate < 0.5
OR8K3	-0.748371	0.333333	-2.24511	0.0881211	1.05492	1 vs 2	0.421296	NS or Estimate < 0.5
OR8J1	0.389975	0.948512	0.411144	0.70204	0.153638	1 vs 2	0.915666	NS or Estimate < 0.5
TMEM198	0.641604	0.290061	2.21196	0.0914261	1.03893	1 vs 2	0.423476	NS or Estimate < 0.5
OR9Q1	-1.01749	0.602452	-1.68891	0.166505	0.778573	1 vs 2	0.569055	NS or Estimate < 0.5
FRG2	1.02561	0.726291	1.41211	0.230772	0.636816	1 vs 2	0.640203	NS or Estimate < 0.5
OR9K2	0.810986	0.552519	1.4678	0.216068	0.665409	1 vs 2	0.625605	NS or Estimate < 0.5
OR4C12	-0.415037	0.834621	-0.497277	0.645087	0.190382	1 vs 2	0.884268	NS or Estimate < 0.5
CHD3	1.35894	0.470972	2.88539	0.0447697	1.34902	1 vs 2	0.328501	P < 0.05
OR6B1	-1.0817	0.502143	-2.15418	0.0975236	1.01089	1 vs 2	0.434969	NS or Estimate < 0.5
OR9Q2	1.3824	0.786588	1.75746	0.153671	0.813408	1 vs 2	0.544667	NS or Estimate < 0.5
OR9G4	-0.415037	0.530116	-0.782919	0.477432	0.321089	1 vs 2	0.806173	NS or Estimate < 0.5
SREBF1	1.64692	0.508203	3.24067	0.0316538	1.49957	1 vs 2	0.297696	P < 0.05
HNRNPL	1.00323	0.727745	1.37855	0.240112	0.619586	1 vs 2	0.64548	NS or Estimate < 0.5
RGS10	-0.22005	0.609388	-0.3611	0.736289	0.132952	1 vs 2	0.920156	NS or Estimate < 0.5
AK4	0.540379	0.407249	1.3269	0.255219	0.593087	1 vs 2	0.654621	NS or Estimate < 0.5
KDM2B	0.0566417	0.782596	0.0723767	0.945777	0.0242114	1 vs 2	0.981421	NS or Estimate < 0.5
ZNF32	-0.886717	0.528321	-1.67837	0.168577	0.773201	1 vs 2	0.572306	NS or Estimate < 0.5
ACTR2	-0.189014	0.723991	-0.261072	0.806928	0.0931653	1 vs 2	0.949535	NS or Estimate < 0.5
NFASC	-0.610025	0.194988	-3.12853	0.0352351	1.45302	1 vs 2	0.306925	P < 0.05
SF3A1	-0.0817042	1.05537	-0.0774177	0.942009	0.0259449	1 vs 2	0.981035	NS or Estimate < 0.5
MARCHF2	1.59094	0.46185	3.4447	0.0261809	1.58202	1 vs 2	0.279909	P < 0.05
B4GALT2	0.446617	1.02542	0.435543	0.685641	0.163904	1 vs 2	0.904666	NS or Estimate < 0.5
OR10G3	-3.38849	0.547816	-6.18545	0.0034717	2.45946	1 vs 2	0.113638	P < 0.05
OR5B3	-0.415037	0.745356	-0.556831	0.607326	0.216578	1 vs 2	0.872444	NS or Estimate < 0.5
OR4B1	-0.684156	0.688519	-0.993662	0.376631	0.424084	1 vs 2	0.743348	NS or Estimate < 0.5
NFKBIZ	0.756487	0.941918	0.803135	0.466907	0.33077	1 vs 2	0.80015	NS or Estimate < 0.5
OR2A2	-0.994026	0.732321	-1.35736	0.2462	0.608713	1 vs 2	0.647993	NS or Estimate < 0.5
OR4K15	0.113283	1.06807	0.106063	0.920638	0.035911	1 vs 2	0.972232	NS or Estimate < 0.5
OR5D16	-0.276692	0.386175	-0.716493	0.513294	0.289634	1 vs 2	0.820455	NS or Estimate < 0.5
OR6C75	0.446617	0.739906	0.603613	0.578659	0.237577	1 vs 2	0.855977	NS or Estimate < 0.5
OR6C70	0.692272	0.587238	1.17886	0.303788	0.51743	1 vs 2	0.698395	NS or Estimate < 0.5
CPM	1.30827	0.386175	3.38777	0.0275868	1.5593	1 vs 2	0.28734	P < 0.05
OR4F21	0.0801048	0.823784	0.09724	0.927213	0.0328203	1 vs 2	0.975065	NS or Estimate < 0.5
OR4A47	0.308271	0.739906	0.416635	0.698332	0.155938	1 vs 2	0.912741	NS or Estimate < 0.5
OR6C65	-0.415037	1.09457	-0.379179	0.723824	0.140367	1 vs 2	0.918424	NS or Estimate < 0.5
SF3B1	2.08225	0.946304	2.2004	0.0926114	1.03334	1 vs 2	0.4239	NS or Estimate < 0.5
OR5B2	-2.13835	0.386175	-5.53724	0.00519985	2.28401	1 vs 2	0.139432	P < 0.05
ITGB4	0.900807	0.373565	2.41138	0.0734451	1.13404	1 vs 2	0.393881	NS or Estimate < 0.5
CHEK2	-0.502716	0.68796	-0.730734	0.505441	0.29633	1 vs 2	0.820455	NS or Estimate < 0.5
VPS54	1.00597	0.46185	2.17814	0.0949418	1.02254	1 vs 2	0.432204	NS or Estimate < 0.5
GBA	0.836592	0.375892	2.22561	0.0900485	1.04552	1 vs 2	0.422978	NS or Estimate < 0.5
NUMB	1.25909	0.781455	1.61121	0.182426	0.738914	1 vs 2	0.586205	NS or Estimate < 0.5
ADAM9	-0.0817042	0.546134	-0.149605	0.888317	0.0514322	1 vs 2	0.963485	NS or Estimate < 0.5
ZNF780B	0.113283	0.386175	0.293347	0.783847	0.105769	1 vs 2	0.937326	NS or Estimate < 0.5
ATP8B2	-1.0817	0.666667	-1.62256	0.180005	0.744716	1 vs 2	0.581153	NS or Estimate < 0.5
ERBB2	-0.0485256	0.940381	-0.0516021	0.96132	0.0171321	1 vs 2	0.989029	NS or Estimate < 0.5
IP6K2	-0.22005	0.639823	-0.343923	0.748223	0.125969	1 vs 2	0.921926	NS or Estimate < 0.5
ERBB3	0.672641	0.771332	0.872051	0.432398	0.364116	1 vs 2	0.775009	NS or Estimate < 0.5
KRTAP5-1	0.358939	0.985872	0.364082	0.734226	0.13417	1 vs 2	0.920156	NS or Estimate < 0.5
RPS3A	2.36048	0.20434	11.5517	0.000320752	3.49383	1 vs 2	0.0406682	FDR < 0.05
YBEY	0.251629	0.546134	0.460746	0.668917	0.174627	1 vs 2	0.899186	NS or Estimate < 0.5
LRRC37A2	0.887259	0.53978	1.64374	0.175575	0.755538	1 vs 2	0.577933	NS or Estimate < 0.5
TCEAL9	0.77995	0.441867	1.76512	0.152303	0.81729	1 vs 2	0.542994	NS or Estimate < 0.5
ARHGAP17	0.446617	0.482977	0.924717	0.40745	0.389926	1 vs 2	0.764993	NS or Estimate < 0.5
TCEAL1	-0.660693	0.661452	-0.998852	0.374394	0.426671	1 vs 2	0.741711	NS or Estimate < 0.5
SLC25A25	-0.748371	0.349508	-2.14122	0.0989527	1.00457	1 vs 2	0.435969	NS or Estimate < 0.5
SPIN2B	-1.71136	0.760628	-2.24993	0.0876519	1.05724	1 vs 2	0.421296	NS or Estimate < 0.5
TCEAL4	2.08756	0.344664	6.0568	0.00375065	2.42589	1 vs 2	0.117394	P < 0.05
TCEAL6	-1.0817	0.942809	-1.14732	0.315207	0.501404	1 vs 2	0.704759	NS or Estimate < 0.5
LRRC18	-0.276692	0.462739	-0.597944	0.582085	0.235013	1 vs 2	0.85702	NS or Estimate < 0.5
ALG3	-0.67424	0.833749	-0.808685	0.464049	0.333436	1 vs 2	0.799092	NS or Estimate < 0.5
LRIF1	0.389975	0.752556	0.5182	0.631663	0.199515	1 vs 2	0.882129	NS or Estimate < 0.5
RPS4X	1.94612	0.12134	16.0386	8.83719e-05	4.05369	1 vs 2	0.0191707	FDR < 0.05
ATN1	0.692272	0.850057	0.814383	0.46113	0.336177	1 vs 2	0.797703	NS or Estimate < 0.5
SDCBP	1.41156	0.8107	1.74116	0.156626	0.805136	1 vs 2	0.549711	NS or Estimate < 0.5
KLHL5	0.0566417	0.386175	0.146674	0.890485	0.0503733	1 vs 2	0.963485	NS or Estimate < 0.5
C8orf48	-0.502716	0.68796	-0.730734	0.505441	0.29633	1 vs 2	0.820455	NS or Estimate < 0.5
NTRK2	0.404773	0.446052	0.907456	0.415491	0.381438	1 vs 2	0.770426	NS or Estimate < 0.5
SCP2	-0.522347	0.519141	-1.00618	0.371258	0.430324	1 vs 2	0.741711	NS or Estimate < 0.5
ZNF483	-0.415037	0.275754	-1.5051	0.20675	0.684554	1 vs 2	0.613818	NS or Estimate < 0.5
IGIP	-0.805012	0.194988	-4.12853	0.0145112	1.8383	1 vs 2	0.218503	P < 0.05
IGF2BP2	0.584963	0.67274	0.869523	0.433627	0.362884	1 vs 2	0.775712	NS or Estimate < 0.5
SPOP	0.113283	0.68087	0.16638	0.875929	0.057531	1 vs 2	0.962053	NS or Estimate < 0.5
BRWD1	0.395949	0.612399	0.646554	0.553148	0.257158	1 vs 2	0.841815	NS or Estimate < 0.5
ERV3-1	-1.03104	0.985085	-1.04665	0.354338	0.450582	1 vs 2	0.735014	NS or Estimate < 0.5
SETD4	-0.748371	0.745356	-1.00404	0.372168	0.429261	1 vs 2	0.741711	NS or Estimate < 0.5
GEMIN7	0.220593	0.395742	0.557415	0.606963	0.216838	1 vs 2	0.872444	NS or Estimate < 0.5
EI24	0.534295	0.824366	0.648128	0.552228	0.257881	1 vs 2	0.841327	NS or Estimate < 0.5
RASL10A	1.13291	0.620016	1.82723	0.141682	0.848686	1 vs 2	0.526937	NS or Estimate < 0.5
RWDD1	1.18741	0.228909	5.18727	0.00657335	2.18221	1 vs 2	0.152389	P < 0.05
TULP4	-0.276692	0.694597	-0.398349	0.710721	0.148301	1 vs 2	0.918424	NS or Estimate < 0.5
HCST	0.251629	0.502143	0.501111	0.642614	0.19205	1 vs 2	0.884268	NS or Estimate < 0.5
TRPM3	-0.869228	0.557909	-1.55801	0.19423	0.711684	1 vs 2	0.597586	NS or Estimate < 0.5
LMBRD2	0.520747	0.778829	0.668628	0.54034	0.267333	1 vs 2	0.832466	NS or Estimate < 0.5
SS18	-0.243513	0.593628	-0.410211	0.702671	0.153248	1 vs 2	0.916256	NS or Estimate < 0.5
IRGQ	-0.610025	0.200317	-3.0453	0.0382033	1.4179	1 vs 2	0.315139	P < 0.05
TFG	2.11328	0.659283	3.20543	0.0327311	1.48504	1 vs 2	0.300401	P < 0.05
OPTN	0.766403	0.711179	1.07765	0.341843	0.466173	1 vs 2	0.724957	NS or Estimate < 0.5
COA5	-0.0310365	0.475018	-0.0653374	0.95104	0.021801	1 vs 2	0.984695	NS or Estimate < 0.5
C18orf25	-0.0817042	0.892984	-0.0914957	0.931498	0.0308182	1 vs 2	0.976822	NS or Estimate < 0.5
TRIM72	-1.52235	0.823518	-1.84859	0.138215	0.859444	1 vs 2	0.521098	NS or Estimate < 0.5
CISD2	0.389975	0.727035	0.536391	0.62013	0.207518	1 vs 2	0.875396	NS or Estimate < 0.5
C4orf46	1.04395	0.301701	3.46022	0.0258125	1.58817	1 vs 2	0.278766	P < 0.05
EID3	0.113283	0.570297	0.198639	0.852233	0.0694419	1 vs 2	0.955342	NS or Estimate < 0.5
LAMTOR4	0.641604	0.570297	1.12504	0.323513	0.490108	1 vs 2	0.704759	NS or Estimate < 0.5
GPX8	0.251629	0.471405	0.533786	0.621773	0.206368	1 vs 2	0.875396	NS or Estimate < 0.5
ZNF761	1.16395	0.563986	2.0638	0.107987	0.966629	1 vs 2	0.461428	NS or Estimate < 0.5
STEAP3	-0.994026	0.654969	-1.51767	0.203703	0.691002	1 vs 2	0.611169	NS or Estimate < 0.5
SLC41A3	0.00597397	0.97842	0.00610573	0.995421	0.00199332	1 vs 2	0.996034	NS or Estimate < 0.5
KLF6	-0.169382	0.603314	-0.280753	0.792823	0.100824	1 vs 2	0.941523	NS or Estimate < 0.5
SEPTIN2	0.413438	0.670712	0.616417	0.570971	0.243386	1 vs 2	0.851493	NS or Estimate < 0.5
TMEM64	0.308271	0.624687	0.49348	0.64754	0.188733	1 vs 2	0.884268	NS or Estimate < 0.5
LGMN	0.0566417	0.646118	0.0876646	0.934357	0.0294873	1 vs 2	0.976921	NS or Estimate < 0.5
SLC7A2	0.220593	1.00909	0.218605	0.837658	0.0769332	1 vs 2	0.955283	NS or Estimate < 0.5
MXI1	0.553926	0.623325	0.888663	0.424396	0.372229	1 vs 2	0.770426	NS or Estimate < 0.5
KYAT3	-0.415037	0.745356	-0.556831	0.607326	0.216578	1 vs 2	0.872444	NS or Estimate < 0.5
TFIP11	-1.22005	0.570297	-2.13933	0.0991629	1.00365	1 vs 2	0.436708	NS or Estimate < 0.5
ADGRL1	-0.138346	0.739906	-0.186978	0.860779	0.0651084	1 vs 2	0.957042	NS or Estimate < 0.5
RBPMS	1.55393	0.507324	3.06299	0.0375489	1.4254	1 vs 2	0.314928	P < 0.05
CFAP58	-0.169382	0.661452	-0.256076	0.810522	0.0912351	1 vs 2	0.949535	NS or Estimate < 0.5
WDR89	-0.748371	0.933996	-0.801257	0.467877	0.329868	1 vs 2	0.800716	NS or Estimate < 0.5
ZNF121	0.358939	0.429241	0.836217	0.450077	0.346713	1 vs 2	0.791489	NS or Estimate < 0.5
FNIP1	0.974938	0.710137	1.37289	0.241725	0.616679	1 vs 2	0.64548	NS or Estimate < 0.5
SULT1C3	-0.169382	0.865088	-0.195798	0.854313	0.0683831	1 vs 2	0.956727	NS or Estimate < 0.5
TDP1	0.553926	0.490396	1.12955	0.321815	0.492394	1 vs 2	0.704759	NS or Estimate < 0.5
RAB19	-1.61002	0.441867	-3.64369	0.0218932	1.65969	1 vs 2	0.254504	P < 0.05
CCT3	-0.0432118	0.633132	-0.0682508	0.948862	0.0227972	1 vs 2	0.983232	NS or Estimate < 0.5
DSP	1.98825	0.659475	3.0149	0.0393603	1.40494	1 vs 2	0.320672	P < 0.05
NIPA2	0.187414	0.653577	0.286751	0.788543	0.103175	1 vs 2	0.93959	NS or Estimate < 0.5
TCP1	0.0158898	0.600082	0.0264793	0.980143	0.00871037	1 vs 2	0.991145	NS or Estimate < 0.5
PPP2CB	0.918296	0.563155	1.63063	0.178303	0.748841	1 vs 2	0.581153	NS or Estimate < 0.5
SH3D19	1.99457	0.0876781	22.7488	2.2118e-05	4.65525	1 vs 2	0.00841304	FDR < 0.05
CDKL4	-0.943358	0.386175	-2.44283	0.0709919	1.14879	1 vs 2	0.387215	NS or Estimate < 0.5
CLSTN1	0.389975	1.06566	0.365947	0.732937	0.134933	1 vs 2	0.920156	NS or Estimate < 0.5
CADPS2	0.251629	0.333333	0.754888	0.492327	0.307747	1 vs 2	0.815068	NS or Estimate < 0.5
ARMCX6	-0.0174891	0.847164	-0.0206443	0.984518	0.00677629	1 vs 2	0.99371	NS or Estimate < 0.5
SLX4IP	-0.553383	0.441867	-1.25238	0.27866	0.554926	1 vs 2	0.676545	NS or Estimate < 0.5
C20orf202	-1.0817	0.333333	-3.24511	0.0315211	1.5014	1 vs 2	0.296992	P < 0.05
SPANXN5	-0.748371	0.546134	-1.37031	0.242463	0.615354	1 vs 2	0.64548	NS or Estimate < 0.5
BRD9	0.113283	0.782596	0.144753	0.891906	0.0496807	1 vs 2	0.963485	NS or Estimate < 0.5
KIAA0930	-1.62966	0.444936	-3.66268	0.0215294	1.66697	1 vs 2	0.254504	P < 0.05
TMEM230	-0.189014	0.552519	-0.342094	0.749498	0.125229	1 vs 2	0.921926	NS or Estimate < 0.5
DNASE1L1	-0.67424	0.759655	-0.887561	0.424923	0.37169	1 vs 2	0.770426	NS or Estimate < 0.5
ANKRD16	-0.717334	0.592958	-1.20976	0.292978	0.533166	1 vs 2	0.688188	NS or Estimate < 0.5
PKD1	0.937927	0.475018	1.97451	0.119551	0.922447	1 vs 2	0.485478	NS or Estimate < 0.5
SSBP3	1.43307	0.761472	1.88197	0.132978	0.876221	1 vs 2	0.510815	NS or Estimate < 0.5
SYTL3	-0.610025	0.624687	-0.976529	0.384096	0.41556	1 vs 2	0.749312	NS or Estimate < 0.5
FAM168B	-0.276692	0.386175	-0.716493	0.513294	0.289634	1 vs 2	0.820455	NS or Estimate < 0.5
C10orf62	0.308271	0.462739	0.666188	0.541746	0.266204	1 vs 2	0.832466	NS or Estimate < 0.5
SSBP4	0.00597397	0.79816	0.00748468	0.994387	0.00244476	1 vs 2	0.995259	NS or Estimate < 0.5
RPS6	1.11408	0.293807	3.79187	0.0192379	1.71584	1 vs 2	0.243832	P < 0.05
LRRC38	-0.284265	0.569019	-0.49957	0.643607	0.191379	1 vs 2	0.884268	NS or Estimate < 0.5
ZNF766	1.25163	0.471405	2.65511	0.0566789	1.24658	1 vs 2	0.355141	NS or Estimate < 0.5
TTC7B	-0.145919	0.619962	-0.235368	0.825482	0.0832923	1 vs 2	0.951003	NS or Estimate < 0.5
PIK3R6	-0.748371	0.666667	-1.12256	0.32445	0.488852	1 vs 2	0.704759	NS or Estimate < 0.5
SAMD15	0.520747	0.580597	0.896917	0.420466	0.376269	1 vs 2	0.770426	NS or Estimate < 0.5
SPIN3	0.0256052	1.10902	0.023088	0.982686	0.00758528	1 vs 2	0.992641	NS or Estimate < 0.5
IBA57	0.113283	0.659283	0.171828	0.871916	0.0595256	1 vs 2	0.959864	NS or Estimate < 0.5
TDRD6	-1.0817	0.666667	-1.62256	0.180005	0.744716	1 vs 2	0.581153	NS or Estimate < 0.5
TMEM244	0.584963	0.777407	0.752454	0.493636	0.306593	1 vs 2	0.815068	NS or Estimate < 0.5
ACER2	-0.276692	0.441867	-0.626188	0.565151	0.247836	1 vs 2	0.84674	NS or Estimate < 0.5
PRAMEF6	-1.36897	1.37305	-0.997031	0.375177	0.425763	1 vs 2	0.742955	NS or Estimate < 0.5
MTX3	-0.0817042	0.471405	-0.173321	0.870817	0.0600733	1 vs 2	0.959864	NS or Estimate < 0.5
ERCC6L2	-0.0817042	0.412203	-0.198213	0.852544	0.069283	1 vs 2	0.955542	NS or Estimate < 0.5
SLC6A17	-0.243513	0.722042	-0.337256	0.752878	0.123275	1 vs 2	0.923722	NS or Estimate < 0.5
C6orf58	-0.502716	0.714751	-0.703344	0.520624	0.283476	1 vs 2	0.823727	NS or Estimate < 0.5
MUC21	-1.61002	0.546134	-2.94804	0.0420513	1.37622	1 vs 2	0.326671	P < 0.05
GOLGA7B	-1.01749	0.619962	-1.64121	0.176098	0.754247	1 vs 2	0.577983	NS or Estimate < 0.5
THEMIS	-0.553383	0.624687	-0.885857	0.425739	0.370856	1 vs 2	0.770426	NS or Estimate < 0.5
RAP1A	-0.00757336	0.785659	-0.0096395	0.992771	0.00315113	1 vs 2	0.995259	NS or Estimate < 0.5
LIPJ	-0.0250625	0.811524	-0.0308832	0.976842	0.0101756	1 vs 2	0.990381	NS or Estimate < 0.5
RAP1B	1.8191	0.522725	3.48003	0.0253512	1.596	1 vs 2	0.275228	P < 0.05
LDLRAD1	-0.994026	0.54862	-1.81187	0.144234	0.840933	1 vs 2	0.531306	NS or Estimate < 0.5
C1orf189	1.22059	0.533491	2.28794	0.0840479	1.07547	1 vs 2	0.420854	NS or Estimate < 0.5
MYBPHL	0.423154	0.656992	0.644077	0.554598	0.256021	1 vs 2	0.842838	NS or Estimate < 0.5
HERPUD1	0.941759	0.461585	2.04027	0.11091	0.955031	1 vs 2	0.464808	NS or Estimate < 0.5
FYTTD1	-0.67424	0.557909	-1.20851	0.293405	0.532532	1 vs 2	0.68859	NS or Estimate < 0.5
MAGEA10	-0.748371	0.666667	-1.12256	0.32445	0.488852	1 vs 2	0.704759	NS or Estimate < 0.5
MAGEA4	-4.27794	0.664601	-6.43686	0.00299653	2.52338	1 vs 2	0.106591	P < 0.05
C1GALT1C1	-0.553383	0.441867	-1.25238	0.27866	0.554926	1 vs 2	0.676545	NS or Estimate < 0.5
SLC13A3	0.887259	0.592958	1.49633	0.208905	0.680052	1 vs 2	0.615271	NS or Estimate < 0.5
ZMAT1	-0.85568	0.698852	-1.22441	0.287978	0.540641	1 vs 2	0.684772	NS or Estimate < 0.5
MCCD1	0.113283	0.570297	0.198639	0.852233	0.0694419	1 vs 2	0.955342	NS or Estimate < 0.5
OLA1	2.11926	0.481857	4.3981	0.0117084	1.9315	1 vs 2	0.196499	P < 0.05
PNLIPRP3	-1.0817	0.660763	-1.63705	0.176961	0.752122	1 vs 2	0.579788	NS or Estimate < 0.5
BTBD1	0.446617	1.02806	0.434428	0.686386	0.163432	1 vs 2	0.904957	NS or Estimate < 0.5
RPS8	2.63774	0.26709	9.87586	0.000589841	3.22927	1 vs 2	0.0524015	P < 0.05
MSL1	0.433069	0.362997	1.19304	0.298781	0.524647	1 vs 2	0.69285	NS or Estimate < 0.5
PRAMEF8	-0.22005	0.546134	-0.402923	0.707611	0.150205	1 vs 2	0.918096	NS or Estimate < 0.5
ROPN1B	-1.0817	0.806521	-1.3412	0.250947	0.600419	1 vs 2	0.653095	NS or Estimate < 0.5
NTRK3	-0.307728	0.776428	-0.396338	0.712089	0.147466	1 vs 2	0.918424	NS or Estimate < 0.5
DNAJC21	0.818442	0.807367	1.01372	0.368052	0.434091	1 vs 2	0.741711	NS or Estimate < 0.5
TRIM61	-0.610025	0.567989	-1.07401	0.343291	0.464338	1 vs 2	0.726429	NS or Estimate < 0.5
MYLK4	-0.522347	0.519141	-1.00618	0.371258	0.430324	1 vs 2	0.741711	NS or Estimate < 0.5
FOXP4	0.308271	0.441867	0.697655	0.523819	0.280819	1 vs 2	0.825319	NS or Estimate < 0.5
SEC61G	0.430609	0.331283	1.29982	0.263507	0.579208	1 vs 2	0.667707	NS or Estimate < 0.5
KRTAP5-7	-0.276692	0.850628	-0.325279	0.761273	0.11846	1 vs 2	0.929419	NS or Estimate < 0.5
SLC45A2	-0.415037	0.745356	-0.556831	0.607326	0.216578	1 vs 2	0.872444	NS or Estimate < 0.5
GRP	-0.415037	0.471405	-0.880427	0.428348	0.368203	1 vs 2	0.770426	NS or Estimate < 0.5
ITM2C	1.30827	0.386175	3.38777	0.0275868	1.5593	1 vs 2	0.28734	P < 0.05
DCTD	0.251629	0.666667	0.377444	0.725016	0.139652	1 vs 2	0.918424	NS or Estimate < 0.5
ABI1	-1.61002	0.570297	-2.82314	0.047676	1.3217	1 vs 2	0.330914	P < 0.05
NHLRC3	0.446617	1.15936	0.385226	0.719678	0.142862	1 vs 2	0.918424	NS or Estimate < 0.5
ZNF260	0.446617	0.739906	0.603613	0.578659	0.237577	1 vs 2	0.855977	NS or Estimate < 0.5
NUDT17	-0.0817042	0.349508	-0.233769	0.826641	0.0826831	1 vs 2	0.951003	NS or Estimate < 0.5
RGMB	0.113283	0.570297	0.198639	0.852233	0.0694419	1 vs 2	0.955342	NS or Estimate < 0.5
DDX60L	0.339307	0.953519	0.355847	0.739929	0.13081	1 vs 2	0.920156	NS or Estimate < 0.5
SPIN4	-0.0817042	0.942809	-0.0866604	0.935106	0.0291391	1 vs 2	0.977161	NS or Estimate < 0.5
LRRC73	0.163951	0.443189	0.369935	0.730185	0.136567	1 vs 2	0.918432	NS or Estimate < 0.5
TCEAL5	-0.169382	0.492475	-0.343941	0.74821	0.125976	1 vs 2	0.921926	NS or Estimate < 0.5
KNOP1	-0.0817042	0.909166	-0.0898671	0.932713	0.0302521	1 vs 2	0.976921	NS or Estimate < 0.5
C9orf152	-0.163408	0.868039	-0.18825	0.859845	0.0655797	1 vs 2	0.957042	NS or Estimate < 0.5
RPS9	0.797791	0.224325	3.55641	0.023662	1.62595	1 vs 2	0.265583	P < 0.05
CXorf66	0.77995	1.02806	0.758664	0.490299	0.309539	1 vs 2	0.815068	NS or Estimate < 0.5
MPST	-1.03104	1.01675	-1.01405	0.367912	0.434256	1 vs 2	0.741711	NS or Estimate < 0.5
SEH1L	-0.132372	0.661452	-0.200123	0.851147	0.0699954	1 vs 2	0.955342	NS or Estimate < 0.5
LURAP1	-0.805012	0.928393	-0.867103	0.434805	0.361705	1 vs 2	0.77633	NS or Estimate < 0.5
ZC2HC1B	-0.748371	0.333333	-2.24511	0.0881211	1.05492	1 vs 2	0.421296	NS or Estimate < 0.5
CFAP126	-0.85568	0.78138	-1.09509	0.334991	0.474967	1 vs 2	0.716443	NS or Estimate < 0.5
CCDC184	2.1232	0.339462	6.25459	0.0033323	2.47726	1 vs 2	0.111839	P < 0.05
PRR25	-0.610025	0.194988	-3.12853	0.0352351	1.45302	1 vs 2	0.306925	P < 0.05
PRR23B	0.520747	0.580597	0.896917	0.420466	0.376269	1 vs 2	0.770426	NS or Estimate < 0.5
ZNF793	-0.307728	0.258131	-1.19214	0.299096	0.524189	1 vs 2	0.69285	NS or Estimate < 0.5
VSIG8	0.163951	0.443189	0.369935	0.730185	0.136567	1 vs 2	0.918432	NS or Estimate < 0.5
PTRHD1	1.49728	0.760169	1.96967	0.120214	0.920044	1 vs 2	0.486136	NS or Estimate < 0.5
C17orf97	-0.276692	0.482977	-0.572888	0.597386	0.223745	1 vs 2	0.868133	NS or Estimate < 0.5
FIGNL2	-0.748371	0.702318	-1.06557	0.346663	0.460092	1 vs 2	0.726429	NS or Estimate < 0.5
EIF2AK4	-0.610025	0.441867	-1.38056	0.239542	0.620619	1 vs 2	0.64548	NS or Estimate < 0.5
PLIN5	-0.0398605	0.825903	-0.048263	0.96382	0.0160039	1 vs 2	0.989547	NS or Estimate < 0.5
PTCHD4	0.113283	0.782596	0.144753	0.891906	0.0496807	1 vs 2	0.963485	NS or Estimate < 0.5
RFPL4B	-1.01749	0.638685	-1.5931	0.186358	0.729652	1 vs 2	0.588781	NS or Estimate < 0.5
MAD1L1	-1.0817	0.502143	-2.15418	0.0975236	1.01089	1 vs 2	0.434969	NS or Estimate < 0.5
STAP2	-0.943358	0.570297	-1.65415	0.173439	0.760853	1 vs 2	0.575862	NS or Estimate < 0.5
SLTM	0.446617	1.13574	0.393238	0.714203	0.146179	1 vs 2	0.918424	NS or Estimate < 0.5
EXOC6	-0.748371	0.909166	-0.82314	0.456672	0.340396	1 vs 2	0.794649	NS or Estimate < 0.5
RPS10	1.58835	0.644646	2.46391	0.0693994	1.15864	1 vs 2	0.386867	NS or Estimate < 0.5
ANXA2R	-0.415037	0.602709	-0.68862	0.528922	0.276608	1 vs 2	0.826495	NS or Estimate < 0.5
DCUN1D2	0.0801048	0.73764	0.108596	0.918753	0.0368015	1 vs 2	0.971944	NS or Estimate < 0.5
FLG2	-0.22005	0.624687	-0.352256	0.742422	0.129349	1 vs 2	0.920156	NS or Estimate < 0.5
AKT1	0.251629	0.453521	0.554835	0.608569	0.21569	1 vs 2	0.872541	NS or Estimate < 0.5
CUTA	1.22414	0.697326	1.75548	0.154027	0.812402	1 vs 2	0.545282	NS or Estimate < 0.5
ODF3B	0.748914	0.584789	1.28065	0.26953	0.569393	1 vs 2	0.669978	NS or Estimate < 0.5
DDX19B	0.251629	0.674899	0.37284	0.728184	0.137759	1 vs 2	0.918424	NS or Estimate < 0.5
ETFB	-0.276692	0.386175	-0.716493	0.513294	0.289634	1 vs 2	0.820455	NS or Estimate < 0.5
FBXO44	-0.22005	0.546134	-0.402923	0.707611	0.150205	1 vs 2	0.918096	NS or Estimate < 0.5
KCNMA1	0.113283	0.659283	0.171828	0.871916	0.0595256	1 vs 2	0.959864	NS or Estimate < 0.5
ME3	-0.85568	1.02151	-0.837662	0.449353	0.347412	1 vs 2	0.790351	NS or Estimate < 0.5
TM9SF1	-0.660693	0.877982	-0.752513	0.493605	0.306621	1 vs 2	0.815068	NS or Estimate < 0.5
CFH	-0.169382	0.816263	-0.20751	0.845748	0.0727588	1 vs 2	0.955342	NS or Estimate < 0.5
LAT	1.44158	0.538541	2.67683	0.055411	1.2564	1 vs 2	0.350198	NS or Estimate < 0.5
CKMT1A	-0.415037	0.471405	-0.880427	0.428348	0.368203	1 vs 2	0.770426	NS or Estimate < 0.5
LLGL2	1.18741	0.619962	1.9153	0.127962	0.892919	1 vs 2	0.501209	NS or Estimate < 0.5
ALG1L	0.433069	0.627601	0.690039	0.528118	0.277269	1 vs 2	0.826495	NS or Estimate < 0.5
MPG	-1.41504	1	-1.41504	0.229976	0.638318	1 vs 2	0.640203	NS or Estimate < 0.5
RTKN	-1.35082	0.601501	-2.24575	0.0880585	1.05523	1 vs 2	0.421296	NS or Estimate < 0.5
DNAJC25	-0.943358	0.502143	-1.87867	0.133487	0.874562	1 vs 2	0.510815	NS or Estimate < 0.5
RPS12	2.11051	0.0975227	21.6413	2.6969e-05	4.56914	1 vs 2	0.00893457	FDR < 0.05
RPS13	2.09072	0.373217	5.60189	0.00498603	2.30224	1 vs 2	0.136551	P < 0.05
KHDC3L	-0.489168	1.17595	-0.415976	0.698777	0.155662	1 vs 2	0.913033	NS or Estimate < 0.5
MSMO1	0.918296	0.349508	2.6274	0.058345	1.234	1 vs 2	0.357381	NS or Estimate < 0.5
SUGP2	0.867628	0.377719	2.29702	0.0832115	1.07982	1 vs 2	0.418974	NS or Estimate < 0.5
TRIM36	0.0566417	0.570297	0.0993197	0.925663	0.0335471	1 vs 2	0.973785	NS or Estimate < 0.5
MAEA	-0.943358	0.360903	-2.61389	0.0591779	1.22784	1 vs 2	0.357381	NS or Estimate < 0.5
S100PBP	-0.136204	0.536652	-0.253803	0.81216	0.0903584	1 vs 2	0.949535	NS or Estimate < 0.5
GOPC	-0.350822	0.778829	-0.450448	0.675723	0.170231	1 vs 2	0.900438	NS or Estimate < 0.5
ALDH18A1	0.520747	0.601501	0.865747	0.435467	0.361045	1 vs 2	0.776701	NS or Estimate < 0.5
BTBD11	-1.27669	0.349508	-3.65283	0.0217172	1.6632	1 vs 2	0.254504	P < 0.05
ARHGAP8	-0.465705	0.825573	-0.564099	0.602814	0.219817	1 vs 2	0.872444	NS or Estimate < 0.5
RCCD1	0.308271	0.739906	0.416635	0.698332	0.155938	1 vs 2	0.912741	NS or Estimate < 0.5
DAPL1	-0.553383	0.850628	-0.650559	0.550809	0.258999	1 vs 2	0.841121	NS or Estimate < 0.5
VMAC	-0.502716	0.610347	-0.823656	0.45641	0.340645	1 vs 2	0.794649	NS or Estimate < 0.5
ERMAP	-1.00757	0.63322	-1.59119	0.186778	0.728674	1 vs 2	0.588781	NS or Estimate < 0.5
C14orf28	-0.85568	0.720841	-1.18706	0.300883	0.521602	1 vs 2	0.695336	NS or Estimate < 0.5
OS9	1.9183	0.546134	3.5125	0.0246162	1.60878	1 vs 2	0.270431	P < 0.05
HSP90AA1	2.71677	0.774081	3.50967	0.0246793	1.60767	1 vs 2	0.270453	P < 0.05
KIAA2026	0.497284	0.413512	1.20259	0.295453	0.529512	1 vs 2	0.690669	NS or Estimate < 0.5
TMEM30B	1.50326	0.688933	2.18201	0.0945319	1.02442	1 vs 2	0.430781	NS or Estimate < 0.5
ATP6AP1L	-1.68416	0.31387	-5.36577	0.00582379	2.23479	1 vs 2	0.146594	P < 0.05
RAB28	-1.22005	0.441867	-2.76112	0.050791	1.29421	1 vs 2	0.338038	NS or Estimate < 0.5
RNF215	-1.41504	0.471405	-3.00175	0.0398732	1.39932	1 vs 2	0.320672	P < 0.05
SH3PXD2B	-0.610025	1.02806	-0.593377	0.584855	0.232952	1 vs 2	0.858734	NS or Estimate < 0.5
GNG10	1.40477	0.461195	3.04594	0.0381794	1.41817	1 vs 2	0.315139	P < 0.05
RPS15	1.14278	0.315454	3.62267	0.0223043	1.65161	1 vs 2	0.257203	P < 0.05
SORBS3	0.163951	0.652219	0.251374	0.813911	0.0894233	1 vs 2	0.949535	NS or Estimate < 0.5
SH3BP5	1.35894	0.350181	3.88068	0.017831	1.74882	1 vs 2	0.236229	P < 0.05
MUC1	0.0256052	0.927811	0.0275974	0.979305	0.00908194	1 vs 2	0.990655	NS or Estimate < 0.5
MTCP1	-0.553383	0.850628	-0.650559	0.550809	0.258999	1 vs 2	0.841121	NS or Estimate < 0.5
EPM2A	0.0256052	0.440643	0.0581088	0.956449	0.0193382	1 vs 2	0.987011	NS or Estimate < 0.5
DKK3	0.477653	0.710833	0.671963	0.538423	0.268876	1 vs 2	0.832466	NS or Estimate < 0.5
SERBP1	2.43675	0.834386	2.92041	0.0432258	1.36426	1 vs 2	0.328501	P < 0.05
NR3C1	0.477653	0.519141	0.920084	0.409595	0.387645	1 vs 2	0.768169	NS or Estimate < 0.5
FPGS	-0.805012	0.624687	-1.28867	0.266997	0.573494	1 vs 2	0.669978	NS or Estimate < 0.5
SLC26A10	-0.629656	0.886279	-0.710449	0.516654	0.2868	1 vs 2	0.82154	NS or Estimate < 0.5
VPS13C	-0.155835	0.670528	-0.232406	0.827629	0.0821642	1 vs 2	0.95132	NS or Estimate < 0.5
ICE2	0.446617	1.00697	0.443524	0.680321	0.167286	1 vs 2	0.902248	NS or Estimate < 0.5
CAVIN4	0.163951	0.443189	0.369935	0.730185	0.136567	1 vs 2	0.918432	NS or Estimate < 0.5
RPS16	-0.847715	0.33092	-2.56169	0.0625258	1.20394	1 vs 2	0.365833	NS or Estimate < 0.5
PUM1	0.423154	0.943635	0.448429	0.677062	0.169372	1 vs 2	0.900818	NS or Estimate < 0.5
MYADM	0.220593	1.02886	0.214404	0.840719	0.0753493	1 vs 2	0.955342	NS or Estimate < 0.5
RPS17	1.50164	0.189718	7.91508	0.00137871	2.86053	1 vs 2	0.0722417	P < 0.05
RPS19	-0.453975	0.362322	-1.25296	0.278467	0.555226	1 vs 2	0.676545	NS or Estimate < 0.5
ZNF749	-0.22005	0.861804	-0.255336	0.811055	0.0909496	1 vs 2	0.949535	NS or Estimate < 0.5
GOLGA8A	1.12171	0.214524	5.22887	0.00638864	2.19459	1 vs 2	0.150871	P < 0.05
IQCB1	1.02561	1.08916	0.941645	0.399691	0.398276	1 vs 2	0.75665	NS or Estimate < 0.5
RPS21	-0.336563	0.280121	-1.20149	0.295834	0.528953	1 vs 2	0.690941	NS or Estimate < 0.5
S100A13	1.06515	1.20516	0.883824	0.426714	0.369863	1 vs 2	0.770426	NS or Estimate < 0.5
FBLIM1	-0.836049	0.443189	-1.88644	0.132293	0.878462	1 vs 2	0.510196	NS or Estimate < 0.5
ARF1	0.533459	0.432268	1.23409	0.284718	0.545585	1 vs 2	0.683609	NS or Estimate < 0.5
TM2D2	-0.610025	0.624687	-0.976529	0.384096	0.41556	1 vs 2	0.749312	NS or Estimate < 0.5
RTL5	-0.0817042	1.06139	-0.0769788	0.942337	0.0257937	1 vs 2	0.981035	NS or Estimate < 0.5
MSS51	-0.610025	0.928393	-0.657076	0.547017	0.261999	1 vs 2	0.838355	NS or Estimate < 0.5
LRRC24	-1.03104	0.68796	-1.49869	0.208323	0.681263	1 vs 2	0.615271	NS or Estimate < 0.5
FBXO48	0.163951	0.79816	0.205411	0.847281	0.0719726	1 vs 2	0.955342	NS or Estimate < 0.5
ZNF688	-1.35082	0.862877	-1.56549	0.192525	0.715514	1 vs 2	0.595037	NS or Estimate < 0.5
CD276	0.918296	0.546134	1.68145	0.167969	0.77477	1 vs 2	0.571396	NS or Estimate < 0.5
SLC6A9	1.11328	0.386175	2.88285	0.0448845	1.3479	1 vs 2	0.328501	P < 0.05
TGFBR2	0.479795	0.608798	0.788102	0.474716	0.323566	1 vs 2	0.80451	NS or Estimate < 0.5
EXOC1	0.0256052	0.750513	0.0341169	0.974418	0.0112545	1 vs 2	0.989644	NS or Estimate < 0.5
MINK1	1.61057	0.354695	4.54072	0.0104914	1.97917	1 vs 2	0.186205	P < 0.05
TRIM17	-1.0817	0.666667	-1.62256	0.180005	0.744716	1 vs 2	0.581153	NS or Estimate < 0.5
YIPF5	0.705819	0.743212	0.949687	0.396048	0.402252	1 vs 2	0.75524	NS or Estimate < 0.5
FNBP1L	1.51903	0.300453	5.05579	0.00720177	2.14256	1 vs 2	0.158286	P < 0.05
SC5D	-0.0817042	0.666667	-0.122556	0.908369	0.0417375	1 vs 2	0.968035	NS or Estimate < 0.5
RPS14	2.1025	0.178365	11.7876	0.000296407	3.52811	1 vs 2	0.0380512	FDR < 0.05
AFF3	0.00597397	0.638978	0.00934925	0.992988	0.00305592	1 vs 2	0.995259	NS or Estimate < 0.5
CD34	-1.28552	0.703979	-1.82607	0.141873	0.8481	1 vs 2	0.526957	NS or Estimate < 0.5
CHN1	0.251629	0.333333	0.754888	0.492327	0.307747	1 vs 2	0.815068	NS or Estimate < 0.5
U2AF1	0.584963	1	0.584963	0.58998	0.229163	1 vs 2	0.861769	NS or Estimate < 0.5
DUT	1.18741	0.669752	1.77292	0.150926	0.821237	1 vs 2	0.542786	NS or Estimate < 0.5
CXorf65	0.220593	0.592958	0.372021	0.728748	0.137423	1 vs 2	0.918424	NS or Estimate < 0.5
DPPA5	-0.489168	0.638685	-0.765899	0.486434	0.312976	1 vs 2	0.814291	NS or Estimate < 0.5
RAB12	1.83324	0.43167	4.24686	0.0131911	1.87972	1 vs 2	0.211399	P < 0.05
AARD	-0.0250625	0.441867	-0.0567195	0.957489	0.0188663	1 vs 2	0.987386	NS or Estimate < 0.5
VEGFA	1.29472	0.365569	3.54166	0.0239775	1.6202	1 vs 2	0.267514	P < 0.05
SPAG16	0.382402	0.589672	0.648499	0.552011	0.258052	1 vs 2	0.841121	NS or Estimate < 0.5
RPS24	2.91863	0.693274	4.20993	0.013587	1.86688	1 vs 2	0.213876	P < 0.05
RPS25	0.305389	0.355572	0.858868	0.438835	0.357698	1 vs 2	0.779139	NS or Estimate < 0.5
RPS26	0.47008	0.480907	0.977486	0.383676	0.416035	1 vs 2	0.749312	NS or Estimate < 0.5
CCM2	-0.748371	0.563155	-1.32889	0.25462	0.594107	1 vs 2	0.653574	NS or Estimate < 0.5
TCAIM	-0.169382	0.481857	-0.35152	0.742934	0.12905	1 vs 2	0.920156	NS or Estimate < 0.5
KCTD21	0.0566417	1.00538	0.0563387	0.957774	0.018737	1 vs 2	0.987386	NS or Estimate < 0.5
KIAA1755	-0.553383	0.739906	-0.747911	0.496088	0.304441	1 vs 2	0.816871	NS or Estimate < 0.5
RGS7BP	-1.96299	0.552519	-3.5528	0.0237388	1.62454	1 vs 2	0.26572	P < 0.05
SFMBT2	-0.415037	0.602709	-0.68862	0.528922	0.276608	1 vs 2	0.826495	NS or Estimate < 0.5
CPTP	-1.88672	0.397217	-4.74983	0.00897199	2.04711	1 vs 2	0.173727	P < 0.05
ZNF16	0.584963	0.471405	1.24089	0.28245	0.549058	1 vs 2	0.679596	NS or Estimate < 0.5
METTL17	0.358939	0.600328	0.597904	0.582109	0.234996	1 vs 2	0.85702	NS or Estimate < 0.5
RPS27	2.37722	0.247216	9.61595	0.000653886	3.1845	1 vs 2	0.0550443	P < 0.05
AP2B1	1.74891	0.414074	4.22367	0.013438	1.87167	1 vs 2	0.213635	P < 0.05
AP1G1	0.14432	0.92355	0.156266	0.883393	0.0538462	1 vs 2	0.963485	NS or Estimate < 0.5
ARHGAP5	0.464106	1.22114	0.38006	0.72322	0.14073	1 vs 2	0.918424	NS or Estimate < 0.5
PLPP4	-0.327359	0.610347	-0.53635	0.620156	0.207499	1 vs 2	0.875396	NS or Estimate < 0.5
SAMD5	0.692272	0.587238	1.17886	0.303788	0.51743	1 vs 2	0.698395	NS or Estimate < 0.5
RPS28	2.8929	0.137441	21.0483	3.01148e-05	4.52122	1 vs 2	0.00966496	FDR < 0.05
SPDYE2	0.358939	0.898237	0.399604	0.709867	0.148823	1 vs 2	0.918424	NS or Estimate < 0.5
ZNF816	0.385951	0.636762	0.606114	0.577152	0.23871	1 vs 2	0.855977	NS or Estimate < 0.5
CYB5RL	0.641604	0.317943	2.01798	0.113759	0.944015	1 vs 2	0.47213	NS or Estimate < 0.5
IFIT3	-1.18901	0.552519	-2.15199	0.0977634	1.00982	1 vs 2	0.434969	NS or Estimate < 0.5
SRSF7	0.584963	0.639823	0.914257	0.412307	0.384779	1 vs 2	0.769519	NS or Estimate < 0.5
TP53BP2	0.32576	0.395677	0.823298	0.456591	0.340472	1 vs 2	0.794649	NS or Estimate < 0.5
PLAA	0.599761	0.661392	0.906816	0.415792	0.381124	1 vs 2	0.770426	NS or Estimate < 0.5
SCMH1	-0.307728	0.991431	-0.310388	0.771766	0.112514	1 vs 2	0.933464	NS or Estimate < 0.5
PLD3	-1.22005	0.609388	-2.00209	0.11584	0.936143	1 vs 2	0.475675	NS or Estimate < 0.5
GASK1B	1.04907	0.533549	1.96621	0.120692	0.91832	1 vs 2	0.487229	NS or Estimate < 0.5
CT55	-0.748371	0.333333	-2.24511	0.0881211	1.05492	1 vs 2	0.421296	NS or Estimate < 0.5
RNLS	-0.22005	0.68087	-0.323189	0.762742	0.117622	1 vs 2	0.930549	NS or Estimate < 0.5
ERGIC1	-0.0817042	0.702318	-0.116335	0.912994	0.0395322	1 vs 2	0.969142	NS or Estimate < 0.5
TRMT11	-0.358396	0.570297	-0.628438	0.563816	0.248863	1 vs 2	0.84674	NS or Estimate < 0.5
MCUR1	0.830618	0.353379	2.3505	0.0784724	1.10528	1 vs 2	0.40847	NS or Estimate < 0.5
DHRS12	0.692272	0.886279	0.781099	0.478388	0.320219	1 vs 2	0.807005	NS or Estimate < 0.5
DNAJB14	1.44662	0.441867	3.27387	0.0306771	1.51319	1 vs 2	0.296992	P < 0.05
DDX59	-0.748371	0.702318	-1.06557	0.346663	0.460092	1 vs 2	0.726429	NS or Estimate < 0.5
CFAP206	-1.05067	0.955876	-1.09917	0.333406	0.477026	1 vs 2	0.714541	NS or Estimate < 0.5
ALDH3A2	-1.03986	0.770757	-1.34914	0.248603	0.604494	1 vs 2	0.652411	NS or Estimate < 0.5
CSNK1G3	1.08225	0.346059	3.12735	0.0352753	1.45253	1 vs 2	0.306959	P < 0.05
RPS29	-0.0646432	0.278042	-0.232494	0.827566	0.0821976	1 vs 2	0.95132	NS or Estimate < 0.5
RCE1	-0.660693	0.674252	-0.97989	0.382622	0.417231	1 vs 2	0.749312	NS or Estimate < 0.5
TMPO	1.04907	0.523943	2.00225	0.115818	0.936224	1 vs 2	0.475675	NS or Estimate < 0.5
PSRC1	0.0256052	1.02528	0.0249739	0.981272	0.00821058	1 vs 2	0.991665	NS or Estimate < 0.5
STK24	0.746771	0.114817	6.50404	0.00288335	2.5401	1 vs 2	0.105007	P < 0.05
SPINT1	1.43521	0.646118	2.22128	0.0904831	1.04343	1 vs 2	0.423476	NS or Estimate < 0.5
LCMT1	-1.10517	0.465152	-2.37593	0.0763267	1.11732	1 vs 2	0.402814	NS or Estimate < 0.5
HNRNPH2	-1.61002	0.194988	-8.25707	0.00117363	2.93047	1 vs 2	0.0663855	P < 0.05
OAS1	0.308271	0.462739	0.666188	0.541746	0.266204	1 vs 2	0.832466	NS or Estimate < 0.5
USP16	0.641604	0.386175	1.66143	0.171962	0.764567	1 vs 2	0.575862	NS or Estimate < 0.5
RRM1	-0.307728	0.674252	-0.4564	0.671785	0.172769	1 vs 2	0.899214	NS or Estimate < 0.5
FBXO7	0.503258	0.471405	1.06757	0.345861	0.461098	1 vs 2	0.726429	NS or Estimate < 0.5
EXTL2	-0.886717	0.823075	-1.07732	0.341974	0.466007	1 vs 2	0.724957	NS or Estimate < 0.5
GLUL	1.37838	0.678878	2.03037	0.112165	0.950143	1 vs 2	0.468075	NS or Estimate < 0.5
NGRN	-0.85568	0.804068	-1.06419	0.34722	0.459396	1 vs 2	0.727299	NS or Estimate < 0.5
SRGAP3	-0.771834	0.694391	-1.11153	0.328646	0.483272	1 vs 2	0.709373	NS or Estimate < 0.5
SAR1B	-0.0817042	0.919491	-0.088858	0.933466	0.0299016	1 vs 2	0.976921	NS or Estimate < 0.5
TMEM98	-0.169382	0.937103	-0.180751	0.865352	0.0628074	1 vs 2	0.959633	NS or Estimate < 0.5
CSTF3	-1.07413	0.268066	-4.00696	0.016037	1.79488	1 vs 2	0.22341	P < 0.05
CSTF1	0.77995	0.609388	1.27989	0.269773	0.569002	1 vs 2	0.669978	NS or Estimate < 0.5
PPM1B	0.974938	0.68087	1.4319	0.225436	0.646977	1 vs 2	0.636465	NS or Estimate < 0.5
DNAAF4	0.113283	0.602709	0.187957	0.86006	0.0654711	1 vs 2	0.957042	NS or Estimate < 0.5
PHF12	-0.85568	0.750513	-1.14013	0.317866	0.497755	1 vs 2	0.704759	NS or Estimate < 0.5
AMZ2	1.52075	0.718936	2.11527	0.101883	0.991899	1 vs 2	0.442239	NS or Estimate < 0.5
RARA	1.3824	0.411195	3.36191	0.0282546	1.54891	1 vs 2	0.289157	P < 0.05
TRPT1	-0.553383	0.850628	-0.650559	0.550809	0.258999	1 vs 2	0.841121	NS or Estimate < 0.5
ZNF404	0.14432	0.726291	0.198708	0.852182	0.0694674	1 vs 2	0.955342	NS or Estimate < 0.5
DCLRE1C	-2.68416	0.460598	-5.82755	0.00431939	2.36458	1 vs 2	0.124173	P < 0.05
TRAF5	1.02561	1.10902	0.924781	0.40742	0.389958	1 vs 2	0.764993	NS or Estimate < 0.5
DMAP1	0.251629	0.349508	0.719953	0.511377	0.291259	1 vs 2	0.820455	NS or Estimate < 0.5
ERP29	1.62806	0.896473	1.81607	0.143531	0.843054	1 vs 2	0.529234	NS or Estimate < 0.5
EXOSC9	0.715735	0.878369	0.814845	0.460894	0.336399	1 vs 2	0.797703	NS or Estimate < 0.5
NHP2	1.44876	0.541087	2.67749	0.0553726	1.25671	1 vs 2	0.35017	NS or Estimate < 0.5
KCNIP1	-0.496742	0.471405	-1.05375	0.351441	0.454148	1 vs 2	0.731664	NS or Estimate < 0.5
ITPRIPL2	-0.836049	0.73935	-1.13079	0.32135	0.493022	1 vs 2	0.704759	NS or Estimate < 0.5
KCNIP3	-2.18901	0.552519	-3.96188	0.0166514	1.77855	1 vs 2	0.226804	P < 0.05
SORBS1	1.16395	0.657374	1.77061	0.151332	0.820068	1 vs 2	0.542994	NS or Estimate < 0.5
C18orf32	-0.610025	0.609388	-1.00105	0.373452	0.427765	1 vs 2	0.741711	NS or Estimate < 0.5
RGL3	0.446617	0.441867	1.01075	0.369311	0.432608	1 vs 2	0.741711	NS or Estimate < 0.5
UFD1	0.0342703	0.757705	0.045229	0.966093	0.0149812	1 vs 2	0.989644	NS or Estimate < 0.5
FAM102A	0.547952	0.226024	2.42431	0.0724248	1.14011	1 vs 2	0.38963	NS or Estimate < 0.5
RPL38	2.28033	0.271692	8.39309	0.00110266	2.95756	1 vs 2	0.0658391	P < 0.05
RYR3	-0.748371	0.471405	-1.58753	0.187584	0.726804	1 vs 2	0.588781	NS or Estimate < 0.5
EXOC4	1.55393	0.683017	2.27509	0.085247	1.06932	1 vs 2	0.421296	NS or Estimate < 0.5
CYS1	0.0490683	0.560369	0.0875643	0.934431	0.0294525	1 vs 2	0.976921	NS or Estimate < 0.5
FAM220A	0.113283	0.811524	0.139593	0.895728	0.0478239	1 vs 2	0.964846	NS or Estimate < 0.5
ARL4A	1.42678	0.486923	2.9302	0.0428051	1.3685	1 vs 2	0.32804	P < 0.05
FOXK1	-0.415037	0.471405	-0.880427	0.428348	0.368203	1 vs 2	0.770426	NS or Estimate < 0.5
ARL5A	0.810986	0.552519	1.4678	0.216068	0.665409	1 vs 2	0.625605	NS or Estimate < 0.5
ZNF829	-0.553383	0.386175	-1.43299	0.225147	0.647534	1 vs 2	0.636284	NS or Estimate < 0.5
GGPS1	-0.886717	0.662796	-1.33784	0.251943	0.598698	1 vs 2	0.653574	NS or Estimate < 0.5
EIF3B	1.6416	0.594554	2.76107	0.0507938	1.29419	1 vs 2	0.338038	NS or Estimate < 0.5
CMTM5	-1.41504	0.471405	-3.00175	0.0398732	1.39932	1 vs 2	0.320672	P < 0.05
TRIM16L	-0.22005	0.194988	-1.12853	0.322196	0.491879	1 vs 2	0.704759	NS or Estimate < 0.5
PDE4B	0.641604	0.993227	0.645979	0.553485	0.256895	1 vs 2	0.842116	NS or Estimate < 0.5
CDKL5	-0.553383	0.935761	-0.591373	0.586073	0.232048	1 vs 2	0.859116	NS or Estimate < 0.5
AGPAT3	-0.465705	0.610347	-0.763017	0.487971	0.311606	1 vs 2	0.815068	NS or Estimate < 0.5
SIL1	-1.30773	0.519141	-2.51902	0.0654248	1.18426	1 vs 2	0.3767	NS or Estimate < 0.5
BTF3	1.69885	0.38177	4.44992	0.0112474	1.94895	1 vs 2	0.193289	P < 0.05
PARL	1.30827	0.710137	1.84228	0.13923	0.856268	1 vs 2	0.522335	NS or Estimate < 0.5
EEF1B2	1.5172	0.21997	6.8973	0.00231686	2.6351	1 vs 2	0.0937898	P < 0.05
DEFB116	-0.805012	0.570297	-1.41157	0.230921	0.636537	1 vs 2	0.640203	NS or Estimate < 0.5
DEFB128	-0.610025	0.570297	-1.06966	0.345024	0.46215	1 vs 2	0.726429	NS or Estimate < 0.5
ZNF284	-0.340907	0.698118	-0.488322	0.650882	0.186498	1 vs 2	0.885372	NS or Estimate < 0.5
SLC38A10	-0.748371	0.563155	-1.32889	0.25462	0.594107	1 vs 2	0.653574	NS or Estimate < 0.5
SCNN1A	1.18741	0.824355	1.44042	0.223177	0.65135	1 vs 2	0.636284	NS or Estimate < 0.5
MARVELD2	0.163951	0.657374	0.249403	0.815333	0.0886651	1 vs 2	0.949535	NS or Estimate < 0.5
GOLGA6A	-0.591164	0.329425	-1.79453	0.147172	0.832176	1 vs 2	0.536881	NS or Estimate < 0.5
CDC42SE2	-0.0582411	0.18468	-0.315361	0.768255	0.114495	1 vs 2	0.933005	NS or Estimate < 0.5
CDC42SE1	0.284808	0.558748	0.509725	0.63708	0.195806	1 vs 2	0.884268	NS or Estimate < 0.5
PRPS2	0.584963	0.816497	0.71643	0.513329	0.289604	1 vs 2	0.820455	NS or Estimate < 0.5
ZNF718	0.497284	0.222566	2.23433	0.0891814	1.04973	1 vs 2	0.422381	NS or Estimate < 0.5
RGS21	-0.189014	0.799131	-0.236524	0.824645	0.0837331	1 vs 2	0.951003	NS or Estimate < 0.5
MRGPRE	-1.57899	0.710486	-2.22241	0.0903703	1.04397	1 vs 2	0.423476	NS or Estimate < 0.5
BOLA2B	-1.29632	0.664865	-1.94975	0.122992	0.910123	1 vs 2	0.492639	NS or Estimate < 0.5
ALG13	-0.85568	0.569757	-1.50183	0.20755	0.682877	1 vs 2	0.614631	NS or Estimate < 0.5
ATAD3C	-1.64106	0.552519	-2.97015	0.0411384	1.38575	1 vs 2	0.325522	P < 0.05
CEACAM16	-0.748371	0.333333	-2.24511	0.0881211	1.05492	1 vs 2	0.421296	NS or Estimate < 0.5
SLC25A29	0.367604	0.487641	0.753841	0.492889	0.307251	1 vs 2	0.815068	NS or Estimate < 0.5
ZBTB7C	0.608426	0.415663	1.46375	0.217105	0.66333	1 vs 2	0.627723	NS or Estimate < 0.5
ATP6V1E1	-1.52235	0.254244	-5.98773	0.00391177	2.40763	1 vs 2	0.120558	P < 0.05
SPATA6L	-1.47168	0.570297	-2.58055	0.0612918	1.2126	1 vs 2	0.363285	NS or Estimate < 0.5
SRSF5	0.891091	0.524888	1.69768	0.164803	0.783036	1 vs 2	0.56682	NS or Estimate < 0.5
THEMIS2	-0.415037	0.562843	-0.737395	0.501799	0.299471	1 vs 2	0.820455	NS or Estimate < 0.5
AREL1	0.163951	0.325571	0.503581	0.641025	0.193125	1 vs 2	0.884268	NS or Estimate < 0.5
ETNK1	0.584963	0.57735	1.01318	0.368278	0.433825	1 vs 2	0.741711	NS or Estimate < 0.5
FHL2	0.251629	0.666667	0.377444	0.725016	0.139652	1 vs 2	0.918424	NS or Estimate < 0.5
PRSS53	-0.22005	1.01073	-0.217714	0.838307	0.076597	1 vs 2	0.955283	NS or Estimate < 0.5
GK5	0.446617	0.694597	0.642987	0.555238	0.255521	1 vs 2	0.842838	NS or Estimate < 0.5
SEC14L1	0.553926	0.761817	0.727112	0.50743	0.294624	1 vs 2	0.820455	NS or Estimate < 0.5
CCNL2	1.39989	0.535305	2.61513	0.0591009	1.22841	1 vs 2	0.357381	NS or Estimate < 0.5
MAP9	-0.836049	0.638978	-1.30842	0.260849	0.583611	1 vs 2	0.663334	NS or Estimate < 0.5
USP9X	1.6416	0.360903	4.54861	0.0104286	1.98177	1 vs 2	0.18605	P < 0.05
SPAG8	-2.13835	0.513022	-4.16814	0.0140523	1.85225	1 vs 2	0.217674	P < 0.05
IAH1	-0.0250625	0.441867	-0.0567195	0.957489	0.0188663	1 vs 2	0.987386	NS or Estimate < 0.5
ZMYM5	0.251629	0.471405	0.533786	0.621773	0.206368	1 vs 2	0.875396	NS or Estimate < 0.5
SAPCD1	-0.85568	0.8781	-0.974468	0.385003	0.414536	1 vs 2	0.750281	NS or Estimate < 0.5
IL18BP	0.918296	0.333333	2.75489	0.0511171	1.29143	1 vs 2	0.338038	NS or Estimate < 0.5
TYW5	0.358939	0.335778	1.06898	0.345299	0.461804	1 vs 2	0.726429	NS or Estimate < 0.5
SNAPC3	-0.327359	0.604962	-0.541123	0.61715	0.209609	1 vs 2	0.875396	NS or Estimate < 0.5
ENTR1	-0.0620729	0.816263	-0.0760453	0.943035	0.0254723	1 vs 2	0.981035	NS or Estimate < 0.5
DEDD	0.446617	0.828134	0.539305	0.618294	0.208805	1 vs 2	0.875396	NS or Estimate < 0.5
ABHD18	-0.522347	0.519141	-1.00618	0.371258	0.430324	1 vs 2	0.741711	NS or Estimate < 0.5
CCNI2	-0.748371	0.333333	-2.24511	0.0881211	1.05492	1 vs 2	0.421296	NS or Estimate < 0.5
CDC42	1.90737	0.707606	2.69553	0.0543456	1.26484	1 vs 2	0.347527	NS or Estimate < 0.5
CHIC1	-2.13835	0.593694	-3.60176	0.0227225	1.64354	1 vs 2	0.260346	P < 0.05
IZUMO4	-1.85568	0.675248	-2.74815	0.0514724	1.28843	1 vs 2	0.339513	NS or Estimate < 0.5
GPX4	0.512432	0.620018	0.82648	0.45498	0.342008	1 vs 2	0.794649	NS or Estimate < 0.5
STRN4	0.0566417	1.00538	0.0563387	0.957774	0.018737	1 vs 2	0.987386	NS or Estimate < 0.5
FKRP	0.187414	0.638685	0.293438	0.783783	0.105804	1 vs 2	0.937326	NS or Estimate < 0.5
ZNF384	0.503258	0.728883	0.690452	0.527885	0.277461	1 vs 2	0.826495	NS or Estimate < 0.5
MESP2	-0.0250625	0.995944	-0.0251646	0.981129	0.00827386	1 vs 2	0.991665	NS or Estimate < 0.5
MEOX1	-1.47168	0.782596	-1.88051	0.133203	0.875487	1 vs 2	0.510815	NS or Estimate < 0.5
TCERG1	-0.610025	0.609388	-1.00105	0.373452	0.427765	1 vs 2	0.741711	NS or Estimate < 0.5
SWI5	-0.415037	0.275754	-1.5051	0.20675	0.684554	1 vs 2	0.613818	NS or Estimate < 0.5
FAM3C	-2.11262	0.294604	-7.17105	0.00200224	2.69848	1 vs 2	0.086844	P < 0.05
ARL16	-0.145919	0.619962	-0.235368	0.825482	0.0832923	1 vs 2	0.951003	NS or Estimate < 0.5
C8orf74	0.987113	0.876124	1.12668	0.322893	0.490942	1 vs 2	0.704759	NS or Estimate < 0.5
MAPK3	-0.415037	0.471405	-0.880427	0.428348	0.368203	1 vs 2	0.770426	NS or Estimate < 0.5
FAM133B	-0.0310365	0.475018	-0.0653374	0.95104	0.021801	1 vs 2	0.984695	NS or Estimate < 0.5
MUC17	-0.438501	1.04286	-0.420481	0.695741	0.157553	1 vs 2	0.911501	NS or Estimate < 0.5
NRF1	-0.85568	0.440643	-1.94189	0.124107	0.906202	1 vs 2	0.492878	NS or Estimate < 0.5
MYH11	2.81438	0.337741	8.33296	0.00113336	2.94563	1 vs 2	0.0663855	P < 0.05
ARAP1	-0.415037	0.745356	-0.556831	0.607326	0.216578	1 vs 2	0.872444	NS or Estimate < 0.5
PALM	-0.886717	1.00538	-0.881973	0.427604	0.368958	1 vs 2	0.770426	NS or Estimate < 0.5
ACTR3B	-0.290239	0.889037	-0.326464	0.76044	0.118935	1 vs 2	0.929286	NS or Estimate < 0.5
CHTF8	0.887259	0.508471	1.74496	0.155932	0.807065	1 vs 2	0.548432	NS or Estimate < 0.5
SERPINB7	-0.415037	0.944235	-0.439549	0.682967	0.1656	1 vs 2	0.902248	NS or Estimate < 0.5
PEG10	1.02561	0.440643	2.32752	0.0804704	1.09436	1 vs 2	0.415318	NS or Estimate < 0.5
HTR4	-0.717334	0.601618	-1.19234	0.299026	0.524291	1 vs 2	0.69285	NS or Estimate < 0.5
AKR1E2	-0.0938795	0.514149	-0.182592	0.863999	0.0634867	1 vs 2	0.959273	NS or Estimate < 0.5
CLDND1	0.163951	0.54862	0.298843	0.779943	0.107937	1 vs 2	0.936734	NS or Estimate < 0.5
ZNF765	-0.573015	0.578586	-0.99037	0.378055	0.422445	1 vs 2	0.744784	NS or Estimate < 0.5
TYSND1	1.22059	0.831212	1.46845	0.215902	0.665743	1 vs 2	0.625504	NS or Estimate < 0.5
PRDM15	0.553926	0.75751	0.731246	0.50516	0.296571	1 vs 2	0.820455	NS or Estimate < 0.5
U2AF1L4	-0.138346	0.739906	-0.186978	0.860779	0.0651084	1 vs 2	0.957042	NS or Estimate < 0.5
COA3	-0.132372	0.618764	-0.21393	0.841064	0.0751707	1 vs 2	0.955342	NS or Estimate < 0.5
YARS2	1.55393	0.587414	2.64537	0.0572583	1.24216	1 vs 2	0.356447	NS or Estimate < 0.5
MAPK8IP3	-0.415037	0.471405	-0.880427	0.428348	0.368203	1 vs 2	0.770426	NS or Estimate < 0.5
ZBTB8A	-0.415037	0.654411	-0.634215	0.560399	0.251503	1 vs 2	0.844009	NS or Estimate < 0.5
PHF11	0.0256052	0.863802	0.0296425	0.977772	0.0097623	1 vs 2	0.990381	NS or Estimate < 0.5
ASB1	-1.80501	0.752556	-2.39851	0.0744767	1.12798	1 vs 2	0.398581	NS or Estimate < 0.5
RUFY1	0.692272	0.69061	1.00241	0.372869	0.428444	1 vs 2	0.741711	NS or Estimate < 0.5
SLC26A6	-1.01749	0.619962	-1.64121	0.176098	0.754247	1 vs 2	0.577983	NS or Estimate < 0.5
SIDT2	0.163951	0.289	0.567305	0.60083	0.221248	1 vs 2	0.872036	NS or Estimate < 0.5
RHBDD2	0.604594	0.222566	2.71647	0.0531801	1.27425	1 vs 2	0.345234	NS or Estimate < 0.5
ERAP1	1.3824	0.407156	3.39526	0.0273967	1.5623	1 vs 2	0.28734	P < 0.05
NCALD	0.94745	0.780897	1.21328	0.291766	0.534965	1 vs 2	0.687711	NS or Estimate < 0.5
CRCP	-0.22005	0.570297	-0.385852	0.71925	0.14312	1 vs 2	0.918424	NS or Estimate < 0.5
ACP1	0.251629	0.502143	0.501111	0.642614	0.19205	1 vs 2	0.884268	NS or Estimate < 0.5
ZXDC	-0.276692	0.654411	-0.42281	0.694174	0.158532	1 vs 2	0.910029	NS or Estimate < 0.5
TTC23	-0.748371	0.702318	-1.06557	0.346663	0.460092	1 vs 2	0.726429	NS or Estimate < 0.5
GAGE1	-0.243513	0.890526	-0.273449	0.798047	0.0979715	1 vs 2	0.944342	NS or Estimate < 0.5
INCENP	0.251629	0.502143	0.501111	0.642614	0.19205	1 vs 2	0.884268	NS or Estimate < 0.5
UEVLD	-0.22005	0.570297	-0.385852	0.71925	0.14312	1 vs 2	0.918424	NS or Estimate < 0.5
KIAA0895L	0.77995	0.321364	2.427	0.0722148	1.14137	1 vs 2	0.389184	NS or Estimate < 0.5
GDAP1	-0.748371	0.666667	-1.12256	0.32445	0.488852	1 vs 2	0.704759	NS or Estimate < 0.5
ABCE1	0.928212	0.844332	1.09934	0.333338	0.477116	1 vs 2	0.714541	NS or Estimate < 0.5
RALGDS	-0.471679	0.570297	-0.827077	0.454678	0.342296	1 vs 2	0.794649	NS or Estimate < 0.5
RO60	0.748914	0.6037	1.24054	0.282568	0.548877	1 vs 2	0.679596	NS or Estimate < 0.5
PREPL	0.77995	0.441867	1.76512	0.152303	0.81729	1 vs 2	0.542994	NS or Estimate < 0.5
PPP4R1	0.113283	0.290061	0.39055	0.716037	0.145064	1 vs 2	0.918424	NS or Estimate < 0.5
ANKZF1	-0.553383	0.349508	-1.58332	0.188518	0.724648	1 vs 2	0.589801	NS or Estimate < 0.5
CYLD	0.748914	0.414074	1.80864	0.144775	0.839306	1 vs 2	0.532488	NS or Estimate < 0.5
ZNF596	-0.307728	0.674252	-0.4564	0.671785	0.172769	1 vs 2	0.899214	NS or Estimate < 0.5
RUFY2	0.308271	0.694597	0.443813	0.680129	0.167409	1 vs 2	0.902248	NS or Estimate < 0.5
CAST	-0.189014	0.552519	-0.342094	0.749498	0.125229	1 vs 2	0.921926	NS or Estimate < 0.5
TGFB1I1	-0.65586	0.480866	-1.36391	0.244302	0.612073	1 vs 2	0.646246	NS or Estimate < 0.5
TMEM80	1.22059	0.313635	3.89177	0.0176641	1.75291	1 vs 2	0.234988	P < 0.05
SUMF2	-0.189014	0.701234	-0.269544	0.800845	0.0964517	1 vs 2	0.9458	NS or Estimate < 0.5
GSDMB	0.854081	0.636991	1.3408	0.251063	0.600217	1 vs 2	0.653095	NS or Estimate < 0.5
ACBD5	0.748914	0.414074	1.80864	0.144775	0.839306	1 vs 2	0.532488	NS or Estimate < 0.5
DEFA1B	1.30827	0.823075	1.58949	0.187152	0.727806	1 vs 2	0.588781	NS or Estimate < 0.5
LGALS7B	-0.610025	0.624687	-0.976529	0.384096	0.41556	1 vs 2	0.749312	NS or Estimate < 0.5
C2orf88	1.3824	0.759306	1.82061	0.142775	0.845346	1 vs 2	0.528079	NS or Estimate < 0.5
RIOX2	-0.0250625	0.609388	-0.0411273	0.969165	0.0136021	1 vs 2	0.989644	NS or Estimate < 0.5
NCBP2	-1.01749	0.461445	-2.20501	0.0921369	1.03557	1 vs 2	0.423482	NS or Estimate < 0.5
EIF4G2	1.09091	0.439005	2.48496	0.0678494	1.16845	1 vs 2	0.383075	NS or Estimate < 0.5
CHD2	0.752463	0.770629	0.976427	0.384141	0.415509	1 vs 2	0.749312	NS or Estimate < 0.5
SNUPN	0.641604	0.77235	0.830717	0.452842	0.344054	1 vs 2	0.794581	NS or Estimate < 0.5
ERBB4	-0.522347	0.552519	-0.945392	0.39799	0.400128	1 vs 2	0.75524	NS or Estimate < 0.5
SNX21	0.553926	0.373795	1.4819	0.212497	0.672647	1 vs 2	0.620148	NS or Estimate < 0.5
NGDN	-0.660693	0.608713	-1.08539	0.338786	0.470075	1 vs 2	0.721404	NS or Estimate < 0.5
SHPRH	-0.465705	0.825573	-0.564099	0.602814	0.219817	1 vs 2	0.872444	NS or Estimate < 0.5
IQCJ	-0.415037	0.471405	-0.880427	0.428348	0.368203	1 vs 2	0.770426	NS or Estimate < 0.5
GTPBP10	-0.0817042	0.702318	-0.116335	0.912994	0.0395322	1 vs 2	0.969142	NS or Estimate < 0.5
NECTIN2	0.692272	0.254244	2.72286	0.0528307	1.27711	1 vs 2	0.344271	NS or Estimate < 0.5
SEC24B	-0.123548	0.869612	-0.142072	0.893891	0.0487152	1 vs 2	0.96482	NS or Estimate < 0.5
STAG2	1.36846	0.346471	3.94972	0.016822	1.77412	1 vs 2	0.228521	P < 0.05
CSKMT	-0.943358	0.68087	-1.38552	0.238143	0.623163	1 vs 2	0.64548	NS or Estimate < 0.5
ELMSAN1	-1.03104	0.802378	-1.28498	0.268161	0.571605	1 vs 2	0.669978	NS or Estimate < 0.5
TPM3	0.475667	0.301404	1.57817	0.189666	0.722011	1 vs 2	0.591535	NS or Estimate < 0.5
SLC6A3	-1.41504	0.471405	-3.00175	0.0398732	1.39932	1 vs 2	0.320672	P < 0.05
NUTM2G	-0.327359	0.558826	-0.585798	0.58947	0.229538	1 vs 2	0.861391	NS or Estimate < 0.5
SLC12A2	1.81844	0.413045	4.40253	0.0116682	1.933	1 vs 2	0.196499	P < 0.05
SRD5A1	-0.886717	0.765167	-1.15885	0.310986	0.507259	1 vs 2	0.704576	NS or Estimate < 0.5
DPH3	-0.886717	0.646118	-1.37238	0.241871	0.616416	1 vs 2	0.64548	NS or Estimate < 0.5
SST	-0.748371	0.333333	-2.24511	0.0881211	1.05492	1 vs 2	0.421296	NS or Estimate < 0.5
PHACTR4	-0.576846	0.75118	-0.76792	0.485358	0.313938	1 vs 2	0.813449	NS or Estimate < 0.5
CLCC1	1.02561	0.648221	1.58219	0.188771	0.724066	1 vs 2	0.589801	NS or Estimate < 0.5
DBNDD2	1.15638	0.755462	1.53069	0.200595	0.69768	1 vs 2	0.606986	NS or Estimate < 0.5
UBL5	1.3824	0.457566	3.02121	0.0391168	1.40764	1 vs 2	0.320672	P < 0.05
SMIM15	0.918296	0.881917	1.04125	0.356555	0.447874	1 vs 2	0.737972	NS or Estimate < 0.5
SSTR4	-0.479253	0.552414	-0.86756	0.434583	0.361928	1 vs 2	0.776164	NS or Estimate < 0.5
SULT1A2	-0.610025	0.441867	-1.38056	0.239542	0.620619	1 vs 2	0.64548	NS or Estimate < 0.5
TBXAS1	-0.660693	0.661452	-0.998852	0.374394	0.426671	1 vs 2	0.741711	NS or Estimate < 0.5
TKT	-0.0817042	0.502143	-0.162711	0.878635	0.0561914	1 vs 2	0.962053	NS or Estimate < 0.5
TNFRSF1A	0.497284	1.07557	0.462346	0.667863	0.175312	1 vs 2	0.898828	NS or Estimate < 0.5
TNFRSF1B	0.113283	0.570297	0.198639	0.852233	0.0694419	1 vs 2	0.955342	NS or Estimate < 0.5
TOP2B	0.974938	0.584971	1.66664	0.170913	0.767224	1 vs 2	0.575862	NS or Estimate < 0.5
TUBB2A	0.200961	0.242478	0.828783	0.453816	0.34312	1 vs 2	0.794649	NS or Estimate < 0.5
TUBG1	0.0566417	0.765167	0.0740252	0.944544	0.0247776	1 vs 2	0.981035	NS or Estimate < 0.5
MZT1	0.520747	0.718936	0.724331	0.508961	0.293316	1 vs 2	0.820455	NS or Estimate < 0.5
UGT2B11	-1.52235	0.916847	-1.66042	0.172168	0.764048	1 vs 2	0.575862	NS or Estimate < 0.5
MOCS1	0.308271	0.727035	0.424011	0.693367	0.159037	1 vs 2	0.910029	NS or Estimate < 0.5
UGT2B15	-0.327359	0.68796	-0.475841	0.659011	0.181107	1 vs 2	0.890876	NS or Estimate < 0.5
LYRM9	-0.906348	0.488812	-1.85419	0.137322	0.86226	1 vs 2	0.519431	NS or Estimate < 0.5
ZNF391	1.51208	0.616177	2.45397	0.0701446	1.15401	1 vs 2	0.387215	NS or Estimate < 0.5
SLC7A6	-0.0817042	0.333333	-0.245112	0.818431	0.087018	1 vs 2	0.949535	NS or Estimate < 0.5
QSER1	1.74891	0.443189	3.9462	0.0168717	1.77284	1 vs 2	0.228674	P < 0.05
METTL9	0.692272	0.613131	1.12908	0.321993	0.492154	1 vs 2	0.704759	NS or Estimate < 0.5
CDC14B	0.748914	0.710486	1.05409	0.351304	0.454317	1 vs 2	0.731664	NS or Estimate < 0.5
FSCN2	-0.535894	0.759655	-0.705445	0.519448	0.284458	1 vs 2	0.823495	NS or Estimate < 0.5
MYH14	0.358939	0.226024	1.58806	0.187469	0.72707	1 vs 2	0.588781	NS or Estimate < 0.5
HS6ST2	-0.415037	0.942809	-0.440214	0.682525	0.165882	1 vs 2	0.902248	NS or Estimate < 0.5
ZNF436	-1.80501	0.194988	-9.25707	0.000757189	3.1208	1 vs 2	0.0550675	P < 0.05
ATG9A	-1.18901	0.503075	-2.36349	0.0773676	1.11144	1 vs 2	0.405184	NS or Estimate < 0.5
SPPL2B	0.584963	0.602709	0.970555	0.386729	0.412593	1 vs 2	0.75087	NS or Estimate < 0.5
UBXN11	0.269778	0.855825	0.315226	0.76835	0.114441	1 vs 2	0.933005	NS or Estimate < 0.5
WIPF1	0.715735	0.569019	1.25784	0.276873	0.55772	1 vs 2	0.675893	NS or Estimate < 0.5
ZNF682	-0.0582411	0.943209	-0.0617478	0.953726	0.0205764	1 vs 2	0.986381	NS or Estimate < 0.5
DPH5	-0.415037	0.562843	-0.737395	0.501799	0.299471	1 vs 2	0.820455	NS or Estimate < 0.5
TMEM231	0.918296	0.909166	1.01004	0.369611	0.432255	1 vs 2	0.741711	NS or Estimate < 0.5
ZNF586	0.389975	0.660763	0.590189	0.586794	0.231515	1 vs 2	0.859231	NS or Estimate < 0.5
BCLAF1	0.358939	0.503075	0.71349	0.514961	0.288225	1 vs 2	0.820455	NS or Estimate < 0.5
TSEN34	0.692272	0.258131	2.68186	0.0551217	1.25868	1 vs 2	0.348799	NS or Estimate < 0.5
SLC38A1	-0.0250625	0.796421	-0.0314689	0.976403	0.0103708	1 vs 2	0.990381	NS or Estimate < 0.5
KLK5	0.692272	1.19654	0.578563	0.593898	0.226288	1 vs 2	0.864908	NS or Estimate < 0.5
NFKB2	-1.384	0.615495	-2.2486	0.0877813	1.0566	1 vs 2	0.421296	NS or Estimate < 0.5
FAM222B	1.52075	0.452704	3.35925	0.0283244	1.54784	1 vs 2	0.289157	P < 0.05
SLC39A7	-0.22005	0.546134	-0.402923	0.707611	0.150205	1 vs 2	0.918096	NS or Estimate < 0.5
UBXN2B	0.0566417	0.290061	0.195275	0.854696	0.0681885	1 vs 2	0.956727	NS or Estimate < 0.5
VPS37D	-0.641061	0.675248	-0.949372	0.396191	0.402096	1 vs 2	0.75524	NS or Estimate < 0.5
APH1A	1.22059	0.395742	3.08431	0.036777	1.43442	1 vs 2	0.31112	P < 0.05
TNFAIP8	-0.0817042	0.349508	-0.233769	0.826641	0.0826831	1 vs 2	0.951003	NS or Estimate < 0.5
SMCO1	-0.943358	0.360903	-2.61389	0.0591779	1.22784	1 vs 2	0.357381	NS or Estimate < 0.5
ALG9	0.799581	0.607203	1.31683	0.258272	0.587922	1 vs 2	0.659815	NS or Estimate < 0.5
MIER1	-0.384001	0.847768	-0.452955	0.674063	0.1713	1 vs 2	0.900094	NS or Estimate < 0.5
RGPD2	-0.138346	1.0372	-0.133384	0.900331	0.0455978	1 vs 2	0.967399	NS or Estimate < 0.5
RTL8C	1.60759	0.818637	1.96374	0.121035	0.91709	1 vs 2	0.488227	NS or Estimate < 0.5
RTL8A	-1.0817	0.502143	-2.15418	0.0975236	1.01089	1 vs 2	0.434969	NS or Estimate < 0.5
ASAH2B	0.358939	0.574509	0.624774	0.56599	0.247191	1 vs 2	0.847088	NS or Estimate < 0.5
KTN1	-0.849225	1.7447	-0.486745	0.651906	0.185815	1 vs 2	0.886648	NS or Estimate < 0.5
TRAPPC6B	-0.307728	0.771332	-0.398957	0.710307	0.148554	1 vs 2	0.918424	NS or Estimate < 0.5
HNRNPUL2	1.11328	0.360903	3.08472	0.0367625	1.4346	1 vs 2	0.31112	P < 0.05
TMTC4	-1.32736	0.527543	-2.51612	0.0656278	1.18291	1 vs 2	0.377433	NS or Estimate < 0.5
FNDC3A	1.18741	0.306316	3.87643	0.0178954	1.74726	1 vs 2	0.236229	P < 0.05
KIAA1191	-0.0817042	0.624894	-0.130749	0.902286	0.0446557	1 vs 2	0.968035	NS or Estimate < 0.5
N4BP2L1	-0.22005	0.850057	-0.258865	0.808515	0.092312	1 vs 2	0.949535	NS or Estimate < 0.5
PGA3	-0.438501	0.380561	-1.15225	0.313397	0.503905	1 vs 2	0.704759	NS or Estimate < 0.5
XIRP2	0.220593	0.692531	0.318531	0.766021	0.11576	1 vs 2	0.933005	NS or Estimate < 0.5
CLRN2	0.113283	0.995944	0.113745	0.914921	0.0386166	1 vs 2	0.970385	NS or Estimate < 0.5
OCIAD1	-0.576846	0.289724	-1.99102	0.117314	0.930651	1 vs 2	0.479241	NS or Estimate < 0.5
CASZ1	0.209786	0.885506	0.23691	0.824365	0.0838806	1 vs 2	0.951003	NS or Estimate < 0.5
DBI	-0.358396	0.488156	-0.734183	0.503552	0.297956	1 vs 2	0.820455	NS or Estimate < 0.5
BCS1L	0.925752	0.613834	1.50815	0.206008	0.686117	1 vs 2	0.613818	NS or Estimate < 0.5
CUL4B	1.18741	0.228909	5.18727	0.00657335	2.18221	1 vs 2	0.152389	P < 0.05
VAV3	0.456532	0.71601	0.637606	0.5584	0.253055	1 vs 2	0.844009	NS or Estimate < 0.5
RASA4	-0.186871	0.592796	-0.315237	0.768342	0.114445	1 vs 2	0.933005	NS or Estimate < 0.5
PRKD2	0.187414	1.02519	0.182809	0.86384	0.0635668	1 vs 2	0.959199	NS or Estimate < 0.5
OR7E24	0.766403	0.204131	3.75447	0.0198699	1.70181	1 vs 2	0.244095	P < 0.05
LDB3	0.00597397	0.638978	0.00934925	0.992988	0.00305592	1 vs 2	0.995259	NS or Estimate < 0.5
CT47A10	0.0898202	0.602279	0.149134	0.888665	0.051262	1 vs 2	0.963485	NS or Estimate < 0.5
ECPAS	0.818442	0.726566	1.12645	0.322979	0.490825	1 vs 2	0.704759	NS or Estimate < 0.5
PLIN4	-0.717334	0.532671	-1.34667	0.249329	0.603228	1 vs 2	0.653095	NS or Estimate < 0.5
PPM1N	0.974938	0.624687	1.56068	0.193619	0.713052	1 vs 2	0.596242	NS or Estimate < 0.5
ZNF99	-0.0817042	0.349508	-0.233769	0.826641	0.0826831	1 vs 2	0.951003	NS or Estimate < 0.5
U2SURP	1.50326	0.79473	1.89153	0.131518	0.881016	1 vs 2	0.509308	NS or Estimate < 0.5
DLGAP3	0.974938	0.948512	1.02786	0.362106	0.441165	1 vs 2	0.741711	NS or Estimate < 0.5
UNK	0.0566417	0.502143	0.1128	0.915624	0.0382831	1 vs 2	0.970829	NS or Estimate < 0.5
KDM6B	0.113283	0.624894	0.181284	0.86496	0.063004	1 vs 2	0.959633	NS or Estimate < 0.5
SLC45A4	-1.0817	0.666667	-1.62256	0.180005	0.744716	1 vs 2	0.581153	NS or Estimate < 0.5
FTO	-0.36437	0.353379	-1.0311	0.360755	0.442788	1 vs 2	0.741711	NS or Estimate < 0.5
LMTK3	-0.929811	0.920965	-1.00961	0.369797	0.432037	1 vs 2	0.741711	NS or Estimate < 0.5
IGSF5	-0.22005	0.624687	-0.352256	0.742422	0.129349	1 vs 2	0.920156	NS or Estimate < 0.5
SERPINA11	-1.41504	0.745356	-1.89847	0.130469	0.884494	1 vs 2	0.506583	NS or Estimate < 0.5
GPR108	-1.0817	0.471405	-2.29464	0.0834296	1.07868	1 vs 2	0.418974	NS or Estimate < 0.5
INTS1	0.113283	0.528321	0.214421	0.840706	0.0753559	1 vs 2	0.955342	NS or Estimate < 0.5
MYO5B	0.132915	0.515692	0.25774	0.809324	0.0918774	1 vs 2	0.949535	NS or Estimate < 0.5
FBXO46	0.358939	0.750513	0.478258	0.657432	0.182149	1 vs 2	0.890876	NS or Estimate < 0.5
PLEKHM3	1.35894	0.701234	1.93792	0.124674	0.904222	1 vs 2	0.494557	NS or Estimate < 0.5
TENM3	0.113283	0.386175	0.293347	0.783847	0.105769	1 vs 2	0.937326	NS or Estimate < 0.5
ARHGEF28	1.30827	0.386175	3.38777	0.0275868	1.5593	1 vs 2	0.28734	P < 0.05
MBOAT1	-0.471679	0.570297	-0.827077	0.454678	0.342296	1 vs 2	0.794649	NS or Estimate < 0.5
AJM1	-1.52235	0.258131	-5.89758	0.00413507	2.38352	1 vs 2	0.121335	P < 0.05
PABPN1L	-1.47168	0.570297	-2.58055	0.0612918	1.2126	1 vs 2	0.363285	NS or Estimate < 0.5
PRSS54	-1.18901	0.773976	-1.53624	0.199285	0.700526	1 vs 2	0.604089	NS or Estimate < 0.5
ZNF823	-0.85568	0.675248	-1.26721	0.273834	0.562512	1 vs 2	0.672794	NS or Estimate < 0.5
TNRC18	0.0256052	1.14082	0.0224445	0.983168	0.0073721	1 vs 2	0.992967	NS or Estimate < 0.5
RGP1	-0.0817042	0.471405	-0.173321	0.870817	0.0600733	1 vs 2	0.959864	NS or Estimate < 0.5
MEGF9	-0.327359	0.610347	-0.53635	0.620156	0.207499	1 vs 2	0.875396	NS or Estimate < 0.5
CCDC159	-0.748371	0.333333	-2.24511	0.0881211	1.05492	1 vs 2	0.421296	NS or Estimate < 0.5
TBX18	-0.276692	1.02806	-0.26914	0.801134	0.0962948	1 vs 2	0.945815	NS or Estimate < 0.5
TSPAN11	-2	0.870307	-2.29804	0.0831182	1.0803	1 vs 2	0.418974	NS or Estimate < 0.5
SETD5	0.663976	1.03494	0.641562	0.556074	0.254868	1 vs 2	0.843751	NS or Estimate < 0.5
RASSF10	1.90081	0.627002	3.03158	0.0387206	1.41206	1 vs 2	0.318638	P < 0.05
WIPF3	0.836592	0.457015	1.83055	0.141137	0.85036	1 vs 2	0.526698	NS or Estimate < 0.5
C4orf51	-2.384	0.490396	-4.86138	0.00827104	2.08244	1 vs 2	0.167212	P < 0.05
UNC119B	-0.22005	0.779301	-0.282368	0.791669	0.101456	1 vs 2	0.940806	NS or Estimate < 0.5
UNC13C	-1.0817	0.806521	-1.3412	0.250947	0.600419	1 vs 2	0.653095	NS or Estimate < 0.5
AKR1B15	0.163951	0.509054	0.32207	0.763529	0.117174	1 vs 2	0.931067	NS or Estimate < 0.5
MGA	0.0256052	0.640555	0.0399735	0.97003	0.0132149	1 vs 2	0.989644	NS or Estimate < 0.5
ZNF799	2.69973	0.442814	6.09675	0.00366117	2.43638	1 vs 2	0.116409	P < 0.05
TMEM120B	-0.502716	0.68796	-0.730734	0.505441	0.29633	1 vs 2	0.820455	NS or Estimate < 0.5
DMRTC1B	0.200961	0.443189	0.453444	0.673739	0.171508	1 vs 2	0.899871	NS or Estimate < 0.5
PXN	0.0822469	1.01952	0.0806721	0.939578	0.0270672	1 vs 2	0.979045	NS or Estimate < 0.5
JMJD6	0.358939	0.552519	0.64964	0.551345	0.258577	1 vs 2	0.841121	NS or Estimate < 0.5
THOC2	-0.22005	0.546134	-0.402923	0.707611	0.150205	1 vs 2	0.918096	NS or Estimate < 0.5
SPAG11A	-2.14717	0.573318	-3.74516	0.020031	1.6983	1 vs 2	0.244944	P < 0.05
ELN	-0.276692	0.540647	-0.511778	0.635765	0.196703	1 vs 2	0.884268	NS or Estimate < 0.5
ACD	-0.22005	0.624687	-0.352256	0.742422	0.129349	1 vs 2	0.920156	NS or Estimate < 0.5
NKAPD1	0.146462	0.530028	0.276329	0.795986	0.0990948	1 vs 2	0.942914	NS or Estimate < 0.5
GPD2	0.446617	0.462739	0.96516	0.389121	0.409916	1 vs 2	0.75087	NS or Estimate < 0.5
ZNF133	1.22059	0.53644	2.27536	0.0852222	1.06945	1 vs 2	0.421296	NS or Estimate < 0.5
FAM86B1	-0.22005	0.354702	-0.62038	0.568606	0.245189	1 vs 2	0.84927	NS or Estimate < 0.5
RABEP1	0.0566417	0.823075	0.0688172	0.948438	0.0229911	1 vs 2	0.982892	NS or Estimate < 0.5
NARF	-0.415037	0.639823	-0.648675	0.551908	0.258133	1 vs 2	0.841121	NS or Estimate < 0.5
RB1CC1	1.35894	0.457693	2.9691	0.0411809	1.3853	1 vs 2	0.325522	P < 0.05
STRN3	0.0626156	0.587238	0.106627	0.920218	0.0361091	1 vs 2	0.971944	NS or Estimate < 0.5
GP6	-0.85568	0.826669	-1.03509	0.359097	0.444788	1 vs 2	0.741711	NS or Estimate < 0.5
BANK1	-0.660693	0.75201	-0.878569	0.429244	0.367296	1 vs 2	0.771227	NS or Estimate < 0.5
ADGRA1	-0.85568	0.726291	-1.17815	0.304041	0.517068	1 vs 2	0.698395	NS or Estimate < 0.5
WBP1L	1.30827	0.823075	1.58949	0.187152	0.727806	1 vs 2	0.588781	NS or Estimate < 0.5
ZNF655	0.113283	0.528321	0.214421	0.840706	0.0753559	1 vs 2	0.955342	NS or Estimate < 0.5
TCF4	-0.276692	0.386175	-0.716493	0.513294	0.289634	1 vs 2	0.820455	NS or Estimate < 0.5
PLOD3	-0.479253	0.688519	-0.696062	0.524716	0.280076	1 vs 2	0.826001	NS or Estimate < 0.5
DDTL	-0.0817042	0.919491	-0.088858	0.933466	0.0299016	1 vs 2	0.976921	NS or Estimate < 0.5
SERPINA3	0.220593	0.610156	0.361535	0.735988	0.133129	1 vs 2	0.920156	NS or Estimate < 0.5
MCC	-0.00757336	0.535305	-0.0141477	0.98939	0.00463264	1 vs 2	0.995259	NS or Estimate < 0.5
TMEM213	-0.969359	0.682999	-1.41927	0.228828	0.640491	1 vs 2	0.640203	NS or Estimate < 0.5
MYSM1	0.389975	0.546134	0.714065	0.514642	0.288495	1 vs 2	0.820455	NS or Estimate < 0.5
NDUFAF8	1.58496	0.777407	2.03878	0.111097	0.954296	1 vs 2	0.465132	NS or Estimate < 0.5
AAMP	-0.634379	0.464957	-1.36438	0.244166	0.612315	1 vs 2	0.646241	NS or Estimate < 0.5
ABCA3	-0.22005	0.624687	-0.352256	0.742422	0.129349	1 vs 2	0.920156	NS or Estimate < 0.5
ABCF1	0.584963	0.57735	1.01318	0.368278	0.433825	1 vs 2	0.741711	NS or Estimate < 0.5
ABR	-1.29632	0.294714	-4.39857	0.0117042	1.93166	1 vs 2	0.196499	P < 0.05
ACACB	1.30827	0.536169	2.44003	0.0712057	1.14749	1 vs 2	0.387948	NS or Estimate < 0.5
CCDC102B	0.0566417	0.386175	0.146674	0.890485	0.0503733	1 vs 2	0.963485	NS or Estimate < 0.5
TRAPPC13	-1.0817	0.510393	-2.11935	0.101416	0.993894	1 vs 2	0.441372	NS or Estimate < 0.5
MCRIP1	0.27126	0.313635	0.864893	0.435884	0.360629	1 vs 2	0.777086	NS or Estimate < 0.5
ASIC1	-0.886717	0.386175	-2.29615	0.083291	1.0794	1 vs 2	0.418974	NS or Estimate < 0.5
ACR	-1.0817	0.471405	-2.29464	0.0834296	1.07868	1 vs 2	0.418974	NS or Estimate < 0.5
SPRR3	0.220593	0.592958	0.372021	0.728748	0.137423	1 vs 2	0.918424	NS or Estimate < 0.5
SLC35G2	-0.0250625	0.570297	-0.0439464	0.967053	0.0145495	1 vs 2	0.989644	NS or Estimate < 0.5
GPR89A	-0.943358	0.22466	-4.19904	0.0137063	1.86308	1 vs 2	0.21458	P < 0.05
TMEM184A	-0.502716	0.610347	-0.823656	0.45641	0.340645	1 vs 2	0.794649	NS or Estimate < 0.5
ACO2	0.294724	0.384715	0.766083	0.486336	0.313064	1 vs 2	0.81426	NS or Estimate < 0.5
GPR18	-1.02506	0.570297	-1.79742	0.146678	0.833635	1 vs 2	0.53608	NS or Estimate < 0.5
HNRNPF	-0.0817042	0.78138	-0.104564	0.921755	0.0353844	1 vs 2	0.972911	NS or Estimate < 0.5
CTNNB1	2.99144	0.390799	7.65468	0.00156523	2.80542	1 vs 2	0.0769134	P < 0.05
HDAC7	-1.18901	0.590466	-2.01369	0.114317	0.941887	1 vs 2	0.473594	NS or Estimate < 0.5
DLG1	0.251629	0.881917	0.285321	0.789563	0.102613	1 vs 2	0.93959	NS or Estimate < 0.5
SMARCD2	0.358939	0.527739	0.680144	0.533742	0.272669	1 vs 2	0.829463	NS or Estimate < 0.5
GRSF1	0.918296	0.666667	1.37744	0.240426	0.619018	1 vs 2	0.64548	NS or Estimate < 0.5
SLC4A4	-0.0817042	0.546134	-0.149605	0.888317	0.0514322	1 vs 2	0.963485	NS or Estimate < 0.5
ZNF419	-0.0817042	0.518748	-0.157503	0.88248	0.0542953	1 vs 2	0.963485	NS or Estimate < 0.5
CHCHD4	0.77995	0.702318	1.11054	0.329024	0.482772	1 vs 2	0.709439	NS or Estimate < 0.5
PTPRJ	-0.717334	0.601618	-1.19234	0.299026	0.524291	1 vs 2	0.69285	NS or Estimate < 0.5
RAPGEF3	-0.22005	0.194988	-1.12853	0.322196	0.491879	1 vs 2	0.704759	NS or Estimate < 0.5
SIGLEC14	-0.748371	0.546134	-1.37031	0.242463	0.615354	1 vs 2	0.64548	NS or Estimate < 0.5
PUS7L	0.520747	0.580597	0.896917	0.420466	0.376269	1 vs 2	0.770426	NS or Estimate < 0.5
OBSCN	-2.8318	0.487999	-5.80289	0.00438669	2.35786	1 vs 2	0.124173	P < 0.05
RBM47	0.854081	0.896249	0.95295	0.394579	0.403866	1 vs 2	0.75524	NS or Estimate < 0.5
RNF169	-0.22005	0.441867	-0.498	0.644619	0.190697	1 vs 2	0.884268	NS or Estimate < 0.5
GTF2H2C	1.2878	0.405842	3.17316	0.0337554	1.47166	1 vs 2	0.305085	P < 0.05
BET1L	-0.415037	0.745356	-0.556831	0.607326	0.216578	1 vs 2	0.872444	NS or Estimate < 0.5
CEP78	-0.553383	0.510393	-1.08423	0.339244	0.469488	1 vs 2	0.72178	NS or Estimate < 0.5
C9orf129	-1.0817	0.333333	-3.24511	0.0315211	1.5014	1 vs 2	0.296992	P < 0.05
SEPTIN8	0.308271	0.386175	0.798267	0.469425	0.328434	1 vs 2	0.80105	NS or Estimate < 0.5
TMEM91	-0.610025	0.752556	-0.810604	0.463065	0.334358	1 vs 2	0.798602	NS or Estimate < 0.5
RAD51AP2	-0.0817042	0.349508	-0.233769	0.826641	0.0826831	1 vs 2	0.951003	NS or Estimate < 0.5
CCDC43	-0.684156	0.619962	-1.10354	0.331713	0.479237	1 vs 2	0.712007	NS or Estimate < 0.5
ZNF506	4.07616	0.785226	5.19106	0.00655626	2.18334	1 vs 2	0.152389	P < 0.05
ZBTB34	-0.00757336	0.963996	-0.00785621	0.994108	0.00256647	1 vs 2	0.995259	NS or Estimate < 0.5
TINF2	-1.71733	0.961272	-1.78652	0.148551	0.828124	1 vs 2	0.538729	NS or Estimate < 0.5
MROH1	0.163951	0.443189	0.369935	0.730185	0.136567	1 vs 2	0.918432	NS or Estimate < 0.5
NUTM2A	0.187414	0.461445	0.406147	0.705424	0.15155	1 vs 2	0.918096	NS or Estimate < 0.5
COMMD7	-1.41504	0.275754	-5.13152	0.00683129	2.1655	1 vs 2	0.154674	P < 0.05
SGCE	0.659093	0.799228	0.824662	0.4559	0.34113	1 vs 2	0.794649	NS or Estimate < 0.5
KAT6A	0.251629	0.806521	0.311993	0.770632	0.113153	1 vs 2	0.933005	NS or Estimate < 0.5
BCAS3	0.0256052	0.580929	0.0440763	0.966956	0.0145932	1 vs 2	0.989644	NS or Estimate < 0.5
ULK3	-1.0817	0.666667	-1.62256	0.180005	0.744716	1 vs 2	0.581153	NS or Estimate < 0.5
CPPED1	-0.0817042	0.333333	-0.245112	0.818431	0.087018	1 vs 2	0.949535	NS or Estimate < 0.5
LRRC58	-0.522347	0.776428	-0.672756	0.537968	0.269243	1 vs 2	0.832315	NS or Estimate < 0.5
NXF2	-0.507549	0.777783	-0.652559	0.549643	0.259919	1 vs 2	0.841121	NS or Estimate < 0.5
EIF5AL1	-0.276692	0.462739	-0.597944	0.582085	0.235013	1 vs 2	0.85702	NS or Estimate < 0.5
ZNF578	0.859772	0.377706	2.2763	0.0851334	1.0699	1 vs 2	0.421296	NS or Estimate < 0.5
RSPH10B2	0.0566417	0.290061	0.195275	0.854696	0.0681885	1 vs 2	0.956727	NS or Estimate < 0.5
FBXL19	-0.415037	0.433197	-0.958081	0.392277	0.406407	1 vs 2	0.754009	NS or Estimate < 0.5
ITPR1	0.766403	0.833986	0.918963	0.410116	0.387094	1 vs 2	0.76847	NS or Estimate < 0.5
PDS5A	2.13291	0.288193	7.40099	0.00177787	2.7501	1 vs 2	0.0841684	P < 0.05
SENP6	1.38494	0.807985	1.71407	0.161669	0.791373	1 vs 2	0.559415	NS or Estimate < 0.5
FAM184A	-0.132372	0.661452	-0.200123	0.851147	0.0699954	1 vs 2	0.955342	NS or Estimate < 0.5
DROSHA	1.02561	0.21852	4.69341	0.009354	2.029	1 vs 2	0.177243	P < 0.05
UBR7	-0.0817042	0.666667	-0.122556	0.908369	0.0417375	1 vs 2	0.968035	NS or Estimate < 0.5
REX1BD	-0.836049	0.638978	-1.30842	0.260849	0.583611	1 vs 2	0.663334	NS or Estimate < 0.5
SPATS2L	0.553926	0.507324	1.09186	0.336251	0.473337	1 vs 2	0.717046	NS or Estimate < 0.5
RAP1GDS1	0.446617	0.386175	1.15651	0.311838	0.50607	1 vs 2	0.704576	NS or Estimate < 0.5
VSIG4	-1.05067	0.592958	-1.77191	0.151103	0.820727	1 vs 2	0.542786	NS or Estimate < 0.5
PLEKHB2	-1.18901	0.527739	-2.25303	0.0873512	1.05873	1 vs 2	0.421296	NS or Estimate < 0.5
CXCL16	-0.358396	0.823075	-0.435435	0.685713	0.163858	1 vs 2	0.904666	NS or Estimate < 0.5
TMEM176B	-1.32736	0.222566	-5.9639	0.00396932	2.40128	1 vs 2	0.120558	P < 0.05
ZNF883	0.584963	0.745356	0.78481	0.47644	0.321992	1 vs 2	0.806102	NS or Estimate < 0.5
CCDC160	0.163951	1.07953	0.151873	0.886639	0.052253	1 vs 2	0.963485	NS or Estimate < 0.5
IGLON5	-0.943358	0.602709	-1.5652	0.19259	0.715366	1 vs 2	0.595037	NS or Estimate < 0.5
CLDN25	-1.27669	0.441867	-2.88931	0.0445937	1.35073	1 vs 2	0.328501	P < 0.05
CXXC1	0.641604	0.923883	0.694465	0.525616	0.279331	1 vs 2	0.826495	NS or Estimate < 0.5
NRDC	-0.643204	0.491787	-1.30789	0.26101	0.583342	1 vs 2	0.663509	NS or Estimate < 0.5
ACOX3	-1.22005	0.727035	-1.67812	0.168627	0.773073	1 vs 2	0.572306	NS or Estimate < 0.5
ZNF219	0.00597397	0.638978	0.00934925	0.992988	0.00305592	1 vs 2	0.995259	NS or Estimate < 0.5
SAMD12	0.918296	0.806521	1.13859	0.318438	0.496975	1 vs 2	0.704759	NS or Estimate < 0.5
FAM13B	1.00054	0.886265	1.12894	0.322042	0.492087	1 vs 2	0.704759	NS or Estimate < 0.5
ACTN1	1.9439	0.401968	4.83596	0.00842472	2.07444	1 vs 2	0.167714	P < 0.05
DGLUCY	0.339307	0.6113	0.555058	0.60843	0.215789	1 vs 2	0.872541	NS or Estimate < 0.5
FOXRED2	-1.27669	0.386175	-3.30599	0.0297659	1.52628	1 vs 2	0.296217	P < 0.05
TTI2	-0.85568	0.569757	-1.50183	0.20755	0.682877	1 vs 2	0.614631	NS or Estimate < 0.5
PCTP	-0.748371	0.593769	-1.26037	0.276048	0.559015	1 vs 2	0.675808	NS or Estimate < 0.5
RGS8	-1.94336	0.386175	-5.03232	0.0073215	2.1354	1 vs 2	0.158286	P < 0.05
AQP12B	-0.415037	0.57735	-0.718866	0.511979	0.290748	1 vs 2	0.820455	NS or Estimate < 0.5
IFT43	1.79958	0.755561	2.38178	0.0758422	1.12009	1 vs 2	0.401362	NS or Estimate < 0.5
COL6A6	0.446617	0.694597	0.642987	0.555238	0.255521	1 vs 2	0.842838	NS or Estimate < 0.5
SLC35G6	0.14432	0.720841	0.20021	0.851083	0.0700281	1 vs 2	0.955342	NS or Estimate < 0.5
ZNF554	-0.748371	0.666667	-1.12256	0.32445	0.488852	1 vs 2	0.704759	NS or Estimate < 0.5
ZNF836	-0.943358	1.14402	-0.824597	0.455933	0.341099	1 vs 2	0.794649	NS or Estimate < 0.5
RRAS2	-0.276692	0.993227	-0.278578	0.794377	0.0999735	1 vs 2	0.942605	NS or Estimate < 0.5
GIGYF2	0.497284	0.600328	0.828355	0.454033	0.342913	1 vs 2	0.794649	NS or Estimate < 0.5
PNMA8A	0.584963	0.745356	0.78481	0.47644	0.321992	1 vs 2	0.806102	NS or Estimate < 0.5
AADACL3	-0.502716	1.25722	-0.399863	0.70969	0.148931	1 vs 2	0.918424	NS or Estimate < 0.5
BICDL2	-1.12754	0.581417	-1.93929	0.124478	0.904906	1 vs 2	0.49416	NS or Estimate < 0.5
CNPY1	0.413438	0.516324	0.800734	0.468148	0.329617	1 vs 2	0.800779	NS or Estimate < 0.5
ACVR1	0.358939	0.701234	0.511867	0.635708	0.196742	1 vs 2	0.884268	NS or Estimate < 0.5
FBRS	-1.68364	0.384334	-4.38067	0.0118687	1.9256	1 vs 2	0.197874	P < 0.05
LAMA4	0.553926	1.06027	0.522437	0.628965	0.201374	1 vs 2	0.879677	NS or Estimate < 0.5
ASH2L	0.113283	0.239081	0.473828	0.660327	0.180241	1 vs 2	0.891663	NS or Estimate < 0.5
CORO1C	-0.522347	0.258131	-2.02357	0.113037	0.946781	1 vs 2	0.469995	NS or Estimate < 0.5
ARMC5	0.251629	0.546134	0.460746	0.668917	0.174627	1 vs 2	0.899186	NS or Estimate < 0.5
ZFYVE16	-1.29632	0.519141	-2.49705	0.0669771	1.17407	1 vs 2	0.380605	NS or Estimate < 0.5
SWT1	-1.22005	0.546134	-2.23398	0.0892163	1.04956	1 vs 2	0.422381	NS or Estimate < 0.5
NUDT19	0.77995	0.194988	4	0.0161301	1.79236	1 vs 2	0.22341	P < 0.05
HMX3	-1.62966	0.886279	-1.83876	0.139799	0.854495	1 vs 2	0.522908	NS or Estimate < 0.5
SOWAHD	-1.0817	0.883441	-1.22442	0.287974	0.540647	1 vs 2	0.684772	NS or Estimate < 0.5
LRRC30	-1.52235	0.771332	-1.97366	0.119667	0.922026	1 vs 2	0.485478	NS or Estimate < 0.5
TTC24	-2.22379	2.02404	-1.09869	0.333591	0.476785	1 vs 2	0.714789	NS or Estimate < 0.5
ACYP1	-0.415037	0.777407	-0.533874	0.621717	0.206407	1 vs 2	0.875396	NS or Estimate < 0.5
HECTD4	0.113283	0.386175	0.293347	0.783847	0.105769	1 vs 2	0.937326	NS or Estimate < 0.5
GSG1L	-0.610025	0.727035	-0.839059	0.448654	0.348088	1 vs 2	0.789257	NS or Estimate < 0.5
ZFP57	-0.994026	0.492685	-2.01757	0.113813	0.94381	1 vs 2	0.47213	NS or Estimate < 0.5
SYNPO	-0.869228	0.801293	-1.08478	0.339026	0.469766	1 vs 2	0.721467	NS or Estimate < 0.5
FAM160A1	0.553926	0.863801	0.641266	0.556248	0.254732	1 vs 2	0.843751	NS or Estimate < 0.5
ADAM10	0.0566417	0.570297	0.0993197	0.925663	0.0335471	1 vs 2	0.973785	NS or Estimate < 0.5
PRH2	-0.0817042	0.349508	-0.233769	0.826641	0.0826831	1 vs 2	0.951003	NS or Estimate < 0.5
TMEM87A	-0.465705	0.901757	-0.516442	0.632784	0.198744	1 vs 2	0.882975	NS or Estimate < 0.5
SLC35E2B	1.74891	0.584745	2.9909	0.0403023	1.39467	1 vs 2	0.321921	P < 0.05
MECP2	-0.294181	0.59781	-0.492097	0.648435	0.188133	1 vs 2	0.884504	NS or Estimate < 0.5
NAA16	-0.276692	0.823075	-0.336168	0.753639	0.122837	1 vs 2	0.923722	NS or Estimate < 0.5
ADAR	0.163951	0.742823	0.220713	0.836124	0.0777294	1 vs 2	0.953898	NS or Estimate < 0.5
NAV2	0.139284	1.03497	0.134578	0.899446	0.0460251	1 vs 2	0.966549	NS or Estimate < 0.5
NHLH2	-0.697703	0.395742	-1.76302	0.152677	0.816227	1 vs 2	0.542994	NS or Estimate < 0.5
ARHGEF25	-0.22005	0.639823	-0.343923	0.748223	0.125969	1 vs 2	0.921926	NS or Estimate < 0.5
DDX54	0.0801048	0.480438	0.166733	0.875669	0.0576598	1 vs 2	0.962053	NS or Estimate < 0.5
TASOR	-0.641061	0.701234	-0.91419	0.412338	0.384746	1 vs 2	0.769519	NS or Estimate < 0.5
TSTD1	1.54175	0.697958	2.20895	0.0917338	1.03747	1 vs 2	0.423476	NS or Estimate < 0.5
TEN1	-0.243513	0.851704	-0.285913	0.789141	0.102846	1 vs 2	0.93959	NS or Estimate < 0.5
TBC1D14	0.251629	0.333333	0.754888	0.492327	0.307747	1 vs 2	0.815068	NS or Estimate < 0.5
FER1L5	-0.522347	0.776428	-0.672756	0.537968	0.269243	1 vs 2	0.832315	NS or Estimate < 0.5
LDB1	0.818442	0.291595	2.80678	0.0484755	1.31448	1 vs 2	0.333644	P < 0.05
ARHGEF7	0.358939	0.625644	0.573711	0.596879	0.224113	1 vs 2	0.868133	NS or Estimate < 0.5
ZNF276	1.08225	0.765948	1.41295	0.230543	0.637247	1 vs 2	0.640203	NS or Estimate < 0.5
LIMA1	0.194988	0.570297	0.341905	0.74963	0.125153	1 vs 2	0.921926	NS or Estimate < 0.5
RNF180	0.220593	0.772822	0.285438	0.789479	0.102659	1 vs 2	0.93959	NS or Estimate < 0.5
ENTPD6	0.974938	0.497965	1.95785	0.121855	0.914155	1 vs 2	0.490382	NS or Estimate < 0.5
LSM14A	1.27723	0.401968	3.17746	0.033617	1.47344	1 vs 2	0.30486	P < 0.05
C1QC	0.308271	0.513022	0.600892	0.580302	0.236346	1 vs 2	0.85702	NS or Estimate < 0.5
SLC44A3	-0.660693	0.674252	-0.97989	0.382622	0.417231	1 vs 2	0.749312	NS or Estimate < 0.5
TTC22	0.113283	0.570297	0.198639	0.852233	0.0694419	1 vs 2	0.955342	NS or Estimate < 0.5
CTSC	-1.68416	0.619962	-2.71655	0.0531762	1.27428	1 vs 2	0.345234	NS or Estimate < 0.5
AEBP2	1.46625	0.402738	3.6407	0.0219511	1.65854	1 vs 2	0.254732	P < 0.05
CLCN7	0.672641	0.527543	1.27504	0.271318	0.566521	1 vs 2	0.669978	NS or Estimate < 0.5
TENT2	-0.886717	1.13098	-0.784023	0.476852	0.321616	1 vs 2	0.806173	NS or Estimate < 0.5
DHX36	1.29472	0.55661	2.32609	0.0805969	1.09368	1 vs 2	0.415318	NS or Estimate < 0.5
SZRD1	0.389975	0.441867	0.882562	0.427321	0.369246	1 vs 2	0.770426	NS or Estimate < 0.5
JMJD7	0.163951	0.742823	0.220713	0.836124	0.0777294	1 vs 2	0.953898	NS or Estimate < 0.5
FANCL	-0.169382	0.481857	-0.35152	0.742934	0.12905	1 vs 2	0.920156	NS or Estimate < 0.5
PRRT4	-0.553383	0.386175	-1.43299	0.225147	0.647534	1 vs 2	0.636284	NS or Estimate < 0.5
TMEM240	-1.0817	0.883441	-1.22442	0.287974	0.540647	1 vs 2	0.684772	NS or Estimate < 0.5
ENG	-0.943358	0.290061	-3.25228	0.0313083	1.50434	1 vs 2	0.296992	P < 0.05
ADCY8	-1.0817	0.502143	-2.15418	0.0975236	1.01089	1 vs 2	0.434969	NS or Estimate < 0.5
KANSL3	0.0342703	1.03819	0.0330095	0.975248	0.0108847	1 vs 2	0.99017	NS or Estimate < 0.5
WDR26	1.4789	0.586983	2.5195	0.0653916	1.18448	1 vs 2	0.3767	NS or Estimate < 0.5
ADCY9	0.937927	0.443189	2.11631	0.101764	0.992408	1 vs 2	0.441908	NS or Estimate < 0.5
ADCYAP1	-0.886717	0.694597	-1.27659	0.270824	0.567313	1 vs 2	0.669978	NS or Estimate < 0.5
ADD1	2.08225	0.0876781	23.7488	1.86411e-05	4.72953	1 vs 2	0.00797684	FDR < 0.05
ADD3	1.16395	0.443189	2.62631	0.0584116	1.2335	1 vs 2	0.357381	NS or Estimate < 0.5
PLIN2	0.113283	0.536169	0.211283	0.842994	0.0741753	1 vs 2	0.955342	NS or Estimate < 0.5
ABCD3	-0.307728	0.776428	-0.396338	0.712089	0.147466	1 vs 2	0.918424	NS or Estimate < 0.5
TENM2	0.477653	0.799131	0.597716	0.582223	0.23491	1 vs 2	0.85702	NS or Estimate < 0.5
PRR32	-0.276692	0.739906	-0.373955	0.727415	0.138217	1 vs 2	0.918424	NS or Estimate < 0.5
ZBTB37	-0.415037	0.816497	-0.508315	0.637984	0.19519	1 vs 2	0.884268	NS or Estimate < 0.5
SLC50A1	-0.189014	0.870307	-0.21718	0.838696	0.0763955	1 vs 2	0.955342	NS or Estimate < 0.5
NAPEPLD	-1.13835	0.928393	-1.22615	0.28739	0.541528	1 vs 2	0.684772	NS or Estimate < 0.5
GGT6	0.873712	0.617975	1.41383	0.230304	0.637698	1 vs 2	0.640203	NS or Estimate < 0.5
C1orf194	-0.415037	8.62956e-17	-4809486694493455	1.12139e-62	61.9502	1 vs 2	7.19792e-60	NS or Estimate < 0.5
RPTN	-2.1248	0.778983	-2.72766	0.0525699	1.27926	1 vs 2	0.343007	NS or Estimate < 0.5
ADK	0.433069	0.70795	0.611723	0.573781	0.241254	1 vs 2	0.853772	NS or Estimate < 0.5
ARIH2OS	0.446617	0.624687	0.714945	0.514153	0.288908	1 vs 2	0.820455	NS or Estimate < 0.5
CCR2	-0.943358	0.823075	-1.14614	0.315642	0.500805	1 vs 2	0.704759	NS or Estimate < 0.5
ZBTB1	0.692272	0.444936	1.55589	0.194716	0.710598	1 vs 2	0.597649	NS or Estimate < 0.5
PARK7	0.630797	0.351424	1.79497	0.147096	0.832399	1 vs 2	0.536881	NS or Estimate < 0.5
ADSL	0.209786	0.472898	0.443617	0.680259	0.167326	1 vs 2	0.902248	NS or Estimate < 0.5
KRTAP2-1	-0.415037	0.410208	-1.01177	0.368876	0.433119	1 vs 2	0.741711	NS or Estimate < 0.5
ADM	-0.943358	0.386175	-2.44283	0.0709919	1.14879	1 vs 2	0.387215	NS or Estimate < 0.5
PABPC1L	0.974938	0.441867	2.2064	0.0919937	1.03624	1 vs 2	0.423476	NS or Estimate < 0.5
CASK	1.02561	0.927811	1.1054	0.330996	0.480177	1 vs 2	0.712007	NS or Estimate < 0.5
SLC12A3	-1.13835	0.441867	-2.57622	0.0615729	1.21061	1 vs 2	0.363285	NS or Estimate < 0.5
SLC25A19	0.159118	0.495157	0.321348	0.764037	0.116886	1 vs 2	0.931575	NS or Estimate < 0.5
THTPA	-1.21248	0.411195	-2.94867	0.042025	1.37649	1 vs 2	0.326671	P < 0.05
PIGG	1.26643	0.418199	3.02829	0.0388458	1.41066	1 vs 2	0.319157	P < 0.05
MYO7A	-1.0817	0.803943	-1.3455	0.249675	0.602625	1 vs 2	0.653095	NS or Estimate < 0.5
CENPL	-0.553383	0.386175	-1.43299	0.225147	0.647534	1 vs 2	0.636284	NS or Estimate < 0.5
CFLAR	-0.717334	1.02845	-0.697489	0.523912	0.280741	1 vs 2	0.825319	NS or Estimate < 0.5
PCID2	1.0801	0.425354	2.53931	0.0640279	1.19363	1 vs 2	0.371717	NS or Estimate < 0.5
HMOX2	1.22059	0.821333	1.48611	0.211442	0.67481	1 vs 2	0.620148	NS or Estimate < 0.5
TET2	1.11328	0.432444	2.5744	0.0616912	1.20978	1 vs 2	0.363285	NS or Estimate < 0.5
AURKAIP1	-0.389975	0.624687	-0.624273	0.566288	0.246962	1 vs 2	0.847287	NS or Estimate < 0.5
GPBP1	0.854081	0.31387	2.72113	0.0529253	1.27634	1 vs 2	0.344451	NS or Estimate < 0.5
UBAP2L	-1.09011	1.95684	-0.557075	0.607175	0.216686	1 vs 2	0.872444	NS or Estimate < 0.5
MAD2L2	0.389975	0.948512	0.411144	0.70204	0.153638	1 vs 2	0.915666	NS or Estimate < 0.5
CDCA7L	1.52075	0.58091	2.61787	0.058931	1.22966	1 vs 2	0.357381	NS or Estimate < 0.5
MYRF	-1.27669	0.624687	-2.04373	0.110474	0.956739	1 vs 2	0.463848	NS or Estimate < 0.5
STXBP2	0.604594	0.638978	0.946188	0.397629	0.400522	1 vs 2	0.75524	NS or Estimate < 0.5
YPEL5	0.584963	0.968346	0.604084	0.578375	0.23779	1 vs 2	0.855977	NS or Estimate < 0.5
CRY2	0.308271	0.624687	0.49348	0.64754	0.188733	1 vs 2	0.884268	NS or Estimate < 0.5
ZNF469	0.887259	0.757647	1.17107	0.306571	0.513469	1 vs 2	0.702473	NS or Estimate < 0.5
ANK2	0.251629	0.942809	0.266893	0.802746	0.0954217	1 vs 2	0.947163	NS or Estimate < 0.5
ING4	1.50237	0.414543	3.62415	0.0222751	1.65218	1 vs 2	0.257203	P < 0.05
KCNE1	0.729282	0.569757	1.27999	0.269742	0.569051	1 vs 2	0.669978	NS or Estimate < 0.5
BEX4	1.02561	0.519141	1.97558	0.119404	0.922981	1 vs 2	0.485078	NS or Estimate < 0.5
CTSA	-1.27669	0.441867	-2.88931	0.0445937	1.35073	1 vs 2	0.328501	P < 0.05
ETFA	-0.276692	0.482977	-0.572888	0.597386	0.223745	1 vs 2	0.868133	NS or Estimate < 0.5
CEACAM19	-0.748371	0.563155	-1.32889	0.25462	0.594107	1 vs 2	0.653574	NS or Estimate < 0.5
KRTAP20-3	-1.37319	0.632249	-2.17192	0.0956047	1.01952	1 vs 2	0.434451	NS or Estimate < 0.5
AP4S1	-0.822502	0.535305	-1.53651	0.199222	0.700664	1 vs 2	0.604089	NS or Estimate < 0.5
ZEB1	0.251629	0.333333	0.754888	0.492327	0.307747	1 vs 2	0.815068	NS or Estimate < 0.5
ATXN7	1.81844	0.867003	2.09739	0.103959	0.983137	1 vs 2	0.4503	NS or Estimate < 0.5
UBP1	0.534295	0.610347	0.875395	0.430777	0.365747	1 vs 2	0.773171	NS or Estimate < 0.5
PAK3	-0.415037	0.834621	-0.497277	0.645087	0.190382	1 vs 2	0.884268	NS or Estimate < 0.5
UGT8	-0.276692	0.828134	-0.334115	0.755076	0.122009	1 vs 2	0.924712	NS or Estimate < 0.5
SULF1	-0.0817042	0.321364	-0.254242	0.811844	0.0905276	1 vs 2	0.949535	NS or Estimate < 0.5
SPRED2	-0.943358	0.782596	-1.20542	0.294472	0.530956	1 vs 2	0.689113	NS or Estimate < 0.5
WDSUB1	-0.415037	0.861804	-0.481591	0.655259	0.183587	1 vs 2	0.889323	NS or Estimate < 0.5
VGLL4	0.77995	0.546134	1.42813	0.226443	0.645041	1 vs 2	0.637014	NS or Estimate < 0.5
SLC39A13	-0.684156	0.688519	-0.993662	0.376631	0.424084	1 vs 2	0.743348	NS or Estimate < 0.5
DIS3	0.113283	0.646118	0.175329	0.869339	0.0608111	1 vs 2	0.959864	NS or Estimate < 0.5
TPRN	-0.943358	0.290061	-3.25228	0.0313083	1.50434	1 vs 2	0.296992	P < 0.05
LYRM1	-0.138346	0.441867	-0.313094	0.769855	0.113591	1 vs 2	0.933005	NS or Estimate < 0.5
LACC1	0.113283	0.995944	0.113745	0.914921	0.0386166	1 vs 2	0.970385	NS or Estimate < 0.5
TSPAN14	-0.502716	0.68796	-0.730734	0.505441	0.29633	1 vs 2	0.820455	NS or Estimate < 0.5
MPV17L	-0.586562	0.451925	-1.29792	0.264099	0.578233	1 vs 2	0.668079	NS or Estimate < 0.5
AP1AR	0.358939	0.335778	1.06898	0.345299	0.461804	1 vs 2	0.726429	NS or Estimate < 0.5
MAPKBP1	-5.35305	0.400576	-13.3634	0.00018132	3.74155	1 vs 2	0.0273847	FDR < 0.05
USP8	0.77995	0.275754	2.82843	0.0474207	1.32403	1 vs 2	0.330914	P < 0.05
NUDT22	-1.0817	0.666667	-1.62256	0.180005	0.744716	1 vs 2	0.581153	NS or Estimate < 0.5
ARHGEF3	0.446617	0.441867	1.01075	0.369311	0.432608	1 vs 2	0.741711	NS or Estimate < 0.5
REPS1	-0.0817042	0.824014	-0.0991538	0.925787	0.0334891	1 vs 2	0.973785	NS or Estimate < 0.5
SPIRE1	-0.0817042	0.471405	-0.173321	0.870817	0.0600733	1 vs 2	0.959864	NS or Estimate < 0.5
NCS1	0.113283	0.290061	0.39055	0.716037	0.145064	1 vs 2	0.918424	NS or Estimate < 0.5
TOMM40	-0.381859	0.935421	-0.408222	0.704018	0.152416	1 vs 2	0.91743	NS or Estimate < 0.5
ENTPD4	-0.748371	0.563155	-1.32889	0.25462	0.594107	1 vs 2	0.653574	NS or Estimate < 0.5
NAF1	0.251629	0.239081	1.05249	0.351955	0.453513	1 vs 2	0.731843	NS or Estimate < 0.5
SYNPO2	-0.943358	0.700796	-1.34612	0.249491	0.602946	1 vs 2	0.653095	NS or Estimate < 0.5
AEBP1	-1.0817	0.333333	-3.24511	0.0315211	1.5014	1 vs 2	0.296992	P < 0.05
NSDHL	0.553926	0.490396	1.12955	0.321815	0.492394	1 vs 2	0.704759	NS or Estimate < 0.5
INSYN2B	-0.340907	0.791021	-0.43097	0.688699	0.161971	1 vs 2	0.907019	NS or Estimate < 0.5
SYTL4	0.339307	0.75201	0.4512	0.675225	0.170552	1 vs 2	0.900358	NS or Estimate < 0.5
KRBOX4	-1.11488	0.959104	-1.16242	0.309691	0.509071	1 vs 2	0.704576	NS or Estimate < 0.5
GASK1A	-1.0817	0.881917	-1.22654	0.287258	0.541727	1 vs 2	0.684772	NS or Estimate < 0.5
CLEC12B	-0.327359	0.258131	-1.26819	0.273518	0.563014	1 vs 2	0.672794	NS or Estimate < 0.5
SLC9A3R2	0.228166	0.694391	0.328584	0.758952	0.119786	1 vs 2	0.928007	NS or Estimate < 0.5
ANKRD33	0.0256052	0.440643	0.0581088	0.956449	0.0193382	1 vs 2	0.987011	NS or Estimate < 0.5
ATP6V0A1	-0.276692	0.482977	-0.572888	0.597386	0.223745	1 vs 2	0.868133	NS or Estimate < 0.5
ZNF562	0.641604	0.77235	0.830717	0.452842	0.344054	1 vs 2	0.794581	NS or Estimate < 0.5
SHC1	0.705819	0.618132	1.14186	0.317225	0.498633	1 vs 2	0.704759	NS or Estimate < 0.5
DOCK9	-0.415037	0.471405	-0.880427	0.428348	0.368203	1 vs 2	0.770426	NS or Estimate < 0.5
ATF7	0.77995	0.546134	1.42813	0.226443	0.645041	1 vs 2	0.637014	NS or Estimate < 0.5
PLD1	-0.381859	0.871427	-0.4382	0.683867	0.165028	1 vs 2	0.903321	NS or Estimate < 0.5
PLXNB1	0.308271	0.624687	0.49348	0.64754	0.188733	1 vs 2	0.884268	NS or Estimate < 0.5
ABHD17A	0.63563	0.636159	0.999168	0.374258	0.426829	1 vs 2	0.741711	NS or Estimate < 0.5
ERAP2	-0.886717	0.782596	-1.13305	0.320505	0.494165	1 vs 2	0.704759	NS or Estimate < 0.5
LTBP3	0.251629	0.674899	0.37284	0.728184	0.137759	1 vs 2	0.918424	NS or Estimate < 0.5
YAP1	1.11328	0.760785	1.46334	0.217211	0.663118	1 vs 2	0.627762	NS or Estimate < 0.5
MYO1B	0.113283	0.290061	0.39055	0.716037	0.145064	1 vs 2	0.918424	NS or Estimate < 0.5
DNAJA4	-0.748371	0.745356	-1.00404	0.372168	0.429261	1 vs 2	0.741711	NS or Estimate < 0.5
ACAA1	0.0801048	0.975488	0.0821176	0.938498	0.0275666	1 vs 2	0.978464	NS or Estimate < 0.5
SMARCC2	1.52075	0.652701	2.32993	0.0802582	1.09551	1 vs 2	0.415144	NS or Estimate < 0.5
C15orf62	0.875084	0.499365	1.75239	0.154584	0.810837	1 vs 2	0.545933	NS or Estimate < 0.5
THAP5	0.0566417	0.602709	0.0939784	0.929646	0.0316826	1 vs 2	0.976237	NS or Estimate < 0.5
ERICH4	-0.610025	0.624687	-0.976529	0.384096	0.41556	1 vs 2	0.749312	NS or Estimate < 0.5
AP1M1	-0.641061	0.799131	-0.802198	0.467391	0.33032	1 vs 2	0.80015	NS or Estimate < 0.5
SPAG9	0.830618	0.509537	1.63014	0.178405	0.748593	1 vs 2	0.581153	NS or Estimate < 0.5
EIF4E	0.608426	0.415663	1.46375	0.217105	0.66333	1 vs 2	0.627723	NS or Estimate < 0.5
GUCY1A1	-0.0817042	0.883441	-0.092484	0.93076	0.0311621	1 vs 2	0.976237	NS or Estimate < 0.5
HMGB2	0.358939	0.527739	0.680144	0.533742	0.272669	1 vs 2	0.829463	NS or Estimate < 0.5
RUFY3	0.0391525	0.557909	0.0701773	0.947421	0.023457	1 vs 2	0.98273	NS or Estimate < 0.5
AHCYL2	0.302297	0.638978	0.473094	0.660807	0.179925	1 vs 2	0.891786	NS or Estimate < 0.5
IFT22	-1.0817	0.349508	-3.09494	0.0363994	1.43891	1 vs 2	0.311	P < 0.05
RTCA	0.218451	0.578202	0.37781	0.724765	0.139803	1 vs 2	0.918424	NS or Estimate < 0.5
PITPNM1	-0.415037	0.471405	-0.880427	0.428348	0.368203	1 vs 2	0.770426	NS or Estimate < 0.5
CAB39	1.07144	0.785858	1.3634	0.24445	0.61181	1 vs 2	0.646246	NS or Estimate < 0.5
CBLC	0.446617	0.903215	0.494474	0.646897	0.189165	1 vs 2	0.884268	NS or Estimate < 0.5
PPIP5K1	0.187414	0.77647	0.241367	0.821139	0.0855834	1 vs 2	0.951003	NS or Estimate < 0.5
CLDN5	-0.717334	0.757647	-0.946793	0.397356	0.40082	1 vs 2	0.75524	NS or Estimate < 0.5
PWWP2A	-0.415037	0.654411	-0.634215	0.560399	0.251503	1 vs 2	0.844009	NS or Estimate < 0.5
DMRT2	0.887259	0.169149	5.24543	0.00631685	2.1995	1 vs 2	0.149857	P < 0.05
SUGT1	1.71573	0.677365	2.53295	0.0644618	1.1907	1 vs 2	0.373181	NS or Estimate < 0.5
RABL2B	0.974938	0.441867	2.2064	0.0919937	1.03624	1 vs 2	0.423476	NS or Estimate < 0.5
NEMP1	0.00597397	0.727839	0.00820782	0.993844	0.00268168	1 vs 2	0.995259	NS or Estimate < 0.5
SUN1	0.358939	0.527739	0.680144	0.533742	0.272669	1 vs 2	0.829463	NS or Estimate < 0.5
ZNF385A	0.315844	0.619962	0.509457	0.637252	0.195689	1 vs 2	0.884268	NS or Estimate < 0.5
NSMF	-0.748371	0.78138	-0.957756	0.392423	0.406246	1 vs 2	0.754009	NS or Estimate < 0.5
CRISP1	-0.0817042	0.333333	-0.245112	0.818431	0.087018	1 vs 2	0.949535	NS or Estimate < 0.5
TMEM131L	-0.22005	0.624687	-0.352256	0.742422	0.129349	1 vs 2	0.920156	NS or Estimate < 0.5
SATB1	-0.489168	0.846739	-0.577709	0.594422	0.225905	1 vs 2	0.865549	NS or Estimate < 0.5
PEX5	0.0566417	0.528321	0.107211	0.919784	0.0363142	1 vs 2	0.971944	NS or Estimate < 0.5
AP3M2	0.0256052	0.519141	0.0493223	0.963027	0.0163615	1 vs 2	0.989029	NS or Estimate < 0.5
PRR22	-0.22005	0.546134	-0.402923	0.707611	0.150205	1 vs 2	0.918096	NS or Estimate < 0.5
STRIP2	-0.748371	0.333333	-2.24511	0.0881211	1.05492	1 vs 2	0.421296	NS or Estimate < 0.5
PSMG3	-3.23454	0.610596	-5.29734	0.00609812	2.2148	1 vs 2	0.149827	P < 0.05
RBM20	0.77995	0.570297	1.36762	0.243234	0.613977	1 vs 2	0.64548	NS or Estimate < 0.5
SLC6A6	-0.610025	0.624687	-0.976529	0.384096	0.41556	1 vs 2	0.749312	NS or Estimate < 0.5
TBC1D5	0.692272	0.712232	0.971975	0.386102	0.413298	1 vs 2	0.75087	NS or Estimate < 0.5
ZDHHC4	0.382402	0.917801	0.41665	0.698322	0.155944	1 vs 2	0.912741	NS or Estimate < 0.5
C7orf50	0.251629	0.563155	0.446821	0.67813	0.168687	1 vs 2	0.901379	NS or Estimate < 0.5
VAV2	0.0256052	0.726291	0.0352547	0.973566	0.0116347	1 vs 2	0.989644	NS or Estimate < 0.5
CDV3	-0.748371	0.874378	-0.855889	0.440301	0.356251	1 vs 2	0.780713	NS or Estimate < 0.5
AZI2	-0.805012	0.850628	-0.946375	0.397545	0.400614	1 vs 2	0.75524	NS or Estimate < 0.5
IQCG	0.0256052	0.675248	0.0379197	0.971569	0.0125265	1 vs 2	0.989644	NS or Estimate < 0.5
LSMEM1	-0.684156	0.619962	-1.10354	0.331713	0.479237	1 vs 2	0.712007	NS or Estimate < 0.5
GSE1	-0.0817042	0.958548	-0.0852374	0.936168	0.028646	1 vs 2	0.977575	NS or Estimate < 0.5
LRRC8B	-0.415037	0.745356	-0.556831	0.607326	0.216578	1 vs 2	0.872444	NS or Estimate < 0.5
LRRC8D	-0.145919	0.688519	-0.211932	0.842521	0.0744192	1 vs 2	0.955342	NS or Estimate < 0.5
TOMM6	1.26369	0.377877	3.34417	0.028724	1.54176	1 vs 2	0.290922	P < 0.05
AFAP1	-0.610025	0.441867	-1.38056	0.239542	0.620619	1 vs 2	0.64548	NS or Estimate < 0.5
ZNF213	0.0566417	1.00282	0.0564826	0.957666	0.0187859	1 vs 2	0.987386	NS or Estimate < 0.5
HOGA1	-0.415037	0.471405	-0.880427	0.428348	0.368203	1 vs 2	0.770426	NS or Estimate < 0.5
DERL1	-0.748371	0.546134	-1.37031	0.242463	0.615354	1 vs 2	0.64548	NS or Estimate < 0.5
NFIA	-0.586562	0.722042	-0.812366	0.462162	0.335206	1 vs 2	0.798117	NS or Estimate < 0.5
OST4	1.25163	0.869256	1.43989	0.223317	0.651078	1 vs 2	0.636284	NS or Estimate < 0.5
SARDH	-4.37183	0.576845	-7.57886	0.00162532	2.78906	1 vs 2	0.0791092	P < 0.05
DEK	1.02561	0.572977	1.78996	0.147958	0.829862	1 vs 2	0.538729	NS or Estimate < 0.5
ARFRP1	1.13291	0.552519	2.05045	0.109634	0.960056	1 vs 2	0.463848	NS or Estimate < 0.5
KLC2	0.766403	0.48181	1.59067	0.186892	0.72841	1 vs 2	0.588781	NS or Estimate < 0.5
HYLS1	-0.0817042	0.79473	-0.102807	0.923064	0.0347683	1 vs 2	0.973374	NS or Estimate < 0.5
AHI1	0.113283	0.528321	0.214421	0.840706	0.0753559	1 vs 2	0.955342	NS or Estimate < 0.5
PPP1R18	0.974938	0.624687	1.56068	0.193619	0.713052	1 vs 2	0.596242	NS or Estimate < 0.5
RTL1	0.358939	0.39799	0.901878	0.418118	0.378701	1 vs 2	0.770426	NS or Estimate < 0.5
FERMT2	0.974938	0.389975	2.5	0.0667665	1.17544	1 vs 2	0.379885	NS or Estimate < 0.5
ELMOD3	-1.61002	0.609388	-2.64204	0.0574579	1.24065	1 vs 2	0.356447	NS or Estimate < 0.5
JDP2	-1.0817	0.471405	-2.29464	0.0834296	1.07868	1 vs 2	0.418974	NS or Estimate < 0.5
DNAJA3	0.308271	0.462739	0.666188	0.541746	0.266204	1 vs 2	0.832466	NS or Estimate < 0.5
CCDC36	0.692272	0.712232	0.971975	0.386102	0.413298	1 vs 2	0.75087	NS or Estimate < 0.5
FKBP6	-1.27669	0.694597	-1.83803	0.139917	0.854129	1 vs 2	0.522908	NS or Estimate < 0.5
TAF12	0.308271	0.138346	2.22826	0.089784	1.0468	1 vs 2	0.422978	NS or Estimate < 0.5
NDRG1	0.900807	0.766889	1.17462	0.305299	0.515275	1 vs 2	0.700653	NS or Estimate < 0.5
PAX7	-0.85568	0.519141	-1.64826	0.174644	0.757846	1 vs 2	0.575862	NS or Estimate < 0.5
HSF2	1.04907	0.659465	1.59079	0.186867	0.728468	1 vs 2	0.588781	NS or Estimate < 0.5
SMIM13	-0.0817042	0.745356	-0.109618	0.917992	0.0371611	1 vs 2	0.971735	NS or Estimate < 0.5
C5orf24	0.738106	0.981524	0.752	0.493881	0.306378	1 vs 2	0.815068	NS or Estimate < 0.5
GDAP2	-0.522347	0.967561	-0.539859	0.617945	0.20905	1 vs 2	0.875396	NS or Estimate < 0.5
CLHC1	-0.85568	0.78138	-1.09509	0.334991	0.474967	1 vs 2	0.716443	NS or Estimate < 0.5
ARHGAP26	0.113283	0.570297	0.198639	0.852233	0.0694419	1 vs 2	0.955342	NS or Estimate < 0.5
PIP5K1A	-0.836049	0.638978	-1.30842	0.260849	0.583611	1 vs 2	0.663334	NS or Estimate < 0.5
INPP5K	-1.91232	0.765948	-2.49667	0.0670043	1.1739	1 vs 2	0.380605	NS or Estimate < 0.5
PTPRK	1.11328	0.494278	2.25234	0.0874183	1.0584	1 vs 2	0.421296	NS or Estimate < 0.5
EIF2AK2	0.799581	0.64251	1.24446	0.281266	0.550883	1 vs 2	0.679596	NS or Estimate < 0.5
PABPC4	0.812237	0.504841	1.6089	0.182922	0.737734	1 vs 2	0.587249	NS or Estimate < 0.5
MSRA	0.308271	0.723308	0.426196	0.691899	0.159957	1 vs 2	0.910029	NS or Estimate < 0.5
ATL2	1.12074	0.345141	3.24719	0.0314592	1.50225	1 vs 2	0.296992	P < 0.05
SMIM19	1.01803	0.608507	1.673	0.169643	0.770464	1 vs 2	0.574615	NS or Estimate < 0.5
DERL3	0.692272	0.672427	1.02951	0.361417	0.441992	1 vs 2	0.741711	NS or Estimate < 0.5
ECD	0.200961	0.527543	0.380939	0.722617	0.141092	1 vs 2	0.918424	NS or Estimate < 0.5
RPN2	0.63563	0.309274	2.05523	0.109041	0.96241	1 vs 2	0.46294	NS or Estimate < 0.5
LRP5L	-0.610025	0.909166	-0.670972	0.538993	0.268417	1 vs 2	0.832466	NS or Estimate < 0.5
ZBTB43	-0.276692	0.386175	-0.716493	0.513294	0.289634	1 vs 2	0.820455	NS or Estimate < 0.5
FDPS	-2.65768	1.47668	-1.79976	0.146279	0.834819	1 vs 2	0.535427	NS or Estimate < 0.5
RNF185	0.604594	0.661452	0.91404	0.412408	0.384672	1 vs 2	0.769519	NS or Estimate < 0.5
POSTN	0.922287	0.349962	2.63539	0.0578585	1.23763	1 vs 2	0.357381	NS or Estimate < 0.5
MYOT	0.251629	0.502143	0.501111	0.642614	0.19205	1 vs 2	0.884268	NS or Estimate < 0.5
GKAP1	0.692272	0.519141	1.3335	0.25324	0.596468	1 vs 2	0.653574	NS or Estimate < 0.5
TRPC4	0.77995	0.928393	0.840108	0.44813	0.348596	1 vs 2	0.788875	NS or Estimate < 0.5
NDUFB11	0.0801048	0.546313	0.146628	0.890519	0.0503569	1 vs 2	0.963485	NS or Estimate < 0.5
ABL2	-0.415037	8.62956e-17	-4809486694493455	1.12139e-62	61.9502	1 vs 2	7.19792e-60	NS or Estimate < 0.5
C2CD4D	-0.415037	1.10554	-0.375416	0.726411	0.138818	1 vs 2	0.918424	NS or Estimate < 0.5
NFATC4	-0.943358	0.570297	-1.65415	0.173439	0.760853	1 vs 2	0.575862	NS or Estimate < 0.5
PUF60	-1.41	0.446135	-3.16048	0.0341683	1.46638	1 vs 2	0.305829	P < 0.05
TRMT1	-1.24566	0.6938	-1.79541	0.147022	0.832619	1 vs 2	0.536881	NS or Estimate < 0.5
ZNF692	1.02944	0.676501	1.52171	0.202734	0.693074	1 vs 2	0.611117	NS or Estimate < 0.5
LIMS2	-0.553383	0.624687	-0.885857	0.425739	0.370856	1 vs 2	0.770426	NS or Estimate < 0.5
ZNF415	-2.59476	2.38746	-1.08683	0.338222	0.470798	1 vs 2	0.720353	NS or Estimate < 0.5
LRIG3	0.0714397	0.742413	0.0962264	0.927969	0.0324665	1 vs 2	0.97561	NS or Estimate < 0.5
COLCA2	-1.61002	0.194988	-8.25707	0.00117363	2.93047	1 vs 2	0.0663855	P < 0.05
BEAN1	0.251629	0.333333	0.754888	0.492327	0.307747	1 vs 2	0.815068	NS or Estimate < 0.5
R3HCC1	-1.0817	0.74913	-1.44395	0.222247	0.653163	1 vs 2	0.636273	NS or Estimate < 0.5
FBXO28	0.187414	0.619962	0.302299	0.777491	0.109305	1 vs 2	0.93554	NS or Estimate < 0.5
SLF2	-0.0817042	0.745356	-0.109618	0.917992	0.0371611	1 vs 2	0.971735	NS or Estimate < 0.5
ALG1L2	0.132915	0.750513	0.177098	0.868037	0.0614618	1 vs 2	0.959864	NS or Estimate < 0.5
OTUD5	1.02561	0.787492	1.30237	0.262716	0.580513	1 vs 2	0.666478	NS or Estimate < 0.5
HSBP1L1	-0.697703	0.638978	-1.0919	0.336233	0.47336	1 vs 2	0.717046	NS or Estimate < 0.5
LAX1	-0.748371	0.909166	-0.82314	0.456672	0.340396	1 vs 2	0.794649	NS or Estimate < 0.5
FZR1	-0.96299	1.10902	-0.868321	0.434212	0.362299	1 vs 2	0.77581	NS or Estimate < 0.5
GRAMD1A	-0.553383	0.471993	-1.17244	0.306081	0.514164	1 vs 2	0.70182	NS or Estimate < 0.5
BORCS7	0.584963	0.471405	1.24089	0.28245	0.549058	1 vs 2	0.679596	NS or Estimate < 0.5
RCOR3	0.468988	0.655142	0.715857	0.513647	0.289336	1 vs 2	0.820455	NS or Estimate < 0.5
ATXN7L3B	-0.415037	0.747158	-0.555488	0.608162	0.21598	1 vs 2	0.872444	NS or Estimate < 0.5
IFFO2	0.389975	0.609388	0.639946	0.557023	0.254127	1 vs 2	0.843751	NS or Estimate < 0.5
DAZAP2	2.41558	0.565611	4.27074	0.0129425	1.88798	1 vs 2	0.209652	P < 0.05
AKIRIN1	0.63563	0.309274	2.05523	0.109041	0.96241	1 vs 2	0.46294	NS or Estimate < 0.5
ANP32E	1.29472	0.683355	1.89466	0.131044	0.882582	1 vs 2	0.507771	NS or Estimate < 0.5
C19orf38	-0.415037	0.482977	-0.859332	0.438608	0.357924	1 vs 2	0.779139	NS or Estimate < 0.5
C1orf198	0.641604	0.583266	1.10002	0.333076	0.477457	1 vs 2	0.714281	NS or Estimate < 0.5
BTF3L4	1.54175	0.371826	4.14643	0.0143016	1.84462	1 vs 2	0.218059	P < 0.05
ZNF841	0.372486	0.691469	0.538688	0.618683	0.208532	1 vs 2	0.875396	NS or Estimate < 0.5
ZNF844	0.553926	0.75751	0.731246	0.50516	0.296571	1 vs 2	0.820455	NS or Estimate < 0.5
SYT2	1.35894	0.58204	2.33478	0.0798327	1.09782	1 vs 2	0.413914	NS or Estimate < 0.5
BTBD19	-0.748371	0.79473	-0.941667	0.399681	0.398287	1 vs 2	0.75665	NS or Estimate < 0.5
ACAD10	-0.340907	0.698118	-0.488322	0.650882	0.186498	1 vs 2	0.885372	NS or Estimate < 0.5
TLK1	1.18741	0.718936	1.65163	0.173955	0.759563	1 vs 2	0.575862	NS or Estimate < 0.5
ZAR1L	-2.50272	0.645482	-3.87728	0.0178825	1.74757	1 vs 2	0.236229	P < 0.05
LRRFIP1	0.113283	0.445192	0.25446	0.811687	0.0906116	1 vs 2	0.949535	NS or Estimate < 0.5
TMEM151B	-1.41504	0.639823	-2.21161	0.0914623	1.03876	1 vs 2	0.423476	NS or Estimate < 0.5
ILF3	1.75774	0.273252	6.43265	0.00300379	2.52233	1 vs 2	0.106591	P < 0.05
ATXN1L	0.590936	0.469102	1.25972	0.276261	0.558681	1 vs 2	0.675893	NS or Estimate < 0.5
SVOPL	-0.307728	0.519141	-0.592764	0.585227	0.232676	1 vs 2	0.858734	NS or Estimate < 0.5
BCAP31	1.29472	0.706757	1.83192	0.140913	0.851049	1 vs 2	0.526054	NS or Estimate < 0.5
CNST	-0.0817042	0.546134	-0.149605	0.888317	0.0514322	1 vs 2	0.963485	NS or Estimate < 0.5
ALOX15	0.553926	0.507324	1.09186	0.336251	0.473337	1 vs 2	0.717046	NS or Estimate < 0.5
ATP13A2	-0.0817042	0.909166	-0.0898671	0.932713	0.0302521	1 vs 2	0.976921	NS or Estimate < 0.5
TP53BP1	0.774914	0.597244	1.29748	0.264235	0.57801	1 vs 2	0.668232	NS or Estimate < 0.5
NIPA1	0.0391525	0.869558	0.0450258	0.966245	0.0149128	1 vs 2	0.989644	NS or Estimate < 0.5
RNASEH2B	0.692272	0.254244	2.72286	0.0528307	1.27711	1 vs 2	0.344271	NS or Estimate < 0.5
SEMA4D	0.0566417	0.386175	0.146674	0.890485	0.0503733	1 vs 2	0.963485	NS or Estimate < 0.5
EMC8	0.113283	0.694597	0.163092	0.878354	0.0563304	1 vs 2	0.962053	NS or Estimate < 0.5
MGRN1	-0.943358	0.502143	-1.87867	0.133487	0.874562	1 vs 2	0.510815	NS or Estimate < 0.5
ARFGAP3	1.02561	0.36005	2.84851	0.0464659	1.33287	1 vs 2	0.330914	P < 0.05
SPART	0.918296	0.666667	1.37744	0.240426	0.619018	1 vs 2	0.64548	NS or Estimate < 0.5
TMEM169	-0.869228	0.801293	-1.08478	0.339026	0.469766	1 vs 2	0.721467	NS or Estimate < 0.5
DMTF1	0.446617	0.510393	0.875044	0.430947	0.365576	1 vs 2	0.773206	NS or Estimate < 0.5
THOC6	0.641604	0.449281	1.42807	0.226459	0.64501	1 vs 2	0.637014	NS or Estimate < 0.5
NEDD9	-0.276692	0.739906	-0.373955	0.727415	0.138217	1 vs 2	0.918424	NS or Estimate < 0.5
CTIF	0.974938	0.194988	5	0.00749043	2.12549	1 vs 2	0.158286	P < 0.05
MORF4L2	0.446617	0.6096	0.732639	0.504397	0.297227	1 vs 2	0.820455	NS or Estimate < 0.5
EDC3	-1.56818	0.612258	-2.56131	0.0625513	1.20376	1 vs 2	0.365833	NS or Estimate < 0.5
HES4	-1.27669	0.349508	-3.65283	0.0217172	1.6632	1 vs 2	0.254504	P < 0.05
BMERB1	1.98376	0.563152	3.52261	0.0243926	1.61274	1 vs 2	0.269658	P < 0.05
INTS12	-0.340907	0.668643	-0.509849	0.637001	0.19586	1 vs 2	0.884268	NS or Estimate < 0.5
NREP	0.766403	0.486474	1.57542	0.190281	0.720604	1 vs 2	0.591641	NS or Estimate < 0.5
FLYWCH2	1.44662	0.612014	2.3637	0.0773504	1.11154	1 vs 2	0.405184	NS or Estimate < 0.5
SLC35B3	0.77995	0.928393	0.840108	0.44813	0.348596	1 vs 2	0.788875	NS or Estimate < 0.5
CPSF7	0.692272	0.563986	1.22746	0.286946	0.5422	1 vs 2	0.684772	NS or Estimate < 0.5
BBX	-0.0817042	0.44216	-0.184784	0.862389	0.0642968	1 vs 2	0.958314	NS or Estimate < 0.5
ZNF780A	0.358939	0.335778	1.06898	0.345299	0.461804	1 vs 2	0.726429	NS or Estimate < 0.5
NFYC	0.520747	0.478023	1.08938	0.337222	0.472084	1 vs 2	0.718601	NS or Estimate < 0.5
ITPK1	-0.610025	0.570297	-1.06966	0.345024	0.46215	1 vs 2	0.726429	NS or Estimate < 0.5
EFTUD2	0.108681	0.859741	0.126412	0.905505	0.0431089	1 vs 2	0.968035	NS or Estimate < 0.5
TGFBRAP1	0.0566417	0.290061	0.195275	0.854696	0.0681885	1 vs 2	0.956727	NS or Estimate < 0.5
PIK3R5	-0.610025	0.861804	-0.707846	0.518106	0.285582	1 vs 2	0.822784	NS or Estimate < 0.5
TNRC6C	0.836592	0.333333	2.50978	0.0660732	1.17997	1 vs 2	0.378456	NS or Estimate < 0.5
HNRNPLL	-0.586562	0.938464	-0.625023	0.565842	0.247305	1 vs 2	0.847083	NS or Estimate < 0.5
PTGES3L	0.308271	0.386175	0.798267	0.469425	0.328434	1 vs 2	0.80105	NS or Estimate < 0.5
ATG13	-1.15583	1.33243	-0.867464	0.434629	0.361881	1 vs 2	0.776164	NS or Estimate < 0.5
CHID1	-0.748371	0.881917	-0.848573	0.443917	0.352698	1 vs 2	0.784281	NS or Estimate < 0.5
ARHGAP32	-0.0250625	0.850628	-0.0294635	0.977906	0.00970274	1 vs 2	0.990381	NS or Estimate < 0.5
FAM111B	-1.32736	0.618764	-2.14518	0.0985132	1.00651	1 vs 2	0.435969	NS or Estimate < 0.5
ERI2	-0.0817042	0.546134	-0.149605	0.888317	0.0514322	1 vs 2	0.963485	NS or Estimate < 0.5
HSD3B7	0.571415	0.326596	1.74961	0.155087	0.809424	1 vs 2	0.546472	NS or Estimate < 0.5
C17orf49	0.641604	0.570297	1.12504	0.323513	0.490108	1 vs 2	0.704759	NS or Estimate < 0.5
SLC6A8	-0.553383	0.624687	-0.885857	0.425739	0.370856	1 vs 2	0.770426	NS or Estimate < 0.5
PIEZO1	-0.641061	0.527739	-1.21473	0.29127	0.535704	1 vs 2	0.687127	NS or Estimate < 0.5
API5	0.0490683	0.917801	0.0534629	0.959927	0.0177619	1 vs 2	0.98891	NS or Estimate < 0.5
AMIGO2	0.446617	0.386175	1.15651	0.311838	0.50607	1 vs 2	0.704576	NS or Estimate < 0.5
MPC2	0.169925	0.639823	0.265581	0.803688	0.0949126	1 vs 2	0.94785	NS or Estimate < 0.5
FAM13C	-1.47168	0.536169	-2.74481	0.0516495	1.28693	1 vs 2	0.340026	NS or Estimate < 0.5
CTDNEP1	1.54312	0.808782	1.90795	0.12905	0.889242	1 vs 2	0.504124	NS or Estimate < 0.5
SLC25A39	0.584963	0.410208	1.42601	0.22701	0.643954	1 vs 2	0.63769	NS or Estimate < 0.5
TPCN1	0.113283	0.792244	0.14299	0.893212	0.0490457	1 vs 2	0.964289	NS or Estimate < 0.5
MAPRE2	-0.145919	0.688519	-0.211932	0.842521	0.0744192	1 vs 2	0.955342	NS or Estimate < 0.5
HRH4	-0.943358	0.68087	-1.38552	0.238143	0.623163	1 vs 2	0.64548	NS or Estimate < 0.5
CCDC68	-0.748371	0.909166	-0.82314	0.456672	0.340396	1 vs 2	0.794649	NS or Estimate < 0.5
LEUTX	-0.132372	0.638978	-0.207162	0.846002	0.0726284	1 vs 2	0.955342	NS or Estimate < 0.5
NOX4	-0.943358	0.792244	-1.19074	0.299587	0.523477	1 vs 2	0.693588	NS or Estimate < 0.5
TCTN2	-1.80501	0.609388	-2.96201	0.0414716	1.38225	1 vs 2	0.325522	P < 0.05
TCHP	0.308271	0.683032	0.451327	0.675141	0.170605	1 vs 2	0.900358	NS or Estimate < 0.5
RPH3A	-0.0817042	0.702318	-0.116335	0.912994	0.0395322	1 vs 2	0.969142	NS or Estimate < 0.5
BSDC1	1.10248	0.247143	4.46088	0.0111527	1.95262	1 vs 2	0.192501	P < 0.05
TMEM30A	-2.14098	0.245151	-8.73331	0.000947103	3.0236	1 vs 2	0.0611745	P < 0.05
CAPN8	-0.415037	0.777407	-0.533874	0.621717	0.206407	1 vs 2	0.875396	NS or Estimate < 0.5
TBC1D7	-0.660693	0.826544	-0.799344	0.468867	0.328951	1 vs 2	0.80105	NS or Estimate < 0.5
UBTFL1	1.02561	0.294714	3.48	0.0253521	1.59599	1 vs 2	0.275228	P < 0.05
NDE1	-0.327359	0.68796	-0.475841	0.659011	0.181107	1 vs 2	0.890876	NS or Estimate < 0.5
BANF1	1.55393	0.645282	2.40814	0.0737035	1.13251	1 vs 2	0.39506	NS or Estimate < 0.5
TLE6	-1.67022	0.356859	-4.68033	0.00944543	2.02478	1 vs 2	0.178041	P < 0.05
NBPF6	-0.22005	0.624687	-0.352256	0.742422	0.129349	1 vs 2	0.920156	NS or Estimate < 0.5
WRAP53	0.974938	0.441867	2.2064	0.0919937	1.03624	1 vs 2	0.423476	NS or Estimate < 0.5
AMFR	0.553926	0.623325	0.888663	0.424396	0.372229	1 vs 2	0.770426	NS or Estimate < 0.5
TMX2	0.251629	0.333333	0.754888	0.492327	0.307747	1 vs 2	0.815068	NS or Estimate < 0.5
NHSL1	-0.415037	0.777407	-0.533874	0.621717	0.206407	1 vs 2	0.875396	NS or Estimate < 0.5
COPB1	0.876452	0.487422	1.79814	0.146555	0.833998	1 vs 2	0.53608	NS or Estimate < 0.5
ABCC3	0.0626156	0.519141	0.120614	0.909813	0.041048	1 vs 2	0.969142	NS or Estimate < 0.5
LDHAL6A	-1.74837	0.666667	-2.62256	0.0586419	1.23179	1 vs 2	0.357381	NS or Estimate < 0.5
DET1	0.715735	0.299384	2.39069	0.0751113	1.12429	1 vs 2	0.400172	NS or Estimate < 0.5
PHLDB1	-0.350822	0.376969	-0.930641	0.40472	0.392845	1 vs 2	0.762252	NS or Estimate < 0.5
TLE2	0.641604	0.739645	0.867449	0.434637	0.361874	1 vs 2	0.776164	NS or Estimate < 0.5
DENND4A	0.0256052	0.440643	0.0581088	0.956449	0.0193382	1 vs 2	0.987011	NS or Estimate < 0.5
VSTM5	-0.641061	0.799131	-0.802198	0.467391	0.33032	1 vs 2	0.80015	NS or Estimate < 0.5
DOK3	-0.112741	0.785539	-0.14352	0.892819	0.0492364	1 vs 2	0.96417	NS or Estimate < 0.5
IMPA1	0.339307	0.481857	0.704166	0.520163	0.28386	1 vs 2	0.823505	NS or Estimate < 0.5
MBIP	0.641604	0.528321	1.21442	0.291377	0.535545	1 vs 2	0.687127	NS or Estimate < 0.5
MIEF2	-0.641061	0.552519	-1.16025	0.310478	0.50797	1 vs 2	0.704576	NS or Estimate < 0.5
NKIRAS2	-1.0817	0.333333	-3.24511	0.0315211	1.5014	1 vs 2	0.296992	P < 0.05
MYL12B	0.27547	0.28628	0.962239	0.39042	0.408468	1 vs 2	0.751991	NS or Estimate < 0.5
MTHFD2L	0.0566417	0.386175	0.146674	0.890485	0.0503733	1 vs 2	0.963485	NS or Estimate < 0.5
CCDC169	-0.415037	0.471405	-0.880427	0.428348	0.368203	1 vs 2	0.770426	NS or Estimate < 0.5
ANG	-0.0817042	0.333333	-0.245112	0.818431	0.087018	1 vs 2	0.949535	NS or Estimate < 0.5
MUC7	0.251629	0.333333	0.754888	0.492327	0.307747	1 vs 2	0.815068	NS or Estimate < 0.5
BTN3A1	0.358939	0.743902	0.482508	0.654662	0.183983	1 vs 2	0.888982	NS or Estimate < 0.5
SCRN2	-0.748371	0.666667	-1.12256	0.32445	0.488852	1 vs 2	0.704759	NS or Estimate < 0.5
PLET1	-1.32736	0.618764	-2.14518	0.0985132	1.00651	1 vs 2	0.435969	NS or Estimate < 0.5
PTPRQ	-1.0817	0.333333	-3.24511	0.0315211	1.5014	1 vs 2	0.296992	P < 0.05
IQCF5	-1.22005	0.948512	-1.28628	0.267749	0.572272	1 vs 2	0.669978	NS or Estimate < 0.5
COG6	0.163951	0.861177	0.19038	0.858283	0.0663695	1 vs 2	0.957042	NS or Estimate < 0.5
ZNF619	-0.169382	0.87207	-0.19423	0.855461	0.0677997	1 vs 2	0.956727	NS or Estimate < 0.5
RRP12	-0.415037	0.471405	-0.880427	0.428348	0.368203	1 vs 2	0.770426	NS or Estimate < 0.5
CAPN14	0.0256052	0.720841	0.0355213	0.973366	0.0117238	1 vs 2	0.989644	NS or Estimate < 0.5
SLC1A5	1.25163	0.666667	1.87744	0.133676	0.873948	1 vs 2	0.510841	NS or Estimate < 0.5
CRHR1	-1.4385	0.875346	-1.64335	0.175655	0.755339	1 vs 2	0.577983	NS or Estimate < 0.5
UBE2QL1	-1.27669	0.624687	-2.04373	0.110474	0.956739	1 vs 2	0.463848	NS or Estimate < 0.5
FAM200B	0.520747	0.39356	1.32317	0.256345	0.591175	1 vs 2	0.656525	NS or Estimate < 0.5
KIAA1671	-0.276692	0.386175	-0.716493	0.513294	0.289634	1 vs 2	0.820455	NS or Estimate < 0.5
ANKRD65	0.433069	0.445977	0.971057	0.386507	0.412842	1 vs 2	0.75087	NS or Estimate < 0.5
SLCO2B1	0.543119	0.921475	0.589402	0.587273	0.23116	1 vs 2	0.859648	NS or Estimate < 0.5
SP9	-1.54581	0.810627	-1.90693	0.129202	0.88873	1 vs 2	0.504276	NS or Estimate < 0.5
LAMTOR2	-0.307728	0.799131	-0.385078	0.719779	0.142801	1 vs 2	0.918424	NS or Estimate < 0.5
FAM185A	0.553926	0.497965	1.11238	0.328319	0.483704	1 vs 2	0.708965	NS or Estimate < 0.5
NGLY1	1.11328	0.694597	1.60278	0.184246	0.734603	1 vs 2	0.588781	NS or Estimate < 0.5
EXOC7	0.497284	0.760169	0.654176	0.548702	0.260664	1 vs 2	0.839942	NS or Estimate < 0.5
IQCN	-0.358396	0.811524	-0.441633	0.681579	0.166484	1 vs 2	0.902248	NS or Estimate < 0.5
ETV3	-0.446074	0.20208	-2.20742	0.0918901	1.03673	1 vs 2	0.423476	NS or Estimate < 0.5
UBE2Q2	-0.0817042	0.593769	-0.137603	0.897203	0.0471092	1 vs 2	0.964846	NS or Estimate < 0.5
MDM2	-0.85568	0.888422	-0.963146	0.390016	0.408918	1 vs 2	0.751353	NS or Estimate < 0.5
ZNF566	0.692272	0.519141	1.3335	0.25324	0.596468	1 vs 2	0.653574	NS or Estimate < 0.5
ZNF576	0.446617	0.656661	0.680133	0.533748	0.272664	1 vs 2	0.829463	NS or Estimate < 0.5
IPP	-0.415037	0.911701	-0.455234	0.672556	0.172272	1 vs 2	0.899795	NS or Estimate < 0.5
ELF1	0.641604	1.07198	0.598525	0.581733	0.235276	1 vs 2	0.85702	NS or Estimate < 0.5
MKLN1	0.692272	0.976581	0.708873	0.517532	0.286062	1 vs 2	0.822001	NS or Estimate < 0.5
PTPN3	0.187414	0.602452	0.311086	0.771273	0.112792	1 vs 2	0.933005	NS or Estimate < 0.5
TSEN2	1.05664	0.823075	1.28377	0.268541	0.570989	1 vs 2	0.669978	NS or Estimate < 0.5
CCDC110	-0.748371	0.624894	-1.1976	0.297189	0.526968	1 vs 2	0.692092	NS or Estimate < 0.5
TMEM205	-0.610025	0.909166	-0.670972	0.538993	0.268417	1 vs 2	0.832466	NS or Estimate < 0.5
MSL2	0.251629	0.674899	0.37284	0.728184	0.137759	1 vs 2	0.918424	NS or Estimate < 0.5
TTC28	-1.87914	0.625542	-3.00402	0.0397839	1.40029	1 vs 2	0.320672	P < 0.05
NR1D2	-1.80501	0.570297	-3.16504	0.0340191	1.46828	1 vs 2	0.305399	P < 0.05
ZNF880	-0.0250625	0.710137	-0.0352925	0.973537	0.0116473	1 vs 2	0.989644	NS or Estimate < 0.5
SCAF4	0.641604	0.570297	1.12504	0.323513	0.490108	1 vs 2	0.704759	NS or Estimate < 0.5
ZNF200	-1.27669	0.694597	-1.83803	0.139917	0.854129	1 vs 2	0.522908	NS or Estimate < 0.5
SCRN1	0.887259	0.523705	1.6942	0.165476	0.781264	1 vs 2	0.567237	NS or Estimate < 0.5
YPEL3	0.854081	0.452704	1.88662	0.132266	0.878553	1 vs 2	0.510196	NS or Estimate < 0.5
ZSCAN18	0.0566417	0.386175	0.146674	0.890485	0.0503733	1 vs 2	0.963485	NS or Estimate < 0.5
TRIM45	0.0566417	0.386175	0.146674	0.890485	0.0503733	1 vs 2	0.963485	NS or Estimate < 0.5
APH1B	-1.61002	0.463018	-3.47724	0.0254157	1.5949	1 vs 2	0.275628	P < 0.05
ZNF529	0.107309	0.808639	0.132704	0.900836	0.0453544	1 vs 2	0.96784	NS or Estimate < 0.5
CTAGE9	-1.13835	0.441867	-2.57622	0.0615729	1.21061	1 vs 2	0.363285	NS or Estimate < 0.5
RFX8	-1.0817	0.881917	-1.22654	0.287258	0.541727	1 vs 2	0.684772	NS or Estimate < 0.5
GLG1	1.30827	0.386175	3.38777	0.0275868	1.5593	1 vs 2	0.28734	P < 0.05
SORBS2	1.43307	0.601775	2.38141	0.0758732	1.11991	1 vs 2	0.401362	NS or Estimate < 0.5
NUPR2	-0.0250625	0.850628	-0.0294635	0.977906	0.00970274	1 vs 2	0.990381	NS or Estimate < 0.5
CT47B1	-2.55799	0.400622	-6.38503	0.0030876	2.51038	1 vs 2	0.107384	P < 0.05
FKBP5	-0.660693	0.661452	-0.998852	0.374394	0.426671	1 vs 2	0.741711	NS or Estimate < 0.5
BORCS8	0.659093	0.844332	0.780609	0.478646	0.319986	1 vs 2	0.807005	NS or Estimate < 0.5
SH2B1	0.200961	0.490396	0.409794	0.702953	0.153073	1 vs 2	0.916275	NS or Estimate < 0.5
MTFR1	-1.86205	1.60587	-1.15953	0.31074	0.507602	1 vs 2	0.704576	NS or Estimate < 0.5
SCAPER	-0.0358697	0.930728	-0.0385393	0.971104	0.0127341	1 vs 2	0.989644	NS or Estimate < 0.5
SLC13A2	-0.155835	0.759655	-0.205139	0.84748	0.0718707	1 vs 2	0.955342	NS or Estimate < 0.5
TJAP1	-0.879143	0.659465	-1.33312	0.253353	0.596273	1 vs 2	0.653574	NS or Estimate < 0.5
GORAB	0.113283	0.659283	0.171828	0.871916	0.0595256	1 vs 2	0.959864	NS or Estimate < 0.5
GLRA1	-0.599218	0.773696	-0.774488	0.481875	0.317066	1 vs 2	0.80943	NS or Estimate < 0.5
HSDL1	-0.350822	0.833749	-0.420777	0.695541	0.157677	1 vs 2	0.911356	NS or Estimate < 0.5
CLDN14	-1.41504	0.471405	-3.00175	0.0398732	1.39932	1 vs 2	0.320672	P < 0.05
FAN1	-1.32736	0.222566	-5.9639	0.00396932	2.40128	1 vs 2	0.120558	P < 0.05
PTGR1	1.08225	0.765948	1.41295	0.230543	0.637247	1 vs 2	0.640203	NS or Estimate < 0.5
FAM25A	-0.553383	0.386175	-1.43299	0.225147	0.647534	1 vs 2	0.636284	NS or Estimate < 0.5
TRIM77	-0.471679	0.646118	-0.73002	0.505832	0.295993	1 vs 2	0.820455	NS or Estimate < 0.5
ZNF407	0.113283	1.09938	0.103043	0.922888	0.034851	1 vs 2	0.973374	NS or Estimate < 0.5
PIP4K2C	-0.0310365	0.747647	-0.0415122	0.968877	0.0137313	1 vs 2	0.989644	NS or Estimate < 0.5
GPR85	-0.748371	0.806521	-0.9279	0.405981	0.391494	1 vs 2	0.762933	NS or Estimate < 0.5
TCF7L2	1.89992	0.510897	3.71878	0.0204963	1.68833	1 vs 2	0.248117	P < 0.05
SRP54	0.77995	0.275754	2.82843	0.0474207	1.32403	1 vs 2	0.330914	P < 0.05
P3H1	-0.886717	0.624894	-1.41899	0.228904	0.640346	1 vs 2	0.640203	NS or Estimate < 0.5
MYOCD	-0.307728	0.803505	-0.382982	0.721215	0.141935	1 vs 2	0.918424	NS or Estimate < 0.5
SPSB2	-0.943358	0.570297	-1.65415	0.173439	0.760853	1 vs 2	0.575862	NS or Estimate < 0.5
GRAMD2B	0.534295	0.42135	1.26805	0.273562	0.562945	1 vs 2	0.672794	NS or Estimate < 0.5
TMEM88B	-1.8225	0.297084	-6.13463	0.00357873	2.44627	1 vs 2	0.115215	P < 0.05
KDM4C	0.672641	0.527543	1.27504	0.271318	0.566521	1 vs 2	0.669978	NS or Estimate < 0.5
RBM19	-0.0817042	0.546134	-0.149605	0.888317	0.0514322	1 vs 2	0.963485	NS or Estimate < 0.5
ANK3	0.358939	0.645642	0.55594	0.607881	0.216182	1 vs 2	0.872444	NS or Estimate < 0.5
ANPEP	0.220593	0.720679	0.30609	0.774806	0.110807	1 vs 2	0.93554	NS or Estimate < 0.5
ANXA4	0.339307	0.492475	0.688984	0.528716	0.276778	1 vs 2	0.826495	NS or Estimate < 0.5
ANXA5	2.28078	0.249084	9.15667	0.000789651	3.10256	1 vs 2	0.0550675	P < 0.05
SEPTIN12	-0.276692	0.386175	-0.716493	0.513294	0.289634	1 vs 2	0.820455	NS or Estimate < 0.5
ANXA6	1.30827	0.513022	2.55013	0.063297	1.19862	1 vs 2	0.36907	NS or Estimate < 0.5
ANXA7	0.446617	0.674899	0.661753	0.544307	0.264156	1 vs 2	0.834831	NS or Estimate < 0.5
ZNF716	-0.553383	0.850628	-0.650559	0.550809	0.258999	1 vs 2	0.841121	NS or Estimate < 0.5
MTHFSD	0.77995	0.194988	4	0.0161301	1.79236	1 vs 2	0.22341	P < 0.05
ZNF727	0.0256052	0.946891	0.0270413	0.979722	0.0088971	1 vs 2	0.990817	NS or Estimate < 0.5
BIVM	-0.660693	0.937103	-0.705038	0.519676	0.284268	1 vs 2	0.823495	NS or Estimate < 0.5
SH3YL1	-0.648517	1.01056	-0.641742	0.555968	0.25495	1 vs 2	0.843751	NS or Estimate < 0.5
MCTP2	-0.0817042	0.779301	-0.104843	0.921547	0.0354823	1 vs 2	0.972911	NS or Estimate < 0.5
SYNCRIP	1.22059	0.687791	1.77466	0.150619	0.822119	1 vs 2	0.542568	NS or Estimate < 0.5
BUD13	1.02561	0.350181	2.92879	0.0428655	1.36789	1 vs 2	0.32804	P < 0.05
CANT1	0.974938	0.556154	1.753	0.154474	0.811145	1 vs 2	0.545734	NS or Estimate < 0.5
EVI5L	-0.415037	0.410208	-1.01177	0.368876	0.433119	1 vs 2	0.741711	NS or Estimate < 0.5
EPS15	0.951474	0.776812	1.22485	0.28783	0.540864	1 vs 2	0.684772	NS or Estimate < 0.5
CLDN10	-1.22005	0.948512	-1.28628	0.267749	0.572272	1 vs 2	0.669978	NS or Estimate < 0.5
C15orf40	1.04907	0.625542	1.67705	0.168838	0.772531	1 vs 2	0.572832	NS or Estimate < 0.5
MGAT4A	-0.132372	0.638978	-0.207162	0.846002	0.0726284	1 vs 2	0.955342	NS or Estimate < 0.5
SLC25A13	-1.61002	0.570297	-2.82314	0.047676	1.3217	1 vs 2	0.330914	P < 0.05
RNF170	0.70707	0.27149	2.60441	0.0597704	1.22351	1 vs 2	0.359814	NS or Estimate < 0.5
SPG11	0.0256052	0.519141	0.0493223	0.963027	0.0163615	1 vs 2	0.989029	NS or Estimate < 0.5
SETD6	1.22059	0.416783	2.92861	0.0428734	1.36781	1 vs 2	0.32804	P < 0.05
TRAPPC9	1.50326	0.349508	4.30108	0.0126349	1.89843	1 vs 2	0.206971	P < 0.05
POLR3B	-0.145919	0.619962	-0.235368	0.825482	0.0832923	1 vs 2	0.951003	NS or Estimate < 0.5
NPTN	0.641604	0.528321	1.21442	0.291377	0.535545	1 vs 2	0.687127	NS or Estimate < 0.5
CYB561A3	-0.415037	0.275754	-1.5051	0.20675	0.684554	1 vs 2	0.613818	NS or Estimate < 0.5
JMJD4	0.308271	0.850628	0.362404	0.735386	0.133484	1 vs 2	0.920156	NS or Estimate < 0.5
PLEKHD1	-0.307728	0.552519	-0.556955	0.607249	0.216633	1 vs 2	0.872444	NS or Estimate < 0.5
MAFF	-1.0817	0.958548	-1.12848	0.322216	0.491853	1 vs 2	0.704759	NS or Estimate < 0.5
SAMD4A	2.09802	1.2528	1.67466	0.169313	0.77131	1 vs 2	0.574066	NS or Estimate < 0.5
DUS3L	-0.502716	0.68796	-0.730734	0.505441	0.29633	1 vs 2	0.820455	NS or Estimate < 0.5
KDM4E	-2.47168	0.261159	-9.46426	0.000695268	3.15785	1 vs 2	0.0550675	P < 0.05
WWC1	-0.0817042	0.953978	-0.0856458	0.935864	0.0287874	1 vs 2	0.977509	NS or Estimate < 0.5
FXN	0.113283	0.624894	0.181284	0.86496	0.063004	1 vs 2	0.959633	NS or Estimate < 0.5
AHCY	0.0490683	0.659465	0.0744062	0.94426	0.0249086	1 vs 2	0.981035	NS or Estimate < 0.5
SPATA48	-1.22005	0.546134	-2.23398	0.0892163	1.04956	1 vs 2	0.422381	NS or Estimate < 0.5
PDCD6IP	2.12889	0.296695	7.17534	0.00199774	2.69946	1 vs 2	0.086844	P < 0.05
SH3D21	-2.66667	0.239081	-11.1538	0.000367735	3.43447	1 vs 2	0.043887	FDR < 0.05
KIAA0040	0.887259	0.169149	5.24543	0.00631685	2.1995	1 vs 2	0.149857	P < 0.05
PLXNB3	-1.13835	0.462739	-2.46002	0.06969	1.15683	1 vs 2	0.386867	NS or Estimate < 0.5
PCYT1B	-1.61002	0.360903	-4.46111	0.0111508	1.95269	1 vs 2	0.192501	P < 0.05
FBXL17	-0.22005	0.863514	-0.254831	0.811419	0.0907547	1 vs 2	0.949535	NS or Estimate < 0.5
CCDC120	-0.943358	0.528321	-1.78558	0.148715	0.827647	1 vs 2	0.538729	NS or Estimate < 0.5
RAB2B	-0.00757336	0.535305	-0.0141477	0.98939	0.00463264	1 vs 2	0.995259	NS or Estimate < 0.5
FAM172A	0.130772	0.94287	0.138696	0.896393	0.0475017	1 vs 2	0.964846	NS or Estimate < 0.5
ZNF580	-1.27669	0.656661	-1.94422	0.123776	0.907363	1 vs 2	0.492878	NS or Estimate < 0.5
TWNK	0.715735	0.569019	1.25784	0.276873	0.55772	1 vs 2	0.675893	NS or Estimate < 0.5
VSIG10L	-1.13835	0.462739	-2.46002	0.06969	1.15683	1 vs 2	0.386867	NS or Estimate < 0.5
FAM170A	-0.415037	0.942809	-0.440214	0.682525	0.165882	1 vs 2	0.902248	NS or Estimate < 0.5
APBB1	-1.27669	0.462739	-2.75899	0.0509023	1.29326	1 vs 2	0.338038	NS or Estimate < 0.5
PPP6R3	1.18741	1.02519	1.15824	0.311211	0.506945	1 vs 2	0.704576	NS or Estimate < 0.5
PLIN3	0.918296	0.79473	1.15548	0.312215	0.505547	1 vs 2	0.704759	NS or Estimate < 0.5
DDHD2	-0.22005	0.948512	-0.231995	0.827928	0.0820077	1 vs 2	0.95132	NS or Estimate < 0.5
ODR4	-0.327359	0.618764	-0.529054	0.624766	0.204283	1 vs 2	0.875593	NS or Estimate < 0.5
PRR29	-1.24351	1.20821	-1.02922	0.361539	0.441845	1 vs 2	0.741711	NS or Estimate < 0.5
TRAF3IP2	-0.553383	0.441867	-1.25238	0.27866	0.554926	1 vs 2	0.676545	NS or Estimate < 0.5
FLNB	0.77995	0.609388	1.27989	0.269773	0.569002	1 vs 2	0.669978	NS or Estimate < 0.5
BRD8	-0.85568	0.440643	-1.94189	0.124107	0.906202	1 vs 2	0.492878	NS or Estimate < 0.5
MRGPRG	-1.27669	0.510393	-2.50139	0.0666676	1.17609	1 vs 2	0.379885	NS or Estimate < 0.5
FAM180B	-1.55338	0.441867	-3.5155	0.0245496	1.60996	1 vs 2	0.270431	P < 0.05
MTF2	0.220593	0.699961	0.31515	0.768404	0.11441	1 vs 2	0.933005	NS or Estimate < 0.5
ARHGAP40	-0.276692	0.462739	-0.597944	0.582085	0.235013	1 vs 2	0.85702	NS or Estimate < 0.5
SHISAL2B	-1.16938	0.481857	-2.42682	0.0722283	1.14129	1 vs 2	0.389184	NS or Estimate < 0.5
C5orf63	-0.350822	0.376969	-0.930641	0.40472	0.392845	1 vs 2	0.762252	NS or Estimate < 0.5
CFAP44	-0.879143	0.659465	-1.33312	0.253353	0.596273	1 vs 2	0.653574	NS or Estimate < 0.5
IYD	-1.52235	0.587238	-2.59238	0.0605316	1.21802	1 vs 2	0.363119	NS or Estimate < 0.5
ZNF605	0.358939	0.554738	0.647041	0.552863	0.257382	1 vs 2	0.84167	NS or Estimate < 0.5
ARHGAP4	-0.415037	1.04638	-0.39664	0.711884	0.147591	1 vs 2	0.918424	NS or Estimate < 0.5
NPAS3	-1.384	0.303023	-4.56732	0.0102817	1.98794	1 vs 2	0.18605	P < 0.05
ACIN1	1.85408	0.339462	5.46182	0.00546369	2.26251	1 vs 2	0.141945	P < 0.05
FXYD6	-0.610025	0.624687	-0.976529	0.384096	0.41556	1 vs 2	0.749312	NS or Estimate < 0.5
TMEM41B	-3.24566	0.806846	-4.02265	0.0158297	1.80053	1 vs 2	0.22341	P < 0.05
HERC6	-1.15583	0.976729	-1.18337	0.302186	0.519726	1 vs 2	0.697769	NS or Estimate < 0.5
LDHA	2.12074	0.633355	3.34842	0.0286108	1.54347	1 vs 2	0.290247	P < 0.05
ZNF268	0.0566417	0.502143	0.1128	0.915624	0.0382831	1 vs 2	0.970829	NS or Estimate < 0.5
MKS1	-0.138346	0.739906	-0.186978	0.860779	0.0651084	1 vs 2	0.957042	NS or Estimate < 0.5
DAG1	0.446617	0.694597	0.642987	0.555238	0.255521	1 vs 2	0.842838	NS or Estimate < 0.5
STARD3	-0.189014	0.554738	-0.340726	0.750454	0.124676	1 vs 2	0.922438	NS or Estimate < 0.5
HES7	-0.358396	1.00538	-0.356479	0.739491	0.131067	1 vs 2	0.920156	NS or Estimate < 0.5
PROM2	-0.660693	0.481857	-1.37114	0.242225	0.615782	1 vs 2	0.64548	NS or Estimate < 0.5
BIRC2	-0.610025	0.839456	-0.726691	0.507661	0.294426	1 vs 2	0.820455	NS or Estimate < 0.5
EPB41	-0.0250625	0.570297	-0.0439464	0.967053	0.0145495	1 vs 2	0.989644	NS or Estimate < 0.5
NDUFS2	1.11328	0.528321	2.10721	0.102813	0.987951	1 vs 2	0.445525	NS or Estimate < 0.5
HAUS4	0.446617	0.850628	0.525044	0.627309	0.202519	1 vs 2	0.878198	NS or Estimate < 0.5
ARHGAP25	-0.438501	0.817699	-0.536262	0.620211	0.20746	1 vs 2	0.875396	NS or Estimate < 0.5
RGMA	0.789866	0.619962	1.27405	0.271635	0.566015	1 vs 2	0.670115	NS or Estimate < 0.5
SLC26A11	-0.886717	0.646118	-1.37238	0.241871	0.616416	1 vs 2	0.64548	NS or Estimate < 0.5
SHMT2	-1.61002	0.727035	-2.21451	0.0911675	1.04016	1 vs 2	0.423476	NS or Estimate < 0.5
MTUS1	-0.253229	0.746401	-0.339266	0.751473	0.124087	1 vs 2	0.923272	NS or Estimate < 0.5
SMOC2	-0.36437	0.610347	-0.596988	0.582664	0.234582	1 vs 2	0.85702	NS or Estimate < 0.5
EHHADH	-0.748371	0.502143	-1.49036	0.210384	0.676987	1 vs 2	0.617874	NS or Estimate < 0.5
MPP1	-0.886717	0.386175	-2.29615	0.083291	1.0794	1 vs 2	0.418974	NS or Estimate < 0.5
FAM122B	-0.886717	0.386175	-2.29615	0.083291	1.0794	1 vs 2	0.418974	NS or Estimate < 0.5
AFF1	-0.586562	0.786187	-0.746084	0.497076	0.303577	1 vs 2	0.817974	NS or Estimate < 0.5
FAM104B	0.413438	0.688976	0.600076	0.580795	0.235977	1 vs 2	0.85702	NS or Estimate < 0.5
XIAP	0.659093	0.421859	1.56235	0.193237	0.713909	1 vs 2	0.596139	NS or Estimate < 0.5
CAAP1	0.251629	0.502143	0.501111	0.642614	0.19205	1 vs 2	0.884268	NS or Estimate < 0.5
NEU4	-0.0310365	0.816263	-0.0380226	0.971492	0.0125609	1 vs 2	0.989644	NS or Estimate < 0.5
RAB35	0.715735	0.411195	1.74062	0.156724	0.804865	1 vs 2	0.549711	NS or Estimate < 0.5
DMAC2	0.0566417	0.945795	0.0598879	0.955118	0.0199431	1 vs 2	0.987011	NS or Estimate < 0.5
CMSS1	-0.660693	0.674252	-0.97989	0.382622	0.417231	1 vs 2	0.749312	NS or Estimate < 0.5
TNFAIP8L1	-0.748371	0.471405	-1.58753	0.187584	0.726804	1 vs 2	0.588781	NS or Estimate < 0.5
TMEM178A	-0.610025	0.546134	-1.11699	0.326562	0.486034	1 vs 2	0.705616	NS or Estimate < 0.5
KCTD7	1.55393	0.507324	3.06299	0.0375489	1.4254	1 vs 2	0.314928	P < 0.05
BIRC5	1.02561	0.166688	6.15284	0.00353993	2.45101	1 vs 2	0.114324	P < 0.05
C3orf80	-0.0817042	0.333333	-0.245112	0.818431	0.087018	1 vs 2	0.949535	NS or Estimate < 0.5
TBC1D17	0.887259	0.618576	1.43436	0.224781	0.64824	1 vs 2	0.636284	NS or Estimate < 0.5
WWTR1	1.67389	0.657565	2.54559	0.0636022	1.19653	1 vs 2	0.369872	NS or Estimate < 0.5
EDN1	-0.307728	0.674252	-0.4564	0.671785	0.172769	1 vs 2	0.899214	NS or Estimate < 0.5
TESC	-0.805012	0.570297	-1.41157	0.230921	0.636537	1 vs 2	0.640203	NS or Estimate < 0.5
TTC39B	-0.307728	0.552519	-0.556955	0.607249	0.216633	1 vs 2	0.872444	NS or Estimate < 0.5
KRTCAP3	0.77995	0.609388	1.27989	0.269773	0.569002	1 vs 2	0.669978	NS or Estimate < 0.5
CUL7	-0.943358	0.782596	-1.20542	0.294472	0.530956	1 vs 2	0.689113	NS or Estimate < 0.5
BEX2	0.382402	0.468639	0.815984	0.460313	0.336947	1 vs 2	0.797703	NS or Estimate < 0.5
PDZD3	-0.415037	0.471405	-0.880427	0.428348	0.368203	1 vs 2	0.770426	NS or Estimate < 0.5
IFT46	1.15178	0.855825	1.34581	0.249584	0.602783	1 vs 2	0.653095	NS or Estimate < 0.5
SAP25	0.113283	0.836386	0.135444	0.898803	0.0463353	1 vs 2	0.96596	NS or Estimate < 0.5
AQP7	-0.22005	0.693375	-0.317361	0.766845	0.115292	1 vs 2	0.933005	NS or Estimate < 0.5
TJP2	1.25163	0.471405	2.65511	0.0566789	1.24658	1 vs 2	0.355141	NS or Estimate < 0.5
DZIP1L	-0.85568	0.21852	-3.9158	0.0173089	1.76173	1 vs 2	0.232066	P < 0.05
HHAT	0.308271	0.739906	0.416635	0.698332	0.155938	1 vs 2	0.912741	NS or Estimate < 0.5
LAS1L	-0.0817042	0.546134	-0.149605	0.888317	0.0514322	1 vs 2	0.963485	NS or Estimate < 0.5
MFSD5	0.200961	0.68796	0.292112	0.784725	0.105282	1 vs 2	0.937326	NS or Estimate < 0.5
ZNF736	-0.0817042	0.333333	-0.245112	0.818431	0.087018	1 vs 2	0.949535	NS or Estimate < 0.5
STRBP	-1.11005	0.601622	-1.84509	0.138776	0.857684	1 vs 2	0.521491	NS or Estimate < 0.5
PET100	-0.85568	0.804068	-1.06419	0.34722	0.459396	1 vs 2	0.727299	NS or Estimate < 0.5
ZMYM3	1.02561	0.429286	2.3891	0.0752416	1.12354	1 vs 2	0.400172	NS or Estimate < 0.5
UBAP1	-1.27669	0.648782	-1.96783	0.120469	0.919125	1 vs 2	0.486619	NS or Estimate < 0.5
ZEB2	-0.553383	0.624687	-0.885857	0.425739	0.370856	1 vs 2	0.770426	NS or Estimate < 0.5
C3orf52	-0.994026	0.443189	-2.2429	0.0883379	1.05385	1 vs 2	0.421296	NS or Estimate < 0.5
NUDT16	-0.384001	0.75751	-0.506925	0.638876	0.194584	1 vs 2	0.884268	NS or Estimate < 0.5
KXD1	-0.660693	0.481857	-1.37114	0.242225	0.615782	1 vs 2	0.64548	NS or Estimate < 0.5
AGA	0.77995	0.441867	1.76512	0.152303	0.81729	1 vs 2	0.542994	NS or Estimate < 0.5
TBP	-0.358396	0.782596	-0.457958	0.670757	0.173435	1 vs 2	0.899214	NS or Estimate < 0.5
ZNF540	1.28078	0.249084	5.14197	0.00678205	2.16864	1 vs 2	0.154674	P < 0.05
MASTL	0.0256052	0.983942	0.0260231	0.980485	0.00855885	1 vs 2	0.991357	NS or Estimate < 0.5
PLS3	-0.340907	0.668643	-0.509849	0.637001	0.19586	1 vs 2	0.884268	NS or Estimate < 0.5
KCNJ13	0.446617	0.462739	0.96516	0.389121	0.409916	1 vs 2	0.75087	NS or Estimate < 0.5
EFHC1	0.446617	0.919491	0.485722	0.652571	0.185372	1 vs 2	0.8872	NS or Estimate < 0.5
KLHL7	0.308271	0.710137	0.434101	0.686604	0.163293	1 vs 2	0.904957	NS or Estimate < 0.5
GOLGA3	-0.169382	0.747647	-0.226554	0.831877	0.0799407	1 vs 2	0.95235	NS or Estimate < 0.5
TECPR2	0.339307	0.481857	0.704166	0.520163	0.28386	1 vs 2	0.823505	NS or Estimate < 0.5
ZFP62	-0.0310365	0.816263	-0.0380226	0.971492	0.0125609	1 vs 2	0.989644	NS or Estimate < 0.5
ZNF177	-0.0817042	0.471405	-0.173321	0.870817	0.0600733	1 vs 2	0.959864	NS or Estimate < 0.5
ZFYVE28	-0.836049	0.309274	-2.70326	0.0539121	1.26831	1 vs 2	0.346832	NS or Estimate < 0.5
RAB40C	0.641604	0.528321	1.21442	0.291377	0.535545	1 vs 2	0.687127	NS or Estimate < 0.5
TSFM	-0.22005	0.577575	-0.38099	0.722582	0.141113	1 vs 2	0.918424	NS or Estimate < 0.5
SLC38A6	-0.610025	0.948512	-0.643139	0.555148	0.255591	1 vs 2	0.842838	NS or Estimate < 0.5
PGM1	1.22059	0.692531	1.76251	0.152769	0.815965	1 vs 2	0.542994	NS or Estimate < 0.5
YTHDF2	1.41558	0.426111	3.32209	0.0293212	1.53282	1 vs 2	0.2946	P < 0.05
KIF21A	0.251629	0.333333	0.754888	0.492327	0.307747	1 vs 2	0.815068	NS or Estimate < 0.5
SP7	1.44662	0.612014	2.3637	0.0773504	1.11154	1 vs 2	0.405184	NS or Estimate < 0.5
ARHGEF9	0.715735	0.677365	1.05665	0.350265	0.455603	1 vs 2	0.731291	NS or Estimate < 0.5
NEBL	-0.123548	0.954401	-0.129451	0.903249	0.0441923	1 vs 2	0.968035	NS or Estimate < 0.5
MAN2B1	-0.22005	0.901855	-0.243997	0.819237	0.0865905	1 vs 2	0.950029	NS or Estimate < 0.5
MRRF	0.599761	0.654541	0.916307	0.411351	0.385787	1 vs 2	0.769519	NS or Estimate < 0.5
TXNRD3	-0.553383	0.694597	-0.796697	0.470239	0.327682	1 vs 2	0.80105	NS or Estimate < 0.5
DGCR2	0.0256052	0.648221	0.0395007	0.970384	0.0130563	1 vs 2	0.989644	NS or Estimate < 0.5
BRD7	0.918296	0.717464	1.27992	0.269764	0.569016	1 vs 2	0.669978	NS or Estimate < 0.5
SPAM1	0.251629	0.471405	0.533786	0.621773	0.206368	1 vs 2	0.875396	NS or Estimate < 0.5
OSBPL10	-0.0817042	0.563155	-0.145083	0.891662	0.0497996	1 vs 2	0.963485	NS or Estimate < 0.5
SERINC5	0.308271	0.462739	0.666188	0.541746	0.266204	1 vs 2	0.832466	NS or Estimate < 0.5
POLL	-1.0817	0.333333	-3.24511	0.0315211	1.5014	1 vs 2	0.296992	P < 0.05
LDHB	0.641604	0.436937	1.46841	0.215911	0.665724	1 vs 2	0.625504	NS or Estimate < 0.5
PRR7	-0.886717	0.694597	-1.27659	0.270824	0.567313	1 vs 2	0.669978	NS or Estimate < 0.5
DMXL2	0.77995	0.68087	1.14552	0.315871	0.50049	1 vs 2	0.704759	NS or Estimate < 0.5
GOLGA7	0.81696	0.816263	1.00085	0.373534	0.42767	1 vs 2	0.741711	NS or Estimate < 0.5
RABEPK	0.446617	0.536169	0.832978	0.451704	0.345146	1 vs 2	0.793262	NS or Estimate < 0.5
ARHGDIB	1.61412	0.595051	2.71257	0.0533952	1.2725	1 vs 2	0.346263	NS or Estimate < 0.5
ARL1	0.77995	0.275754	2.82843	0.0474207	1.32403	1 vs 2	0.330914	P < 0.05
SLC34A3	-0.805012	0.570297	-1.41157	0.230921	0.636537	1 vs 2	0.640203	NS or Estimate < 0.5
CPEB2	0.446617	0.441867	1.01075	0.369311	0.432608	1 vs 2	0.741711	NS or Estimate < 0.5
LGALS3	2.41558	0.770443	3.13531	0.0350054	1.45587	1 vs 2	0.306925	P < 0.05
MAMLD1	-0.22005	0.639823	-0.343923	0.748223	0.125969	1 vs 2	0.921926	NS or Estimate < 0.5
PPP2R2A	0.520747	0.886559	0.58738	0.588505	0.23025	1 vs 2	0.860805	NS or Estimate < 0.5
SUCLG2	-1.0817	0.546134	-1.98066	0.118712	0.925504	1 vs 2	0.483252	NS or Estimate < 0.5
CD33	0.113283	0.782596	0.144753	0.891906	0.0496807	1 vs 2	0.963485	NS or Estimate < 0.5
RIF1	-0.994026	0.85515	-1.1624	0.309699	0.509061	1 vs 2	0.704576	NS or Estimate < 0.5
KLF11	0.163951	0.851315	0.192586	0.856666	0.0671884	1 vs 2	0.957028	NS or Estimate < 0.5
SRPRA	0.77995	0.570297	1.36762	0.243234	0.613977	1 vs 2	0.64548	NS or Estimate < 0.5
SYCP3	0.446617	0.919491	0.485722	0.652571	0.185372	1 vs 2	0.8872	NS or Estimate < 0.5
PHETA1	0.308271	0.462739	0.666188	0.541746	0.266204	1 vs 2	0.832466	NS or Estimate < 0.5
BHMT2	-0.660693	0.481857	-1.37114	0.242225	0.615782	1 vs 2	0.64548	NS or Estimate < 0.5
STX3	1.02561	0.350181	2.92879	0.0428655	1.36789	1 vs 2	0.32804	P < 0.05
SYNJ2	0.113283	0.570297	0.198639	0.852233	0.0694419	1 vs 2	0.955342	NS or Estimate < 0.5
ZNF182	-0.974395	0.726291	-1.3416	0.250827	0.600626	1 vs 2	0.653095	NS or Estimate < 0.5
SCAMP5	0.0256052	0.440643	0.0581088	0.956449	0.0193382	1 vs 2	0.987011	NS or Estimate < 0.5
IGLL5	1.86259	0.72049	2.58518	0.0609934	1.21472	1 vs 2	0.363285	NS or Estimate < 0.5
SUFU	-0.276692	1.02806	-0.26914	0.801134	0.0962948	1 vs 2	0.945815	NS or Estimate < 0.5
ASGR2	-0.85568	0.519141	-1.64826	0.174644	0.757846	1 vs 2	0.575862	NS or Estimate < 0.5
ATP6AP1	-0.0250625	0.194988	-0.128534	0.90393	0.0438652	1 vs 2	0.968035	NS or Estimate < 0.5
ATR	-0.307728	0.163258	-1.88491	0.132527	0.877697	1 vs 2	0.510712	NS or Estimate < 0.5
GYG2	-0.276692	0.386175	-0.716493	0.513294	0.289634	1 vs 2	0.820455	NS or Estimate < 0.5
HADH	0.77995	0.570297	1.36762	0.243234	0.613977	1 vs 2	0.64548	NS or Estimate < 0.5
SLAMF6	-1.18901	0.750513	-1.58427	0.188308	0.725132	1 vs 2	0.589801	NS or Estimate < 0.5
PIGT	0.0256052	0.888422	0.028821	0.978388	0.00948889	1 vs 2	0.990541	NS or Estimate < 0.5
CTTN	1.40477	0.824837	1.70309	0.163761	0.78579	1 vs 2	0.563992	NS or Estimate < 0.5
CLTA	2.55526	0.364652	7.00739	0.00218348	2.66085	1 vs 2	0.0910028	P < 0.05
TMLHE	-0.415037	0.471405	-0.880427	0.428348	0.368203	1 vs 2	0.770426	NS or Estimate < 0.5
PRMT7	0.692272	0.607246	1.14002	0.317907	0.4977	1 vs 2	0.704759	NS or Estimate < 0.5
KLHDC4	-0.169382	1.00308	-0.168863	0.8741	0.0584391	1 vs 2	0.96165	NS or Estimate < 0.5
PHF8	-0.610025	0.631573	-0.965882	0.3888	0.410274	1 vs 2	0.75087	NS or Estimate < 0.5
CARD8	0.113283	0.782596	0.144753	0.891906	0.0496807	1 vs 2	0.963485	NS or Estimate < 0.5
PACSIN2	1.97306	0.633394	3.11505	0.0356969	1.44737	1 vs 2	0.308333	P < 0.05
RNF17	-0.805012	0.570297	-1.41157	0.230921	0.636537	1 vs 2	0.640203	NS or Estimate < 0.5
MARF1	0.274001	0.192633	1.4224	0.227983	0.642098	1 vs 2	0.639394	NS or Estimate < 0.5
NDUFA2	0.404773	0.793801	0.509917	0.636957	0.19589	1 vs 2	0.884268	NS or Estimate < 0.5
CLDN11	0.466248	1.02151	0.45643	0.671765	0.172782	1 vs 2	0.899214	NS or Estimate < 0.5
TUT7	0.446617	0.739906	0.603613	0.578659	0.237577	1 vs 2	0.855977	NS or Estimate < 0.5
ARHGDIA	0.587105	0.639003	0.918782	0.4102	0.387004	1 vs 2	0.76847	NS or Estimate < 0.5
NIT1	-0.0817042	0.78138	-0.104564	0.921755	0.0353844	1 vs 2	0.972911	NS or Estimate < 0.5
PLCXD2	-1.15583	0.916288	-1.26143	0.275704	0.559557	1 vs 2	0.67577	NS or Estimate < 0.5
CES3	1.22059	0.382448	3.19153	0.0331678	1.47928	1 vs 2	0.301843	P < 0.05
BACH1	-0.415037	0.602709	-0.68862	0.528922	0.276608	1 vs 2	0.826495	NS or Estimate < 0.5
BAK1	-0.169382	0.544104	-0.311305	0.771118	0.112879	1 vs 2	0.933005	NS or Estimate < 0.5
BCAT2	1.24406	0.781327	1.59224	0.186548	0.729209	1 vs 2	0.588781	NS or Estimate < 0.5
IFT80	-0.22005	0.194988	-1.12853	0.322196	0.491879	1 vs 2	0.704759	NS or Estimate < 0.5
RPH3AL	-0.943358	0.570297	-1.65415	0.173439	0.760853	1 vs 2	0.575862	NS or Estimate < 0.5
TAF6	-0.553383	0.694597	-0.796697	0.470239	0.327682	1 vs 2	0.80105	NS or Estimate < 0.5
ZNF674	0.113283	0.659283	0.171828	0.871916	0.0595256	1 vs 2	0.959864	NS or Estimate < 0.5
MTRNR2L1	1.52075	0.452704	3.35925	0.0283244	1.54784	1 vs 2	0.289157	P < 0.05
KRTAP9-1	-0.610025	0.570297	-1.06966	0.345024	0.46215	1 vs 2	0.726429	NS or Estimate < 0.5
CTH	-0.0817042	1.07699	-0.0758631	0.943171	0.0254097	1 vs 2	0.981035	NS or Estimate < 0.5
MTRNR2L5	1.08225	1.0044	1.0775	0.341902	0.466098	1 vs 2	0.724957	NS or Estimate < 0.5
ALS2CL	-0.85568	0.519141	-1.64826	0.174644	0.757846	1 vs 2	0.575862	NS or Estimate < 0.5
RALGPS1	0.446617	0.441867	1.01075	0.369311	0.432608	1 vs 2	0.741711	NS or Estimate < 0.5
DHX35	-0.502716	0.68796	-0.730734	0.505441	0.29633	1 vs 2	0.820455	NS or Estimate < 0.5
PLEKHA5	-2.49131	0.344672	-7.22807	0.00194349	2.71142	1 vs 2	0.0864949	P < 0.05
HYI	-0.943358	0.502143	-1.87867	0.133487	0.874562	1 vs 2	0.510815	NS or Estimate < 0.5
FAM193B	0.659093	0.512853	1.28515	0.268105	0.571695	1 vs 2	0.669978	NS or Estimate < 0.5
PIWIL1	-0.0250625	0.570297	-0.0439464	0.967053	0.0145495	1 vs 2	0.989644	NS or Estimate < 0.5
[truncated: 8,272 more rows]
