# Supplementary material for: Single nuclei chromatin accessibility and transcriptomic map of breast tissues of women of diverse genetic ancestry
Source: bioRxiv preprint, doi:10.1101/2023.10.04.560911, version 1 (2023-10-06)
Supplement: Table S19 [file 560911_file29.xlsx]

## Sheet: Sheet 1
Table S19: Gene expression differences in lobular epithelial cells between timepoints 1 and 2
Feature	Estimate	SE	tval	P	-log10_pval	Comparison	BH	sig_level
A2M	0.633371	1.07547	0.588925	0.587563	0.230945	1 vs 2	0.883526	NS or Estimate < 0.5
NAT2	-0.36437	0.373795	-0.974786	0.384863	0.414694	1 vs 2	0.79512	NS or Estimate < 0.5
ACADM	0.302297	0.598667	0.50495	0.640144	0.193722	1 vs 2	0.907177	NS or Estimate < 0.5
ACADS	0.0762729	0.765073	0.0996936	0.925384	0.0336779	1 vs 2	0.981787	NS or Estimate < 0.5
ACAT1	-1	0.639823	-1.56293	0.193105	0.714205	1 vs 2	0.645212	NS or Estimate < 0.5
PSEN1	-0.666667	0.333333	-2	0.116117	0.935106	1 vs 2	0.574247	NS or Estimate < 0.5
ADA	-0.754345	0.482555	-1.56323	0.193037	0.714359	1 vs 2	0.645212	NS or Estimate < 0.5
SGCA	0.528321	0.804364	0.656818	0.547167	0.26188	1 vs 2	0.869607	NS or Estimate < 0.5
AGL	-0.226024	0.486505	-0.464587	0.666389	0.176273	1 vs 2	0.915741	NS or Estimate < 0.5
ABCD1	-0.0310365	0.816263	-0.0380226	0.971492	0.0125609	1 vs 2	0.981787	NS or Estimate < 0.5
ALDOB	0.497284	0.569757	0.8728	0.432035	0.364481	1 vs 2	0.81584	NS or Estimate < 0.5
AMPD1	-0.633488	0.900423	-0.703545	0.520511	0.28357	1 vs 2	0.853665	NS or Estimate < 0.5
APOC3	-1.03104	0.532035	-1.93791	0.124676	0.904216	1 vs 2	0.588972	NS or Estimate < 0.5
APOE	-0.169382	0.589327	-0.287417	0.788069	0.103436	1 vs 2	0.957353	NS or Estimate < 0.5
ASL	-1.33333	0.471405	-2.82843	0.0474207	1.32403	1 vs 2	0.412424	P < 0.05
ASS1	0.887259	0.652444	1.3599	0.245463	0.610015	1 vs 2	0.695376	NS or Estimate < 0.5
ATM	1.60459	0.437912	3.66419	0.0215008	1.66755	1 vs 2	0.32193	P < 0.05
AVPR2	-0.0310365	0.645963	-0.0480468	0.963982	0.015931	1 vs 2	0.981787	NS or Estimate < 0.5
BTK	-0.697703	0.494257	-1.41162	0.230907	0.636564	1 vs 2	0.679905	NS or Estimate < 0.5
SERPING1	1.16395	0.924372	1.25918	0.276436	0.558405	1 vs 2	0.720375	NS or Estimate < 0.5
C3	1.9183	0.599325	3.20076	0.032877	1.48311	1 vs 2	0.362671	P < 0.05
CBS	-2.4595	0.678501	-3.62491	0.0222601	1.65247	1 vs 2	0.32193	P < 0.05
CD36	0.604594	0.528626	1.14371	0.31654	0.499572	1 vs 2	0.751124	NS or Estimate < 0.5
CDK4	0.881285	0.40896	2.15494	0.0974401	1.01126	1 vs 2	0.531162	NS or Estimate < 0.5
CDKN1C	0.968964	0.866372	1.11841	0.32602	0.486756	1 vs 2	0.758117	NS or Estimate < 0.5
LYST	-1.66667	0.626045	-2.66221	0.0562604	1.2498	1 vs 2	0.439755	NS or Estimate < 0.5
ERCC8	0.302297	0.779487	0.387815	0.717906	0.143932	1 vs 2	0.932216	NS or Estimate < 0.5
CLN3	-0.282666	0.387386	-0.729674	0.506022	0.29583	1 vs 2	0.84722	NS or Estimate < 0.5
COL1A1	-0.666667	0.579899	-1.14963	0.314359	0.502574	1 vs 2	0.74785	NS or Estimate < 0.5
COL1A2	1.93793	0.456732	4.24303	0.0132315	1.87839	1 vs 2	0.26978	P < 0.05
COL5A1	-0.226024	0.647563	-0.349038	0.74466	0.128042	1 vs 2	0.944972	NS or Estimate < 0.5
CPOX	1.35894	0.289	4.70222	0.00929313	2.03184	1 vs 2	0.237199	P < 0.05
CPT2	0.63563	0.692531	0.917836	0.41064	0.386539	1 vs 2	0.808836	NS or Estimate < 0.5
CST3	1.51692	0.92246	1.64442	0.175434	0.755887	1 vs 2	0.639907	NS or Estimate < 0.5
CSTB	2.34539	0.805356	2.91224	0.0435803	1.36071	1 vs 2	0.397487	P < 0.05
CYP2D6	0.302297	0.629991	0.479843	0.656398	0.182833	1 vs 2	0.912997	NS or Estimate < 0.5
DDB2	-0.892691	0.566388	-1.57611	0.190127	0.720955	1 vs 2	0.645212	NS or Estimate < 0.5
DLD	1.35894	0.883971	1.53731	0.199033	0.701075	1 vs 2	0.654731	NS or Estimate < 0.5
EMD	0.968964	0.505503	1.91683	0.127737	0.893683	1 vs 2	0.590701	NS or Estimate < 0.5
EPB42	0.63563	0.383326	1.6582	0.172618	0.762915	1 vs 2	0.639738	NS or Estimate < 0.5
EPHX1	1.23808	0.734123	1.68648	0.166981	0.777332	1 vs 2	0.636194	NS or Estimate < 0.5
ERCC5	0.302297	0.402001	0.751981	0.493891	0.306369	1 vs 2	0.83969	NS or Estimate < 0.5
EXT1	0.352965	0.562062	0.627981	0.564086	0.248654	1 vs 2	0.878685	NS or Estimate < 0.5
F5	-0.559357	0.558803	-1.00099	0.373475	0.427738	1 vs 2	0.792142	NS or Estimate < 0.5
FABP2	-1.33333	0.790875	-1.6859	0.167095	0.777036	1 vs 2	0.636194	NS or Estimate < 0.5
FANCA	-0.0310365	0.526242	-0.0589775	0.955799	0.0196335	1 vs 2	0.981787	NS or Estimate < 0.5
FAH	0.440643	0.65204	0.675791	0.536229	0.27065	1 vs 2	0.857806	NS or Estimate < 0.5
FECH	0.830618	1.00674	0.825053	0.455702	0.341319	1 vs 2	0.82599	NS or Estimate < 0.5
FGFR2	0.497284	0.916847	0.542386	0.616357	0.210167	1 vs 2	0.89684	NS or Estimate < 0.5
FH	0.766403	0.723869	1.05876	0.349409	0.456666	1 vs 2	0.780557	NS or Estimate < 0.5
FUCA1	0.63563	0.373795	1.70048	0.164263	0.784461	1 vs 2	0.634465	NS or Estimate < 0.5
FUT1	0.497284	0.898121	0.553694	0.60928	0.215183	1 vs 2	0.892701	NS or Estimate < 0.5
FUT6	-0.559357	0.555181	-1.00752	0.370684	0.430996	1 vs 2	0.792142	NS or Estimate < 0.5
GALC	-0.36437	0.789264	-0.461658	0.668317	0.175018	1 vs 2	0.915741	NS or Estimate < 0.5
GALT	-0.438501	0.841552	-0.521062	0.62984	0.20077	1 vs 2	0.905172	NS or Estimate < 0.5
GBE1	0.0762729	0.955357	0.079837	0.940202	0.026779	1 vs 2	0.981787	NS or Estimate < 0.5
GCDH	-0.641061	0.743902	-0.861756	0.437419	0.359103	1 vs 2	0.817803	NS or Estimate < 0.5
GJA1	-0.559357	0.417031	-1.34128	0.250921	0.600463	1 vs 2	0.696283	NS or Estimate < 0.5
GK	0.163951	0.652219	0.251374	0.813911	0.0894233	1 vs 2	0.959122	NS or Estimate < 0.5
GLI3	-0.0310365	0.526242	-0.0589775	0.955799	0.0196335	1 vs 2	0.981787	NS or Estimate < 0.5
GP9	-0.610025	0.938488	-0.650008	0.55113	0.258746	1 vs 2	0.870726	NS or Estimate < 0.5
GPI	-0.892691	0.671099	-1.33019	0.254229	0.594774	1 vs 2	0.697482	NS or Estimate < 0.5
GSN	1.78958	1.16477	1.53643	0.19924	0.700624	1 vs 2	0.655201	NS or Estimate < 0.5
MSH6	0.74294	0.773579	0.960393	0.391244	0.407553	1 vs 2	0.798252	NS or Estimate < 0.5
GUSB	-1.33333	0.603388	-2.20974	0.0916523	1.03786	1 vs 2	0.522057	NS or Estimate < 0.5
HADHA	-0.761918	1.15122	-0.661833	0.54426	0.264193	1 vs 2	0.866463	NS or Estimate < 0.5
HADHB	0.107309	0.677428	0.158407	0.881812	0.0546241	1 vs 2	0.980027	NS or Estimate < 0.5
HBG2	-0.559357	0.460898	-1.21362	0.291649	0.535139	1 vs 2	0.737853	NS or Estimate < 0.5
HGD	0.358939	0.91535	0.392133	0.714957	0.14572	1 vs 2	0.931075	NS or Estimate < 0.5
HK1	0.497284	0.569757	0.8728	0.432035	0.364481	1 vs 2	0.81584	NS or Estimate < 0.5
HK2	-0.771834	0.882837	-0.874266	0.431324	0.365196	1 vs 2	0.81584	NS or Estimate < 0.5
HPRT1	0.163951	0.698852	0.234601	0.826038	0.0829998	1 vs 2	0.959809	NS or Estimate < 0.5
HPS1	0.302297	0.387386	0.78035	0.478782	0.319862	1 vs 2	0.836278	NS or Estimate < 0.5
HSD11B2	0.604594	0.528626	1.14371	0.31654	0.499572	1 vs 2	0.751124	NS or Estimate < 0.5
HSD3B2	-0.226024	1.14249	-0.197835	0.852821	0.069142	1 vs 2	0.969587	NS or Estimate < 0.5
SGSH	-0.0310365	0.443189	-0.0700299	0.947531	0.0234065	1 vs 2	0.981787	NS or Estimate < 0.5
IDS	0.0256052	0.720841	0.0355213	0.973366	0.0117238	1 vs 2	0.981787	NS or Estimate < 0.5
IDUA	-0.892691	0.695568	-1.2834	0.26866	0.570797	1 vs 2	0.712244	NS or Estimate < 0.5
INSR	0.571415	0.813673	0.702266	0.521228	0.282972	1 vs 2	0.854568	NS or Estimate < 0.5
PDX1	0.302297	0.72274	0.418265	0.697233	0.156622	1 vs 2	0.923993	NS or Estimate < 0.5
ITGA6	0.0196312	0.450346	0.0435915	0.967319	0.0144301	1 vs 2	0.981787	NS or Estimate < 0.5
JAG1	0.163951	0.492685	0.33277	0.756017	0.121468	1 vs 2	0.947394	NS or Estimate < 0.5
JAK3	-1.0545	0.916796	-1.1502	0.314148	0.502866	1 vs 2	0.74785	NS or Estimate < 0.5
KRT12	-0.697703	0.507324	-1.37526	0.241047	0.617898	1 vs 2	0.688323	NS or Estimate < 0.5
KRT18	1.03641	0.253874	4.0824	0.0150688	1.82192	1 vs 2	0.274878	P < 0.05
LAMA3	1.7664	0.671529	2.63042	0.0581607	1.23537	1 vs 2	0.445136	NS or Estimate < 0.5
LAMB3	0.194988	0.839456	0.232278	0.827722	0.0821155	1 vs 2	0.959809	NS or Estimate < 0.5
SGCB	-1.22602	0.39799	-3.08054	0.0369123	1.43283	1 vs 2	0.373487	P < 0.05
LIPA	-0.697703	0.169149	-4.12478	0.0145556	1.83697	1 vs 2	0.26978	P < 0.05
MLH1	0.547952	0.942218	0.581555	0.592064	0.227631	1 vs 2	0.885332	NS or Estimate < 0.5
MTM1	0.63563	0.839337	0.757301	0.491031	0.308891	1 vs 2	0.838226	NS or Estimate < 0.5
MTR	1.40961	0.733613	1.92146	0.127058	0.895997	1 vs 2	0.589913	NS or Estimate < 0.5
MMUT	0.74294	0.773579	0.960393	0.391244	0.407553	1 vs 2	0.798252	NS or Estimate < 0.5
PTCH1	-0.0310365	0.615495	-0.0504252	0.962201	0.0167341	1 vs 2	0.981787	NS or Estimate < 0.5
NCF1	-0.641061	0.554738	-1.15561	0.312168	0.505612	1 vs 2	0.74785	NS or Estimate < 0.5
NDP	-0.169382	0.874928	-0.193596	0.855926	0.0675638	1 vs 2	0.97056	NS or Estimate < 0.5
NF1	-0.138346	0.386175	-0.358246	0.738265	0.131788	1 vs 2	0.944972	NS or Estimate < 0.5
PNP	0.163951	0.492685	0.33277	0.756017	0.121468	1 vs 2	0.947394	NS or Estimate < 0.5
NPC1	0.0762729	0.901172	0.0846374	0.936616	0.0284382	1 vs 2	0.981787	NS or Estimate < 0.5
OAT	0.458792	0.804302	0.570422	0.598906	0.222642	1 vs 2	0.887556	NS or Estimate < 0.5
PAX6	0.881285	0.708796	1.24335	0.281633	0.550316	1 vs 2	0.728415	NS or Estimate < 0.5
PCBD1	0.340789	0.779607	0.43713	0.684581	0.164575	1 vs 2	0.922342	NS or Estimate < 0.5
PDHA1	0.0762729	0.872607	0.087408	0.934548	0.0293983	1 vs 2	0.981787	NS or Estimate < 0.5
PEPD	-0.36437	0.373795	-0.974786	0.384863	0.414694	1 vs 2	0.79512	NS or Estimate < 0.5
PEX12	0.409606	0.262663	1.55944	0.193903	0.712414	1 vs 2	0.647188	NS or Estimate < 0.5
PEX6	0.0762729	0.752633	0.101341	0.924156	0.0342547	1 vs 2	0.981787	NS or Estimate < 0.5
PEX7	0.107309	0.823518	0.130306	0.902615	0.0444976	1 vs 2	0.981787	NS or Estimate < 0.5
PFKM	-0.805012	0.850628	-0.946375	0.397545	0.400614	1 vs 2	0.801018	NS or Estimate < 0.5
PGK1	-0.239571	0.88849	-0.269639	0.800777	0.0964886	1 vs 2	0.959122	NS or Estimate < 0.5
PHKA2	-0.666667	0.579899	-1.14963	0.314359	0.502574	1 vs 2	0.74785	NS or Estimate < 0.5
PHKB	0.163951	0.684662	0.239463	0.822517	0.0848552	1 vs 2	0.959809	NS or Estimate < 0.5
PHKG2	-0.754345	0.482555	-1.56323	0.193037	0.714359	1 vs 2	0.645212	NS or Estimate < 0.5
SERPINA1	-0.226024	0.93348	-0.24213	0.820587	0.0858756	1 vs 2	0.959809	NS or Estimate < 0.5
PKD2	-0.276692	0.710137	-0.389631	0.716665	0.144684	1 vs 2	0.931075	NS or Estimate < 0.5
PKP1	1.45056	0.776009	1.86925	0.134948	0.869835	1 vs 2	0.604741	NS or Estimate < 0.5
PLA2G2A	0.830618	0.509537	1.63014	0.178405	0.748593	1 vs 2	0.639907	NS or Estimate < 0.5
PLOD1	-1.0817	1.08175	-0.99996	0.373918	0.427224	1 vs 2	0.792142	NS or Estimate < 0.5
PMM2	-1.75434	0.245655	-7.14149	0.00203355	2.69174	1 vs 2	0.133195	P < 0.05
PMP22	0.228166	0.811057	0.281319	0.792419	0.101045	1 vs 2	0.958148	NS or Estimate < 0.5
PON2	1.3023	0.549492	2.37	0.0768209	1.11452	1 vs 2	0.483395	NS or Estimate < 0.5
POU3F4	-2	0.471405	-4.24264	0.0132356	1.87826	1 vs 2	0.26978	P < 0.05
PRNP	1.1504	0.38874	2.95932	0.0415826	1.38109	1 vs 2	0.390704	P < 0.05
PROC	-0.559357	0.675248	-0.828373	0.454023	0.342922	1 vs 2	0.82588	NS or Estimate < 0.5
PROS1	1.16395	0.593525	1.96108	0.121404	0.915767	1 vs 2	0.578938	NS or Estimate < 0.5
PTH	-0.892691	0.842704	-1.05932	0.349184	0.456946	1 vs 2	0.780557	NS or Estimate < 0.5
PTH1R	-0.421011	0.886265	-0.47504	0.659534	0.180763	1 vs 2	0.915358	NS or Estimate < 0.5
PTS	-0.966821	0.926079	-1.04399	0.355426	0.449251	1 vs 2	0.783453	NS or Estimate < 0.5
QDPR	-0.471679	0.855353	-0.551444	0.610685	0.214183	1 vs 2	0.893664	NS or Estimate < 0.5
RB1	-0.559357	0.694508	-0.8054	0.465739	0.331857	1 vs 2	0.835191	NS or Estimate < 0.5
PITX2	-0.36437	0.748443	-0.486837	0.651846	0.185855	1 vs 2	0.912997	NS or Estimate < 0.5
RS1	-0.138346	0.855353	-0.161741	0.879351	0.0558379	1 vs 2	0.980027	NS or Estimate < 0.5
ATXN1	-0.805012	0.957126	-0.841073	0.447648	0.349063	1 vs 2	0.82588	NS or Estimate < 0.5
SGCD	-0.276692	0.763792	-0.362261	0.735486	0.133426	1 vs 2	0.944972	NS or Estimate < 0.5
SLC2A2	-0.36437	0.60477	-0.602493	0.579335	0.23707	1 vs 2	0.882449	NS or Estimate < 0.5
SLC3A1	-1.03104	0.574099	-1.79592	0.146934	0.832877	1 vs 2	0.609195	NS or Estimate < 0.5
SLC5A1	-0.471679	0.905156	-0.521103	0.629814	0.200788	1 vs 2	0.905172	NS or Estimate < 0.5
SMN1	-1.3568	0.471026	-2.88052	0.0449898	1.34689	1 vs 2	0.402952	P < 0.05
SNCA	-0.559357	0.431329	-1.29682	0.264441	0.577672	1 vs 2	0.708467	NS or Estimate < 0.5
TCOF1	-0.36437	0.761817	-0.47829	0.657411	0.182163	1 vs 2	0.912997	NS or Estimate < 0.5
TIMP3	1.04309	1.00136	1.04168	0.356376	0.448091	1 vs 2	0.783453	NS or Estimate < 0.5
TPI1	-0.0445838	0.31638	-0.140919	0.894746	0.0483002	1 vs 2	0.981357	NS or Estimate < 0.5
TPM1	0.19713	0.362322	0.544072	0.615299	0.210914	1 vs 2	0.89684	NS or Estimate < 0.5
TPMT	0.830618	0.41972	1.97898	0.11894	0.92467	1 vs 2	0.574247	NS or Estimate < 0.5
TSC1	0.194988	0.894666	0.217945	0.838139	0.0766838	1 vs 2	0.963475	NS or Estimate < 0.5
UROS	-0.828476	0.896477	-0.924146	0.407713	0.389645	1 vs 2	0.808836	NS or Estimate < 0.5
XDH	0.63563	0.533491	1.19146	0.299336	0.52384	1 vs 2	0.744215	NS or Estimate < 0.5
XPA	0.440643	0.686643	0.641735	0.555972	0.254947	1 vs 2	0.872092	NS or Estimate < 0.5
AIRE	0.302297	0.593525	0.509324	0.637337	0.195631	1 vs 2	0.905172	NS or Estimate < 0.5
APOB	-0.559357	0.417031	-1.34128	0.250921	0.600463	1 vs 2	0.696283	NS or Estimate < 0.5
BLMH	0.0762729	1.03358	0.0737947	0.944717	0.0246984	1 vs 2	0.981787	NS or Estimate < 0.5
TPP1	-0.697703	0.666536	-1.04676	0.354292	0.450639	1 vs 2	0.783453	NS or Estimate < 0.5
COL5A2	-0.892691	0.755271	-1.18195	0.302691	0.519	1 vs 2	0.744215	NS or Estimate < 0.5
CTSK	-0.384001	0.840584	-0.456827	0.671503	0.172952	1 vs 2	0.915741	NS or Estimate < 0.5
CYBB	0.302297	0.593525	0.509324	0.637337	0.195631	1 vs 2	0.905172	NS or Estimate < 0.5
CYB5R3	0.723308	0.510393	1.41716	0.229399	0.639408	1 vs 2	0.679905	NS or Estimate < 0.5
ERCC2	-1.08768	0.634368	-1.71459	0.161571	0.791638	1 vs 2	0.634058	NS or Estimate < 0.5
G6PD	0.163951	0.527739	0.310667	0.771569	0.112625	1 vs 2	0.955622	NS or Estimate < 0.5
GM2A	1.83062	0.41972	4.36152	0.0120478	1.91909	1 vs 2	0.264382	P < 0.05
HLCS	-1.13835	0.986272	-1.15419	0.312686	0.504891	1 vs 2	0.74785	NS or Estimate < 0.5
HSD17B4	0.74294	0.584373	1.27134	0.272504	0.564628	1 vs 2	0.715723	NS or Estimate < 0.5
IFNGR1	0.63563	0.457942	1.38801	0.237441	0.624444	1 vs 2	0.688323	NS or Estimate < 0.5
IL2RA	-0.892691	0.258131	-3.45829	0.0258581	1.5874	1 vs 2	0.338297	P < 0.05
KRT17	1.90689	0.870441	2.19072	0.0936171	1.02864	1 vs 2	0.526244	NS or Estimate < 0.5
LTBP2	0.302297	0.601618	0.502473	0.641737	0.192643	1 vs 2	0.907177	NS or Estimate < 0.5
PAFAH1B1	1.13291	0.578458	1.95851	0.121763	0.914486	1 vs 2	0.579637	NS or Estimate < 0.5
MVK	1.35894	0.289	4.70222	0.00929313	2.03184	1 vs 2	0.237199	P < 0.05
NOTCH3	-0.664525	0.807245	-0.823201	0.456641	0.340426	1 vs 2	0.827399	NS or Estimate < 0.5
PAFAH2	-1.08768	0.635447	-1.71167	0.162123	0.790157	1 vs 2	0.634465	NS or Estimate < 0.5
PLEC	0.49552	0.400839	1.23621	0.284011	0.546665	1 vs 2	0.730111	NS or Estimate < 0.5
PSEN2	0.830618	0.719458	1.1545	0.312572	0.505051	1 vs 2	0.74785	NS or Estimate < 0.5
SLC10A2	0.302297	0.72274	0.418265	0.697233	0.156622	1 vs 2	0.923993	NS or Estimate < 0.5
SLC5A5	-1.13835	0.624687	-1.82227	0.142502	0.84618	1 vs 2	0.609195	NS or Estimate < 0.5
AK1	1.02561	0.431389	2.37745	0.0762007	1.11804	1 vs 2	0.480721	NS or Estimate < 0.5
ALPL	1.27126	0.757224	1.67884	0.168483	0.773443	1 vs 2	0.63779	NS or Estimate < 0.5
AMH	-0.25706	0.397217	-0.647153	0.552798	0.257434	1 vs 2	0.870726	NS or Estimate < 0.5
AMPD3	0.302297	0.395742	0.763873	0.487514	0.312013	1 vs 2	0.836278	NS or Estimate < 0.5
APP	0.977788	0.48918	1.99883	0.116272	0.934525	1 vs 2	0.574247	NS or Estimate < 0.5
APRT	-0.559357	0.546535	-1.02346	0.363946	0.438963	1 vs 2	0.7901	NS or Estimate < 0.5
AQP2	-1.22602	0.620016	-1.97741	0.119155	0.923889	1 vs 2	0.574247	NS or Estimate < 0.5
ARSA	0.0566417	0.765167	0.0740252	0.944544	0.0247776	1 vs 2	0.981787	NS or Estimate < 0.5
ATRX	-5.07726	0.311633	-16.2925	8.30567e-05	4.08063	1 vs 2	0.0348204	FDR < 0.05
C1QB	-0.471679	0.646118	-0.73002	0.505832	0.295993	1 vs 2	0.84706	NS or Estimate < 0.5
COL4A5	-0.226024	0.647563	-0.349038	0.74466	0.128042	1 vs 2	0.944972	NS or Estimate < 0.5
F12	0.302297	0.387386	0.78035	0.478782	0.319862	1 vs 2	0.836278	NS or Estimate < 0.5
FUT2	0.63563	0.713792	0.890498	0.42352	0.373126	1 vs 2	0.81584	NS or Estimate < 0.5
HEXA	0.604594	0.705596	0.856855	0.439825	0.35672	1 vs 2	0.820093	NS or Estimate < 0.5
HEXB	-0.892691	0.826278	-1.08038	0.340764	0.467546	1 vs 2	0.776309	NS or Estimate < 0.5
KCNJ11	-0.471679	0.983676	-0.479506	0.656618	0.182688	1 vs 2	0.912997	NS or Estimate < 0.5
KRT14	2.40075	0.650197	3.69234	0.0209757	1.67828	1 vs 2	0.32193	P < 0.05
LDLR	-0.697703	0.685021	-1.01851	0.366026	0.436488	1 vs 2	0.791387	NS or Estimate < 0.5
PMS1	-0.754345	0.672408	-1.12186	0.324715	0.488498	1 vs 2	0.758117	NS or Estimate < 0.5
TSC2	-0.892691	0.448497	-1.9904	0.117396	0.930346	1 vs 2	0.574247	NS or Estimate < 0.5
VHL	-0.313702	0.981208	-0.31971	0.76519	0.116231	1 vs 2	0.952084	NS or Estimate < 0.5
VWF	0.830618	0.640555	1.29672	0.264474	0.577617	1 vs 2	0.708467	NS or Estimate < 0.5
WRN	0.497284	0.706215	0.704155	0.52017	0.283855	1 vs 2	0.853378	NS or Estimate < 0.5
DCX	-1.07413	0.765947	-1.40236	0.233449	0.631807	1 vs 2	0.685002	NS or Estimate < 0.5
FCGR1A	-1.27669	0.593034	-2.15281	0.0976727	1.01023	1 vs 2	0.531866	NS or Estimate < 0.5
FCGR3A	-0.36437	0.584745	-0.623126	0.56697	0.24644	1 vs 2	0.879707	NS or Estimate < 0.5
CR1	0.497284	0.916847	0.542386	0.616357	0.210167	1 vs 2	0.89684	NS or Estimate < 0.5
CD55	-0.169382	0.844161	-0.200652	0.85076	0.0701928	1 vs 2	0.969587	NS or Estimate < 0.5
SLC11A1	-0.559357	0.750513	-0.7453	0.497501	0.303206	1 vs 2	0.840244	NS or Estimate < 0.5
GPX1	1.23808	0.653551	1.89439	0.131084	0.88245	1 vs 2	0.596735	NS or Estimate < 0.5
C7	0.107309	0.672427	0.159585	0.880942	0.0550527	1 vs 2	0.980027	NS or Estimate < 0.5
CD14	0.686298	0.141988	4.83348	0.00843992	2.07366	1 vs 2	0.236624	P < 0.05
IGFBP2	-1.63349	0.587546	-2.78019	0.0498089	1.30269	1 vs 2	0.419293	P < 0.05
ORM2	-0.175356	0.200317	-0.875396	0.430777	0.365747	1 vs 2	0.81584	NS or Estimate < 0.5
CD59	0.302297	0.701936	0.430661	0.688906	0.16184	1 vs 2	0.923324	NS or Estimate < 0.5
HPX	-0.805012	0.609388	-1.32102	0.256998	0.590071	1 vs 2	0.699912	NS or Estimate < 0.5
CD4	0.163951	0.492685	0.33277	0.756017	0.121468	1 vs 2	0.947394	NS or Estimate < 0.5
SLC11A2	-0.58282	0.511736	-1.13891	0.318319	0.497138	1 vs 2	0.753625	NS or Estimate < 0.5
IGF1	0.321928	0.275963	1.16656	0.308194	0.511176	1 vs 2	0.747033	NS or Estimate < 0.5
SERPINA5	-0.559357	0.486505	-1.14975	0.314315	0.502635	1 vs 2	0.74785	NS or Estimate < 0.5
NOS2	0.302297	0.741028	0.407943	0.704207	0.1523	1 vs 2	0.928907	NS or Estimate < 0.5
IFNAR1	1.3023	0.507324	2.56699	0.0621762	1.20638	1 vs 2	0.453837	NS or Estimate < 0.5
RFX2	-3.65449	0.655143	-5.57816	0.00506326	2.29557	1 vs 2	0.202333	P < 0.05
SOD2	-0.578218	0.720673	-0.802331	0.467322	0.330384	1 vs 2	0.836278	NS or Estimate < 0.5
GSR	-0.226024	0.712214	-0.317354	0.76685	0.11529	1 vs 2	0.95288	NS or Estimate < 0.5
IL13RA2	-0.0310365	0.387386	-0.0801176	0.939992	0.0268759	1 vs 2	0.981787	NS or Estimate < 0.5
TGFB1	0.163951	0.450741	0.363737	0.734465	0.134029	1 vs 2	0.944758	NS or Estimate < 0.5
RPL9	1.61875	0.702209	2.30523	0.0824637	1.08374	1 vs 2	0.501103	NS or Estimate < 0.5
ACY1	-0.943358	0.624894	-1.50963	0.205647	0.686877	1 vs 2	0.65587	NS or Estimate < 0.5
ADH5	-1.0965	0.902116	-1.21548	0.291015	0.536084	1 vs 2	0.737047	NS or Estimate < 0.5
ADH7	1.18358	1.49864	0.789772	0.473844	0.324365	1 vs 2	0.836278	NS or Estimate < 0.5
ADORA2B	-0.36437	0.773658	-0.47097	0.662198	0.179012	1 vs 2	0.915482	NS or Estimate < 0.5
ADRA1D	-0.36437	0.584745	-0.623126	0.56697	0.24644	1 vs 2	0.879707	NS or Estimate < 0.5
ADRB1	-2.19499	0.441867	-4.96753	0.00766494	2.11549	1 vs 2	0.227511	P < 0.05
AGTR2	-0.892691	0.70394	-1.26813	0.273536	0.562986	1 vs 2	0.715723	NS or Estimate < 0.5
ALDH2	-0.138346	0.501999	-0.27559	0.796514	0.0988064	1 vs 2	0.959062	NS or Estimate < 0.5
ALDH1B1	-0.559357	0.861282	-0.649447	0.551458	0.258488	1 vs 2	0.870726	NS or Estimate < 0.5
ALDH1A3	0.63563	0.83611	0.760223	0.489465	0.310279	1 vs 2	0.837242	NS or Estimate < 0.5
ALDH3B2	-3.97612	0.818693	-4.85667	0.00829925	2.08096	1 vs 2	0.236624	P < 0.05
ALDH9A1	1.48862	0.743086	2.00329	0.115681	0.936739	1 vs 2	0.574247	NS or Estimate < 0.5
ALOX12	-0.243513	1.04807	-0.232344	0.827675	0.0821403	1 vs 2	0.959809	NS or Estimate < 0.5
ALOX5	-0.36437	0.60477	-0.602493	0.579335	0.23707	1 vs 2	0.882449	NS or Estimate < 0.5
ANXA1	1.01206	0.759562	1.33242	0.253561	0.595918	1 vs 2	0.697482	NS or Estimate < 0.5
ATP1A1	1.40961	0.479334	2.94076	0.042357	1.37307	1 vs 2	0.392878	P < 0.05
ATP4A	-0.697703	0.814582	-0.856517	0.439992	0.356556	1 vs 2	0.820093	NS or Estimate < 0.5
AVPR1B	-0.892691	0.880776	-1.01353	0.368133	0.433996	1 vs 2	0.792142	NS or Estimate < 0.5
BCKDHA	0.214619	0.760088	0.28236	0.791675	0.101453	1 vs 2	0.957995	NS or Estimate < 0.5
BLVRA	0.302297	0.48905	0.618131	0.569947	0.244165	1 vs 2	0.880995	NS or Estimate < 0.5
TSPO	-1.03104	0.213309	-4.83354	0.00843957	2.07368	1 vs 2	0.236624	P < 0.05
CACNA2D1	0.74294	0.700796	1.06014	0.348852	0.457358	1 vs 2	0.780557	NS or Estimate < 0.5
CACNB3	0.497284	0.48905	1.01684	0.366733	0.43565	1 vs 2	0.792142	NS or Estimate < 0.5
CACNB4	0.63563	0.395742	1.60617	0.18351	0.73634	1 vs 2	0.644404	NS or Estimate < 0.5
CALCB	0.302297	0.395742	0.763873	0.487514	0.312013	1 vs 2	0.836278	NS or Estimate < 0.5
CHRM3	-1.16181	0.830428	-1.39905	0.234364	0.630109	1 vs 2	0.68671	NS or Estimate < 0.5
CHRNA3	-0.226024	0.736898	-0.306724	0.774357	0.111059	1 vs 2	0.955711	NS or Estimate < 0.5
CHRNB1	0.584963	0.639823	0.914257	0.412307	0.384779	1 vs 2	0.811498	NS or Estimate < 0.5
CHRNB4	-0.118715	0.872104	-0.136124	0.898299	0.0465791	1 vs 2	0.981787	NS or Estimate < 0.5
CYP2C8	-0.226024	0.851604	-0.26541	0.803811	0.0948461	1 vs 2	0.959122	NS or Estimate < 0.5
CYP2C18	-0.169382	0.554738	-0.305337	0.775339	0.110509	1 vs 2	0.955711	NS or Estimate < 0.5
CYP2E1	-0.892691	0.448497	-1.9904	0.117396	0.930346	1 vs 2	0.574247	NS or Estimate < 0.5
CYP2F1	-1.22602	0.39799	-3.08054	0.0369123	1.43283	1 vs 2	0.373487	P < 0.05
CYP27B1	-1.08768	0.949482	-1.14555	0.31586	0.500505	1 vs 2	0.750588	NS or Estimate < 0.5
DCK	0.561499	0.821602	0.68342	0.531875	0.27419	1 vs 2	0.857806	NS or Estimate < 0.5
DDC	-0.805012	0.962959	-0.835978	0.450197	0.346598	1 vs 2	0.82588	NS or Estimate < 0.5
DIO1	-0.559357	0.434258	-1.28808	0.267183	0.573192	1 vs 2	0.711823	NS or Estimate < 0.5
DRD4	-0.282666	0.39426	-0.716953	0.513039	0.28985	1 vs 2	0.852396	NS or Estimate < 0.5
DRD5	0.63563	0.732321	0.867967	0.434384	0.362126	1 vs 2	0.81584	NS or Estimate < 0.5
GABRA1	-0.559357	0.726291	-0.770155	0.48417	0.315002	1 vs 2	0.836278	NS or Estimate < 0.5
GABRB1	-0.892691	0.607203	-1.47017	0.215464	0.666625	1 vs 2	0.663574	NS or Estimate < 0.5
GAD1	-0.559357	0.787492	-0.710302	0.516735	0.286732	1 vs 2	0.852396	NS or Estimate < 0.5
GART	0.389975	0.321364	1.2135	0.291693	0.535074	1 vs 2	0.737853	NS or Estimate < 0.5
GAS6	-0.169382	0.984717	-0.172011	0.871781	0.0595927	1 vs 2	0.978566	NS or Estimate < 0.5
GGCX	0.547952	0.872	0.628385	0.563847	0.248839	1 vs 2	0.878578	NS or Estimate < 0.5
GRIA4	-0.805012	0.970437	-0.829536	0.453436	0.343484	1 vs 2	0.82588	NS or Estimate < 0.5
GRIK3	-0.226024	0.647563	-0.349038	0.74466	0.128042	1 vs 2	0.944972	NS or Estimate < 0.5
GRIN2A	-0.610025	0.726496	-0.839682	0.448343	0.34839	1 vs 2	0.82588	NS or Estimate < 0.5
GRIN2B	-1.30015	0.767164	-1.69476	0.165368	0.781548	1 vs 2	0.634688	NS or Estimate < 0.5
GRINA	-0.118715	1.08162	-0.109756	0.917889	0.0372098	1 vs 2	0.981787	NS or Estimate < 0.5
GRM4	0.302297	0.387386	0.78035	0.478782	0.319862	1 vs 2	0.836278	NS or Estimate < 0.5
GRM6	0.302297	0.395742	0.763873	0.487514	0.312013	1 vs 2	0.836278	NS or Estimate < 0.5
GSTA2	-0.892691	0.672427	-1.32757	0.255019	0.593427	1 vs 2	0.697482	NS or Estimate < 0.5
GSTM2	0.27126	0.364572	0.744052	0.498178	0.302616	1 vs 2	0.84025	NS or Estimate < 0.5
GSTM3	0.163951	0.492685	0.33277	0.756017	0.121468	1 vs 2	0.947394	NS or Estimate < 0.5
GSTM4	-1.22602	0.703935	-1.74167	0.156532	0.805397	1 vs 2	0.625275	NS or Estimate < 0.5
GSTT2	-0.559357	0.63912	-0.8752	0.430872	0.365652	1 vs 2	0.81584	NS or Estimate < 0.5
GUK1	1.18358	0.702897	1.68386	0.167494	0.776001	1 vs 2	0.636194	NS or Estimate < 0.5
HMGCR	0.904749	0.844887	1.07085	0.344549	0.462749	1 vs 2	0.780298	NS or Estimate < 0.5
HRH1	0.163951	0.563986	0.290701	0.78573	0.104727	1 vs 2	0.957229	NS or Estimate < 0.5
HSD3B1	0.723308	0.806521	0.896825	0.420509	0.376224	1 vs 2	0.81584	NS or Estimate < 0.5
HTR1B	-0.892691	0.448497	-1.9904	0.117396	0.930346	1 vs 2	0.574247	NS or Estimate < 0.5
HTR2C	-0.0310365	0.816263	-0.0380226	0.971492	0.0125609	1 vs 2	0.981787	NS or Estimate < 0.5
ICAM2	0.409606	0.226782	1.80617	0.145193	0.838054	1 vs 2	0.609195	NS or Estimate < 0.5
IGF1R	0.107309	0.408857	0.262462	0.805929	0.0937035	1 vs 2	0.959122	NS or Estimate < 0.5
IGF2R	1.44064	0.771315	1.86778	0.135179	0.869092	1 vs 2	0.604741	NS or Estimate < 0.5
IL2RB	-0.226024	0.647563	-0.349038	0.74466	0.128042	1 vs 2	0.944972	NS or Estimate < 0.5
IL7	-1.86165	0.138346	-13.4565	0.00017644	3.7534	1 vs 2	0.038554	FDR < 0.05
IMPDH1	0.904749	0.807404	1.12057	0.325204	0.487845	1 vs 2	0.758117	NS or Estimate < 0.5
IMPDH2	2.09974	0.556615	3.77233	0.019565	1.70852	1 vs 2	0.318434	P < 0.05
ITGA4	-0.697703	0.169149	-4.12478	0.0145556	1.83697	1 vs 2	0.26978	P < 0.05
ITGAX	-0.169382	0.674252	-0.251215	0.814025	0.0893621	1 vs 2	0.959122	NS or Estimate < 0.5
ITGB6	-0.610025	0.546134	-1.11699	0.326562	0.486034	1 vs 2	0.758117	NS or Estimate < 0.5
KLKB1	0.302297	0.395742	0.763873	0.487514	0.312013	1 vs 2	0.836278	NS or Estimate < 0.5
CYP4F3	0.302297	0.593525	0.509324	0.637337	0.195631	1 vs 2	0.905172	NS or Estimate < 0.5
MAOB	0.709761	0.991515	0.715835	0.513659	0.289325	1 vs 2	0.852396	NS or Estimate < 0.5
NQO2	-0.610025	0.308932	-1.97463	0.119534	0.922507	1 vs 2	0.575536	NS or Estimate < 0.5
NPY	-0.226024	0.499256	-0.452722	0.674217	0.1712	1 vs 2	0.915741	NS or Estimate < 0.5
OXT	-1.16938	0.597153	-1.95826	0.121797	0.914363	1 vs 2	0.579637	NS or Estimate < 0.5
OXTR	1.62806	0.671297	2.42524	0.0723519	1.14055	1 vs 2	0.472657	NS or Estimate < 0.5
P4HA1	0.63563	0.41972	1.51441	0.204488	0.689332	1 vs 2	0.65587	NS or Estimate < 0.5
P4HB	1.16495	0.854757	1.3629	0.244595	0.611552	1 vs 2	0.694881	NS or Estimate < 0.5
PAM	0.302297	0.395742	0.763873	0.487514	0.312013	1 vs 2	0.836278	NS or Estimate < 0.5
PC	-0.36437	0.533491	-0.682992	0.532119	0.273991	1 vs 2	0.857806	NS or Estimate < 0.5
PDE4C	-3.3568	0.237732	-14.1201	0.000146021	3.83558	1 vs 2	0.0374195	FDR < 0.05
PDHB	1.02561	0.569757	1.80007	0.146226	0.834976	1 vs 2	0.609195	NS or Estimate < 0.5
PGR	-1.42101	0.47841	-2.97028	0.0411329	1.38581	1 vs 2	0.389341	P < 0.05
ABCB1	-0.697703	0.408604	-1.70753	0.162912	0.788048	1 vs 2	0.634465	NS or Estimate < 0.5
PLA2G1B	0.302297	0.395742	0.763873	0.487514	0.312013	1 vs 2	0.836278	NS or Estimate < 0.5
PLA2G5	0.74294	0.521385	1.42494	0.2273	0.643401	1 vs 2	0.679905	NS or Estimate < 0.5
PLAT	-0.0310365	0.58284	-0.0532504	0.960086	0.01769	1 vs 2	0.981787	NS or Estimate < 0.5
POLR2A	0.163951	0.631364	0.259678	0.80793	0.0926261	1 vs 2	0.959122	NS or Estimate < 0.5
POLR2B	0.723308	0.674899	1.07173	0.344199	0.46319	1 vs 2	0.779993	NS or Estimate < 0.5
POR	0.968964	0.626388	1.54691	0.196792	0.705994	1 vs 2	0.649852	NS or Estimate < 0.5
PPIB	0.440643	0.686643	0.641735	0.555972	0.254947	1 vs 2	0.872092	NS or Estimate < 0.5
PPIC	0.63563	0.699961	0.908094	0.415192	0.381751	1 vs 2	0.813123	NS or Estimate < 0.5
PPP3R1	0.646437	0.879875	0.734693	0.503274	0.298196	1 vs 2	0.843994	NS or Estimate < 0.5
PRRG1	-0.226024	0.736898	-0.306724	0.774357	0.111059	1 vs 2	0.955711	NS or Estimate < 0.5
PTGDR	0.63563	0.41972	1.51441	0.204488	0.689332	1 vs 2	0.65587	NS or Estimate < 0.5
PTGDS	-0.559357	0.771315	-0.7252	0.508482	0.293725	1 vs 2	0.849123	NS or Estimate < 0.5
PTGER2	-0.118715	0.78138	-0.151929	0.886598	0.0522735	1 vs 2	0.980027	NS or Estimate < 0.5
PTGER3	-1.22602	0.406383	-3.01692	0.0392821	1.40581	1 vs 2	0.386057	P < 0.05
PTGS2	-1.13835	0.775653	-1.4676	0.21612	0.665305	1 vs 2	0.663574	NS or Estimate < 0.5
RARB	0.497284	0.569757	0.8728	0.432035	0.364481	1 vs 2	0.81584	NS or Estimate < 0.5
RPL4	2.14317	0.770787	2.7805	0.0497933	1.30283	1 vs 2	0.419293	P < 0.05
RPL5	1.16109	0.491381	2.36291	0.0774165	1.11117	1 vs 2	0.484739	NS or Estimate < 0.5
RPL6	2.16252	0.514375	4.20417	0.0136499	1.86487	1 vs 2	0.26978	P < 0.05
RPL7	1.60546	0.542299	2.96046	0.0415353	1.38158	1 vs 2	0.390704	P < 0.05
RPL7A	1.67035	0.72617	2.30022	0.082919	1.08135	1 vs 2	0.501919	NS or Estimate < 0.5
RPL12	0.662845	0.520664	1.27308	0.271948	0.565513	1 vs 2	0.715723	NS or Estimate < 0.5
RPL23	-0.472908	0.712731	-0.663514	0.543289	0.264969	1 vs 2	0.86505	NS or Estimate < 0.5
RPL18A	0.979624	0.628479	1.55872	0.194067	0.712049	1 vs 2	0.647232	NS or Estimate < 0.5
RPL19	2.09411	0.6647	3.15045	0.0344991	1.46219	1 vs 2	0.370006	P < 0.05
RPL21	1.48452	0.72912	2.03604	0.111444	0.952943	1 vs 2	0.563434	NS or Estimate < 0.5
RPL17	1.89527	0.642362	2.95047	0.0419497	1.37727	1 vs 2	0.39125	P < 0.05
RPL24	1.22961	0.46167	2.66341	0.0561905	1.25034	1 vs 2	0.439755	NS or Estimate < 0.5
RPL26	1.68798	0.745333	2.26473	0.0862284	1.06435	1 vs 2	0.510969	NS or Estimate < 0.5
RPL27	-0.12239	0.302989	-0.403944	0.706918	0.150631	1 vs 2	0.930179	NS or Estimate < 0.5
RPL30	1.36616	0.334324	4.08633	0.0150202	1.82332	1 vs 2	0.274878	P < 0.05
RPL28	1.56885	1.11124	1.4118	0.230858	0.636655	1 vs 2	0.679905	NS or Estimate < 0.5
RPL29	1.55482	0.597486	2.60228	0.0599043	1.22254	1 vs 2	0.449795	NS or Estimate < 0.5
RPL34	1.65315	0.573965	2.88022	0.0450031	1.34676	1 vs 2	0.402952	P < 0.05
RPL35A	0.353708	0.618131	0.572221	0.597797	0.223447	1 vs 2	0.886552	NS or Estimate < 0.5
RPL37	0.835471	0.536246	1.558	0.194232	0.711678	1 vs 2	0.647232	NS or Estimate < 0.5
RPL37A	1.24369	0.613671	2.02664	0.112643	0.948295	1 vs 2	0.565972	NS or Estimate < 0.5
RPL39	1.16327	0.618977	1.87935	0.133382	0.874904	1 vs 2	0.601276	NS or Estimate < 0.5
RPL36AL	-0.169382	1.03057	-0.164358	0.877421	0.0567921	1 vs 2	0.980027	NS or Estimate < 0.5
SLC2A9	1.16395	0.61732	1.88549	0.132439	0.877986	1 vs 2	0.600263	NS or Estimate < 0.5
CLDN20	0.830618	0.277447	2.99378	0.0401877	1.39591	1 vs 2	0.386057	P < 0.05
CD44	-0.522347	0.120628	-4.33023	0.0123475	1.90842	1 vs 2	0.266321	P < 0.05
TSR3	0.278834	0.858426	0.32482	0.761596	0.118275	1 vs 2	0.950395	NS or Estimate < 0.5
NCCRP1	1.07627	0.901172	1.1943	0.298338	0.525291	1 vs 2	0.744215	NS or Estimate < 0.5
STX16	0.352965	0.497965	0.708815	0.517565	0.286035	1 vs 2	0.85333	NS or Estimate < 0.5
UBE2W	-0.226024	0.31614	-0.714949	0.514151	0.28891	1 vs 2	0.852396	NS or Estimate < 0.5
NDUFV3	0.830618	0.789805	1.05167	0.352285	0.453106	1 vs 2	0.782171	NS or Estimate < 0.5
RORC	0.604594	0.646367	0.935371	0.402551	0.395179	1 vs 2	0.80573	NS or Estimate < 0.5
TM6SF2	0.163951	0.563986	0.290701	0.78573	0.104727	1 vs 2	0.957229	NS or Estimate < 0.5
GRB10	-0.0310365	0.766387	-0.0404971	0.969638	0.0133906	1 vs 2	0.981787	NS or Estimate < 0.5
GDF6	-0.0310365	0.443189	-0.0700299	0.947531	0.0234065	1 vs 2	0.981787	NS or Estimate < 0.5
GGA1	0.440643	0.686643	0.641735	0.555972	0.254947	1 vs 2	0.872092	NS or Estimate < 0.5
ALKBH2	0.968964	0.615495	1.57428	0.190537	0.72002	1 vs 2	0.645212	NS or Estimate < 0.5
OR2Y1	-0.0310365	0.213309	-0.1455	0.891354	0.04995	1 vs 2	0.980027	NS or Estimate < 0.5
OR2A14	0.937927	0.89592	1.04689	0.35424	0.450703	1 vs 2	0.783453	NS or Estimate < 0.5
ETFRF1	0.251629	0.726496	0.34636	0.746524	0.126956	1 vs 2	0.946829	NS or Estimate < 0.5
ZNF425	0.0762729	0.823977	0.0925667	0.930699	0.0311909	1 vs 2	0.981787	NS or Estimate < 0.5
SPOPL	-0.0620729	0.784551	-0.079119	0.940738	0.0265313	1 vs 2	0.981787	NS or Estimate < 0.5
ZNF470	-1.60245	0.653577	-2.45182	0.0703076	1.153	1 vs 2	0.46727	NS or Estimate < 0.5
ARHGEF37	-0.754345	0.686511	-1.09881	0.333545	0.476845	1 vs 2	0.767191	NS or Estimate < 0.5
MED11	-0.559357	0.662156	-0.844751	0.445815	0.350845	1 vs 2	0.82588	NS or Estimate < 0.5
C4orf3	0.830618	0.501091	1.65762	0.172735	0.76262	1 vs 2	0.639738	NS or Estimate < 0.5
ATP1B1	0.263268	0.356475	0.738531	0.501179	0.300007	1 vs 2	0.84238	NS or Estimate < 0.5
TOMM5	-1.37917	0.827648	-1.66637	0.170968	0.767085	1 vs 2	0.639738	NS or Estimate < 0.5
DENND6B	-0.226024	0.754997	-0.299371	0.779568	0.108146	1 vs 2	0.956648	NS or Estimate < 0.5
C8orf82	0.81707	0.726666	1.12441	0.323749	0.489791	1 vs 2	0.758117	NS or Estimate < 0.5
OR2T27	1.60459	0.437912	3.66419	0.0215008	1.66755	1 vs 2	0.32193	P < 0.05
OR2T35	0.107309	0.741028	0.144812	0.891863	0.0497017	1 vs 2	0.980038	NS or Estimate < 0.5
STX19	-0.559357	0.675248	-0.828373	0.454023	0.342922	1 vs 2	0.82588	NS or Estimate < 0.5
PIM3	0.450558	0.871956	0.516721	0.632606	0.198867	1 vs 2	0.905172	NS or Estimate < 0.5
TTC3	1.04798	0.408417	2.56595	0.0622451	1.2059	1 vs 2	0.454018	NS or Estimate < 0.5
OR4C15	-1.66667	0.173735	-9.59313	0.000659911	3.18051	1 vs 2	0.0761493	P < 0.05
PPARA	-0.559357	0.558803	-1.00099	0.373475	0.427738	1 vs 2	0.792142	NS or Estimate < 0.5
AFAP1L2	0.0256052	0.720841	0.0355213	0.973366	0.0117238	1 vs 2	0.981787	NS or Estimate < 0.5
ATP5F1A	0.655261	0.587949	1.11449	0.327514	0.484769	1 vs 2	0.759501	NS or Estimate < 0.5
OR4C13	-0.471679	0.694597	-0.679069	0.534355	0.27217	1 vs 2	0.857806	NS or Estimate < 0.5
PLEKHA1	-1.16938	0.509537	-2.29499	0.0833975	1.07885	1 vs 2	0.501963	NS or Estimate < 0.5
PAMR1	0.302297	0.779487	0.387815	0.717906	0.143932	1 vs 2	0.932216	NS or Estimate < 0.5
EXOSC10	-0.647035	0.998829	-0.647794	0.552423	0.257728	1 vs 2	0.870726	NS or Estimate < 0.5
RPLP0	0.0351454	0.778662	0.0451357	0.966163	0.0149498	1 vs 2	0.981787	NS or Estimate < 0.5
GMPR2	-0.36437	0.656862	-0.554713	0.608645	0.215636	1 vs 2	0.892701	NS or Estimate < 0.5
HCFC1R1	0.302297	0.766791	0.394236	0.713522	0.146593	1 vs 2	0.931075	NS or Estimate < 0.5
PFKL	0.163951	0.710304	0.230818	0.828781	0.08156	1 vs 2	0.959809	NS or Estimate < 0.5
ATP5MC1	-1.16938	0.719458	-1.62537	0.17941	0.746152	1 vs 2	0.640845	NS or Estimate < 0.5
C4B	-0.36437	0.806445	-0.451822	0.674813	0.170817	1 vs 2	0.915741	NS or Estimate < 0.5
ECHDC1	0.32576	0.521629	0.624505	0.56615	0.247068	1 vs 2	0.879707	NS or Estimate < 0.5
ATP5MC2	-1.89056	0.586074	-3.22581	0.0321029	1.49346	1 vs 2	0.360206	P < 0.05
DEFB108B	0.773976	0.417031	1.85592	0.137046	0.863132	1 vs 2	0.605507	NS or Estimate < 0.5
ASTL	-0.0310365	0.213309	-0.1455	0.891354	0.04995	1 vs 2	0.980027	NS or Estimate < 0.5
AFTPH	0.63563	0.699961	0.908094	0.415192	0.381751	1 vs 2	0.813123	NS or Estimate < 0.5
SUMO4	0.830618	0.314376	2.64211	0.0574533	1.24068	1 vs 2	0.445136	NS or Estimate < 0.5
LCLAT1	-0.559357	0.551089	-1.015	0.367508	0.434733	1 vs 2	0.792142	NS or Estimate < 0.5
ATP5MC3	0.793607	0.894142	0.887563	0.424922	0.37169	1 vs 2	0.81584	NS or Estimate < 0.5
EPSTI1	0.302297	0.704932	0.428831	0.690132	0.161068	1 vs 2	0.923324	NS or Estimate < 0.5
EXOSC3	-0.243513	0.44892	-0.542442	0.616322	0.210192	1 vs 2	0.89684	NS or Estimate < 0.5
GATA3	-1.03849	0.658029	-1.57819	0.189663	0.722018	1 vs 2	0.645212	NS or Estimate < 0.5
SFR1	-0.169382	0.481857	-0.35152	0.742934	0.12905	1 vs 2	0.944972	NS or Estimate < 0.5
ZNF787	-0.754345	0.632796	-1.19208	0.299117	0.52416	1 vs 2	0.744215	NS or Estimate < 0.5
ANXA2	0.207163	0.946352	0.218907	0.837439	0.077047	1 vs 2	0.963234	NS or Estimate < 0.5
THOC5	1.34539	0.50185	2.68086	0.0551791	1.25823	1 vs 2	0.436833	NS or Estimate < 0.5
CBY1	-1.22602	0.528425	-2.32015	0.0811236	1.09085	1 vs 2	0.496508	NS or Estimate < 0.5
OR8G1	1.16395	0.61732	1.88549	0.132439	0.877986	1 vs 2	0.600263	NS or Estimate < 0.5
PTRH1	-0.0310365	0.526242	-0.0589775	0.955799	0.0196335	1 vs 2	0.981787	NS or Estimate < 0.5
KCTD11	-1.22602	0.683718	-1.79317	0.147405	0.831488	1 vs 2	0.609195	NS or Estimate < 0.5
ALKAL2	0.107309	0.695568	0.154276	0.884863	0.0531238	1 vs 2	0.980027	NS or Estimate < 0.5
TWISTNB	-0.0310365	0.213309	-0.1455	0.891354	0.04995	1 vs 2	0.980027	NS or Estimate < 0.5
RPLP1	0.22371	0.605528	0.369447	0.730522	0.136367	1 vs 2	0.943231	NS or Estimate < 0.5
BICD1	-0.25706	0.955053	-0.269158	0.801121	0.0963017	1 vs 2	0.959122	NS or Estimate < 0.5
SMAD2	1.55393	0.293661	5.29156	0.00612204	2.2131	1 vs 2	0.213222	P < 0.05
LDLRAD4	0.497284	0.656507	0.75747	0.49094	0.308972	1 vs 2	0.838226	NS or Estimate < 0.5
HMGXB4	-0.0310365	0.213309	-0.1455	0.891354	0.04995	1 vs 2	0.980027	NS or Estimate < 0.5
UQCR10	-0.105167	1.09119	-0.0963789	0.927855	0.0325197	1 vs 2	0.981787	NS or Estimate < 0.5
BRPF1	-1.47168	0.290061	-5.07369	0.00711204	2.14801	1 vs 2	0.224932	P < 0.05
ARHGEF35	0.497284	0.933051	0.532966	0.622291	0.206006	1 vs 2	0.901015	NS or Estimate < 0.5
ATP5PF	0.830618	0.84842	0.979017	0.383004	0.416797	1 vs 2	0.79512	NS or Estimate < 0.5
MTFP1	0.968964	0.471466	2.05521	0.109043	0.962402	1 vs 2	0.55632	NS or Estimate < 0.5
GLE1	-0.892691	0.354367	-2.51912	0.0654183	1.1843	1 vs 2	0.459008	NS or Estimate < 0.5
ERLIN2	-0.36437	0.888655	-0.410024	0.702798	0.15317	1 vs 2	0.928565	NS or Estimate < 0.5
RBMS3	0.302297	0.593525	0.509324	0.637337	0.195631	1 vs 2	0.905172	NS or Estimate < 0.5
GTF2IRD2B	-0.717334	1.04393	-0.687151	0.529755	0.275925	1 vs 2	0.857806	NS or Estimate < 0.5
SMARCD3	-0.0310365	0.373795	-0.0830308	0.937816	0.0278823	1 vs 2	0.981787	NS or Estimate < 0.5
DMAC2L	0.163951	0.801797	0.20448	0.847962	0.0716237	1 vs 2	0.969066	NS or Estimate < 0.5
SP5	-0.36437	0.382448	-0.952731	0.394677	0.403758	1 vs 2	0.798252	NS or Estimate < 0.5
MED15	-0.118715	0.412203	-0.288	0.787653	0.103665	1 vs 2	0.957353	NS or Estimate < 0.5
MANBAL	-0.559357	0.569757	-0.981746	0.381809	0.418153	1 vs 2	0.79512	NS or Estimate < 0.5
TXNDC8	0.27126	0.993194	0.273119	0.798283	0.0978433	1 vs 2	0.959122	NS or Estimate < 0.5
BMF	-0.0310365	0.58284	-0.0532504	0.960086	0.01769	1 vs 2	0.981787	NS or Estimate < 0.5
RPLP2	-0.150215	0.303194	-0.495441	0.646272	0.189584	1 vs 2	0.910705	NS or Estimate < 0.5
NOMO3	0.881285	0.91418	0.964017	0.389629	0.409349	1 vs 2	0.798252	NS or Estimate < 0.5
GRK6	-0.226024	0.499256	-0.452722	0.674217	0.1712	1 vs 2	0.915741	NS or Estimate < 0.5
OR10AD1	-0.169382	0.667892	-0.253607	0.812301	0.0902831	1 vs 2	0.959122	NS or Estimate < 0.5
OR52M1	-2.22602	0.278333	-7.99771	0.00132534	2.87767	1 vs 2	0.115312	P < 0.05
ZNF740	-0.276692	1.00312	-0.275831	0.796342	0.0989005	1 vs 2	0.959062	NS or Estimate < 0.5
RTP2	1.35894	0.600328	2.26366	0.0863302	1.06384	1 vs 2	0.510969	NS or Estimate < 0.5
TMEM220	-0.754345	0.730765	-1.03227	0.36027	0.443372	1 vs 2	0.786797	NS or Estimate < 0.5
VHLL	-0.610025	1.03133	-0.591493	0.586	0.232102	1 vs 2	0.883155	NS or Estimate < 0.5
ZNF705A	-0.0310365	0.64442	-0.0481619	0.963896	0.0159698	1 vs 2	0.981787	NS or Estimate < 0.5
RNASEK	1.83062	0.743902	2.46083	0.069629	1.15721	1 vs 2	0.466005	NS or Estimate < 0.5
ETV3L	-0.0310365	0.373795	-0.0830308	0.937816	0.0278823	1 vs 2	0.981787	NS or Estimate < 0.5
TRIM67	0.358939	0.743902	0.482508	0.654662	0.183983	1 vs 2	0.912997	NS or Estimate < 0.5
SPDYE3	0.101996	0.78288	0.130282	0.902632	0.0444892	1 vs 2	0.981787	NS or Estimate < 0.5
METRNL	-0.923727	0.721347	-1.28056	0.269561	0.569344	1 vs 2	0.712596	NS or Estimate < 0.5
LINGO4	-1.66667	0.38165	-4.367	0.0119962	1.92096	1 vs 2	0.263814	P < 0.05
OR1B1	-1.33333	0.728202	-1.83099	0.141065	0.850581	1 vs 2	0.609195	NS or Estimate < 0.5
OR1J1	-0.36437	0.827607	-0.440269	0.682487	0.165905	1 vs 2	0.922342	NS or Estimate < 0.5
OR1J4	-0.697703	0.588405	-1.18575	0.301344	0.520937	1 vs 2	0.744215	NS or Estimate < 0.5
OR1L8	0.497284	0.722382	0.688396	0.529049	0.276504	1 vs 2	0.857806	NS or Estimate < 0.5
OR1N2	-1.03104	0.507324	-2.0323	0.111919	0.951097	1 vs 2	0.563434	NS or Estimate < 0.5
OR10J5	-0.892691	0.672427	-1.32757	0.255019	0.593427	1 vs 2	0.697482	NS or Estimate < 0.5
OR10R2	-0.892691	0.872471	-1.02317	0.364066	0.43882	1 vs 2	0.7901	NS or Estimate < 0.5
OR10T2	-0.36437	0.533491	-0.682992	0.532119	0.273991	1 vs 2	0.857806	NS or Estimate < 0.5
OR13C8	-0.805012	0.683442	-1.17788	0.304137	0.51693	1 vs 2	0.744215	NS or Estimate < 0.5
OR2B11	-0.559357	0.371679	-1.50495	0.206787	0.684476	1 vs 2	0.65587	NS or Estimate < 0.5
OR2M2	-0.610025	0.269381	-2.26455	0.0862459	1.06426	1 vs 2	0.510969	NS or Estimate < 0.5
OR2T12	0.302297	0.395742	0.763873	0.487514	0.312013	1 vs 2	0.836278	NS or Estimate < 0.5
OR4C3	0.440643	0.726291	0.606702	0.576798	0.238976	1 vs 2	0.882449	NS or Estimate < 0.5
OR4C46	-0.282666	0.507324	-0.55717	0.607115	0.216729	1 vs 2	0.892127	NS or Estimate < 0.5
OR4D2	-0.226024	0.946891	-0.238701	0.823068	0.0845643	1 vs 2	0.959809	NS or Estimate < 0.5
OR4D6	-0.36437	0.197375	-1.84608	0.138618	0.85818	1 vs 2	0.605507	NS or Estimate < 0.5
OR4D9	-0.226024	0.499256	-0.452722	0.674217	0.1712	1 vs 2	0.915741	NS or Estimate < 0.5
OR4M2	0.497284	0.791195	0.628523	0.563765	0.248902	1 vs 2	0.878578	NS or Estimate < 0.5
NCK2	0.773976	0.216022	3.58286	0.0231086	1.63623	1 vs 2	0.32193	P < 0.05
OR4N5	0.86911	1.44542	0.601285	0.580065	0.236524	1 vs 2	0.882449	NS or Estimate < 0.5
OR5A1	-0.590394	1.05341	-0.560459	0.605071	0.218194	1 vs 2	0.890621	NS or Estimate < 0.5
OR5L1	-1.07413	0.941319	-1.14109	0.317509	0.498244	1 vs 2	0.752554	NS or Estimate < 0.5
OR5T1	-0.805012	0.683442	-1.17788	0.304137	0.51693	1 vs 2	0.744215	NS or Estimate < 0.5
OR51A2	-0.138346	1.03197	-0.13406	0.89983	0.0458396	1 vs 2	0.981787	NS or Estimate < 0.5
OR51D1	-0.421011	0.645642	-0.652081	0.549921	0.259699	1 vs 2	0.870726	NS or Estimate < 0.5
OR51L1	-0.892691	0.70394	-1.26813	0.273536	0.562986	1 vs 2	0.715723	NS or Estimate < 0.5
OR51S1	-0.697703	0.996103	-0.700432	0.522257	0.282115	1 vs 2	0.855299	NS or Estimate < 0.5
RPS3	1.16194	0.640139	1.81514	0.143686	0.842584	1 vs 2	0.609195	NS or Estimate < 0.5
SFMBT1	0.830618	0.640555	1.29672	0.264474	0.577617	1 vs 2	0.708467	NS or Estimate < 0.5
OR52E2	-1.47168	0.45753	-3.21657	0.0323858	1.48964	1 vs 2	0.36035	P < 0.05
OR52E4	-0.36437	0.615852	-0.591651	0.585904	0.232174	1 vs 2	0.883155	NS or Estimate < 0.5
OR52E8	-0.226024	0.558803	-0.404479	0.706555	0.150854	1 vs 2	0.930178	NS or Estimate < 0.5
OR52I2	1.16395	0.645642	1.80278	0.145766	0.836343	1 vs 2	0.609195	NS or Estimate < 0.5
OR52L1	-1.08768	0.346059	-3.14305	0.0347457	1.4591	1 vs 2	0.370006	P < 0.05
OR56A4	-1.33333	0.666667	-2	0.116117	0.935106	1 vs 2	0.574247	NS or Estimate < 0.5
OR7A10	-0.590394	0.733613	-0.804775	0.466061	0.331557	1 vs 2	0.835622	NS or Estimate < 0.5
OR8K3	-0.805012	0.609388	-1.32102	0.256998	0.590071	1 vs 2	0.699912	NS or Estimate < 0.5
OR8J1	0.830618	0.41972	1.97898	0.11894	0.92467	1 vs 2	0.574247	NS or Estimate < 0.5
TMEM198	-0.421011	0.289	-1.45679	0.218899	0.659756	1 vs 2	0.668383	NS or Estimate < 0.5
OR9Q1	-0.754345	0.671639	-1.12314	0.324229	0.489148	1 vs 2	0.758117	NS or Estimate < 0.5
FRG2	0.74294	0.884384	0.840065	0.448152	0.348575	1 vs 2	0.82588	NS or Estimate < 0.5
OR9K2	-0.559357	0.558803	-1.00099	0.373475	0.427738	1 vs 2	0.792142	NS or Estimate < 0.5
OR4C12	-1.55936	0.294714	-5.29108	0.00612402	2.21296	1 vs 2	0.213222	P < 0.05
CHD3	1.43307	0.564974	2.53652	0.0642177	1.19235	1 vs 2	0.459008	NS or Estimate < 0.5
OR6B1	0.163951	0.652219	0.251374	0.813911	0.0894233	1 vs 2	0.959122	NS or Estimate < 0.5
OR9Q2	-1.13835	0.719034	-1.58316	0.188554	0.724564	1 vs 2	0.645212	NS or Estimate < 0.5
OR9G4	-0.138346	0.439776	-0.314583	0.768804	0.114184	1 vs 2	0.954961	NS or Estimate < 0.5
SREBF1	1.49728	0.540619	2.76957	0.050353	1.29797	1 vs 2	0.421455	NS or Estimate < 0.5
HNRNPL	1.3023	0.617655	2.10845	0.102669	0.988559	1 vs 2	0.544675	NS or Estimate < 0.5
RGS10	-1.66667	0.616302	-2.7043	0.053854	1.26878	1 vs 2	0.433792	NS or Estimate < 0.5
AK4	-0.0952515	0.53214	-0.178997	0.866641	0.0621609	1 vs 2	0.9771	NS or Estimate < 0.5
KDM2B	0.27126	0.332886	0.814874	0.460879	0.336413	1 vs 2	0.833039	NS or Estimate < 0.5
ZNF32	-1.55936	0.434526	-3.58864	0.0229897	1.63847	1 vs 2	0.32193	P < 0.05
ACTR2	0.63563	0.859088	0.73989	0.500439	0.300649	1 vs 2	0.841909	NS or Estimate < 0.5
NFASC	-1.08768	0.513279	-2.11908	0.101447	0.993759	1 vs 2	0.542921	NS or Estimate < 0.5
SF3A1	-0.471679	0.662796	-0.711651	0.515984	0.287363	1 vs 2	0.852396	NS or Estimate < 0.5
MARCHF2	0.497284	0.317528	1.56611	0.192382	0.715835	1 vs 2	0.645212	NS or Estimate < 0.5
B4GALT2	-0.956906	0.912838	-1.04828	0.353672	0.4514	1 vs 2	0.783453	NS or Estimate < 0.5
OR10G3	-3.13331	0.5465	-5.73341	0.00458333	2.33882	1 vs 2	0.193707	P < 0.05
OR5B3	-0.892691	0.354695	-2.51679	0.0655809	1.18322	1 vs 2	0.459008	NS or Estimate < 0.5
OR4B1	-0.559357	0.90786	-0.616127	0.571144	0.243254	1 vs 2	0.880995	NS or Estimate < 0.5
NFKBIZ	1.16395	0.919424	1.26596	0.274239	0.561871	1 vs 2	0.716832	NS or Estimate < 0.5
OR2A2	-0.0310365	0.615495	-0.0504252	0.962201	0.0167341	1 vs 2	0.981787	NS or Estimate < 0.5
OR4K15	-0.0310365	0.71096	-0.0436543	0.967272	0.0144513	1 vs 2	0.981787	NS or Estimate < 0.5
OR5D16	-0.502716	0.874795	-0.574667	0.596291	0.224542	1 vs 2	0.886183	NS or Estimate < 0.5
OR6C75	-1.03104	0.790246	-1.3047	0.261994	0.581709	1 vs 2	0.705845	NS or Estimate < 0.5
OR6C70	0.63563	0.948078	0.67044	0.539298	0.268171	1 vs 2	0.860297	NS or Estimate < 0.5
CPM	1.7664	0.817812	2.15991	0.0968985	1.01368	1 vs 2	0.531162	NS or Estimate < 0.5
OR4F21	-0.36437	0.823498	-0.442466	0.681025	0.166837	1 vs 2	0.922342	NS or Estimate < 0.5
OR4A47	-1.08768	0.348924	-3.11724	0.0356216	1.44829	1 vs 2	0.370006	P < 0.05
OR6C65	-0.0310365	0.925774	-0.0335249	0.974862	0.0110568	1 vs 2	0.981787	NS or Estimate < 0.5
SF3B1	0.335475	0.481021	0.697423	0.523949	0.280711	1 vs 2	0.85577	NS or Estimate < 0.5
OR5B2	-0.559357	0.605369	-0.923994	0.407784	0.38957	1 vs 2	0.808836	NS or Estimate < 0.5
ITGB4	1.13646	0.489799	2.32027	0.081113	1.09091	1 vs 2	0.496508	NS or Estimate < 0.5
CHEK2	0.723308	0.654411	1.10528	0.331044	0.480115	1 vs 2	0.76349	NS or Estimate < 0.5
VPS54	0.497284	0.793186	0.626945	0.564701	0.248181	1 vs 2	0.879375	NS or Estimate < 0.5
GBA	1.35894	0.289	4.70222	0.00929313	2.03184	1 vs 2	0.237199	P < 0.05
NUMB	0.497284	0.46617	1.06675	0.346193	0.460682	1 vs 2	0.780377	NS or Estimate < 0.5
ADAM9	0.497284	0.771332	0.644709	0.554228	0.256311	1 vs 2	0.871658	NS or Estimate < 0.5
ZNF780B	-0.226024	0.666516	-0.339113	0.75158	0.124025	1 vs 2	0.947394	NS or Estimate < 0.5
ATP8B2	-0.0310365	0.387386	-0.0801176	0.939992	0.0268759	1 vs 2	0.981787	NS or Estimate < 0.5
ERBB2	-0.559357	0.253327	-2.20804	0.091826	1.03703	1 vs 2	0.522706	NS or Estimate < 0.5
IP6K2	-0.471679	0.818459	-0.576302	0.595286	0.225274	1 vs 2	0.886183	NS or Estimate < 0.5
ERBB3	0.678725	0.892165	0.760761	0.489177	0.310534	1 vs 2	0.837242	NS or Estimate < 0.5
KRTAP5-1	-0.18293	1.0591	-0.172722	0.871257	0.0598536	1 vs 2	0.978566	NS or Estimate < 0.5
RPS3A	1.61785	0.675639	2.39455	0.074797	1.12612	1 vs 2	0.47788	NS or Estimate < 0.5
YBEY	-0.697703	0.504614	-1.38265	0.238952	0.621689	1 vs 2	0.688323	NS or Estimate < 0.5
LRRC37A2	0.245655	0.346059	0.709866	0.516979	0.286527	1 vs 2	0.8525	NS or Estimate < 0.5
TCEAL9	0.861654	0.462739	1.86208	0.136073	0.866227	1 vs 2	0.604741	NS or Estimate < 0.5
ARHGAP17	-0.502716	0.503075	-0.999287	0.374207	0.426888	1 vs 2	0.792142	NS or Estimate < 0.5
TCEAL1	-0.36437	0.980624	-0.371569	0.729059	0.137238	1 vs 2	0.941697	NS or Estimate < 0.5
SLC25A25	-0.610025	0.702318	-0.868589	0.434081	0.362429	1 vs 2	0.81584	NS or Estimate < 0.5
SPIN2B	-1.89269	0.519243	-3.6451	0.0218659	1.66023	1 vs 2	0.32193	P < 0.05
TCEAL4	1.51692	0.84071	1.80433	0.145504	0.837125	1 vs 2	0.609195	NS or Estimate < 0.5
TCEAL6	-1.16938	0.743902	-1.57196	0.191061	0.718829	1 vs 2	0.645212	NS or Estimate < 0.5
LRRC18	-0.0310365	0.835429	-0.0371503	0.972145	0.0122688	1 vs 2	0.981787	NS or Estimate < 0.5
ALG3	1.27126	0.717464	1.77188	0.151108	0.820713	1 vs 2	0.615336	NS or Estimate < 0.5
LRIF1	0.584963	0.811504	0.720838	0.510888	0.291674	1 vs 2	0.851541	NS or Estimate < 0.5
RPS4X	1.57326	0.580392	2.71068	0.0534994	1.27165	1 vs 2	0.433115	NS or Estimate < 0.5
ATN1	-0.697703	0.793186	-0.879621	0.428737	0.367809	1 vs 2	0.81584	NS or Estimate < 0.5
SDCBP	1.71722	0.342707	5.01075	0.00743374	2.12879	1 vs 2	0.224932	P < 0.05
KLHL5	-1	0.579899	-1.72444	0.159718	0.796645	1 vs 2	0.631671	NS or Estimate < 0.5
C8orf48	-1.55936	0.424317	-3.67498	0.0212977	1.67167	1 vs 2	0.32193	P < 0.05
NTRK2	-0.892691	0.448497	-1.9904	0.117396	0.930346	1 vs 2	0.574247	NS or Estimate < 0.5
SCP2	-0.300155	0.85474	-0.351165	0.74318	0.128906	1 vs 2	0.944972	NS or Estimate < 0.5
ZNF483	-0.25706	0.773579	-0.3323	0.756347	0.121279	1 vs 2	0.947394	NS or Estimate < 0.5
IGIP	-0.169382	0.743902	-0.227695	0.831049	0.0803734	1 vs 2	0.96081	NS or Estimate < 0.5
IGF2BP2	0.968964	0.286257	3.38494	0.027659	1.55816	1 vs 2	0.349394	P < 0.05
SPOP	-0.610025	0.702318	-0.868589	0.434081	0.362429	1 vs 2	0.81584	NS or Estimate < 0.5
BRWD1	-0.300155	0.844432	-0.355452	0.740203	0.130649	1 vs 2	0.944972	NS or Estimate < 0.5
ERV3-1	-0.559357	0.577176	-0.969127	0.387361	0.411884	1 vs 2	0.797151	NS or Estimate < 0.5
SETD4	-0.226024	0.357201	-0.632764	0.561256	0.250839	1 vs 2	0.877753	NS or Estimate < 0.5
GEMIN7	0.358939	0.611568	0.586915	0.588788	0.230041	1 vs 2	0.883526	NS or Estimate < 0.5
EI24	0.547952	0.989776	0.553612	0.609332	0.215146	1 vs 2	0.892701	NS or Estimate < 0.5
RASL10A	1.04309	0.633224	1.64728	0.174847	0.757343	1 vs 2	0.639907	NS or Estimate < 0.5
RWDD1	-0.169382	0.756486	-0.223907	0.833801	0.0789376	1 vs 2	0.962251	NS or Estimate < 0.5
TULP4	0.968964	0.615495	1.57428	0.190537	0.72002	1 vs 2	0.645212	NS or Estimate < 0.5
HCST	-0.666667	1.34617	-0.495233	0.646407	0.189494	1 vs 2	0.910743	NS or Estimate < 0.5
TRPM3	-2.19499	0.419959	-5.22667	0.00639825	2.19394	1 vs 2	0.218972	P < 0.05
LMBRD2	-1.08768	0.714914	-1.52141	0.202805	0.692921	1 vs 2	0.65587	NS or Estimate < 0.5
SS18	0.302297	0.881818	0.342811	0.748998	0.125519	1 vs 2	0.947394	NS or Estimate < 0.5
IRGQ	-0.892691	0.434258	-2.05567	0.108987	0.962626	1 vs 2	0.55632	NS or Estimate < 0.5
TFG	1.87645	0.567663	3.30557	0.0297776	1.52611	1 vs 2	0.354395	P < 0.05
OPTN	-0.0310365	1.09183	-0.0284261	0.978684	0.0093575	1 vs 2	0.982493	NS or Estimate < 0.5
COA5	-0.892691	0.85987	-1.03817	0.357825	0.446329	1 vs 2	0.784724	NS or Estimate < 0.5
C18orf25	0.335475	1.02964	0.32582	0.760893	0.118676	1 vs 2	0.950203	NS or Estimate < 0.5
TRIM72	-0.892691	0.656862	-1.35902	0.245717	0.609564	1 vs 2	0.695376	NS or Estimate < 0.5
CISD2	-0.36437	0.773658	-0.47097	0.662198	0.179012	1 vs 2	0.915482	NS or Estimate < 0.5
C4orf46	0.599493	0.296233	2.02372	0.113017	0.946855	1 vs 2	0.566742	NS or Estimate < 0.5
EID3	0.302297	0.395742	0.763873	0.487514	0.312013	1 vs 2	0.836278	NS or Estimate < 0.5
LAMTOR4	0.437094	0.752473	0.580876	0.59248	0.227326	1 vs 2	0.885332	NS or Estimate < 0.5
GPX8	0.497284	0.503075	0.98849	0.378871	0.421509	1 vs 2	0.792142	NS or Estimate < 0.5
ZNF761	1.4809	0.809257	1.82995	0.141236	0.850055	1 vs 2	0.609195	NS or Estimate < 0.5
STEAP3	-0.697703	0.661452	-1.0548	0.351012	0.454679	1 vs 2	0.781373	NS or Estimate < 0.5
SLC41A3	0.107309	0.499256	0.214939	0.840329	0.0755507	1 vs 2	0.963512	NS or Estimate < 0.5
KLF6	0.107309	0.823518	0.130306	0.902615	0.0444976	1 vs 2	0.981787	NS or Estimate < 0.5
SEPTIN2	0.799581	0.464343	1.72196	0.160182	0.795388	1 vs 2	0.632315	NS or Estimate < 0.5
TMEM64	-0.805012	0.710137	-1.1336	0.320297	0.494447	1 vs 2	0.755097	NS or Estimate < 0.5
LGMN	0.440643	0.754997	0.583635	0.590791	0.228566	1 vs 2	0.885239	NS or Estimate < 0.5
SLC7A2	-0.438501	0.920084	-0.476587	0.658523	0.181429	1 vs 2	0.914417	NS or Estimate < 0.5
MXI1	-0.610025	1.02952	-0.592531	0.585369	0.232571	1 vs 2	0.883155	NS or Estimate < 0.5
KYAT3	0.389975	0.568678	0.685757	0.530546	0.275277	1 vs 2	0.857806	NS or Estimate < 0.5
TFIP11	-1.03104	0.533903	-1.93113	0.125652	0.900831	1 vs 2	0.58952	NS or Estimate < 0.5
ADGRL1	0.497284	0.856328	0.580717	0.592577	0.227255	1 vs 2	0.885332	NS or Estimate < 0.5
RBPMS	0.830618	0.41972	1.97898	0.11894	0.92467	1 vs 2	0.574247	NS or Estimate < 0.5
CFAP58	-1.22602	0.342112	-3.58369	0.0230914	1.63655	1 vs 2	0.32193	P < 0.05
WDR89	1.69227	0.254244	6.65608	0.00264604	2.5774	1 vs 2	0.152667	P < 0.05
ZNF121	0.497284	0.241032	2.06315	0.108066	0.966309	1 vs 2	0.55632	NS or Estimate < 0.5
FNIP1	-0.0310365	0.926095	-0.0335133	0.974871	0.0110529	1 vs 2	0.981787	NS or Estimate < 0.5
SULT1C3	-1.03104	0.69724	-1.47874	0.213292	0.671026	1 vs 2	0.661785	NS or Estimate < 0.5
TDP1	1.16395	0.645642	1.80278	0.145766	0.836343	1 vs 2	0.609195	NS or Estimate < 0.5
RAB19	-1.21248	0.291204	-4.16367	0.0141032	1.85068	1 vs 2	0.26978	P < 0.05
CCT3	0.733224	0.666554	1.10002	0.333075	0.477458	1 vs 2	0.766969	NS or Estimate < 0.5
DSP	1.51571	0.499959	3.03167	0.038717	1.4121	1 vs 2	0.385294	P < 0.05
NIPA2	-0.633488	1.00163	-0.632457	0.561437	0.250699	1 vs 2	0.877753	NS or Estimate < 0.5
TCP1	1.04309	0.87009	1.19883	0.296757	0.527599	1 vs 2	0.744215	NS or Estimate < 0.5
PPP2CB	-0.471679	0.811524	-0.581226	0.592265	0.227484	1 vs 2	0.885332	NS or Estimate < 0.5
SH3D19	0.409606	0.728482	0.562273	0.603945	0.219002	1 vs 2	0.890621	NS or Estimate < 0.5
CDKL4	-0.0310365	0.526242	-0.0589775	0.955799	0.0196335	1 vs 2	0.981787	NS or Estimate < 0.5
CLSTN1	0.538237	0.43031	1.25081	0.279173	0.554127	1 vs 2	0.724932	NS or Estimate < 0.5
CADPS2	-0.471679	0.694597	-0.679069	0.534355	0.27217	1 vs 2	0.857806	NS or Estimate < 0.5
ARMCX6	0.107309	0.629394	0.170496	0.872896	0.0590373	1 vs 2	0.978566	NS or Estimate < 0.5
SLX4IP	0.497284	0.503075	0.98849	0.378871	0.421509	1 vs 2	0.792142	NS or Estimate < 0.5
C20orf202	-0.559357	0.486505	-1.14975	0.314315	0.502635	1 vs 2	0.74785	NS or Estimate < 0.5
SPANXN5	0.497284	0.503075	0.98849	0.378871	0.421509	1 vs 2	0.792142	NS or Estimate < 0.5
BRD9	-0.559357	0.675248	-0.828373	0.454023	0.342922	1 vs 2	0.82588	NS or Estimate < 0.5
KIAA0930	-0.697703	0.772822	-0.902799	0.417683	0.379153	1 vs 2	0.813968	NS or Estimate < 0.5
TMEM230	-0.452048	0.899291	-0.502672	0.641609	0.192729	1 vs 2	0.907177	NS or Estimate < 0.5
DNASE1L1	-0.754345	0.672408	-1.12186	0.324715	0.488498	1 vs 2	0.758117	NS or Estimate < 0.5
ANKRD16	-0.502716	0.669381	-0.751015	0.494412	0.305911	1 vs 2	0.83969	NS or Estimate < 0.5
PKD1	0.251629	0.302829	0.830927	0.452735	0.344156	1 vs 2	0.82588	NS or Estimate < 0.5
SSBP3	0.935785	0.748743	1.24981	0.279503	0.553614	1 vs 2	0.725239	NS or Estimate < 0.5
SYTL3	0.63563	0.948078	0.67044	0.539298	0.268171	1 vs 2	0.860297	NS or Estimate < 0.5
FAM168B	0.440643	0.471988	0.933589	0.403367	0.394299	1 vs 2	0.806735	NS or Estimate < 0.5
C10orf62	-0.300155	0.837858	-0.358241	0.738269	0.131785	1 vs 2	0.944972	NS or Estimate < 0.5
SSBP4	-0.226024	0.61644	-0.36666	0.732445	0.135225	1 vs 2	0.943645	NS or Estimate < 0.5
RPS6	0.91158	0.614432	1.48362	0.212067	0.673528	1 vs 2	0.661785	NS or Estimate < 0.5
LRRC38	1.16395	0.289	4.02752	0.0157659	1.80228	1 vs 2	0.278685	P < 0.05
ZNF766	0.107309	0.763275	0.140591	0.894989	0.0481823	1 vs 2	0.981357	NS or Estimate < 0.5
TTC7B	0.302297	0.695271	0.43479	0.686144	0.163585	1 vs 2	0.922342	NS or Estimate < 0.5
PIK3R6	-1.22602	0.406383	-3.01692	0.0392821	1.40581	1 vs 2	0.386057	P < 0.05
SAMD15	-0.559357	0.434258	-1.28808	0.267183	0.573192	1 vs 2	0.711823	NS or Estimate < 0.5
SPIN3	0.27126	0.332886	0.814874	0.460879	0.336413	1 vs 2	0.833039	NS or Estimate < 0.5
IBA57	0.194988	0.839456	0.232278	0.827722	0.0821155	1 vs 2	0.959809	NS or Estimate < 0.5
TDRD6	0.830618	0.41972	1.97898	0.11894	0.92467	1 vs 2	0.574247	NS or Estimate < 0.5
TMEM244	0.63563	0.75201	0.845241	0.445571	0.351083	1 vs 2	0.82588	NS or Estimate < 0.5
ACER2	-1	0.728883	-1.37196	0.241989	0.616204	1 vs 2	0.689957	NS or Estimate < 0.5
PRAMEF6	0.248889	0.6048	0.411523	0.701784	0.153796	1 vs 2	0.927345	NS or Estimate < 0.5
MTX3	0.547952	0.517701	1.05843	0.349541	0.456502	1 vs 2	0.780557	NS or Estimate < 0.5
ERCC6L2	0.63563	0.692531	0.917836	0.41064	0.386539	1 vs 2	0.808836	NS or Estimate < 0.5
SLC6A17	-0.0876781	0.674597	-0.129971	0.902863	0.0443781	1 vs 2	0.981787	NS or Estimate < 0.5
C6orf58	1.16395	0.607246	1.91677	0.127746	0.893654	1 vs 2	0.590701	NS or Estimate < 0.5
MUC21	-0.36437	0.873463	-0.417155	0.697981	0.156156	1 vs 2	0.923993	NS or Estimate < 0.5
GOLGA7B	-1.66667	0.474522	-3.5123	0.0246206	1.6087	1 vs 2	0.327747	P < 0.05
THEMIS	-0.892691	0.739473	-1.2072	0.293858	0.531862	1 vs 2	0.740231	NS or Estimate < 0.5
RAP1A	-0.559357	0.710942	-0.786784	0.475406	0.322936	1 vs 2	0.836278	NS or Estimate < 0.5
LIPJ	0.409606	0.771252	0.531093	0.623476	0.205181	1 vs 2	0.90157	NS or Estimate < 0.5
RAP1B	1.22817	0.253382	4.8471	0.00835696	2.07795	1 vs 2	0.236624	P < 0.05
LDLRAD1	-0.892691	0.53644	-1.6641	0.171425	0.765927	1 vs 2	0.639738	NS or Estimate < 0.5
C1orf189	-0.559357	0.675248	-0.828373	0.454023	0.342922	1 vs 2	0.82588	NS or Estimate < 0.5
MYBPHL	-1.19499	0.68087	-1.75509	0.154098	0.812204	1 vs 2	0.619406	NS or Estimate < 0.5
HERPUD1	0.0762729	0.823977	0.0925667	0.930699	0.0311909	1 vs 2	0.981787	NS or Estimate < 0.5
FYTTD1	1.04309	0.579694	1.79939	0.146343	0.834629	1 vs 2	0.609195	NS or Estimate < 0.5
MAGEA10	0.163951	0.682431	0.240246	0.82195	0.0851546	1 vs 2	0.959809	NS or Estimate < 0.5
MAGEA4	-3.627	0.611109	-5.93512	0.00404024	2.39359	1 vs 2	0.177322	P < 0.05
C1GALT1C1	-0.892691	0.354367	-2.51912	0.0654183	1.1843	1 vs 2	0.459008	NS or Estimate < 0.5
SLC13A3	1.16395	0.645642	1.80278	0.145766	0.836343	1 vs 2	0.609195	NS or Estimate < 0.5
ZMAT1	-0.36437	0.60477	-0.602493	0.579335	0.23707	1 vs 2	0.882449	NS or Estimate < 0.5
MCCD1	-0.0310365	1.10434	-0.0281042	0.978925	0.00925044	1 vs 2	0.982493	NS or Estimate < 0.5
OLA1	1.28875	0.22213	5.80178	0.00438974	2.35756	1 vs 2	0.187998	P < 0.05
PNLIPRP3	-1.55936	0.424317	-3.67498	0.0212977	1.67167	1 vs 2	0.32193	P < 0.05
BTBD1	-0.36437	1.20564	-0.302222	0.777546	0.109274	1 vs 2	0.956648	NS or Estimate < 0.5
RPS8	2.68554	0.813088	3.30289	0.0298524	1.52502	1 vs 2	0.354395	P < 0.05
MSL1	-0.25706	1.04172	-0.246765	0.817237	0.087652	1 vs 2	0.959809	NS or Estimate < 0.5
PRAMEF8	0.0256052	0.569757	0.0449405	0.966309	0.0148841	1 vs 2	0.981787	NS or Estimate < 0.5
ROPN1B	-0.966821	0.768697	-1.25774	0.276905	0.557669	1 vs 2	0.7205	NS or Estimate < 0.5
NTRK3	-0.0310365	0.987589	-0.0314265	0.976435	0.0103567	1 vs 2	0.981787	NS or Estimate < 0.5
DNAJC21	0.0898202	0.646338	0.138968	0.896191	0.0475993	1 vs 2	0.981357	NS or Estimate < 0.5
TRIM61	-1.16181	0.642657	-1.80782	0.144914	0.838889	1 vs 2	0.609195	NS or Estimate < 0.5
MYLK4	-0.805012	0.637102	-1.26355	0.275016	0.560642	1 vs 2	0.718031	NS or Estimate < 0.5
FOXP4	-1.03104	0.490396	-2.10246	0.103366	0.985621	1 vs 2	0.544675	NS or Estimate < 0.5
SEC61G	0.881285	0.730362	1.20664	0.29405	0.531578	1 vs 2	0.740534	NS or Estimate < 0.5
KRTAP5-7	0.163951	0.652219	0.251374	0.813911	0.0894233	1 vs 2	0.959122	NS or Estimate < 0.5
SLC45A2	0.251629	0.806521	0.311993	0.770632	0.113153	1 vs 2	0.955498	NS or Estimate < 0.5
GRP	-1.33333	0.682667	-1.95313	0.122517	0.911804	1 vs 2	0.581606	NS or Estimate < 0.5
ITM2C	0.358939	0.667892	0.53742	0.619481	0.207972	1 vs 2	0.898471	NS or Estimate < 0.5
DCTD	-0.697703	0.494257	-1.41162	0.230907	0.636564	1 vs 2	0.679905	NS or Estimate < 0.5
ABI1	-0.331191	0.303319	-1.09189	0.336238	0.473353	1 vs 2	0.771266	NS or Estimate < 0.5
NHLRC3	0.547952	0.791101	0.692645	0.526644	0.278483	1 vs 2	0.857003	NS or Estimate < 0.5
ZNF260	0.692272	0.540976	1.27967	0.269843	0.568889	1 vs 2	0.712596	NS or Estimate < 0.5
NUDT17	-0.697703	0.523705	-1.33225	0.253614	0.595827	1 vs 2	0.697482	NS or Estimate < 0.5
RGMB	0.830618	0.640555	1.29672	0.264474	0.577617	1 vs 2	0.708467	NS or Estimate < 0.5
DDX60L	-1.22602	0.810221	-1.5132	0.204782	0.688708	1 vs 2	0.65587	NS or Estimate < 0.5
SPIN4	1.16395	0.652219	1.7846	0.148884	0.827153	1 vs 2	0.61015	NS or Estimate < 0.5
LRRC73	-0.666667	0.818301	-0.814697	0.46097	0.336328	1 vs 2	0.833039	NS or Estimate < 0.5
TCEAL5	0.107309	0.842704	0.127339	0.904817	0.0434394	1 vs 2	0.981787	NS or Estimate < 0.5
KNOP1	-0.226024	0.499256	-0.452722	0.674217	0.1712	1 vs 2	0.915741	NS or Estimate < 0.5
C9orf152	-1.47168	0.823075	-1.78803	0.148291	0.828885	1 vs 2	0.609686	NS or Estimate < 0.5
RPS9	0.552266	0.499323	1.10603	0.330756	0.480492	1 vs 2	0.76344	NS or Estimate < 0.5
CXorf66	-1.42101	0.717568	-1.98032	0.118759	0.925335	1 vs 2	0.574247	NS or Estimate < 0.5
MPST	-2.47168	0.560061	-4.41323	0.0115716	1.93661	1 vs 2	0.259464	P < 0.05
SEH1L	-1.13835	0.62321	-1.82659	0.141788	0.848359	1 vs 2	0.609195	NS or Estimate < 0.5
LURAP1	-0.697703	0.772822	-0.902799	0.417683	0.379153	1 vs 2	0.813968	NS or Estimate < 0.5
ZC2HC1B	-0.36437	0.693017	-0.525773	0.626846	0.202839	1 vs 2	0.903157	NS or Estimate < 0.5
CFAP126	-1.08768	0.788476	-1.37947	0.239852	0.620057	1 vs 2	0.688323	NS or Estimate < 0.5
CCDC184	1.34539	0.433866	3.10094	0.0361883	1.44143	1 vs 2	0.372697	P < 0.05
PRR25	-0.415037	0.710713	-0.583973	0.590585	0.228718	1 vs 2	0.885239	NS or Estimate < 0.5
PRR23B	0.547952	0.768312	0.71319	0.515128	0.288085	1 vs 2	0.852396	NS or Estimate < 0.5
ZNF793	0.302297	0.658906	0.458786	0.67021	0.173789	1 vs 2	0.915741	NS or Estimate < 0.5
VSIG8	-0.559357	0.8513	-0.657063	0.547025	0.261993	1 vs 2	0.869516	NS or Estimate < 0.5
PTRHD1	0.466248	0.752049	0.61997	0.56885	0.245002	1 vs 2	0.880995	NS or Estimate < 0.5
C17orf97	0.107309	0.939391	0.114233	0.914557	0.038789	1 vs 2	0.981787	NS or Estimate < 0.5
FIGNL2	1.27126	0.717464	1.77188	0.151108	0.820713	1 vs 2	0.615336	NS or Estimate < 0.5
EIF2AK4	-0.0310365	0.766387	-0.0404971	0.969638	0.0133906	1 vs 2	0.981787	NS or Estimate < 0.5
PLIN5	-1.60245	0.581964	-2.75352	0.0511889	1.29082	1 vs 2	0.422596	NS or Estimate < 0.5
PTCHD4	0.163951	0.492685	0.33277	0.756017	0.121468	1 vs 2	0.947394	NS or Estimate < 0.5
RFPL4B	-0.169382	0.666536	-0.254123	0.811929	0.0904819	1 vs 2	0.959122	NS or Estimate < 0.5
MAD1L1	-0.697703	0.661452	-1.0548	0.351012	0.454679	1 vs 2	0.781373	NS or Estimate < 0.5
STAP2	1.3023	0.395742	3.29077	0.0301936	1.52008	1 vs 2	0.354462	P < 0.05
SLTM	1.01206	0.537592	1.88258	0.132885	0.876523	1 vs 2	0.601203	NS or Estimate < 0.5
EXOC6	0.655261	0.813537	0.805448	0.465715	0.33188	1 vs 2	0.835191	NS or Estimate < 0.5
RPS10	2.25482	1.49524	1.508	0.206043	0.686042	1 vs 2	0.65587	NS or Estimate < 0.5
ANXA2R	-0.892691	0.547653	-1.63003	0.178429	0.748535	1 vs 2	0.639907	NS or Estimate < 0.5
DCUN1D2	-1.22602	0.417031	-2.93989	0.0423939	1.3727	1 vs 2	0.392878	P < 0.05
FLG2	-0.754345	0.447977	-1.68389	0.167489	0.776015	1 vs 2	0.636194	NS or Estimate < 0.5
AKT1	-0.633488	0.625134	-1.01336	0.368202	0.433914	1 vs 2	0.792142	NS or Estimate < 0.5
CUTA	0.756487	0.6462	1.17067	0.306716	0.513264	1 vs 2	0.746262	NS or Estimate < 0.5
ODF3B	-0.0876781	0.918932	-0.0954131	0.928576	0.0321828	1 vs 2	0.981787	NS or Estimate < 0.5
DDX19B	-0.805012	0.570297	-1.41157	0.230921	0.636537	1 vs 2	0.679905	NS or Estimate < 0.5
ETFB	-1	0.644489	-1.55162	0.195701	0.708408	1 vs 2	0.648965	NS or Estimate < 0.5
FBXO44	0.107309	0.763275	0.140591	0.894989	0.0481823	1 vs 2	0.981357	NS or Estimate < 0.5
KCNMA1	-0.0310365	0.507324	-0.0611768	0.954153	0.0203819	1 vs 2	0.981787	NS or Estimate < 0.5
ME3	0.358939	0.730588	0.491301	0.648951	0.187788	1 vs 2	0.911602	NS or Estimate < 0.5
TM9SF1	0.692272	0.509537	1.35863	0.245832	0.609362	1 vs 2	0.695413	NS or Estimate < 0.5
CFH	-0.0310365	0.64442	-0.0481619	0.963896	0.0159698	1 vs 2	0.981787	NS or Estimate < 0.5
LAT	-0.118715	1.02663	-0.115635	0.913515	0.0392845	1 vs 2	0.981787	NS or Estimate < 0.5
CKMT1A	-0.36437	0.806445	-0.451822	0.674813	0.170817	1 vs 2	0.915741	NS or Estimate < 0.5
LLGL2	-0.892691	0.607203	-1.47017	0.215464	0.666625	1 vs 2	0.663574	NS or Estimate < 0.5
ALG1L	1.07627	0.380387	2.82942	0.0473731	1.32447	1 vs 2	0.412424	P < 0.05
MPG	-1.55936	0.434258	-3.59085	0.0229444	1.63932	1 vs 2	0.32193	P < 0.05
RTKN	-1.616	0.387386	-4.17155	0.0140137	1.85345	1 vs 2	0.26978	P < 0.05
DNAJC25	0.63563	0.654969	0.970474	0.386765	0.412553	1 vs 2	0.796327	NS or Estimate < 0.5
RPS12	1.71595	0.721033	2.37984	0.0760023	1.11917	1 vs 2	0.480721	NS or Estimate < 0.5
RPS13	1.8955	0.695816	2.72414	0.0527611	1.27769	1 vs 2	0.42993	NS or Estimate < 0.5
KHDC3L	0.830618	0.380415	2.18345	0.0943795	1.02512	1 vs 2	0.528141	NS or Estimate < 0.5
MSMO1	-0.0310365	0.364937	-0.0850462	0.936311	0.0285797	1 vs 2	0.981787	NS or Estimate < 0.5
SUGP2	-0.350822	0.392298	-0.894276	0.42172	0.374975	1 vs 2	0.81584	NS or Estimate < 0.5
TRIM36	0.604594	0.968766	0.624086	0.566399	0.246877	1 vs 2	0.879707	NS or Estimate < 0.5
MAEA	-0.36437	0.85515	-0.426089	0.691971	0.159912	1 vs 2	0.923407	NS or Estimate < 0.5
S100PBP	0.0566417	0.694597	0.0815461	0.938925	0.0273691	1 vs 2	0.981787	NS or Estimate < 0.5
GOPC	0.376428	0.893676	0.421213	0.695248	0.15786	1 vs 2	0.923993	NS or Estimate < 0.5
ALDH18A1	-0.226024	0.579547	-0.390001	0.716412	0.144837	1 vs 2	0.931075	NS or Estimate < 0.5
BTBD11	-1.08768	0.346059	-3.14305	0.0347457	1.4591	1 vs 2	0.370006	P < 0.05
ARHGAP8	-1.08768	0.422148	-2.57654	0.0615522	1.21076	1 vs 2	0.453837	NS or Estimate < 0.5
RCCD1	0.302297	0.766791	0.394236	0.713522	0.146593	1 vs 2	0.931075	NS or Estimate < 0.5
DAPL1	-1.13835	0.605442	-1.88019	0.133252	0.875326	1 vs 2	0.601276	NS or Estimate < 0.5
VMAC	-1.16181	0.830428	-1.39905	0.234364	0.630109	1 vs 2	0.68671	NS or Estimate < 0.5
ERMAP	0.74294	0.793777	0.935955	0.402284	0.395467	1 vs 2	0.805713	NS or Estimate < 0.5
C14orf28	-0.805012	0.624687	-1.28867	0.266997	0.573494	1 vs 2	0.711823	NS or Estimate < 0.5
OS9	1.35296	0.301664	4.485	0.0109477	1.96068	1 vs 2	0.253228	P < 0.05
HSP90AA1	1.56085	1.17149	1.33236	0.253579	0.595886	1 vs 2	0.697482	NS or Estimate < 0.5
KIAA2026	0.302297	0.766791	0.394236	0.713522	0.146593	1 vs 2	0.931075	NS or Estimate < 0.5
TMEM30B	-0.452048	0.392369	-1.1521	0.313452	0.503829	1 vs 2	0.74785	NS or Estimate < 0.5
ATP6AP1L	0.709761	1.0332	0.686951	0.529869	0.275832	1 vs 2	0.857806	NS or Estimate < 0.5
RAB28	-1.22602	0.406383	-3.01692	0.0392821	1.40581	1 vs 2	0.386057	P < 0.05
RNF215	-1.10517	0.68915	-1.60367	0.184052	0.735059	1 vs 2	0.644905	NS or Estimate < 0.5
SH3PXD2B	-0.118715	1.06645	-0.111317	0.916727	0.03776	1 vs 2	0.981787	NS or Estimate < 0.5
GNG10	0.584963	0.755056	0.774727	0.481748	0.31718	1 vs 2	0.836278	NS or Estimate < 0.5
RPS15	0.828858	0.537133	1.54312	0.197674	0.70405	1 vs 2	0.652141	NS or Estimate < 0.5
SORBS3	0.214619	0.393588	0.545287	0.614537	0.211452	1 vs 2	0.896617	NS or Estimate < 0.5
SH3BP5	0.446617	0.593694	0.752267	0.493737	0.306504	1 vs 2	0.83969	NS or Estimate < 0.5
MUC1	1.40961	0.59475	2.37008	0.0768139	1.11456	1 vs 2	0.483395	NS or Estimate < 0.5
MTCP1	-1.03104	0.364937	-2.82525	0.0475739	1.32263	1 vs 2	0.412424	P < 0.05
EPM2A	-0.36437	0.918678	-0.396624	0.711895	0.147584	1 vs 2	0.931075	NS or Estimate < 0.5
DKK3	-0.226024	0.486505	-0.464587	0.666389	0.176273	1 vs 2	0.915741	NS or Estimate < 0.5
SERBP1	1.31612	0.510942	2.57587	0.0615953	1.21045	1 vs 2	0.453837	NS or Estimate < 0.5
NR3C1	-0.471679	0.694597	-0.679069	0.534355	0.27217	1 vs 2	0.857806	NS or Estimate < 0.5
FPGS	0.709761	0.37073	1.91449	0.128081	0.892515	1 vs 2	0.591188	NS or Estimate < 0.5
SLC26A10	-1.27669	0.517506	-2.46701	0.0691686	1.16009	1 vs 2	0.466005	NS or Estimate < 0.5
VPS13C	0.107309	0.677428	0.158407	0.881812	0.0546241	1 vs 2	0.980027	NS or Estimate < 0.5
ICE2	0.358939	0.554738	0.647041	0.552863	0.257382	1 vs 2	0.870726	NS or Estimate < 0.5
CAVIN4	-0.697703	0.857671	-0.813485	0.461589	0.335745	1 vs 2	0.833047	NS or Estimate < 0.5
RPS16	-0.815822	0.3094	-2.63679	0.057774	1.23827	1 vs 2	0.445136	NS or Estimate < 0.5
PUM1	-0.966821	0.569587	-1.69741	0.164855	0.782898	1 vs 2	0.634465	NS or Estimate < 0.5
MYADM	1.40961	0.392667	3.58983	0.0229653	1.63893	1 vs 2	0.32193	P < 0.05
RPS17	1.06494	0.455232	2.33932	0.079437	1.09998	1 vs 2	0.489981	NS or Estimate < 0.5
RPS19	-0.544506	0.536913	-1.01414	0.367873	0.434303	1 vs 2	0.792142	NS or Estimate < 0.5
ZNF749	-0.36437	0.656862	-0.554713	0.608645	0.215636	1 vs 2	0.892701	NS or Estimate < 0.5
GOLGA8A	0.935785	0.793079	1.17994	0.303404	0.517978	1 vs 2	0.744215	NS or Estimate < 0.5
IQCB1	-0.25706	0.855697	-0.300411	0.77883	0.108557	1 vs 2	0.956648	NS or Estimate < 0.5
RPS21	-0.939442	0.429498	-2.1873	0.0939747	1.02699	1 vs 2	0.527965	NS or Estimate < 0.5
S100A13	-0.25706	1.10579	-0.232467	0.827585	0.0821873	1 vs 2	0.959809	NS or Estimate < 0.5
FBLIM1	1.49728	0.811145	1.84589	0.138649	0.858085	1 vs 2	0.605507	NS or Estimate < 0.5
ARF1	0.988878	0.737743	1.34041	0.25118	0.600014	1 vs 2	0.696443	NS or Estimate < 0.5
TM2D2	-0.559357	0.633144	-0.88346	0.426889	0.369685	1 vs 2	0.81584	NS or Estimate < 0.5
RTL5	-1.08768	0.348924	-3.11724	0.0356216	1.44829	1 vs 2	0.370006	P < 0.05
MSS51	-1.33333	0.908493	-1.46763	0.216111	0.665323	1 vs 2	0.663574	NS or Estimate < 0.5
LRRC24	-0.892691	0.354695	-2.51679	0.0655809	1.18322	1 vs 2	0.459008	NS or Estimate < 0.5
FBXO48	0.302297	0.768577	0.39332	0.714146	0.146213	1 vs 2	0.931075	NS or Estimate < 0.5
ZNF688	-0.452048	0.874177	-0.517112	0.632357	0.199038	1 vs 2	0.905172	NS or Estimate < 0.5
CD276	1.37857	0.230626	5.97752	0.00393629	2.40491	1 vs 2	0.177322	P < 0.05
SLC6A9	-1.08768	0.58397	-1.86256	0.135997	0.866471	1 vs 2	0.604741	NS or Estimate < 0.5
TGFBR2	0.409606	0.84071	0.487215	0.651601	0.186018	1 vs 2	0.912997	NS or Estimate < 0.5
EXOC1	0.163951	0.584745	0.28038	0.793089	0.100678	1 vs 2	0.958148	NS or Estimate < 0.5
MINK1	0.107309	0.509537	0.210602	0.843491	0.0739194	1 vs 2	0.965736	NS or Estimate < 0.5
TRIM17	-1.82848	0.668487	-2.73525	0.0521602	1.28266	1 vs 2	0.425823	NS or Estimate < 0.5
YIPF5	0.799581	0.35851	2.23029	0.0895821	1.04778	1 vs 2	0.517832	NS or Estimate < 0.5
FNBP1L	1.63777	0.754262	2.17136	0.0956646	1.01925	1 vs 2	0.528141	NS or Estimate < 0.5
SC5D	-1.10517	0.68915	-1.60367	0.184052	0.735059	1 vs 2	0.644905	NS or Estimate < 0.5
RPS14	1.60382	0.572352	2.80216	0.048704	1.31244	1 vs 2	0.416131	P < 0.05
AFF3	-0.559357	0.486505	-1.14975	0.314315	0.502635	1 vs 2	0.74785	NS or Estimate < 0.5
CD34	-0.421011	1.01675	-0.414075	0.70006	0.154865	1 vs 2	0.925423	NS or Estimate < 0.5
CHN1	-0.559357	0.70394	-0.79461	0.471323	0.326681	1 vs 2	0.836278	NS or Estimate < 0.5
U2AF1	1.07627	0.546808	1.96828	0.120406	0.919352	1 vs 2	0.577566	NS or Estimate < 0.5
DUT	1.27126	0.979387	1.29802	0.264069	0.578283	1 vs 2	0.708467	NS or Estimate < 0.5
CXorf65	0.107309	0.629394	0.170496	0.872896	0.0590373	1 vs 2	0.978566	NS or Estimate < 0.5
DPPA5	-0.36437	0.373795	-0.974786	0.384863	0.414694	1 vs 2	0.79512	NS or Estimate < 0.5
RAB12	1.28481	0.702704	1.82838	0.141494	0.849262	1 vs 2	0.609195	NS or Estimate < 0.5
AARD	-0.0310365	0.213309	-0.1455	0.891354	0.04995	1 vs 2	0.980027	NS or Estimate < 0.5
VEGFA	-0.307728	0.888684	-0.346274	0.746584	0.126921	1 vs 2	0.946829	NS or Estimate < 0.5
SPAG16	0.918296	0.546134	1.68145	0.167969	0.77477	1 vs 2	0.636783	NS or Estimate < 0.5
RPS24	1.85764	0.621704	2.98799	0.0404183	1.39342	1 vs 2	0.386856	P < 0.05
RPS25	0.178869	0.941066	0.19007	0.85851	0.0662546	1 vs 2	0.971988	NS or Estimate < 0.5
RPS26	0.68739	0.93509	0.735106	0.503048	0.298391	1 vs 2	0.843891	NS or Estimate < 0.5
CCM2	-0.502716	0.642107	-0.782915	0.477434	0.321087	1 vs 2	0.836278	NS or Estimate < 0.5
TCAIM	0.830618	0.509537	1.63014	0.178405	0.748593	1 vs 2	0.639907	NS or Estimate < 0.5
KCTD21	1.79958	0.35851	5.01961	0.00738738	2.13151	1 vs 2	0.224932	P < 0.05
KIAA1755	-0.0310365	0.781922	-0.0396925	0.97024	0.0131207	1 vs 2	0.981787	NS or Estimate < 0.5
RGS7BP	-2.55936	0.440643	-5.80824	0.00437199	2.35932	1 vs 2	0.187998	P < 0.05
SFMBT2	-0.471679	0.892702	-0.528372	0.625198	0.203983	1 vs 2	0.902936	NS or Estimate < 0.5
CPTP	-1.73217	0.36305	-4.77116	0.00883257	2.05391	1 vs 2	0.237199	P < 0.05
ZNF16	-0.300155	0.92272	-0.325294	0.761263	0.118465	1 vs 2	0.950203	NS or Estimate < 0.5
METTL17	0.699845	0.844432	0.828776	0.45382	0.343116	1 vs 2	0.82588	NS or Estimate < 0.5
RPS27	2.06822	0.642179	3.22063	0.0322611	1.49132	1 vs 2	0.360206	P < 0.05
AP2B1	1.35894	0.503075	2.70127	0.0540234	1.26742	1 vs 2	0.433792	NS or Estimate < 0.5
AP1G1	-1.75434	1.4674	-1.19555	0.297903	0.525926	1 vs 2	0.744215	NS or Estimate < 0.5
ARHGAP5	-0.0817042	0.302829	-0.269803	0.800659	0.0965523	1 vs 2	0.959122	NS or Estimate < 0.5
PLPP4	-1.51751	0.605667	-2.50552	0.0663737	1.178	1 vs 2	0.461531	NS or Estimate < 0.5
SAMD5	-0.771834	0.938941	-0.822026	0.457237	0.339859	1 vs 2	0.827895	NS or Estimate < 0.5
RPS28	2.52298	0.746295	3.38068	0.0277681	1.55645	1 vs 2	0.349483	P < 0.05
SPDYE2	-0.0310365	0.507324	-0.0611768	0.954153	0.0203819	1 vs 2	0.981787	NS or Estimate < 0.5
ZNF816	-0.0952515	0.340291	-0.279912	0.793424	0.100495	1 vs 2	0.958417	NS or Estimate < 0.5
CYB5RL	-0.384001	0.809885	-0.474143	0.660121	0.180376	1 vs 2	0.915482	NS or Estimate < 0.5
IFIT3	-0.169382	0.554738	-0.305337	0.775339	0.110509	1 vs 2	0.955711	NS or Estimate < 0.5
SRSF7	-1.47168	0.290061	-5.07369	0.00711204	2.14801	1 vs 2	0.224932	P < 0.05
TP53BP2	-0.805012	0.754354	-1.06716	0.346028	0.460888	1 vs 2	0.780377	NS or Estimate < 0.5
PLAA	0.497284	0.615852	0.807473	0.464672	0.332853	1 vs 2	0.835174	NS or Estimate < 0.5
SCMH1	1.21462	0.683098	1.7781	0.150015	0.823864	1 vs 2	0.612832	NS or Estimate < 0.5
PLD3	1.46625	0.724477	2.02387	0.112999	0.946927	1 vs 2	0.566742	NS or Estimate < 0.5
GASK1B	0.163951	0.826105	0.198463	0.852362	0.069376	1 vs 2	0.969587	NS or Estimate < 0.5
CT55	-1.03104	0.490396	-2.10246	0.103366	0.985621	1 vs 2	0.544675	NS or Estimate < 0.5
RNLS	-0.559357	0.694508	-0.8054	0.465739	0.331857	1 vs 2	0.835191	NS or Estimate < 0.5
ERGIC1	-0.610025	0.570297	-1.06966	0.345024	0.46215	1 vs 2	0.780377	NS or Estimate < 0.5
TRMT11	1.55393	0.213309	7.28486	0.00188707	2.72421	1 vs 2	0.131838	P < 0.05
MCUR1	-1.22602	0.697407	-1.75798	0.153579	0.813667	1 vs 2	0.619406	NS or Estimate < 0.5
DHRS12	-0.697703	0.587414	-1.18775	0.300639	0.521955	1 vs 2	0.744215	NS or Estimate < 0.5
DNAJB14	-0.313702	0.717464	-0.437237	0.684509	0.164621	1 vs 2	0.922342	NS or Estimate < 0.5
DDX59	-0.559357	0.350181	-1.59734	0.185429	0.731822	1 vs 2	0.645212	NS or Estimate < 0.5
CFAP206	-1.13835	0.593694	-1.91739	0.127654	0.893966	1 vs 2	0.590701	NS or Estimate < 0.5
ALDH3A2	-0.36437	0.615852	-0.591651	0.585904	0.232174	1 vs 2	0.883155	NS or Estimate < 0.5
CSNK1G3	1.60459	0.239213	6.7078	0.00257083	2.58993	1 vs 2	0.152667	P < 0.05
RPS29	-0.323175	0.469706	-0.688037	0.529252	0.276337	1 vs 2	0.857806	NS or Estimate < 0.5
RCE1	1.07627	0.533302	2.01813	0.11374	0.944087	1 vs 2	0.568147	NS or Estimate < 0.5
TMPO	1.87371	0.522058	3.58909	0.0229804	1.63864	1 vs 2	0.32193	P < 0.05
PSRC1	0.0256052	0.874795	0.0292699	0.978051	0.00963829	1 vs 2	0.98226	NS or Estimate < 0.5
STK24	1.48374	0.72855	2.03656	0.111378	0.9532	1 vs 2	0.563434	NS or Estimate < 0.5
SPINT1	1.46625	0.609271	2.40656	0.0738293	1.13177	1 vs 2	0.475738	NS or Estimate < 0.5
LCMT1	1.10731	0.250607	4.41851	0.0115242	1.93839	1 vs 2	0.259464	P < 0.05
HNRNPH2	-0.0310365	0.645963	-0.0480468	0.963982	0.015931	1 vs 2	0.981787	NS or Estimate < 0.5
OAS1	0.63563	0.42135	1.50856	0.205908	0.686327	1 vs 2	0.65587	NS or Estimate < 0.5
USP16	0.409606	0.729423	0.561548	0.604395	0.218679	1 vs 2	0.890621	NS or Estimate < 0.5
RRM1	1.22059	0.373795	3.26541	0.0309227	1.50972	1 vs 2	0.356426	P < 0.05
FBXO7	-0.0310365	0.985085	-0.0315064	0.976375	0.0103833	1 vs 2	0.981787	NS or Estimate < 0.5
EXTL2	-0.138346	0.814558	-0.169842	0.873378	0.0587975	1 vs 2	0.978893	NS or Estimate < 0.5
GLUL	1.12211	0.607154	1.84814	0.138287	0.859219	1 vs 2	0.605507	NS or Estimate < 0.5
NGRN	0.358939	0.413762	0.8675	0.434612	0.361899	1 vs 2	0.81584	NS or Estimate < 0.5
SRGAP3	-0.0876781	0.821191	-0.10677	0.920112	0.0361591	1 vs 2	0.981787	NS or Estimate < 0.5
SAR1B	-1.03104	0.69724	-1.47874	0.213292	0.671026	1 vs 2	0.661785	NS or Estimate < 0.5
TMEM98	0.497284	0.600328	0.828355	0.454033	0.342913	1 vs 2	0.82588	NS or Estimate < 0.5
CSTF3	-0.410204	0.970793	-0.422546	0.694351	0.158421	1 vs 2	0.923993	NS or Estimate < 0.5
CSTF1	-1.03104	0.574099	-1.79592	0.146934	0.832877	1 vs 2	0.609195	NS or Estimate < 0.5
PPM1B	0.302297	0.395742	0.763873	0.487514	0.312013	1 vs 2	0.836278	NS or Estimate < 0.5
DNAAF4	-0.226024	0.675248	-0.334727	0.754647	0.122256	1 vs 2	0.947394	NS or Estimate < 0.5
PHF12	0.0762729	0.872607	0.087408	0.934548	0.0293983	1 vs 2	0.981787	NS or Estimate < 0.5
AMZ2	1.9183	1.0368	1.85021	0.137955	0.860262	1 vs 2	0.605507	NS or Estimate < 0.5
RARA	-0.36437	0.197375	-1.84608	0.138618	0.85818	1 vs 2	0.605507	NS or Estimate < 0.5
TRPT1	-0.697703	0.823644	-0.847093	0.444651	0.351981	1 vs 2	0.825183	NS or Estimate < 0.5
ZNF404	-0.0876781	0.674597	-0.129971	0.902863	0.0443781	1 vs 2	0.981787	NS or Estimate < 0.5
DCLRE1C	-1.93578	0.291695	-6.63632	0.00267548	2.5726	1 vs 2	0.153504	P < 0.05
TRAF5	-0.307728	0.859704	-0.357947	0.738473	0.131665	1 vs 2	0.944972	NS or Estimate < 0.5
DMAP1	0.830618	0.501091	1.65762	0.172735	0.76262	1 vs 2	0.639738	NS or Estimate < 0.5
ERP29	0.63563	0.739176	0.859917	0.43832	0.358208	1 vs 2	0.81891	NS or Estimate < 0.5
EXOSC9	-0.754345	0.590883	-1.27664	0.270808	0.567338	1 vs 2	0.714411	NS or Estimate < 0.5
NHP2	0.285239	0.487868	0.584665	0.590162	0.229029	1 vs 2	0.8852	NS or Estimate < 0.5
KCNIP1	0.214619	0.760088	0.28236	0.791675	0.101453	1 vs 2	0.957995	NS or Estimate < 0.5
ITPRIPL2	-0.226024	0.499256	-0.452722	0.674217	0.1712	1 vs 2	0.915741	NS or Estimate < 0.5
KCNIP3	-0.276692	0.710137	-0.389631	0.716665	0.144684	1 vs 2	0.931075	NS or Estimate < 0.5
SORBS1	-0.333333	0.321364	-1.03724	0.358207	0.445866	1 vs 2	0.784724	NS or Estimate < 0.5
C18orf32	0.497284	0.766387	0.648868	0.551796	0.258222	1 vs 2	0.870726	NS or Estimate < 0.5
RGL3	1.27126	0.430376	2.95384	0.0418095	1.37872	1 vs 2	0.390704	P < 0.05
UFD1	1.27126	0.540863	2.35043	0.0784784	1.10525	1 vs 2	0.486993	NS or Estimate < 0.5
FAM102A	1.02561	0.523235	1.96012	0.121537	0.91529	1 vs 2	0.578938	NS or Estimate < 0.5
RPL38	2.00132	0.829811	2.41178	0.0734132	1.13423	1 vs 2	0.474633	NS or Estimate < 0.5
RYR3	-0.559357	0.555181	-1.00752	0.370684	0.430996	1 vs 2	0.792142	NS or Estimate < 0.5
EXOC4	-0.138346	0.689977	-0.200508	0.850865	0.0701391	1 vs 2	0.969587	NS or Estimate < 0.5
CYS1	-1.95816	0.703275	-2.78434	0.0495981	1.30454	1 vs 2	0.418891	P < 0.05
FAM220A	-1.33333	0.551593	-2.41724	0.0729805	1.13679	1 vs 2	0.473774	NS or Estimate < 0.5
ARL4A	1.06273	0.769232	1.38154	0.239265	0.621121	1 vs 2	0.688323	NS or Estimate < 0.5
FOXK1	1.02561	0.844161	1.21494	0.291199	0.53581	1 vs 2	0.737149	NS or Estimate < 0.5
ARL5A	0.497284	0.569757	0.8728	0.432035	0.364481	1 vs 2	0.81584	NS or Estimate < 0.5
ZNF829	0.497284	0.791195	0.628523	0.563765	0.248902	1 vs 2	0.878578	NS or Estimate < 0.5
GGPS1	-0.36437	0.713792	-0.510471	0.636602	0.196132	1 vs 2	0.905172	NS or Estimate < 0.5
EIF3B	0.163951	0.86768	0.188953	0.859329	0.0658403	1 vs 2	0.972165	NS or Estimate < 0.5
CMTM5	-1.6977	0.523705	-3.24172	0.0316225	1.5	1 vs 2	0.359439	P < 0.05
TRIM16L	-0.943358	0.602709	-1.5652	0.19259	0.715366	1 vs 2	0.645212	NS or Estimate < 0.5
PDE4B	-0.754345	0.482555	-1.56323	0.193037	0.714359	1 vs 2	0.645212	NS or Estimate < 0.5
CDKL5	0.63563	1.07146	0.59324	0.584938	0.23289	1 vs 2	0.883155	NS or Estimate < 0.5
AGPAT3	-1.80501	0.405951	-4.44638	0.0112782	1.94776	1 vs 2	0.254691	P < 0.05
SIL1	0.0566417	0.986403	0.0574224	0.956963	0.019105	1 vs 2	0.981787	NS or Estimate < 0.5
BTF3	1.60564	0.57791	2.77835	0.0499026	1.30188	1 vs 2	0.419394	P < 0.05
PARL	-0.169382	1.04719	-0.161749	0.879345	0.0558408	1 vs 2	0.980027	NS or Estimate < 0.5
EEF1B2	1.80374	0.817286	2.20699	0.0919334	1.03653	1 vs 2	0.522765	NS or Estimate < 0.5
DEFB116	0.163951	0.698852	0.234601	0.826038	0.0829998	1 vs 2	0.959809	NS or Estimate < 0.5
DEFB128	-0.0310365	0.645963	-0.0480468	0.963982	0.015931	1 vs 2	0.981787	NS or Estimate < 0.5
ZNF284	-0.118715	0.813537	-0.145924	0.89104	0.0501029	1 vs 2	0.980027	NS or Estimate < 0.5
SLC38A10	0.302297	0.48905	0.618131	0.569947	0.244165	1 vs 2	0.880995	NS or Estimate < 0.5
SCNN1A	0.81707	1.11098	0.735451	0.502859	0.298554	1 vs 2	0.84377	NS or Estimate < 0.5
MARVELD2	-0.138346	0.855353	-0.161741	0.879351	0.0558379	1 vs 2	0.980027	NS or Estimate < 0.5
GOLGA6A	-0.226024	0.72492	-0.311792	0.770775	0.113073	1 vs 2	0.955559	NS or Estimate < 0.5
CDC42SE2	-0.36437	0.614234	-0.59321	0.584956	0.232877	1 vs 2	0.883155	NS or Estimate < 0.5
CDC42SE1	0.547952	0.705989	0.776148	0.480998	0.317857	1 vs 2	0.836278	NS or Estimate < 0.5
PRPS2	-0.36437	1.01997	-0.357238	0.738965	0.131376	1 vs 2	0.944972	NS or Estimate < 0.5
ZNF718	-0.0310365	0.629065	-0.0493374	0.963016	0.0163666	1 vs 2	0.981787	NS or Estimate < 0.5
RGS21	-1.08768	0.513279	-2.11908	0.101447	0.993759	1 vs 2	0.542921	NS or Estimate < 0.5
MRGPRE	-0.276692	0.903652	-0.306193	0.774733	0.110848	1 vs 2	0.955711	NS or Estimate < 0.5
BOLA2B	-0.805012	0.850628	-0.946375	0.397545	0.400614	1 vs 2	0.801018	NS or Estimate < 0.5
ALG13	0.302297	0.48905	0.618131	0.569947	0.244165	1 vs 2	0.880995	NS or Estimate < 0.5
ATAD3C	0.302297	0.593525	0.509324	0.637337	0.195631	1 vs 2	0.905172	NS or Estimate < 0.5
CEACAM16	-0.300155	0.294698	-1.01852	0.366025	0.43649	1 vs 2	0.791387	NS or Estimate < 0.5
SLC25A29	0.0430943	0.975728	0.0441664	0.966889	0.0146235	1 vs 2	0.981787	NS or Estimate < 0.5
ZBTB7C	-0.36437	0.527322	-0.690982	0.527585	0.277708	1 vs 2	0.857003	NS or Estimate < 0.5
ATP6V1E1	0.968964	0.58284	1.66249	0.17175	0.765103	1 vs 2	0.639738	NS or Estimate < 0.5
SPATA6L	-1.08768	0.714914	-1.52141	0.202805	0.692921	1 vs 2	0.65587	NS or Estimate < 0.5
SRSF5	0.453134	0.52403	0.86471	0.435973	0.36054	1 vs 2	0.817052	NS or Estimate < 0.5
THEMIS2	-1.86165	0.138346	-13.4565	0.00017644	3.7534	1 vs 2	0.038554	FDR < 0.05
AREL1	-0.502716	0.524938	-0.957668	0.392462	0.406202	1 vs 2	0.798252	NS or Estimate < 0.5
ETNK1	-0.754345	0.857762	-0.879434	0.428827	0.367718	1 vs 2	0.81584	NS or Estimate < 0.5
FHL2	-0.502716	0.720841	-0.697402	0.523961	0.280701	1 vs 2	0.85577	NS or Estimate < 0.5
PRSS53	-0.0310365	0.781922	-0.0396925	0.97024	0.0131207	1 vs 2	0.981787	NS or Estimate < 0.5
GK5	-0.610025	0.726496	-0.839682	0.448343	0.34839	1 vs 2	0.82588	NS or Estimate < 0.5
SEC14L1	-0.892691	0.60179	-1.48339	0.212123	0.673413	1 vs 2	0.661785	NS or Estimate < 0.5
CCNL2	-0.276692	0.349976	-0.790602	0.47341	0.324762	1 vs 2	0.836278	NS or Estimate < 0.5
MAP9	-0.169382	0.666536	-0.254123	0.811929	0.0904819	1 vs 2	0.959122	NS or Estimate < 0.5
USP9X	-0.610025	0.702318	-0.868589	0.434081	0.362429	1 vs 2	0.81584	NS or Estimate < 0.5
SPAG8	0.63563	0.610156	1.04175	0.356348	0.448125	1 vs 2	0.783453	NS or Estimate < 0.5
IAH1	-0.0310365	0.687791	-0.0451249	0.966171	0.0149461	1 vs 2	0.981787	NS or Estimate < 0.5
ZMYM5	-0.559357	0.780764	-0.716423	0.513332	0.289601	1 vs 2	0.852396	NS or Estimate < 0.5
SAPCD1	-0.0310365	0.507324	-0.0611768	0.954153	0.0203819	1 vs 2	0.981787	NS or Estimate < 0.5
IL18BP	0.497284	0.478356	1.03957	0.357247	0.447032	1 vs 2	0.784629	NS or Estimate < 0.5
TYW5	0.830618	0.509537	1.63014	0.178405	0.748593	1 vs 2	0.639907	NS or Estimate < 0.5
SNAPC3	0.955416	0.588534	1.62338	0.179829	0.745139	1 vs 2	0.641712	NS or Estimate < 0.5
ENTR1	1.16395	0.782203	1.48804	0.21096	0.6758	1 vs 2	0.661785	NS or Estimate < 0.5
DEDD	1.60459	0.290616	5.52136	0.00525411	2.2795	1 vs 2	0.20427	P < 0.05
ABHD18	-0.805012	0.568678	-1.41559	0.229826	0.6386	1 vs 2	0.679905	NS or Estimate < 0.5
CCNI2	0.830618	0.719458	1.1545	0.312572	0.505051	1 vs 2	0.74785	NS or Estimate < 0.5
CDC42	0.848965	0.594833	1.42723	0.226683	0.64458	1 vs 2	0.679905	NS or Estimate < 0.5
CHIC1	0.497284	0.558826	0.889873	0.423818	0.37282	1 vs 2	0.81584	NS or Estimate < 0.5
IZUMO4	-0.754345	0.672408	-1.12186	0.324715	0.488498	1 vs 2	0.758117	NS or Estimate < 0.5
GPX4	-0.152702	0.403019	-0.378895	0.724019	0.14025	1 vs 2	0.937448	NS or Estimate < 0.5
STRN4	0.968964	0.615495	1.57428	0.190537	0.72002	1 vs 2	0.645212	NS or Estimate < 0.5
FKRP	-0.0310365	0.527322	-0.0588568	0.955889	0.0195924	1 vs 2	0.981787	NS or Estimate < 0.5
ZNF384	-0.666667	0.665282	-1.00208	0.373009	0.428281	1 vs 2	0.792142	NS or Estimate < 0.5
MESP2	-0.892691	0.587238	-1.52015	0.203107	0.692275	1 vs 2	0.65587	NS or Estimate < 0.5
MEOX1	-1.03104	0.52108	-1.97865	0.118985	0.924508	1 vs 2	0.574247	NS or Estimate < 0.5
TCERG1	0.358939	0.527739	0.680144	0.533742	0.272669	1 vs 2	0.857806	NS or Estimate < 0.5
SWI5	-0.0310365	0.633144	-0.0490196	0.963254	0.0162593	1 vs 2	0.981787	NS or Estimate < 0.5
FAM3C	-2.1446	0.569982	-3.76258	0.0197308	1.70486	1 vs 2	0.319614	P < 0.05
ARL16	0.830618	0.509537	1.63014	0.178405	0.748593	1 vs 2	0.639907	NS or Estimate < 0.5
C8orf74	1.05664	0.693268	1.52415	0.202151	0.694324	1 vs 2	0.65587	NS or Estimate < 0.5
MAPK3	0.63563	0.713792	0.890498	0.42352	0.373126	1 vs 2	0.81584	NS or Estimate < 0.5
FAM133B	0.692272	0.652219	1.06141	0.348338	0.457999	1 vs 2	0.780557	NS or Estimate < 0.5
MUC17	-1.10731	0.703499	-1.574	0.190601	0.719875	1 vs 2	0.645212	NS or Estimate < 0.5
NRF1	0.850249	0.923945	0.920238	0.409524	0.387721	1 vs 2	0.808836	NS or Estimate < 0.5
MYH11	0.904749	0.478195	1.89201	0.131446	0.881254	1 vs 2	0.597549	NS or Estimate < 0.5
ARAP1	-1.22602	0.473901	-2.58709	0.0608706	1.21559	1 vs 2	0.453837	NS or Estimate < 0.5
PALM	-0.169382	0.730588	-0.231844	0.828037	0.0819502	1 vs 2	0.959809	NS or Estimate < 0.5
ACTR3B	0.0430943	0.547089	0.0787702	0.940999	0.026411	1 vs 2	0.981787	NS or Estimate < 0.5
CHTF8	1.57142	0.428422	3.66791	0.0214305	1.66897	1 vs 2	0.32193	P < 0.05
SERPINB7	-0.892691	0.728904	-1.2247	0.287878	0.540791	1 vs 2	0.731629	NS or Estimate < 0.5
PEG10	-0.559357	0.417031	-1.34128	0.250921	0.600463	1 vs 2	0.696283	NS or Estimate < 0.5
HTR4	-0.226024	0.417031	-0.541984	0.61661	0.209989	1 vs 2	0.89684	NS or Estimate < 0.5
AKR1E2	-0.133513	0.441262	-0.30257	0.777299	0.109412	1 vs 2	0.956648	NS or Estimate < 0.5
CLDND1	0.440643	0.294714	1.49515	0.209195	0.679448	1 vs 2	0.659232	NS or Estimate < 0.5
ZNF765	0.433069	0.753731	0.574568	0.596352	0.224497	1 vs 2	0.886183	NS or Estimate < 0.5
TYSND1	0.483737	0.37449	1.29172	0.266036	0.57506	1 vs 2	0.711693	NS or Estimate < 0.5
PRDM15	1.21462	0.544556	2.23048	0.0895636	1.04787	1 vs 2	0.517832	NS or Estimate < 0.5
U2AF1L4	-0.697703	0.542052	-1.28715	0.267474	0.572719	1 vs 2	0.711823	NS or Estimate < 0.5
COA3	0.163951	0.710304	0.230818	0.828781	0.08156	1 vs 2	0.959809	NS or Estimate < 0.5
YARS2	0.723308	0.669069	1.08107	0.340491	0.467895	1 vs 2	0.776309	NS or Estimate < 0.5
MAPK8IP3	-0.169382	0.743902	-0.227695	0.831049	0.0803734	1 vs 2	0.96081	NS or Estimate < 0.5
ZBTB8A	-0.0310365	0.58284	-0.0532504	0.960086	0.01769	1 vs 2	0.981787	NS or Estimate < 0.5
PHF11	0.358939	0.666516	0.538529	0.618782	0.208462	1 vs 2	0.898444	NS or Estimate < 0.5
ASB1	0.830618	0.640555	1.29672	0.264474	0.577617	1 vs 2	0.708467	NS or Estimate < 0.5
RUFY1	0.107309	0.612737	0.175131	0.869484	0.0607383	1 vs 2	0.978566	NS or Estimate < 0.5
SLC26A6	-0.276692	0.948494	-0.291717	0.785007	0.105127	1 vs 2	0.957229	NS or Estimate < 0.5
SIDT2	0.63563	0.728177	0.872906	0.431983	0.364533	1 vs 2	0.81584	NS or Estimate < 0.5
RHBDD2	-0.471679	0.765167	-0.61644	0.570958	0.243396	1 vs 2	0.880995	NS or Estimate < 0.5
ERAP1	0.376428	0.951822	0.395481	0.712673	0.14711	1 vs 2	0.931075	NS or Estimate < 0.5
NCALD	0.269118	0.766889	0.350922	0.74335	0.128807	1 vs 2	0.944972	NS or Estimate < 0.5
CRCP	0.723308	0.787894	0.918027	0.410551	0.386633	1 vs 2	0.808836	NS or Estimate < 0.5
ACP1	-0.36437	0.41972	-0.868125	0.434307	0.362203	1 vs 2	0.81584	NS or Estimate < 0.5
ZXDC	-0.892691	0.566388	-1.57611	0.190127	0.720955	1 vs 2	0.645212	NS or Estimate < 0.5
TTC23	0.74294	0.539977	1.37587	0.240873	0.618211	1 vs 2	0.688323	NS or Estimate < 0.5
GAGE1	-0.610025	0.293417	-2.07904	0.106138	0.974128	1 vs 2	0.552198	NS or Estimate < 0.5
INCENP	0.358939	0.730588	0.491301	0.648951	0.187788	1 vs 2	0.911602	NS or Estimate < 0.5
UEVLD	1.07627	0.645547	1.66723	0.170797	0.76752	1 vs 2	0.639738	NS or Estimate < 0.5
KIAA0895L	0.251629	0.806521	0.311993	0.770632	0.113153	1 vs 2	0.955498	NS or Estimate < 0.5
GDAP1	0.302297	0.618764	0.48855	0.650735	0.186596	1 vs 2	0.912486	NS or Estimate < 0.5
ABCE1	-0.276692	0.395855	-0.698972	0.523078	0.281433	1 vs 2	0.85577	NS or Estimate < 0.5
RALGDS	-1.03104	0.213309	-4.83354	0.00843957	2.07368	1 vs 2	0.236624	P < 0.05
RO60	0.163951	0.563986	0.290701	0.78573	0.104727	1 vs 2	0.957229	NS or Estimate < 0.5
PREPL	0.497284	0.36005	1.38115	0.239375	0.620922	1 vs 2	0.688323	NS or Estimate < 0.5
PPP4R1	-1.13835	0.7211	-1.57862	0.189565	0.722242	1 vs 2	0.645212	NS or Estimate < 0.5
ANKZF1	0.63563	0.373795	1.70048	0.164263	0.784461	1 vs 2	0.634465	NS or Estimate < 0.5
CYLD	2.16395	0.712105	3.03881	0.038447	1.41514	1 vs 2	0.385221	P < 0.05
ZNF596	-1.03104	0.719152	-1.43368	0.224961	0.647893	1 vs 2	0.679905	NS or Estimate < 0.5
RUFY2	-0.226024	0.579547	-0.390001	0.716412	0.144837	1 vs 2	0.931075	NS or Estimate < 0.5
CAST	-0.226024	0.558803	-0.404479	0.706555	0.150854	1 vs 2	0.930178	NS or Estimate < 0.5
TGFB1I1	-0.452048	0.886166	-0.510116	0.636829	0.195977	1 vs 2	0.905172	NS or Estimate < 0.5
TMEM80	-0.0876781	0.857762	-0.102217	0.923503	0.0345615	1 vs 2	0.981787	NS or Estimate < 0.5
SUMF2	-0.697703	0.321133	-2.17263	0.0955285	1.01987	1 vs 2	0.528141	NS or Estimate < 0.5
GSDMB	-0.36437	0.827607	-0.440269	0.682487	0.165905	1 vs 2	0.922342	NS or Estimate < 0.5
ACBD5	0.63563	0.692531	0.917836	0.41064	0.386539	1 vs 2	0.808836	NS or Estimate < 0.5
DEFA1B	-0.504858	0.600082	-0.841314	0.447527	0.34918	1 vs 2	0.82588	NS or Estimate < 0.5
LGALS7B	-0.559357	0.69937	-0.799801	0.46863	0.32917	1 vs 2	0.836278	NS or Estimate < 0.5
C2orf88	0.709761	0.37073	1.91449	0.128081	0.892515	1 vs 2	0.591188	NS or Estimate < 0.5
RIOX2	-0.943358	0.502143	-1.87867	0.133487	0.874562	1 vs 2	0.601276	NS or Estimate < 0.5
NCBP2	-1.13835	0.489946	-2.32341	0.0808336	1.09241	1 vs 2	0.496508	NS or Estimate < 0.5
EIF4G2	0.96139	0.894701	1.07454	0.34308	0.464605	1 vs 2	0.779002	NS or Estimate < 0.5
CHD2	0.423154	0.529094	0.799771	0.468646	0.329155	1 vs 2	0.836278	NS or Estimate < 0.5
SNUPN	-0.169382	0.696887	-0.243056	0.819918	0.0862298	1 vs 2	0.959809	NS or Estimate < 0.5
ERBB4	1.16395	0.350845	3.31756	0.0294455	1.53098	1 vs 2	0.353277	P < 0.05
SNX21	-0.697703	0.469102	-1.48732	0.211141	0.675428	1 vs 2	0.661785	NS or Estimate < 0.5
NGDN	0.302297	0.952555	0.317354	0.76685	0.115289	1 vs 2	0.95288	NS or Estimate < 0.5
SHPRH	0.163951	0.563986	0.290701	0.78573	0.104727	1 vs 2	0.957229	NS or Estimate < 0.5
IQCJ	-0.836049	0.716287	-1.1672	0.307965	0.511499	1 vs 2	0.746824	NS or Estimate < 0.5
GTPBP10	0.107309	0.677428	0.158407	0.881812	0.0546241	1 vs 2	0.980027	NS or Estimate < 0.5
NECTIN2	1.27126	0.430376	2.95384	0.0418095	1.37872	1 vs 2	0.390704	P < 0.05
SEC24B	0.302297	0.26383	1.1458	0.315768	0.500632	1 vs 2	0.750588	NS or Estimate < 0.5
STAG2	0.904749	0.906169	0.998432	0.374575	0.426462	1 vs 2	0.792142	NS or Estimate < 0.5
CSKMT	-1.22602	0.810986	-1.51177	0.205128	0.687975	1 vs 2	0.65587	NS or Estimate < 0.5
ELMSAN1	-0.138346	0.585043	-0.236471	0.824683	0.0837131	1 vs 2	0.959809	NS or Estimate < 0.5
TPM3	1.36207	0.814847	1.67157	0.169928	0.769734	1 vs 2	0.639738	NS or Estimate < 0.5
SLC6A3	0.302297	0.766791	0.394236	0.713522	0.146593	1 vs 2	0.931075	NS or Estimate < 0.5
NUTM2G	0.968964	0.615495	1.57428	0.190537	0.72002	1 vs 2	0.645212	NS or Estimate < 0.5
SLC12A2	1.4698	0.823299	1.78525	0.148771	0.827482	1 vs 2	0.609931	NS or Estimate < 0.5
SRD5A1	-0.943358	0.239081	-3.94577	0.0168778	1.77268	1 vs 2	0.287135	P < 0.05
DPH3	-0.805012	0.870697	-0.924561	0.407522	0.389849	1 vs 2	0.808836	NS or Estimate < 0.5
SST	0.163951	0.636159	0.25772	0.809339	0.0918697	1 vs 2	0.959122	NS or Estimate < 0.5
PHACTR4	-0.559357	0.633144	-0.88346	0.426889	0.369685	1 vs 2	0.81584	NS or Estimate < 0.5
CLCC1	0.988595	0.628741	1.57234	0.190975	0.719024	1 vs 2	0.645212	NS or Estimate < 0.5
DBNDD2	-0.785381	0.850057	-0.923916	0.40782	0.389532	1 vs 2	0.808836	NS or Estimate < 0.5
UBL5	0.278834	0.71946	0.38756	0.718081	0.143827	1 vs 2	0.932325	NS or Estimate < 0.5
SMIM15	1.49728	0.406701	3.68153	0.0211754	1.67417	1 vs 2	0.32193	P < 0.05
SSTR4	-0.226024	0.47914	-0.471728	0.661702	0.179338	1 vs 2	0.915482	NS or Estimate < 0.5
SULT1A2	-0.974395	0.892358	-1.09193	0.336222	0.473374	1 vs 2	0.771266	NS or Estimate < 0.5
TBXAS1	-0.36437	0.382448	-0.952731	0.394677	0.403758	1 vs 2	0.798252	NS or Estimate < 0.5
TKT	0.547952	0.768312	0.71319	0.515128	0.288085	1 vs 2	0.852396	NS or Estimate < 0.5
TNFRSF1A	0.0256052	0.429286	0.059646	0.955299	0.0198609	1 vs 2	0.981787	NS or Estimate < 0.5
TNFRSF1B	-0.0310365	0.450741	-0.0688566	0.948409	0.0230046	1 vs 2	0.981787	NS or Estimate < 0.5
TOP2B	-0.169382	0.666536	-0.254123	0.811929	0.0904819	1 vs 2	0.959122	NS or Estimate < 0.5
TUBB2A	0.245655	0.482555	0.509072	0.637498	0.195521	1 vs 2	0.905172	NS or Estimate < 0.5
TUBG1	0.968964	0.615495	1.57428	0.190537	0.72002	1 vs 2	0.645212	NS or Estimate < 0.5
MZT1	1.3023	0.618764	2.10467	0.103108	0.986708	1 vs 2	0.544675	NS or Estimate < 0.5
UGT2B11	-0.276692	0.755056	-0.366452	0.732588	0.13514	1 vs 2	0.943645	NS or Estimate < 0.5
MOCS1	-0.610025	0.702318	-0.868589	0.434081	0.362429	1 vs 2	0.81584	NS or Estimate < 0.5
UGT2B15	-0.0310365	0.58284	-0.0532504	0.960086	0.01769	1 vs 2	0.981787	NS or Estimate < 0.5
LYRM9	0.74294	0.884808	0.839662	0.448353	0.34838	1 vs 2	0.82588	NS or Estimate < 0.5
ZNF391	0.74294	0.760785	0.976544	0.38409	0.415567	1 vs 2	0.79512	NS or Estimate < 0.5
SLC7A6	-1.28267	0.907689	-1.41311	0.2305	0.637329	1 vs 2	0.679905	NS or Estimate < 0.5
QSER1	0.92438	0.599429	1.5421	0.197911	0.70353	1 vs 2	0.652712	NS or Estimate < 0.5
METTL9	-1.616	0.676735	-2.38793	0.0753366	1.12299	1 vs 2	0.477892	NS or Estimate < 0.5
CDC14B	-0.828476	0.370531	-2.23591	0.0890245	1.05049	1 vs 2	0.517477	NS or Estimate < 0.5
FSCN2	0.63563	0.610156	1.04175	0.356348	0.448125	1 vs 2	0.783453	NS or Estimate < 0.5
MYH14	0.409606	0.757378	0.540822	0.61734	0.209475	1 vs 2	0.897139	NS or Estimate < 0.5
HS6ST2	-0.138346	0.462739	-0.298972	0.779851	0.107988	1 vs 2	0.956648	NS or Estimate < 0.5
ZNF436	-0.118715	0.985023	-0.12052	0.909883	0.0410146	1 vs 2	0.981787	NS or Estimate < 0.5
ATG9A	-1.60245	0.681746	-2.35051	0.0784717	1.10529	1 vs 2	0.486993	NS or Estimate < 0.5
SPPL2B	1.13077	0.622919	1.81528	0.143663	0.842655	1 vs 2	0.609195	NS or Estimate < 0.5
UBXN11	0.317095	0.673207	0.471021	0.662165	0.179034	1 vs 2	0.915482	NS or Estimate < 0.5
WIPF1	0.389975	0.626764	0.622204	0.567519	0.24602	1 vs 2	0.88016	NS or Estimate < 0.5
ZNF682	0.968964	1.03072	0.940081	0.400402	0.397504	1 vs 2	0.803388	NS or Estimate < 0.5
DPH5	-0.559357	0.808782	-0.691604	0.527233	0.277998	1 vs 2	0.857003	NS or Estimate < 0.5
TMEM231	-0.0310365	0.450741	-0.0688566	0.948409	0.0230046	1 vs 2	0.981787	NS or Estimate < 0.5
ZNF586	-0.943358	0.535437	-1.76185	0.152887	0.815629	1 vs 2	0.618169	NS or Estimate < 0.5
BCLAF1	0.302297	0.593525	0.509324	0.637337	0.195631	1 vs 2	0.905172	NS or Estimate < 0.5
TSEN34	-0.0310365	0.339837	-0.0913275	0.931623	0.0307597	1 vs 2	0.981787	NS or Estimate < 0.5
SLC38A1	-0.36437	0.732321	-0.497555	0.644907	0.190503	1 vs 2	0.909756	NS or Estimate < 0.5
KLK5	2.07627	0.413614	5.01984	0.00738622	2.13158	1 vs 2	0.224932	P < 0.05
NFKB2	-1.36437	0.706709	-1.9306	0.125729	0.900564	1 vs 2	0.58952	NS or Estimate < 0.5
FAM222B	1.22059	0.373795	3.26541	0.0309227	1.50972	1 vs 2	0.356426	P < 0.05
SLC39A7	0.497284	0.569757	0.8728	0.432035	0.364481	1 vs 2	0.81584	NS or Estimate < 0.5
UBXN2B	0.937927	0.784551	1.1955	0.297922	0.525898	1 vs 2	0.744215	NS or Estimate < 0.5
VPS37D	-1.22602	0.995506	-1.23156	0.285568	0.544291	1 vs 2	0.731612	NS or Estimate < 0.5
APH1A	0.830618	0.277447	2.99378	0.0401877	1.39591	1 vs 2	0.386057	P < 0.05
TNFAIP8	-0.0310365	0.629065	-0.0493374	0.963016	0.0163666	1 vs 2	0.981787	NS or Estimate < 0.5
SMCO1	0.497284	0.503075	0.98849	0.378871	0.421509	1 vs 2	0.792142	NS or Estimate < 0.5
ALG9	-0.892691	0.672427	-1.32757	0.255019	0.593427	1 vs 2	0.697482	NS or Estimate < 0.5
MIER1	-0.697703	0.658906	-1.05888	0.34936	0.456727	1 vs 2	0.780557	NS or Estimate < 0.5
RGPD2	0.497284	0.569757	0.8728	0.432035	0.364481	1 vs 2	0.81584	NS or Estimate < 0.5
RTL8C	1.46645	0.413255	3.54853	0.0238301	1.62287	1 vs 2	0.32247	P < 0.05
RTL8A	-0.949332	0.395742	-2.39887	0.0744478	1.12815	1 vs 2	0.47788	NS or Estimate < 0.5
ASAH2B	-0.151893	0.874328	-0.173726	0.870519	0.060222	1 vs 2	0.978566	NS or Estimate < 0.5
KTN1	1.56275	0.698806	2.23631	0.0889851	1.05068	1 vs 2	0.517477	NS or Estimate < 0.5
TRAPPC6B	0.553926	0.490396	1.12955	0.321815	0.492394	1 vs 2	0.756178	NS or Estimate < 0.5
HNRNPUL2	0.107309	0.909426	0.117997	0.911758	0.0401203	1 vs 2	0.981787	NS or Estimate < 0.5
TMTC4	-1.08768	0.348924	-3.11724	0.0356216	1.44829	1 vs 2	0.370006	P < 0.05
FNDC3A	-0.0310365	0.471466	-0.0658297	0.950672	0.0219692	1 vs 2	0.981787	NS or Estimate < 0.5
KIAA1191	-0.421011	0.672408	-0.626125	0.565188	0.247807	1 vs 2	0.879707	NS or Estimate < 0.5
N4BP2L1	1.02561	0.371679	2.75939	0.0508816	1.29344	1 vs 2	0.422414	NS or Estimate < 0.5
PGA3	1.54038	0.541512	2.84459	0.0466504	1.33114	1 vs 2	0.412306	P < 0.05
XIRP2	1.02561	0.569757	1.80007	0.146226	0.834976	1 vs 2	0.609195	NS or Estimate < 0.5
CLRN2	-1.33333	0.497607	-2.67949	0.0552579	1.25761	1 vs 2	0.436833	NS or Estimate < 0.5
OCIAD1	-0.590394	0.444244	-1.32898	0.254592	0.594155	1 vs 2	0.697482	NS or Estimate < 0.5
CASZ1	0.968964	0.709193	1.36629	0.243617	0.613293	1 vs 2	0.692818	NS or Estimate < 0.5
DBI	-0.923727	1.12876	-0.818358	0.459102	0.338091	1 vs 2	0.83098	NS or Estimate < 0.5
BCS1L	0.194988	0.441867	0.441281	0.681814	0.166334	1 vs 2	0.922342	NS or Estimate < 0.5
CUL4B	0.358939	0.730588	0.491301	0.648951	0.187788	1 vs 2	0.911602	NS or Estimate < 0.5
VAV3	1.07627	0.944621	1.13937	0.318148	0.497371	1 vs 2	0.753546	NS or Estimate < 0.5
RASA4	-0.387833	0.223678	-1.73389	0.157962	0.801447	1 vs 2	0.628544	NS or Estimate < 0.5
PRKD2	1.74294	0.397217	4.38787	0.0118022	1.92804	1 vs 2	0.261789	P < 0.05
OR7E24	-0.064215	0.522725	-0.122847	0.908154	0.0418407	1 vs 2	0.981787	NS or Estimate < 0.5
LDB3	0.74294	0.600935	1.23631	0.283978	0.546715	1 vs 2	0.730111	NS or Estimate < 0.5
CT47A10	0.578989	0.795672	0.727672	0.507122	0.294888	1 vs 2	0.848369	NS or Estimate < 0.5
ECPAS	1.25771	0.679625	1.8506	0.137894	0.860455	1 vs 2	0.605507	NS or Estimate < 0.5
PLIN4	-1.13835	0.592139	-1.92243	0.126916	0.896483	1 vs 2	0.58952	NS or Estimate < 0.5
PPM1N	-0.0310365	0.915859	-0.0338878	0.97459	0.011178	1 vs 2	0.981787	NS or Estimate < 0.5
ZNF99	-0.226024	0.499256	-0.452722	0.674217	0.1712	1 vs 2	0.915741	NS or Estimate < 0.5
U2SURP	0.830618	0.58284	1.42512	0.22725	0.643496	1 vs 2	0.679905	NS or Estimate < 0.5
DLGAP3	-0.836049	0.750823	-1.11351	0.327888	0.484275	1 vs 2	0.759578	NS or Estimate < 0.5
UNK	0.497284	0.706215	0.704155	0.52017	0.283855	1 vs 2	0.853378	NS or Estimate < 0.5
KDM6B	-1.384	0.591255	-2.34079	0.0793101	1.10067	1 vs 2	0.489569	NS or Estimate < 0.5
SLC45A4	0.0256052	0.720841	0.0355213	0.973366	0.0117238	1 vs 2	0.981787	NS or Estimate < 0.5
FTO	0.163951	0.556367	0.294681	0.782898	0.106295	1 vs 2	0.957229	NS or Estimate < 0.5
LMTK3	-1.28267	0.853848	-1.50222	0.207456	0.683075	1 vs 2	0.657381	NS or Estimate < 0.5
IGSF5	-0.502716	0.642107	-0.782915	0.477434	0.321087	1 vs 2	0.836278	NS or Estimate < 0.5
SERPINA11	-1.22602	0.39799	-3.08054	0.0369123	1.43283	1 vs 2	0.373487	P < 0.05
GPR108	-0.943358	0.913749	-1.0324	0.360213	0.44344	1 vs 2	0.786797	NS or Estimate < 0.5
INTS1	-0.892691	0.672427	-1.32757	0.255019	0.593427	1 vs 2	0.697482	NS or Estimate < 0.5
MYO5B	0.321928	0.565663	0.569117	0.599711	0.222058	1 vs 2	0.88794	NS or Estimate < 0.5
FBXO46	-1.42101	0.390313	-3.64069	0.0219512	1.65854	1 vs 2	0.32193	P < 0.05
PLEKHM3	0.830618	0.277447	2.99378	0.0401877	1.39591	1 vs 2	0.386057	P < 0.05
TENM3	-1.03104	0.527322	-1.95523	0.122221	0.912853	1 vs 2	0.581063	NS or Estimate < 0.5
ARHGEF28	0.63563	0.674808	0.941942	0.399556	0.398423	1 vs 2	0.802393	NS or Estimate < 0.5
MBOAT1	-0.0310365	0.60477	-0.0513195	0.961531	0.0170365	1 vs 2	0.981787	NS or Estimate < 0.5
AJM1	-1	0.579899	-1.72444	0.159718	0.796645	1 vs 2	0.631671	NS or Estimate < 0.5
PABPN1L	-0.966821	0.569587	-1.69741	0.164855	0.782898	1 vs 2	0.634465	NS or Estimate < 0.5
PRSS54	-1.36437	0.197375	-6.91257	0.00229777	2.63869	1 vs 2	0.140465	P < 0.05
ZNF823	-0.0876781	0.674597	-0.129971	0.902863	0.0443781	1 vs 2	0.981787	NS or Estimate < 0.5
TNRC18	-0.892691	0.881803	-1.01235	0.368633	0.433406	1 vs 2	0.792142	NS or Estimate < 0.5
RGP1	-0.892691	0.63912	-1.39675	0.235002	0.628929	1 vs 2	0.687205	NS or Estimate < 0.5
MEGF9	-0.0310365	0.526242	-0.0589775	0.955799	0.0196335	1 vs 2	0.981787	NS or Estimate < 0.5
CCDC159	-0.226024	0.499256	-0.452722	0.674217	0.1712	1 vs 2	0.915741	NS or Estimate < 0.5
TBX18	-0.226024	0.750513	-0.301159	0.778299	0.108853	1 vs 2	0.956648	NS or Estimate < 0.5
TSPAN11	-1.69895	0.529723	-3.20725	0.0326744	1.48579	1 vs 2	0.362298	P < 0.05
SETD5	0.251629	0.469445	0.536014	0.620367	0.207351	1 vs 2	0.899248	NS or Estimate < 0.5
RASSF10	0.584963	0.482977	1.21116	0.292495	0.533882	1 vs 2	0.739153	NS or Estimate < 0.5
WIPF3	1.83062	0.509537	3.59271	0.0229064	1.64004	1 vs 2	0.32193	P < 0.05
C4orf51	-2.49514	0.250368	-9.96589	0.000569488	3.24452	1 vs 2	0.0722054	P < 0.05
UNC119B	-0.169382	0.855165	-0.19807	0.852649	0.0692295	1 vs 2	0.969587	NS or Estimate < 0.5
UNC13C	0.497284	0.600328	0.828355	0.454033	0.342913	1 vs 2	0.82588	NS or Estimate < 0.5
AKR1B15	-0.697703	0.592958	-1.17665	0.304576	0.516304	1 vs 2	0.744215	NS or Estimate < 0.5
MGA	-0.805012	0.269381	-2.98838	0.0404027	1.39359	1 vs 2	0.386856	P < 0.05
ZNF799	-0.395406	0.898758	-0.439947	0.682702	0.165769	1 vs 2	0.922342	NS or Estimate < 0.5
TMEM120B	-0.36437	0.527322	-0.690982	0.527585	0.277708	1 vs 2	0.857003	NS or Estimate < 0.5
DMRTC1B	-0.892691	0.354367	-2.51912	0.0654183	1.1843	1 vs 2	0.459008	NS or Estimate < 0.5
PXN	0.302297	0.73935	0.408868	0.70358	0.152686	1 vs 2	0.928612	NS or Estimate < 0.5
JMJD6	-0.697703	0.504614	-1.38265	0.238952	0.621689	1 vs 2	0.688323	NS or Estimate < 0.5
THOC2	-0.836049	0.716287	-1.1672	0.307965	0.511499	1 vs 2	0.746824	NS or Estimate < 0.5
SPAG11A	-1.45419	0.644132	-2.2576	0.0869113	1.06092	1 vs 2	0.513296	NS or Estimate < 0.5
ELN	-0.610025	0.62321	-0.978844	0.38308	0.41671	1 vs 2	0.79512	NS or Estimate < 0.5
ACD	-0.559357	0.417031	-1.34128	0.250921	0.600463	1 vs 2	0.696283	NS or Estimate < 0.5
NKAPD1	0.497284	0.733697	0.677779	0.535092	0.271572	1 vs 2	0.857806	NS or Estimate < 0.5
GPD2	-0.36437	0.373795	-0.974786	0.384863	0.414694	1 vs 2	0.79512	NS or Estimate < 0.5
ZNF133	0.163951	0.61732	0.265585	0.803685	0.0949141	1 vs 2	0.959122	NS or Estimate < 0.5
FAM86B1	1.23808	0.459362	2.69522	0.0543628	1.2647	1 vs 2	0.435496	NS or Estimate < 0.5
RABEP1	-0.697703	0.759267	-0.918917	0.410137	0.387071	1 vs 2	0.808836	NS or Estimate < 0.5
NARF	-0.0310365	0.645963	-0.0480468	0.963982	0.015931	1 vs 2	0.981787	NS or Estimate < 0.5
RB1CC1	-0.280524	0.578281	-0.485099	0.652976	0.185103	1 vs 2	0.912997	NS or Estimate < 0.5
STRN3	-0.666667	0.602924	-1.10572	0.330874	0.480338	1 vs 2	0.76344	NS or Estimate < 0.5
GP6	-0.666667	0.626045	-1.06489	0.346939	0.459746	1 vs 2	0.780557	NS or Estimate < 0.5
BANK1	-0.118715	0.785688	-0.151096	0.887213	0.0519719	1 vs 2	0.980027	NS or Estimate < 0.5
ADGRA1	-0.892691	0.70394	-1.26813	0.273536	0.562986	1 vs 2	0.715723	NS or Estimate < 0.5
WBP1L	0.107309	0.629394	0.170496	0.872896	0.0590373	1 vs 2	0.978566	NS or Estimate < 0.5
ZNF655	0.547952	0.517701	1.05843	0.349541	0.456502	1 vs 2	0.780557	NS or Estimate < 0.5
TCF4	0.107309	0.952555	0.112654	0.915732	0.0382316	1 vs 2	0.981787	NS or Estimate < 0.5
PLOD3	0.63563	0.925774	0.686594	0.530071	0.275666	1 vs 2	0.857806	NS or Estimate < 0.5
DDTL	0.497284	0.600328	0.828355	0.454033	0.342913	1 vs 2	0.82588	NS or Estimate < 0.5
SERPINA3	-0.559357	0.558803	-1.00099	0.373475	0.427738	1 vs 2	0.792142	NS or Estimate < 0.5
MCC	-0.943358	0.602709	-1.5652	0.19259	0.715366	1 vs 2	0.645212	NS or Estimate < 0.5
TMEM213	-0.379168	0.650052	-0.583289	0.591003	0.22841	1 vs 2	0.885332	NS or Estimate < 0.5
MYSM1	1.70976	0.616969	2.77123	0.0502679	1.29871	1 vs 2	0.421455	NS or Estimate < 0.5
NDUFAF8	0.881285	0.161903	5.44331	0.00553091	2.2572	1 vs 2	0.208832	P < 0.05
AAMP	-0.36437	0.551751	-0.660388	0.545097	0.263526	1 vs 2	0.867392	NS or Estimate < 0.5
ABCA3	-0.226024	0.499256	-0.452722	0.674217	0.1712	1 vs 2	0.915741	NS or Estimate < 0.5
ABCF1	0.830618	0.509537	1.63014	0.178405	0.748593	1 vs 2	0.639907	NS or Estimate < 0.5
ABR	-0.966821	0.793215	-1.21886	0.28986	0.537812	1 vs 2	0.734685	NS or Estimate < 0.5
ACACB	-0.559357	0.558803	-1.00099	0.373475	0.427738	1 vs 2	0.792142	NS or Estimate < 0.5
CCDC102B	1.3023	0.507324	2.56699	0.0621762	1.20638	1 vs 2	0.453837	NS or Estimate < 0.5
TRAPPC13	0.497284	0.569757	0.8728	0.432035	0.364481	1 vs 2	0.81584	NS or Estimate < 0.5
MCRIP1	0.547952	0.367523	1.49093	0.210241	0.677283	1 vs 2	0.661511	NS or Estimate < 0.5
ASIC1	0.497284	0.632428	0.78631	0.475654	0.322709	1 vs 2	0.836278	NS or Estimate < 0.5
ACR	-0.169382	0.554738	-0.305337	0.775339	0.110509	1 vs 2	0.955711	NS or Estimate < 0.5
SPRR3	-0.697703	0.408604	-1.70753	0.162912	0.788048	1 vs 2	0.634465	NS or Estimate < 0.5
SLC35G2	0.766403	0.83008	0.923287	0.408111	0.389222	1 vs 2	0.808836	NS or Estimate < 0.5
GPR89A	0.464106	0.721615	0.643149	0.555143	0.255595	1 vs 2	0.872092	NS or Estimate < 0.5
TMEM184A	0.74294	0.457242	1.62483	0.179524	0.745878	1 vs 2	0.640845	NS or Estimate < 0.5
ACO2	1.93793	0.418184	4.63415	0.00977675	2.00981	1 vs 2	0.242529	P < 0.05
GPR18	-1.55936	0.647742	-2.40737	0.0737644	1.13215	1 vs 2	0.475738	NS or Estimate < 0.5
HNRNPF	-0.966821	0.877225	-1.10214	0.332257	0.478526	1 vs 2	0.765428	NS or Estimate < 0.5
CTNNB1	2.06858	0.538337	3.84253	0.0184196	1.73472	1 vs 2	0.305112	P < 0.05
HDAC7	-0.697703	0.507324	-1.37526	0.241047	0.617898	1 vs 2	0.688323	NS or Estimate < 0.5
DLG1	1.20705	0.503614	2.39677	0.0746175	1.12716	1 vs 2	0.47788	NS or Estimate < 0.5
SMARCD2	0.302297	0.846287	0.357204	0.738988	0.131363	1 vs 2	0.944972	NS or Estimate < 0.5
GRSF1	-0.36437	0.789919	-0.461275	0.668569	0.174854	1 vs 2	0.915741	NS or Estimate < 0.5
SLC4A4	-1.03104	0.475018	-2.17052	0.0957544	1.01884	1 vs 2	0.528141	NS or Estimate < 0.5
ZNF419	0.63563	0.60477	1.05103	0.352548	0.452782	1 vs 2	0.782171	NS or Estimate < 0.5
CHCHD4	0.547952	0.517701	1.05843	0.349541	0.456502	1 vs 2	0.780557	NS or Estimate < 0.5
PTPRJ	-0.559357	0.555181	-1.00752	0.370684	0.430996	1 vs 2	0.792142	NS or Estimate < 0.5
RAPGEF3	0.409606	0.893881	0.458233	0.670575	0.173553	1 vs 2	0.915741	NS or Estimate < 0.5
SIGLEC14	-1.94933	0.197375	-9.87628	0.000589742	3.22934	1 vs 2	0.0738616	P < 0.05
PUS7L	-0.0310365	0.645963	-0.0480468	0.963982	0.015931	1 vs 2	0.981787	NS or Estimate < 0.5
OBSCN	-2.68146	0.452639	-5.92407	0.00406787	2.39063	1 vs 2	0.177774	P < 0.05
RBM47	1.3023	0.593525	2.19417	0.0932568	1.03032	1 vs 2	0.524793	NS or Estimate < 0.5
RNF169	-0.559357	0.354695	-1.57701	0.189926	0.721416	1 vs 2	0.645212	NS or Estimate < 0.5
GTF2H2C	-0.0876781	0.632428	-0.138637	0.896436	0.0474806	1 vs 2	0.981357	NS or Estimate < 0.5
BET1L	1.39989	0.535305	2.61513	0.0591009	1.22841	1 vs 2	0.44756	NS or Estimate < 0.5
CEP78	-0.754345	0.482555	-1.56323	0.193037	0.714359	1 vs 2	0.645212	NS or Estimate < 0.5
C9orf129	-0.0310365	0.817751	-0.0379535	0.971543	0.0125378	1 vs 2	0.981787	NS or Estimate < 0.5
SEPTIN8	0.584963	0.968346	0.604084	0.578375	0.23779	1 vs 2	0.882449	NS or Estimate < 0.5
TMEM91	-0.36437	0.636159	-0.572765	0.597462	0.22369	1 vs 2	0.886183	NS or Estimate < 0.5
RAD51AP2	-1.82848	0.626931	-2.91655	0.0433929	1.36258	1 vs 2	0.397487	P < 0.05
CCDC43	0.163951	0.492685	0.33277	0.756017	0.121468	1 vs 2	0.947394	NS or Estimate < 0.5
ZNF506	1.41098	0.308064	4.58015	0.0101823	1.99215	1 vs 2	0.24504	P < 0.05
ZBTB34	-0.0310365	0.213309	-0.1455	0.891354	0.04995	1 vs 2	0.980027	NS or Estimate < 0.5
TINF2	0.0566417	0.765167	0.0740252	0.944544	0.0247776	1 vs 2	0.981787	NS or Estimate < 0.5
MROH1	0.0566417	0.765167	0.0740252	0.944544	0.0247776	1 vs 2	0.981787	NS or Estimate < 0.5
NUTM2A	1.40961	0.618764	2.2781	0.0849644	1.07076	1 vs 2	0.507907	NS or Estimate < 0.5
COMMD7	-1.94933	0.452002	-4.31266	0.0125197	1.90241	1 vs 2	0.268002	P < 0.05
SGCE	0.409606	0.729423	0.561548	0.604395	0.218679	1 vs 2	0.890621	NS or Estimate < 0.5
KAT6A	0.302297	0.924753	0.326895	0.760138	0.119107	1 vs 2	0.950203	NS or Estimate < 0.5
BCAS3	-0.576846	0.818483	-0.704775	0.519823	0.284145	1 vs 2	0.853378	NS or Estimate < 0.5
ULK3	-0.610025	0.938488	-0.650008	0.55113	0.258746	1 vs 2	0.870726	NS or Estimate < 0.5
CPPED1	0.497284	0.600328	0.828355	0.454033	0.342913	1 vs 2	0.82588	NS or Estimate < 0.5
LRRC58	-1.08768	0.422148	-2.57654	0.0615522	1.21076	1 vs 2	0.453837	NS or Estimate < 0.5
NXF2	0.937927	0.633168	1.48132	0.212642	0.672352	1 vs 2	0.661785	NS or Estimate < 0.5
EIF5AL1	-0.0310365	0.58284	-0.0532504	0.960086	0.01769	1 vs 2	0.981787	NS or Estimate < 0.5
ZNF578	1.3279	0.544746	2.43765	0.0713888	1.14637	1 vs 2	0.471497	NS or Estimate < 0.5
RSPH10B2	-0.754345	0.6938	-1.08727	0.33805	0.47102	1 vs 2	0.774084	NS or Estimate < 0.5
FBXL19	-0.36437	0.875115	-0.416368	0.698512	0.155826	1 vs 2	0.924091	NS or Estimate < 0.5
ITPR1	0.63563	0.197375	3.22042	0.0322677	1.49123	1 vs 2	0.360206	P < 0.05
PDS5A	1.08982	0.818632	1.33127	0.253906	0.595327	1 vs 2	0.697482	NS or Estimate < 0.5
SENP6	0.547952	0.580355	0.944167	0.398545	0.399522	1 vs 2	0.802063	NS or Estimate < 0.5
FAM184A	-1.55936	0.371679	-4.19544	0.0137461	1.86182	1 vs 2	0.26978	P < 0.05
DROSHA	0.302297	1.12692	0.268251	0.801772	0.095949	1 vs 2	0.959122	NS or Estimate < 0.5
UBR7	0.358939	0.667892	0.53742	0.619481	0.207972	1 vs 2	0.898471	NS or Estimate < 0.5
REX1BD	-1.89269	0.519141	-3.64581	0.0218521	1.66051	1 vs 2	0.32193	P < 0.05
SPATS2L	-1.08768	0.348924	-3.11724	0.0356216	1.44829	1 vs 2	0.370006	P < 0.05
RAP1GDS1	0.107309	0.499256	0.214939	0.840329	0.0755507	1 vs 2	0.963512	NS or Estimate < 0.5
VSIG4	-0.754345	0.482555	-1.56323	0.193037	0.714359	1 vs 2	0.645212	NS or Estimate < 0.5
PLEKHB2	-0.559357	0.70394	-0.79461	0.471323	0.326681	1 vs 2	0.836278	NS or Estimate < 0.5
CXCL16	0.766403	0.956586	0.801185	0.467914	0.329834	1 vs 2	0.836278	NS or Estimate < 0.5
TMEM176B	1.40961	0.756968	1.86218	0.136057	0.866278	1 vs 2	0.604741	NS or Estimate < 0.5
ZNF883	0.497284	0.632428	0.78631	0.475654	0.322709	1 vs 2	0.836278	NS or Estimate < 0.5
CCDC160	0.692272	0.452744	1.52906	0.200982	0.696842	1 vs 2	0.65587	NS or Estimate < 0.5
IGLON5	-0.105167	1.0518	-0.0999881	0.925165	0.033781	1 vs 2	0.981787	NS or Estimate < 0.5
CLDN25	-0.633488	1.00163	-0.632457	0.561437	0.250699	1 vs 2	0.877753	NS or Estimate < 0.5
CXXC1	-0.559357	0.657039	-0.851331	0.442551	0.354037	1 vs 2	0.822922	NS or Estimate < 0.5
NRDC	0.968964	0.373795	2.59223	0.0605412	1.21795	1 vs 2	0.452704	NS or Estimate < 0.5
ACOX3	0.830618	0.709193	1.17122	0.30652	0.513541	1 vs 2	0.745962	NS or Estimate < 0.5
ZNF219	-0.169382	0.277447	-0.610502	0.574514	0.240699	1 vs 2	0.882449	NS or Estimate < 0.5
SAMD12	-0.226024	0.647563	-0.349038	0.74466	0.128042	1 vs 2	0.944972	NS or Estimate < 0.5
FAM13B	2.05329	0.517089	3.97086	0.0165268	1.78181	1 vs 2	0.283829	P < 0.05
ACTN1	2.27525	0.362023	6.28483	0.00327352	2.48499	1 vs 2	0.168095	P < 0.05
DGLUCY	-0.641061	0.121232	-5.2879	0.00613719	2.21203	1 vs 2	0.213222	P < 0.05
FOXRED2	-0.226024	0.706032	-0.320133	0.764892	0.1164	1 vs 2	0.952028	NS or Estimate < 0.5
TTI2	-0.892691	0.354695	-2.51679	0.0655809	1.18322	1 vs 2	0.459008	NS or Estimate < 0.5
PCTP	1.40961	0.615332	2.29081	0.0837826	1.07685	1 vs 2	0.502544	NS or Estimate < 0.5
RGS8	-0.36437	0.382448	-0.952731	0.394677	0.403758	1 vs 2	0.798252	NS or Estimate < 0.5
AQP12B	0.830618	0.719458	1.1545	0.312572	0.505051	1 vs 2	0.74785	NS or Estimate < 0.5
IFT43	0.107309	0.629394	0.170496	0.872896	0.0590373	1 vs 2	0.978566	NS or Estimate < 0.5
COL6A6	-0.0620729	0.989894	-0.0627066	0.953009	0.0209032	1 vs 2	0.981787	NS or Estimate < 0.5
SLC35G6	0.692272	0.39028	1.77378	0.150773	0.821677	1 vs 2	0.615336	NS or Estimate < 0.5
ZNF554	0.497284	0.618764	0.803674	0.466629	0.331028	1 vs 2	0.836203	NS or Estimate < 0.5
ZNF836	1.40961	0.200317	7.03689	0.00214936	2.66769	1 vs 2	0.134597	P < 0.05
RRAS2	0.766403	0.636711	1.20369	0.295071	0.530074	1 vs 2	0.742194	NS or Estimate < 0.5
GIGYF2	0.358939	0.554738	0.647041	0.552863	0.257382	1 vs 2	0.870726	NS or Estimate < 0.5
PNMA8A	-0.36437	0.618576	-0.589047	0.587489	0.231	1 vs 2	0.883526	NS or Estimate < 0.5
AADACL3	-0.452048	0.727737	-0.62117	0.568135	0.245549	1 vs 2	0.880716	NS or Estimate < 0.5
BICDL2	-0.333333	0.658169	-0.506455	0.639177	0.194379	1 vs 2	0.906929	NS or Estimate < 0.5
CNPY1	-0.0310365	0.213309	-0.1455	0.891354	0.04995	1 vs 2	0.980027	NS or Estimate < 0.5
ACVR1	0.302297	0.704932	0.428831	0.690132	0.161068	1 vs 2	0.923324	NS or Estimate < 0.5
FBRS	-2.36098	0.365652	-6.45689	0.00296222	2.52838	1 vs 2	0.160837	P < 0.05
LAMA4	1.16395	0.691941	1.68215	0.16783	0.77513	1 vs 2	0.636783	NS or Estimate < 0.5
ASH2L	-1	0.728883	-1.37196	0.241989	0.616204	1 vs 2	0.689957	NS or Estimate < 0.5
CORO1C	0.0430943	0.867378	0.0496834	0.962757	0.0164835	1 vs 2	0.981787	NS or Estimate < 0.5
ARMC5	-0.36437	0.933051	-0.390514	0.716062	0.14505	1 vs 2	0.931075	NS or Estimate < 0.5
ZFYVE16	0.302297	0.593525	0.509324	0.637337	0.195631	1 vs 2	0.905172	NS or Estimate < 0.5
SWT1	0.358939	0.865088	0.414916	0.699492	0.155217	1 vs 2	0.92503	NS or Estimate < 0.5
NUDT19	1.02561	0.431389	2.37745	0.0762007	1.11804	1 vs 2	0.480721	NS or Estimate < 0.5
HMX3	-0.36437	0.478356	-0.761713	0.488668	0.310986	1 vs 2	0.836575	NS or Estimate < 0.5
SOWAHD	-0.0310365	0.761817	-0.0407401	0.969456	0.0134721	1 vs 2	0.981787	NS or Estimate < 0.5
LRRC30	-1.03104	0.364937	-2.82525	0.0475739	1.32263	1 vs 2	0.412424	P < 0.05
TTC24	-0.892691	0.587238	-1.52015	0.203107	0.692275	1 vs 2	0.65587	NS or Estimate < 0.5
ACYP1	-0.0310365	0.507324	-0.0611768	0.954153	0.0203819	1 vs 2	0.981787	NS or Estimate < 0.5
HECTD4	-1.33333	0.616302	-2.16344	0.0965164	1.0154	1 vs 2	0.530593	NS or Estimate < 0.5
GSG1L	0.302297	0.629065	0.480549	0.655938	0.183137	1 vs 2	0.912997	NS or Estimate < 0.5
ZFP57	-0.836049	0.716287	-1.1672	0.307965	0.511499	1 vs 2	0.746824	NS or Estimate < 0.5
SYNPO	1.16395	0.350845	3.31756	0.0294455	1.53098	1 vs 2	0.353277	P < 0.05
FAM160A1	0.251629	0.883441	0.284828	0.789914	0.10242	1 vs 2	0.957995	NS or Estimate < 0.5
ADAM10	-0.836049	0.563986	-1.48239	0.212373	0.672901	1 vs 2	0.661785	NS or Estimate < 0.5
PRH2	0.497284	0.645963	0.769834	0.484341	0.314849	1 vs 2	0.836278	NS or Estimate < 0.5
TMEM87A	-1.66667	0.333333	-5	0.00749043	2.12549	1 vs 2	0.224932	P < 0.05
SLC35E2B	-0.340907	0.835728	-0.407916	0.704225	0.152288	1 vs 2	0.928907	NS or Estimate < 0.5
MECP2	-1.75434	0.245655	-7.14149	0.00203355	2.69174	1 vs 2	0.133195	P < 0.05
NAA16	-1.08768	0.76972	-1.41308	0.230508	0.637315	1 vs 2	0.679905	NS or Estimate < 0.5
ADAR	-0.0310365	0.724152	-0.042859	0.967868	0.0141839	1 vs 2	0.981787	NS or Estimate < 0.5
NAV2	0.74294	0.521385	1.42494	0.2273	0.643401	1 vs 2	0.679905	NS or Estimate < 0.5
NHLH2	-1.13835	0.785539	-1.44913	0.220891	0.655822	1 vs 2	0.672761	NS or Estimate < 0.5
ARHGEF25	-0.36437	0.494257	-0.737207	0.501901	0.299382	1 vs 2	0.84238	NS or Estimate < 0.5
DDX54	0.126941	0.504492	0.25162	0.813733	0.089518	1 vs 2	0.959122	NS or Estimate < 0.5
TASOR	0.163951	0.693017	0.236576	0.824607	0.0837529	1 vs 2	0.959809	NS or Estimate < 0.5
TSTD1	0.793607	0.474862	1.67124	0.169994	0.769567	1 vs 2	0.639738	NS or Estimate < 0.5
TEN1	-0.771834	0.777096	-0.993229	0.376818	0.423869	1 vs 2	0.792142	NS or Estimate < 0.5
TBC1D14	0.440643	1.03689	0.424966	0.692725	0.159439	1 vs 2	0.92369	NS or Estimate < 0.5
FER1L5	-1.22602	0.39799	-3.08054	0.0369123	1.43283	1 vs 2	0.373487	P < 0.05
LDB1	1.02561	0.589694	1.73922	0.156982	0.804151	1 vs 2	0.626584	NS or Estimate < 0.5
ARHGEF7	0.302297	0.84615	0.357262	0.738948	0.131386	1 vs 2	0.944972	NS or Estimate < 0.5
ZNF276	0.27126	0.977444	0.27752	0.795133	0.09956	1 vs 2	0.959062	NS or Estimate < 0.5
LIMA1	0.77995	0.609388	1.27989	0.269773	0.569002	1 vs 2	0.712596	NS or Estimate < 0.5
RNF180	0.302297	0.704932	0.428831	0.690132	0.161068	1 vs 2	0.923324	NS or Estimate < 0.5
ENTPD6	0.830618	0.736143	1.12834	0.32227	0.49178	1 vs 2	0.756178	NS or Estimate < 0.5
LSM14A	-0.578989	0.825024	-0.701783	0.521499	0.282747	1 vs 2	0.854688	NS or Estimate < 0.5
C1QC	0.464106	1.13815	0.407771	0.704323	0.152228	1 vs 2	0.928907	NS or Estimate < 0.5
SLC44A3	-0.610025	0.663414	-0.919524	0.409855	0.38737	1 vs 2	0.808836	NS or Estimate < 0.5
TTC22	0.497284	0.600328	0.828355	0.454033	0.342913	1 vs 2	0.82588	NS or Estimate < 0.5
CTSC	0.163951	0.750823	0.218362	0.837835	0.0768413	1 vs 2	0.963234	NS or Estimate < 0.5
AEBP2	0.584963	0.834621	0.700872	0.52201	0.282321	1 vs 2	0.855168	NS or Estimate < 0.5
CLCN7	-0.697703	0.494257	-1.41162	0.230907	0.636564	1 vs 2	0.679905	NS or Estimate < 0.5
TENT2	-0.226024	0.543045	-0.416216	0.698615	0.155762	1 vs 2	0.924108	NS or Estimate < 0.5
DHX36	0.409606	0.830231	0.493364	0.647615	0.188683	1 vs 2	0.911602	NS or Estimate < 0.5
SZRD1	-0.276692	0.563155	-0.491325	0.648936	0.187798	1 vs 2	0.911602	NS or Estimate < 0.5
JMJD7	0.497284	0.962926	0.516431	0.632792	0.198739	1 vs 2	0.905172	NS or Estimate < 0.5
FANCL	0.107309	0.844023	0.12714	0.904964	0.0433685	1 vs 2	0.981787	NS or Estimate < 0.5
PRRT4	-0.559357	0.750513	-0.7453	0.497501	0.303206	1 vs 2	0.840244	NS or Estimate < 0.5
TMEM240	-0.169382	0.554738	-0.305337	0.775339	0.110509	1 vs 2	0.955711	NS or Estimate < 0.5
ENG	-0.697703	0.593525	-1.17552	0.304977	0.515732	1 vs 2	0.744215	NS or Estimate < 0.5
ADCY8	-1.08768	0.58397	-1.86256	0.135997	0.866471	1 vs 2	0.604741	NS or Estimate < 0.5
KANSL3	0.497284	0.791195	0.628523	0.563765	0.248902	1 vs 2	0.878578	NS or Estimate < 0.5
WDR26	-0.0310365	0.573874	-0.0540824	0.959463	0.0179718	1 vs 2	0.981787	NS or Estimate < 0.5
ADCY9	0.63563	0.699961	0.908094	0.415192	0.381751	1 vs 2	0.813123	NS or Estimate < 0.5
ADCYAP1	0.107309	0.985872	0.108847	0.918566	0.0368899	1 vs 2	0.981787	NS or Estimate < 0.5
ADD1	1.96139	0.415274	4.72312	0.00915045	2.03856	1 vs 2	0.237199	P < 0.05
ADD3	0.830618	0.875933	0.948267	0.39669	0.401549	1 vs 2	0.800551	NS or Estimate < 0.5
PLIN2	-0.0310365	0.507324	-0.0611768	0.954153	0.0203819	1 vs 2	0.981787	NS or Estimate < 0.5
ABCD3	0.63563	0.824366	0.771053	0.483694	0.315429	1 vs 2	0.836278	NS or Estimate < 0.5
TENM2	-1.22602	0.620016	-1.97741	0.119155	0.923889	1 vs 2	0.574247	NS or Estimate < 0.5
PRR32	0.107309	0.672427	0.159585	0.880942	0.0550527	1 vs 2	0.980027	NS or Estimate < 0.5
ZBTB37	-0.697703	0.823644	-0.847093	0.444651	0.351981	1 vs 2	0.825183	NS or Estimate < 0.5
SLC50A1	-0.169382	0.367726	-0.460621	0.669	0.174574	1 vs 2	0.915741	NS or Estimate < 0.5
NAPEPLD	-0.502716	0.669381	-0.751015	0.494412	0.305911	1 vs 2	0.83969	NS or Estimate < 0.5
GGT6	1.3023	0.614423	2.11954	0.101394	0.993988	1 vs 2	0.542921	NS or Estimate < 0.5
C1orf194	0.497284	0.791195	0.628523	0.563765	0.248902	1 vs 2	0.878578	NS or Estimate < 0.5
RPTN	-0.0310365	0.373795	-0.0830308	0.937816	0.0278823	1 vs 2	0.981787	NS or Estimate < 0.5
ADK	0.571415	0.982133	0.581811	0.591908	0.227746	1 vs 2	0.885332	NS or Estimate < 0.5
ARIH2OS	0.409606	0.693375	0.590742	0.586456	0.231764	1 vs 2	0.883155	NS or Estimate < 0.5
CCR2	-0.0310365	0.213309	-0.1455	0.891354	0.04995	1 vs 2	0.980027	NS or Estimate < 0.5
ZBTB1	1.35894	0.842669	1.61266	0.182114	0.739658	1 vs 2	0.644404	NS or Estimate < 0.5
PARK7	0.773976	0.406383	1.90455	0.129558	0.887537	1 vs 2	0.592116	NS or Estimate < 0.5
ADSL	0.497284	0.540976	0.919235	0.409989	0.387227	1 vs 2	0.808836	NS or Estimate < 0.5
KRTAP2-1	0.968964	0.695271	1.39365	0.235865	0.627337	1 vs 2	0.687605	NS or Estimate < 0.5
ADM	0.497284	0.503075	0.98849	0.378871	0.421509	1 vs 2	0.792142	NS or Estimate < 0.5
PABPC1L	-0.535894	0.845826	-0.633575	0.560777	0.25121	1 vs 2	0.877655	NS or Estimate < 0.5
CASK	1.00214	0.639018	1.56825	0.191897	0.716931	1 vs 2	0.645212	NS or Estimate < 0.5
SLC12A3	-0.559357	0.486505	-1.14975	0.314315	0.502635	1 vs 2	0.74785	NS or Estimate < 0.5
SLC25A19	-0.313702	0.47276	-0.663554	0.543266	0.264988	1 vs 2	0.86505	NS or Estimate < 0.5
THTPA	0.0256052	0.844161	0.0303321	0.977255	0.00999199	1 vs 2	0.982132	NS or Estimate < 0.5
PIGG	-0.118715	0.460426	-0.257836	0.809255	0.0919145	1 vs 2	0.959122	NS or Estimate < 0.5
MYO7A	-1.33333	0.603388	-2.20974	0.0916523	1.03786	1 vs 2	0.522057	NS or Estimate < 0.5
CENPL	0.63563	0.610156	1.04175	0.356348	0.448125	1 vs 2	0.783453	NS or Estimate < 0.5
CFLAR	1.16395	0.645642	1.80278	0.145766	0.836343	1 vs 2	0.609195	NS or Estimate < 0.5
PCID2	0.464106	0.380776	1.21884	0.289868	0.5378	1 vs 2	0.734685	NS or Estimate < 0.5
HMOX2	-0.502716	0.712232	-0.705831	0.519231	0.284639	1 vs 2	0.853378	NS or Estimate < 0.5
TET2	1.02561	0.535547	1.91506	0.127997	0.892799	1 vs 2	0.591188	NS or Estimate < 0.5
AURKAIP1	-0.522347	0.317718	-1.64406	0.175509	0.755701	1 vs 2	0.639907	NS or Estimate < 0.5
GPBP1	1.07627	0.645547	1.66723	0.170797	0.76752	1 vs 2	0.639738	NS or Estimate < 0.5
UBAP2L	0.214619	0.839383	0.255686	0.810803	0.0910846	1 vs 2	0.959122	NS or Estimate < 0.5
MAD2L2	-0.0310365	0.761817	-0.0407401	0.969456	0.0134721	1 vs 2	0.981787	NS or Estimate < 0.5
CDCA7L	0.440643	0.371679	1.18555	0.301417	0.520832	1 vs 2	0.744215	NS or Estimate < 0.5
MYRF	1.27126	0.717464	1.77188	0.151108	0.820713	1 vs 2	0.615336	NS or Estimate < 0.5
STXBP2	0.497284	0.569757	0.8728	0.432035	0.364481	1 vs 2	0.81584	NS or Estimate < 0.5
YPEL5	-0.407464	0.941319	-0.432865	0.687431	0.162771	1 vs 2	0.923324	NS or Estimate < 0.5
CRY2	0.497284	0.596372	0.833849	0.451266	0.345568	1 vs 2	0.82588	NS or Estimate < 0.5
ZNF469	-1.03104	0.52108	-1.97865	0.118985	0.924508	1 vs 2	0.574247	NS or Estimate < 0.5
ANK2	-1.36437	0.382448	-3.56747	0.0234288	1.63025	1 vs 2	0.32193	P < 0.05
ING4	0.228166	0.253382	0.900484	0.418777	0.378017	1 vs 2	0.815377	NS or Estimate < 0.5
KCNE1	0.302297	0.618764	0.48855	0.650735	0.186596	1 vs 2	0.912486	NS or Estimate < 0.5
BEX4	-0.54581	1.00398	-0.543646	0.615566	0.210725	1 vs 2	0.89684	NS or Estimate < 0.5
CTSA	-0.912322	0.760169	-1.20016	0.296297	0.528273	1 vs 2	0.744096	NS or Estimate < 0.5
ETFA	0.251629	0.582739	0.431804	0.68814	0.162323	1 vs 2	0.923324	NS or Estimate < 0.5
CEACAM19	-0.138346	1.04472	-0.132423	0.901044	0.0452542	1 vs 2	0.981787	NS or Estimate < 0.5
KRTAP20-3	-1	0.603388	-1.65731	0.172798	0.762462	1 vs 2	0.639738	NS or Estimate < 0.5
AP4S1	-0.559357	0.417031	-1.34128	0.250921	0.600463	1 vs 2	0.696283	NS or Estimate < 0.5
ZEB1	-0.226024	0.417031	-0.541984	0.61661	0.209989	1 vs 2	0.89684	NS or Estimate < 0.5
ATXN7	0.107309	0.254244	0.422072	0.69467	0.158221	1 vs 2	0.923993	NS or Estimate < 0.5
UBP1	1.07627	0.329096	3.27039	0.0307779	1.51176	1 vs 2	0.356426	P < 0.05
PAK3	0.163951	0.92	0.178208	0.867221	0.0618701	1 vs 2	0.977432	NS or Estimate < 0.5
UGT8	-0.226024	0.963462	-0.234596	0.826042	0.0829979	1 vs 2	0.959809	NS or Estimate < 0.5
SULF1	0.686298	0.529286	1.29665	0.264495	0.577582	1 vs 2	0.708467	NS or Estimate < 0.5
SPRED2	0.497284	0.916847	0.542386	0.616357	0.210167	1 vs 2	0.89684	NS or Estimate < 0.5
WDSUB1	1.07627	0.752633	1.43001	0.22594	0.646007	1 vs 2	0.679905	NS or Estimate < 0.5
VGLL4	0.302297	0.387386	0.78035	0.478782	0.319862	1 vs 2	0.836278	NS or Estimate < 0.5
SLC39A13	-0.226024	0.342112	-0.660672	0.544932	0.263658	1 vs 2	0.867264	NS or Estimate < 0.5
DIS3	0.692272	0.771332	0.897502	0.420188	0.376556	1 vs 2	0.81584	NS or Estimate < 0.5
TPRN	0.497284	0.600328	0.828355	0.454033	0.342913	1 vs 2	0.82588	NS or Estimate < 0.5
LYRM1	0.904749	0.785865	1.15128	0.313753	0.503412	1 vs 2	0.74785	NS or Estimate < 0.5
LACC1	0.604594	0.705596	0.856855	0.439825	0.35672	1 vs 2	0.820093	NS or Estimate < 0.5
TSPAN14	0.692272	0.885419	0.781858	0.477989	0.320582	1 vs 2	0.836278	NS or Estimate < 0.5
MPV17L	0.0566417	0.602709	0.0939784	0.929646	0.0316826	1 vs 2	0.981787	NS or Estimate < 0.5
AP1AR	-0.0310365	0.615495	-0.0504252	0.962201	0.0167341	1 vs 2	0.981787	NS or Estimate < 0.5
MAPKBP1	-4.95913	0.529385	-9.36772	0.000723307	3.14068	1 vs 2	0.0798749	P < 0.05
USP8	0.968964	0.695271	1.39365	0.235865	0.627337	1 vs 2	0.687605	NS or Estimate < 0.5
NUDT22	-1.10517	0.818483	-1.35026	0.248274	0.605069	1 vs 2	0.696283	NS or Estimate < 0.5
ARHGEF3	0.163951	0.563986	0.290701	0.78573	0.104727	1 vs 2	0.957229	NS or Estimate < 0.5
REPS1	0.63563	0.824366	0.771053	0.483694	0.315429	1 vs 2	0.836278	NS or Estimate < 0.5
SPIRE1	-0.36437	0.715185	-0.509476	0.637239	0.195697	1 vs 2	0.905172	NS or Estimate < 0.5
NCS1	0.302297	0.395742	0.763873	0.487514	0.312013	1 vs 2	0.836278	NS or Estimate < 0.5
TOMM40	-0.36437	0.875115	-0.416368	0.698512	0.155826	1 vs 2	0.924091	NS or Estimate < 0.5
ENTPD4	-0.471679	0.256193	-1.84111	0.139419	0.855677	1 vs 2	0.606848	NS or Estimate < 0.5
NAF1	0.830618	1.30536	0.636312	0.559162	0.252462	1 vs 2	0.875929	NS or Estimate < 0.5
SYNPO2	-0.0310365	0.669942	-0.0463271	0.96527	0.0153511	1 vs 2	0.981787	NS or Estimate < 0.5
AEBP1	-1.13835	0.836231	-1.36128	0.245063	0.610723	1 vs 2	0.695376	NS or Estimate < 0.5
NSDHL	-0.276692	0.755056	-0.366452	0.732588	0.13514	1 vs 2	0.943645	NS or Estimate < 0.5
INSYN2B	0.302297	0.695271	0.43479	0.686144	0.163585	1 vs 2	0.922342	NS or Estimate < 0.5
SYTL4	-0.966821	0.793215	-1.21886	0.28986	0.537812	1 vs 2	0.734685	NS or Estimate < 0.5
KRBOX4	-0.697703	0.542052	-1.28715	0.267474	0.572719	1 vs 2	0.711823	NS or Estimate < 0.5
GASK1A	-0.559357	0.471988	-1.18511	0.301572	0.52061	1 vs 2	0.744215	NS or Estimate < 0.5
CLEC12B	0.74294	0.458964	1.61873	0.180817	0.742762	1 vs 2	0.643446	NS or Estimate < 0.5
SLC9A3R2	-0.138346	0.694597	-0.199174	0.851841	0.0696414	1 vs 2	0.969587	NS or Estimate < 0.5
ANKRD33	-0.169382	0.730588	-0.231844	0.828037	0.0819502	1 vs 2	0.959809	NS or Estimate < 0.5
ATP6V0A1	-0.438501	0.542974	-0.80759	0.464612	0.33291	1 vs 2	0.835174	NS or Estimate < 0.5
ZNF562	0.497284	0.829652	0.599389	0.581211	0.235667	1 vs 2	0.882449	NS or Estimate < 0.5
SHC1	0.409606	0.976253	0.41957	0.696354	0.15717	1 vs 2	0.923993	NS or Estimate < 0.5
DOCK9	0.214619	0.858594	0.249965	0.814927	0.0888813	1 vs 2	0.959122	NS or Estimate < 0.5
ATF7	-0.421011	0.855543	-0.492099	0.648434	0.188134	1 vs 2	0.911602	NS or Estimate < 0.5
PLD1	-1.03104	0.69724	-1.47874	0.213292	0.671026	1 vs 2	0.661785	NS or Estimate < 0.5
PLXNB1	-5.43896e-16	0.897062	-6.06308e-16	1	1.92865e-16	1 vs 2	1	NS or Estimate < 0.5
ABHD17A	0.473821	0.872696	0.54294	0.616009	0.210413	1 vs 2	0.89684	NS or Estimate < 0.5
ERAP2	0.107309	0.867566	0.12369	0.907527	0.0421405	1 vs 2	0.981787	NS or Estimate < 0.5
LTBP3	-0.495142	0.744813	-0.664787	0.542554	0.265557	1 vs 2	0.864416	NS or Estimate < 0.5
YAP1	0.797439	0.868804	0.917858	0.410629	0.38655	1 vs 2	0.808836	NS or Estimate < 0.5
MYO1B	-0.966821	0.700602	-1.37999	0.239705	0.620323	1 vs 2	0.688323	NS or Estimate < 0.5
DNAJA4	-0.697703	0.857671	-0.813485	0.461589	0.335745	1 vs 2	0.833047	NS or Estimate < 0.5
ACAA1	-1.78538	0.805919	-2.21534	0.0910836	1.04056	1 vs 2	0.520261	NS or Estimate < 0.5
SMARCC2	1.34539	0.6301	2.1352	0.0996233	1.00164	1 vs 2	0.537641	NS or Estimate < 0.5
C15orf62	-0.0310365	0.835429	-0.0371503	0.972145	0.0122688	1 vs 2	0.981787	NS or Estimate < 0.5
THAP5	0.692272	0.712232	0.971975	0.386102	0.413298	1 vs 2	0.796238	NS or Estimate < 0.5
ERICH4	0.107309	0.499256	0.214939	0.840329	0.0755507	1 vs 2	0.963512	NS or Estimate < 0.5
AP1M1	-1.13835	0.428576	-2.65611	0.0566194	1.24704	1 vs 2	0.44085	NS or Estimate < 0.5
SPAG9	-0.138346	0.966939	-0.143076	0.893148	0.0490765	1 vs 2	0.980925	NS or Estimate < 0.5
EIF4E	0.850249	0.666908	1.27491	0.271361	0.566453	1 vs 2	0.715133	NS or Estimate < 0.5
GUCY1A1	-1.80501	0.405951	-4.44638	0.0112782	1.94776	1 vs 2	0.254691	P < 0.05
HMGB2	-0.226024	0.754997	-0.299371	0.779568	0.108146	1 vs 2	0.956648	NS or Estimate < 0.5
RUFY3	0.861654	0.83025	1.03782	0.357967	0.446156	1 vs 2	0.784724	NS or Estimate < 0.5
AHCYL2	0.830618	0.509537	1.63014	0.178405	0.748593	1 vs 2	0.639907	NS or Estimate < 0.5
IFT22	-0.226024	0.799131	-0.282837	0.791335	0.10164	1 vs 2	0.957995	NS or Estimate < 0.5
RTCA	-0.0817042	1.05932	-0.077129	0.942225	0.0258455	1 vs 2	0.981787	NS or Estimate < 0.5
PITPNM1	-0.36437	0.382448	-0.952731	0.394677	0.403758	1 vs 2	0.798252	NS or Estimate < 0.5
CAB39	1.35894	0.501091	2.71196	0.0534291	1.27222	1 vs 2	0.433083	NS or Estimate < 0.5
CBLC	0.497284	1.01344	0.49069	0.649347	0.187523	1 vs 2	0.91166	NS or Estimate < 0.5
PPIP5K1	2.04309	0.788244	2.59196	0.060559	1.21782	1 vs 2	0.452704	NS or Estimate < 0.5
CLDN5	-1.08768	0.58397	-1.86256	0.135997	0.866471	1 vs 2	0.604741	NS or Estimate < 0.5
PWWP2A	-0.559357	0.90786	-0.616127	0.571144	0.243254	1 vs 2	0.880995	NS or Estimate < 0.5
DMRT2	-0.226024	0.486505	-0.464587	0.666389	0.176273	1 vs 2	0.915741	NS or Estimate < 0.5
SUGT1	-0.0223714	0.565594	-0.0395538	0.970344	0.0130741	1 vs 2	0.981787	NS or Estimate < 0.5
RABL2B	-0.138346	0.386175	-0.358246	0.738265	0.131788	1 vs 2	0.944972	NS or Estimate < 0.5
NEMP1	-0.559357	0.434258	-1.28808	0.267183	0.573192	1 vs 2	0.711823	NS or Estimate < 0.5
SUN1	-0.697703	0.588405	-1.18575	0.301344	0.520937	1 vs 2	0.744215	NS or Estimate < 0.5
ZNF385A	-0.697703	0.618576	-1.12792	0.322427	0.491568	1 vs 2	0.756178	NS or Estimate < 0.5
NSMF	-1.75434	0.554738	-3.16247	0.034103	1.46721	1 vs 2	0.370006	P < 0.05
CRISP1	-0.276692	0.948494	-0.291717	0.785007	0.105127	1 vs 2	0.957229	NS or Estimate < 0.5
TMEM131L	0.830618	0.277447	2.99378	0.0401877	1.39591	1 vs 2	0.386057	P < 0.05
SATB1	-1.63349	0.665755	-2.45359	0.0701739	1.15382	1 vs 2	0.466765	NS or Estimate < 0.5
PEX5	-0.0310365	0.645963	-0.0480468	0.963982	0.015931	1 vs 2	0.981787	NS or Estimate < 0.5
AP3M2	0.0256052	0.521502	0.0490989	0.963194	0.0162861	1 vs 2	0.981787	NS or Estimate < 0.5
PRR22	-1.22602	0.406383	-3.01692	0.0392821	1.40581	1 vs 2	0.386057	P < 0.05
STRIP2	-0.943358	0.913749	-1.0324	0.360213	0.44344	1 vs 2	0.786797	NS or Estimate < 0.5
PSMG3	-3.32813	0.393227	-8.46363	0.00106795	2.97145	1 vs 2	0.101554	P < 0.05
RBM20	-0.892691	0.354367	-2.51912	0.0654183	1.1843	1 vs 2	0.459008	NS or Estimate < 0.5
SLC6A6	-0.0310365	0.629065	-0.0493374	0.963016	0.0163666	1 vs 2	0.981787	NS or Estimate < 0.5
TBC1D5	0.302297	0.601618	0.502473	0.641737	0.192643	1 vs 2	0.907177	NS or Estimate < 0.5
ZDHHC4	-1	0.682667	-1.46484	0.216824	0.663892	1 vs 2	0.664911	NS or Estimate < 0.5
C7orf50	-1.03104	0.790246	-1.3047	0.261994	0.581709	1 vs 2	0.705845	NS or Estimate < 0.5
VAV2	-0.502716	0.883971	-0.568701	0.599968	0.221872	1 vs 2	0.887976	NS or Estimate < 0.5
CDV3	0.163951	0.684662	0.239463	0.822517	0.0848552	1 vs 2	0.959809	NS or Estimate < 0.5
AZI2	0.163951	0.492685	0.33277	0.756017	0.121468	1 vs 2	0.947394	NS or Estimate < 0.5
IQCG	-0.697703	0.523705	-1.33225	0.253614	0.595827	1 vs 2	0.697482	NS or Estimate < 0.5
LSMEM1	-0.502716	0.642107	-0.782915	0.477434	0.321087	1 vs 2	0.836278	NS or Estimate < 0.5
GSE1	1.49728	0.632428	2.36752	0.0770289	1.11335	1 vs 2	0.48355	NS or Estimate < 0.5
LRRC8B	0.302297	0.766791	0.394236	0.713522	0.146593	1 vs 2	0.931075	NS or Estimate < 0.5
LRRC8D	-0.0817042	0.349508	-0.233769	0.826641	0.0826831	1 vs 2	0.959809	NS or Estimate < 0.5
TOMM6	1.56275	0.362416	4.31204	0.0125259	1.90219	1 vs 2	0.268002	P < 0.05
AFAP1	-2.13835	0.138346	-15.4565	0.000102254	3.99032	1 vs 2	0.0348204	FDR < 0.05
ZNF213	0.284808	0.616224	0.462182	0.667972	0.175242	1 vs 2	0.915741	NS or Estimate < 0.5
HOGA1	-0.0310365	0.213309	-0.1455	0.891354	0.04995	1 vs 2	0.980027	NS or Estimate < 0.5
DERL1	-0.0310365	0.817751	-0.0379535	0.971543	0.0125378	1 vs 2	0.981787	NS or Estimate < 0.5
NFIA	1.07627	0.432444	2.48882	0.06757	1.17025	1 vs 2	0.462938	NS or Estimate < 0.5
OST4	0.672641	0.429558	1.56589	0.192433	0.715721	1 vs 2	0.645212	NS or Estimate < 0.5
SARDH	-4.59233	0.472494	-9.71932	0.000627426	3.20244	1 vs 2	0.0758277	P < 0.05
DEK	0.937927	0.523902	1.79027	0.147904	0.83002	1 vs 2	0.609686	NS or Estimate < 0.5
ARFRP1	-0.610025	0.702318	-0.868589	0.434081	0.362429	1 vs 2	0.81584	NS or Estimate < 0.5
KLC2	-0.535894	1.04961	-0.510564	0.636542	0.196173	1 vs 2	0.905172	NS or Estimate < 0.5
HYLS1	-0.0310365	0.75751	-0.0409717	0.969282	0.0135499	1 vs 2	0.981787	NS or Estimate < 0.5
AHI1	0.74294	0.814506	0.912135	0.413298	0.383736	1 vs 2	0.812936	NS or Estimate < 0.5
PPP1R18	-0.36437	0.527322	-0.690982	0.527585	0.277708	1 vs 2	0.857003	NS or Estimate < 0.5
RTL1	0.302297	0.395742	0.763873	0.487514	0.312013	1 vs 2	0.836278	NS or Estimate < 0.5
FERMT2	-0.0114052	0.565457	-0.0201699	0.984874	0.00661941	1 vs 2	0.986892	NS or Estimate < 0.5
ELMOD3	-1.66667	0.747332	-2.23016	0.0895954	1.04771	1 vs 2	0.517832	NS or Estimate < 0.5
JDP2	0.389975	0.861804	0.45251	0.674358	0.17111	1 vs 2	0.915741	NS or Estimate < 0.5
DNAJA3	-0.36437	0.715185	-0.509476	0.637239	0.195697	1 vs 2	0.905172	NS or Estimate < 0.5
CCDC36	0.497284	0.503075	0.98849	0.378871	0.421509	1 vs 2	0.792142	NS or Estimate < 0.5
FKBP6	-0.36437	0.761817	-0.47829	0.657411	0.182163	1 vs 2	0.912997	NS or Estimate < 0.5
TAF12	0.830618	0.335778	2.47371	0.0686727	1.16322	1 vs 2	0.466005	NS or Estimate < 0.5
NDRG1	0.547952	0.675099	0.811662	0.462523	0.334867	1 vs 2	0.834216	NS or Estimate < 0.5
PAX7	-0.892691	0.90786	-0.983291	0.381135	0.418921	1 vs 2	0.79445	NS or Estimate < 0.5
HSF2	0.692272	0.589327	1.17468	0.305278	0.515304	1 vs 2	0.744215	NS or Estimate < 0.5
SMIM13	-0.421011	0.482555	-0.872464	0.432198	0.364317	1 vs 2	0.81584	NS or Estimate < 0.5
C5orf24	-0.754345	0.752457	-1.00251	0.372825	0.428494	1 vs 2	0.792142	NS or Estimate < 0.5
GDAP2	-1.22602	0.444936	-2.75551	0.0510846	1.29171	1 vs 2	0.422414	NS or Estimate < 0.5
CLHC1	-0.502716	0.569757	-0.882333	0.427431	0.369134	1 vs 2	0.81584	NS or Estimate < 0.5
ARHGAP26	-0.226024	0.900638	-0.25096	0.81421	0.0892638	1 vs 2	0.959122	NS or Estimate < 0.5
PIP5K1A	-0.36437	0.47627	-0.765049	0.486887	0.312572	1 vs 2	0.836278	NS or Estimate < 0.5
INPP5K	-1.36437	0.539109	-2.53079	0.0646105	1.1897	1 vs 2	0.459008	NS or Estimate < 0.5
PTPRK	-0.243513	0.437298	-0.556858	0.607309	0.21659	1 vs 2	0.892262	NS or Estimate < 0.5
EIF2AK2	0.440643	0.754997	0.583635	0.590791	0.228566	1 vs 2	0.885239	NS or Estimate < 0.5
PABPC4	1.01963	0.325571	3.13183	0.0351232	1.45441	1 vs 2	0.370006	P < 0.05
MSRA	-0.805012	0.754354	-1.06716	0.346028	0.460888	1 vs 2	0.780377	NS or Estimate < 0.5
ATL2	1.43307	0.898711	1.59458	0.186032	0.730411	1 vs 2	0.645212	NS or Estimate < 0.5
SMIM19	0.74294	0.22466	3.30695	0.0297393	1.52667	1 vs 2	0.354395	P < 0.05
DERL3	-0.0310365	0.777726	-0.0399067	0.97008	0.0131925	1 vs 2	0.981787	NS or Estimate < 0.5
ECD	0.63563	0.383326	1.6582	0.172618	0.762915	1 vs 2	0.639738	NS or Estimate < 0.5
RPN2	0.830618	0.617655	1.34479	0.249884	0.602262	1 vs 2	0.696283	NS or Estimate < 0.5
LRP5L	-0.559357	0.417031	-1.34128	0.250921	0.600463	1 vs 2	0.696283	NS or Estimate < 0.5
ZBTB43	1.88726	0.507324	3.72003	0.020474	1.6888	1 vs 2	0.32193	P < 0.05
FDPS	-1.42101	0.785799	-1.80836	0.144822	0.839164	1 vs 2	0.609195	NS or Estimate < 0.5
RNF185	-0.502716	0.642107	-0.782915	0.477434	0.321087	1 vs 2	0.836278	NS or Estimate < 0.5
POSTN	1.55393	0.526242	2.95287	0.0418497	1.37831	1 vs 2	0.390724	P < 0.05
MYOT	-0.169382	0.730588	-0.231844	0.828037	0.0819502	1 vs 2	0.959809	NS or Estimate < 0.5
GKAP1	-0.0817042	0.89013	-0.091789	0.931279	0.0309203	1 vs 2	0.981787	NS or Estimate < 0.5
TRPC4	-0.697703	0.592958	-1.17665	0.304576	0.516304	1 vs 2	0.744215	NS or Estimate < 0.5
NDUFB11	-0.522347	0.797998	-0.654572	0.548472	0.260846	1 vs 2	0.870604	NS or Estimate < 0.5
ABL2	-0.836049	0.652219	-1.28185	0.26915	0.570006	1 vs 2	0.712596	NS or Estimate < 0.5
C2CD4D	-0.36437	0.373795	-0.974786	0.384863	0.414694	1 vs 2	0.79512	NS or Estimate < 0.5
NFATC4	-0.36437	0.636159	-0.572765	0.597462	0.22369	1 vs 2	0.886183	NS or Estimate < 0.5
PUF60	-2.30613	0.814185	-2.83244	0.0472281	1.3258	1 vs 2	0.412424	P < 0.05
TRMT1	0.547952	0.791101	0.692645	0.526644	0.278483	1 vs 2	0.857003	NS or Estimate < 0.5
ZNF692	0.699845	0.630275	1.11038	0.329084	0.482693	1 vs 2	0.761472	NS or Estimate < 0.5
LIMS2	-0.754345	0.977256	-0.771901	0.483244	0.315833	1 vs 2	0.836278	NS or Estimate < 0.5
ZNF415	0.63563	0.786095	0.808592	0.464097	0.333391	1 vs 2	0.835174	NS or Estimate < 0.5
LRIG3	-0.697703	1.00921	-0.691338	0.527383	0.277874	1 vs 2	0.857003	NS or Estimate < 0.5
COLCA2	0.968964	0.866372	1.11841	0.32602	0.486756	1 vs 2	0.758117	NS or Estimate < 0.5
BEAN1	-0.748371	0.563155	-1.32889	0.25462	0.594107	1 vs 2	0.697482	NS or Estimate < 0.5
R3HCC1	-0.331191	0.491955	-0.673215	0.537705	0.269456	1 vs 2	0.858896	NS or Estimate < 0.5
FBXO28	-0.666667	0.579899	-1.14963	0.314359	0.502574	1 vs 2	0.74785	NS or Estimate < 0.5
SLF2	0.302297	0.766791	0.394236	0.713522	0.146593	1 vs 2	0.931075	NS or Estimate < 0.5
ALG1L2	-0.892691	0.523902	-1.70393	0.163601	0.786215	1 vs 2	0.634465	NS or Estimate < 0.5
OTUD5	1.57142	0.653004	2.40644	0.073839	1.13171	1 vs 2	0.475738	NS or Estimate < 0.5
HSBP1L1	0.830618	0.509537	1.63014	0.178405	0.748593	1 vs 2	0.639907	NS or Estimate < 0.5
LAX1	0.63563	0.732321	0.867967	0.434384	0.362126	1 vs 2	0.81584	NS or Estimate < 0.5
FZR1	-0.169382	0.836822	-0.202411	0.849473	0.0708502	1 vs 2	0.969587	NS or Estimate < 0.5
GRAMD1A	0.302297	0.408604	0.739828	0.500473	0.30062	1 vs 2	0.841909	NS or Estimate < 0.5
BORCS7	-0.421011	0.390313	-1.07865	0.341447	0.466676	1 vs 2	0.777065	NS or Estimate < 0.5
RCOR3	1.02561	0.46617	2.20007	0.0926456	1.03318	1 vs 2	0.524515	NS or Estimate < 0.5
ATXN7L3B	-0.771834	0.640259	-1.2055	0.294444	0.530997	1 vs 2	0.741075	NS or Estimate < 0.5
IFFO2	-0.697703	0.601618	-1.15971	0.310675	0.507694	1 vs 2	0.74785	NS or Estimate < 0.5
DAZAP2	2.09974	0.776047	2.70568	0.053777	1.2694	1 vs 2	0.433792	NS or Estimate < 0.5
AKIRIN1	-0.169382	0.904392	-0.187289	0.860551	0.0652235	1 vs 2	0.973225	NS or Estimate < 0.5
ANP32E	0.497284	0.669381	0.742901	0.498802	0.302072	1 vs 2	0.840751	NS or Estimate < 0.5
C19orf38	0.302297	0.492475	0.613832	0.572518	0.242211	1 vs 2	0.880995	NS or Estimate < 0.5
C1orf198	-0.754345	0.419782	-1.79699	0.146752	0.833417	1 vs 2	0.609195	NS or Estimate < 0.5
BTF3L4	1.40961	0.302349	4.66218	0.009574	2.01891	1 vs 2	0.239727	P < 0.05
ZNF841	0.830618	0.503761	1.64883	0.174527	0.758138	1 vs 2	0.639907	NS or Estimate < 0.5
ZNF844	-0.559357	0.726291	-0.770155	0.48417	0.315002	1 vs 2	0.836278	NS or Estimate < 0.5
SYT2	-1.07413	0.941319	-1.14109	0.317509	0.498244	1 vs 2	0.752554	NS or Estimate < 0.5
BTBD19	0.163951	0.492685	0.33277	0.756017	0.121468	1 vs 2	0.947394	NS or Estimate < 0.5
ACAD10	0.358939	0.501091	0.716313	0.513393	0.28955	1 vs 2	0.852396	NS or Estimate < 0.5
TLK1	0.358939	0.914361	0.392557	0.714667	0.145896	1 vs 2	0.931075	NS or Estimate < 0.5
ZAR1L	-1.4385	0.747158	-1.9253	0.126498	0.897917	1 vs 2	0.58952	NS or Estimate < 0.5
LRRFIP1	1.04309	0.63152	1.65172	0.173936	0.759611	1 vs 2	0.639907	NS or Estimate < 0.5
TMEM151B	-1.55936	0.501582	-3.10888	0.0359109	1.44477	1 vs 2	0.371304	P < 0.05
ILF3	1.34539	0.502199	2.679	0.0552859	1.25739	1 vs 2	0.436833	NS or Estimate < 0.5
ATXN1L	0.433069	0.890843	0.486135	0.652303	0.185551	1 vs 2	0.912997	NS or Estimate < 0.5
SVOPL	0.0196312	0.474862	0.0413409	0.969005	0.0136738	1 vs 2	0.981787	NS or Estimate < 0.5
BCAP31	1.55393	0.955876	1.62566	0.179349	0.746301	1 vs 2	0.640845	NS or Estimate < 0.5
CNST	0.830618	0.588427	1.41159	0.230915	0.636548	1 vs 2	0.679905	NS or Estimate < 0.5
ALOX15	-1.22602	0.683699	-1.79322	0.147397	0.831513	1 vs 2	0.609195	NS or Estimate < 0.5
ATP13A2	0.107309	0.702212	0.152816	0.885942	0.0525947	1 vs 2	0.980027	NS or Estimate < 0.5
TP53BP1	0.520747	0.149469	3.48398	0.0252605	1.59756	1 vs 2	0.334311	P < 0.05
NIPA1	1.60459	0.437912	3.66419	0.0215008	1.66755	1 vs 2	0.32193	P < 0.05
RNASEH2B	0.63563	0.827607	0.768034	0.485297	0.313992	1 vs 2	0.836278	NS or Estimate < 0.5
SEMA4D	0.389975	0.546134	0.714065	0.514642	0.288495	1 vs 2	0.852396	NS or Estimate < 0.5
EMC8	-0.169382	0.589327	-0.287417	0.788069	0.103436	1 vs 2	0.957353	NS or Estimate < 0.5
MGRN1	0.27126	0.842462	0.321985	0.763589	0.11714	1 vs 2	0.95159	NS or Estimate < 0.5
ARFGAP3	0.547952	0.506922	1.08094	0.340541	0.46783	1 vs 2	0.776309	NS or Estimate < 0.5
SPART	-0.559357	0.232011	-2.41091	0.0734826	1.13382	1 vs 2	0.474633	NS or Estimate < 0.5
TMEM169	-0.0310365	0.747647	-0.0415122	0.968877	0.0137313	1 vs 2	0.981787	NS or Estimate < 0.5
DMTF1	1.27126	0.540863	2.35043	0.0784784	1.10525	1 vs 2	0.486993	NS or Estimate < 0.5
THOC6	1.3023	0.504614	2.58078	0.0612771	1.2127	1 vs 2	0.453837	NS or Estimate < 0.5
NEDD9	-0.666667	0.942809	-0.707107	0.518519	0.285236	1 vs 2	0.853378	NS or Estimate < 0.5
CTIF	0.63563	0.478356	1.32878	0.254653	0.594051	1 vs 2	0.697482	NS or Estimate < 0.5
MORF4L2	0.709761	0.755384	0.939603	0.40062	0.397268	1 vs 2	0.80343	NS or Estimate < 0.5
EDC3	-1.10517	0.312183	-3.54012	0.0240108	1.61959	1 vs 2	0.323563	P < 0.05
HES4	-0.0310365	0.982324	-0.0315949	0.976309	0.0104128	1 vs 2	0.981787	NS or Estimate < 0.5
BMERB1	1.40874	0.247943	5.68172	0.00473668	2.32453	1 vs 2	0.195736	P < 0.05
INTS12	0.214619	0.858594	0.249965	0.814927	0.0888813	1 vs 2	0.959122	NS or Estimate < 0.5
NREP	1.40961	0.489558	2.87935	0.0450427	1.34638	1 vs 2	0.402952	P < 0.05
FLYWCH2	0.107309	0.479517	0.223787	0.833889	0.078892	1 vs 2	0.962251	NS or Estimate < 0.5
SLC35B3	-0.697703	0.593525	-1.17552	0.304977	0.515732	1 vs 2	0.744215	NS or Estimate < 0.5
CPSF7	-1.22602	0.499256	-2.4557	0.0700142	1.15481	1 vs 2	0.466005	NS or Estimate < 0.5
BBX	-0.697703	0.845477	-0.825218	0.455618	0.341399	1 vs 2	0.825984	NS or Estimate < 0.5
ZNF780A	0.163951	0.563986	0.290701	0.78573	0.104727	1 vs 2	0.957229	NS or Estimate < 0.5
NFYC	1.02561	0.429286	2.3891	0.0752416	1.12354	1 vs 2	0.47788	NS or Estimate < 0.5
ITPK1	-0.892691	0.760628	-1.17362	0.305657	0.514765	1 vs 2	0.744215	NS or Estimate < 0.5
EFTUD2	0.302297	0.387386	0.78035	0.478782	0.319862	1 vs 2	0.836278	NS or Estimate < 0.5
TGFBRAP1	-0.559357	0.555181	-1.00752	0.370684	0.430996	1 vs 2	0.792142	NS or Estimate < 0.5
PIK3R5	1.35894	0.289	4.70222	0.00929313	2.03184	1 vs 2	0.237199	P < 0.05
TNRC6C	-0.892691	0.354695	-2.51679	0.0655809	1.18322	1 vs 2	0.459008	NS or Estimate < 0.5
HNRNPLL	0.904749	0.592832	1.52615	0.201674	0.69535	1 vs 2	0.65587	NS or Estimate < 0.5
PTGES3L	-0.0310365	0.387386	-0.0801176	0.939992	0.0268759	1 vs 2	0.981787	NS or Estimate < 0.5
ATG13	-0.502716	0.642107	-0.782915	0.477434	0.321087	1 vs 2	0.836278	NS or Estimate < 0.5
CHID1	0.63563	0.955876	0.664972	0.542447	0.265642	1 vs 2	0.864381	NS or Estimate < 0.5
ARHGAP32	1.07627	0.820832	1.3112	0.259994	0.585036	1 vs 2	0.702114	NS or Estimate < 0.5
FAM111B	-1.33333	0.832832	-1.60096	0.18464	0.733675	1 vs 2	0.645212	NS or Estimate < 0.5
ERI2	0.497284	0.600328	0.828355	0.454033	0.342913	1 vs 2	0.82588	NS or Estimate < 0.5
HSD3B7	-0.892691	0.63912	-1.39675	0.235002	0.628929	1 vs 2	0.687205	NS or Estimate < 0.5
C17orf49	-0.118715	0.683268	-0.173745	0.870504	0.0602292	1 vs 2	0.978566	NS or Estimate < 0.5
SLC6A8	-1.42101	0.714552	-1.98868	0.117629	0.929487	1 vs 2	0.574247	NS or Estimate < 0.5
PIEZO1	-1.22602	0.543076	-2.25755	0.0869154	1.0609	1 vs 2	0.513296	NS or Estimate < 0.5
API5	-0.105167	1.04398	-0.100737	0.924606	0.0340431	1 vs 2	0.981787	NS or Estimate < 0.5
AMIGO2	-0.559357	0.91042	-0.614395	0.572181	0.242467	1 vs 2	0.880995	NS or Estimate < 0.5
MPC2	-0.0952515	0.637511	-0.149411	0.88846	0.0513623	1 vs 2	0.980027	NS or Estimate < 0.5
FAM13C	-0.0310365	0.507324	-0.0611768	0.954153	0.0203819	1 vs 2	0.981787	NS or Estimate < 0.5
CTDNEP1	1.67872	0.426722	3.934	0.0170456	1.76839	1 vs 2	0.288875	P < 0.05
SLC25A39	-0.0310365	0.300108	-0.103418	0.922609	0.0349823	1 vs 2	0.981787	NS or Estimate < 0.5
TPCN1	0.163951	0.556367	0.294681	0.782898	0.106295	1 vs 2	0.957229	NS or Estimate < 0.5
MAPRE2	-0.559357	0.750513	-0.7453	0.497501	0.303206	1 vs 2	0.840244	NS or Estimate < 0.5
HRH4	-0.36437	0.85515	-0.426089	0.691971	0.159912	1 vs 2	0.923407	NS or Estimate < 0.5
CCDC68	0.163951	0.801797	0.20448	0.847962	0.0716237	1 vs 2	0.969066	NS or Estimate < 0.5
LEUTX	-0.36437	0.539996	-0.674763	0.536818	0.270173	1 vs 2	0.857806	NS or Estimate < 0.5
NOX4	0.63563	0.692531	0.917836	0.41064	0.386539	1 vs 2	0.808836	NS or Estimate < 0.5
TCTN2	-1.47168	0.639432	-2.30154	0.0827987	1.08198	1 vs 2	0.501919	NS or Estimate < 0.5
TCHP	-0.559357	0.694508	-0.8054	0.465739	0.331857	1 vs 2	0.835191	NS or Estimate < 0.5
RPH3A	-0.0310365	0.339837	-0.0913275	0.931623	0.0307597	1 vs 2	0.981787	NS or Estimate < 0.5
BSDC1	0.183582	0.863311	0.212649	0.841998	0.0746889	1 vs 2	0.964883	NS or Estimate < 0.5
TMEM30A	-2.2844	0.141308	-16.1661	8.56513e-05	4.06727	1 vs 2	0.0348204	FDR < 0.05
CAPN8	-0.754345	0.482555	-1.56323	0.193037	0.714359	1 vs 2	0.645212	NS or Estimate < 0.5
TBC1D7	-0.754345	0.482555	-1.56323	0.193037	0.714359	1 vs 2	0.645212	NS or Estimate < 0.5
UBTFL1	0.214619	0.858594	0.249965	0.814927	0.0888813	1 vs 2	0.959122	NS or Estimate < 0.5
NDE1	-0.0310365	0.816263	-0.0380226	0.971492	0.0125609	1 vs 2	0.981787	NS or Estimate < 0.5
BANF1	0.783892	0.212889	3.68216	0.0211637	1.67441	1 vs 2	0.32193	P < 0.05
TLE6	-1.90261	0.354535	-5.36649	0.00582097	2.235	1 vs 2	0.213222	P < 0.05
NBPF6	0.63563	0.824366	0.771053	0.483694	0.315429	1 vs 2	0.836278	NS or Estimate < 0.5
WRAP53	0.163951	1.00832	0.162598	0.878719	0.0561501	1 vs 2	0.980027	NS or Estimate < 0.5
AMFR	0.389975	0.995927	0.39157	0.715341	0.145487	1 vs 2	0.931075	NS or Estimate < 0.5
TMX2	-0.0310365	0.490396	-0.0632886	0.952573	0.0211017	1 vs 2	0.981787	NS or Estimate < 0.5
NHSL1	-0.805012	0.580605	-1.38651	0.237865	0.62367	1 vs 2	0.688323	NS or Estimate < 0.5
COPB1	1.57142	0.935421	1.6799	0.168274	0.773982	1 vs 2	0.637636	NS or Estimate < 0.5
ABCC3	-1.03104	0.364937	-2.82525	0.0475739	1.32263	1 vs 2	0.412424	P < 0.05
LDHAL6A	-1.33333	0.614285	-2.17055	0.0957516	1.01885	1 vs 2	0.528141	NS or Estimate < 0.5
DET1	-0.0310365	0.526242	-0.0589775	0.955799	0.0196335	1 vs 2	0.981787	NS or Estimate < 0.5
PHLDB1	0.773976	0.579547	1.33548	0.252646	0.597488	1 vs 2	0.697482	NS or Estimate < 0.5
TLE2	-0.226024	0.499256	-0.452722	0.674217	0.1712	1 vs 2	0.915741	NS or Estimate < 0.5
DENND4A	-0.697703	0.169149	-4.12478	0.0145556	1.83697	1 vs 2	0.26978	P < 0.05
VSTM5	-0.697703	0.638978	-1.0919	0.336233	0.47336	1 vs 2	0.771266	NS or Estimate < 0.5
DOK3	-1.76426	0.407642	-4.32796	0.0123695	1.90765	1 vs 2	0.266321	P < 0.05
IMPA1	-0.471679	0.428576	-1.10057	0.332861	0.477736	1 vs 2	0.766649	NS or Estimate < 0.5
MBIP	1.07627	0.583466	1.84462	0.138853	0.857446	1 vs 2	0.605507	NS or Estimate < 0.5
MIEF2	1.69227	0.509537	3.3212	0.0293457	1.53246	1 vs 2	0.353277	P < 0.05
NKIRAS2	-0.892691	0.623325	-1.43214	0.225371	0.647102	1 vs 2	0.679905	NS or Estimate < 0.5
MYL12B	1.16097	0.71652	1.62029	0.180485	0.74356	1 vs 2	0.643446	NS or Estimate < 0.5
MTHFD2L	-0.805012	0.763792	-1.05397	0.351351	0.454258	1 vs 2	0.781373	NS or Estimate < 0.5
CCDC169	-0.697703	0.699148	-0.997934	0.374789	0.426213	1 vs 2	0.792142	NS or Estimate < 0.5
ANG	0.302297	0.592958	0.509812	0.637025	0.195844	1 vs 2	0.905172	NS or Estimate < 0.5
MUC7	-1.08768	0.348924	-3.11724	0.0356216	1.44829	1 vs 2	0.370006	P < 0.05
BTN3A1	-0.169382	0.379109	-0.446791	0.67815	0.168674	1 vs 2	0.919783	NS or Estimate < 0.5
SCRN2	0.547952	0.872	0.628385	0.563847	0.248839	1 vs 2	0.878578	NS or Estimate < 0.5
PLET1	-0.697703	0.91453	-0.762909	0.488029	0.311555	1 vs 2	0.836575	NS or Estimate < 0.5
PTPRQ	-1.08768	0.513279	-2.11908	0.101447	0.993759	1 vs 2	0.542921	NS or Estimate < 0.5
IQCF5	-0.36437	0.60477	-0.602493	0.579335	0.23707	1 vs 2	0.882449	NS or Estimate < 0.5
COG6	0.692272	0.563986	1.22746	0.286946	0.5422	1 vs 2	0.731612	NS or Estimate < 0.5
ZNF619	-0.471679	0.570297	-0.827077	0.454678	0.342296	1 vs 2	0.825883	NS or Estimate < 0.5
RRP12	0.302297	0.768577	0.39332	0.714146	0.146213	1 vs 2	0.931075	NS or Estimate < 0.5
CAPN14	-0.421011	0.539732	-0.780037	0.478947	0.319713	1 vs 2	0.836278	NS or Estimate < 0.5
SLC1A5	-0.0310365	0.802378	-0.0386806	0.970999	0.0127814	1 vs 2	0.981787	NS or Estimate < 0.5
CRHR1	-1.98782	0.229159	-8.67444	0.000971973	3.01235	1 vs 2	0.0969143	P < 0.05
UBE2QL1	-0.754345	0.772521	-0.976471	0.384122	0.415531	1 vs 2	0.79512	NS or Estimate < 0.5
FAM200B	0.74294	0.638978	1.1627	0.30959	0.509213	1 vs 2	0.74785	NS or Estimate < 0.5
KIAA1671	-0.118715	0.730362	-0.162542	0.87876	0.0561298	1 vs 2	0.980027	NS or Estimate < 0.5
ANKRD65	-0.697703	0.666536	-1.04676	0.354292	0.450639	1 vs 2	0.783453	NS or Estimate < 0.5
SLCO2B1	-0.559357	0.633144	-0.88346	0.426889	0.369685	1 vs 2	0.81584	NS or Estimate < 0.5
SP9	-2.55936	0.0770032	-33.237	4.88705e-06	5.31095	1 vs 2	0.0125475	FDR < 0.05
LAMTOR2	-0.0876781	0.241032	-0.363761	0.734448	0.134039	1 vs 2	0.944758	NS or Estimate < 0.5
FAM185A	-1	0.740081	-1.3512	0.247998	0.605552	1 vs 2	0.696283	NS or Estimate < 0.5
NGLY1	0.63563	0.610156	1.04175	0.356348	0.448125	1 vs 2	0.783453	NS or Estimate < 0.5
EXOC7	-0.105167	0.993452	-0.10586	0.920789	0.0358396	1 vs 2	0.981787	NS or Estimate < 0.5
IQCN	0.302297	0.704932	0.428831	0.690132	0.161068	1 vs 2	0.923324	NS or Estimate < 0.5
ETV3	-0.606045	0.418358	-1.44863	0.221021	0.655567	1 vs 2	0.672957	NS or Estimate < 0.5
UBE2Q2	0.163951	0.527739	0.310667	0.771569	0.112625	1 vs 2	0.955622	NS or Estimate < 0.5
MDM2	-1.616	0.387386	-4.17155	0.0140137	1.85345	1 vs 2	0.26978	P < 0.05
ZNF566	-0.697703	0.169149	-4.12478	0.0145556	1.83697	1 vs 2	0.26978	P < 0.05
ZNF576	0.692272	0.836822	0.827263	0.454584	0.342386	1 vs 2	0.825883	NS or Estimate < 0.5
IPP	0.830618	0.719458	1.1545	0.312572	0.505051	1 vs 2	0.74785	NS or Estimate < 0.5
ELF1	-0.226024	0.647563	-0.349038	0.74466	0.128042	1 vs 2	0.944972	NS or Estimate < 0.5
MKLN1	1.05664	1.11899	0.944278	0.398495	0.399577	1 vs 2	0.802063	NS or Estimate < 0.5
PTPN3	0.352965	0.931944	0.37874	0.724126	0.140186	1 vs 2	0.937448	NS or Estimate < 0.5
TSEN2	-0.666667	0.865274	-0.770469	0.484004	0.315151	1 vs 2	0.836278	NS or Estimate < 0.5
CCDC110	-1.47168	0.605442	-2.43075	0.0719227	1.14313	1 vs 2	0.472489	NS or Estimate < 0.5
TMEM205	0.440643	0.65204	0.675791	0.536229	0.27065	1 vs 2	0.857806	NS or Estimate < 0.5
MSL2	0.440643	0.888946	0.495691	0.646111	0.189693	1 vs 2	0.910602	NS or Estimate < 0.5
TTC28	-0.36437	0.197375	-1.84608	0.138618	0.85818	1 vs 2	0.605507	NS or Estimate < 0.5
NR1D2	-0.697703	0.592958	-1.17665	0.304576	0.516304	1 vs 2	0.744215	NS or Estimate < 0.5
ZNF880	0.302297	0.414106	0.729998	0.505844	0.295983	1 vs 2	0.84706	NS or Estimate < 0.5
SCAF4	0.107309	0.566388	0.189463	0.858956	0.0660292	1 vs 2	0.972057	NS or Estimate < 0.5
ZNF200	-1.33333	0.614285	-2.17055	0.0957516	1.01885	1 vs 2	0.528141	NS or Estimate < 0.5
SCRN1	0.830618	0.429286	1.93488	0.125111	0.902704	1 vs 2	0.58952	NS or Estimate < 0.5
YPEL3	0.0566417	0.410208	0.13808	0.896849	0.0472806	1 vs 2	0.981357	NS or Estimate < 0.5
ZSCAN18	-0.754345	0.482555	-1.56323	0.193037	0.714359	1 vs 2	0.645212	NS or Estimate < 0.5
TRIM45	-0.943358	0.747158	-1.26259	0.275327	0.560152	1 vs 2	0.718031	NS or Estimate < 0.5
APH1B	-1.22602	0.849079	-1.44395	0.222248	0.653162	1 vs 2	0.675373	NS or Estimate < 0.5
ZNF529	0.604594	0.449524	1.34496	0.249833	0.60235	1 vs 2	0.696283	NS or Estimate < 0.5
CTAGE9	-0.805012	0.796421	-1.01079	0.369294	0.432627	1 vs 2	0.792142	NS or Estimate < 0.5
RFX8	-0.36437	0.209642	-1.73806	0.157194	0.803564	1 vs 2	0.626945	NS or Estimate < 0.5
GLG1	1.02561	0.277447	3.69658	0.020898	1.6799	1 vs 2	0.32193	P < 0.05
SORBS2	0.723308	0.752728	0.960915	0.39101	0.407812	1 vs 2	0.798252	NS or Estimate < 0.5
NUPR2	0.77995	0.78773	0.990124	0.378162	0.422322	1 vs 2	0.792142	NS or Estimate < 0.5
CT47B1	-2.84763	0.282213	-10.0904	0.000542763	3.26539	1 vs 2	0.0716004	P < 0.05
FKBP5	-0.559357	1.00105	-0.55877	0.60612	0.217441	1 vs 2	0.891174	NS or Estimate < 0.5
BORCS8	-0.0310365	0.387386	-0.0801176	0.939992	0.0268759	1 vs 2	0.981787	NS or Estimate < 0.5
SH2B1	-1.33333	0.728883	-1.82928	0.141345	0.849719	1 vs 2	0.609195	NS or Estimate < 0.5
MTFR1	0.163951	0.607246	0.269991	0.800524	0.0966256	1 vs 2	0.959122	NS or Estimate < 0.5
SCAPER	-0.169382	0.674252	-0.251215	0.814025	0.0893621	1 vs 2	0.959122	NS or Estimate < 0.5
SLC13A2	-0.226024	0.54531	-0.414487	0.699781	0.155038	1 vs 2	0.925174	NS or Estimate < 0.5
TJAP1	-0.559357	0.371679	-1.50495	0.206787	0.684476	1 vs 2	0.65587	NS or Estimate < 0.5
GORAB	-0.0310365	1.09105	-0.0284464	0.978669	0.00936427	1 vs 2	0.982493	NS or Estimate < 0.5
GLRA1	-2.40746	0.233094	-10.3283	0.000495874	3.30463	1 vs 2	0.0716004	P < 0.05
HSDL1	-0.559357	0.566388	-0.987586	0.379264	0.421059	1 vs 2	0.792157	NS or Estimate < 0.5
CLDN14	-1.36437	0.851619	-1.60209	0.184395	0.734251	1 vs 2	0.645212	NS or Estimate < 0.5
FAN1	0.358939	0.745117	0.481721	0.655174	0.183643	1 vs 2	0.912997	NS or Estimate < 0.5
PTGR1	1.07627	0.783041	1.37448	0.24127	0.617496	1 vs 2	0.688482	NS or Estimate < 0.5
FAM25A	-0.697703	0.523705	-1.33225	0.253614	0.595827	1 vs 2	0.697482	NS or Estimate < 0.5
TRIM77	-1.22602	0.620016	-1.97741	0.119155	0.923889	1 vs 2	0.574247	NS or Estimate < 0.5
ZNF407	0.214619	0.858594	0.249965	0.814927	0.0888813	1 vs 2	0.959122	NS or Estimate < 0.5
PIP4K2C	-0.118715	0.747547	-0.158806	0.881518	0.0547691	1 vs 2	0.980027	NS or Estimate < 0.5
GPR85	-0.226024	0.579547	-0.390001	0.716412	0.144837	1 vs 2	0.931075	NS or Estimate < 0.5
TCF7L2	1.78877	0.645866	2.76957	0.050353	1.29797	1 vs 2	0.421455	NS or Estimate < 0.5
SRP54	0.692272	0.672427	1.02951	0.361417	0.441992	1 vs 2	0.788487	NS or Estimate < 0.5
P3H1	-0.36437	0.636159	-0.572765	0.597462	0.22369	1 vs 2	0.886183	NS or Estimate < 0.5
MYOCD	-0.36437	0.539996	-0.674763	0.536818	0.270173	1 vs 2	0.857806	NS or Estimate < 0.5
SPSB2	-0.169382	0.743902	-0.227695	0.831049	0.0803734	1 vs 2	0.96081	NS or Estimate < 0.5
GRAMD2B	1.32576	0.707212	1.87463	0.134111	0.872534	1 vs 2	0.602768	NS or Estimate < 0.5
TMEM88B	-0.610025	0.663414	-0.919524	0.409855	0.38737	1 vs 2	0.808836	NS or Estimate < 0.5
KDM4C	0.389975	0.494278	0.788979	0.474258	0.323985	1 vs 2	0.836278	NS or Estimate < 0.5
RBM19	-0.169382	0.674252	-0.251215	0.814025	0.0893621	1 vs 2	0.959122	NS or Estimate < 0.5
ANK3	0.74294	0.544176	1.36526	0.243914	0.612762	1 vs 2	0.69333	NS or Estimate < 0.5
ANPEP	-0.22005	0.719987	-0.30563	0.775131	0.110625	1 vs 2	0.955711	NS or Estimate < 0.5
ANXA4	-0.0310365	0.833322	-0.0372443	0.972075	0.0123003	1 vs 2	0.981787	NS or Estimate < 0.5
ANXA5	1.77995	0.789785	2.25372	0.0872853	1.05906	1 vs 2	0.514297	NS or Estimate < 0.5
SEPTIN12	-1.36437	0.395742	-3.44762	0.0261111	1.58318	1 vs 2	0.339915	P < 0.05
ANXA6	0.988595	1.06139	0.93142	0.404362	0.393229	1 vs 2	0.808244	NS or Estimate < 0.5
ANXA7	0.163951	0.826669	0.198327	0.852461	0.0693255	1 vs 2	0.969587	NS or Estimate < 0.5
ZNF716	-1.33333	0.614285	-2.17055	0.0957516	1.01885	1 vs 2	0.528141	NS or Estimate < 0.5
MTHFSD	0.302297	0.593525	0.509324	0.637337	0.195631	1 vs 2	0.905172	NS or Estimate < 0.5
ZNF727	0.302297	0.907475	0.333119	0.755774	0.121608	1 vs 2	0.947394	NS or Estimate < 0.5
BIVM	-0.226024	0.706032	-0.320133	0.764892	0.1164	1 vs 2	0.952028	NS or Estimate < 0.5
SH3YL1	-2.42101	0.534339	-4.53085	0.0105705	1.97591	1 vs 2	0.246711	P < 0.05
MCTP2	-0.421011	0.645642	-0.652081	0.549921	0.259699	1 vs 2	0.870726	NS or Estimate < 0.5
SYNCRIP	1.23808	0.640989	1.93152	0.125596	0.901025	1 vs 2	0.58952	NS or Estimate < 0.5
BUD13	-0.697703	0.823644	-0.847093	0.444651	0.351981	1 vs 2	0.825183	NS or Estimate < 0.5
CANT1	1.3023	0.48905	2.66291	0.0562194	1.25011	1 vs 2	0.439755	NS or Estimate < 0.5
EVI5L	-1.03104	0.52108	-1.97865	0.118985	0.924508	1 vs 2	0.574247	NS or Estimate < 0.5
EPS15	0.130772	1.00496	0.130127	0.902748	0.0444336	1 vs 2	0.981787	NS or Estimate < 0.5
CLDN10	-0.0310365	0.747647	-0.0415122	0.968877	0.0137313	1 vs 2	0.981787	NS or Estimate < 0.5
C15orf40	0.830618	0.75201	1.10453	0.331333	0.479735	1 vs 2	0.763643	NS or Estimate < 0.5
MGAT4A	0.63563	0.197375	3.22042	0.0322677	1.49123	1 vs 2	0.360206	P < 0.05
SLC25A13	0.887259	0.523705	1.6942	0.165476	0.781264	1 vs 2	0.634688	NS or Estimate < 0.5
RNF170	0.497284	0.258131	1.92648	0.126326	0.898508	1 vs 2	0.58952	NS or Estimate < 0.5
SPG11	1.57142	0.861268	1.82454	0.142126	0.847326	1 vs 2	0.609195	NS or Estimate < 0.5
SETD6	-0.421011	0.584789	-0.719937	0.511387	0.291251	1 vs 2	0.851541	NS or Estimate < 0.5
TRAPPC9	0.988595	0.78138	1.26519	0.274486	0.56148	1 vs 2	0.717296	NS or Estimate < 0.5
POLR3B	1.51692	0.445524	3.40479	0.0271572	1.56611	1 vs 2	0.347762	P < 0.05
NPTN	0.74294	0.458964	1.61873	0.180817	0.742762	1 vs 2	0.643446	NS or Estimate < 0.5
CYB561A3	-0.559357	0.417031	-1.34128	0.250921	0.600463	1 vs 2	0.696283	NS or Estimate < 0.5
JMJD4	0.0196312	0.437912	0.0448292	0.966392	0.0148466	1 vs 2	0.981787	NS or Estimate < 0.5
PLEKHD1	-0.559357	0.771315	-0.7252	0.508482	0.293725	1 vs 2	0.849123	NS or Estimate < 0.5
MAFF	0.497284	0.706215	0.704155	0.52017	0.283855	1 vs 2	0.853378	NS or Estimate < 0.5
SAMD4A	-0.805012	0.763792	-1.05397	0.351351	0.454258	1 vs 2	0.781373	NS or Estimate < 0.5
DUS3L	0.497284	0.503075	0.98849	0.378871	0.421509	1 vs 2	0.792142	NS or Estimate < 0.5
KDM4E	-1.66667	0.333333	-5	0.00749043	2.12549	1 vs 2	0.224932	P < 0.05
WWC1	1.23808	1.19874	1.03282	0.360041	0.443648	1 vs 2	0.786797	NS or Estimate < 0.5
FXN	0.692272	0.558826	1.2388	0.283148	0.547987	1 vs 2	0.728803	NS or Estimate < 0.5
AHCY	0.602452	0.759932	0.79277	0.47228	0.3258	1 vs 2	0.836278	NS or Estimate < 0.5
SPATA48	-0.0310365	0.898121	-0.0345571	0.974089	0.0114015	1 vs 2	0.981787	NS or Estimate < 0.5
PDCD6IP	0.302297	0.998437	0.30277	0.777157	0.109491	1 vs 2	0.956648	NS or Estimate < 0.5
SH3D21	-2.28267	0.597153	-3.82258	0.0187368	1.7273	1 vs 2	0.309368	P < 0.05
KIAA0040	0.547952	0.517701	1.05843	0.349541	0.456502	1 vs 2	0.780557	NS or Estimate < 0.5
PLXNB3	0.163951	0.563986	0.290701	0.78573	0.104727	1 vs 2	0.957229	NS or Estimate < 0.5
PCYT1B	-0.697703	0.408604	-1.70753	0.162912	0.788048	1 vs 2	0.634465	NS or Estimate < 0.5
FBXL17	-0.307728	0.258131	-1.19214	0.299096	0.524189	1 vs 2	0.744215	NS or Estimate < 0.5
CCDC120	1.27126	0.717464	1.77188	0.151108	0.820713	1 vs 2	0.615336	NS or Estimate < 0.5
RAB2B	-1.42101	0.299287	-4.74799	0.00898415	2.04652	1 vs 2	0.237199	P < 0.05
FAM172A	-0.892691	0.656862	-1.35902	0.245717	0.609564	1 vs 2	0.695376	NS or Estimate < 0.5
ZNF580	-1.50272	0.720841	-2.08467	0.105464	0.976895	1 vs 2	0.551469	NS or Estimate < 0.5
TWNK	-0.0310365	0.527322	-0.0588568	0.955889	0.0195924	1 vs 2	0.981787	NS or Estimate < 0.5
VSIG10L	-0.502716	0.874795	-0.574667	0.596291	0.224542	1 vs 2	0.886183	NS or Estimate < 0.5
FAM170A	0.830618	0.277447	2.99378	0.0401877	1.39591	1 vs 2	0.386057	P < 0.05
APBB1	0.163951	0.998541	0.164191	0.877544	0.0567312	1 vs 2	0.980027	NS or Estimate < 0.5
PPP6R3	0.163951	0.672517	0.243787	0.819389	0.08651	1 vs 2	0.959809	NS or Estimate < 0.5
PLIN3	-1	0.643666	-1.5536	0.195243	0.709424	1 vs 2	0.648965	NS or Estimate < 0.5
DDHD2	-0.471679	0.68087	-0.692759	0.526579	0.278536	1 vs 2	0.857003	NS or Estimate < 0.5
ODR4	-0.276692	1.10493	-0.250416	0.814602	0.0890544	1 vs 2	0.959122	NS or Estimate < 0.5
PRR29	-1.03104	0.872189	-1.18212	0.302628	0.51909	1 vs 2	0.744215	NS or Estimate < 0.5
TRAF3IP2	-0.421011	0.584789	-0.719937	0.511387	0.291251	1 vs 2	0.851541	NS or Estimate < 0.5
FLNB	0.194988	0.556154	0.3506	0.743573	0.128676	1 vs 2	0.944972	NS or Estimate < 0.5
BRD8	1.19499	0.609388	1.96096	0.12142	0.915709	1 vs 2	0.578938	NS or Estimate < 0.5
MRGPRG	-0.697703	0.724378	-0.963175	0.390003	0.408932	1 vs 2	0.798252	NS or Estimate < 0.5
FAM180B	-1.42101	0.47841	-2.97028	0.0411329	1.38581	1 vs 2	0.389341	P < 0.05
MTF2	-0.502716	0.574099	-0.87566	0.430649	0.365876	1 vs 2	0.81584	NS or Estimate < 0.5
ARHGAP40	-1	0.579899	-1.72444	0.159718	0.796645	1 vs 2	0.631671	NS or Estimate < 0.5
SHISAL2B	-0.226024	0.499256	-0.452722	0.674217	0.1712	1 vs 2	0.915741	NS or Estimate < 0.5
C5orf63	-1.22602	0.278333	-4.40489	0.0116468	1.93379	1 vs 2	0.259464	P < 0.05
CFAP44	0.163951	0.492685	0.33277	0.756017	0.121468	1 vs 2	0.947394	NS or Estimate < 0.5
IYD	-1.22602	0.683699	-1.79322	0.147397	0.831513	1 vs 2	0.609195	NS or Estimate < 0.5
ZNF605	0.497284	0.258131	1.92648	0.126326	0.898508	1 vs 2	0.58952	NS or Estimate < 0.5
ARHGAP4	-0.892691	0.760628	-1.17362	0.305657	0.514765	1 vs 2	0.744215	NS or Estimate < 0.5
NPAS3	0.352965	0.931944	0.37874	0.724126	0.140186	1 vs 2	0.937448	NS or Estimate < 0.5
ACIN1	0.302297	0.793186	0.381117	0.722494	0.141166	1 vs 2	0.936044	NS or Estimate < 0.5
FXYD6	-0.118715	0.813537	-0.145924	0.89104	0.0501029	1 vs 2	0.980027	NS or Estimate < 0.5
TMEM41B	-2.82848	0.530193	-5.3348	0.00594602	2.22577	1 vs 2	0.213222	P < 0.05
HERC6	-0.226024	0.712214	-0.317354	0.76685	0.11529	1 vs 2	0.95288	NS or Estimate < 0.5
LDHA	1.49516	0.482294	3.10011	0.0362173	1.44108	1 vs 2	0.372697	P < 0.05
ZNF268	1.07627	0.752633	1.43001	0.22594	0.646007	1 vs 2	0.679905	NS or Estimate < 0.5
MKS1	-0.590394	0.693375	-0.851478	0.442478	0.354108	1 vs 2	0.822922	NS or Estimate < 0.5
DAG1	-0.0310365	0.615495	-0.0504252	0.962201	0.0167341	1 vs 2	0.981787	NS or Estimate < 0.5
STARD3	-0.226024	0.735668	-0.307236	0.773995	0.111262	1 vs 2	0.955711	NS or Estimate < 0.5
HES7	-0.444475	0.355916	-1.24882	0.279829	0.553107	1 vs 2	0.725351	NS or Estimate < 0.5
PROM2	-0.697703	0.592958	-1.17665	0.304576	0.516304	1 vs 2	0.744215	NS or Estimate < 0.5
BIRC2	-1	0.709256	-1.40993	0.231369	0.635695	1 vs 2	0.680653	NS or Estimate < 0.5
EPB41	-0.697703	0.699148	-0.997934	0.374789	0.426213	1 vs 2	0.792142	NS or Estimate < 0.5
NDUFS2	-0.502716	0.503075	-0.999287	0.374207	0.426888	1 vs 2	0.792142	NS or Estimate < 0.5
HAUS4	-0.138346	0.694597	-0.199174	0.851841	0.0696414	1 vs 2	0.969587	NS or Estimate < 0.5
ARHGAP25	0.409606	1.09575	0.373812	0.727514	0.138159	1 vs 2	0.94053	NS or Estimate < 0.5
RGMA	2.46625	0.230626	10.6937	0.000433242	3.36327	1 vs 2	0.0695218	P < 0.05
SLC26A11	0.497284	0.569757	0.8728	0.432035	0.364481	1 vs 2	0.81584	NS or Estimate < 0.5
SHMT2	-0.226024	0.499256	-0.452722	0.674217	0.1712	1 vs 2	0.915741	NS or Estimate < 0.5
MTUS1	1.3023	0.685021	1.9011	0.130073	0.885813	1 vs 2	0.593711	NS or Estimate < 0.5
SMOC2	0.302297	0.72274	0.418265	0.697233	0.156622	1 vs 2	0.923993	NS or Estimate < 0.5
EHHADH	0.302297	0.593525	0.509324	0.637337	0.195631	1 vs 2	0.905172	NS or Estimate < 0.5
MPP1	-1.42101	0.672408	-2.11332	0.102108	0.990941	1 vs 2	0.544675	NS or Estimate < 0.5
FAM122B	0.302297	0.638978	0.473094	0.660807	0.179925	1 vs 2	0.915482	NS or Estimate < 0.5
AFF1	1.02561	0.294714	3.48	0.0253521	1.59599	1 vs 2	0.33466	P < 0.05
FAM104B	0.238082	0.684115	0.348014	0.745372	0.127627	1 vs 2	0.945759	NS or Estimate < 0.5
XIAP	-1.47168	0.360903	-4.07777	0.015126	1.82027	1 vs 2	0.275433	P < 0.05
CAAP1	0.107309	0.763275	0.140591	0.894989	0.0481823	1 vs 2	0.981357	NS or Estimate < 0.5
NEU4	0.409606	0.693375	0.590742	0.586456	0.231764	1 vs 2	0.883155	NS or Estimate < 0.5
RAB35	-0.892691	0.695568	-1.2834	0.26866	0.570797	1 vs 2	0.712244	NS or Estimate < 0.5
DMAC2	-1.57899	0.486177	-3.24777	0.0314421	1.50249	1 vs 2	0.359439	P < 0.05
CMSS1	-0.333333	1.0625	-0.313727	0.769408	0.113843	1 vs 2	0.955481	NS or Estimate < 0.5
TNFAIP8L1	-1.13835	0.980116	-1.16144	0.310047	0.508573	1 vs 2	0.74785	NS or Estimate < 0.5
TMEM178A	-0.471679	0.662796	-0.711651	0.515984	0.287363	1 vs 2	0.852396	NS or Estimate < 0.5
KCTD7	0.302297	0.387386	0.78035	0.478782	0.319862	1 vs 2	0.836278	NS or Estimate < 0.5
BIRC5	-0.271858	0.800818	-0.339476	0.751327	0.124171	1 vs 2	0.947394	NS or Estimate < 0.5
C3orf80	-0.226024	1.2319	-0.183477	0.863349	0.0638135	1 vs 2	0.975531	NS or Estimate < 0.5
TBC1D17	0.497284	0.771332	0.644709	0.554228	0.256311	1 vs 2	0.871658	NS or Estimate < 0.5
WWTR1	1.84053	0.317862	5.79036	0.00442138	2.35444	1 vs 2	0.188413	P < 0.05
EDN1	-0.0310365	0.387386	-0.0801176	0.939992	0.0268759	1 vs 2	0.981787	NS or Estimate < 0.5
TESC	-0.36437	0.382448	-0.952731	0.394677	0.403758	1 vs 2	0.798252	NS or Estimate < 0.5
TTC39B	-0.0310365	0.213309	-0.1455	0.891354	0.04995	1 vs 2	0.980027	NS or Estimate < 0.5
KRTCAP3	0.163951	0.450741	0.363737	0.734465	0.134029	1 vs 2	0.944758	NS or Estimate < 0.5
CUL7	0.163951	0.497699	0.329418	0.758368	0.12012	1 vs 2	0.948768	NS or Estimate < 0.5
BEX2	1.07627	0.642675	1.67468	0.169309	0.771319	1 vs 2	0.638798	NS or Estimate < 0.5
PDZD3	-0.169382	0.91576	-0.184964	0.862257	0.0643632	1 vs 2	0.974404	NS or Estimate < 0.5
IFT46	0.830618	0.719458	1.1545	0.312572	0.505051	1 vs 2	0.74785	NS or Estimate < 0.5
SAP25	-1.42101	0.344672	-4.1228	0.0145792	1.83627	1 vs 2	0.26978	P < 0.05
AQP7	-0.0310365	0.649954	-0.0477518	0.964203	0.0158314	1 vs 2	0.981787	NS or Estimate < 0.5
TJP2	0.937927	0.963962	0.972992	0.385653	0.413803	1 vs 2	0.796238	NS or Estimate < 0.5
DZIP1L	-1.03104	0.387386	-2.66152	0.056301	1.24948	1 vs 2	0.439755	NS or Estimate < 0.5
HHAT	0.163951	0.450741	0.363737	0.734465	0.134029	1 vs 2	0.944758	NS or Estimate < 0.5
LAS1L	-0.559357	0.471988	-1.18511	0.301572	0.52061	1 vs 2	0.744215	NS or Estimate < 0.5
MFSD5	0.773976	0.647563	1.19521	0.29802	0.525755	1 vs 2	0.744215	NS or Estimate < 0.5
ZNF736	-0.471679	0.68087	-0.692759	0.526579	0.278536	1 vs 2	0.857003	NS or Estimate < 0.5
STRBP	-1.30015	0.869883	-1.49463	0.209324	0.679182	1 vs 2	0.659232	NS or Estimate < 0.5
PET100	1.09974	1.00813	1.09087	0.336637	0.472838	1 vs 2	0.77171	NS or Estimate < 0.5
ZMYM3	0.245655	0.886265	0.27718	0.795376	0.0994273	1 vs 2	0.959062	NS or Estimate < 0.5
UBAP1	0.830618	0.41972	1.97898	0.11894	0.92467	1 vs 2	0.574247	NS or Estimate < 0.5
ZEB2	-1.8652	1.37662	-1.35492	0.246912	0.607458	1 vs 2	0.696283	NS or Estimate < 0.5
C3orf52	0.163951	0.652219	0.251374	0.813911	0.0894233	1 vs 2	0.959122	NS or Estimate < 0.5
NUDT16	-0.0310365	0.687791	-0.0451249	0.966171	0.0149461	1 vs 2	0.981787	NS or Estimate < 0.5
KXD1	0.497284	0.596372	0.833849	0.451266	0.345568	1 vs 2	0.82588	NS or Estimate < 0.5
AGA	0.440643	0.890211	0.494987	0.646566	0.189387	1 vs 2	0.910743	NS or Estimate < 0.5
TBP	1.49728	0.241032	6.21197	0.0034174	2.4663	1 vs 2	0.168905	P < 0.05
ZNF540	1.22942	0.771117	1.59433	0.186088	0.730282	1 vs 2	0.645212	NS or Estimate < 0.5
MASTL	-1.22602	0.844452	-1.45186	0.220179	0.657224	1 vs 2	0.671189	NS or Estimate < 0.5
PLS3	-0.471679	0.570297	-0.827077	0.454678	0.342296	1 vs 2	0.825883	NS or Estimate < 0.5
KCNJ13	-1.22602	0.424317	-2.8894	0.0445896	1.35077	1 vs 2	0.402952	P < 0.05
EFHC1	-0.0310365	0.816263	-0.0380226	0.971492	0.0125609	1 vs 2	0.981787	NS or Estimate < 0.5
KLHL7	-0.502716	0.642107	-0.782915	0.477434	0.321087	1 vs 2	0.836278	NS or Estimate < 0.5
GOLGA3	-0.36437	0.494257	-0.737207	0.501901	0.299382	1 vs 2	0.84238	NS or Estimate < 0.5
TECPR2	-0.502716	0.503075	-0.999287	0.374207	0.426888	1 vs 2	0.792142	NS or Estimate < 0.5
ZFP62	0.547952	0.626764	0.874256	0.431329	0.365192	1 vs 2	0.81584	NS or Estimate < 0.5
ZNF177	0.163951	0.563986	0.290701	0.78573	0.104727	1 vs 2	0.957229	NS or Estimate < 0.5
ZFYVE28	-0.0310365	0.373795	-0.0830308	0.937816	0.0278823	1 vs 2	0.981787	NS or Estimate < 0.5
RAB40C	0.163951	0.684662	0.239463	0.822517	0.0848552	1 vs 2	0.959809	NS or Estimate < 0.5
TSFM	-0.118715	0.960939	-0.12354	0.907638	0.0420872	1 vs 2	0.981787	NS or Estimate < 0.5
SLC38A6	-0.559357	0.694508	-0.8054	0.465739	0.331857	1 vs 2	0.835191	NS or Estimate < 0.5
PGM1	-0.0310365	1.01285	-0.0306426	0.977023	0.0100954	1 vs 2	0.982091	NS or Estimate < 0.5
YTHDF2	1.63563	0.919424	1.77897	0.149864	0.824303	1 vs 2	0.612699	NS or Estimate < 0.5
KIF21A	-0.169382	0.597153	-0.28365	0.790755	0.101958	1 vs 2	0.957995	NS or Estimate < 0.5
SP7	-0.25706	0.833341	-0.30847	0.773122	0.111752	1 vs 2	0.955711	NS or Estimate < 0.5
ARHGEF9	0.63563	0.373795	1.70048	0.164263	0.784461	1 vs 2	0.634465	NS or Estimate < 0.5
NEBL	0.440643	0.771315	0.571288	0.598372	0.223029	1 vs 2	0.887029	NS or Estimate < 0.5
MAN2B1	0.0256052	0.568007	0.045079	0.966205	0.0149307	1 vs 2	0.981787	NS or Estimate < 0.5
MRRF	0.409606	0.664383	0.616521	0.570909	0.243433	1 vs 2	0.880995	NS or Estimate < 0.5
TXNRD3	-0.226024	0.851604	-0.26541	0.803811	0.0948461	1 vs 2	0.959122	NS or Estimate < 0.5
DGCR2	-0.36437	0.839337	-0.434116	0.686594	0.1633	1 vs 2	0.922585	NS or Estimate < 0.5
BRD7	1.05664	0.787915	1.34106	0.250987	0.600348	1 vs 2	0.696283	NS or Estimate < 0.5
SPAM1	0.302297	0.853848	0.354041	0.741183	0.130075	1 vs 2	0.944972	NS or Estimate < 0.5
OSBPL10	-0.697703	0.542052	-1.28715	0.267474	0.572719	1 vs 2	0.711823	NS or Estimate < 0.5
SERINC5	-0.36437	0.928002	-0.392639	0.714611	0.14593	1 vs 2	0.931075	NS or Estimate < 0.5
POLL	-0.0310365	0.436308	-0.0711343	0.946705	0.0237851	1 vs 2	0.981787	NS or Estimate < 0.5
LDHB	1.12211	0.509983	2.20028	0.0926234	1.03328	1 vs 2	0.524515	NS or Estimate < 0.5
PRR7	-0.754345	0.772521	-0.976471	0.384122	0.415531	1 vs 2	0.79512	NS or Estimate < 0.5
DMXL2	0.107309	0.867566	0.12369	0.907527	0.0421405	1 vs 2	0.981787	NS or Estimate < 0.5
GOLGA7	0.830618	0.346059	2.40022	0.0743383	1.12879	1 vs 2	0.47788	NS or Estimate < 0.5
RABEPK	0.497284	0.503075	0.98849	0.378871	0.421509	1 vs 2	0.792142	NS or Estimate < 0.5
ARHGDIB	1.54312	0.73341	2.10403	0.103182	0.986394	1 vs 2	0.544675	NS or Estimate < 0.5
ARL1	-0.0310365	0.929357	-0.0333956	0.974959	0.0110136	1 vs 2	0.981787	NS or Estimate < 0.5
SLC34A3	-0.36437	0.789919	-0.461275	0.668569	0.174854	1 vs 2	0.915741	NS or Estimate < 0.5
CPEB2	-0.0876781	0.346059	-0.253362	0.812478	0.0901886	1 vs 2	0.959122	NS or Estimate < 0.5
LGALS3	2.07144	0.491798	4.21197	0.0135647	1.86759	1 vs 2	0.26978	P < 0.05
MAMLD1	-0.892691	0.525603	-1.69841	0.164661	0.783409	1 vs 2	0.634465	NS or Estimate < 0.5
PPP2R2A	1.22059	0.618576	1.97323	0.119726	0.921813	1 vs 2	0.575917	NS or Estimate < 0.5
SUCLG2	0.497284	0.36005	1.38115	0.239375	0.620922	1 vs 2	0.688323	NS or Estimate < 0.5
CD33	-1.08768	0.348924	-3.11724	0.0356216	1.44829	1 vs 2	0.370006	P < 0.05
RIF1	1.16395	0.350845	3.31756	0.0294455	1.53098	1 vs 2	0.353277	P < 0.05
KLF11	1.49728	0.36005	4.15854	0.0141619	1.84888	1 vs 2	0.26978	P < 0.05
SRPRA	0.163951	0.698852	0.234601	0.826038	0.0829998	1 vs 2	0.959809	NS or Estimate < 0.5
SYCP3	-1.22602	0.903147	-1.3575	0.24616	0.608783	1 vs 2	0.69592	NS or Estimate < 0.5
PHETA1	0.0762729	0.967832	0.078808	0.94097	0.0264241	1 vs 2	0.981787	NS or Estimate < 0.5
BHMT2	0.194988	0.839456	0.232278	0.827722	0.0821155	1 vs 2	0.959809	NS or Estimate < 0.5
STX3	1.16395	0.979833	1.18791	0.300584	0.522034	1 vs 2	0.744215	NS or Estimate < 0.5
SYNJ2	0.497284	0.540976	0.919235	0.409989	0.387227	1 vs 2	0.808836	NS or Estimate < 0.5
ZNF182	-1.22602	0.620016	-1.97741	0.119155	0.923889	1 vs 2	0.574247	NS or Estimate < 0.5
SCAMP5	0.302297	0.685021	0.441296	0.681804	0.166341	1 vs 2	0.922342	NS or Estimate < 0.5
IGLL5	4.53043	2.94336	1.5392	0.198589	0.702045	1 vs 2	0.653886	NS or Estimate < 0.5
SUFU	-0.0310365	0.213309	-0.1455	0.891354	0.04995	1 vs 2	0.980027	NS or Estimate < 0.5
ASGR2	-0.36437	0.85515	-0.426089	0.691971	0.159912	1 vs 2	0.923407	NS or Estimate < 0.5
ATP6AP1	-0.859512	0.79584	-1.08001	0.340911	0.467359	1 vs 2	0.776309	NS or Estimate < 0.5
ATR	-0.0620729	0.559664	-0.110911	0.917029	0.0376169	1 vs 2	0.981787	NS or Estimate < 0.5
GYG2	-1.30015	0.62404	-2.08345	0.10561	0.976295	1 vs 2	0.551469	NS or Estimate < 0.5
HADH	-0.118715	0.851243	-0.13946	0.895826	0.0477761	1 vs 2	0.981357	NS or Estimate < 0.5
SLAMF6	-0.559357	0.371679	-1.50495	0.206787	0.684476	1 vs 2	0.65587	NS or Estimate < 0.5
PIGT	1.07627	0.901172	1.1943	0.298338	0.525291	1 vs 2	0.744215	NS or Estimate < 0.5
CTTN	1.57142	0.5498	2.85816	0.046015	1.3371	1 vs 2	0.409865	P < 0.05
CLTA	1.67872	1.04294	1.6096	0.18277	0.738094	1 vs 2	0.644404	NS or Estimate < 0.5
TMLHE	-0.0310365	0.90525	-0.034285	0.974293	0.0113106	1 vs 2	0.981787	NS or Estimate < 0.5
PRMT7	0.214619	0.952505	0.22532	0.832774	0.079473	1 vs 2	0.961721	NS or Estimate < 0.5
KLHDC4	0.302297	0.768577	0.39332	0.714146	0.146213	1 vs 2	0.931075	NS or Estimate < 0.5
PHF8	0.245655	0.482555	0.509072	0.637498	0.195521	1 vs 2	0.905172	NS or Estimate < 0.5
CARD8	-1.36437	0.589963	-2.31263	0.0817953	1.08727	1 vs 2	0.498296	NS or Estimate < 0.5
PACSIN2	1.53506	0.768491	1.9975	0.116448	0.933869	1 vs 2	0.574247	NS or Estimate < 0.5
RNF17	-1.28267	0.395742	-3.24117	0.031639	1.49978	1 vs 2	0.359439	P < 0.05
MARF1	1.04309	0.750217	1.39039	0.236775	0.625664	1 vs 2	0.688323	NS or Estimate < 0.5
NDUFA2	0.0256052	0.492685	0.0519707	0.961044	0.0172568	1 vs 2	0.981787	NS or Estimate < 0.5
CLDN11	-0.471679	0.694597	-0.679069	0.534355	0.27217	1 vs 2	0.857806	NS or Estimate < 0.5
TUT7	-0.36437	0.773658	-0.47097	0.662198	0.179012	1 vs 2	0.915482	NS or Estimate < 0.5
ARHGDIA	1.07627	0.704312	1.52812	0.201205	0.696361	1 vs 2	0.65587	NS or Estimate < 0.5
NIT1	-0.438501	1.08225	-0.405173	0.706084	0.151144	1 vs 2	0.930178	NS or Estimate < 0.5
PLCXD2	-0.471679	0.855353	-0.551444	0.610685	0.214183	1 vs 2	0.893664	NS or Estimate < 0.5
CES3	-0.502716	0.874795	-0.574667	0.596291	0.224542	1 vs 2	0.886183	NS or Estimate < 0.5
BACH1	0.766403	0.602279	1.2725	0.272131	0.565221	1 vs 2	0.715723	NS or Estimate < 0.5
BAK1	-0.842023	0.523513	-1.60841	0.183027	0.737484	1 vs 2	0.644404	NS or Estimate < 0.5
BCAT2	-0.0310365	0.931678	-0.0333124	0.975021	0.0109858	1 vs 2	0.981787	NS or Estimate < 0.5
IFT80	-0.307728	0.540976	-0.568838	0.599883	0.221933	1 vs 2	0.887976	NS or Estimate < 0.5
RPH3AL	-1.30015	0.707716	-1.83711	0.140067	0.853666	1 vs 2	0.607724	NS or Estimate < 0.5
TAF6	0.528321	0.694597	0.760615	0.489255	0.310465	1 vs 2	0.837242	NS or Estimate < 0.5
ZNF674	0.107309	0.448497	0.239264	0.82266	0.0847795	1 vs 2	0.959809	NS or Estimate < 0.5
MTRNR2L1	0.709761	0.694929	1.02134	0.364835	0.437903	1 vs 2	0.79031	NS or Estimate < 0.5
KRTAP9-1	-1.13835	0.462739	-2.46002	0.06969	1.15683	1 vs 2	0.466005	NS or Estimate < 0.5
CTH	0.881285	0.91418	0.964017	0.389629	0.409349	1 vs 2	0.798252	NS or Estimate < 0.5
MTRNR2L5	2.07627	0.23878	8.69533	0.000963057	3.01635	1 vs 2	0.0969143	P < 0.05
ALS2CL	-0.36437	0.636159	-0.572765	0.597462	0.22369	1 vs 2	0.886183	NS or Estimate < 0.5
RALGPS1	0.163951	0.563986	0.290701	0.78573	0.104727	1 vs 2	0.957229	NS or Estimate < 0.5
DHX35	0.376428	0.858883	0.438276	0.683816	0.16506	1 vs 2	0.922342	NS or Estimate < 0.5
PLEKHA5	-3.14432	0.417031	-7.53978	0.00165741	2.78057	1 vs 2	0.121583	P < 0.05
HYI	0.302297	0.395742	0.763873	0.487514	0.312013	1 vs 2	0.836278	NS or Estimate < 0.5
FAM193B	2.18358	0.23878	9.14474	0.000793622	3.10039	1 vs 2	0.081505	P < 0.05
PIWIL1	0.302297	0.402001	0.751981	0.493891	0.306369	1 vs 2	0.83969	NS or Estimate < 0.5
[truncated: 8,272 more rows]
